# Supplementary material
Source: PubMed Central journal article supplement (PMC5039009)
Supplement: NIHMS818142-supplement-SI.pdf [file NIHMS818142-supplement-SI.pdf]

*Supporting Information For*

**Palladium-Catalyzed Enantioselective Redox-Relay Heck Arylation of  
1,1-Disubstituted Homoallylic Alcohols**

Zhi-Min Chen, Margaret J. Hilton, and Matthew S. Sigman\*

Department of Chemistry, University of Utah, 315 South 1400 East, Salt Lake City, Utah 84112,  
United States

E-mail: sigman@chem.utah.edu

**Table of Contents**

|                                                        |          |
|--------------------------------------------------------|----------|
| Experimental details for substrates and products ----- | S2-S8    |
| Analytical data for substrates and products -----      | S9-S39   |
| Methods for modeling strategy-----                     | S40-S45  |
| References -----                                       | S45-S46  |
| SFC spectra of products -----                          | S47-S80  |
| NMR spectra of substrates and products -----           | S81-S243 |
| Cartesian coordinates for optimized structures -----   | S244     |

## General information:

MeOH was dried by distilling from CaH<sub>2</sub>; DCM, Et<sub>2</sub>O, THF, and CH<sub>3</sub>CN were dried by passing through a column of activated alumina. Powdered 4 Å molecular sieves were activated by flowing N<sub>2</sub> through a glass tube of sieves maintained at 200 °C. Boronic acids were purchased from Aldrich, Alfa or Combi-Blocks. Pd(CH<sub>3</sub>CN)<sub>2</sub>(OTf)<sub>2</sub> and Pd(CH<sub>3</sub>CN)<sub>4</sub>(OTf)<sub>2</sub> were synthesized according to literature procedures.<sup>1,2</sup> Thin-layer chromatography was performed with EMD silica gel 60 F<sub>254</sub> plates eluting with solvents indicated, visualized by a 254 nm UV lamp and stained with phosphomolybdic acid (PMA). Flash chromatography was performed using EM reagent silica 60 (230-400 mesh). <sup>1</sup>H-NMR spectra were obtained at 300 MHz or 500 MHz. Chemical shifts are reported in ppm and referenced to CDCl<sub>3</sub> (δ = 7.26 ppm). <sup>13</sup>C-NMR spectra were obtained at 75 MHz, or 125 MHz, and referenced to CDCl<sub>3</sub> (δ = 77.00 ppm). IR spectra were recorded using a Thermo Nicolet FT-IR. High resolution mass spectrometry (HRMS) data were obtained on a Waters LCP Premier XE instrument by ESI/TOF. SFC (supercritical fluid chromatography) analysis was performed at 40 °C, using a Thar instrument fitted with OZ-H, OJ-H, AY-H, AD-H, and AS-H columns. Optical rotations were measured (Na D line) on a Perkin Elmer Model 343 Polarimeter fitted with a micro cell with a 1 dm path length; concentrations are reported in g/100 mL.

## Experimental details for substrates and products

1.1 Procedures for the synthesis of PyrOx ligands according to the literature procedure.<sup>3</sup>

**Figure S1.** Ligands screened in this report

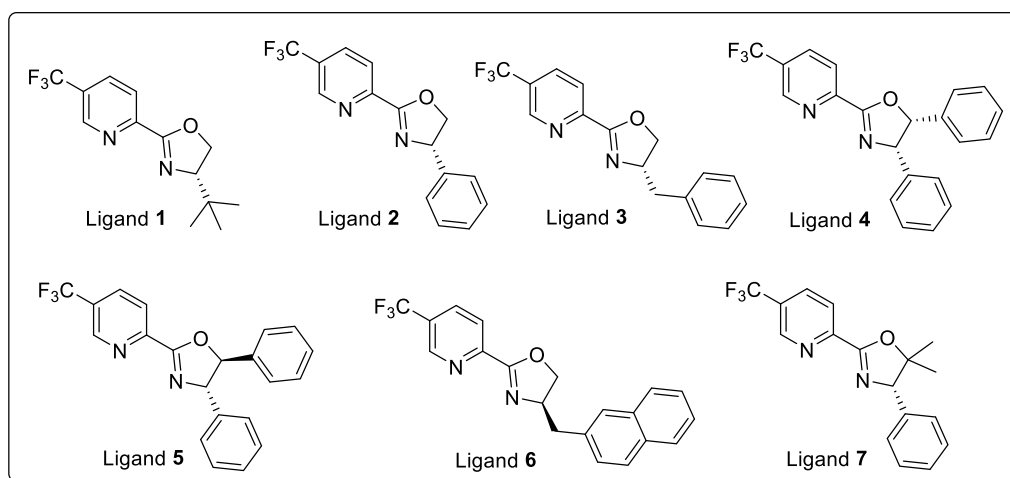

**L1, L2, L3, and L6** are known compounds and the analytical data (<sup>1</sup>H-NMR and <sup>13</sup>C-NMR) matches with the literature.<sup>3</sup>



Synthesis of *N*-((1*S*,2*R*)-2-hydroxy-1,2-diphenylethyl)-5-(trifluoromethyl)picolinamide (**S1**):

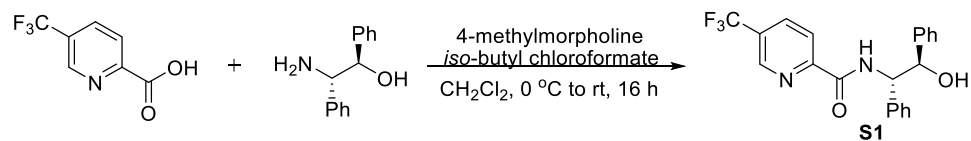

To a dry 250 mL round-bottom flask containing a stir bar was added 5-(trifluoromethyl)picolinic acid (1.91 g, 10.0 mmol, 1.0 equiv). Under an N<sub>2</sub> atmosphere, DCM (100 mL) and 4-methylmorpholine (1.27 mL, 11.5 mmol, 1.15 equiv) were added. Then, the reaction mixture was cooled to 0 °C, *iso*-butylchloroformate was added (1.57 mL, 12 mmol, 1.20 equiv) via syringe. The reaction mixture was stirred for another 30 min, then (1*R*,2*S*)-2-amino-1,2-diphenylethanol (2.35 g, 11 mmol, 1.1 equiv) was added. The mixture was allowed to slowly warm to room temperature and stirred for 16 h. The reaction was quenched *via* addition of water (10 mL). The aqueous layer was extracted with DCM (2 x 10 mL), and the combined organic layers were washed with brine (1 x 30 mL). The combined organic layers were dried over Na<sub>2</sub>SO<sub>4</sub>, and concentrated in vacuo and the residue was purified by flash column chromatography (1:5 EtOAc:hexanes) to give **S1** as a white solid (3.01 g, 78% yield), R<sub>f</sub> = 0.30 (1:2 EtOAc:hexanes).

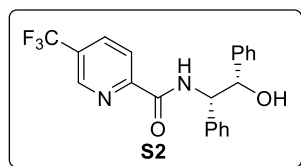

*N*-((1*S*,2*S*)-2-hydroxy-1,2-diphenylethyl)-5-(trifluoromethyl)picolinamide

The same procedure as used for the synthesis of **S1** (above) was followed using 5-(trifluoromethyl)picolinic acid (191 mg, 1.0 mmol, 1.0 equiv) in dichloromethane (10 mL), 4-methylmorpholine (0.13 mL, 1.15 mmol, 1.15 equiv), *iso*-butylchloroformate (0.16 mL, 1.2 mmol, 1.2 equiv), and (1*S*,2*S*)-2-amino-1,2-diphenylethanol (235 mg, 1.1 mmol, 1.1 equiv). Purification by silica gel flash chromatography (1:5 EtOAc:hexanes) to give **S2** as a white solid (320 mg, 83% yield), R<sub>f</sub> = 0.30 (1:2 EtOAc:hexanes).

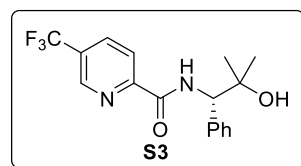

(*S*)-*N*-(2-hydroxy-2-methyl-1-phenylpropyl)-5-(trifluoromethyl)picolinamide

The same procedure as used for the synthesis of **S1** (above) was followed using 5-(trifluoromethyl)picolinic acid (300 mg, 1.57 mmol, 1.00 equiv) in dichloromethane (25 mL), 4-methylmorpholine (0.20 mL, 1.81 mmol, 1.15 equiv), *iso*-butylchloroformate (0.23 mL, 1.88 mmol,

1.20 equiv), and (S)-1-amino-2-methyl-1-phenylpropan-2-ol (285 mg, 1.73 mmol, 1.10 equiv). Purification by silica gel flash chromatography (1:6 EtOAc:hexanes) to give **S3** as a colorless oil (472 mg, 89% yield),  $R_f = 0.50$  (1:2 EtOAc:hexanes).

Synthesis of (4*S*,5*R*)-4,5-diphenyl-2-(5-(trifluoromethyl)pyridin-2-yl)-4,5-dihydrooxazole (**L4**):

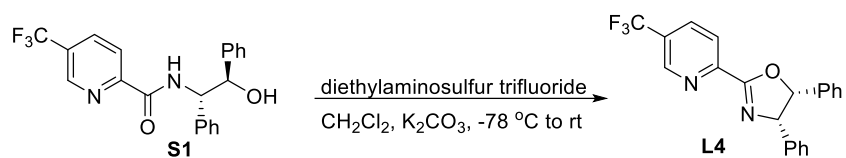

To a dry 100 mL round-bottom flask containing a stir bar was added *N*-((1*S*,2*R*)-2-hydroxy-1,2-diphenylethyl)-5-(trifluoromethyl)picolinamide **S1** (1.72 g, 4.4 mmol). Under an  $N_2$  atmosphere, DCM (35 mL) was added and then the reaction mixture was cooled to  $-78$  °C, the diethylaminosulfur trifluoride (0.83 mL, 6.2 mmol, 1.4 equiv) was added dropwise. The reaction mixture was stirred for 1 h. Then, potassium carbonate (1.23 g, 8.8 mmol, 2.0 equiv) was added. The mixture was allowed to warm to room temperature. The reaction was quenched *via* addition of water (5.0 mL). The aqueous layer was extracted with DCM (2 x 10 mL), and the combined organic layers were washed with brine (1 x 20 mL). The combined organic layers were dried over  $Na_2SO_4$  and concentrated *in vacuo* and the residue was purified by flash column chromatography (1:12 EtOAc:hexanes) to give **L4** as a colorless oil (1.33 g, 82% yield),  $R_f = 0.40$  (1:4 EtOAc:hexanes).

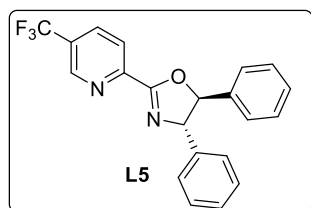

(4*S*,5*S*)-4,5-diphenyl-2-(5-(trifluoromethyl)pyridin-2-yl)-4,5-dihydrooxazole

The same procedure as used for the synthesis of **L4** was followed using 320 mg of **S2** (320 mg, 0.83 mmol, 1.0 equiv) in dichloromethane (10 mL), diethylaminosulfur trifluoride (0.16 mL, 1.16 mmol, 1.4 equiv), and potassium carbonate (232 mg, 1.66 mmol, 2.0 equiv). The crude mixture was purified by silica gel flash chromatography (1:15 EtOAc:hexanes) to afford **L5** as a colorless oil (61 mg, 20% yield),  $R_f = 0.40$  (1:4 EtOAc:hexanes).

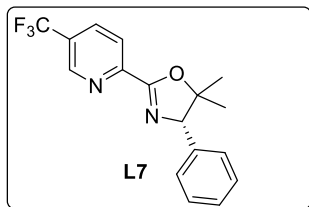

(S)-5,5-dimethyl-4-phenyl-2-(5-(trifluoromethyl)pyridin-2-yl)-4,5-dihydrooxazole

To a solution of **S3** (450 mg, 1.33 mmol, 1.00 equiv) in  $\text{CH}_2\text{Cl}_2$  (15 mL) was added methanesulfonic acid (0.26 mL, 3.99 mmol, 3.00 equiv). The resulting reaction mixture was heated at reflux until consumption of starting material was observed by TLC analysis. After this time, the reaction was cooled to room temperature and saturated aq.  $\text{NaHCO}_3$  (15 mL) was added. The layers were separated and the aqueous layer was extracted with  $\text{CH}_2\text{Cl}_2$  (20 mL). The combined organic layers were washed with  $\text{H}_2\text{O}$  (10 mL) and brine (10 mL). The combined organic layers were dried over  $\text{Na}_2\text{SO}_4$  and concentrated *in vacuo*. Purification of the residue by silica gel flash chromatography (1:8 EtOAc:hexanes + 1%  $\text{Et}_3\text{N}$ ) afforded **L7** as a colorless solid (120 mg, 28%),  $R_f = 0.40$  (1:5 EtOAc:hexanes).

**1.2** The substrates below are known compounds and were prepared according to the corresponding literature.<sup>4</sup> Analytical data ( $^1\text{H-NMR}$  and  $^{13}\text{C-NMR}$ ) matches with the literature.

**Figure S2.** 1,1-disubstituted alkenols examined in this report

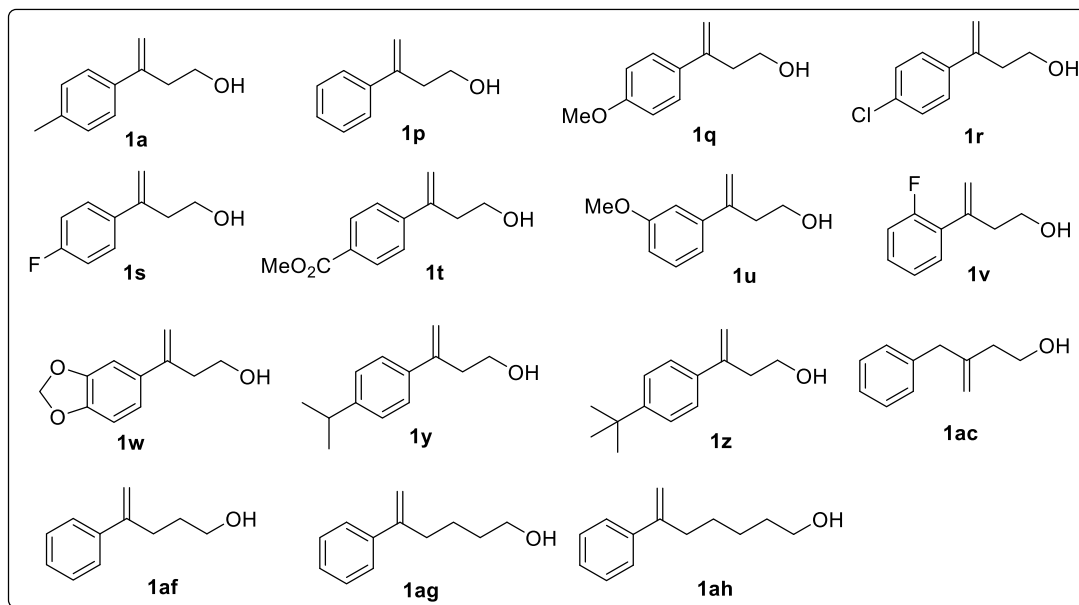

**1.3** Procedure for the preparation of the substrate **1aa**:

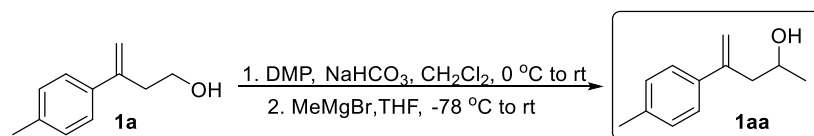

NaHCO<sub>3</sub> (400 mg, 4.0 mmol) and Dess-Martin periodinane (1.27 g, 3.0 mmol) were successively added to a solution of alkenyl alcohol **1a** (324 mg, 2.0 mmol) in dry CH<sub>2</sub>Cl<sub>2</sub> (10 mL) under N<sub>2</sub> at 0 °C. The reaction mixture was allowed to slowly warm to room temperature and stirred for 12 h. Then, saturated aqueous solution of NaHCO<sub>3</sub> (5 mL) and Na<sub>2</sub>S<sub>2</sub>O<sub>3</sub> (5 mL) was added to the reaction. The mixture was stirred for another 30 min and then the aqueous phase was extracted with CH<sub>2</sub>Cl<sub>2</sub> (3 x 10 mL). The combined organic layers were dried over Na<sub>2</sub>SO<sub>4</sub> and concentrated *in vacuo* and the residue was purified by flash column chromatography (1:10 EtOAc:hexanes) to provide the aldehyde intermediate as a colorless oil, which was directly used in the next step.

To a dry THF (10 mL) solution of the above aldehyde under N<sub>2</sub> at -78 °C was added methyl magnesium bromide (0.74 mL, 3 M solution in Et<sub>2</sub>O, 2.2 mmol, 1.1 equiv) followed by warming of the reaction system to room temperature. The reaction was monitored by TLC until the aldehyde disappeared completely. Then, the reaction was quenched *via* addition of saturated aqueous NH<sub>4</sub>Cl (5 mL), and diluted with Et<sub>2</sub>O (5 mL). The organic layer was separated and aqueous layer was extracted with Et<sub>2</sub>O (2 x 10 mL). The combined organic layers were washed with brine (10 mL), dried over Na<sub>2</sub>SO<sub>4</sub> and concentrated *in vacuo*. Purification of this material by chromatography on silica gel (1:10 → 1:5 EtOAc:hexanes) gave the compound **1aa** as a light yellow oil (306 mg, 87% overall yield from **1a**), R<sub>f</sub> = 0.30 (1:2 EtOAc:hexanes).

#### 1.4 Procedure for the preparation of the substrate **1ad**:

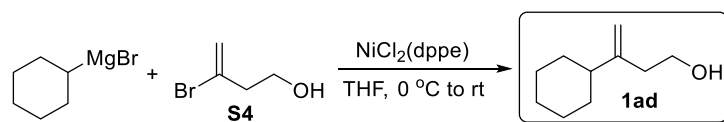

To a solution of alcohol **S4** (378 mg, 2.50 mmol, 1.0 equiv) and NiCl<sub>2</sub>(dppe) (66 mg, 125 μmol, 0.05 equiv) in 10 mL dry THF at 0 °C was added cyclohexyl magnesium bromide (6.25 mL, 1M in THF, 6.25 mmol, 2.5 equiv) dropwise. The reaction mixture was allowed to slowly warm to room temperature and stirred for 36 h. The resulting mixture was quenched with saturated aqueous NH<sub>4</sub>Cl (3 mL) and extracted with Et<sub>2</sub>O (2 x 10 mL). The organic layers were combined and dried over Na<sub>2</sub>SO<sub>4</sub> and concentrated. The crude residue was purified by flash column chromatography on silica gel (1:10 → 1:5 EtOAc:hexanes) to afford **1ad** as a colorless oil (254 mg, 66% yield), R<sub>f</sub> = 0.25 (1:2 EtOAc:hexanes).

#### 1.5 General procedure for the enantioselective redox-relay Heck reaction of 1,1-disubstituted alkenols (**procedure A**):

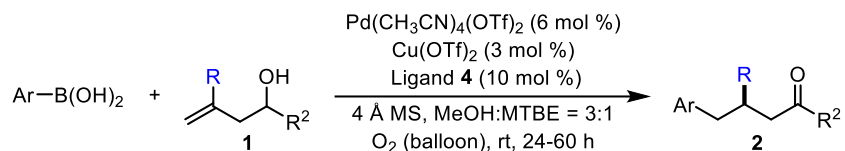

To a dry 10 mL Schlenk flask equipped with a stir bar was added Pd(CH<sub>3</sub>CN)<sub>4</sub>(OTf)<sub>2</sub> (10.3 mg, 0.018 mmol, 0.06 equiv), Cu(OTf)<sub>2</sub> (3.3 mg, 0.009 mmol, 0.03 equiv), ligand **4** (11.0 mg, 0.03 mmol, 0.1 equiv), 4 Å M.S. (75.0 mg), and MeOH/MTBE (3:1, 2.0 mL). To this flask, a three-way adapter fitted with a balloon of O<sub>2</sub> was added, and the flask was evacuated *via* house vacuum and refilled with O<sub>2</sub> three times while stirring. The resulting mixture was stirred for 10-15 min. Then, the corresponding alkenyl alcohol (0.3 mmol, 1.0 equiv) and corresponding aryl boronic acid (0.9 mmol, 3.0 equiv) in the 1.0 mL of MeOH/MTBE (3:1) were added. The resulting mixture was stirred for another 24 h to 60 h at room temperature. The reaction was monitored by TLC until the alcohol disappeared completely. The solvent was concentrated under reduced pressure, and the resulting residue was purified by flash column chromatography on silica gel (1:16→1:6 EtOAc:hexanes) to give the corresponding aldehyde.

#### 1.6 General procedure of reduction (**procedure B** for chiral separation):

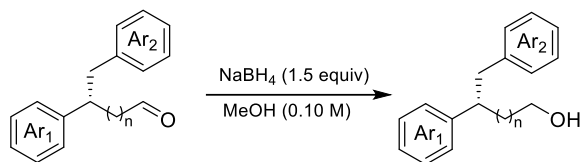

The aldehyde (1.0 equiv) was dissolved in MeOH in a 10 mL scintillation vial equipped with a stir bar. Sodium borohydride (1.5 equiv) was added, and the resulting mixture was stirred for 30 min. The solvent was removed under reduced pressure, and the resulting residue was transferred to a separatory funnel using Et<sub>2</sub>O (10 mL) and H<sub>2</sub>O (5 mL). The aqueous layer was extracted with Et<sub>2</sub>O (2 x 10 mL), and the combined organic layers were washed with brine (10 mL). The organic layer was then dried over Na<sub>2</sub>SO<sub>4</sub>, and concentrated under reduced pressure. The crude residue was purified by flash column chromatography on silica gel (1:8→1:2 EtOAc:hexanes) to give the corresponding alcohol.

#### 1.7 Procedure for the preparation of the ester **4ae** (for chiral separation):

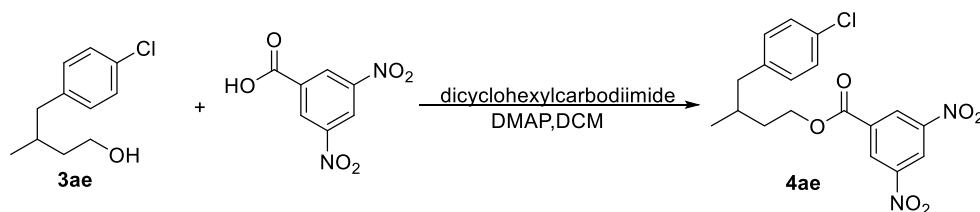

To a mixture of alcohol **3ae** (39.6 mg, 0.20 mmol, 1.0 equiv), DMAP (12.2 mg, 0.05 mmol, 0.25

equiv), and 3,5-dinitrobenzoic acid (50.9 mg, 0.24 mmol, 1.2 equiv) in DCM (5 mL) was added dicyclohexylcarbodiimide (49.5 mg, 0.24 mmol, 1.2 equiv) at room temperature. The resulting mixture was stirred 16 h. The resulting mixture was concentrated under reduced pressure. The crude residue was purified by flash column chromatography on silica gel (1:15→1:12 EtOAc:hexanes) to give the ester **4ae** (66 mg, 82% yield),  $R_f = 0.40$  (1:4 EtOAc:hexanes).

### 1.8 Procedure for the modeling of ligands

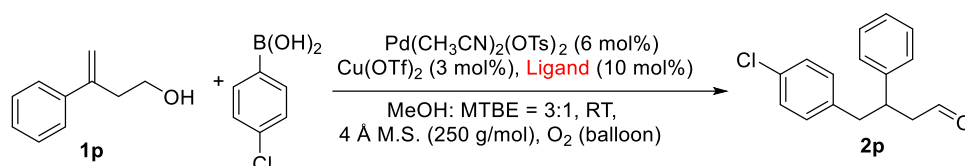

To a dry 10 mL Schlenk flask equipped with a stir bar was added  $\text{Pd}(\text{CH}_3\text{CN})_4(\text{OTs})_2$  (9.5 mg, 0.018 mmol, 0.06 equiv),  $\text{Cu}(\text{OTf})_2$  (3.3 mg, 0.009 mmol, 0.03 equiv), ligand (0.03 mmol, 0.1 equiv), 4 Å M.S. (75.0 mg), and MeOH/MTBE (3:1, 2.0 mL). To this flask, a three-way adapter fitted with a balloon of  $\text{O}_2$  was added, and the flask was evacuated via house vacuum and refilled with  $\text{O}_2$  three times while stirring. The resulting mixture was stirred for 10-15 min. Then, the alkenyl alcohol **1p** (44.4 mg, 0.3 mmol, 1.0 equiv) and 4-chlorophenylboronic acid (140.4 mg, 0.9 mmol, 3.0 equiv) in MeOH/MTBE (3:1, 1.0 mL) were added. The resulting mixture was stirred for another 24 h at room temperature. The reaction was monitored by TLC until the alcohol disappeared completely. The solvent was concentrated under reduced pressure, and the resulting residue was purified by flash column chromatography on silica gel (1:15 EtOAc:hexanes) to give aldehyde **2p** as a colorless oil.

**Table S1. Ligand Screen Data**

| Ligand             | L1    | L2    | L3    | L4   | L5       | L6    | L7       |
|--------------------|-------|-------|-------|------|----------|-------|----------|
| Isolated yield (%) | 31    | 44    | 56    | 50   | 52       | 43    | 51       |
| Er                 | 39:61 | 16:84 | 58:42 | 6:94 | 7.5:92.5 | 44:56 | 9.5:90.5 |

## Analytical data for the substrates and products:

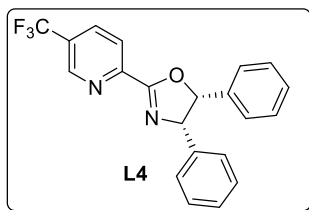

(4*S*,5*R*)-4,5-diphenyl-2-(5-(trifluoromethyl)pyridin-2-yl)-4,5-dihydrooxazole

**<sup>1</sup>H NMR** (300 MHz, CDCl<sub>3</sub>): δ 9.04 (s, 1H), 8.34 (d, *J* = 4.5 Hz, 1H), 8.05 (dd, *J* = 3.0, 1.5 Hz, 1H), 7.39-7.29 (m, 10H), 5.56 (d, *J* = 4.5 Hz, 1H), 5.36 (d, *J* = 4.5 Hz, 1H); **<sup>13</sup>C NMR** (75 MHz, CDCl<sub>3</sub>): δ 162.0, 149.6, 146.7 (d, *J<sub>F</sub>* = 1.5 Hz), 140.8, 139.4, 134.0 (d, *J<sub>F</sub>* = 1.5 Hz), 128.9, 128.8, 127.9, 126.7, 126.6 (q, *J<sub>F</sub>* = 272.2 Hz), 125.9, 124.0, 89.9, 78.9; **<sup>19</sup>F NMR** (282 MHz, CDCl<sub>3</sub>): δ -62.9; **IR** (neat): 1642, 1604, 1323, 1127, 1097, 697 cm<sup>-1</sup>; [α]<sub>D</sub><sup>20</sup> = -21.4 (c = 1.0, EtOH); **HRMS** (ESI) *m/z* calcd. for C<sub>21</sub>H<sub>15</sub>F<sub>3</sub>ON<sub>2</sub>Na (M+Na)<sup>+</sup>: 391.1034, found 391.1041.

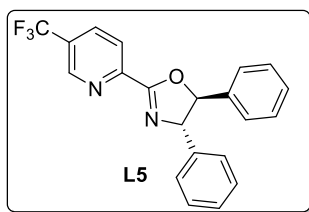

(4*S*,5*S*)-4,5-diphenyl-2-(5-(trifluoromethyl)pyridin-2-yl)-4,5-dihydrooxazole

**<sup>1</sup>H NMR** (500 MHz, CDCl<sub>3</sub>): δ 8.95 (s, 1H), 8.28 (d, *J* = 5.0 Hz, 1H), 8.01 (d, *J<sub>2</sub>* = 2.5 Hz, 1H), 7.33-7.18 (m, 10H), 5.48 (d, *J* = 5.0 Hz, 1H), 5.28 (d, *J* = 5.0 Hz, 1H); **<sup>13</sup>C NMR** (125 MHz, CDCl<sub>3</sub>): δ 162.1, 149.7, 146.9, 140.9, 139.4, 134.1, 129.0, 128.8, 128.0, 126.8, 126.7 (q, *J<sub>F</sub>* = 272.2 Hz), 126.0, 124.1, 90.0, 79.0; **<sup>19</sup>F NMR** (282 MHz, CDCl<sub>3</sub>): δ -63.0; **IR** (neat) ν = 1604, 1325, 1129, 1099, 698 cm<sup>-1</sup>; [α]<sub>D</sub><sup>20</sup> = -20.0 (c = 0.5, EtOH); **HRMS** *m/z* (ESI) calcd. for C<sub>21</sub>H<sub>15</sub>F<sub>3</sub>ON<sub>2</sub>Na (M+Na)<sup>+</sup>: 391.1034, found 391.1040.

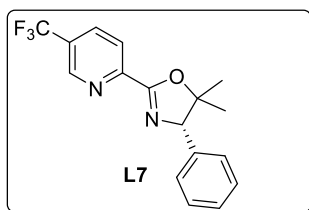

(*S*)-5,5-dimethyl-4-phenyl-2-(5-(trifluoromethyl)pyridin-2-yl)-4,5-dihydrooxazole

**<sup>1</sup>H NMR** (500 MHz, CDCl<sub>3</sub>): δ 9.00 (s, 1H), 8.36 (d, *J* = 5.0 Hz, 1H), 8.06 (d, *J* = 5.0 Hz, 1H), 7.37-7.24 (m, 5H), 5.14 (s, 1H), 1.73 (s, 3H), 1.01 (s, 3H); **<sup>13</sup>C NMR** (75 MHz, CDCl<sub>3</sub>): δ 161.9, 150.3, 146.6, 140.8, 138.0, 133.9, 128.4, 127.8, 127.2, 125.3 (q, *J<sub>F</sub>* = 271.2 Hz), 123.9, 89.2, 78.7, 29.1, 23.8; **<sup>19</sup>F NMR** (282 MHz, CDCl<sub>3</sub>): δ -63.0; **IR** (neat) ν = 1637, 1603, 1324, 1127, 1092, 1015,

743, 701  $\text{cm}^{-1}$ ;  $[\alpha]_{\text{D}}^{20} = +24.4$  ( $c = 0.43$ , EtOH); **HRMS**  $m/z$  (ESI) calcd. for  $\text{C}_{17}\text{H}_{15}\text{F}_3\text{ON}_2\text{Na}$  ( $\text{M}+\text{Na}$ ) $^+$ : 343.1034, found 343.1040.

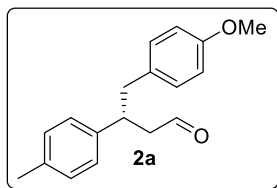

(*R*)-4-(4-methoxyphenyl)-3-(*p*-tolyl)butanal

General procedure A was followed using 4-methoxyphenylboronic acid (137 mg, 0.90 mmol) and 3-(*p*-tolyl)but-3-en-1-ol (**1a**, 49 mg, 0.30 mmol). The crude mixture was purified by silica gel flash chromatography (1:12 EtOAc:hexanes) to afford product **2a** as a colorless oil (35 mg, 43% yield, 7.5:92.5 er),  $R_f = 0.30$  (1:4 EtOAc:hexanes).  **$^1\text{H NMR}$**  (500 MHz,  $\text{CDCl}_3$ ):  $\delta$  9.57 (t,  $J = 5.0$  Hz, 1H), 7.09 (d,  $J = 5.0$  Hz, 2H), 7.04 (d,  $J = 5.0$  Hz, 2H), 6.97 (d,  $J = 5.0$  Hz, 2H), 6.78-6.76 (m, 2H), 3.77 (s, 3H), 3.43-3.38 (m, 1H), 2.89 (dd,  $J = 7.5, 2.5$ , 1H), 2.79 (dd,  $J = 7.5, 2.5$  Hz, 1H), 2.81-2.69 (m, 2H), 2.31 (s, 3H);  **$^{13}\text{C NMR}$**  (75 MHz,  $\text{CDCl}_3$ ):  $\delta$  201.8, 158.1, 140.3, 136.2, 131.4, 130.2, 129.3, 127.4, 113.7, 55.2, 49.0, 42.5, 41.8, 21.0; **IR** (neat): 2920, 1722, 1512, 1246, 1035, 828  $\text{cm}^{-1}$ ;  $[\alpha]_{\text{D}}^{20} = +51.8$  ( $c = 0.5$ , EtOH); **HRMS** (ESI)  $m/z$  calcd. for  $\text{C}_{18}\text{H}_{20}\text{O}_2\text{Na}$  ( $\text{M}+\text{Na}$ ) $^+$ : 291.1361, found 291.1365.

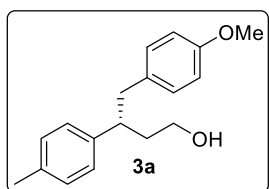

(*R*)-4-(4-methoxyphenyl)-3-(*p*-tolyl)butan-1-ol

General procedure B was followed using sodium borohydride (6 mg, 0.15 mmol) and aldehyde **2a** (27 mg, 0.10 mmol). The crude mixture was purified by silica gel flash chromatography (1:4 EtOAc:hexanes) to afford product **3a** as a colorless oil (25 mg, 92% yield),  $R_f = 0.20$  (1:2 EtOAc:hexanes).  **$^1\text{H NMR}$**  (300 MHz,  $\text{CDCl}_3$ ):  $\delta$  7.10-7.02 (m, 4H), 6.96 (d,  $J = 4.5$  Hz, 2H), 6.77-6.74 (m, 2H), 3.76 (s, 3H), 3.52-3.43 (m, 2H), 2.90-2.75 (m, 3H), 2.31 (s, 3H), 1.97-1.75 (m, 2H), 1.05 (brs, 1H);  **$^{13}\text{C NMR}$**  (75 MHz,  $\text{CDCl}_3$ ):  $\delta$  157.7, 141.3, 135.7, 132.5, 130.0, 129.1, 127.5, 113.5, 61.2, 55.2, 44.2, 43.0, 38.1, 21.0; **IR** (neat): 3351, 2931, 1512, 1246, 1037, 815  $\text{cm}^{-1}$ ;  $[\alpha]_{\text{D}}^{20} = +64.5$  ( $c = 0.5$ , EtOH); **HRMS** (ESI)  $m/z$  calcd. for  $\text{C}_{18}\text{H}_{22}\text{O}_2\text{Na}$  ( $\text{M}+\text{Na}$ ) $^+$ : 293.1517, found 293.1524.



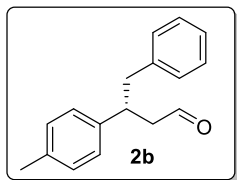

(*R*)-4-phenyl-3-(*p*-tolyl)butanal

General procedure A was followed using phenylboronic acid (110 mg, 0.90 mmol) and 3-(*p*-tolyl)but-3-en-1-ol (**1a**, 49 mg, 0.30 mmol). The crude mixture was purified by silica gel flash chromatography (1:15 EtOAc:hexanes) to afford product **2b** as a colorless oil (37 mg, 52% yield, 6:94 er),  $R_f = 0.40$  (1:4 EtOAc:hexanes).  $^1\text{H NMR}$  (500 MHz,  $\text{CDCl}_3$ ):  $\delta$  9.57 (t,  $J = 5.0$  Hz, 1H), 7.25-7.22 (m, 2H), 7.19-7.16 (m, 1H), 7.10-7.05 (m, 6H), 3.49-3.43 (m, 1H), 2.96 (dd,  $J = 7.5, 2.5$  Hz, 1H), 2.86 (dd,  $J = 7.5, 2.5$  Hz, 1H), 2.76-2.67 (m, 2H), 2.30 (s, 3H);  $^{13}\text{C NMR}$  (75 MHz,  $\text{CDCl}_3$ ):  $\delta$  201.8, 140.2, 139.4, 136.2, 129.3, 129.2, 128.3, 127.3, 126.3, 49.0, 43.4, 41.6, 21.0; **IR** (neat): 2922, 2360, 1723, 1514, 815, 701  $\text{cm}^{-1}$ ;  $[\alpha]_{\text{D}}^{20} = +56.6$  ( $c = 0.5$ , EtOH); **HRMS** (ESI)  $m/z$  calcd. for  $\text{C}_{17}\text{H}_{18}\text{ONa}$  ( $\text{M}+\text{Na}$ ) $^+$ : 261.1255, found 261.1266.

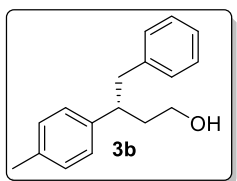

(*R*)-4-phenyl-3-(*p*-tolyl)butan-1-ol

General procedure B was followed using sodium borohydride (6 mg, 0.15 mmol) and aldehyde **2b** (24 mg, 0.10 mmol). The crude mixture was purified by silica gel flash chromatography (1:5 EtOAc:hexanes) to afford **3b** as a colorless oil (23 mg, 95% yield),  $R_f = 0.30$  (1:2 EtOAc:hexanes).  $^1\text{H NMR}$  (300 MHz,  $\text{CDCl}_3$ ):  $\delta$  7.28-7.16(m, 3H), 7.12-7.05 (m, 6H), 3.52-3.45 (m, 2H), 2.96-2.86 (m, 3H), 2.33 (s, 3H), 1.98-1.81 (m, 2H), 1.06(brs, 1H);  $^{13}\text{C NMR}$  (75 MHz,  $\text{CDCl}_3$ ):  $\delta$  141.2, 140.4, 135.8, 129.1, 128.1, 127.5, 125.9, 61.2, 44.1, 43.9, 38.2, 21.0; **IR** (neat): 3316, 2926, 1520, 1040, 815, 699  $\text{cm}^{-1}$ ;  $[\alpha]_{\text{D}}^{20} = +53.0$  ( $c = 0.2$ , EtOH); **HRMS** (ESI)  $m/z$  calcd. for  $\text{C}_{17}\text{H}_{20}\text{ONa}$  ( $\text{M}+\text{Na}$ ) $^+$ : 263.1412, found 263.1418.

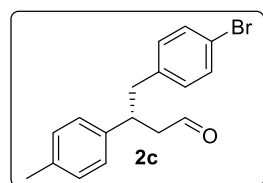

(*R*)-4-(4-bromophenyl)-3-(*p*-tolyl)butanal

General procedure A was followed using 4-bromophenylboronic acid (181 mg, 0.90 mmol) and 3-(*p*-tolyl)but-3-en-1-ol (**1a**, 49 mg, 0.30 mmol). The crude mixture was purified by silica gel flash

chromatography (1:15 EtOAc:hexanes) to afford **2c** as a colorless oil (52 mg, 55% yield, 5.5:94.5 er),  $R_f = 0.40$  (1:4 EtOAc:hexanes).  $^1\text{H NMR}$  (500 MHz,  $\text{CDCl}_3$ ):  $\delta$  9.62 (t,  $J = 5.0$  Hz, 1H), 7.34-7.32 (m, 2H), 7.08 (d,  $J = 5.0$  Hz, 2H), 7.01-7.00 (m, 2H), 6.91-6.88 (m, 2H), 3.44-3.38 (m, 1H), 2.86 (d,  $J = 2.5$  Hz, 2H), 2.78-2.68 (m, 2H), 2.31 (s, 3H);  $^{13}\text{C NMR}$  (125 MHz,  $\text{CDCl}_3$ ):  $\delta$  201.4, 139.6, 138.3, 136.4, 131.3, 130.9, 129.3, 127.3, 120.1, 49.1, 42.6, 41.4, 21.0; **IR** (neat): 2923, 2360, 1723, 1488, 1011, 816  $\text{cm}^{-1}$ ;  $[\alpha]_{\text{D}}^{20} = +67.2$  ( $c = 0.5$ , EtOH); **HRMS** (ESI)  $m/z$  calcd. for  $\text{C}_{17}\text{H}_{17}\text{ONaBr}$  ( $\text{M}+\text{Na}$ ) $^+$ : 339.0360, found 339.0344.

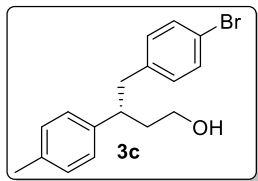

(*R*)-4-(4-bromophenyl)-3-(*p*-tolyl)butan-1-ol

General procedure B was followed using sodium borohydride (6 mg, 0.15 mmol) and aldehyde **2c** (32 mg, 0.10 mmol). The crude mixture was purified by silica gel flash chromatography (1:5 EtOAc:hexanes) to afford **3c** as a colorless oil (29 mg, 93% yield),  $R_f = 0.30$  (1:2 EtOAc:hexanes).  $^1\text{H NMR}$  (500 MHz,  $\text{CDCl}_3$ ):  $\delta$  7.32-7.30 (m, 2H), 7.07 (d,  $J = 5.0$  Hz, 2H), 7.00 (d,  $J = 5.0$  Hz, 2H), 6.89 (d,  $J = 5.0$  Hz, 2H), 3.53-3.42 (m, 2H), 2.97-2.91 (m, 1H), 3.84 (m, 2H), 2.31 (s, 3H), 1.97-1.90 (m, 1H), 1.87-1.80 (m, 1H), 1.11 (brs, 1H);  $^{13}\text{C NMR}$  (125 MHz,  $\text{CDCl}_3$ ):  $\delta$  140.6, 139.3, 135.9, 131.1, 130.8, 129.2, 127.5, 119.6, 61.0, 43.9, 43.2, 38.3, 21.0; **IR** (neat): 3338, 2925, 1487, 1011, 1072, 815  $\text{cm}^{-1}$ ;  $[\alpha]_{\text{D}}^{20} = +79.7$  ( $c = 1.0$ , EtOH); **HRMS** (ESI)  $m/z$  calcd. for  $\text{C}_{17}\text{H}_{19}\text{ONaBr}$  ( $\text{M}+\text{Na}$ ) $^+$ : 341.0517, found 341.0513.

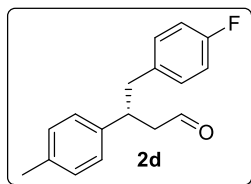

(*R*)-4-(4-fluorophenyl)-3-(*p*-tolyl)butanal

General procedure A was followed using 4-fluorophenylboronic acid (126 mg, 0.90 mmol) and 3-(*p*-tolyl)but-3-en-1-ol (**1a**, 49 mg, 0.30 mmol). The crude mixture was purified by silica gel flash chromatography (1:15 EtOAc:hexanes) to afford **2d** as a colorless oil (45 mg, 59% yield, 4.5:95.5 er),  $R_f = 0.40$  (1:4 EtOAc:hexanes).  $^1\text{H NMR}$  (500 MHz,  $\text{CDCl}_3$ ):  $\delta$  9.62-9.60 (m, 1H), 7.08 (d,  $J = 5.0$  Hz, 2H), 7.02-6.97 (m, 4H), 6.92-6.88 (m, 2H), 3.41 (m, 1H), 2.88 (d,  $J = 2.5$  Hz, 2H), 2.78-2.68 (m, 2H), 2.31 (s, 3H);  $^{13}\text{C NMR}$  (125 MHz,  $\text{CDCl}_3$ ):  $\delta$  201.5, 161.5 (d,  $J = 121.2$  Hz), 139.8, 136.3, 135.0 (d,  $J = 1.9$  Hz), 130.6 (d,  $J = 3.8$  Hz), 129.3, 127.4, 115.0 (d,  $J = 10.6$  Hz), 49.1, 42.4, 41.7 (d,  $J = 0.6$  Hz), 21.0;  $^{19}\text{F NMR}$  (282 MHz,  $\text{CDCl}_3$ ):  $\delta$  -119.5; **IR** (neat): 2925, 2361, 1724, 1488, 1011,

816  $\text{cm}^{-1}$ ;  $[\alpha]_{\text{D}}^{20} = +50.4$  ( $c = 0.31$ , EtOH); **HRMS** (ESI)  $m/z$  calcd. for  $\text{C}_{17}\text{H}_{17}\text{ONaF}(\text{M}+\text{Na})^+$ : 279.1161, found 279.1157.

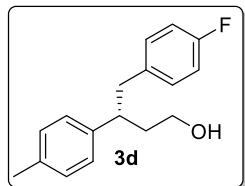

(*R*)-4-(4-fluorophenyl)-3-(*p*-tolyl)butan-1-ol

General procedure B was followed using sodium borohydride (6 mg, 0.15 mmol) and aldehyde **2d** (26 mg, 0.10 mmol). The crude mixture was purified by silica gel flash chromatography (1:5 EtOAc:hexanes) to afford **3d** as a colorless oil (24 mg, 93% yield),  $R_f = 0.30$  (1:2 EtOAc:hexanes).  **$^1\text{H NMR}$**  (300 MHz,  $\text{CDCl}_3$ ):  $\delta$  7.10-7.07 (m, 2H), 7.02-6.95 (m, 4H), 6.92-6.85 (m, 2H), 3.53-3.41 (m, 2H), 2.98-2.84 (m, 3H), 2.32 (s, 3H), 2.00-1.77 (m, 2H), 1.23 (brs, 1H);  **$^{13}\text{C NMR}$**  (75 MHz,  $\text{CDCl}_3$ ):  $\delta$  161.2 (d,  $J = 121.2$  Hz), 140.8, 136.0 (d,  $J = 1.5$  Hz), 135.8, 130.4 (d,  $J = 4.1$  Hz), 129.1, 127.5, 115.0 (d,  $J = 10.5$  Hz), 61.0, 44.1, 43.0, 38.2, 21.0;  **$^{19}\text{F NMR}$**  (282 MHz,  $\text{CDCl}_3$ ): -118.0; **IR** (neat): 3335, 2926, 1509, 1220, 1042, 815  $\text{cm}^{-1}$ ;  $[\alpha]_{\text{D}}^{20} = +66.5$  ( $c = 1.0$ , EtOH); **HRMS** (ESI)  $m/z$  calcd. for  $\text{C}_{17}\text{H}_{19}\text{ONaF}(\text{M}+\text{Na})^+$ : 281.1318, found 281.1316.

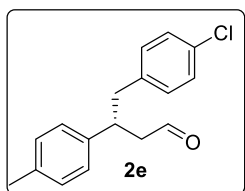

(*R*)-4-(4-chlorophenyl)-3-(*p*-tolyl)butanal

General procedure A was followed using 4-chlorophenylboronic acid (140 mg, 0.90 mmol) and 3-(*p*-tolyl)but-3-en-1-ol (**1a**, 49 mg, 0.30 mmol). The crude mixture was purified by silica gel flash chromatography (1:15 EtOAc:hexanes) to afford **2e** as a colorless oil (52 mg, 63% yield, 4.5:95.5 er),  $R_f = 0.40$  (1:4 EtOAc:hexanes).  **$^1\text{H NMR}$**  (500 MHz,  $\text{CDCl}_3$ ):  $\delta$  9.62 (t,  $J = 5.0$  Hz, 1H), 7.20-7.17 (m, 2H), 7.08 (d,  $J = 5.0$  Hz, 2H), 7.02-7.00 (m, 2H), 6.97-6.95 (m, 2H), 3.41 (m, 1H), 2.88 (d,  $J = 2.5$  Hz, 2H), 2.79-2.68 (m, 2H), 2.31 (s, 3H);  **$^{13}\text{C NMR}$**  (125 MHz,  $\text{CDCl}_3$ ):  $\delta$  201.4, 139.6, 137.8, 136.4, 132.0, 130.5, 129.3, 128.4, 127.3, 49.1, 42.5, 41.4, 21.0; **IR** (neat): 2924, 1722, 1492, 1092, 1015, 701  $\text{cm}^{-1}$ ;  $[\alpha]_{\text{D}}^{20} = +75.4$  ( $c = 0.5$ , EtOH); **HRMS** (ESI)  $m/z$  calcd. for  $\text{C}_{17}\text{H}_{17}\text{ONaCl}(\text{M}+\text{Na})^+$ : 295.0866, found 295.0866.

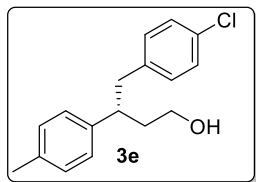

(*R*)-4-(4-chlorophenyl)-3-(*p*-tolyl)butan-1-ol

General procedure B was followed using sodium borohydride (6 mg, 0.15 mmol) and aldehyde **2e** (27 mg, 0.10 mmol). The crude mixture was purified by silica gel flash chromatography (1:5 EtOAc:hexanes) to afford **3e** as a colorless oil (25 mg, 96% yield).  $R_f = 0.30$  (1:2 EtOAc:hexanes).  $^1\text{H NMR}$  (500 MHz,  $\text{CDCl}_3$ ):  $\delta$  7.17-7.15 (m, 2H), 7.08-7.07 (m, 2H), 7.01-6.99 (m, 2H), 6.96-6.94 (m, 2H), 3.55-3.40 (m, 2H), 2.92-2.84 (m, 3H), 2.31 (s, 3H), 1.93-1.82 (m, 2H), 1.13 (brs, 1H);  $^{13}\text{C NMR}$  (75 MHz,  $\text{CDCl}_3$ ):  $\delta$  140.6, 138.8, 135.9, 131.6, 130.4, 129.2, 128.2, 127.5, 61.0, 44.0, 43.1, 38.3, 21.0; **IR** (neat): 3327, 2925, 1491, 1092, 1042, 816  $\text{cm}^{-1}$ ;  $[\alpha]_D^{20} = +81.0$  ( $c = 0.5$ , EtOH); **HRMS** (ESI)  $m/z$  calcd. for  $\text{C}_{17}\text{H}_{19}\text{ONaCl}$  ( $\text{M}+\text{Na}$ ) $^+$ : 297.1022, found 297.1024.

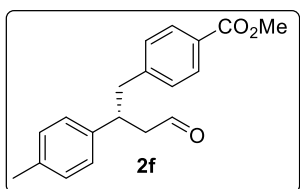

methyl (*R*)-4-(4-oxo-2-(*p*-tolyl)butyl)benzoate

General procedure A was followed using 4-methoxycarbonylphenylboronic acid (162 mg, 0.90 mmol) and 3-(*p*-tolyl)but-3-en-1-ol (**1a**, 49 mg, 0.30 mmol). The crude mixture was purified by silica gel flash chromatography (1:8 EtOAc:hexanes) to afford **2f** as a colorless oil (49 mg, 55% yield, 4.5:95.5 er),  $R_f = 0.30$  (1:4 EtOAc:hexanes).  $^1\text{H NMR}$  (500 MHz,  $\text{CDCl}_3$ ):  $\delta$  9.62 (m, 1H), 7.89-7.87 (m, 2H), 7.10-7.06 (m, 4H), 7.00-6.99 (m, 2H), 3.88 (s, 3H), 3.47 (m, 1H), 2.96-2.94 (m, 2H), 2.77-2.73 (m, 2H), 2.29 (s, 3H);  $^{13}\text{C NMR}$  (75 MHz,  $\text{CDCl}_3$ ):  $\delta$  201.3, 167.0, 144.8, 139.4, 136.4, 129.6, 129.3, 129.2, 128.2, 127.3, 52.0, 49.2, 43.2, 41.3, 21.0; **IR** (neat): 1720, 1435, 1280, 1111, 1020  $\text{cm}^{-1}$ ;  $[\alpha]_D^{20} = +96.4$  ( $c = 0.5$ , EtOH); **HRMS** (ESI)  $m/z$  calcd. for  $\text{C}_{19}\text{H}_{20}\text{O}_3\text{Na}$  ( $\text{M}+\text{Na}$ ) $^+$ : 319.1310, found 319.1316.

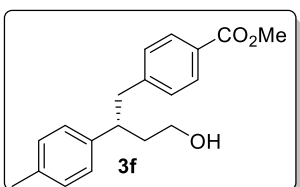

methyl (*R*)-4-(4-hydroxy-2-(*p*-tolyl)butyl)benzoate

General procedure B was followed using sodium borohydride (6 mg, 0.15 mmol) and aldehyde **2f** (30 mg, 0.10 mmol). The crude mixture was purified by silica gel flash chromatography (1:3

EtOAc:hexanes) to afford **3f** as a colorless oil (28 mg, 92% yield),  $R_f = 0.20$  (1:2 EtOAc:hexanes).  $^1\text{H NMR}$  (500 MHz,  $\text{CDCl}_3$ ):  $\delta$  7.87-7.85 (m, 2H), 7.09-7.05 (m, 4H), 7.00-6.98 (m, 2H), 3.87 (s, 3H), 3.54-3.51 (m, 1H), 3.44-3.43 (m, 1H), 3.00-2.91 (m, 3H), 2.30 (s, 3H), 1.95-1.92 (m, 1H), 1.88-1.85 (m, 1H), 1.17 (brs, 1H);  $^{13}\text{C NMR}$  (75 MHz,  $\text{CDCl}_3$ ):  $\delta$  167.1, 145.9, 140.4, 136.0, 129.4, 129.2, 127.8, 127.4, 60.9, 51.9, 43.8, 38.4, 21.0; **IR** (neat): 3413, 2931, 1719, 1435, 1279, 1110  $\text{cm}^{-1}$ ;  $[\alpha]_{\text{D}}^{20} = +99.3$  ( $c = 1.0$ , EtOH); **HRMS** (ESI)  $m/z$  calcd. for  $\text{C}_{19}\text{H}_{22}\text{O}_3\text{Na}$  ( $\text{M}+\text{Na}$ ) $^+$ : 321.1467, found 321.1469.

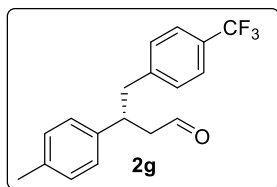

(*R*)-3-(*p*-tolyl)-4-(4-(trifluoromethyl)phenyl)butanal

General procedure A was followed using 4-(trifluoromethyl)phenylboronic acid (171 mg, 0.90 mmol) and 3-(*p*-tolyl)but-3-en-1-ol (**1a**, 49 mg, 0.30 mmol). The crude mixture was purified by silica gel flash chromatography (1:14 EtOAc:hexanes) to afford **2g** as a colorless oil (59 mg, 64% yield, 4:96 er),  $R_f = 0.40$  (1:4 EtOAc:hexanes).  $^1\text{H NMR}$  (500 MHz,  $\text{CDCl}_3$ ):  $\delta$  9.64 (t,  $J = 5.0$  Hz, 1H), 7.46 (d,  $J = 2.5$  Hz, 2H), 7.13 (d,  $J = 5.0$  Hz, 2H), 7.08 (d,  $J = 5.0$  Hz, 2H), 7.02-7.00 (m, 2H), 3.46 (m, 1H), 2.97-2.95 (m, 2H), 2.78-2.74 (m, 2H), 2.31 (s, 3H);  $^{13}\text{C NMR}$  (125 MHz,  $\text{CDCl}_3$ ):  $\delta$  201.1, 143.5, 139.4, 136.5, 129.5, 129.4, 128.6 (d,  $J = 16.1$  Hz), 127.3, 126.4 (q,  $J = 270.0$  Hz), 125.2 (q,  $J = 3.8$  Hz) 49.2, 42.9, 41.2, 21.0;  $^{19}\text{F NMR}$  (282 MHz,  $\text{CDCl}_3$ ):  $\delta$  -62.8; **IR** (neat): 2360, 1725, 1325, 1123, 1067  $\text{cm}^{-1}$ ;  $[\alpha]_{\text{D}}^{20} = +41.7$  ( $c = 0.5$ , EtOH); **HRMS** (ESI)  $m/z$  calcd. for  $\text{C}_{18}\text{H}_{17}\text{OF}_3\text{Na}$  ( $\text{M}+\text{Na}$ ) $^+$ : 329.1129, found 329.1135.

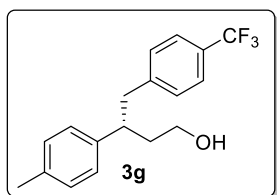

(*R*)-3-(*p*-tolyl)-4-(4-(trifluoromethyl)phenyl)butan-1-ol

General procedure B was followed using sodium borohydride (6 mg, 0.15 mmol) and aldehyde **2g** (31 mg, 0.10 mmol). The crude mixture was purified by silica gel flash chromatography (1:3 EtOAc:hexanes) to afford **3g** as a colorless oil (28 mg, 90% yield),  $R_f = 0.20$  (1:2 EtOAc:hexanes).  $^1\text{H NMR}$  (300 MHz,  $\text{CDCl}_3$ ):  $\delta$  7.46 (d,  $J = 4.5$  Hz, 2H), 7.15-7.07 (m, 4H), 7.02-7.00 (m, 2H), 3.52-3.42 (m, 2H), 3.02-2.93 (m, 3H), 2.32 (s, 3H), 1.96-1.86 (m, 2H), 1.20 (brs, 1H);  $^{13}\text{C NMR}$  (75 MHz,  $\text{CDCl}_3$ ):  $\delta$  144.5, 140.4, 136.0, 129.4, 129.2, 128.2 (d,  $J = 16.1$  Hz), 127.9 (q,  $J = 270.0$  Hz),

127.5, 125.0 (q,  $J = 3.8$  Hz), 60.9, 43.8, 43.5, 38.3, 21.0; **<sup>19</sup>F NMR** (282 MHz, CDCl<sub>3</sub>): -62.7; **IR** (neat): 3339, 2931, 1325, 1163, 1123, 1067 cm<sup>-1</sup>; [ $\alpha$ ]<sub>D</sub><sup>20</sup> = +69.5 (c = 1.0, EtOH); **HRMS** (ESI)  $m/z$  calcd. for C<sub>18</sub>H<sub>19</sub>OF<sub>3</sub>Na (M+Na)<sup>+</sup>: 331.1286, found 331.1297.

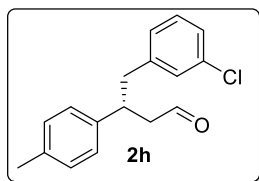

(*R*)-4-(3-chlorophenyl)-3-(*p*-tolyl)butanal

General procedure A was followed using 3-chlorophenylboronic acid (140 mg, 0.90 mmol) and 3-(*p*-tolyl)but-3-en-1-ol (**1a**, 49 mg, 0.30 mmol). The crude mixture was purified by silica gel flash chromatography (1:14 EtOAc:hexanes) to afford **2h** as a colorless oil (45 mg, 55% yield, 3.5:96.5 er),  $R_f = 0.40$  (1:4 EtOAc:hexanes). **<sup>1</sup>H NMR** (500 MHz, CDCl<sub>3</sub>):  $\delta$  9.61 (t,  $J = 5.0$  Hz, 1H), 7.16-7.14 (m, 2H), 7.10-7.06 (m, 3H), 7.03-7.02 (m, 2H), 6.92-6.90 (m, 1H), 3.44 (m, 1H), 2.92-2.84 (m, 2H), 2.79-2.68 (m, 2H), 2.31 (s, 3H); **<sup>13</sup>C NMR** (125 MHz, CDCl<sub>3</sub>):  $\delta$  201.3, 141.4, 139.6, 136.4, 134.0, 129.5, 129.3, 129.2, 127.4, 127.3, 126.5, 49.0, 42.9, 41.3, 21.0; **IR** (neat): 2924, 2359, 1723, 1515, 1080, 815 cm<sup>-1</sup>; [ $\alpha$ ]<sub>D</sub><sup>20</sup> = +53.0 (c = 0.24, EtOH); **HRMS** (ESI)  $m/z$  calcd. for C<sub>74</sub>H<sub>17</sub>ONaCl (M+Na)<sup>+</sup>: 295.0866, found 295.0868.

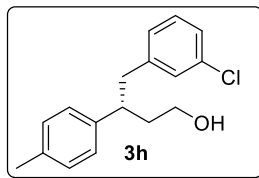

(*R*)-4-(3-chlorophenyl)-3-(*p*-tolyl)butan-1-ol

General procedure B was followed using sodium borohydride (6 mg, 0.15 mmol) and aldehyde **2h** (27 mg, 0.10 mmol). The crude mixture was purified by silica gel flash chromatography (1:3 EtOAc:hexanes) to afford **3h** as a colorless oil (26 mg, 94% yield),  $R_f = 0.20$  (1:2 EtOAc:hexanes). **<sup>1</sup>H NMR** (300 MHz, CDCl<sub>3</sub>):  $\delta$  7.13-7.00 (m, 7H), 6.92-6.89 (m, 1H), 3.51-3.41 (m, 2H), 2.96-2.84 (m, 3H), 2.31 (s, 3H), 1.95-1.83 (m, 2H), 1.16 (brs, 1H); **<sup>13</sup>C NMR** (75 MHz, CDCl<sub>3</sub>):  $\delta$  142.4, 140.6, 136.0, 133.8, 129.3, 129.2, 127.4, 127.3, 126.1, 61.0, 43.8, 43.5, 38.1, 21.0; **IR** (neat): 3329, 2932, 1597, 1476, 1042, 814 cm<sup>-1</sup>; [ $\alpha$ ]<sub>D</sub><sup>20</sup> = +76.9 (c = 1.0, EtOH); **HRMS** (ESI)  $m/z$  calcd. for C<sub>17</sub>H<sub>19</sub>ONaCl (M+Na)<sup>+</sup>: 297.1022, found 297.1020.

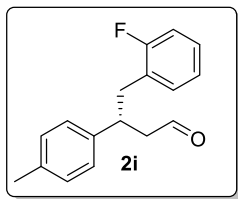

(*R*)-4-(2-fluorophenyl)-3-(*p*-tolyl)butanal

General procedure A was followed using 2-fluorophenylboronic acid (126 mg, 0.90 mmol) and 3-(*p*-tolyl)but-3-en-1-ol (**1a**, 49 mg, 0.30 mmol). The crude mixture was purified by silica gel flash chromatography (1:14 EtOAc:hexanes) to afford **2i** as a colorless oil (48 mg, 63% yield, 6:94 er),  $R_f = 0.40$  (1:4 EtOAc:hexanes). **<sup>1</sup>H NMR** (500 MHz, CDCl<sub>3</sub>):  $\delta$  9.58 (t,  $J = 5.0$  Hz, 1H), 7.18-7.14 (m, 1H), 7.09-7.05 (m, 4H), 7.01-6.98 (m, 3H), 3.57-3.47 (m, 1H), 2.94 (d,  $J = 5.0$  Hz, 2H), 2.76-2.70 (m, 2H), 2.30 (s, 3H); **<sup>13</sup>C NMR** (75 MHz, CDCl<sub>3</sub>):  $\delta$  201.6, 161.2 (d,  $J = 121.5$  Hz), 139.9, 136.3, 131.5 (d,  $J = 2.6$  Hz), 129.3, 128.1 (d,  $J = 4.1$  Hz), 127.2, 126.3 (d,  $J = 7.5$  Hz), 123.8 (d,  $J = 1.5$  Hz), 115.2 (d,  $J = 11.2$  Hz), 48.8, 40.4, 36.4, 21.0; **<sup>19</sup>F NMR** (282 MHz, CDCl<sub>3</sub>): -118.4; **IR** (neat): 2925, 2361, 1724, 1491, 1229, 757 cm<sup>-1</sup>;  $[\alpha]_D^{20} = +55.0$  (c = 0.3, EtOH); **HRMS** (ESI)  $m/z$  calcd. for C<sub>17</sub>H<sub>17</sub>ONaF (M+Na)<sup>+</sup>: 279.1161, found 279.1149.

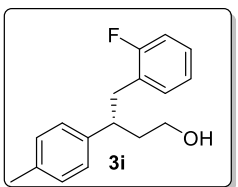

(*R*)-4-(2-fluorophenyl)-3-(*p*-tolyl)butan-1-ol

General procedure B was followed using sodium borohydride (6 mg, 0.15 mmol) and aldehyde **2i** (26 mg, 0.10 mmol). The crude mixture was purified by silica gel flash chromatography (1:3 EtOAc:hexanes) to afford **3i** as a colorless oil (24 mg, 93% yield),  $R_f = 0.20$  (1:2 EtOAc:hexanes). **<sup>1</sup>H NMR** (300 MHz, CDCl<sub>3</sub>):  $\delta$  7.17-6.94 (m, 8H), 3.56-3.39 (m, 2H), 3.02-2.88 (m, 3H), 2.32 (s, 3H), 1.95-1.88 (m, 2H), 1.22 (brs, 1H); **<sup>13</sup>C NMR** (75 MHz, CDCl<sub>3</sub>):  $\delta$  161.2 (d,  $J = 121.5$  Hz), 140.9, 135.8, 131.4 (d,  $J = 2.6$  Hz), 129.1, 127.7, 127.6, 127.4, 123.6 (d,  $J = 1.9$  Hz), 115.1 (d,  $J = 10.9$  Hz), 61.1, 42.8, 38.0, 36.8 (d,  $J = 0.4$  Hz), 21.0; **<sup>19</sup>F NMR** (282 MHz, CDCl<sub>3</sub>): -118.6; **IR** (neat): 3329, 2926, 1491, 1229, 1043, 755 cm<sup>-1</sup>;  $[\alpha]_D^{20} = +65.1$  (c = 1.0, EtOH); **HRMS** (ESI)  $m/z$  calcd. for C<sub>17</sub>H<sub>19</sub>ONaF (M+Na)<sup>+</sup>: 281.1318, found 281.1320.

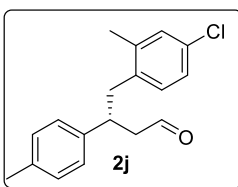

(*R*)-4-(4-chloro-2-methylphenyl)-3-(*p*-tolyl)butanal

General procedure A was followed using 4-chloro-2-methylphenylboronic acid (153 mg, 0.90 mmol) and 3-(*p*-tolyl)but-3-en-1-ol (**1a**, 49 mg, 0.30 mmol). The crude mixture was purified by silica gel flash chromatography (1:14 EtOAc:hexanes) to afford **2j** as a colorless oil (47 mg, 55% yield, 6.5:93.5 er),  $R_f = 0.40$  (1:4 EtOAc:hexanes). **<sup>1</sup>H NMR** (300 MHz, CDCl<sub>3</sub>): δ 9.60 (m, 1H), 7.10-7.07 (m, 3H), 7.02-6.99 (m, 3H), 6.86-6.82 (m, 1H), 3.40-3.34 (m, 1H), 2.85-2.83 (m, 2H), 2.78-2.76 (m, 2H), 2.31 (s, 3H), 2.21 (s, 3H); **<sup>13</sup>C NMR** (125 MHz, CDCl<sub>3</sub>): δ 201.3, 139.9, 138.2, 136.4, 136.2, 131.8, 131.3, 130.1, 129.3, 127.2, 125.7, 49.1, 40.3, 40.1, 21.0, 19.3; **IR** (neat): 2929, 1723, 1518, 1275, 1126, 817 cm<sup>-1</sup>;  $[\alpha]_D^{20} = +84.3$  (c = 0.5, EtOH); **HRMS** (ESI)  $m/z$  calcd. for C<sub>18</sub>H<sub>19</sub>ONaCl (M+Na)<sup>+</sup>: 309.1022, found 309.1024.

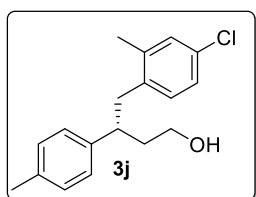

(*R*)-4-(4-chloro-2-methylphenyl)-3-(*p*-tolyl)butan-1-ol

General procedure B was followed using sodium borohydride (6 mg, 0.15 mmol) and aldehyde **2j** (29 mg, 0.10 mmol). The crude mixture was purified by silica gel flash chromatography (1:3 EtOAc:hexanes) to afford **3j** as a colorless oil (28 mg, 96% yield),  $R_f = 0.20$  (1:2 EtOAc:hexanes). **<sup>1</sup>H NMR** (300 MHz, CDCl<sub>3</sub>): δ 7.10-7.07 (m, 3H), 7.02-6.98 (m, 3H), 6.86 (d,  $J = 3.0$  Hz, 1H), 3.51-3.41 (m, 2H), 2.90-2.80 (m, 3H), 2.32 (s, 3H), 2.20 (s, 3H), 1.97-1.87 (m, 2H), 1.13 (brs, 1H); **<sup>13</sup>C NMR** (75 MHz, CDCl<sub>3</sub>): δ 140.9, 138.1, 137.1, 136.0, 131.3, 131.2, 129.9, 129.2, 127.4, 125.5, 61.1, 42.8, 40.6, 38.0, 21.0, 19.4; **IR** (neat): 3320, 2926, 1484, 1040, 881 cm<sup>-1</sup>;  $[\alpha]_D^{20} = +90.3$  (c = 1.0, EtOH); **HRMS** (ESI)  $m/z$  calcd. for C<sub>18</sub>H<sub>21</sub>ONaCl (M+Na)<sup>+</sup>: 311.1179, found 311.1181.

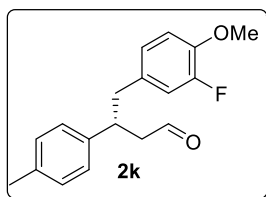

(*R*)-4-(3-fluoro-4-methoxyphenyl)-3-(*p*-tolyl)butanal

General procedure A was followed using 3-fluoro-4-methoxyphenylboronic acid (153 mg, 0.90 mmol) and 3-(*p*-tolyl)but-3-en-1-ol (**1a**, 49 mg, 0.30 mmol). The crude mixture was purified by silica gel flash chromatography (1:10 EtOAc:hexanes) to afford **2k** as a colorless oil (43 mg, 50% yield, 5:95 er),  $R_f = 0.30$  (1:4 EtOAc:hexanes). **<sup>1</sup>H NMR** (500 MHz, CDCl<sub>3</sub>): δ 9.60 (m, 1H), 7.08 (d,  $J = 5.0$  Hz, 2H), 7.02 (d,  $J = 5.0$  Hz, 2H), 6.83-6.73 (m, 3H), 3.84 (s, 3H), 3.43-3.37 (m, 1H), 2.84-2.83 (m, 2H), 2.71-2.69 (m, 2H), 2.31 (s, 3H); **<sup>13</sup>C NMR** (75 MHz, CDCl<sub>3</sub>): δ 201.5, 152.1 (d,  $J = 121.8$  Hz), 146.0



(d,  $J = 5.2$  Hz), 139.8, 136.4, 132.5 (d,  $J = 3.4$  Hz), 129.3, 127.3, 124.7 (d,  $J = 1.5$  Hz), 116.7 (d,  $J = 2.6$  Hz), 113.2, 56.2, 49.0, 42.3, 41.5, 21.0;  $^{19}\text{F}$  NMR (282 MHz,  $\text{CDCl}_3$ ):  $-136.0$ ; IR (neat): 2960, 1723, 1492, 1093, 1016, 831  $\text{cm}^{-1}$ ;  $[\alpha]_{\text{D}}^{20} = +63.8$  ( $c = 0.5$ , EtOH); HRMS (ESI)  $m/z$  calcd. for  $\text{C}_{18}\text{H}_{19}\text{O}_2\text{NaF}$  ( $\text{M}+\text{Na}$ ) $^+$ : 309.1267, found 309.1273.

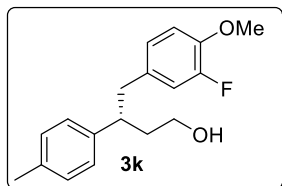

(*R*)-4-(3-fluoro-4-methoxyphenyl)-3-(*p*-tolyl)butan-1-ol

General procedure B was followed using sodium borohydride (6 mg, 0.15 mmol) and aldehyde **2k** (29 mg, 0.10 mmol). The crude mixture was purified by silica gel flash chromatography (1:3 EtOAc:hexanes) to afford **3k** as a colorless oil (27 mg, 94% yield),  $R_f = 0.20$  (1:2 EtOAc:hexanes).  $^1\text{H}$  NMR (300 MHz,  $\text{CDCl}_3$ ):  $\delta$  7.08 (d,  $J = 3.0$  Hz, 2H), 7.02-6.99 (m, 2H), 6.82-6.71 (m, 3H), 3.83 (s, 3H), 3.50-3.44 (m, 2H), 2.97-2.87 (m, 2H), 2.82-2.79 (m, 1H), 2.31 (s, 3H), 1.95-1.82 (m, 2H), 1.13 (brs, 1H);  $^{13}\text{C}$  NMR (75 MHz,  $\text{CDCl}_3$ ):  $\delta$  152.0 (d,  $J = 121.5$  Hz), 145.6 (d,  $J = 5.2$  Hz), 140.8, 135.9, 133.5 (d,  $J = 3.0$  Hz), 129.2, 127.5, 124.6 (d,  $J = 1.5$  Hz), 116.7 (d,  $J = 9.0$  Hz), 113.1 (d,  $J = 1.1$  Hz), 61.0, 56.2, 44.0, 42.8, 38.2, 21.0;  $^{19}\text{F}$  NMR (282 MHz,  $\text{CDCl}_3$ ):  $-136.4$ ; IR (neat): 3338, 2929, 1516, 1273, 1124, 1029, 815  $\text{cm}^{-1}$ ;  $[\alpha]_{\text{D}}^{20} = +69.6$  ( $c = 1.0$ , EtOH); HRMS (ESI)  $m/z$  calcd. for  $\text{C}_{18}\text{H}_{21}\text{O}_2\text{FNa}$  ( $\text{M}+\text{Na}$ ) $^+$ : 311.1423, found 311.1423.

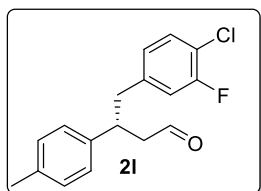

(*R*)-4-(4-chloro-3-fluorophenyl)-3-(*p*-tolyl)butanal

General procedure A was followed using 4-chloro-3-fluorophenylboronic acid (157 mg, 0.90 mmol) and 3-(*p*-tolyl)but-3-en-1-ol (**1a**, 49 mg, 0.30 mmol). The crude mixture was purified by silica gel flash chromatography (1:12 EtOAc:hexanes) to afford **2l** as a colorless oil (54 mg, 62% yield, 4:96 er),  $R_f = 0.30$  (1:4 EtOAc:hexanes).  $^1\text{H}$  NMR (300 MHz,  $\text{CDCl}_3$ ):  $\delta$  9.64 (m, 1H), 7.24-7.19 (m, 1H), 7.09-7.07 (m, 2H), 7.00-6.97 (m, 2H), 6.81-6.72 (m, 2H), 3.43-3.36 (m, 1H), 2.87-2.73 (m, 4H), 2.30 (s, 3H);  $^{13}\text{C}$  NMR (75 MHz,  $\text{CDCl}_3$ ):  $\delta$  201.2, 157.8 (d,  $J = 123.4$  Hz), 140.4 (d,  $J = 3.0$  Hz), 139.2, 136.6, 130.2, 129.4, 127.3, 125.6, 118.5, 117.2 (d,  $J = 10.5$  Hz), 49.2, 42.4, 41.2, 21.0;  $^{19}\text{F}$  NMR (282 MHz,  $\text{CDCl}_3$ ):  $-116.4$ ; IR (neat): 2924, 1723, 1491, 1156, 1063, 817  $\text{cm}^{-1}$ ;  $[\alpha]_{\text{D}}^{20} = +74.6$  ( $c = 0.5$ , EtOH); HRMS (ESI)  $m/z$  calcd. for  $\text{C}_{17}\text{H}_{16}\text{ONaClF}$  ( $\text{M}+\text{Na}$ ) $^+$ : 313.0771, found 313.0787.

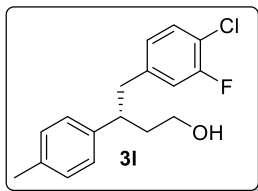

(*R*)-4-(4-chloro-3-fluorophenyl)-3-(*p*-tolyl)butan-1-ol

General procedure B was followed using sodium borohydride (6 mg, 0.15 mmol) and aldehyde **2l** (29 mg, 0.10 mmol). The crude mixture was purified by silica gel flash chromatography (1:3 EtOAc:hexanes) to afford **3l** as a colorless oil (28 mg, 97% yield),  $R_f = 0.20$  (1:2 EtOAc:hexanes).  $^1\text{H NMR}$  (300 MHz,  $\text{CDCl}_3$ ):  $\delta$  7.22-7.16 (m, 1H), 7.08 (d,  $J = 4.5$  Hz, 2H), 7.00 (d,  $J = 4.5$  Hz, 2H), 6.81-6.72 (m, 2H), 3.53-3.42 (m, 2H), 2.96-2.90 (m, 1H), 2.86-2.83 (m, 2H), 2.31 (s, 3H), 1.95-1.82 (m, 2H), 1.22 (brs, 1H);  $^{13}\text{C NMR}$  (75 MHz,  $\text{CDCl}_3$ ):  $\delta$  157.6 (d,  $J = 123.4$  Hz), 141.4 (d,  $J = 3.4$  Hz), 140.1, 136.1, 130.0, 129.2, 127.4, 125.5 (d,  $J = 1.5$  Hz), 118.1 (d,  $J = 8.6$  Hz), 117.1 (d,  $J = 10.1$  Hz), 60.8, 43.7, 43.0, 38.3, 21.0;  $^{19}\text{F NMR}$  (282 MHz,  $\text{CDCl}_3$ ): -116.7; **IR** (neat): 3328, 2930, 1580, 1423, 1060, 816  $\text{cm}^{-1}$ ;  $[\alpha]_D^{20} = +137.7$  ( $c = 1.0$ , EtOH); **HRMS** (ESI)  $m/z$  calcd. for  $\text{C}_{17}\text{H}_{18}\text{ONaClF}$  ( $\text{M}+\text{Na}$ ) $^+$ : 315.0928, found 315.0931.

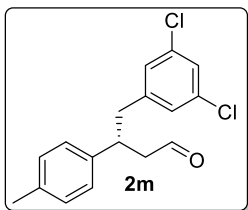

(*R*)-4-(3,5-dichlorophenyl)-3-(*p*-tolyl)butanal

General procedure A was followed using 3,5-dichlorophenylboronic acid (172 mg, 0.90 mmol) and 3-(*p*-tolyl)but-3-en-1-ol (**1a**, 49 mg, 0.30 mmol). The crude mixture was purified by silica gel flash chromatography (1:14 EtOAc:hexanes) to afford **2m** as a colorless oil (37 mg, 40% yield, 2:98 er),  $R_f = 0.40$  (1:4 EtOAc:hexanes).  $^1\text{H NMR}$  (500 MHz,  $\text{CDCl}_3$ ):  $\delta$  9.64 (m, 1H), 7.17 (s, 1H), 7.10 (d,  $J = 5.0$  Hz, 2H), 7.01 (d,  $J = 2.5$  Hz, 2H), 6.91 (s, 2H), 3.44-3.39 (m, 1H), 2.88-2.69 (m, 4H), 2.31 (s, 3H);  $^{13}\text{C NMR}$  (75 MHz,  $\text{CDCl}_3$ ):  $\delta$  201.1, 142.8, 139.0, 136.7, 134.6, 129.4, 127.6, 127.3, 126.6, 49.0, 42.5, 41.0, 21.0; **IR** (neat): 2929, 1723, 1567, 1430, 797  $\text{cm}^{-1}$ ;  $[\alpha]_D^{20} = +51.9$  ( $c = 0.32$ , EtOH); **HRMS** (ESI)  $m/z$  calcd. for  $\text{C}_{17}\text{H}_{16}\text{ONaCl}_2$  ( $\text{M}+\text{Na}$ ) $^+$ : 329.0476, found 329.0464.

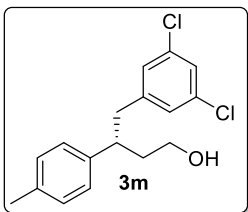

(*R*)-4-(3,5-dichlorophenyl)-3-(*p*-tolyl)butan-1-ol

General procedure B was followed using sodium borohydride (6 mg, 0.15 mmol) and aldehyde **2m** (31 mg, 0.10 mmol). The crude mixture was purified by silica gel flash chromatography (1:3 EtOAc:hexanes) to afford **3m** as a colorless oil (28 mg, 90% yield),  $R_f = 0.20$  (1:2 EtOAc:hexanes). **<sup>1</sup>H NMR** (300 MHz, CDCl<sub>3</sub>):  $\delta$  7.14 (s, 1H), 7.09 (d,  $J = 5.0$  Hz, 2H), 7.00 (d,  $J = 5.0$  Hz, 2H), 6.91 (m, 2H), 3.54-3.52 (m, 1H), 3.45-3.43 (m, 1H), 2.95-2.92 (m, 1H), 2.83 (d,  $J = 5.0$  Hz, 2H), 2.31 (s, 3H), 1.94-1.91 (m, 1H), 1.87-1.81 (m, 1H), 1.11 (brs, 1H); **<sup>13</sup>C NMR** (75 MHz, CDCl<sub>3</sub>):  $\delta$  143.7, 140.0, 136.2, 134.4, 129.3, 127.6, 127.4, 126.2, 60.8, 43.6, 43.2, 38.1, 21.0; **IR** (neat): 3322, 2925, 1589, 1430, 1043, 796 cm<sup>-1</sup>;  $[\alpha]_D^{20} = +69.2$  (c = 0.5, EtOH); **HRMS** (ESI)  $m/z$  calcd. for C<sub>17</sub>H<sub>18</sub>ONaCl<sub>2</sub> (M+Na)<sup>+</sup>: 331.0632, found 331.0640.

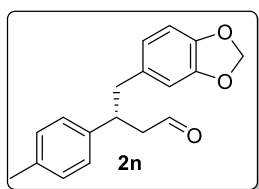

(*R*)-4-(benzo[*d*][1,3]dioxol-5-yl)-3-(*p*-tolyl)butanal

General procedure A was followed using 3,4-(methylenedioxy)phenylboronic acid (149 mg, 0.90 mmol) and 3-(*p*-tolyl)but-3-en-1-ol (**1a**, 49 mg, 0.30 mmol). The crude mixture was purified by silica gel flash chromatography (1:10 EtOAc:hexanes) to afford **2n** as a colorless oil (35 mg, 41% yield, 7.5:92.5 er),  $R_f = 0.25$  (1:4 EtOAc:hexanes). **<sup>1</sup>H NMR** (300 MHz, CDCl<sub>3</sub>):  $\delta$  9.58 (m, 1H), 7.10-7.03 (m, 4H), 6.69-6.66 (m, 1H), 6.57-6.52 (m, 2H), 5.90 (s, 2H), 3.43-3.36 (m, 1H), 2.85-2.68 (m, 4H), 2.31 (s, 3H); **<sup>13</sup>C NMR** (75 MHz, CDCl<sub>3</sub>):  $\delta$  201.7, 147.5, 146.0, 140.1, 136.3, 133.2, 129.3, 127.3, 122.2, 109.5, 108.0, 100.8, 49.0, 43.1, 41.8, 21.0; **IR** (neat): 2920, 1721, 1489, 1249, 1038 cm<sup>-1</sup>;  $[\alpha]_D^{20} = +57.8$  (c = 0.5, EtOH); **HRMS** (ESI)  $m/z$  calcd. for C<sub>18</sub>H<sub>18</sub>O<sub>3</sub>Na (M+Na)<sup>+</sup>: 305.1154, found 305.1160.

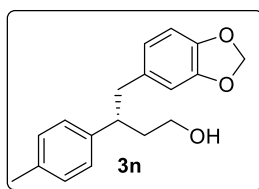

(*R*)-4-(benzo[*d*][1,3]dioxol-5-yl)-3-(*p*-tolyl)butan-1-ol

General procedure B was followed using sodium borohydride (6 mg, 0.15 mmol) and aldehyde **2n** (28 mg, 0.10 mmol). The crude mixture was purified by silica gel flash chromatography (1:3 EtOAc:hexanes) to afford **3n** as a colorless oil (26 mg, 91% yield),  $R_f = 0.20$  (1:2 EtOAc:hexanes). **<sup>1</sup>H NMR** (300 MHz, CDCl<sub>3</sub>):  $\delta$  7.11-7.02 (m, 4H), 6.66 (d,  $J = 4.5$  Hz, 1H), 6.57-6.56 (m, 1H), 6.50 (d,  $J = 4.5$  Hz, 1H), 5.90 (s, 2H), 3.54-3.42 (m, 2H), 2.90-2.74 (m, 3H), 2.32 (s, 3H), 1.98-1.77 (m,

2H), 1.07 (brs, 1H);  $^{13}\text{C NMR}$  (75 MHz,  $\text{CDCl}_3$ ):  $\delta$  147.3, 145.6, 141.2, 135.8, 134.3, 129.2, 127.5, 122.0, 109.5, 107.9, 100.7, 61.2, 44.2, 43.6, 38.2, 21.0; **IR** (neat): 3333, 2923, 1488, 1430, 1245, 1039, 814  $\text{cm}^{-1}$ ;  $[\alpha]_{\text{D}}^{20} = +71.1$  ( $c = 0.5$ , EtOH); **HRMS** (ESI)  $m/z$  calcd. for  $\text{C}_{18}\text{H}_{20}\text{O}_3\text{Na}$  ( $\text{M}+\text{Na}$ ) $^+$ : 307.1310, found 307.1314.

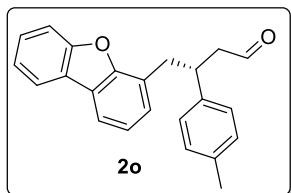

(*R*)-4-(dibenzo[*b,d*]furan-4-yl)-3-(*p*-tolyl)butanal

General procedure A was followed using dibenzo[*b,d*]furan-4-ylboronic acid (191 mg, 0.90 mmol) and 3-(*p*-tolyl)but-3-en-1-ol (**1a**, 49 mg, 0.30 mmol). The crude mixture was purified by silica gel flash chromatography (1:8 EtOAc:hexanes) to afford **2o** as a colorless oil (51 mg, 52% yield, 7:93 er),  $R_f = 0.25$  (1:4 EtOAc:hexanes).  $^1\text{H NMR}$  (300 MHz,  $\text{CDCl}_3$ ):  $\delta$  9.60 (m, 1H), 7.98-7.95 (m, 1H), 7.84-7.80 (m, 1H), 7.64-7.61 (m, 1H), 7.53-7.46 (m, 1H), 7.40-7.34 (m, 1H), 7.28-7.10 (m, 6H), 3.85-3.76 (m, 1H), 3.32-3.30 (m, 2H), 2.91-2.72 (m, 2H), 2.33 (s, 3H);  $^{13}\text{C NMR}$  (75 MHz,  $\text{CDCl}_3$ ):  $\delta$  201.8, 156.0, 154.9, 140.2, 136.3, 129.3, 128.2, 127.3, 127.0, 123.4, 122.7, 120.7, 118.9, 111.7, 48.9, 40.2, 37.5, 21.0; **IR** (neat): 1722, 1451, 1184, 754  $\text{cm}^{-1}$ ;  $[\alpha]_{\text{D}}^{20} = +69.0$  ( $c = 1.0$ , EtOH); **HRMS** (ESI)  $m/z$  calcd. for  $\text{C}_{23}\text{H}_{20}\text{O}_2\text{Na}$  ( $\text{M}+\text{Na}$ ) $^+$ : 351.1361, found 351.1363.

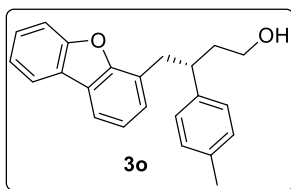

(*R*)-4-(dibenzo[*b,d*]furan-4-yl)-3-(*p*-tolyl)butan-1-ol

General procedure B was followed using sodium borohydride (6 mg, 0.15 mmol) and the aldehyde **2o** (33 mg, 0.1 mmol). The crude mixture was purified by silica gel flash chromatography with hexane/EtOAc = 3:1 as eluent to afford **3o** (30 mg, 90% yield) as a colorless oil.  $R_f = 0.2$  (1:2 EtOAc:hexanes);  $^1\text{H NMR}$  (300 MHz,  $\text{CDCl}_3$ , ppm):  $\delta$  7.95-7.92 (m, 1H), 7.78-7.76 (m, 1H), 7.61-7.58 (m, 1H), 7.49-7.43 (m, 1H), 7.36-7.31 (m, 1H), 7.21-7.07 (m, 6H), 3.56-3.46 (m, 2H), 3.33-3.17 (m, 3H), 2.30 (s, 3H), 2.05-1.93 (m, 2H), 1.11 (brs, 1H);  $^{13}\text{C NMR}$  (75 MHz,  $\text{CDCl}_3$ , ppm):  $\delta$  156.0, 154.9, 141.2, 135.8, 129.1, 128.1, 127.4, 126.9, 124.5, 122.5, 120.6, 118.4, 111.7, 61.2, 42.5, 38.2, 37.7, 21.0; **IR** (neat) 3340, 2925, 1450, 1422, 1180, 1044  $\text{cm}^{-1}$ ;  $[\alpha]_{\text{D}}^{20} = +69.6$  ( $c = 0.5$ , EtOH); **HRMS** (ESI) Calcd. for  $\text{C}_{23}\text{H}_{22}\text{O}_2\text{Na}$  ( $\text{M}+\text{Na}$ ) $^+$ : 353.1527. Found 353.1524.

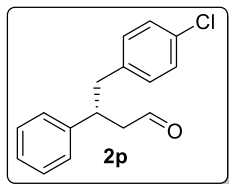

(R)-4-(4-chlorophenyl)-3-phenylbutanal

General procedure A was followed using 4-chlorophenylboronic acid (140 mg, 0.90 mmol) and 3-phenylbut-3-en-1-ol (**1p**, 44 mg, 0.30 mmol). The crude mixture was purified by silica gel flash chromatography (1:15 EtOAc:hexanes) to afford **2p** as a colorless oil (48 mg, 62% yield, 4.5:95.5 er),  $R_f = 0.40$  (1:4 EtOAc:hexanes). **<sup>1</sup>H NMR** (300 MHz, CDCl<sub>3</sub>): δ 9.64 (t,  $J = 3.0$  Hz, 1H), 7.31-7.11 (m, 7H), 6.97-6.93 (m, 2H), 3.51-3.41 (m, 1H), 2.90 (d,  $J = 3.0$  Hz, 2H), 2.80-2.76 (m, 2H); **<sup>13</sup>C NMR** (75 MHz, CDCl<sub>3</sub>): δ 201.3, 142.6, 137.7, 132.0, 130.5, 128.6, 128.4, 127.5, 126.8, 49.0, 42.5, 41.8; **IR** (neat): 2926, 1723, 1492, 1093, 1015, 701 cm<sup>-1</sup>;  $[\alpha]_D^{20} = +65.3$  (c = 0.34, EtOH); **HRMS** (ESI)  $m/z$  calcd. for C<sub>16</sub>H<sub>15</sub>ONaCl (M+Na)<sup>+</sup>: 281.0709, found 281.0709.

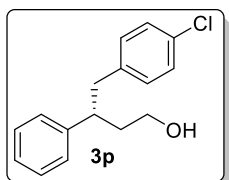

(R)-4-(4-chlorophenyl)-3-phenylbutan-1-ol

General procedure B was followed using sodium borohydride (6 mg, 0.15 mmol) and aldehyde **2p** (26 mg, 0.10 mmol). The crude mixture was purified by silica gel flash chromatography (1:3 EtOAc:hexanes) to afford **3p** as a colorless oil (25 mg, 97% yield),  $R_f = 0.20$  (1:2 EtOAc:hexanes). **<sup>1</sup>H NMR** (300 MHz, CDCl<sub>3</sub>): δ 7.29-7.09 (m, 7H), 6.96-6.92 (m, 2H), 3.56-3.37 (m, 2H), 2.97-2.85 (m, 3H), 1.97-1.86 (m, 2H), 1.27 (brs, 1H); **<sup>13</sup>C NMR** (75 MHz, CDCl<sub>3</sub>): δ 143.7, 138.6, 131.6, 130.4, 128.4, 128.1, 127.6, 126.4, 60.8, 44.3, 43.0, 38.2; **IR** (neat): 3326, 2931, 1491, 1092, 1015, 700 cm<sup>-1</sup>;  $[\alpha]_D^{20} = +23.8$  (c = 0.5, EtOH); **HRMS** (ESI)  $m/z$  calcd. for C<sub>16</sub>H<sub>17</sub>ONaCl (M+Na)<sup>+</sup>: 283.0866, found 283.0869.

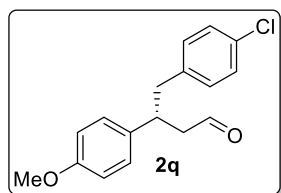

(R)-4-(4-chlorophenyl)-3-(4-methoxyphenyl)butanal

General procedure A was followed using 4-chlorophenylboronic acid (140 mg, 0.90 mmol) and 3-(4-methoxyphenyl)but-3-en-1-ol (**1q**, 53 mg, 0.30 mmol). The crude mixture was purified by silica gel flash chromatography (1:8 EtOAc:hexanes) to afford **2q** as a colorless oil (50 mg, 58% yield,

3.5:96.5 er),  $R_f = 0.30$  (1:4 EtOAc:hexanes).  $^1\text{H NMR}$  (300 MHz,  $\text{CDCl}_3$ ):  $\delta$  9.62 (s, 1H), 7.19-7.16 (m, 2H), 7.03-7.01 (m, 2H), 6.94-6.92 (m, 2H), 6.82-6.79 (m, 2H), 3.77 (s, 3H), 3.42-3.38 (m, 1H), 2.89-2.81 (m, 2H), 2.77-2.68 (m, 2H);  $^{13}\text{C NMR}$  (125 MHz,  $\text{CDCl}_3$ ):  $\delta$  201.4, 158.4, 137.8, 134.6, 132.0, 130.5, 128.4, 128.3, 114.0, 55.2, 49.2, 42.7, 41.1; **IR** (neat): 1721, 1610, 1512, 1247, 829  $\text{cm}^{-1}$ ;  $[\alpha]_{\text{D}}^{20} = +48.6$  ( $c = 1.0$ , EtOH); **HRMS** (ESI)  $m/z$  calcd. for  $\text{C}_{17}\text{H}_{17}\text{O}_2\text{NaCl}$  ( $\text{M}+\text{Na}$ ) $^+$ : 311.0815, found 311.0816.

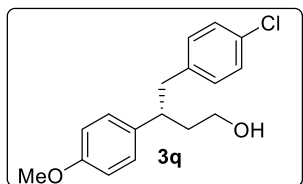

(*R*)-4-(4-chlorophenyl)-3-(4-methoxyphenyl)butan-1-ol

General procedure B was followed using sodium borohydride (6 mg, 0.15 mmol) and aldehyde **2q** (29 mg, 0.10 mmol). The crude mixture was purified by silica gel flash chromatography (1:3 EtOAc:hexanes) to afford **3q** as a colorless oil (28 mg, 96% yield),  $R_f = 0.20$  (1:2 EtOAc:hexanes).  $^1\text{H NMR}$  (500 MHz,  $\text{CDCl}_3$ ):  $\delta$  7.16-7.14 (m, 2H), 7.02-7.00 (m, 2H), 6.92 (d,  $J = 5.0$  Hz, 2H), 6.82-6.79 (m, 2H), 3.78 (s, 3H), 3.55-3.51 (m, 1H), 3.47-3.41 (m, 1H), 2.92-2.82 (m, 3H), 1.95-1.93 (m, 1H), 1.85-1.82 (m, 1H), 1.06 (t,  $J = 5.0$  Hz, 1H);  $^{13}\text{C NMR}$  (125 MHz,  $\text{CDCl}_3$ ):  $\delta$  158.1, 138.8, 135.6, 131.6, 130.5, 128.5, 128.2, 113.8, 61.0, 55.2, 43.6, 43.3, 38.4; **IR** (neat): 3339, 2932, 1512, 1247, 1035, 829  $\text{cm}^{-1}$ ;  $[\alpha]_{\text{D}}^{20} = +89.4$  ( $c = 1.0$ , EtOH); **HRMS** (ESI)  $m/z$  calcd. for  $\text{C}_{17}\text{H}_{19}\text{O}_2\text{NaCl}$  ( $\text{M}+\text{Na}$ ) $^+$ : 313.0971, found 313.0971.

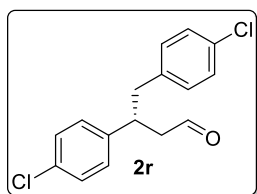

(*R*)-3,4-bis(4-chlorophenyl)butanal

General procedure A was followed using 4-chlorophenylboronic acid (140 mg, 0.90 mmol) and 3-(4-chlorophenyl)but-3-en-1-ol (**1r**, 55 mg, 0.30 mmol). The crude mixture was purified by silica gel flash chromatography (1:15 EtOAc:hexanes) to afford **2r** as a colorless oil (49 mg, 56% yield, 8.5:91.5 er),  $R_f = 0.40$  (1:4 EtOAc:hexanes).  $^1\text{H NMR}$  (300 MHz,  $\text{CDCl}_3$ ):  $\delta$  9.63 (m, 1H), 7.25-7.16 (m, 4H), 7.05-7.01 (m, 2H), 6.94-6.90 (m, 2H), 3.49-3.39 (m, 1H), 2.93-2.74 (m, 4H);  $^{13}\text{C NMR}$  (125 MHz,  $\text{CDCl}_3$ ):  $\delta$  200.6, 141.2, 137.3, 132.6, 132.3, 130.5, 128.9, 128.8, 128.5, 49.0, 42.3, 41.1; **IR** (neat): 2925, 1723, 1492, 1408, 1093, 1014, 828  $\text{cm}^{-1}$ ;  $[\alpha]_{\text{D}}^{20} = +35.7$  ( $c = 0.5$ , EtOH); **HRMS** (ESI)  $m/z$  calcd. for  $\text{C}_{16}\text{H}_{14}\text{ONaCl}_2$  ( $\text{M}+\text{Na}$ ) $^+$ : 315.0319, found 315.0324.

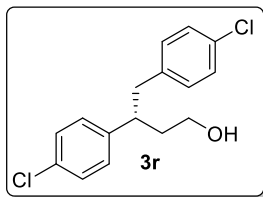

(*R*)-3,4-bis(4-chlorophenyl)butan-1-ol

General procedure B was followed using sodium borohydride (6 mg, 0.15 mmol) and aldehyde **2r** (29 mg, 0.10 mmol). The crude mixture was purified by silica gel flash chromatography (1:3 EtOAc:hexanes) to afford **3r** as a colorless oil (27 mg, 93% yield),  $R_f = 0.20$  (1:2 EtOAc:hexanes).  $^1\text{H NMR}$  (300 MHz,  $\text{CDCl}_3$ ):  $\delta$  7.23-7.20 (m, 2H), 7.16-7.14 (m, 2H), 7.03-7.00 (m, 2H), 6.92-6.89 (m, 2H), 3.56-3.53 (m, 1H), 3.43-3.40 (m, 1H), 2.98-2.94 (m, 1H), 2.91-2.87 (m, 1H), 2.82-2.79 (m, 1H), 1.97-1.94 (m, 1H), 1.84-1.82 (m, 1H), 1.13 (brs, 1H);  $^{13}\text{C NMR}$  (75 MHz,  $\text{CDCl}_3$ ):  $\delta$  142.1, 138.2, 132.1, 131.9, 130.4, 129.0, 128.6, 128.3, 60.6, 43.7, 42.9, 38.2; **IR** (neat): 3335, 2933, 1491, 1408, 1093, 1014, 826  $\text{cm}^{-1}$ ;  $[\alpha]_D^{20} = +82.0$  ( $c = 1.0$ , EtOH); **HRMS** (ESI)  $m/z$  calcd. for  $\text{C}_{16}\text{H}_{16}\text{ONaCl}_2$  ( $\text{M}+\text{Na}$ ) $^+$ : 317.0476, found 317.0491.

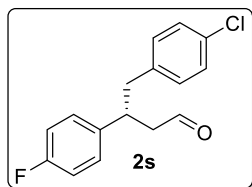

(*R*)-4-(4-chlorophenyl)-3-(4-fluorophenyl)butanal

General procedure A was followed using 4-chlorophenylboronic acid (140 mg, 0.90 mmol) and 3-(4-fluorophenyl)but-3-en-1-ol (**1s**, 50 mg, 0.30 mmol). The crude mixture was purified by silica gel flash chromatography (1:15 EtOAc:hexanes) to afford **2s** as a colorless oil (52 mg, 63% yield, 90:10 er),  $R_f = 0.40$  (1:4 EtOAc:hexanes).  $^1\text{H NMR}$  (500 MHz,  $\text{CDCl}_3$ ):  $\delta$  9.64 (m, 1H), 7.19-7.17 (m, 2H), 7.07-7.04 (m, 2H), 6.97-6.91 (m, 4H), 3.48-3.42 (m, 1H), 2.92-2.88 (m, 1H), 2.84-2.80 (m, 1H), 2.77-2.75 (m, 2H);  $^{13}\text{C NMR}$  (75 MHz,  $\text{CDCl}_3$ ):  $\delta$  200.8, 161.6 (d,  $J = 120.0$  Hz), 138.3, 137.4, 132.2, 130.5, 129.0 (d,  $J = 3.8$  Hz), 128.4, 115.4 (d,  $J = 11.2$  Hz), 49.2, 42.5, 41.0;  $^{19}\text{F NMR}$  (282 MHz,  $\text{CDCl}_3$ ): -116.3; **IR** (neat): 2925, 1723, 1510, 1224, 1095, 834  $\text{cm}^{-1}$ ;  $[\alpha]_D^{20} = +40.8$  ( $c = 1.0$ , EtOH); **HRMS** (ESI)  $m/z$  calcd. for  $\text{C}_{16}\text{H}_{14}\text{ONaClF}$  ( $\text{M}+\text{Na}$ ) $^+$ : 299.0615, found 299.0614.

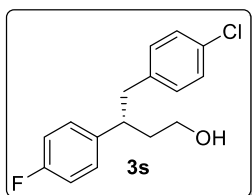

(*R*)-4-(4-chlorophenyl)-3-(4-fluorophenyl)butan-1-ol

General procedure B was followed using sodium borohydride (6 mg, 0.15 mmol) and aldehyde **2s**

(28 mg, 0.10 mmol). The crude mixture was purified by silica gel flash chromatography (1:3 EtOAc:hexanes) to afford **3s** as a colorless oil (26 mg, 92% yield),  $R_f = 0.20$  (1:2 EtOAc:hexanes).  $^1\text{H NMR}$  (500 MHz,  $\text{CDCl}_3$ ):  $\delta$  7.16-7.14 (m, 2H), 7.05-7.02 (m, 2H), 6.96-6.89 (m, 4H), 3.55-3.52 (m, 1H), 3.42-3.40 (m, 1H), 2.99-2.97 (m, 1H), 2.90-2.86 (m, 1H), 2.82-2.77 (m, 1H), 1.98-1.94 (m, 1H), 1.85-1.81 (m, 1H), 1.19 (brs, 1H);  $^{13}\text{C NMR}$  (75 MHz,  $\text{CDCl}_3$ ):  $\delta$  161.4 (d,  $J = 121.5$  Hz), 139.2 (d,  $J = 1.5$  Hz), 138.4, 131.7, 130.4, 129.0 (d,  $J = 3.8$  Hz), 128.2, 115.2 (d,  $J = 10.5$  Hz), 60.7, 43.6, 43.2, 38.3;  $^{19}\text{F NMR}$  (282 MHz,  $\text{CDCl}_3$ ): -117.0; **IR** (neat): 3359, 2935, 1509, 1223, 1094, 833  $\text{cm}^{-1}$ ;  $[\alpha]_{\text{D}}^{20} = +65.9$  ( $c = 1.0$ , EtOH); **HRMS** (ESI)  $m/z$  calcd. for  $\text{C}_{16}\text{H}_{16}\text{ONaClF}$  ( $\text{M}+\text{Na}$ ) $^+$ : 301.0771, found 301.0767.

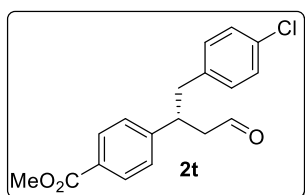

methyl (*R*)-4-(1-(4-chlorophenyl)-4-oxobutan-2-yl)benzoate

General procedure A was followed using 4-chlorophenylboronic acid (140 mg, 0.90 mmol) and methyl 4-(4-hydroxybut-1-en-2-yl)benzoate (**1t**, 62 mg, 0.30 mmol). The crude mixture was purified by silica gel flash chromatography (1:8 EtOAc:hexanes) to afford **2t** as a colorless oil (41 mg, 43% yield, 6.5:93.5 er),  $R_f = 0.30$  (1:4 EtOAc:hexanes).  $^1\text{H NMR}$  (500 MHz,  $\text{CDCl}_3$ ):  $\delta$  9.65 (m, 1H), 7.94-7.92 (m, 2H), 7.18-7.16 (m, 4H), 6.92-6.90 (m, 2H), 3.89 (s, 3H), 3.53-3.49 (m, 1H), 2.95-2.91 (m, 1H), 2.87-2.80 (m, 3H);  $^{13}\text{C NMR}$  (75 MHz,  $\text{CDCl}_3$ ):  $\delta$  200.4, 166.8, 148.0, 137.2, 132.3, 130.4, 129.9, 128.8, 128.5, 127.6, 52.1, 48.9, 42.1, 41.6; **IR** (neat): 2949, 1720, 1282, 1116, 710  $\text{cm}^{-1}$ ;  $[\alpha]_{\text{D}}^{20} = +88.6$  ( $c = 0.5$ , EtOH); **HRMS** (ESI)  $m/z$  calcd. for  $\text{C}_{18}\text{H}_{17}\text{O}_3\text{NaCl}$  ( $\text{M}+\text{Na}$ ) $^+$ : 339.0764, found 339.0761.

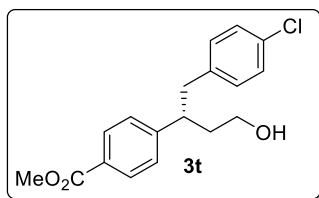

methyl (*R*)-4-(1-(4-chlorophenyl)-4-hydroxybutan-2-yl)benzoate

General procedure B was followed using sodium borohydride (6 mg, 0.15 mmol) and aldehyde **2t** (32 mg, 0.10 mmol). The crude mixture was purified by silica gel flash chromatography (1:3 EtOAc:hexanes) to afford **3t** as a colorless oil (29 mg, 91% yield),  $R_f = 0.20$  (1:2 EtOAc:hexanes).  $^1\text{H NMR}$  (500 MHz,  $\text{CDCl}_3$ ):  $\delta$  7.92 (d,  $J = 5.0$  Hz, 2H), 7.17-7.13 (m, 4H), 6.90 (d,  $J = 5.0$  Hz, 2H), 3.89 (s, 3H), 3.55-3.52 (m, 1H), 3.44-3.40 (m, 1H), 3.20-3.15 (m, 1H), 2.95-2.91 (m, 1H), 2.86-2.80



(m, 1H), 2.01-1.98 (m, 1H), 1.91-1.89 (m, 1H), 1.19 (brs, 1H);  $^{13}\text{C NMR}$  (75 MHz,  $\text{CDCl}_3$ ):  $\delta$  167.0, 149.2, 138.1, 131.8, 130.4, 129.8, 128.5, 128.3, 127.8, 60.6, 52.0, 44.3, 42.7, 38.1; **IR** (neat): 3400, 2935, 1719, 1492, 1282, 709  $\text{cm}^{-1}$ ;  $[\alpha]_{\text{D}}^{20} = +90.3$  ( $c = 1.0$ , EtOH); **HRMS** (ESI)  $m/z$  calcd. for  $\text{C}_{18}\text{H}_{19}\text{O}_3\text{NaCl}$  ( $\text{M}+\text{Na}$ ) $^+$ : 341.0920, found 341.0921.

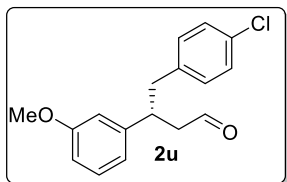

(*R*)-4-(4-chlorophenyl)-3-(3-methoxyphenyl)butanal

General procedure A was followed using 4-chlorophenylboronic acid (140 mg, 0.90 mmol) and 3-(3-methoxyphenyl)but-3-en-1-ol (**1u**, 53 mg, 0.30 mmol). The crude mixture was purified by silica gel flash chromatography (1:12 EtOAc:hexanes) to afford **2u** as a colorless oil (44 mg, 51% yield, 4:96 er),  $R_f = 0.35$  (1:4 EtOAc:hexanes).  $^1\text{H NMR}$  (500 MHz,  $\text{CDCl}_3$ ):  $\delta$  9.63 (m, 1H), 7.21-7.18 (m, 3H), 6.97-6.95 (m, 2H), 6.75-6.70 (m, 2H), 6.65 (s, 1H), 3.77 (s, 3H), 3.43-3.40 (m, 1H), 2.88 (d,  $J = 5.0$  Hz, 2H), 2.80-2.69 (m, 2H);  $^{13}\text{C NMR}$  (125 MHz,  $\text{CDCl}_3$ ):  $\delta$  201.2, 159.8, 144.4, 137.7, 132.1, 130.5, 129.6, 128.4, 119.8, 113.6, 111.9, 55.2, 49.0, 42.4, 41.8; **IR** (neat): 2925, 1722, 1600, 1491, 1262, 1093, 701  $\text{cm}^{-1}$ ;  $[\alpha]_{\text{D}}^{20} = +47.8$  ( $c = 1.0$ , EtOH); **HRMS** (ESI)  $m/z$  calcd. for  $\text{C}_{17}\text{H}_{17}\text{O}_2\text{NaCl}$  ( $\text{M}+\text{Na}$ ) $^+$ : 311.0815, found 311.0821.

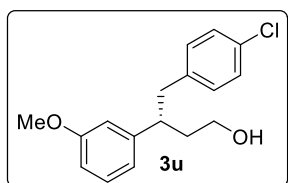

(*R*)-4-(4-chlorophenyl)-3-(3-methoxyphenyl)butan-1-ol

General procedure B was followed using sodium borohydride (6 mg, 0.15 mmol) and aldehyde **2u** (29 mg, 0.10 mmol). The crude mixture was purified by silica gel flash chromatography (1:3 EtOAc:hexanes) to afford **3u** as a colorless oil (29 mg, 98% yield),  $R_f = 0.20$  (1:2 EtOAc:hexanes).  $^1\text{H NMR}$  (500 MHz,  $\text{CDCl}_3$ ):  $\delta$  7.21-7.14 (m, 3H), 6.96-6.94 (m, 2H), 6.72-6.69 (m, 2H), 6.65 (s, 1H), 3.76 (s, 3H), 3.54-3.51 (m, 1H), 3.46-3.44 (m, 1H), 2.95-2.90 (m, 1H), 2.87-2.84 (m, 2H), 1.95-1.85 (m, 2H), 1.12 (brs, 1H);  $^{13}\text{C NMR}$  (125 MHz,  $\text{CDCl}_3$ ):  $\delta$  159.6, 145.5, 138.7, 131.6, 130.4, 129.4, 128.2, 120.1, 113.7, 111.4, 60.9, 55.1, 44.4, 43.0, 38.2; **IR** (neat): 3340, 2931, 1608, 1490, 1259, 1042, 702  $\text{cm}^{-1}$ ;  $[\alpha]_{\text{D}}^{20} = +70.4$  ( $c = 1.0$ , EtOH); **HRMS** (ESI)  $m/z$  calcd. for  $\text{C}_{17}\text{H}_{19}\text{O}_2\text{NaCl}$  ( $\text{M}+\text{Na}$ ) $^+$ : 313.0971, found 313.0972.

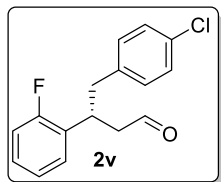

(*R*)-4-(4-chlorophenyl)-3-(2-fluorophenyl)butanal

General procedure A was followed using 4-chlorophenylboronic acid (140 mg, 0.90 mmol) and 3-(2-fluorophenyl)but-3-en-1-ol (**1v**, 50 mg, 0.30 mmol). The crude mixture was purified by silica gel flash chromatography (1:15 EtOAc:hexanes) to afford **2v** as a colorless oil (15 mg, 18% yield, 20:80 er),  $R_f = 0.40$  (1:4 EtOAc:hexanes). **<sup>1</sup>H NMR** (300 MHz, CDCl<sub>3</sub>):  $\delta$  9.65 (m, 1H), 7.22-7.15 (m, 3H), 7.10-6.97 (m, 5H), 3.79-3.69 (m, 1H), 2.94 (d,  $J = 4.5$  Hz, 2H), 2.83 (d,  $J = 3.0$  Hz, 2H); **<sup>13</sup>C NMR** (75 MHz, CDCl<sub>3</sub>):  $\delta$  200.8, 160.8 (d,  $J = 121.9$  Hz), 137.5, 132.1, 130.4, 129.4, 129.1 (d,  $J = 2.6$  Hz), 128.4 (d,  $J = 4.5$  Hz), 128.3, 124.2 (d,  $J = 1.9$  Hz), 115.7 (d,  $J = 11.2$  Hz), 47.8, 40.6, 35.8; **<sup>19</sup>F NMR** (282 MHz, CDCl<sub>3</sub>): -117.8; **IR** (neat): 1724, 1491, 1228, 1095, 757 cm<sup>-1</sup>;  $[\alpha]_D^{20} = +33.0$  ( $c = 0.16$ , EtOH); **HRMS** (ESI)  $m/z$  calcd. for C<sub>16</sub>H<sub>14</sub>ONaClF (M+Na)<sup>+</sup>: 299.0615, found 299.0611.

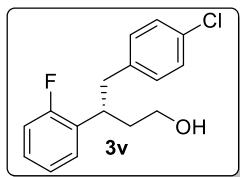

(*R*)-4-(4-chlorophenyl)-3-(2-fluorophenyl)butan-1-ol

General procedure B was followed using sodium borohydride (3 mg, 0.075 mmol) and aldehyde **2v** (14 mg, 0.05 mmol). The crude mixture was purified by silica gel flash chromatography (1:3 EtOAc:hexanes) to afford **3v** as a colorless oil (13 mg, 90% yield),  $R_f = 0.20$  (1:2 EtOAc:hexanes). **<sup>1</sup>H NMR** (300 MHz, CDCl<sub>3</sub>):  $\delta$  7.18-7.07 (m, 5H), 7.05-6.94 (m, 3H), 3.56-3.31 (m, 3H), 2.93 (d,  $J = 3.0$  Hz, 2H), 2.04-1.89 (m, 2H), 1.21 (brs, 1H); **<sup>13</sup>C NMR** (75 MHz, CDCl<sub>3</sub>):  $\delta$  161.1 (d,  $J = 121.5$  Hz), 133.4, 131.8, 130.3, 130.1, 129.0 (d,  $J = 2.6$  Hz), 128.2, 127.9 (d,  $J = 4.5$  Hz), 124.1 (d,  $J = 1.9$  Hz), 115.5 (d,  $J = 11.2$  Hz), 60.9, 41.4, 37.6, 37.2; **<sup>19</sup>F NMR** (282 MHz, CDCl<sub>3</sub>): -118.4; **IR** (neat) 3336, 2933, 1491, 1225, 1094, 757 cm<sup>-1</sup>;  $[\alpha]_D^{20} = +43.0$  ( $c = 0.22$ , EtOH); **HRMS** (ESI)  $m/z$  calcd. for C<sub>16</sub>H<sub>16</sub>ONaClF (M+Na)<sup>+</sup>: 301.0771, found 301.0778.

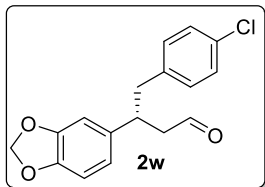

(*R*)-3-(benzo[d][1,3]dioxol-5-yl)-4-(4-chlorophenyl)butanal

General procedure A was followed using 4-chlorophenylboronic acid (140 mg, 0.90 mmol) and

3-(benzo[*d*][1,3]dioxol-5-yl)but-3-en-1-ol (**1w**, 58 mg, 0.30 mmol). The crude mixture was purified by silica gel flash chromatography (1:14 EtOAc:hexanes) to afford **2w** as a colorless oil (33 mg, 36% yield, 8.5:91.5 er),  $R_f = 0.40$  (1:4 EtOAc:hexanes).  $^1\text{H NMR}$  (500 MHz,  $\text{CDCl}_3$ ):  $\delta$  9.62 (m, 1H), 7.20-7.17 (m, 2H), 6.97-6.94 (m, 2H), 6.69-6.68 (m, 1H), 6.63-6.62 (m, 1H), 6.54-6.50 (m, 1H), 5.92 (m, 2H), 3.40-3.34 (m, 1H), 2.88-2.80 (m, 2H), 2.75-2.66 (m, 2H);  $^{13}\text{C NMR}$  (75 MHz,  $\text{CDCl}_3$ ):  $\delta$  201.2, 147.8, 146.3, 137.7, 136.5, 132.1, 130.5, 128.4, 120.7, 108.3, 107.6, 101.0, 49.3, 42.6, 41.6; **IR** (neat): 1719, 1490, 1246, 1039, 668  $\text{cm}^{-1}$ ;  $[\alpha]_{\text{D}}^{20} = +72.3$  ( $c = 0.5$ , EtOH); **HRMS** (ESI)  $m/z$  calcd. for  $\text{C}_{17}\text{H}_{15}\text{O}_3\text{NaCl}$  ( $\text{M}+\text{Na}$ ) $^+$ : 325.0607, found 325.0603.

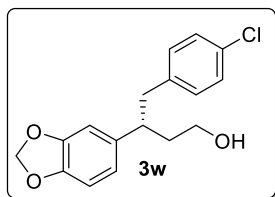

(*R*)-3-(benzo[*d*][1,3]dioxol-5-yl)-4-(4-chlorophenyl)butan-1-ol

General procedure B was followed using sodium borohydride (6 mg, 0.15 mmol) and aldehyde **2w** (30 mg, 0.10 mmol). The crude mixture was purified by silica gel flash chromatography (1:3 EtOAc:hexanes) to afford **3w** as a colorless oil (28 mg, 93% yield),  $R_f = 0.20$  (1:2 EtOAc:hexanes).  $^1\text{H NMR}$  (500 MHz,  $\text{CDCl}_3$ ):  $\delta$  7.18-7.15 (m, 2H), 6.96-6.92 (m, 2H), 6.66-6.63 (m, 2H), 6.53-6.49 (m, 1H), 5.93-5.91 (m, 2H), 3.55-3.51 (m, 1H), 3.48-3.43 (m, 1H), 2.91-2.79 (m, 3H), 1.93-1.87 (m, 1H), 1.84-1.74 (m, 1H), 1.12 (brs, 1H);  $^{13}\text{C NMR}$  (75 MHz,  $\text{CDCl}_3$ ):  $\delta$  147.8, 146.0, 138.6, 137.6, 131.6, 130.4, 128.2, 120.9, 108.2, 107.6, 100.8, 60.9, 44.2, 43.2, 38.5; **IR** (neat): 3361, 2922, 1488, 1245, 1040  $\text{cm}^{-1}$ ;  $[\alpha]_{\text{D}}^{20} = +94.9$  ( $c = 1.0$ , EtOH); **HRMS** (ESI)  $m/z$  calcd. for  $\text{C}_{17}\text{H}_{17}\text{O}_3\text{NaCl}$  ( $\text{M}+\text{Na}$ ) $^+$ : 327.0764, found 327.0757.

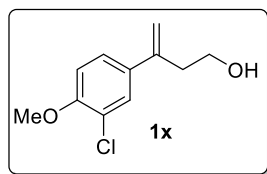

3-(3-chloro-4-methoxyphenyl)but-3-en-1-ol

Prepared according to literature procedure<sup>4b</sup> using alcohol **S4** (378 mg, 2.50 mmol, 1.0 equiv) and (3-chloro-4-methoxyphenyl)boronic acid (930 mg, 5.0 mmol, 2.0 equiv). The crude mixture was purified by silica gel flash chromatography (1:4 EtOAc:hexanes) to afford **1x** as a colorless oil (414 mg, 78% yield),  $R_f = 0.20$  (1:2 EtOAc:hexanes).  $^1\text{H NMR}$  (500 MHz,  $\text{CDCl}_3$ ):  $\delta$  7.44 (s, 1H), 7.29-7.7.27 (m, 1H), 6.88 (d,  $J = 2.5$  Hz, 1H), 5.35 (s, 1H), 5.11 (s, 1H), 3.90 (s, 3H), 3.74-3.70 (m, 2H), 2.75-2.72 (m, 2H), 1.43 (t,  $J = 5.0$  Hz, 1H);  $^{13}\text{C NMR}$  (125 MHz,  $\text{CDCl}_3$ ):  $\delta$  154.5, 143.1, 133.8,

128.0, 125.4, 122.4, 114.0, 111.8, 60.9, 56.2, 38.4; **IR** (neat): 3340, 2929, 1502, 1289, 1064  $\text{cm}^{-1}$ ; **HRMS** (ESI)  $m/z$  calcd. for  $\text{C}_{11}\text{H}_{13}\text{O}_2\text{NaCl}$  ( $\text{M}+\text{Na}$ ) $^+$ : 235.0502, found 235.0508.

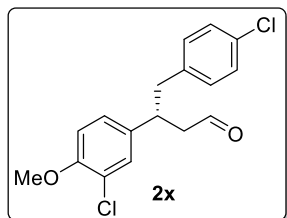

(*R*)-3-(3-chloro-4-methoxyphenyl)-4-(4-chlorophenyl)butanal

General procedure A was followed using 4-chlorophenylboronic acid (140 mg, 0.90 mmol) and 3-(3-chloro-4-methoxyphenyl)but-3-en-1-ol (**1x**, 64 mg, 0.30 mmol). The crude mixture was purified by silica gel flash chromatography (1:8 EtOAc:hexanes) to afford **2x** as a colorless oil (46 mg, 48% yield, 96:4 er),  $R_f = 0.20$  (1:4 EtOAc:hexanes).  **$^1\text{H NMR}$**  (500 MHz,  $\text{CDCl}_3$ ):  $\delta$  9.62 (s, 1H), 7.19-7.15 (m, 3H), 6.94-6.90 (m, 3H), 6.79 (d,  $J = 5.0$  Hz, 1H), 3.85 (s, 3H), 3.40-3.35 (m, 1H), 2.88-2.78 (m, 2H), 2.72 (d,  $J = 2.5$  Hz, 1H);  **$^{13}\text{C NMR}$**  (125 MHz,  $\text{CDCl}_3$ ):  $\delta$  200.7, 153.7, 137.4, 135.8, 132.2, 130.4, 128.9, 128.4, 127.0, 122.5, 112.0, 56.1, 49.1, 42.4, 40.7; **IR** (neat): 2929, 1719, 1493, 1256, 1063, 813  $\text{cm}^{-1}$ ;  $[\alpha]_D^{20} = +78.0$  ( $c = 0.3$ , EtOH); **HRMS** (ESI)  $m/z$  calcd. for  $\text{C}_{17}\text{H}_{16}\text{O}_2\text{NaCl}_2$  ( $\text{M}+\text{Na}$ ) $^+$ : 345.0425, found 345.0434.

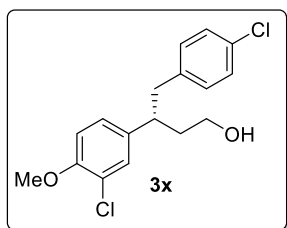

(*R*)-3-(3-chloro-4-methoxyphenyl)-4-(4-chlorophenyl)butan-1-ol

General procedure B was followed using sodium borohydride (6 mg, 0.15 mmol) and aldehyde **2x** (32 mg, 0.10 mmol). The crude mixture was purified by silica gel flash chromatography (1:3 EtOAc:hexanes) to afford **3x** as a colorless oil (31 mg, 95% yield),  $R_f = 0.20$  (1:2 EtOAc:hexanes).  **$^1\text{H NMR}$**  (500 MHz,  $\text{CDCl}_3$ ):  $\delta$  7.17-7.13 (m, 3H), 6.93-6.88 (m, 3H), 6.81-6.78 (m, 1H), 3.87 (s, 3H), 3.56-3.53 (m, 1H), 3.44-3.40 (m, 1H), 2.92-2.88 (m, 1H), 2.85-2.83 (m, 1H), 2.81-2.79 (m, 1H), 1.95-1.92 (m, 1H), 1.82-1.79 (m, 1H), 1.12 (brs, 1H);  **$^{13}\text{C NMR}$**  (75 MHz,  $\text{CDCl}_3$ ):  $\delta$  153.4, 138.4, 136.8, 131.7, 130.4, 129.0, 128.2, 127.1, 122.3, 111.9, 60.7, 56.1, 43.3, 43.0, 38.2; **IR** (neat): 3357, 2926, 1493, 1258, 1064  $\text{cm}^{-1}$ ;  $[\alpha]_D^{20} = +77.0$  ( $c = 0.21$ , EtOH); **HRMS** (ESI)  $m/z$  calcd. for  $\text{C}_{17}\text{H}_{18}\text{O}_2\text{NaCl}_2$  ( $\text{M}+\text{Na}$ ) $^+$ : 347.0582, found 347.0594.

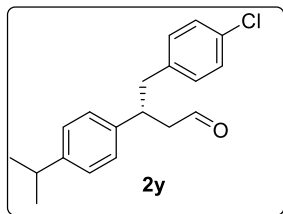

(*R*)-4-(4-chlorophenyl)-3-(4-isopropylphenyl)butanal

General procedure A was followed using 4-chlorophenylboronic acid (140 mg, 0.90 mmol) and 3-(4-isopropylphenyl)but-3-en-1-ol (**1y**, 57 mg, 0.30 mmol). The crude mixture was purified by silica gel flash chromatography (1:15 EtOAc:hexanes) to afford **2y** as a colorless oil (47 mg, 52% yield, 5:95 er),  $R_f = 0.40$  (1:4 EtOAc:hexanes). **<sup>1</sup>H NMR** (500 MHz, CDCl<sub>3</sub>): δ 9.61 (s, 1H), 7.19 (d,  $J = 5.0$  Hz, 2H), 7.14 (d,  $J = 2.5$  Hz, 2H), 7.05 (d,  $J = 5.0$  Hz, 2H), 6.96 (d,  $J = 2.5$  Hz, 2H), 3.45-3.39 (m, 1H), 2.90-2.86 (m, 3H), 2.75-2.71 (m, 2H), 1.23 (d,  $J = 5.0$  Hz, 6H); **<sup>13</sup>C NMR** (75 MHz, CDCl<sub>3</sub>): δ 201.5, 147.4, 140.0, 137.9, 132.0, 130.5, 128.4, 127.3, 126.6, 49.0, 42.5, 41.4, 33.6, 24.0; **IR** (neat): 2960, 1723, 1492, 1093, 1016, 831 cm<sup>-1</sup>;  $[\alpha]_D^{20} = +74.2$  (c = 0.9, EtOH); **HRMS** (ESI)  $m/z$  calcd. for C<sub>19</sub>H<sub>21</sub>ONaCl (M+Na)<sup>+</sup>: 323.1179, found 323.1179.

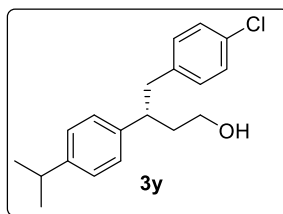

(*R*)-4-(4-chlorophenyl)-3-(4-isopropylphenyl)butan-1-ol

General procedure B was followed using sodium borohydride (6 mg, 0.15 mmol) and aldehyde **2y** (30 mg, 0.10 mmol). The crude mixture was purified by silica gel flash chromatography (1:3 EtOAc:hexanes) to afford **3y** as a colorless oil (29 mg, 96% yield),  $R_f = 0.20$  (1:2 EtOAc:hexanes). **<sup>1</sup>H NMR** (500 MHz, CDCl<sub>3</sub>): δ 7.10 (d,  $J = 5.0$  Hz, 2H), 7.06 (d,  $J = 5.0$  Hz, 2H), 6.97 (d,  $J = 5.0$  Hz, 2H), 6.89 (d,  $J = 5.0$  Hz, 2H), 3.45-3.39 (m, 1H), 3.37-3.34 (m, 1H), 2.87-2.76 (m, 4H), 1.86-1.83 (m, 1H), 1.78-1.75 (m, 1H), 1.16 (d,  $J = 5.0$  Hz, 6H), 1.08 (brs, 1H); **<sup>13</sup>C NMR** (75 MHz, CDCl<sub>3</sub>): δ 147.0, 141.0, 138.9, 131.6, 130.4, 128.1, 127.4, 126.5, 61.0, 43.9, 43.1, 38.1, 33.6, 24.0; **IR** (neat): 3317, 2958, 1491, 1092, 1015, 829 cm<sup>-1</sup>;  $[\alpha]_D^{20} = +79.2$  (c = 1.0, EtOH); **HRMS** (ESI)  $m/z$  calcd. for C<sub>19</sub>H<sub>23</sub>ONaCl (M+Na)<sup>+</sup>: 325.1335, found 325.1338.

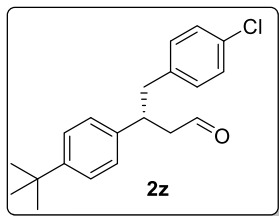

(*R*)-3-(4-(*tert*-butyl)phenyl)-4-(4-chlorophenyl)butanal

General procedure A was followed using 4-chlorophenylboronic acid (140 mg, 0.90 mmol) and 3-(4-(*tert*-butyl)phenyl)but-3-en-1-ol (**1z**, 61 mg, 0.30 mmol). The crude mixture was purified by silica gel flash chromatography (1:15 EtOAc:hexanes) to afford **2z** as a colorless oil (38 mg, 40% yield, 5:95 er),  $R_f = 0.40$  (1:4 EtOAc:hexanes).  $^1\text{H NMR}$  (500 MHz,  $\text{CDCl}_3$ ):  $\delta$  9.60 (m, 1H), 7.30-7.27 (m, 2H), 7.20-7.17 (m, 2H), 7.07-7.04 (m, 2H), 6.98-6.95 (m, 2H), 3.46-3.40 (m, 1H), 2.91-2.83 (m, 2H), 2.74-2.70 (m, 2H), 1.30 (s, 9H);  $^{13}\text{C NMR}$  (75 MHz,  $\text{CDCl}_3$ ):  $\delta$  201.5, 149.7, 139.6, 137.9, 132.0, 130.5, 128.4, 127.0, 125.5, 48.9, 42.5, 41.3, 34.4, 31.3; **IR** (neat): 2962, 1723, 1492, 1093, 1015, 831  $\text{cm}^{-1}$ ;  $[\alpha]_D^{20} = +71.6$  ( $c = 1.0$ , EtOH); **HRMS** (ESI)  $m/z$  calcd. for  $\text{C}_{20}\text{H}_{23}\text{ONaCl}$  ( $\text{M}+\text{Na}$ ) $^+$ : 337.1335, found 337.1334.

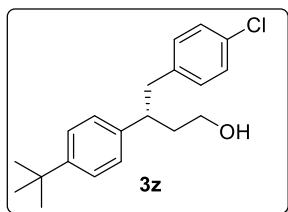

(*R*)-3-(4-(*tert*-butyl)phenyl)-4-(4-chlorophenyl)butan-1-ol

General procedure B was followed using sodium borohydride (6 mg, 0.15 mmol) and aldehyde **2z** (32 mg, 0.10 mmol). The crude mixture was purified by silica gel flash chromatography (1:3 EtOAc:hexanes) to afford **3z** as a colorless oil (30 mg, 93% yield),  $R_f = 0.20$  (1:2 EtOAc:hexanes).  $^1\text{H NMR}$  (500 MHz,  $\text{CDCl}_3$ ):  $\delta$  7.30-7.26 (m, 2H), 7.18-7.16 (m, 2H), 7.06-7.04 (m, 2H), 6.98-6.96 (m, 2H), 3.54-3.49 (m, 1H), 3.44-3.39 (m, 1H), 2.94-2.83 (m, 3H), 1.93-1.90 (m, 1H), 1.84-1.82 (m, 1H), 1.31 (s, 9H), 1.13 (brs, 1H);  $^{13}\text{C NMR}$  (75 MHz,  $\text{CDCl}_3$ ):  $\delta$  149.2, 140.7, 138.9, 131.6, 130.5, 128.2, 127.2, 125.3, 61.0, 43.8, 43.1, 38.0, 34.4, 31.4; **IR** (neat): 3321, 2961, 1492, 1092, 1015, 834  $\text{cm}^{-1}$ ;  $[\alpha]_D^{20} = +72.3$  ( $c = 1.0$ , EtOH); **HRMS** (ESI)  $m/z$  calcd. for  $\text{C}_{20}\text{H}_{25}\text{ONaCl}$  ( $\text{M}+\text{Na}$ ) $^+$ : 339.1492, found 339.1487.

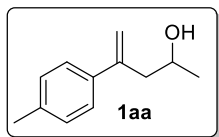

4-(*p*-tolyl)pent-4-en-2-ol

$^1\text{H NMR}$  (300 MHz,  $\text{CDCl}_3$ ):  $\delta$  7.32 (d,  $J = 3.0$  Hz, 2H), 7.16 (d,  $J = 4.5$  Hz, 2H), 5.38 (d,  $J = 1.5$  Hz,

1H), 5.12 (d,  $J = 1.5$  Hz, 1H), 3.88-3.84 (m, 1H), 2.76-2.69 (m, 1H), 2.61-2.54 (m, 1H), 2.36 (s, 3H), 1.76 (brs, 1H), 1.23-1.20 (m, 3H);  $^{13}\text{C}$  NMR (75 MHz,  $\text{CDCl}_3$ ):  $\delta$  145.2, 137.5, 129.1, 126.0, 114.4, 65.7, 45.5, 22.8, 21.0; **IR** (neat): 3365, 2967, 2926, 1513, 1121, 1078, 824  $\text{cm}^{-1}$ ; **HRMS** (ESI)  $m/z$  calcd. for  $\text{C}_{12}\text{H}_{16}\text{ONa}$  ( $\text{M}+\text{Na}$ ) $^+$ : 199.1099, found 199.1103.

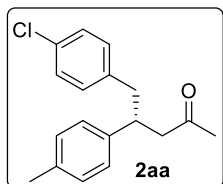

(*R*)-5-(4-chlorophenyl)-4-(*p*-tolyl)pentan-2-one

General procedure A was followed using 4-chlorophenylboronic acid (140 mg, 0.90 mmol) and 4-(*p*-tolyl)pent-4-en-2-ol (**1aa**, 53 mg, 0.30 mmol). The crude mixture was purified by silica gel flash chromatography (1:15 EtOAc:hexanes) to afford **2aa** as a colorless oil (35 mg, 41% yield, 95.5:4.5 er),  $R_f = 0.40$  (1:4 EtOAc:hexanes).  $^1\text{H}$  NMR (500 MHz,  $\text{CDCl}_3$ ):  $\delta$  7.16 (d,  $J = 5.0$  Hz, 2H), 7.05 (d,  $J = 5.0$  Hz, 2H), 6.98 (d,  $J = 5.0$  Hz, 2H), 6.94 (d,  $J = 5.0$  Hz, 2H), 3.40-3.34 (m, 1H), 2.85-2.71 (m, 4H), 2.29 (s, 3H), 2.00 (s, 3H);  $^{13}\text{C}$  NMR (75 MHz,  $\text{CDCl}_3$ ):  $\delta$  207.5, 140.2, 138.2, 136.0, 131.8, 130.5, 129.1, 128.2, 127.4, 49.3, 42.4, 42.3, 30.6, 21.0; **IR** (neat): 2922, 1713, 1491, 1356, 1092, 1015, 819  $\text{cm}^{-1}$ ;  $[\alpha]_D^{20} = +88.5$  ( $c = 0.5$ , EtOH); **HRMS** (ESI)  $m/z$  calcd. for  $\text{C}_{18}\text{H}_{19}\text{ONaCl}$  ( $\text{M}+\text{Na}$ ) $^+$ : 309.1022, found 309.1027.

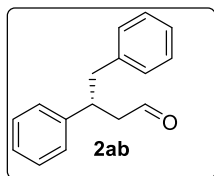

(*R*)-3,4-diphenylbutanal

General procedure A was followed using phenylboronic acid (110 mg, 0.90 mmol) and 3-phenylbut-3-en-1-ol (**1p**, 44 mg, 0.30 mmol). The crude mixture was purified by silica gel flash chromatography (1:15 EtOAc:hexanes) to afford **2ab** as a colorless oil (34 mg, 51% yield, 5:95 er),  $R_f = 0.40$  (1:4 EtOAc:hexanes).  $^1\text{H}$  NMR (300 MHz,  $\text{CDCl}_3$ ):  $\delta$  9.59 (t,  $J = 3.0$  Hz, 1H), 7.32-7.16 (m, 8H), 7.07 (d,  $J = 3.0$  Hz, 2H), 3.55-3.45 (m, 1H), 3.01-2.83 (m, 2H), 2.78-2.69 (m, 2H);  $^{13}\text{C}$  NMR (75 MHz,  $\text{CDCl}_3$ ):  $\delta$  201.6, 143.2, 139.2, 129.2, 128.6, 128.3, 127.5, 126.7, 126.3, 48.9, 43.3, 41.2; **IR** (neat): 2923, 1722, 1495, 1453, 761, 699  $\text{cm}^{-1}$ ;  $[\alpha]_D^{20} = +57.4$  ( $c = 0.5$ , EtOH) or  $[\alpha]_D^{20} = +49.6$  ( $c = 0.5$ ,  $\text{CHCl}_3$ ); **HRMS** (ESI)  $m/z$  calcd. for  $\text{C}_{16}\text{H}_{16}\text{ONa}$  ( $\text{M}+\text{Na}$ ) $^+$ : 247.1099, found 247.1104.

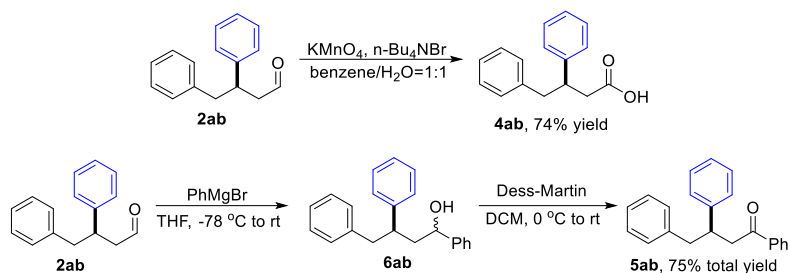

According to the literature,<sup>5a</sup> aldehyde **2ab** was converted into the reported 3,4-diphenyl butanoic acid **4ab**. The measured optical rotation:  $[\alpha]_{\text{D}}^{20} = +51.4$  ( $c = 0.7$ , benzene) was compared to the reported optical rotation value for (*R*)-3,4-diphenyl butanoic acid:  $[\alpha]_{\text{D}}^{22} = +41.4$  ( $c = 2.62$ , benzene, 65% ee).<sup>5b</sup> Aldehyde **2ab** was assigned with the absolute configuration of (*R*). In addition, we also converted aldehyde **2ab** to known 1,3,4-triphenyl-1-butanone **5ab** and measured its optical rotation:  $[\alpha]_{\text{D}}^{20} = +30.5$  ( $c = 0.5$ ,  $\text{CHCl}_3$ , 90% ee). Compared to the known optical rotation value for (*S*)-1,3,4-triphenyl-1-butanone:  $[\alpha]_{\text{D}}^{20} = -41.9$  ( $c = 0.5$ ,  $\text{CHCl}_3$ , 98% ee),<sup>5c</sup> configuration of aldehyde **2ab** was confirmed as (*R*).

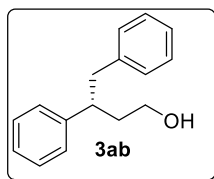

(*R*)-3,4-diphenylbutan-1-ol

General procedure B was followed using sodium borohydride (6 mg, 0.15 mmol) and aldehyde **2ab** (22 mg, 0.10 mmol). The crude mixture was purified by silica gel flash chromatography (1:4 EtOAc:hexanes) to afford **3ab** as a colorless oil (22 mg, 97% yield),  $R_f = 0.20$  (1:2 EtOAc:hexanes). **<sup>1</sup>H NMR** (500 MHz,  $\text{CDCl}_3$ ):  $\delta$  7.28-7.25 (m, 3H), 7.22-7.13 (m, 5H), 7.04 (d,  $J = 1.5$  Hz, 2H), 3.55-3.50 (m, 1H), 3.46-3.40 (m, 1H), 3.01-2.99 (m, 1H), 2.92-2.89 (m, 2H), 2.00-1.96 (m, 1H), 1.89-1.86 (m, 1H), 1.04 (t,  $J = 5.0$  Hz, 1H); **<sup>13</sup>C NMR** (75 MHz,  $\text{CDCl}_3$ ):  $\delta$  144.3, 140.3, 129.1, 128.4, 128.1, 127.7, 126.3, 125.9, 61.1, 44.5, 43.8, 38.2; **IR** (neat): 2923, 1722, 1495, 1453, 761, 699  $\text{cm}^{-1}$ ;  $[\alpha]_{\text{D}}^{20} = +60.0$  ( $c = 0.21$ , EtOH); **HRMS** (ESI)  $m/z$  calcd. for  $\text{C}_{16}\text{H}_{18}\text{ONa}$  ( $\text{M}+\text{Na}$ )<sup>+</sup>: 249.1255, found 249.1261.

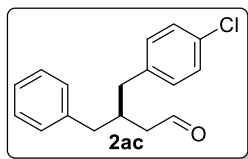

(*S*)-3-benzyl-4-(4-chlorophenyl)butanal

General procedure A was followed using 4-chlorophenylboronic acid (140 mg, 0.90 mmol) and 3-benzylbut-3-en-1-ol (**1ac**, 49 mg, 0.30 mmol). The crude mixture was purified by silica gel flash



chromatography (1:15 EtOAc:hexanes) to afford **2ac** as a colorless oil (20 mg, 24% yield, 30.5:69.5 er),  $R_f = 0.40$  (1:4 EtOAc:hexanes).  $^1\text{H NMR}$  (300 MHz,  $\text{CDCl}_3$ ):  $\delta$  9.59 (t,  $J = 3.0$  Hz, 1H), 7.32-7.07 (m, 9H), 2.71-2.55 (m, 5H), 2.32 (d,  $J = 1.5$  Hz, 2H);  $^{13}\text{C NMR}$  (75 MHz,  $\text{CDCl}_3$ ):  $\delta$  201.9, 139.5, 138.3, 132.1, 130.5, 129.2, 128.6, 128.5, 126.4, 47.0, 40.3, 39.7, 37.2; **IR** (neat): 2922, 2361, 1721, 1492, 1088, 702  $\text{cm}^{-1}$ ;  $[\alpha]_{\text{D}}^{20} = -8.3$  ( $c = 0.31$ , EtOH); **HRMS** (ESI)  $m/z$  calcd. for  $\text{C}_{17}\text{H}_{17}\text{ONaCl}$  ( $\text{M}+\text{Na}$ ) $^+$ : 295.0866, found 295.0852.

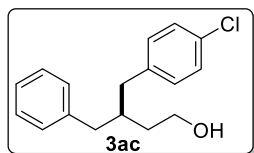

(*S*)-3-benzyl-4-(4-chlorophenyl)butan-1-ol

General procedure B was followed using sodium borohydride (3 mg, 0.075 mmol) and aldehyde **2ac** (14 mg, 0.05 mmol). The crude mixture was purified by silica gel flash chromatography (1:4 EtOAc:hexanes) to afford **3ac** as a colorless oil (13 mg, 92% yield),  $R_f = 0.20$  (1:2 EtOAc:hexanes).  $^1\text{H NMR}$  (300 MHz,  $\text{CDCl}_3$ ):  $\delta$  7.30-7.19 (m, 5H), 7.15-7.06 (m, 4H), 3.67-3.60 (m, 2H), 2.59-2.54 (m, 4H), 2.13-2.09 (m, 1H), 1.57-1.51 (m, 2H), 1.02 (t,  $J = 3.0$  Hz, 1H);  $^{13}\text{C NMR}$  (75 MHz,  $\text{CDCl}_3$ ):  $\delta$  140.8, 139.5, 131.9, 130.7, 129.4, 128.6, 128.6, 126.2, 61.1, 40.7, 40.1, 38.9, 36.4; **IR** (neat): 3362, 2925, 1089, 742, 700  $\text{cm}^{-1}$ ;  $[\alpha]_{\text{D}}^{20} = -5.0$  ( $c = 0.1$ , EtOH); **HRMS** (ESI)  $m/z$  calcd. for  $\text{C}_{17}\text{H}_{19}\text{ONaCl}$  ( $\text{M}+\text{Na}$ ) $^+$ : 297.1022, found 297.1021.

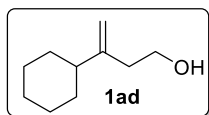

3-cyclohexylbut-3-en-1-ol

$^1\text{H NMR}$  (300 MHz,  $\text{CDCl}_3$ ):  $\delta$  4.84 (s, 1H), 4.75 (s, 1H), 3.71-3.65 (m, 2H), 2.31-2.27 (m, 2H), 1.77-1.65 (m, 7H), 1.32-1.06 (m, 5H);  $^{13}\text{C NMR}$  (75 MHz,  $\text{CDCl}_3$ ):  $\delta$  151.4, 109.4, 60.8, 44.0, 38.0, 32.4, 26.7, 26.3; **IR** (neat): 3318, 2922, 1639, 1448, 1044, 887  $\text{cm}^{-1}$ ; **HRMS** (ESI)  $m/z$  calcd. for  $\text{C}_{10}\text{H}_{19}\text{O}$  ( $\text{M}+\text{H}$ ) $^+$ : 155.1436, found 155.1441.

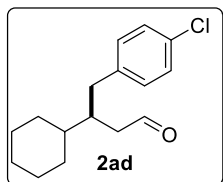

(*S*)-4-(4-chlorophenyl)-3-cyclohexylbutanal

General procedure A was followed using 4-chlorophenylboronic acid (140 mg, 0.90 mmol) and 3-cyclohexylbut-3-en-1-ol (**1ad**, 46 mg, 0.30 mmol). The crude mixture was purified by silica gel flash chromatography (1:15 EtOAc:hexanes) to afford **2ad** as a colorless oil (27 mg, 34% yield,

32.5:67.5 er),  $R_f = 0.40$  (1:4 EtOAc:hexanes).  $^1\text{H NMR}$  (500 MHz,  $\text{CDCl}_3$ ):  $\delta$  9.59 (t,  $J = 3.0$  Hz, 1H), 7.24 (d,  $J = 2.5$  Hz, 2H), 7.08 (d,  $J = 2.5$  Hz, 2H), 2.74-2.71 (m, 1H), 2.42-2.38 (m, 2H), 2.28-2.20 (m, 2H), 1.75-1.55 (m, 5H), 1.34-1.03 (m, 6H);  $^{13}\text{C NMR}$  (75 MHz,  $\text{CDCl}_3$ ):  $\delta$  202.8, 139.3, 132.1, 130.7, 128.8, 45.4, 40.8, 40.6, 37.4, 30.5, 29.6, 26.8; **IR** (neat): 2924, 2852, 1730, 1092, 1015, 807  $\text{cm}^{-1}$ ;  $[\alpha]_{\text{D}}^{20} = -2.7$  ( $c = 0.5$ , EtOH) or  $[\alpha]_{\text{D}}^{20} = +1.3$  ( $c = 1.0$ ,  $\text{CHCl}_3$ ); **HRMS** (ESI)  $m/z$  calcd. for  $\text{C}_{16}\text{H}_{21}\text{ONaCl}$  ( $\text{M}+\text{Na}$ ) $^+$ : 287.1179, found 287.1177.

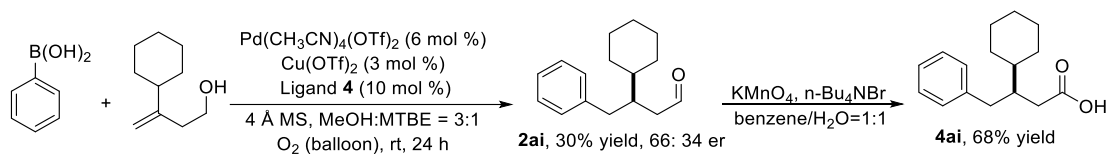

The absolute configuration of aldehydes **2ad** and **2ae** were defined by synthesizing 3-cyclohexyl-4-phenylbutyric acid **4ai**, which has been previously prepared. The measured optical rotation value:  $[\alpha]_{\text{D}}^{20} = +1.7$  ( $c = 0.5$ ,  $\text{CHCl}_3$ , 32% ee) was compared to the reported optical rotation value for (*R*)-3-cyclohexyl-4-phenylbutyric acid:  $[\alpha]_{\text{D}}^{25} = -8.0$  ( $c = 2.3$ ,  $\text{CHCl}_3$ ).<sup>5d</sup> The aldehyde **2ai** was assigned the absolute configuration of (*S*). Thus, aldehyde **2ad** and **2ae** were assigned by analogy as (*S*).

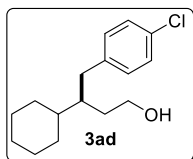

(*S*)-4-(4-chlorophenyl)-3-cyclohexylbutan-1-ol

General procedure B was followed using sodium borohydride (6 mg, 0.15 mmol) and aldehyde **2ad** (26 mg, 0.10 mmol). The crude mixture was purified by silica gel flash chromatography (1:4 EtOAc:hexanes) to afford **3ad** as a colorless oil (25 mg, 92% yield),  $R_f = 0.20$  (1:2 EtOAc:hexanes).  $^1\text{H NMR}$  (500 MHz,  $\text{CDCl}_3$ ):  $\delta$  7.24 (d,  $J = 4.5$  Hz, 2H), 7.08 (d,  $J = 4.5$  Hz, 2H), 3.56-3.55 (m, 2H), 2.66 (q,  $J = 6.0$  Hz, 1H), 2.38 (q,  $J = 6.0$  Hz, 1H), 1.74-1.53 (m, 7H), 1.45-1.07 (m, 8H);  $^{13}\text{C NMR}$  (75 MHz,  $\text{CDCl}_3$ ):  $\delta$  140.3, 131.4, 130.4, 128.3, 61.6, 42.2, 39.9, 37.0, 33.5, 29.5, 29.4, 26.8; **IR** (neat): 3310, 2924, 2851, 1491, 1448, 1093, 1015  $\text{cm}^{-1}$ ;  $[\alpha]_{\text{D}}^{20} = -3.0$  ( $c = 0.5$ , EtOH); **HRMS** (ESI)  $m/z$  calcd. for  $\text{C}_{16}\text{H}_{23}\text{ONaCl}$  ( $\text{M}+\text{Na}$ ) $^+$ : 289.1335, found 289.1326.

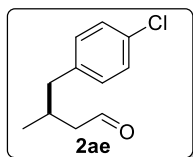

(*S*)-4-(4-chlorophenyl)-3-methylbutanal

General procedure A was followed using 4-chlorophenylboronic acid (140 mg, 0.90 mmol) and

3-methylbut-3-en-1-ol (**1ae**, 30 mg, 0.30 mmol). The crude mixture was purified by silica gel flash chromatography (1:15 EtOAc:hexanes) to afford **2ae** as a colorless oil (31 mg, 52% yield, 51.5:48.5 er),  $R_f = 0.40$  (1:4 EtOAc:hexanes). **<sup>1</sup>H NMR** (500 MHz, CDCl<sub>3</sub>):  $\delta$  9.72 (t,  $J = 3.0$  Hz, 1H), 7.27-7.24 (m, 2H), 7.10-7.07 (m, 2H), 2.62-2.22 (m, 5H), 0.96 (d,  $J = 4.5$  Hz, 3H); **<sup>13</sup>C NMR** (75 MHz, CDCl<sub>3</sub>):  $\delta$  202.2, 138.4, 132.0, 130.5, 128.5, 50.2, 42.4, 30.1, 19.8; **IR** (neat): 2959, 2927, 1724, 1492, 1089, 801 cm<sup>-1</sup>;  $[\alpha]_D^{20} = -1.0$  (c = 0.2, EtOH); **HRMS** (ESI)  $m/z$  calcd. for C<sub>11</sub>H<sub>13</sub>ONaCl (M+Na)<sup>+</sup>: 219.0553, found 219.0542.

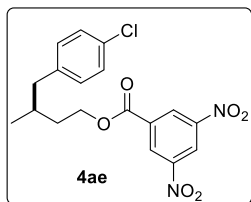

(S)-4-(4-chlorophenyl)-3-methylbutyl 3,5-dinitrobenzoate

**<sup>1</sup>H NMR** (500 MHz, CDCl<sub>3</sub>):  $\delta$  9.21 (s, 1H), 9.12-9.11 (m, 2H), 7.25-7.23 (m, 2H), 7.11-7.08 (m, 2H), 4.55-4.43 (m, 2H), 2.64 (q,  $J = 5.0$  Hz, 1H), 2.52 (q,  $J = 5.0$  Hz, 1H), 1.93-1.89 (m, 2H), 1.66-1.64 (m, 1H), 0.99 (d,  $J = 2.5$  Hz, 3H); **<sup>13</sup>C NMR** (75 MHz, CDCl<sub>3</sub>):  $\delta$  162.4, 148.6, 138.8, 133.9, 131.8, 130.4, 129.3, 128.4, 122.3, 65.3, 42.8, 34.8, 32.1, 19.4; **IR** (neat): 2923, 1730, 1544, 1344, 1278, 721 cm<sup>-1</sup>;  $[\alpha]_D^{20} = -2.0$  (c = 0.2, EtOH); **HRMS** (ESI)  $m/z$  calcd. for C<sub>18</sub>H<sub>17</sub>N<sub>2</sub>O<sub>6</sub>Cl<sub>2</sub>(M+Cl)<sup>-</sup>: 427.0464, found 427.0481.

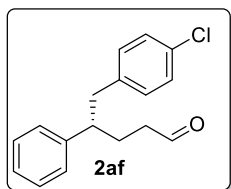

(S)-5-(4-chlorophenyl)-4-phenylpentanal

General procedure A was followed using 4-chlorophenylboronic acid (140 mg, 0.90 mmol) and 4-phenylpent-4-en-1-ol (**1af**, 49 mg, 0.30 mmol). The crude mixture was purified by silica gel flash chromatography (1:15 EtOAc:hexanes) to afford **2af** as a colorless oil (42 mg, 51% yield, 88.5:11.5 er),  $R_f = 0.40$  (1:4 EtOAc:hexanes). **<sup>1</sup>H NMR** (500 MHz, CDCl<sub>3</sub>):  $\delta$  9.62 (m, 1H), 7.28-7.24 (m, 2H), 7.21-7.13 (m, 3H), 7.07-7.04 (m, 2H), 6.94-6.90 (m, 2H), 2.89-2.85 (m, 1H), 2.82-2.77 (m, 2H), 2.28-2.24 (m, 2H), 2.06-2.03 (m, 1H), 1.91-1.87 (m, 1H); **<sup>13</sup>C NMR** (125 MHz, CDCl<sub>3</sub>):  $\delta$  201.9, 143.1, 138.5, 131.8, 130.4, 128.6, 128.2, 127.7, 126.7, 47.2, 43.1, 42.0, 27.7; **IR** (neat): 2926, 2360, 1722, 1492, 1092, 1015, 702 cm<sup>-1</sup>;  $[\alpha]_D^{20} = +54.0$  (c = 0.2, EtOH); **HRMS** (ESI)  $m/z$  calcd. for C<sub>17</sub>H<sub>17</sub>ONaCl (M+Na)<sup>+</sup>: 295.0866, found 295.0868.

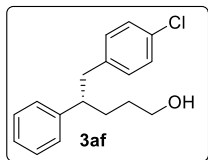

(S)-5-(4-chlorophenyl)-4-phenylpentan-1-ol

General procedure B was followed using sodium borohydride (6 mg, 0.15 mmol) and aldehyde **2af** (27 mg, 0.10 mmol). The crude mixture was purified by silica gel flash chromatography (1:4 EtOAc:hexanes) to afford **3af** as a colorless oil (26 mg, 95% yield),  $R_f = 0.20$  (1:4 EtOAc:hexanes).  $^1\text{H NMR}$  (500 MHz,  $\text{CDCl}_3$ ):  $\delta$  7.26-7.23 (m, 2H), 7.19-7.13 (m, 3H), 7.08-7.06 (m, 2H), 6.93-6.90 (m, 2H), 3.56-3.53 (m, 2H), 2.90-2.74 (m, 3H), 1.80-1.73 (m, 1H), 1.71-1.63 (m, 1H), 1.46-1.38 (m, 2H), 1.13 (t,  $J = 5.0$  Hz, 1H);  $^{13}\text{C NMR}$  (75 MHz,  $\text{CDCl}_3$ ):  $\delta$  144.2, 138.9, 131.5, 130.4, 128.3, 128.1, 127.7, 126.3, 62.9, 47.9, 43.2, 31.7, 30.8; **IR** (neat): 3334, 2935, 1491, 1092, 1091, 1015, 700  $\text{cm}^{-1}$ ;  $[\alpha]_D^{20} = +65.2$  ( $c = 1.0$ , EtOH); **HRMS** (ESI)  $m/z$  calcd. for  $\text{C}_{17}\text{H}_{19}\text{ONaCl}$  ( $\text{M}+\text{Na}$ ) $^+$ : 297.1022, found 297.1021.

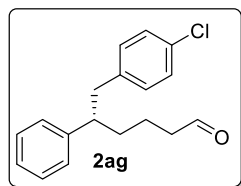

(S)-6-(4-chlorophenyl)-5-phenylhexanal

General procedure A was followed using 4-chlorophenylboronic acid (140 mg, 0.90 mmol) and 5-phenylhex-5-en-1-ol (**1ag**, 53 mg, 0.30 mmol). The crude mixture was purified by silica gel flash chromatography (1:15 EtOAc:hexanes) to afford **2ag** as a colorless oil (40 mg, 46% yield, 81:19 er),  $R_f = 0.40$  (1:4 EtOAc:hexanes).  $^1\text{H NMR}$  (300 MHz,  $\text{CDCl}_3$ ):  $\delta$  9.66 (m, 1H), 7.29-7.24 (m, 2H), 7.21-7.13 (m, 3H), 7.07 (d,  $J = 4.5$  Hz, 2H), 6.92 (d,  $J = 4.5$  Hz, 2H), 2.88-2.72 (m, 3H), 2.34-2.32 (m, 2H), 1.72-1.63 (m, 2H), 1.53-1.42 (m, 2H);  $^{13}\text{C NMR}$  (75 MHz,  $\text{CDCl}_3$ ):  $\delta$  202.4, 143.8, 138.7, 131.5, 130.4, 128.4, 128.1, 127.6, 126.4, 47.9, 43.7, 43.0, 34.9, 20.1; **IR** (neat) 2927, 1723, 1491, 1092, 1015, 701  $\text{cm}^{-1}$ ;  $[\alpha]_D^{20} = +41.6$  ( $c = 0.5$ , EtOH); **HRMS** (ESI) Calcd. for  $\text{C}_{18}\text{H}_{19}\text{ONaCl}$  ( $\text{M}+\text{Na}$ ) $^+$ : 309.1022. Found 309.1025.

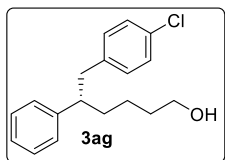

(S)-6-(4-chlorophenyl)-5-phenylhexan-1-ol

General procedure B was followed using sodium borohydride (6 mg, 0.15 mmol) and aldehyde **2ag** (29 mg, 0.10 mmol). The crude mixture was purified by silica gel flash chromatography (1:4

EtOAc:hexanes) to afford **3ag** as a colorless oil (26 mg, 90% yield),  $R_f = 0.20$  (1:2 EtOAc:hexanes).  $^1\text{H NMR}$  (300 MHz,  $\text{CDCl}_3$ ):  $\delta$  7.28-7.25 (m, 2H), 7.23-7.14 (m, 3H), 7.07 (d,  $J = 4.5$  Hz, 2H), 6.92 (d,  $J = 4.5$  Hz, 2H), 3.55-3.53 (m, 2H), 2.91-2.73 (m, 3H), 1.71-1.63 (m, 2H), 1.58-1.41 (m, 2H), 1.26-1.16 (m, 3H);  $^{13}\text{C NMR}$  (75 MHz,  $\text{CDCl}_3$ ):  $\delta$  144.4, 139.0, 131.5, 130.4, 128.3, 128.1, 127.7, 126.2, 62.8, 48.0, 43.1, 35.4, 32.7, 23.7; **IR** (neat): 3352, 2931, 1491, 1092, 1091, 1015,  $700\text{ cm}^{-1}$ ;  $[\alpha]_{\text{D}}^{20} = +34.5$  ( $c = 1.0$ , EtOH); **HRMS** (ESI)  $m/z$  calcd. for  $\text{C}_{18}\text{H}_{21}\text{ONaCl}$  ( $\text{M}+\text{Na}$ ) $^+$ : 311.1179, found 311.1183.

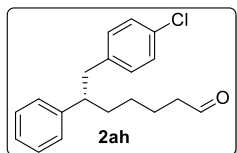

(S)-7-(4-chlorophenyl)-6-phenylheptanal

General procedure A was followed using 4-chlorophenylboronic acid (140 mg, 0.90 mmol) and 6-phenylhept-6-en-1-ol (**1ah**, 57 mg, 0.30 mmol). The crude mixture was purified by silica gel flash chromatography (1:15 EtOAc:hexanes) to afford **2ah** as a colorless oil (38 mg, 42% yield, 22:78 er),  $R_f = 0.40$  (1:4 EtOAc:hexanes).  $^1\text{H NMR}$  (300 MHz,  $\text{CDCl}_3$ ):  $\delta$  9.69 (m, 1H), 7.28-7.23 (m, 2H), 7.20-7.14 (m, 3H), 7.06 (d,  $J = 3.0$  Hz, 2H), 6.91 (d,  $J = 3.0$  Hz, 2H), 2.90-2.70 (m, 3H), 2.35-2.30 (m, 2H), 1.66-1.54 (m, 4H), 1.22-1.13 (m, 2H);  $^{13}\text{C NMR}$  (75 MHz,  $\text{CDCl}_3$ ):  $\delta$  202.5, 144.2, 138.9, 131.5, 130.4, 128.3, 128.1, 127.6, 126.2, 47.8, 43.7, 43.1, 35.3, 27.0, 22.0; **IR** (neat): 2929, 1723, 1492, 1093,  $1015\text{ cm}^{-1}$ ;  $[\alpha]_{\text{D}}^{20} = +39.9$  ( $c = 0.5$ , EtOH); **HRMS** (ESI)  $m/z$  calcd. for  $\text{C}_{19}\text{H}_{21}\text{ONaCl}$  ( $\text{M}+\text{Na}$ ) $^+$ : 323.1179, found 323.1180.

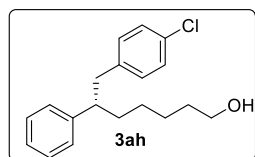

(S)-7-(4-chlorophenyl)-6-phenylheptan-1-ol

General procedure B was followed using sodium borohydride (6 mg, 0.15 mmol) and aldehyde **2ah** (30 mg, 0.10 mmol). The crude mixture was purified by silica gel flash chromatography (1:4 EtOAc:hexanes) to afford **3ah** as a colorless oil (28 mg, 94% yield),  $R_f = 0.20$  (1:2 EtOAc:hexanes).  $^1\text{H NMR}$  (300 MHz,  $\text{CDCl}_3$ ):  $\delta$  7.29-7.23 (m, 2H), 7.21-7.14 (m, 3H), 7.09-7.06 (m, 2H), 6.93-6.90 (m, 2H), 3.59-3.55 (m, 2H), 2.88-2.73 (m, 3H), 1.67-1.63 (m, 2H), 1.50-1.43 (m, 2H), 1.33-1.15 (m, 5H);  $^{13}\text{C NMR}$  (75 MHz,  $\text{CDCl}_3$ ):  $\delta$  144.5, 139.1, 131.4, 130.4, 128.2, 128.1, 127.7, 126.1, 62.9, 48.0, 43.2, 35.5, 32.6, 27.3, 25.7; **IR** (neat): 3356, 2930, 1491, 1093, 1091, 1015,  $700\text{ cm}^{-1}$ ;  $[\alpha]_{\text{D}}^{20} = +39.0$  ( $c = 0.2$ , EtOH); **HRMS** (ESI)  $m/z$  calcd. for  $\text{C}_{19}\text{H}_{23}\text{ONaCl}$  ( $\text{M}+\text{Na}$ ) $^+$ : 325.1335, found 325.1349.

## Methods for Modeling Strategy

### DFT Calculations

DFT calculations were performed using Gaussian 09 software.<sup>6</sup> The geometries of the substrates and PyrOx ligands were optimized using M06-2x/def2tzvp level of theory<sup>7</sup> with an ultrafine integration grid. IR frequencies and intensities as well as the polarizabilities of the entire molecule were obtained for the geometry optimized structure with the lowest-lying energy. Subsequently, Sterimol values of the alkene substituents and oxazoline substituents of the PyrOx ligands were calculated using Molecular Modeling Pro®.<sup>8</sup> NBO charges were calculated using version 6.0.<sup>9</sup>

### Model Development

First, molecular descriptors or parameters that represent the steric and electronic perturbations induced by the substituents on the alkenyl alcohol substrates and the PyrOx ligands were identified. Parameters that were considered for the substrates include IR frequency and intensity of the alkene C=C stretch, IR frequencies and intensities of the alkenyl CH<sub>2</sub> symmetric, asymmetric, and wagging stretches, IR frequencies and intensities of the allylic CH<sub>2</sub> scissoring stretch, NBO charges at the allylic position, and Sterimol values of the variable alkene substituent (Table S2 and Figure S3). Parameters that were considered for the PyrOx ligands include IR frequency and intensity of the oxazoline C=N stretch, IR frequencies and intensities of the pyridine ring stretches, Sterimol values of the oxazoline substituent, and the polarizabilities of the ligand (Table S3 and Figure S4). Next, using MATLAB® R2014a software<sup>10</sup>, a multiple linear regression model was developed to utilize these parameters in predicting the difference in transition state energies ( $\Delta\Delta G^\ddagger$ ). These predicted  $\Delta\Delta G^\ddagger$  values were then compared to the measured  $\Delta\Delta G^\ddagger$  values calculated based on Curtin-Hammett principle using the formula, measured  $\Delta\Delta G^\ddagger = -RT\ln(er)$ , where R is the gas constant, T is temperature, and er is the enantiomeric ratio. The measured  $\Delta\Delta G^\ddagger$  was obtained from an average enantiomeric ratio of two experimental results and the temperature is set at 298K. A good correlation between the two indicates that the predicted  $\Delta\Delta G^\ddagger$  approximates the measured  $\Delta\Delta G^\ddagger$  adequately. Leave-K-Out plots were also generated using MATLAB. Linear regression plots were generated using OriginPro 9.0.

**Table S2.** Raw parameter values for alkenol substrates (n=1 unless otherwise noted).

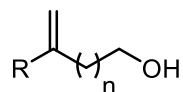

| R                                  | $\nu$ C=C | $I$ C=C | $\nu$ =CH <sub>2</sub><br>asym | $I$ =CH <sub>2</sub><br>asym | $\nu$ =CH <sub>2</sub><br>sym | $I$ C=CH <sub>2</sub><br>sym | $\nu$ =CH <sub>2</sub><br>wag | $I$ =CH <sub>2</sub><br>wag | $\nu$ allyl<br>CH <sub>2</sub><br>scissor | $I$ allyl<br>CH <sub>2</sub><br>scissor | NBO<br>allyl-C | L    | B <sub>1</sub> | B <sub>5</sub> |
|------------------------------------|-----------|---------|--------------------------------|------------------------------|-------------------------------|------------------------------|-------------------------------|-----------------------------|-------------------------------------------|-----------------------------------------|----------------|------|----------------|----------------|
| <b>(4-OMe)Ph</b>                   | 1721.84   | 26.9206 | 3264.74                        | 9.3446                       | 3185.10                       | 1.5627                       | 1449.34                       | 1.0489                      | 1483.32                                   | 15.9334                                 | -0.44549       | 8.54 | 1.89           | 3.25           |
| <b>(3-OMe)Ph</b>                   | 1723.88   | 17.6910 | 3265.04                        | 8.5775                       | 3184.63                       | 1.5627                       | 1452.72                       | 2.3763                      | 1482.30                                   | 8.9254                                  | -0.44573       | 7.15 | 1.88           | 4.75           |
| <b>(4-Cl)Ph</b>                    | 1722.97   | 20.9431 | 3266.47                        | 7.7882                       | 3186.64                       | 1.1884                       | 1458.20                       | 6.1235                      | 1483.89                                   | 11.3034                                 | -0.44545       | 7.74 | 1.77           | 3.23           |
| <b>(2-F)Ph</b>                     | 1728.69   | 21.9004 | 3279.47                        | 3.8839                       | 3196.31                       | 2.7816                       | 1455.92                       | 5.4583                      | 1484.57                                   | 10.2745                                 | -0.44343       | 6.35 | 1.77           | 3.83           |
| <b>(4-Me)Ph</b>                    | 1722.26   | 23.1808 | 3265.27                        | 8.7888                       | 3186.10                       | 2.1979                       | 1457.68                       | 3.1886                      | 1483.74                                   | 9.3298                                  | -0.44539       | 7.40 | 1.83           | 3.32           |
| <b>(4-Bu)Ph</b>                    | 1722.87   | 24.1886 | 3264.85                        | 8.9807                       | 3185.25                       | 1.5172                       | 1458.19                       | 7.0080                      | 1484.79                                   | 9.8060                                  | -0.44519       | 8.73 | 2.86           | 3.43           |
| <b>Ph</b>                          | 1723.80   | 20.2544 | 3265.37                        | 8.3275                       | 3185.98                       | 1.4631                       | 1452.42                       | 2.4599                      | 1483.25                                   | 9.1329                                  | -0.44546       | 6.34 | 1.77           | 3.23           |
| <b>(4-CO<sub>2</sub>Me)Ph</b>      | 1722.05   | 17.7991 | 3267.96                        | 7.3247                       | 3187.94                       | 1.1798                       | 1471.23                       | 7.5554                      | 1483.25                                   | 17.1525                                 | -0.44552       | 9.30 | 1.98           | 3.22           |
| <b>(4-F)Ph</b>                     | 1724.05   | 23.4591 | 3265.57                        | 8.0327                       | 3186.24                       | 1.3007                       | 1447.88                       | 1.2607                      | 1483.42                                   | 10.6687                                 | -0.44554       | 7.03 | 1.77           | 3.23           |
| <b>(4-<i>i</i>Pr)Ph</b>            | 1723.09   | 23.782  | 3266.90                        | 8.9181                       | 3187.87                       | 1.9005                       | 1449.52                       | 5.1413                      | 1484.78                                   | 9.9313                                  | -0.44502       | 8.76 | 2.15           | 3.45           |
| <b>(4-OMe,3-Cl) Ph</b>             | 1721.38   | 24.5167 | 3265.64                        | 8.4454                       | 3185.51                       | 1.4333                       | 1457.61                       | 7.6325                      | 1483.19                                   | 18.8190                                 | -0.44677       | 8.61 | 1.91           | 4.00           |
| <b>3,4-(CH<sub>2</sub>dioxy)Ph</b> | 1723.45   | 21.2797 | 3266.05                        | 9.0432                       | 3185.99                       | 1.4806                       | 1450.46                       | 7.942                       | 1482.28                                   | 13.3234                                 | -0.44536       | 7.63 | 1.78           | 3.71           |
| <b>CH<sub>2</sub>Ph</b>            | 1740.40   | 26.4429 | 3250.88                        | 10.7353                      | 3170.33                       | 3.8496                       | 1455.18                       | 4.6221                      | 1478.86                                   | 7.9633                                  | -0.46176       | 4.96 | 1.71           | 6.00           |
| <b>Me</b>                          | 1746.94   | 24.969  | 3252.52                        | 11.7705                      | 3172.65                       | 3.8720                       | 1453.10                       | 1.641                       | 1480.14                                   | 5.4506                                  | -0.62681       | 3.07 | 1.70           | 2.19           |
| <b>Cy</b>                          | 1735.11   | 28.6708 | 3262.60                        | 10.6694                      | 3187.77                       | 4.0618                       | 1455.91                       | 6.1847                      | 1479.33                                   | 5.3164                                  | -0.45225       | 6.49 | 2.13           | 3.64           |
| <b>Ph, n=2</b>                     | 1724.81   | 17.6791 | 3268.57                        | 6.2069                       | 3185.88                       | 1.7399                       | 1453.63                       | 7.2528                      | 1478.47                                   | 7.7103                                  | -0.42348       | 6.34 | 1.77           | 3.23           |
| <b>Ph, n=3</b>                     | 1723.10   | 19.036  | 3267.92                        | 7.7403                       | 3185.54                       | 1.8688                       | 1452.32                       | 4.8331                      | 1475.23                                   | 7.1978                                  | -0.41847       | 6.34 | 1.77           | 3.23           |
| <b>Ph, n=4</b>                     | 1723.11   | 18.7924 | 3268.49                        | 7.4459                       | 3186.28                       | 1.8843                       | 1452.25                       | 5.4012                      | 1474.8                                    | 7.0049                                  | -0.41971       | 6.34 | 1.77           | 3.23           |

**Figure S3.** Depictions of the parameters evaluated to describe substrate effects.

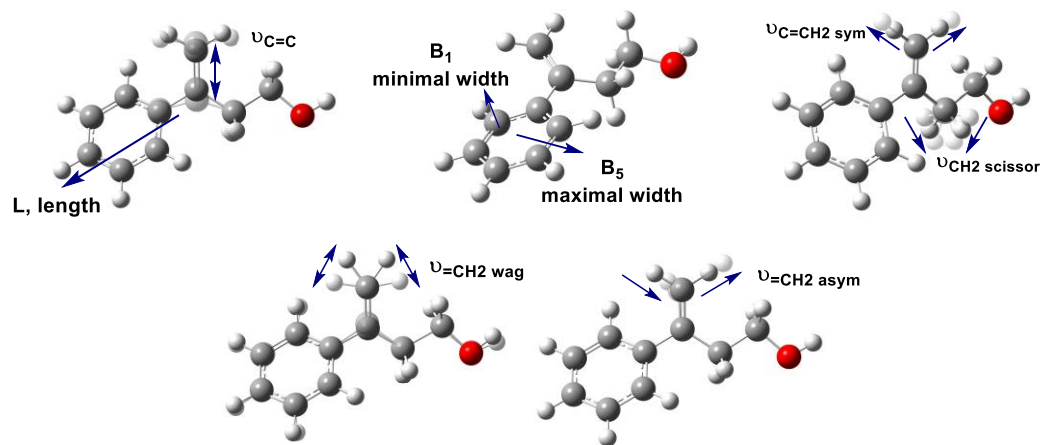

**Table S3.** Raw parameter values for PyrOx ligands.

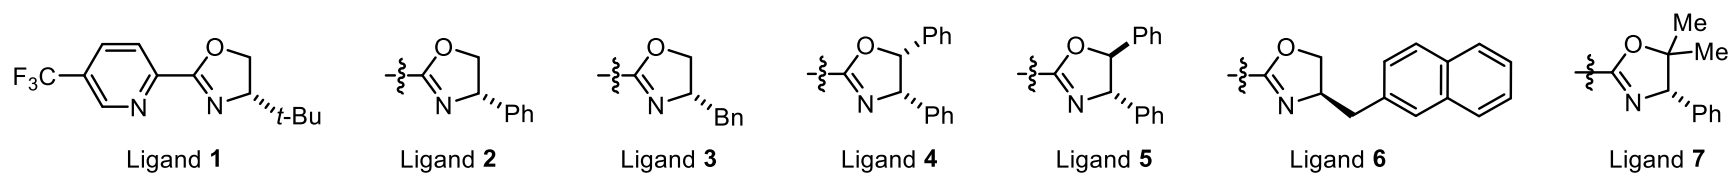

| Ligand | $\nu$ C=N ox | I C=N ox | $\nu$ py ring 1 | I py ring 1 | $\nu$ py ring 2 | I py ring 2 | $\nu$ py ring 3 | I py ring 3 | Dihedral Angle | B <sub>1</sub> ox | B <sub>5</sub> ox | L ox | polar   |
|--------|--------------|----------|-----------------|-------------|-----------------|-------------|-----------------|-------------|----------------|-------------------|-------------------|------|---------|
| 1      | 1775.85      | 108.7417 | 1686.88         | 78.1699     | 1649.49         | 58.8413     | 1550.99         | 5.2579      | 61.2           | 2.92              | 3.35              | 4.35 | 230.496 |
| 2      | 1772.37      | 130.421  | 1688.16         | 70.3881     | 1650.40         | 65.6686     | 1551.09         | 3.9118      | 12.2           | 1.77              | 3.21              | 6.38 | 269.027 |
| 3      | 1773.42      | 135.4201 | 1686.21         | 81.3039     | 1647.93         | 52.7276     | 1552.36         | 8.2620      | 70.4           | 1.72              | 5.97              | 4.65 | 271.035 |
| 4      | 1766.49      | 102.4718 | 1687.67         | 72.2049     | 1650.39         | 61.4205     | 1550.62         | 3.7490      | 20.6           | 1.77              | 3.21              | 6.38 | 329.547 |
| 5      | 1768.68      | 119.4807 | 1686.81         | 75.1524     | 1649.37         | 61.1527     | 1550.14         | 4.0311      | 20.4           | 1.77              | 3.21              | 6.38 | 335.135 |
| 6      | 1773.57      | 146.0401 | 1685.87         | 79.6678     | 1648.20         | 57.7636     | 1552.56         | 9.0713      | 70.1           | 1.72              | 8.14              | 5.13 | 312.415 |
| 7      | 1762.8       | 119.3274 | 1687.34         | 76.5438     | 1649.08         | 65.1753     | 1550.83         | 3.3047      | 21.8           | 1.77              | 3.21              | 6.38 | 291.705 |



**Figure S4.** Depictions of the parameters evaluated to describe PyrOx ligands.

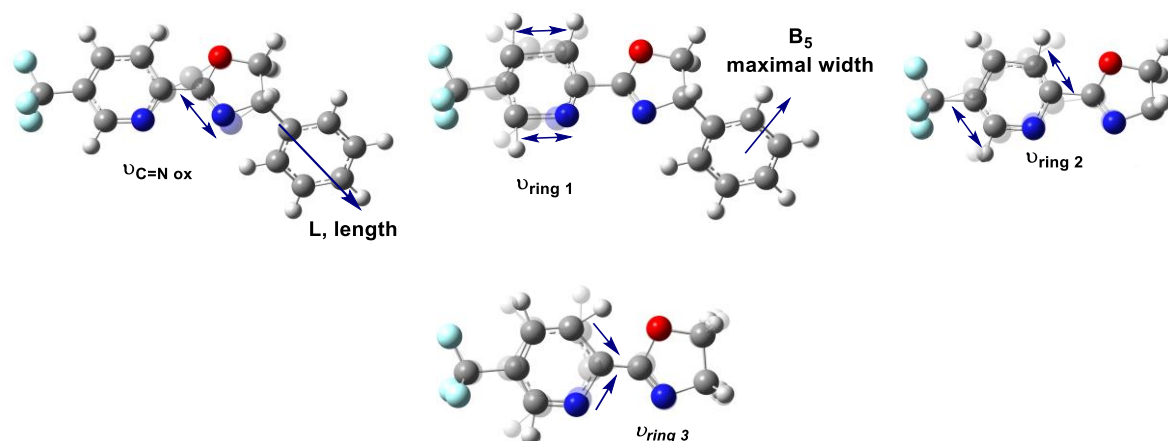

**Table S4.** Measured and predicted enantioselectivity values for substrates.

| Substrate                     | % ee | Measured $\Delta\Delta G^\ddagger$<br>(kcal/mol) | Predicted $\Delta\Delta G^\ddagger$<br>(kcal/mol) | Predicted $\Delta\Delta G^\ddagger$ (LKO)<br>(kcal/mol, K=6) |
|-------------------------------|------|--------------------------------------------------|---------------------------------------------------|--------------------------------------------------------------|
| (4-OMe)Ph                     | 93   | 1.963951                                         | 1.849753                                          | 1.841188                                                     |
| (3-OMe)Ph                     | 92   | 1.881808                                         | 1.674524                                          | 1.684881                                                     |
| (4-Cl)Ph                      | 83   | 1.407053                                         | 1.638762                                          | 1.671659                                                     |
| (2-F)Ph                       | 60   | 0.820861                                         | 0.486502                                          | 0.624547                                                     |
| (4-Me)Ph                      | 91   | 1.808974                                         | 1.731657                                          | 1.717441                                                     |
| (4-t-Bu)Ph                    | 90   | 1.743479                                         | 1.680311                                          | 1.817261                                                     |
| Ph                            | 91   | 1.808974                                         | 1.676364                                          | 1.684116                                                     |
| (4-CO <sub>2</sub> Me)Ph      | 87   | 1.578702                                         | 1.689607                                          | 1.670306                                                     |
| (4-F)Ph                       | 80   | 1.301034                                         | 1.430107                                          | 1.459981                                                     |
| (4- <i>i</i> Pr)Ph            | 90   | 1.743479                                         | 1.817584                                          | 1.712121                                                     |
| (4-OMe,3-Cl) Ph               | 92   | 1.881808                                         | 1.965595                                          | 1.869275                                                     |
| 3,4-(CH <sub>2</sub> dioxy)Ph | 83   | 1.407053                                         | 1.547234                                          | 1.578588                                                     |
| CH <sub>2</sub> Ph            | -39  | -0.487675                                        | --                                                | --                                                           |
| Me                            | -3   | -0.035538                                        | -0.050959                                         | 0.187645                                                     |
| Cy                            | -35  | -0.432777                                        | -0.184883                                         | 0.170290                                                     |
| Ph, n=2                       | 77   | 1.208325                                         | 0.862826                                          | 0.782118                                                     |
| Ph, n=3                       | 62   | 0.858589                                         | 1.012742                                          | 1.093515                                                     |
| Ph, n=4                       | 56   | 0.749434                                         | 0.867480                                          | 0.884033                                                     |

**Figure S5.** Leave-K-Out Plot for Substrate Model (K = 6).

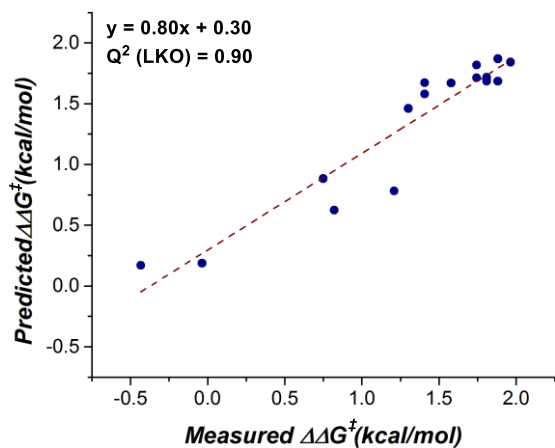

**Figure S6.** Chain length trend, relating  $NBO_{allyl-C}$  with measured  $\Delta\Delta G^\ddagger$  ( $R^2 = 0.92$ ).

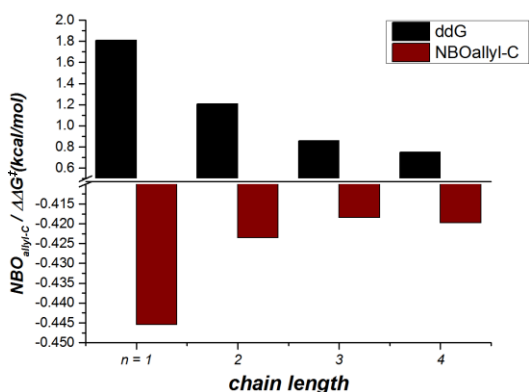

**Table S5.** Measured and predicted enantioselectivity values for ligands.

| Ligand | Measured $\Delta\Delta G^\ddagger$<br>(kcal/mol) | Predicted $\Delta\Delta G^\ddagger$<br>(kcal/mol) | Predicted $\Delta\Delta G^\ddagger$ (LOO)<br>(kcal/mol) |
|--------|--------------------------------------------------|---------------------------------------------------|---------------------------------------------------------|
| 1      | 0.264865                                         | 0.250927                                          | 0.230741                                                |
| 2      | 0.981890                                         | 0.959520                                          | 0.950686                                                |
| 3      | -0.191122                                        | -0.115250                                         | -0.059500                                               |
| 4      | 1.629255                                         | 1.581703                                          | 1.553647                                                |
| 5      | 1.487601                                         | 1.564424                                          | 1.616056                                                |
| 6      | 0.142798                                         | 0.078634                                          | -0.043010                                               |
| 7      | 1.334686                                         | 1.330004                                          | 1.328236                                                |

**Figure S8.** Leave-One-Out Plot for Ligand Model (LOO).

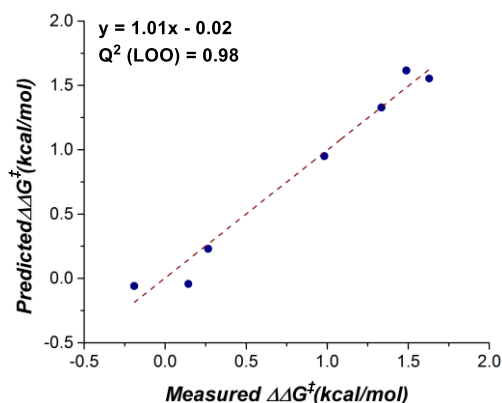

### References:

- (1) Drent, E.; van Broekhoven, J. A. M.; Doyle, M. J. *J. Organomet. Chem.* **1991**, *417*, 235.
- (2) Chan, K. S. L.; Wasa, M.; Wang, X.; Yu, J.-Q. *Angew. Chem., Int. Ed.* **2011**, *50*, 9081.
- (3) (a) Werner, E. W.; Mei, T.-S.; Burckle, A. J.; Sigman, M. S. *Science* **2012**, *338*, 1455. (b) Zhang, C.; Santiago, C. B.; Crawford, J. M.; Sigman, M. S. *J. Am. Chem. Soc.* **2015**, *137*, 15668.
- (4) For the synthesis and analytical data of substrates **1a**, **1q**, **1y** and **1z** see: (a) Reetz, M. T.; Guo, H.; Ma, J.-A.; Goddard, R.; Mynott, R. J. *J. Am. Chem. Soc.* **2009**, *131*, 4136. For substrates **1p**, **1u**, **1r**, **1s** and **1t** see: (b) Brindle, C. S.; Yeung, C. S.; Jacobsen, E. N. *Chem. Sci.* **2013**, *4*, 2100. For substrates **1v** and **1w** see: (c) Gan, P.; Smith, M. W.; Braffman, N. R.; Snyder, S. A. *Angew. Chem., Int. Ed.* **2016**, *55*, 3625. For substrate **1ac** see: (d) Li, Z.; Gupta, M. K.; Snowden, T. S. *Eur. J. Org. Chem.* **2015**, 7009. For substrates **1af** and **1ag** see: (e) Fujita, S.; Abe, M.; Shibuya, M.; Yamamoto, Y. *Org. Lett.* **2015**, *17*, 3822. For substrate **1ah** see: (f) Baldwin, S. W.; Wilson, J. D.; Aubé, J. *J. Org. Chem.* **1985**, *50*, 4432.
- (5) (a) Clark, R. D.; Jahangir *J. Org. Chem.* **1988**, *53*, 2378. (b) Lutz, G. P.; Du, H.; Gallagher, D. J.; Beak, P. *J. Org. Chem.* **1996**, *61*, 4542. (c) Matsumura, S.; Maeda, Y.; Nishimura, T.; Uemura, S. *J. Am. Chem. Soc.* **2003**, *125*, 8862. (d) Nelson, S. G.; Wan, Z.; Stan, M. A. *J. Org. Chem.*, **2002**, *67*, 4680.
- (6) Frisch, M. J. T., G. W.; Schlegel, H. B.; Scuseria, G. E.; Robb, M. A.; Cheeseman, J. R.; Scalmani, G.; Barone, V.; Mennucci, B.; Petersson, G. A.; Nakatsuji, H.; Caricato, M.; Li, X.; Hratchian, H. P.; Izmaylov, A. F.; Bloino, J.; Zheng, G.; Sonnenberg, J. L.; Hada, M.; Ehara, M.;

Toyota, K.; Fukuda, R.; Hasegawa, J.; Ishida, M.; Nakajima, T.; Honda, Y.; Kitao, O.; Nakai, H.; Vreven, T.; Montgomery, J. A., Jr.; Peralta, J. E.; Ogliaro, F.; Bearpark, M.; Heyd, J. J.; Brothers, E.; Kudin, K. N.; Staroverov, V. N.; Kobayashi, R.; Normand, J.; Raghavachari, K.; Rendell, A.; Burant, J. C.; Iyengar, S. S.; Tomasi, J.; Cossi, M.; Rega, N.; Millam, M. J.; Klene, M.; Knox, J. E.; Cross, J. B.; Bakken, V.; Adamo, C.; Jaramillo, J.; Gomperts, R.; Stratmann, R. E.; Yazyev, O.; Austin, A. J.; Cammi, R.; Pomelli, C.; Ochterski, J. W.; Martin, R. L.; Morokuma, K.; Zakrzewski, V. G.; Voth, G. A.; Salvador, P.; Dannenberg, J. J.; Dapprich, S.; Daniels, A. D.; Farkas, Ö.; Foresman, J. B.; Ortiz, J. V.; Cioslowski, J.; Fox, D. J.; Gaussian, Inc.: Wallingford CT, 2009; Vol. Revision D.01.

(7) (a) Zhao, Y.; Truhlar, D. G. *Theor. Chem. Acc.* **2008**, *120*, 215. (b) Zhao, Y.; Truhlar, D. G. *Acc. Chem. Res.* **2008**, *41*, 157.

(8) Molecular Modeling Pro Version 6.3.6; Quinn, J. A.; ChemSW, Inc.: Fairfield, CA.

(9) NBO 6.0. E. D. Glendening, J. K. Badenhoop, A. E. Reed, J. E. Carpenter, J. A. Bohmann, C. M. Morales, C. R. Landis, and F. Weinhold (Theoretical Chemistry Institute, University of Wisconsin, Madison, WI, 2013); <http://nbo6.chem.wisc.edu/>

(10) In *MATLAB(R2014a)*; The MathWorks, Inc.: Natick, MA, 2014.

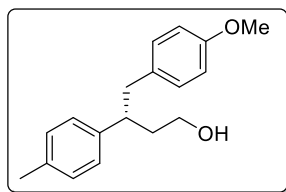

Separation of enantiomers by SFC. Chiralcel® Column OZ-H, 40 °C, *i*-PrOH: CO<sub>2</sub> = 2:98-20:80 (20 min), 2mL/min, 160bar,  $t_1 = 16.8$ ,  $t_2 = 17.8$ ; er = 7.5:92.5.

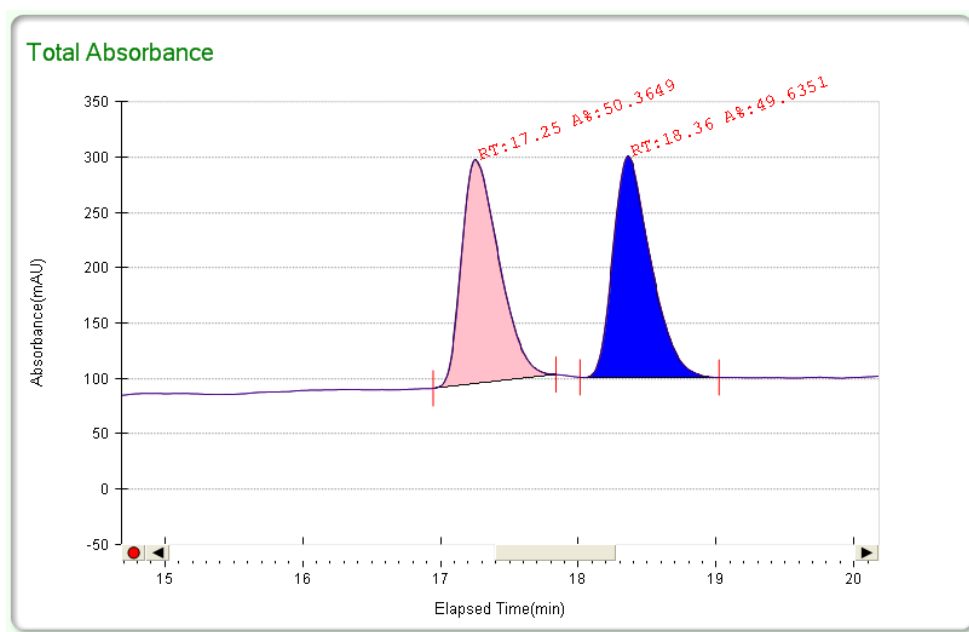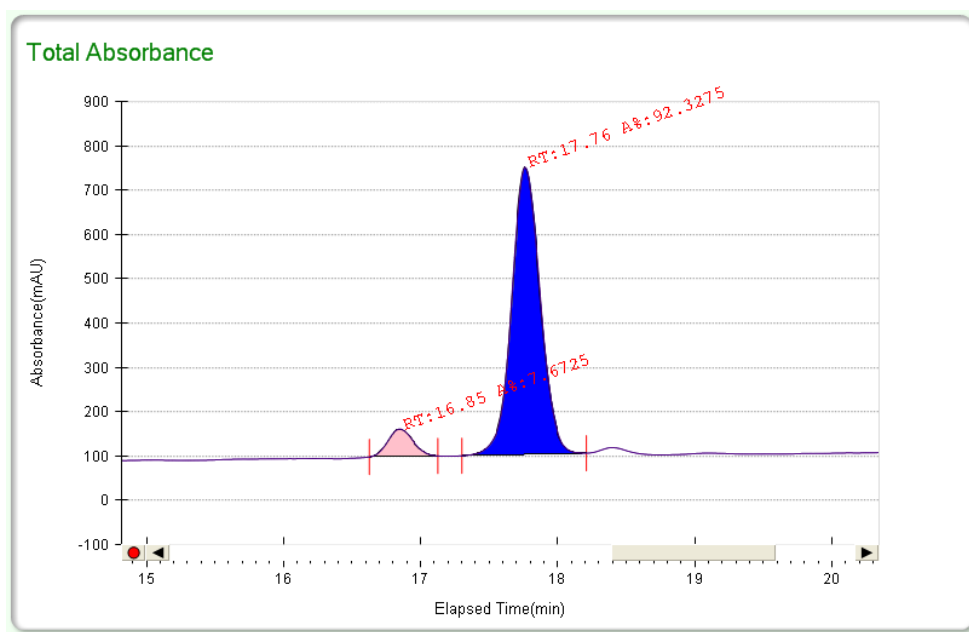

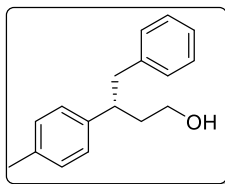

Separation of enantiomers by SFC. Chiralcel® Column OZ-H, 40 °C, *i*-PrOH: CO<sub>2</sub> = 2:98-20:80 (20 min), 2mL/min, 160bar,  $t_1 = 15.2$ ,  $t_2 = 16.2$ ; er = 6:94.

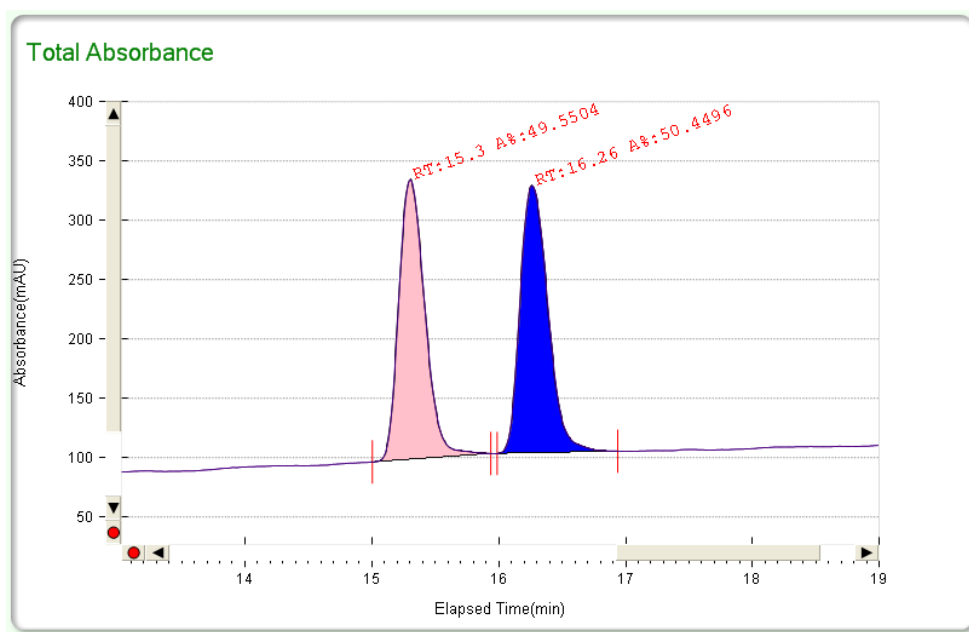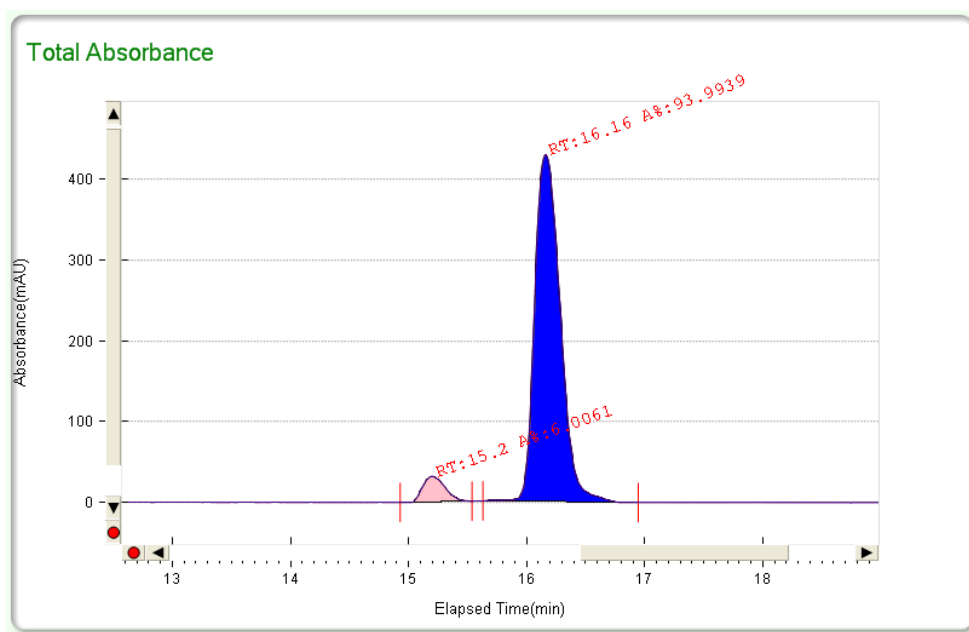

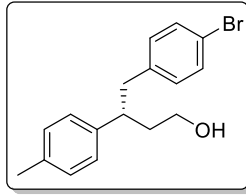

Separation of enantiomers by SFC. Chiralcel® Column OZ-H, 40 °C, *i*-PrOH: CO<sub>2</sub> = 2:98-20:80 (20 min), 2mL/min, 160bar,  $t_1 = 17.2$ ,  $t_2 = 18.1$ ; er = 5.5:94.5.

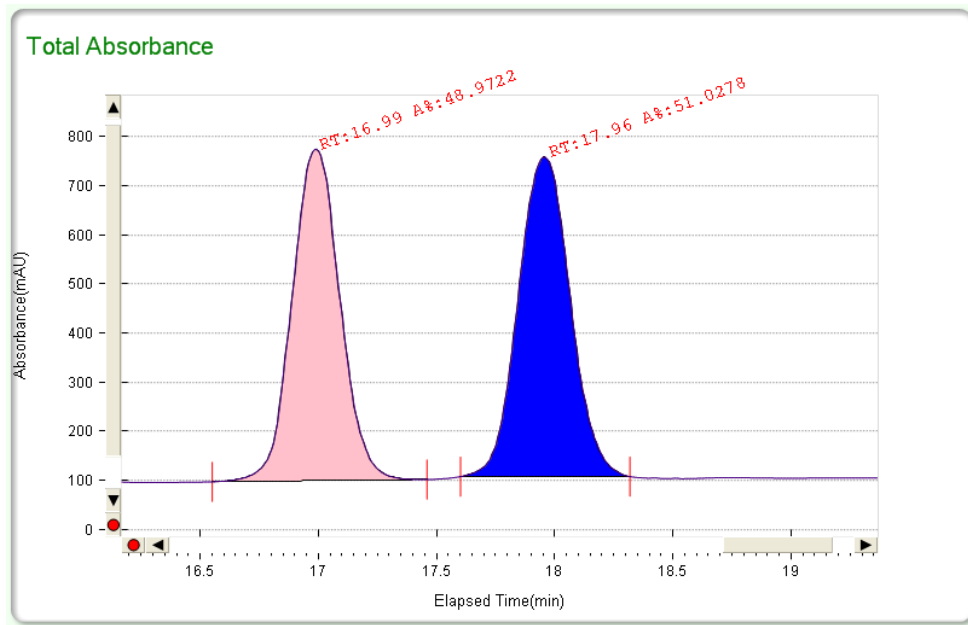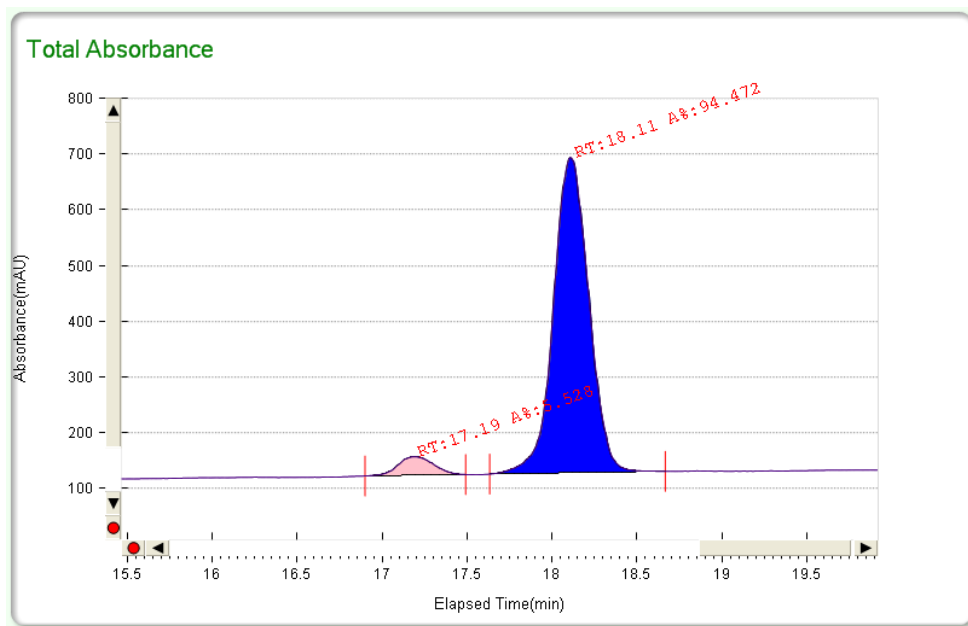

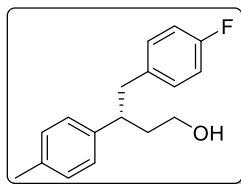

Separation of enantiomers by SFC. Chiralcel® Column OZ-H, 40 °C, *i*-PrOH: CO<sub>2</sub> = 2:98-20:80 (20 min), 2mL/min, 160bar,  $t_1 = 12.6$ ,  $t_2 = 13.2$ ; er = 4.5:95.5.

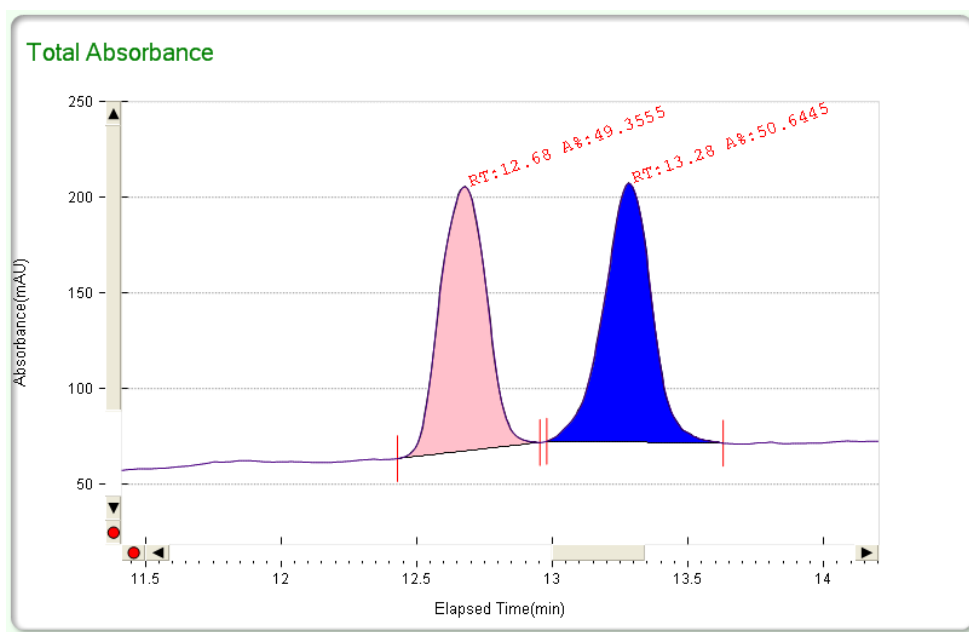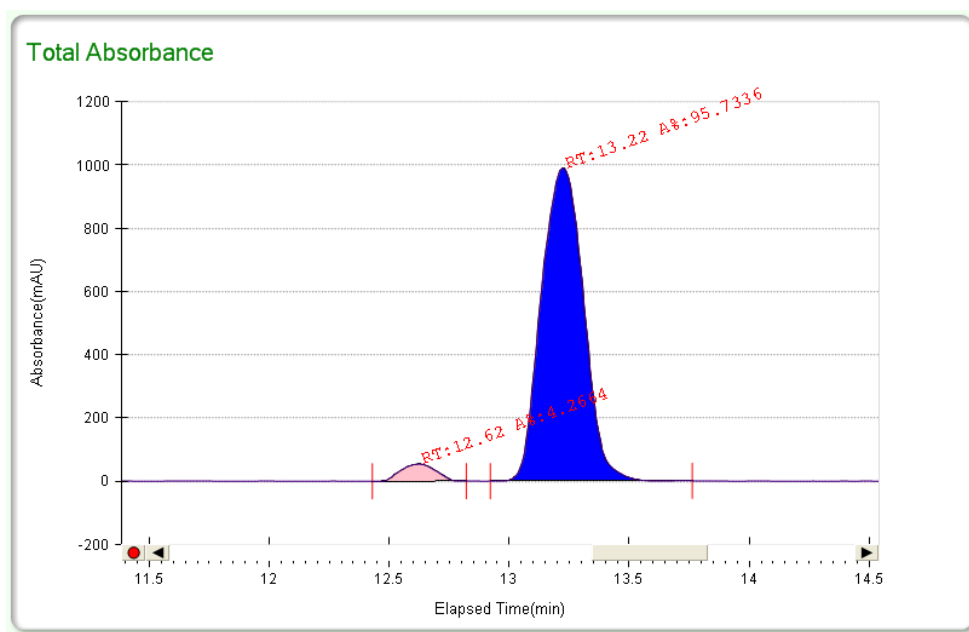



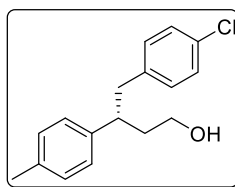

Separation of enantiomers by SFC. Chiralcel® Column OZ-H, 40 °C, *i*-PrOH: CO<sub>2</sub> = 2:98-20:80 (20 min), 2mL/min, 160bar,  $t_1 = 15.2$ ,  $t_2 = 15.9$ ; er = 4.5:95.5.

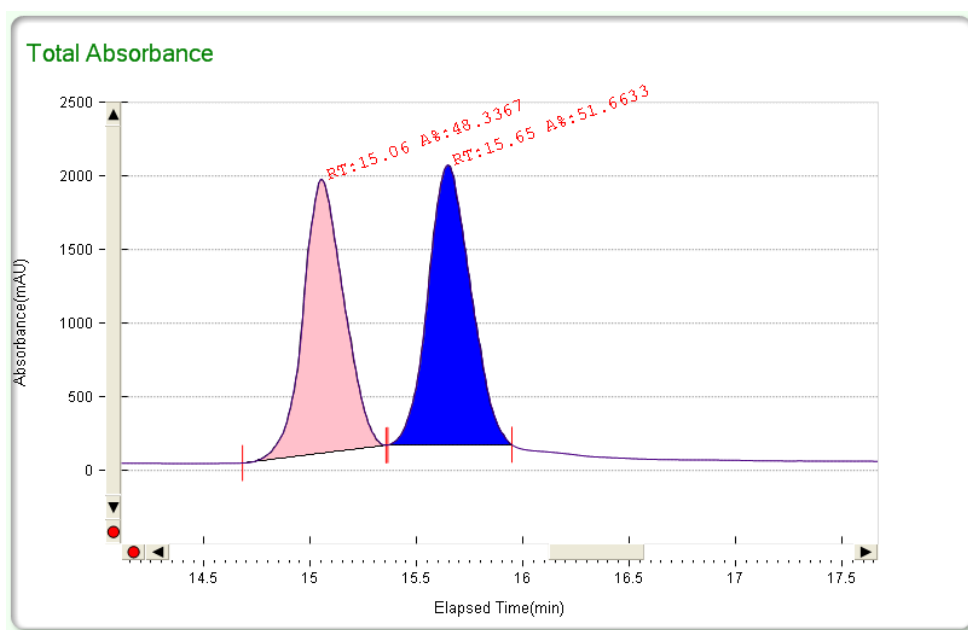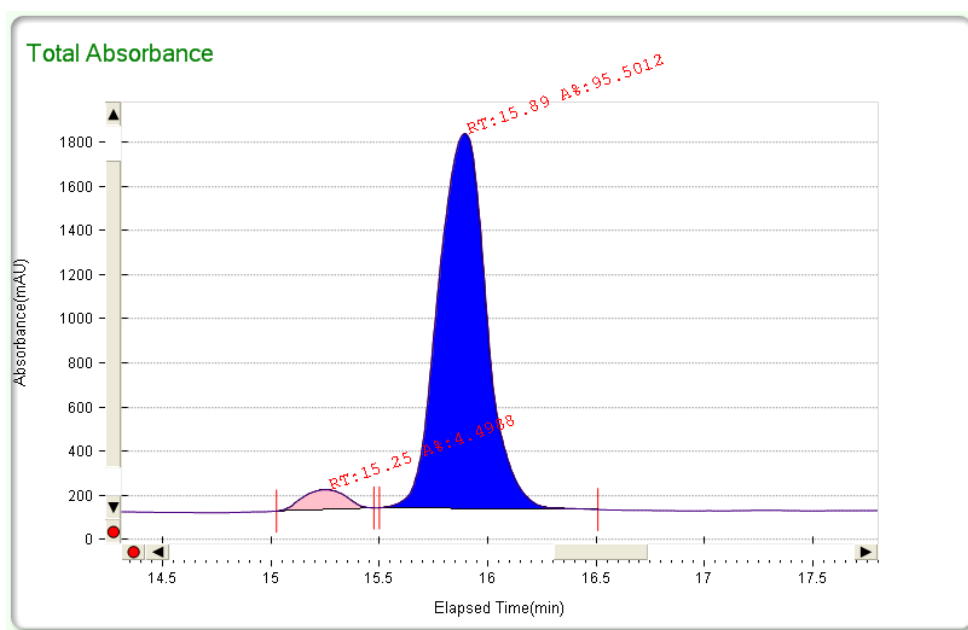

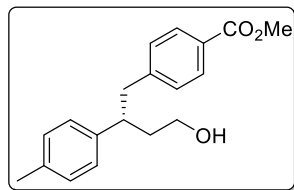

Separation of enantiomers by SFC. Chiralcel® Column OZ-H, 40 °C, *i*-PrOH: CO<sub>2</sub> = 5:95-15:85-50:50 (30 min), 2mL/min, 160bar,  $t_1 = 14.6$ ,  $t_2 = 15.3$ ; er = 4.5:95.5.

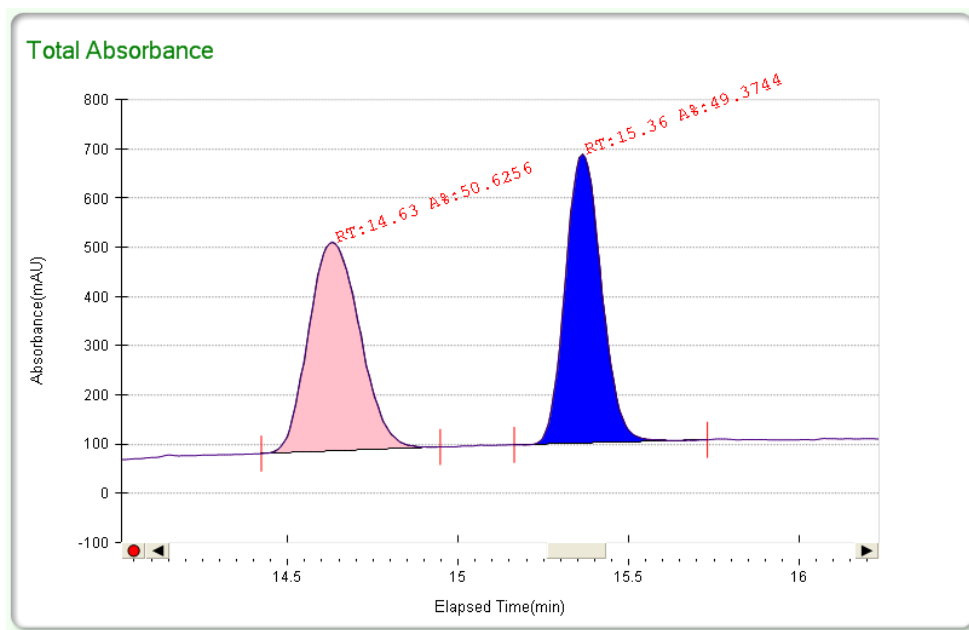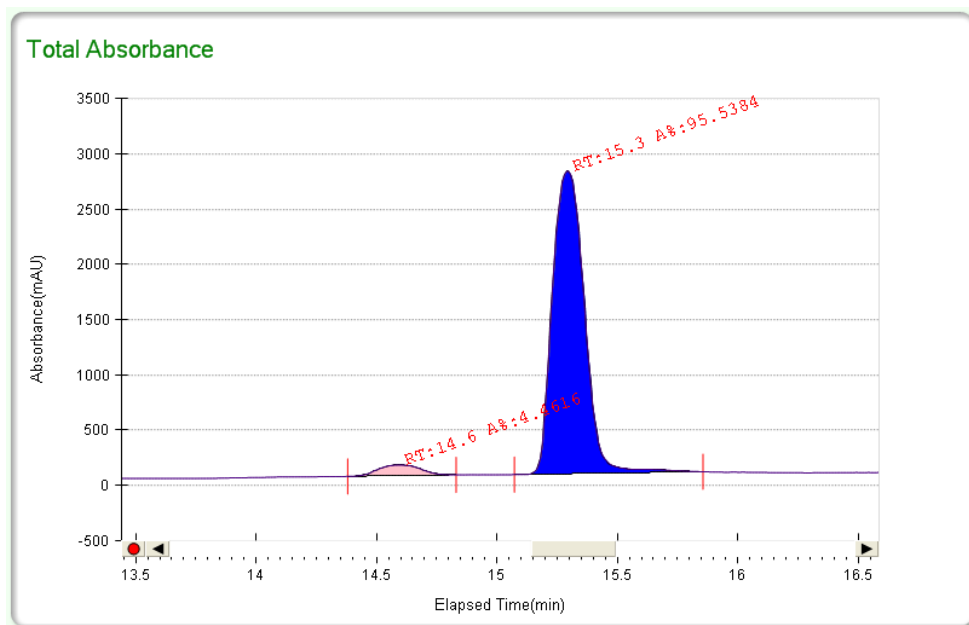

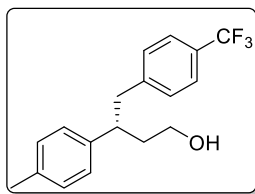

Separation of enantiomers by SFC. Chiralcel® Column OZ-H, 40 °C, *i*-PrOH: CO<sub>2</sub> = 5:95-10:90-15:85-20:80-50:50 (50 min), 2mL/min, 160bar, t<sub>1</sub> = 6.5, t<sub>2</sub> = 7.2; er = 4:96.

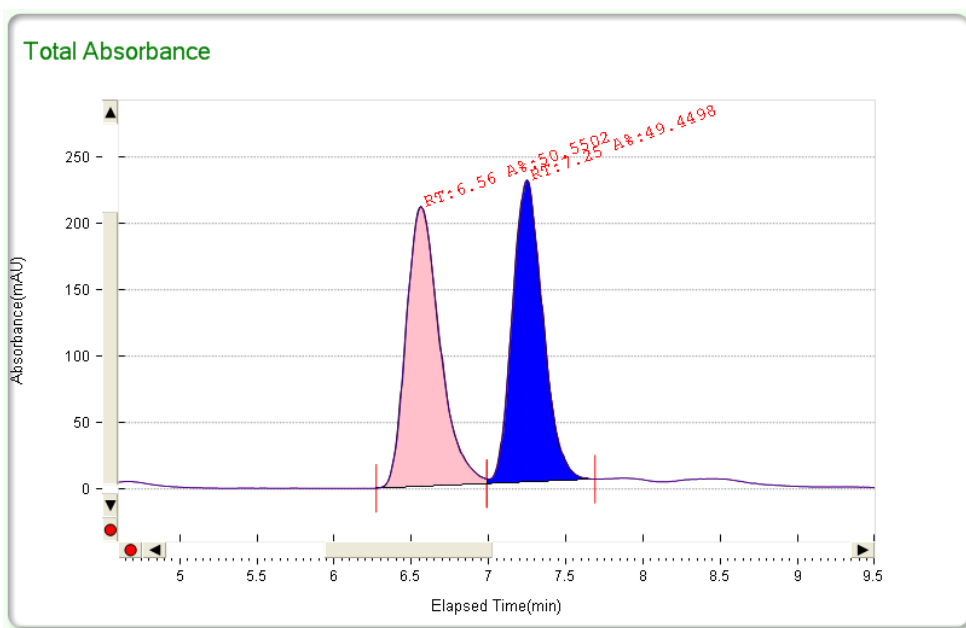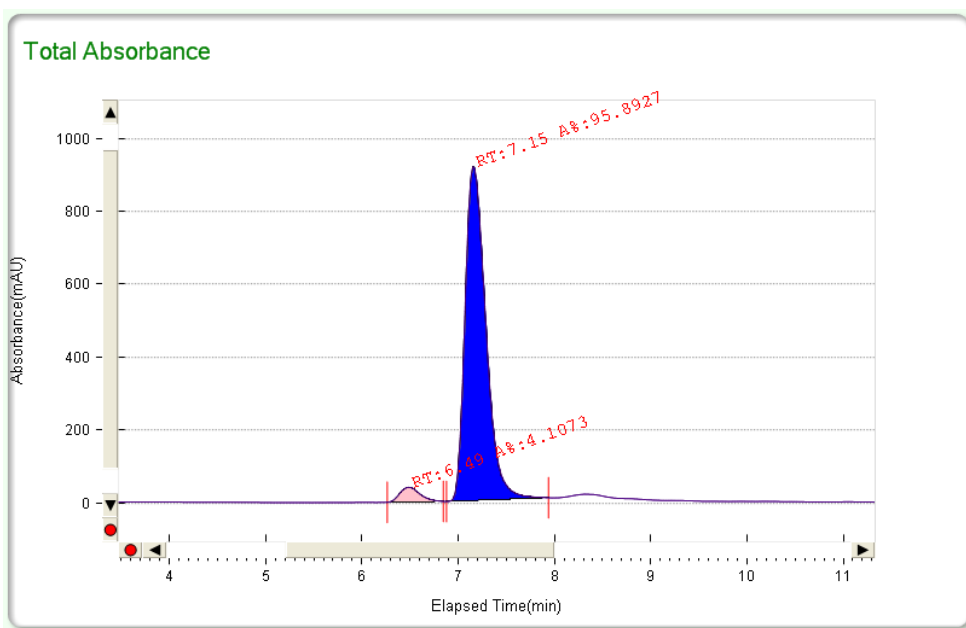

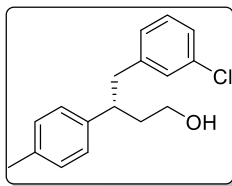

Separation of enantiomers by SFC. Chiralcel® Column OZ-H, 40 °C, *i*-PrOH: CO<sub>2</sub> = 2:98-20:80 (20 min), 2mL/min, 160bar,  $t_1 = 15.1$ ,  $t_2 = 15.7$ ; er = 3.5:96.5.

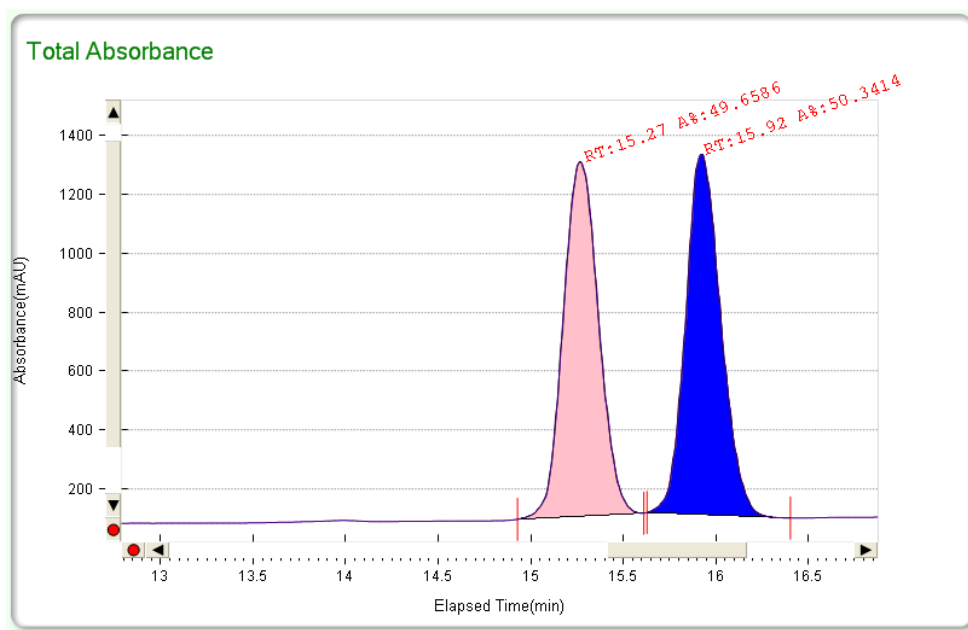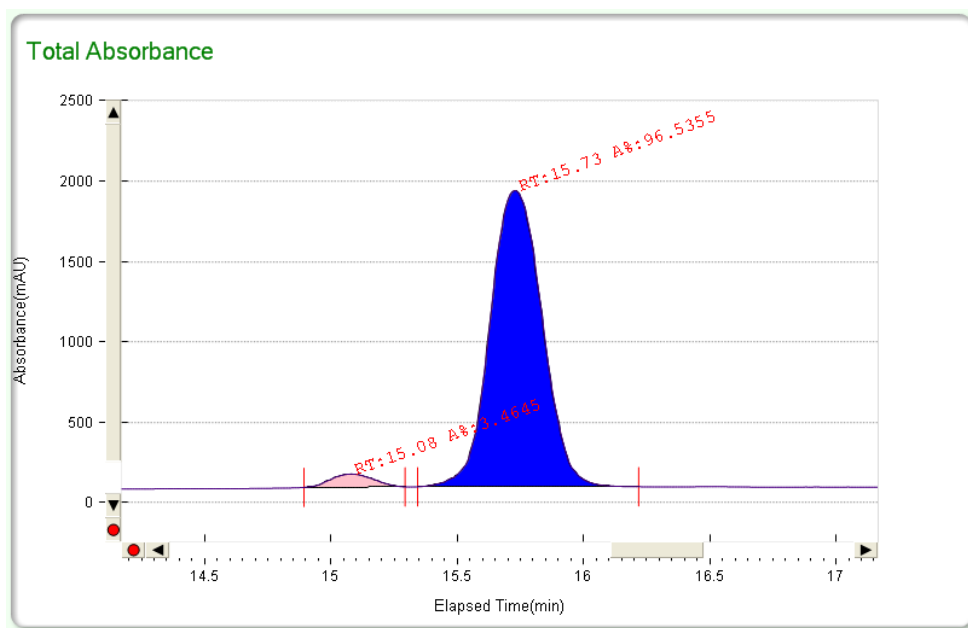

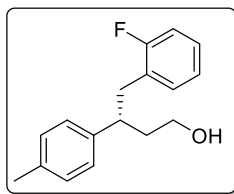

Separation of enantiomers by SFC. Chiralcel® Column OZ-H, 40 °C, *i*-PrOH: CO<sub>2</sub> = 2:98-20:80 (20 min), 2mL/min, 160bar,  $t_1 = 13.4$ ,  $t_2 = 14.2$ ; er = 6:94.

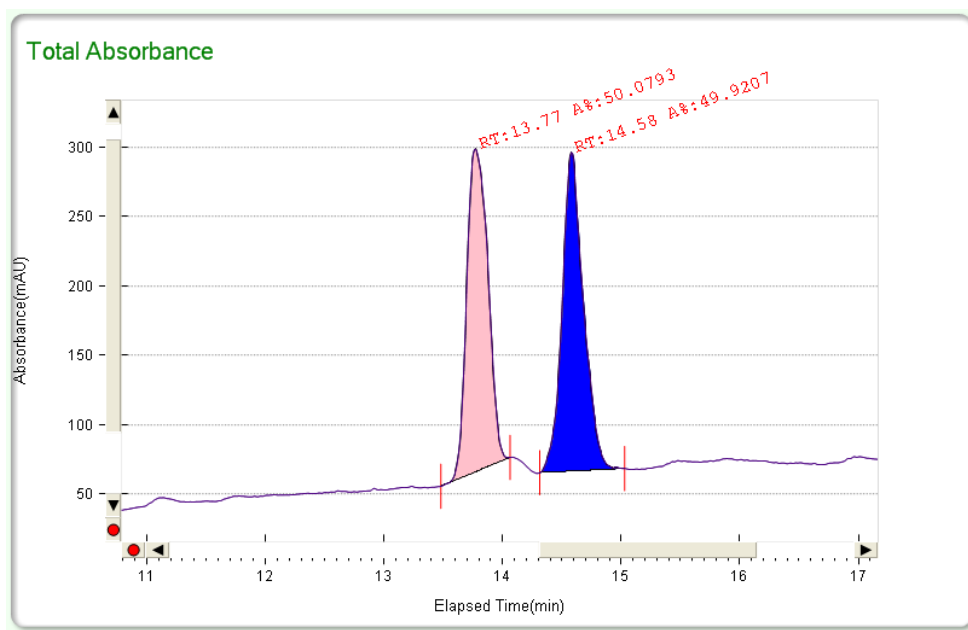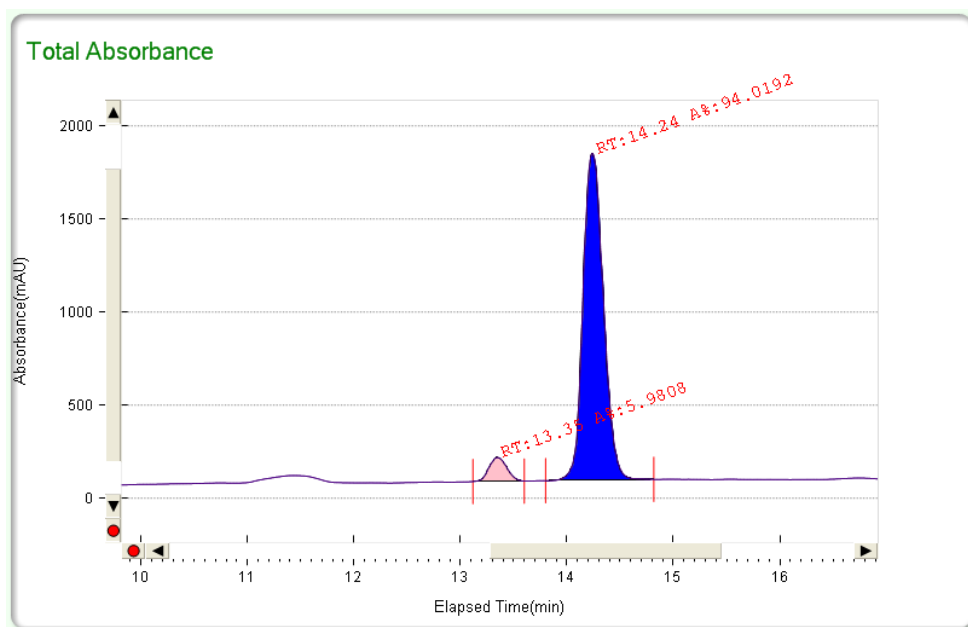

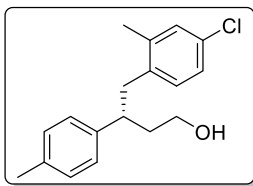

Separation of enantiomers by SFC. Chiralcel® Column OZ-H, 40 °C, *i*-PrOH: CO<sub>2</sub> = 2:98-20:80 (20 min), 2mL/min, 160bar,  $t_1 = 15.2$ ,  $t_2 = 16.9$ ; er = 7:93.

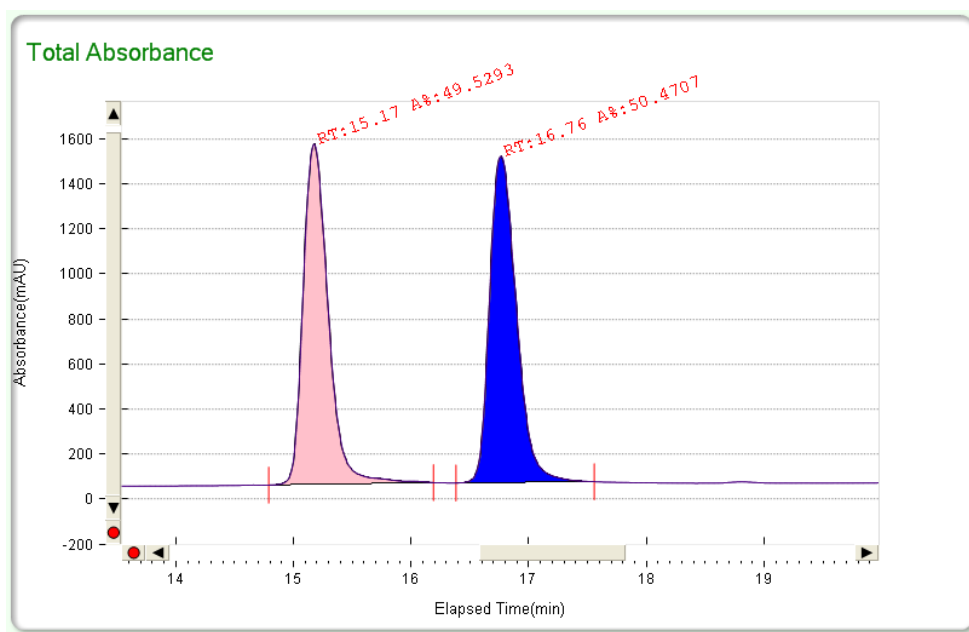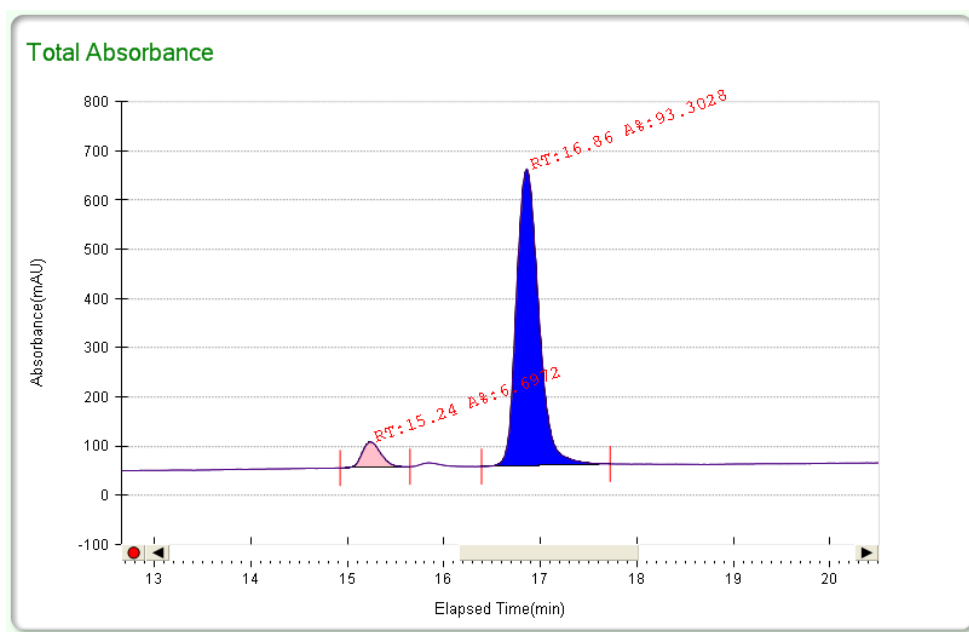

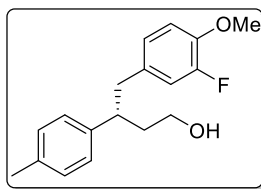

Separation of enantiomers by SFC. Chiralcel® Column OZ-H, 40 °C, *i*-PrOH: CO<sub>2</sub> = 2:98-20:80 (20 min), 2mL/min, 160bar,  $t_1 = 14.8$ ,  $t_2 = 15.5$ ; er = 5:95.

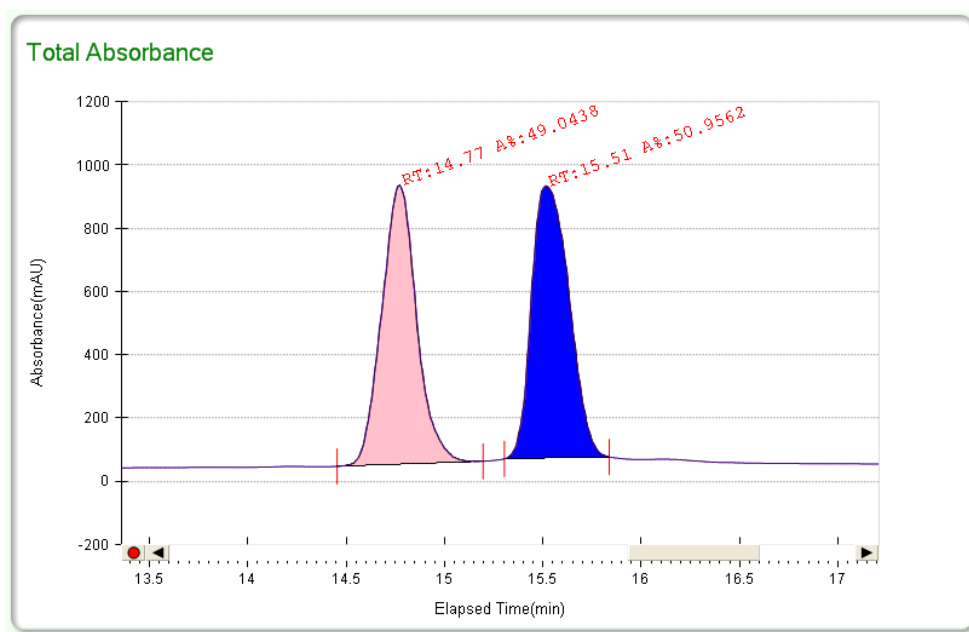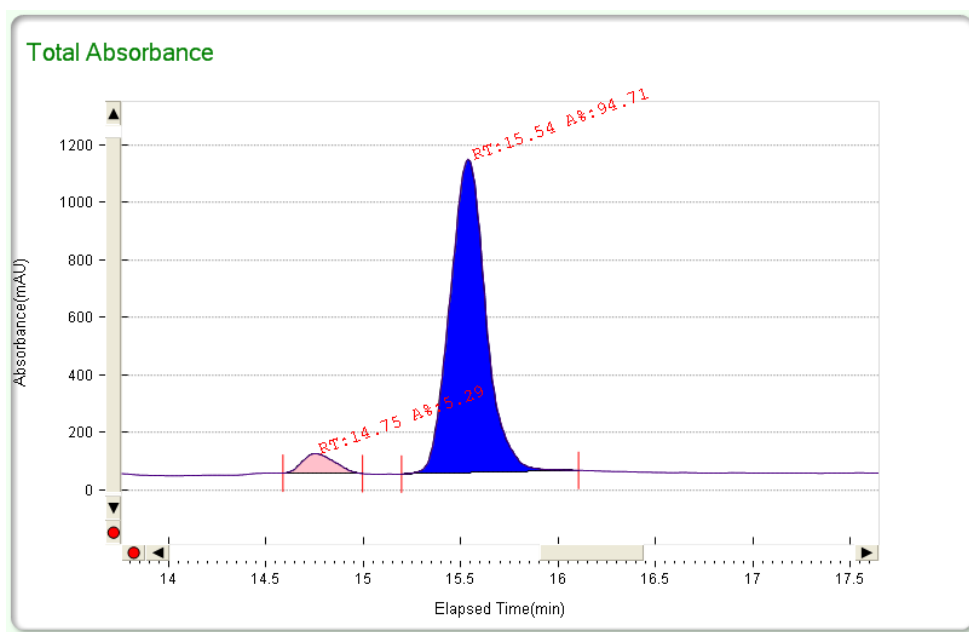

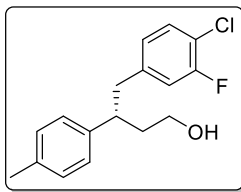

Separation of enantiomers by SFC. Chiralcel® Column OZ-H, 40 °C, *i*-PrOH: CO<sub>2</sub> = 2:98-20:80 (20 min), 2mL/min, 160bar,  $t_1 = 15.6$ ,  $t_2 = 16.4$ ; er = 4:96.

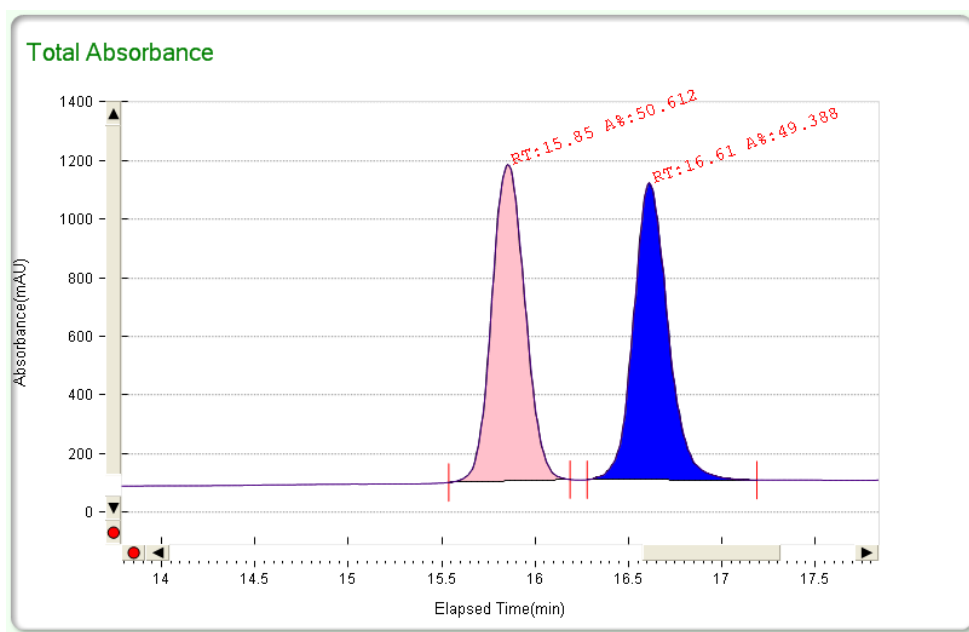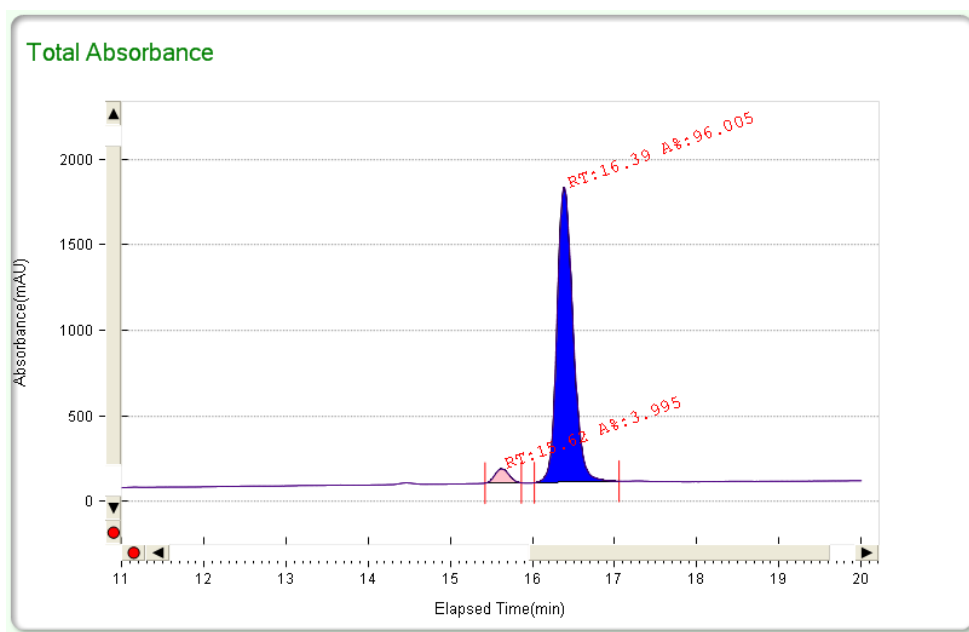



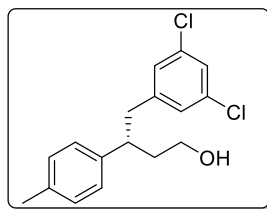

Separation of enantiomers by SFC. Chiralcel® Column OZ-H, 40 °C, *i*-PrOH: CO<sub>2</sub> = 5:95-10:90-15:85 (20 min), 2mL/min, 160bar,  $t_1 = 15.3$ ,  $t_2 = 18.1$ ; er = 2:98.

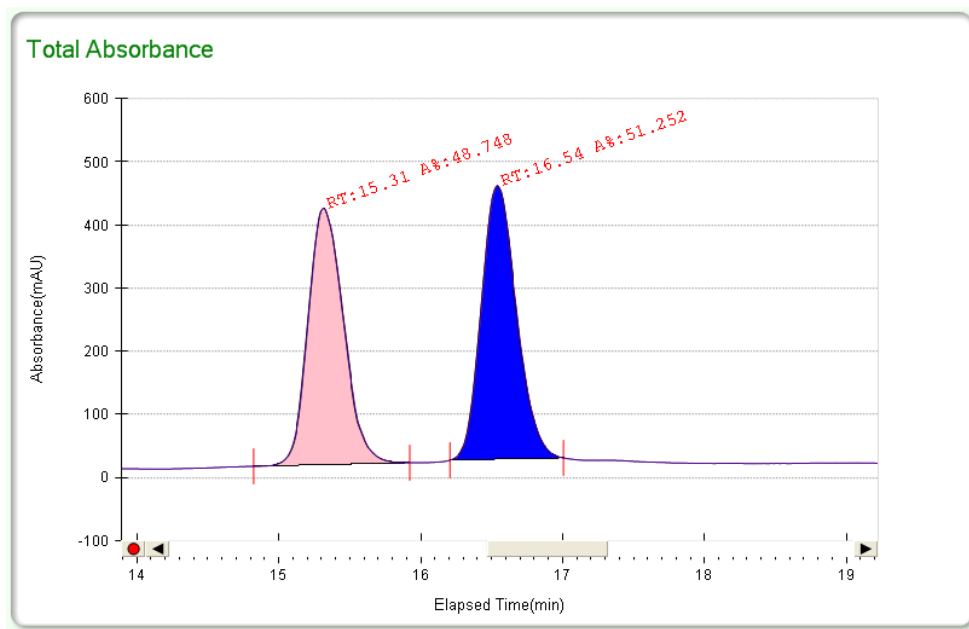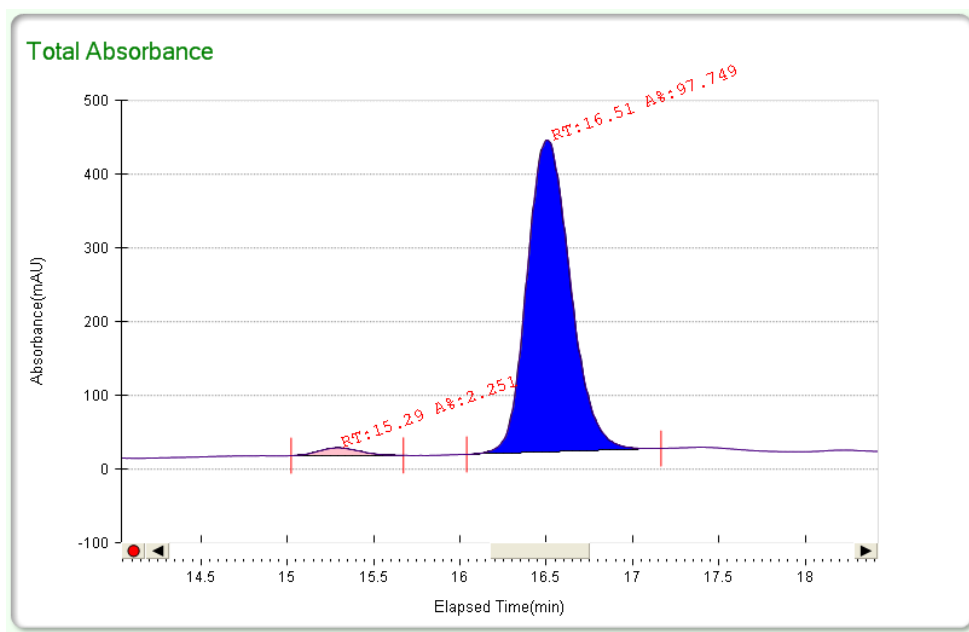

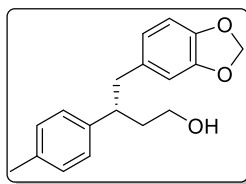

Separation of enantiomers by SFC. Chiralcel® Column OZ-H, 40 °C, *i*-PrOH: CO<sub>2</sub> = 2:98-20:80 (20 min), 2mL/min, 160bar,  $t_1 = 17.1$ ,  $t_2 = 18.1$ ; er = 7.5:92.5.

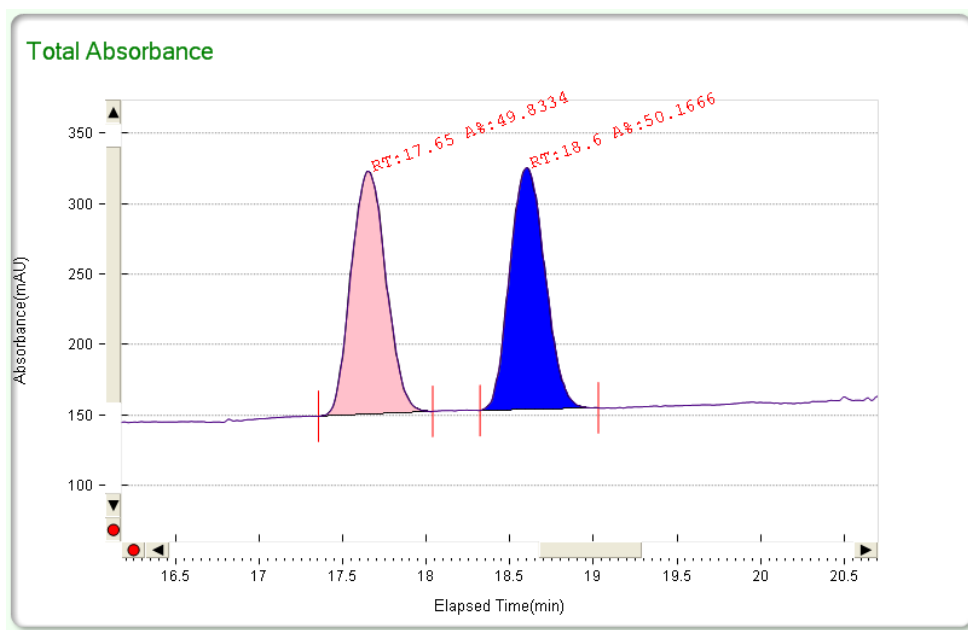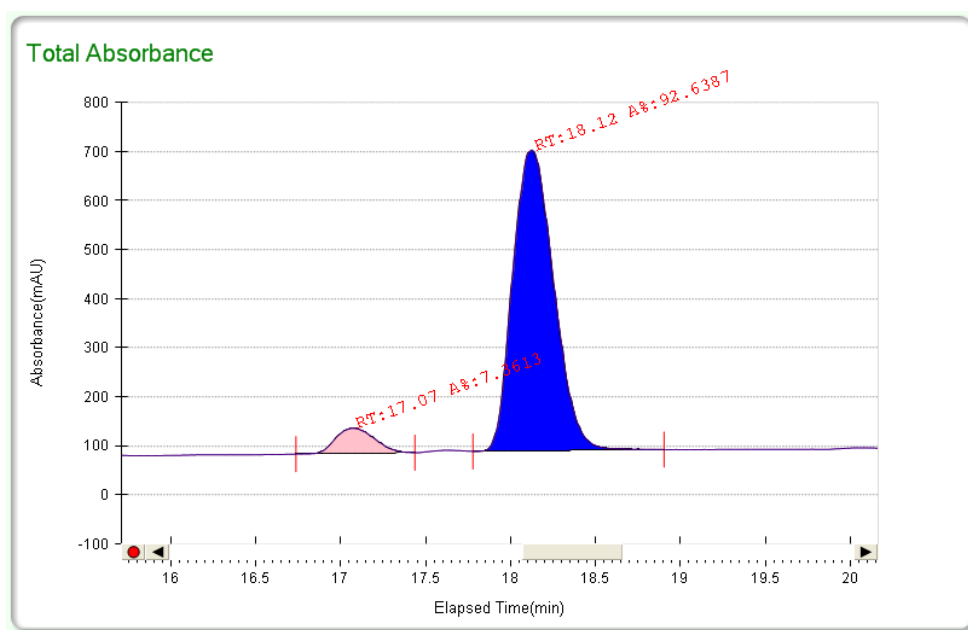

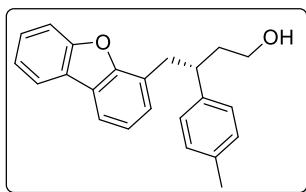

Separation of enantiomers by SFC. Chiralcel® Column OZ-H, 40 °C, *i*-PrOH: CO<sub>2</sub> = 5:95-10:90-15:85-20:80-50:50 (50 min), 2mL/min, 160bar,  $t_1 = 22.2$ ,  $t_2 = 26.0$ ; er = 7:93.

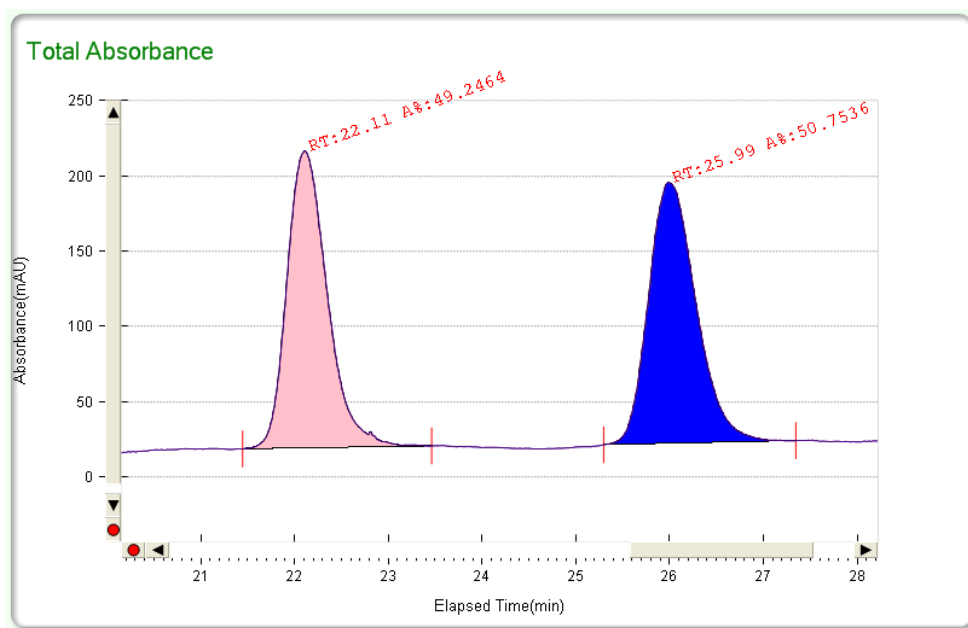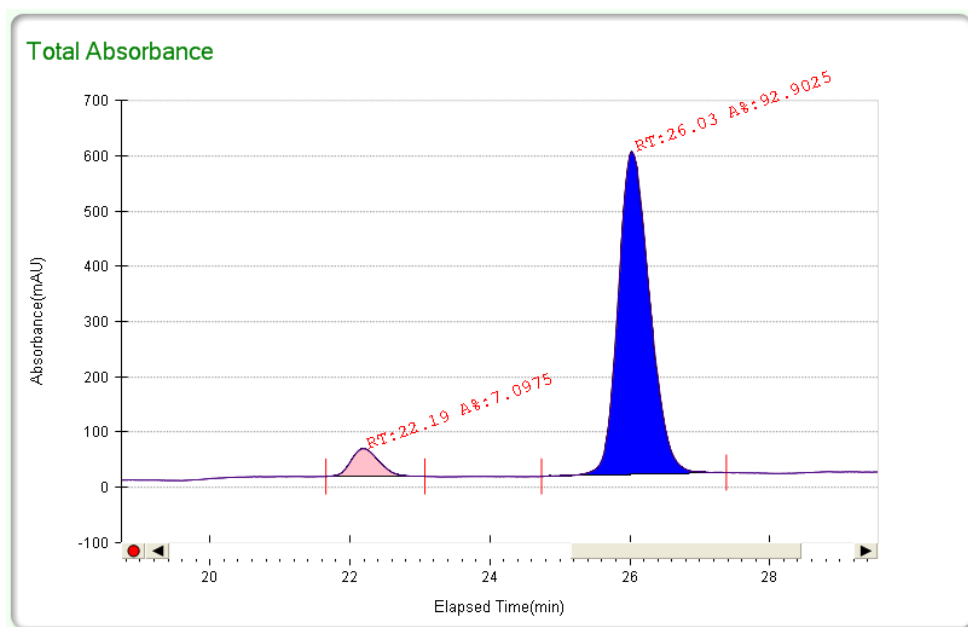

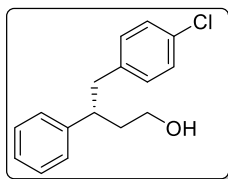

Separation of enantiomers by SFC. Chiralcel® Column AD-H, 40 °C, *i*-PrOH: CO<sub>2</sub> = 5:95-15:85-50:50 (30 min), 2mL/min, 160bar,  $t_1 = 11.3$ ,  $t_2 = 11.8$ ; er = 4.5:95.5.

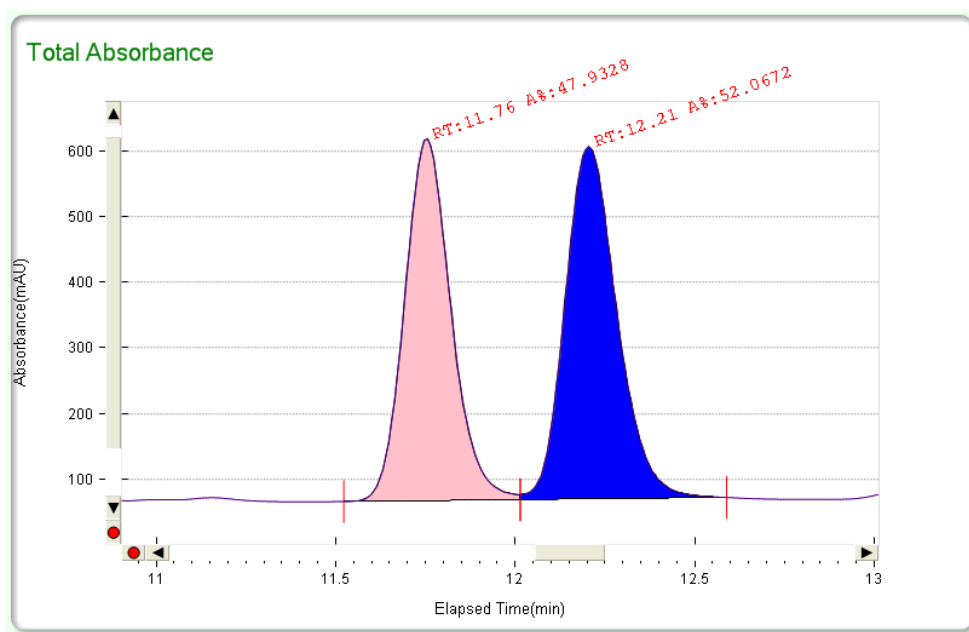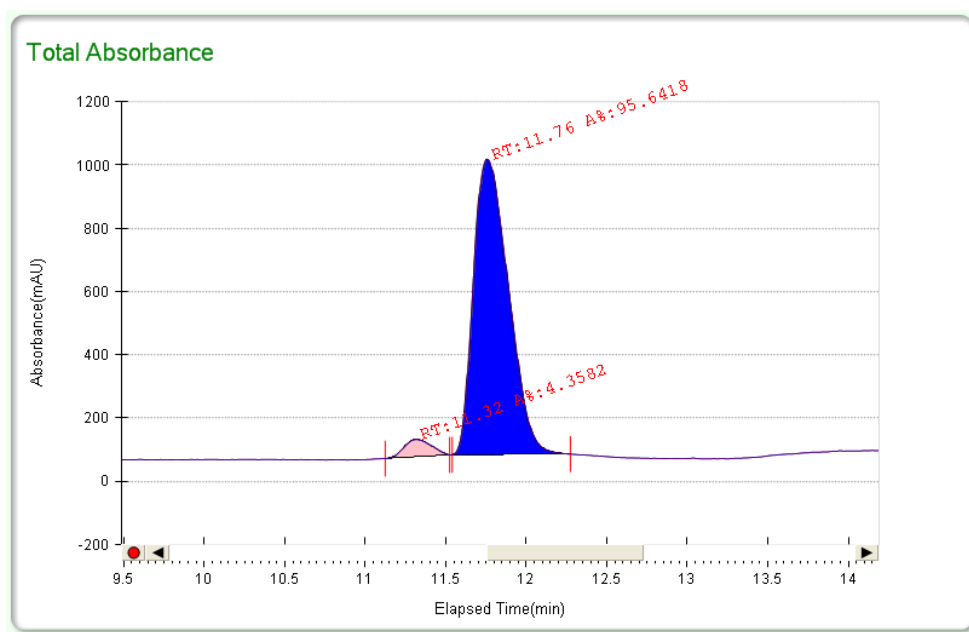

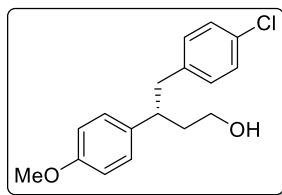

Separation of enantiomers by SFC. Chiralcel® Column OZ-H, 40 °C, *i*-PrOH: CO<sub>2</sub> = 5:95-15:85-50:50 (30 min), 2mL/min, 160bar,  $t_1 = 11.7$ ,  $t_2 = 12.4$ ; er = 3.5:96.5.

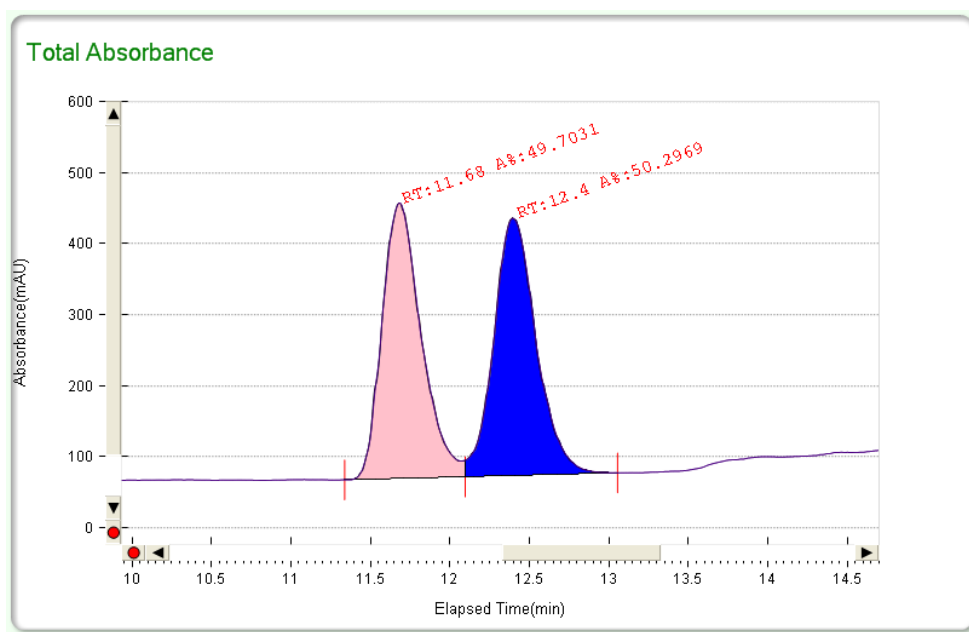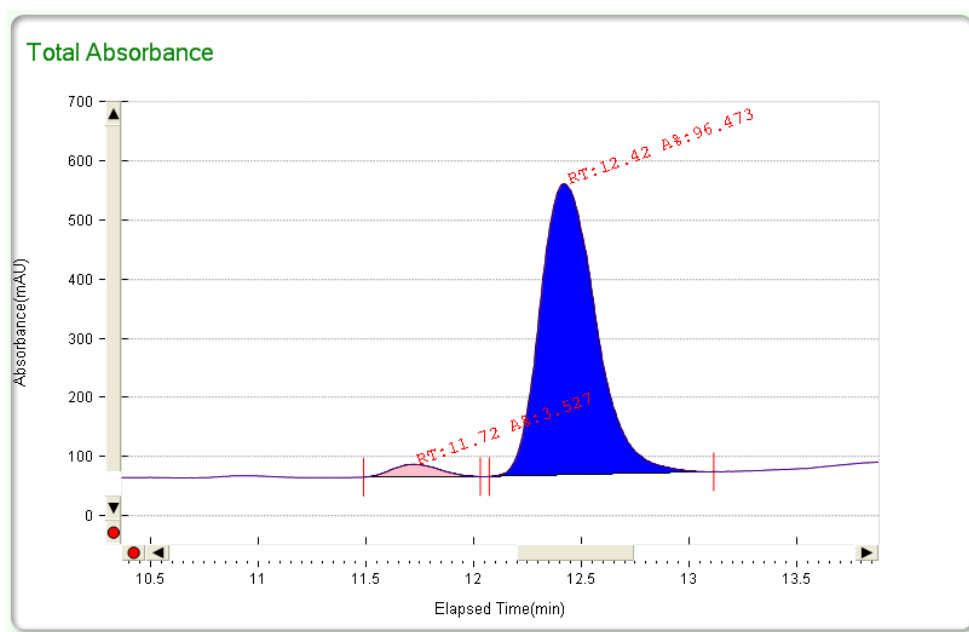

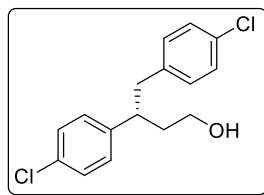

Separation of enantiomers by SFC. Chiralcel® Column OZ-H, 40 °C, *i*-PrOH: CO<sub>2</sub> = 5:95-10:90-15:85 (20 min), 2mL/min, 160bar,  $t_1 = 17.4$ ,  $t_2 = 18.2$ ; er = 8.5:91.5.

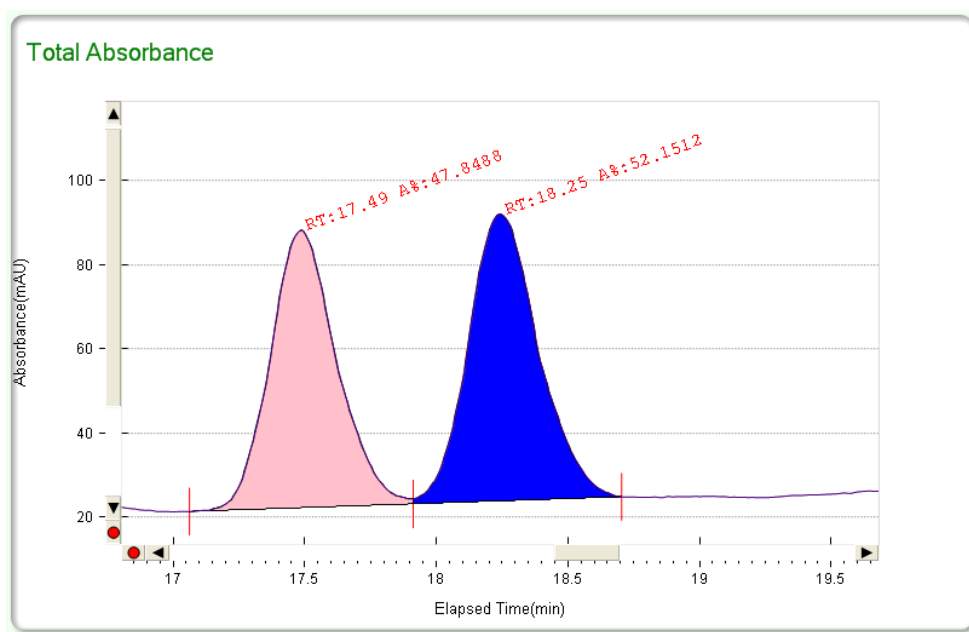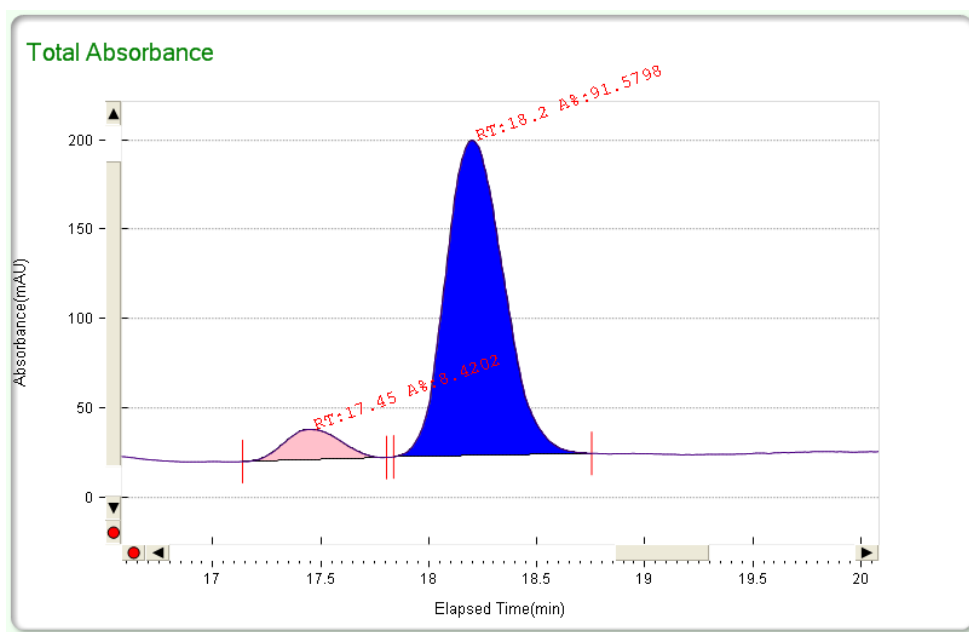

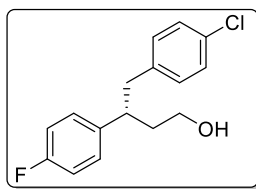

Separation of enantiomers by SFC. Chiralcel® Column AY-H, 40 °C, *i*-PrOH: CO<sub>2</sub> = 5:95-10:90-15:85 (20 min), 2mL/min, 160bar, *t*<sub>1</sub> = 12.8, *t*<sub>2</sub> = 13.6; er = 90:10.

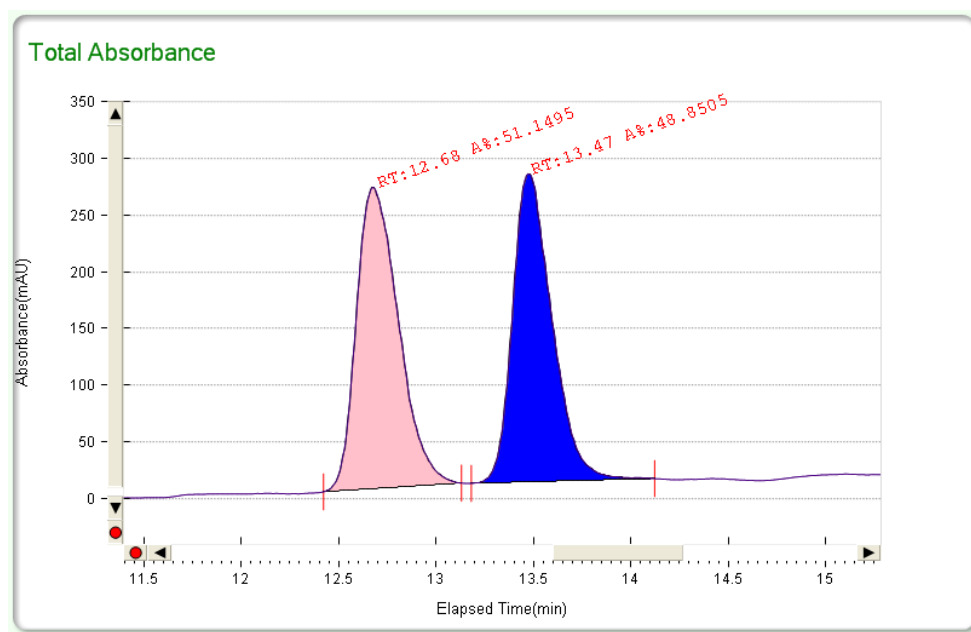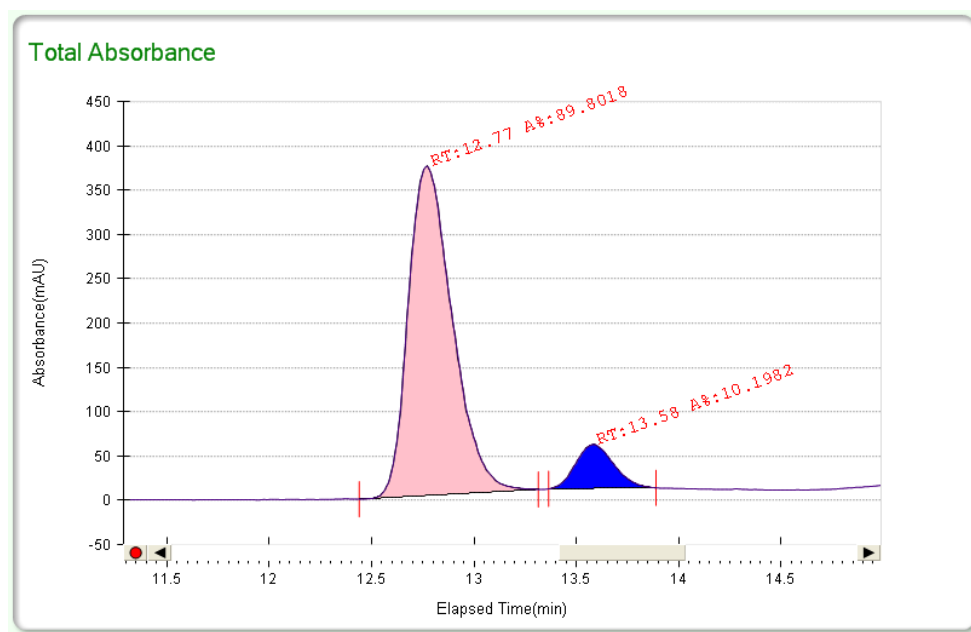

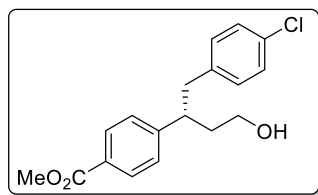

Separation of enantiomers by SFC. Chiralcel® Column OZ-H, 40 °C, *i*-PrOH: CO<sub>2</sub> = 5:95-15:85-50:50 (30 min), 2mL/min, 160bar,  $t_1 = 13.6$ ,  $t_2 = 14.2$ ; er = 6.5:93.5.

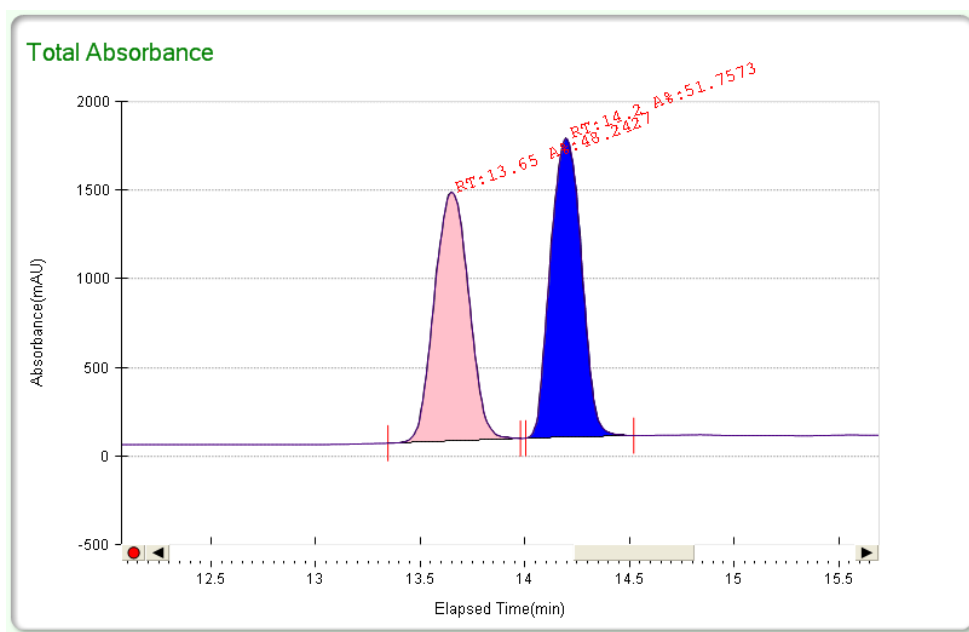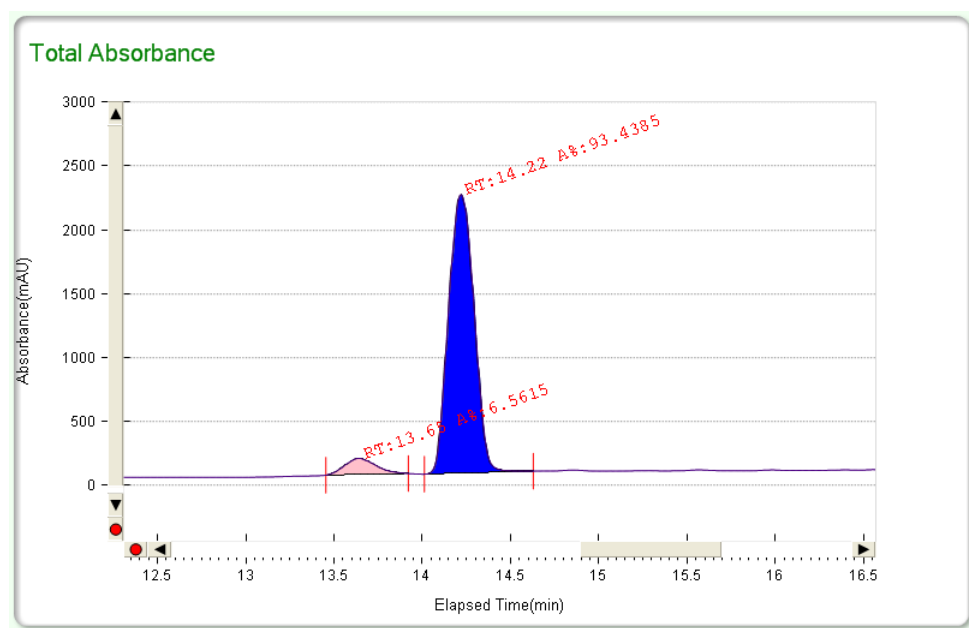



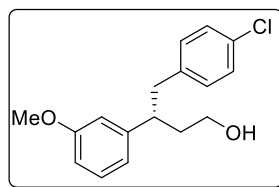

Separation of enantiomers by SFC. Chiralcel® Column AD-H, 40 °C, *i*-PrOH: CO<sub>2</sub> = 5:95-15:85-50:50 (30 min), 2mL/min, 160bar,  $t_1 = 14.1$ ,  $t_2 = 14.5$ ; er = 4:96.

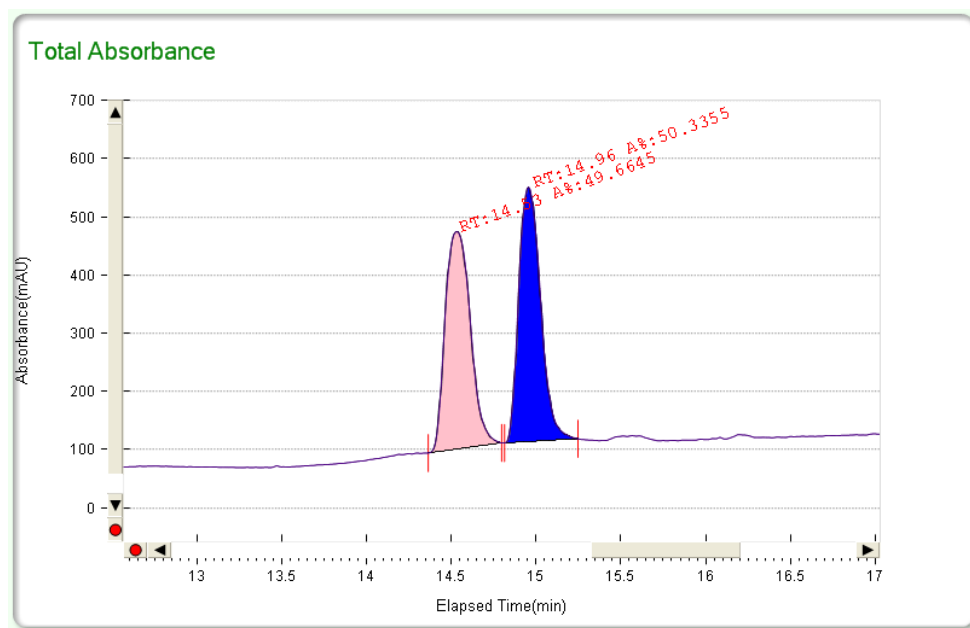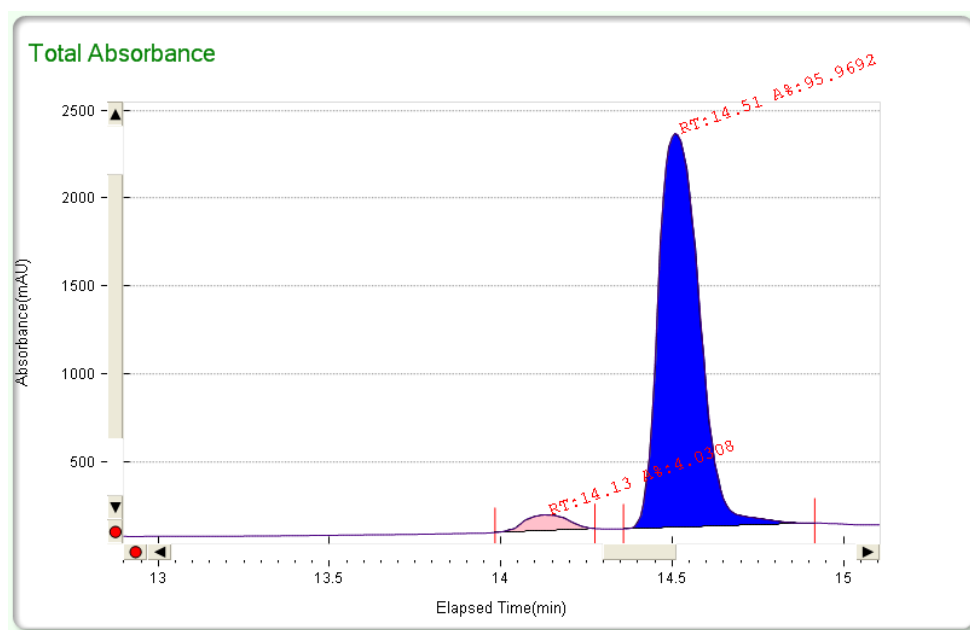

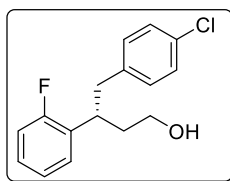

Separation of enantiomers by SFC. Chiralcel® Column OJ-H, 40 °C, *i*-PrOH: CO<sub>2</sub> = 2:98-20:80 (20 min), 2mL/min, 160bar,  $t_1 = 12.8$ ,  $t_2 = 13.9$ ; er = 20:80.

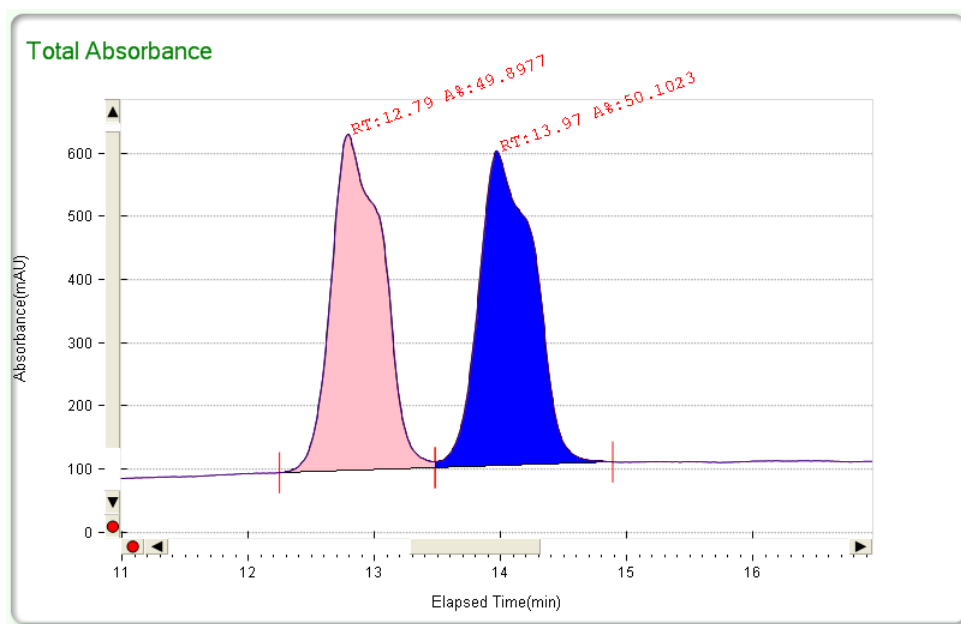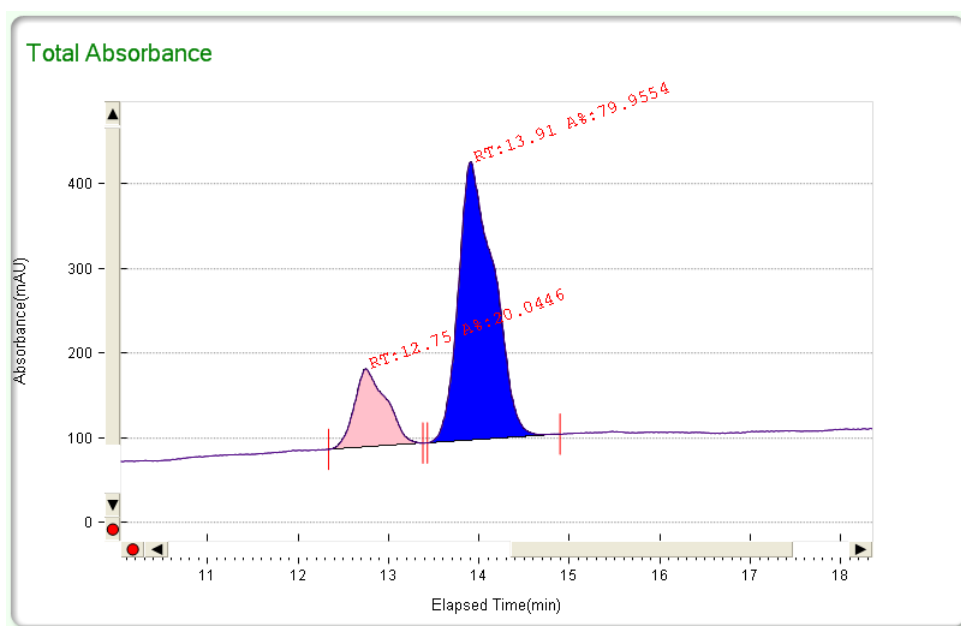

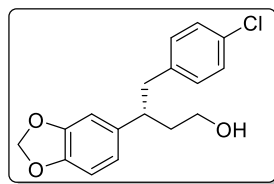

Separation of enantiomers by SFC. Chiralcel® Column OZ-H, 40 °C, *i*-PrOH: CO<sub>2</sub> = 2:98-20:80 (20 min), 2mL/min, 160bar,  $t_1 = 17.0$ ,  $t_2 = 17.6$ ; er = 8.5:91.5.

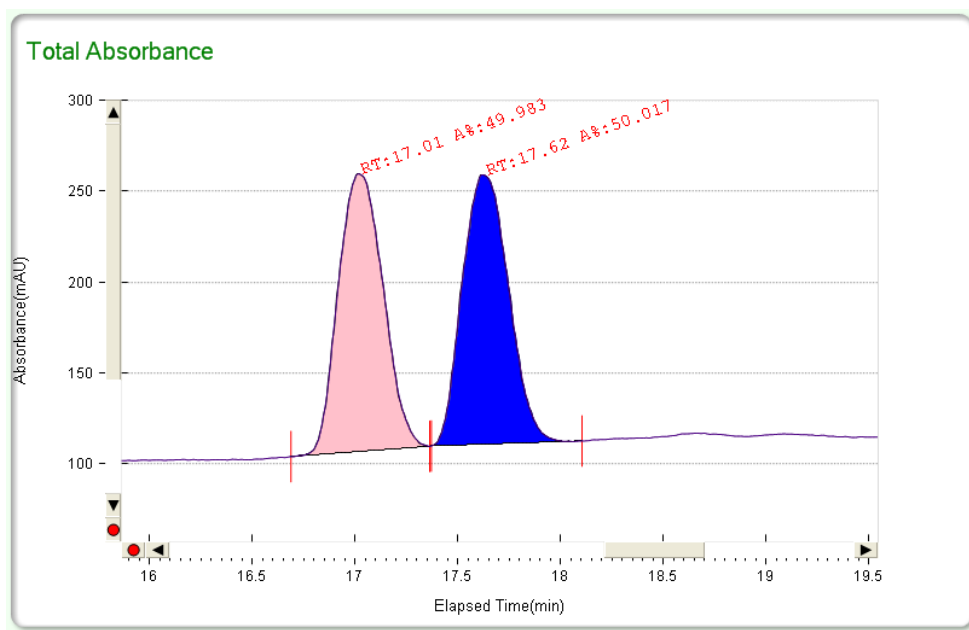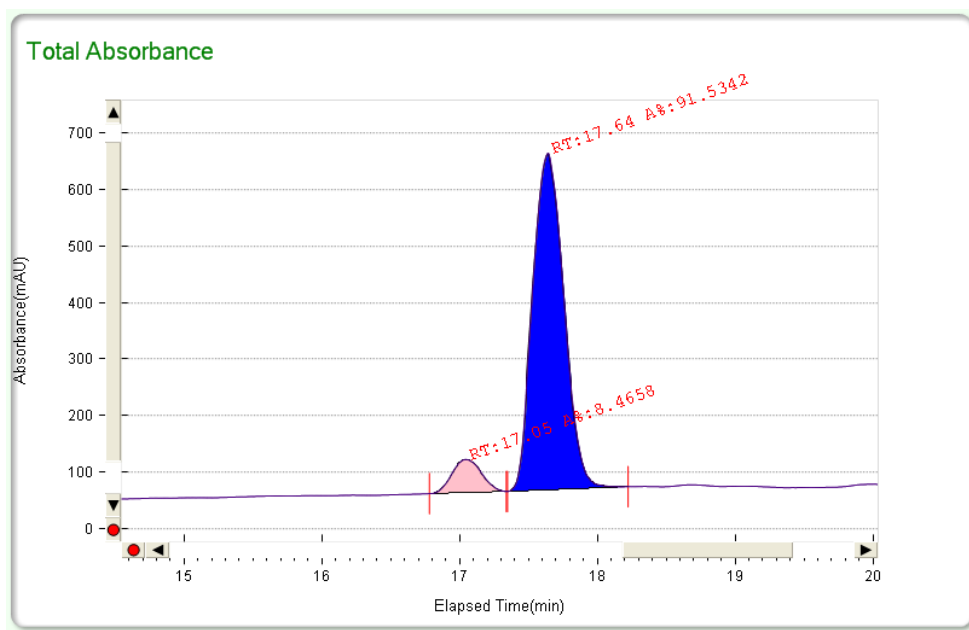

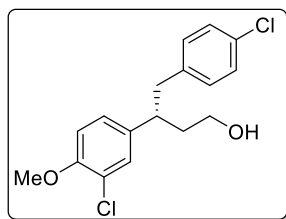

Separation of enantiomers by SFC. Chiralcel® Column AY-H, 40 °C, *i*-PrOH: CO<sub>2</sub> = 5:95-15:85-50:50 (30 min), 2mL/min, 160bar,  $t_1 = 18.1$ ,  $t_2 = 20.3$ ; er = 96:4.

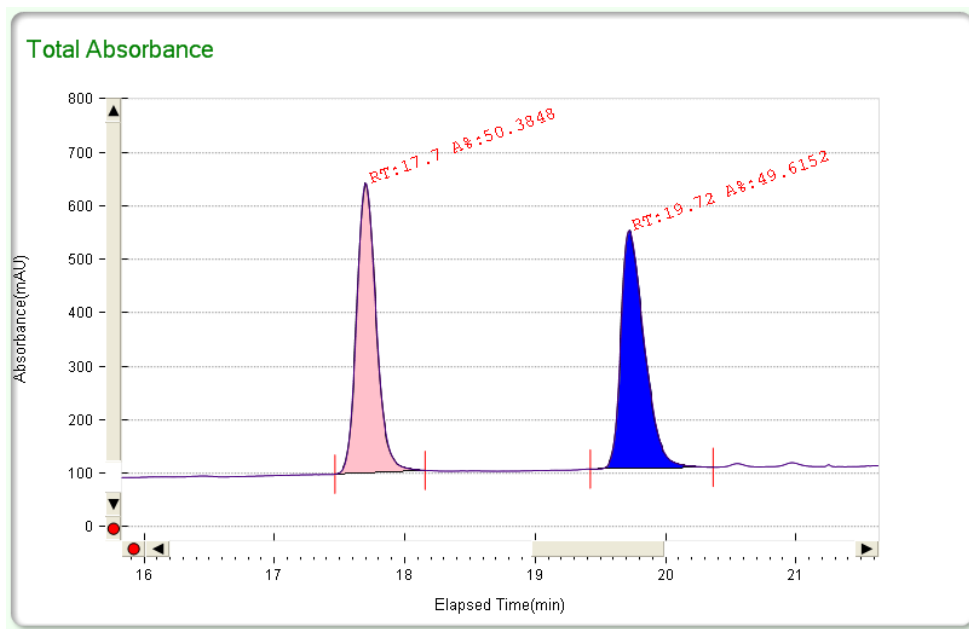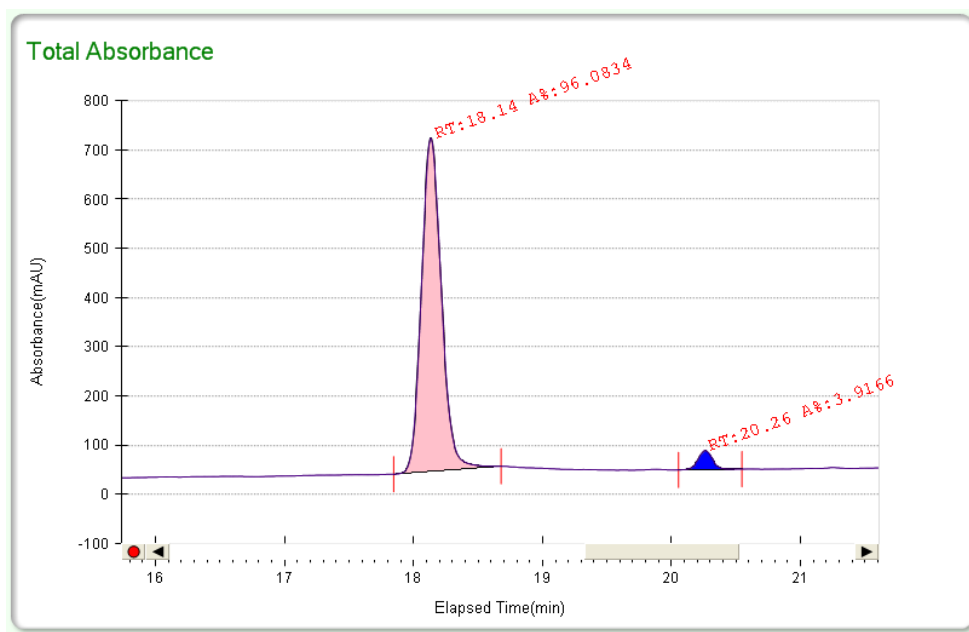

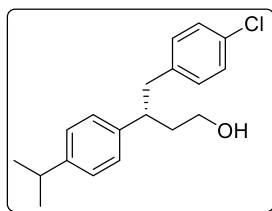

Separation of enantiomers by SFC. Chiralcel® Column OZ-H, 40 °C, *i*-PrOH: CO<sub>2</sub> = 5:95-10:90-15:85 (20 min), 2mL/min, 160bar,  $t_1 = 17.4$ ,  $t_2 = 18.3$ ; er = 5:95.

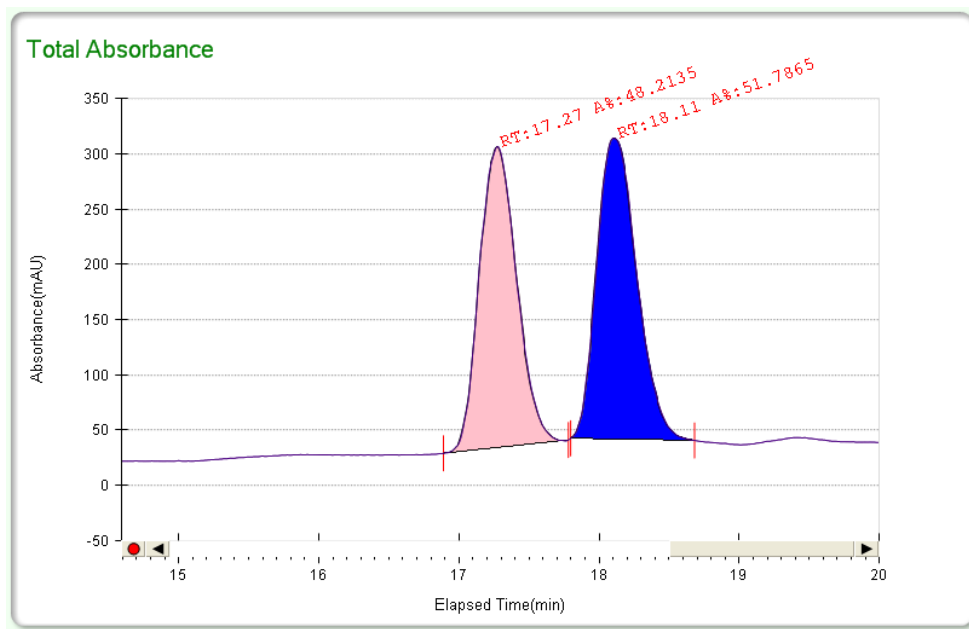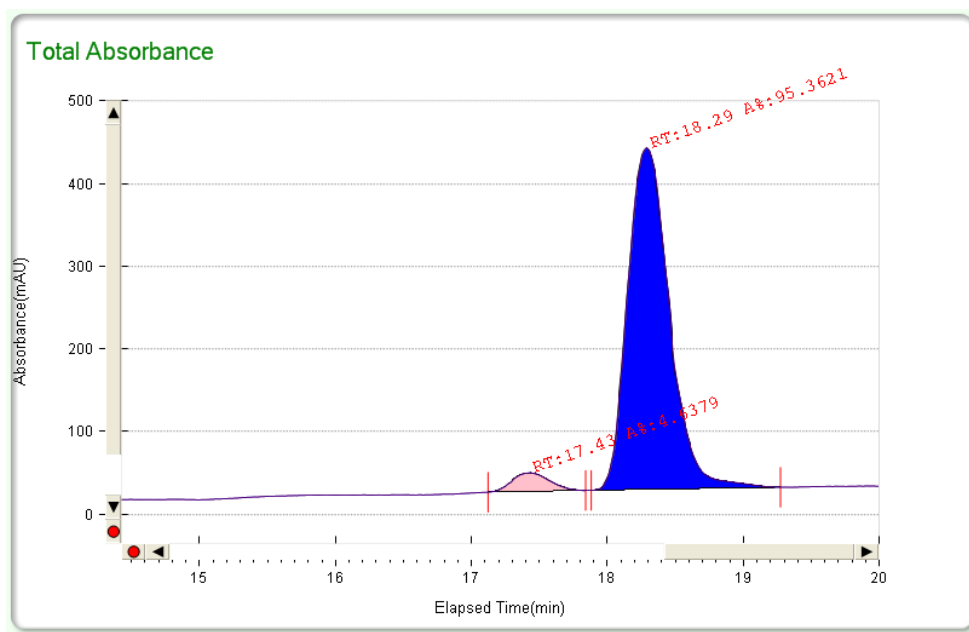

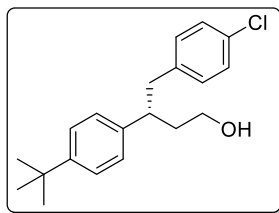

Separation of enantiomers by SFC. Chiralcel® Column AY-H, 40 °C, *i*-PrOH: CO<sub>2</sub> = 5:95-10:90-15:85 (20 min), 2mL/min, 160bar, *t*<sub>1</sub> = 12.8, *t*<sub>2</sub> = 13.9; er = 95:5.

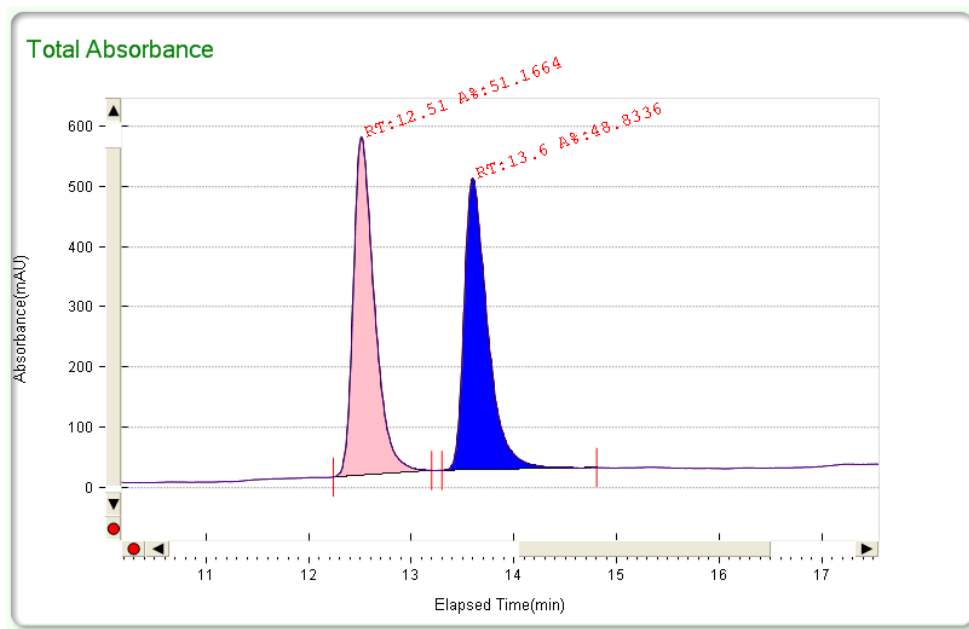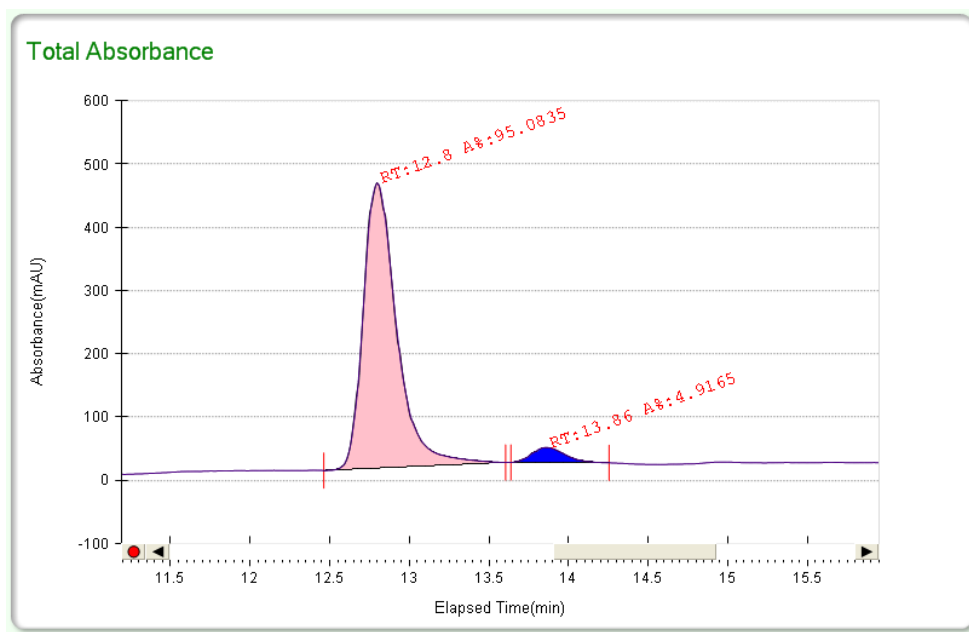

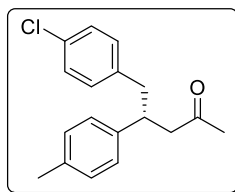

Separation of enantiomers by SFC. Chiralcel® Column AY-H, 40 °C, *i*-PrOH: CO<sub>2</sub> = 5:95 (30 min), 3mL/min, 180bar,  $t_1 = 4.4$ ,  $t_2 = 4.9$ ; er = 95.5:4.5.

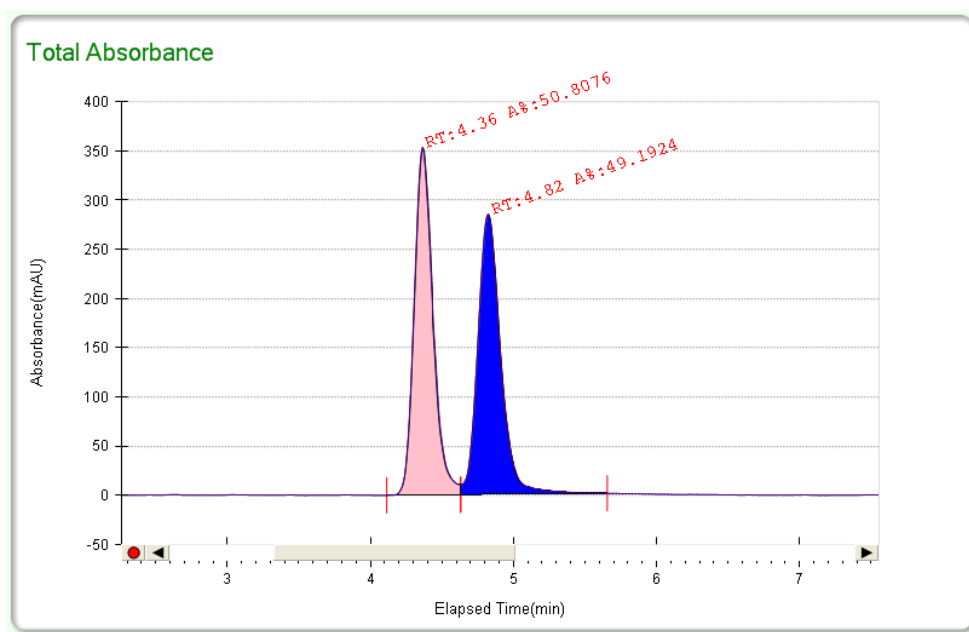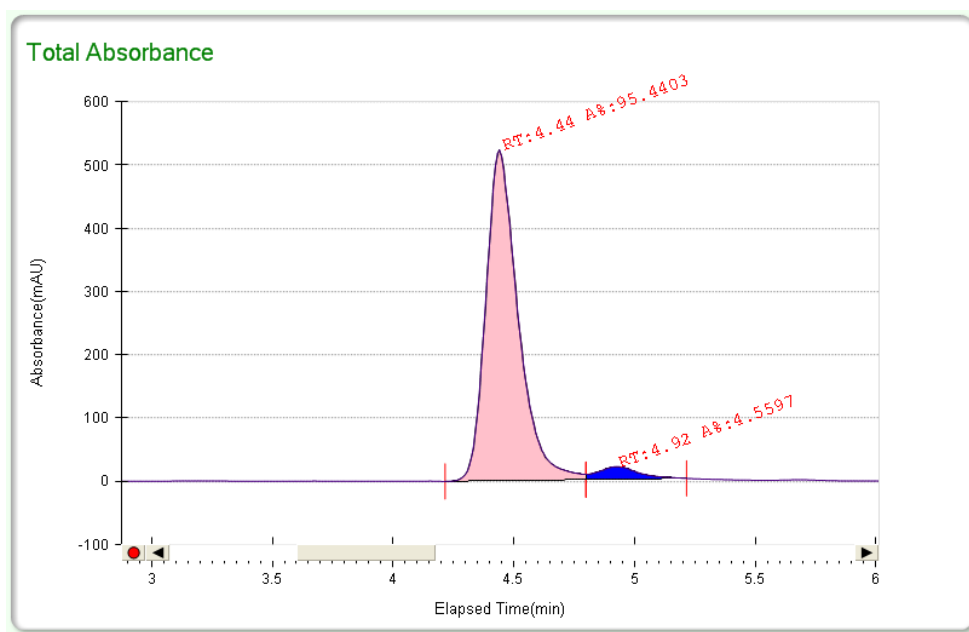

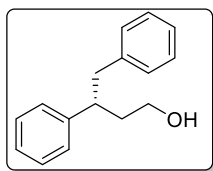

Separation of enantiomers by SFC. Chiralcel® Column OJ-H, 40 °C, *i*-PrOH: CO<sub>2</sub> = 2:98-20:80 (20 min), 2mL/min, 160bar,  $t_1 = 13.0$ ,  $t_2 = 14.4$ ; er = 5:95.

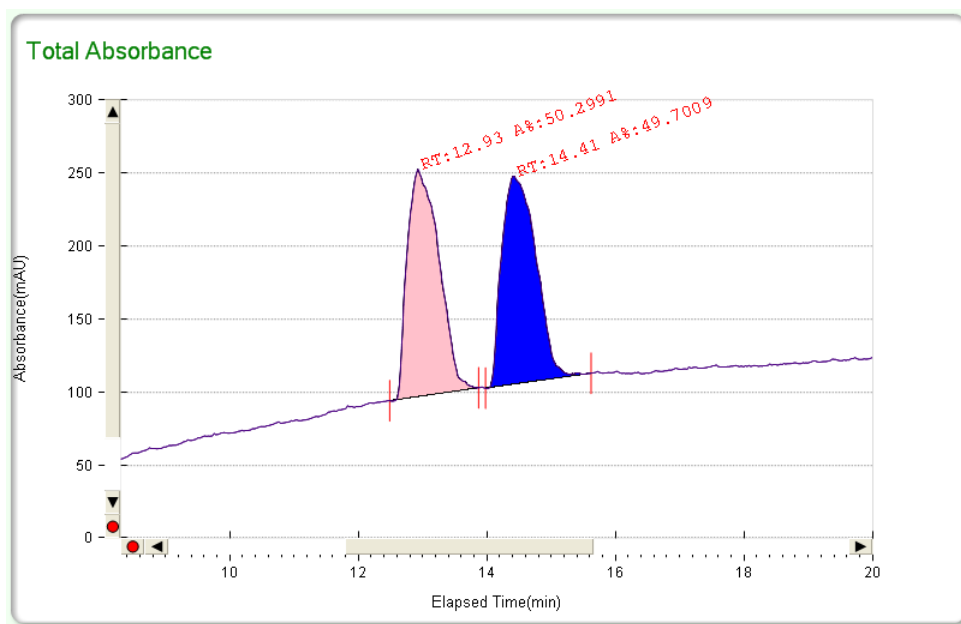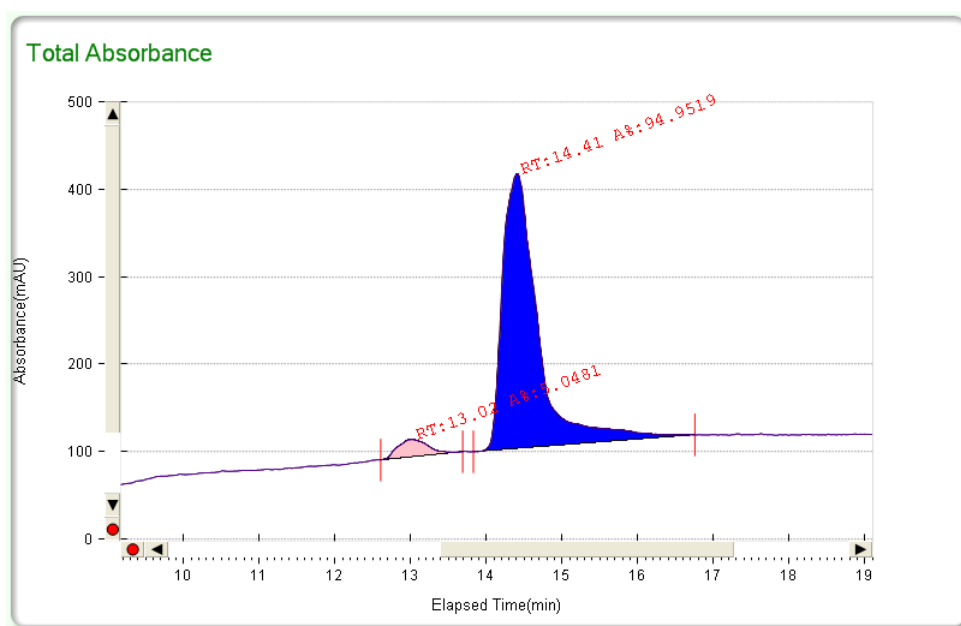



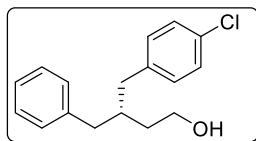

Separation of enantiomers by SFC. Chiralcel® Column AY-H, 40 °C, *i*-PrOH: CO<sub>2</sub> = 2:98-20:80 (20 min), 2mL/min, 160bar,  $t_1 = 13.6$ ,  $t_2 = 13.9$ ; er = 30.5:69.5.

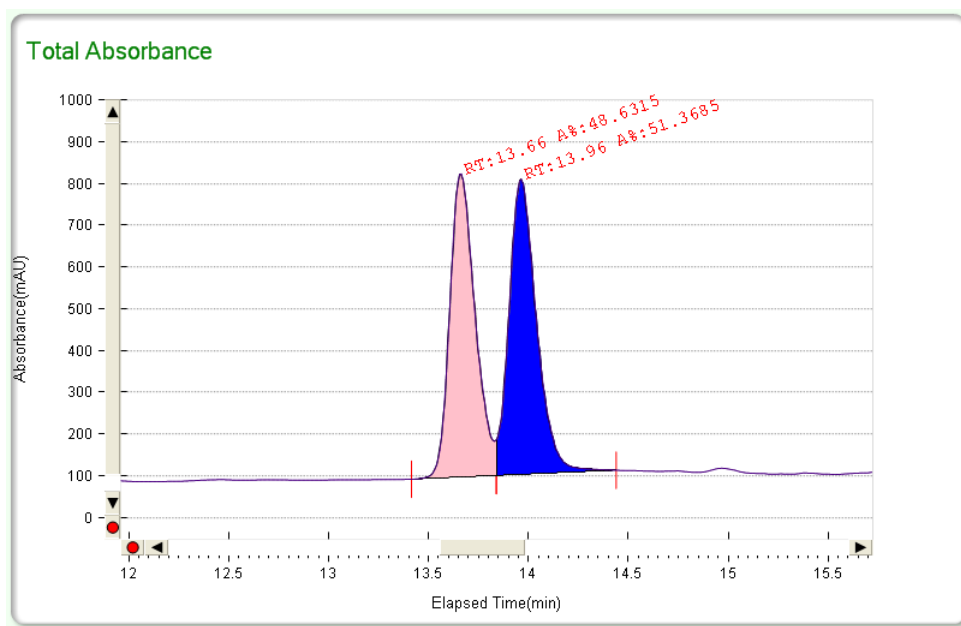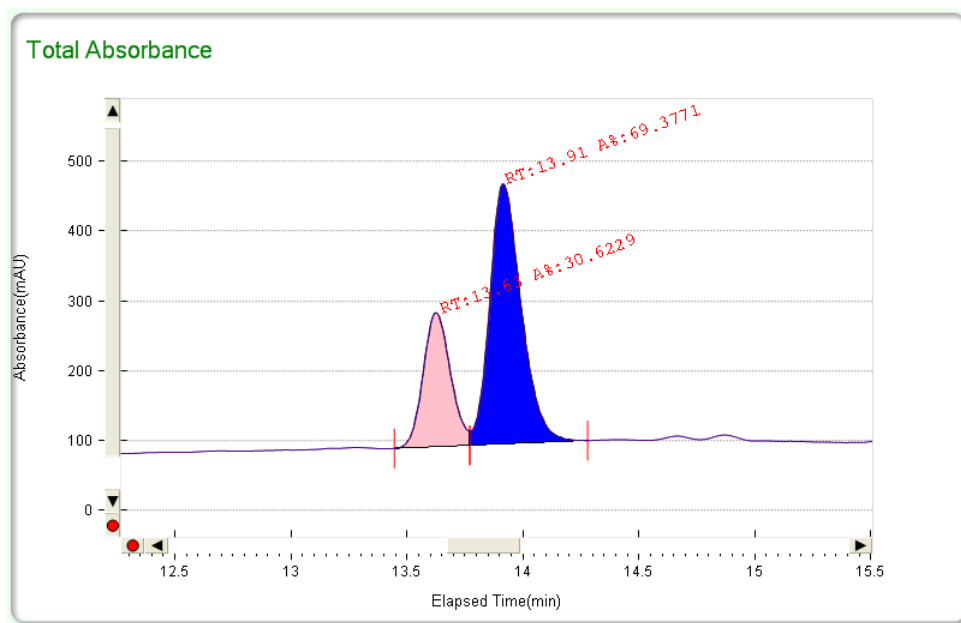

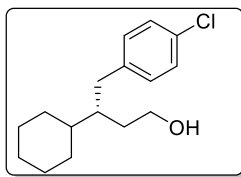

Separation of enantiomers by SFC. Chiralcel® Column AS-H, 40 °C, *i*-PrOH: CO<sub>2</sub> = 5:95-10:90-15:85 (20 min), 2mL/min, 160bar,  $t_1 = 13.4$ ,  $t_2 = 14.3$ ; er = 32.5:67.5.

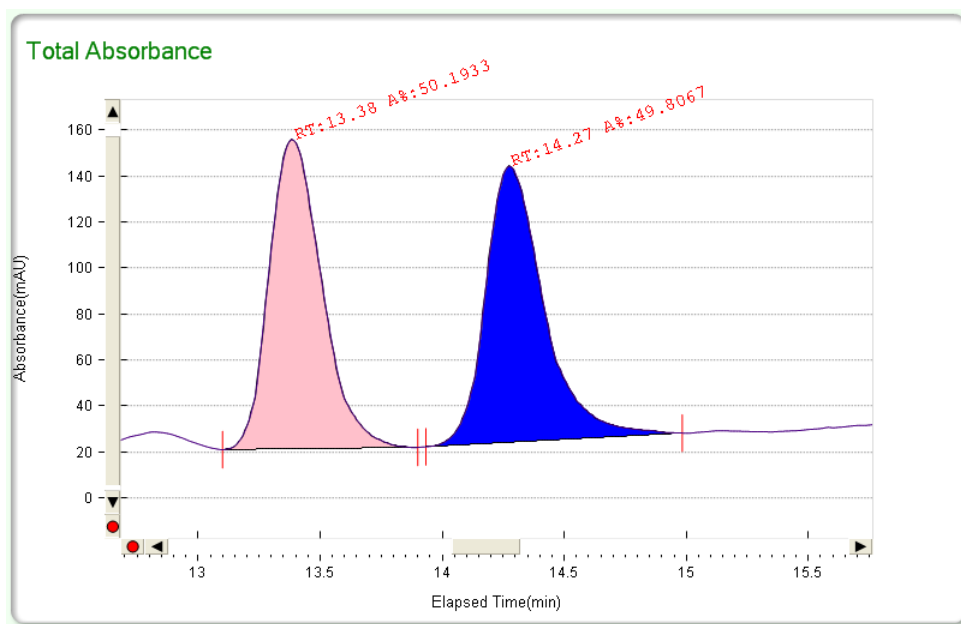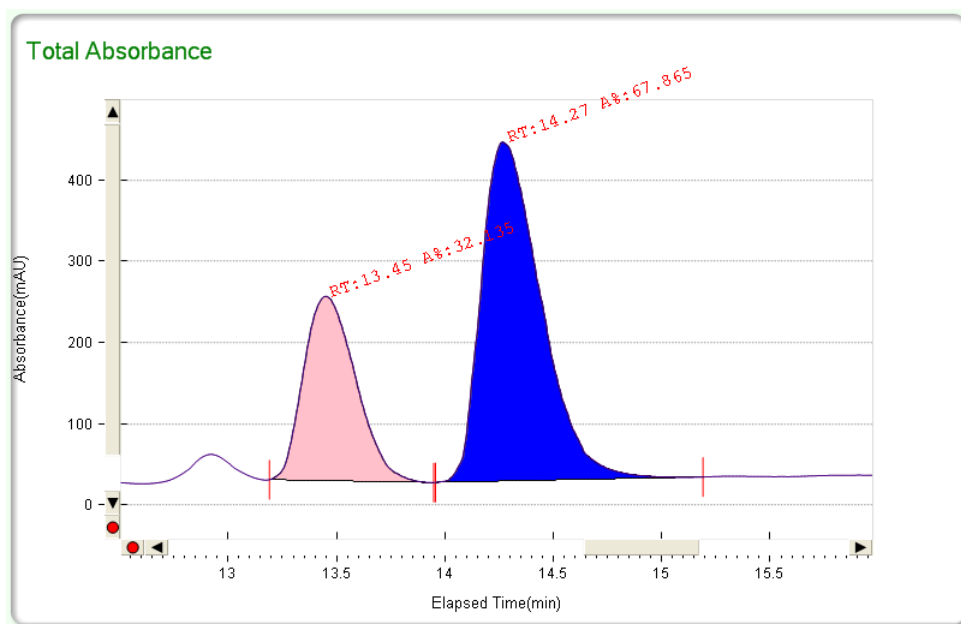

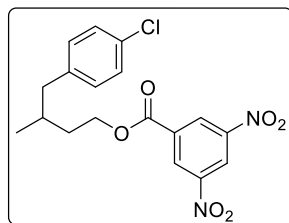

Separation of enantiomers by SFC. Chiralcel® Column AY-H, 40 °C, *i*-PrOH: CO<sub>2</sub> = 2:98-20:80 (20 min), 2mL/min, 160bar,  $t_1 = 22.1$ ,  $t_2 = 22.3$ ; er = 51.5:48.5.

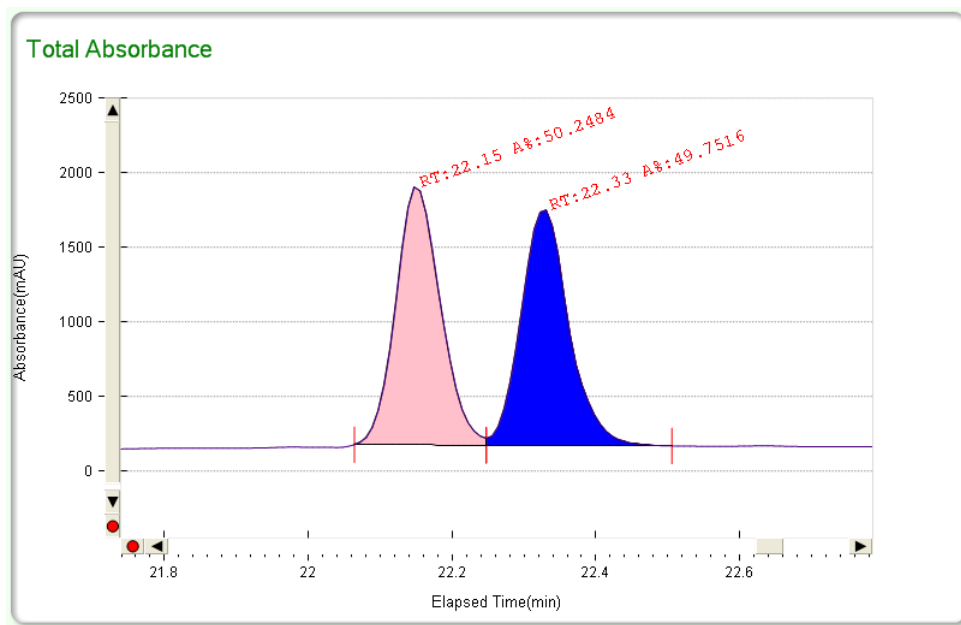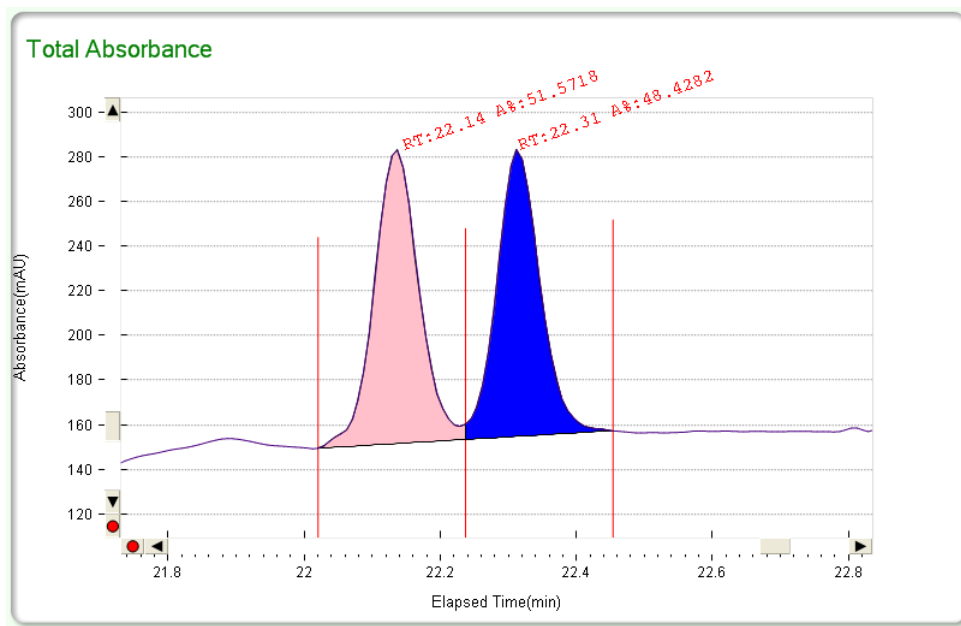

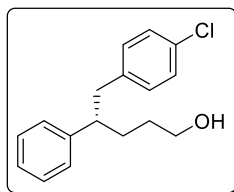

Separation of enantiomers by SFC. Chiralcel® Column AY-H, 40 °C, *i*-PrOH: CO<sub>2</sub> = 5:95-10:90-20:80-50:50 (50 min), 2mL/min, 160bar,  $t_1 = 17.5$ ,  $t_2 = 18.6$ ; er = 88.5:11.5.

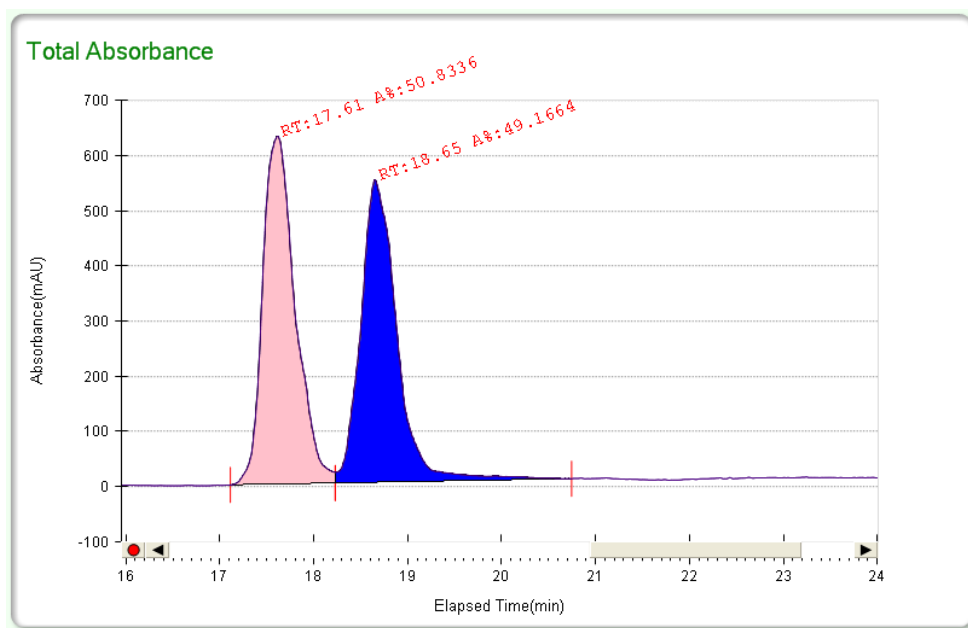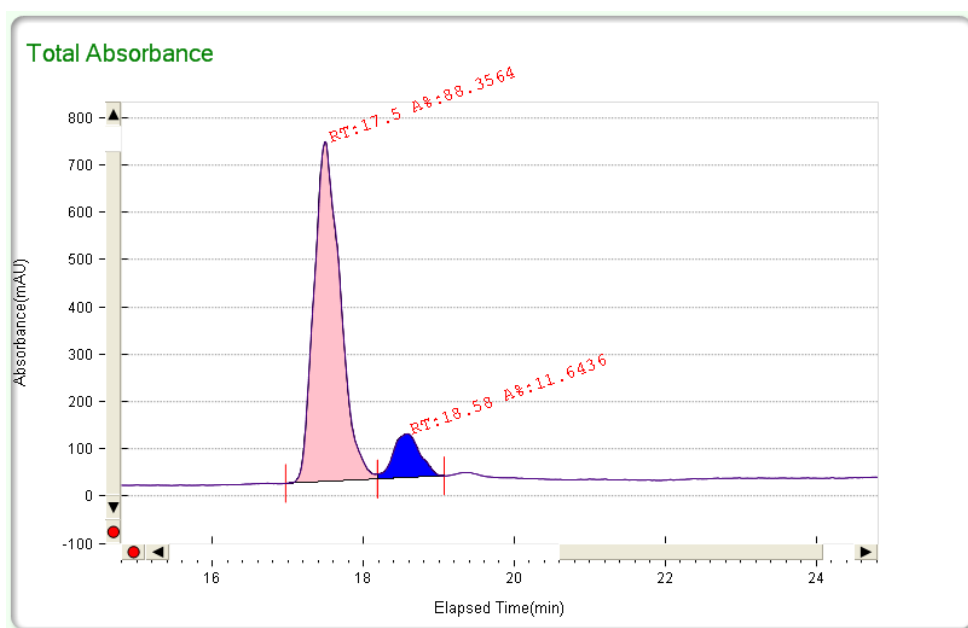

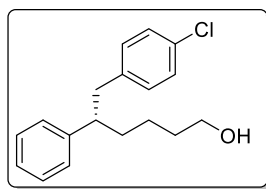

Separation of enantiomers by SFC. Chiralcel® Column OJ-H, 40 °C, *i*-PrOH: CO<sub>2</sub> = 5:95-10:90-15:85 (20 min), 2mL/min, 160bar,  $t_1 = 21.6$ ,  $t_2 = 23.6$ ; er = 19:81.

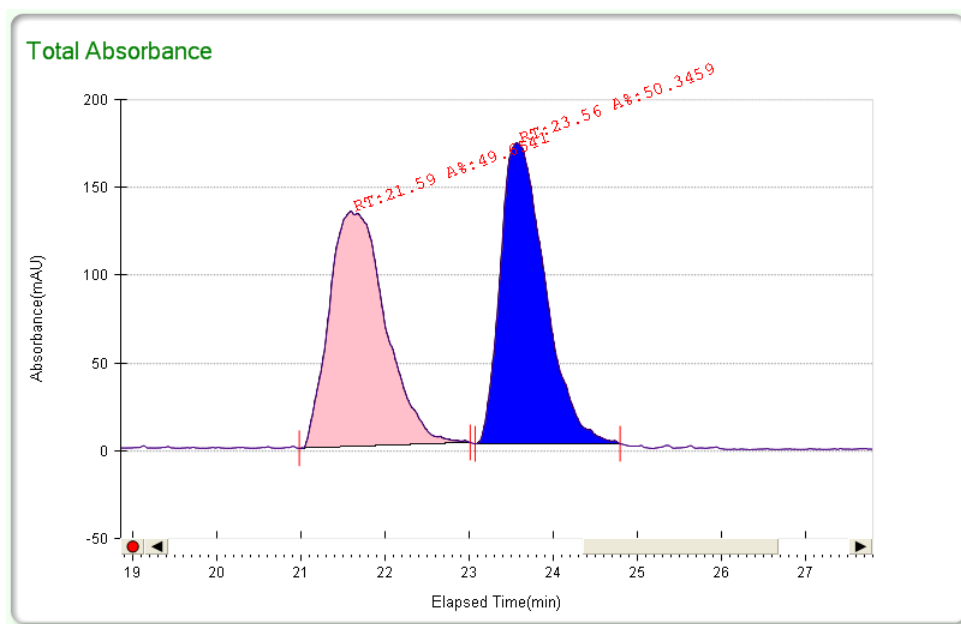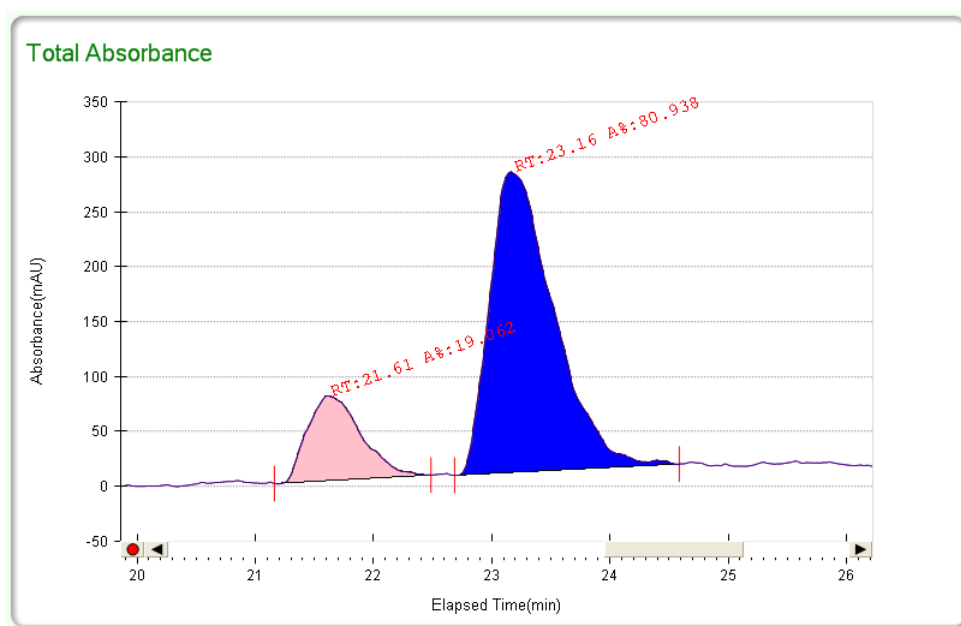

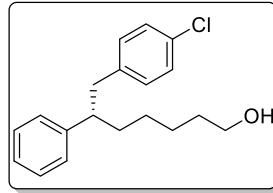

Separation of enantiomers by SFC. Chiralcel® Column OJ-H, 40 °C, *i*-PrOH: CO<sub>2</sub> = 5:95-15:85-50:50 (30 min), 2mL/min, 160bar,  $t_1 = 11.0$ ,  $t_2 = 13.4$ ; er = 22:78.

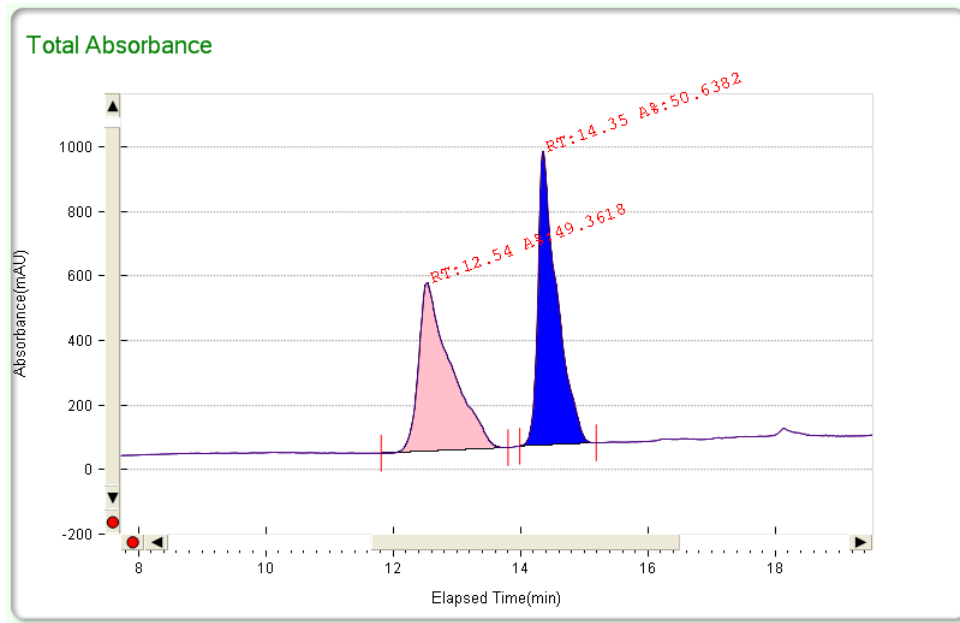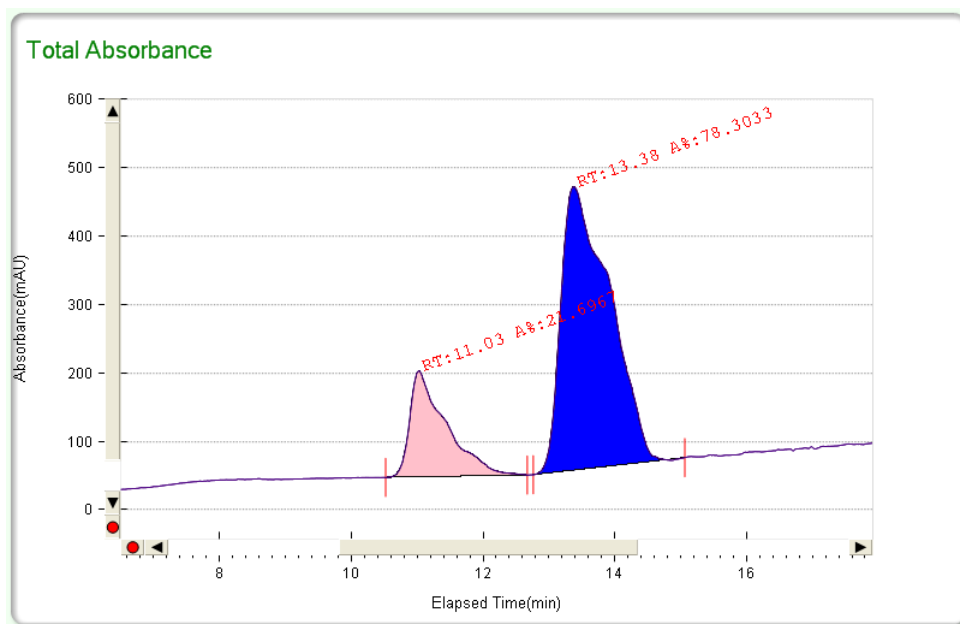

zhimin-23082015-2-300-H  
UofUtah Unity300 NMR  
STANDARD 1H OBSERVE

9.03  
9.03  
8.36  
8.33  
8.06  
8.06  
8.04  
8.03  
7.39  
7.38  
7.37  
7.36  
7.36  
7.34  
7.32  
7.31  
7.30  
7.29  
7.29  
5.57  
5.54  
5.38  
5.35

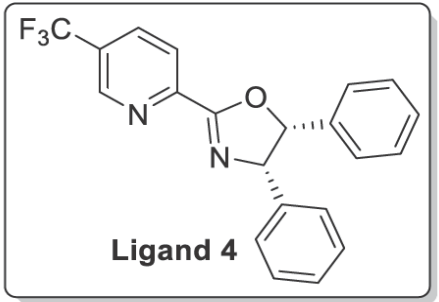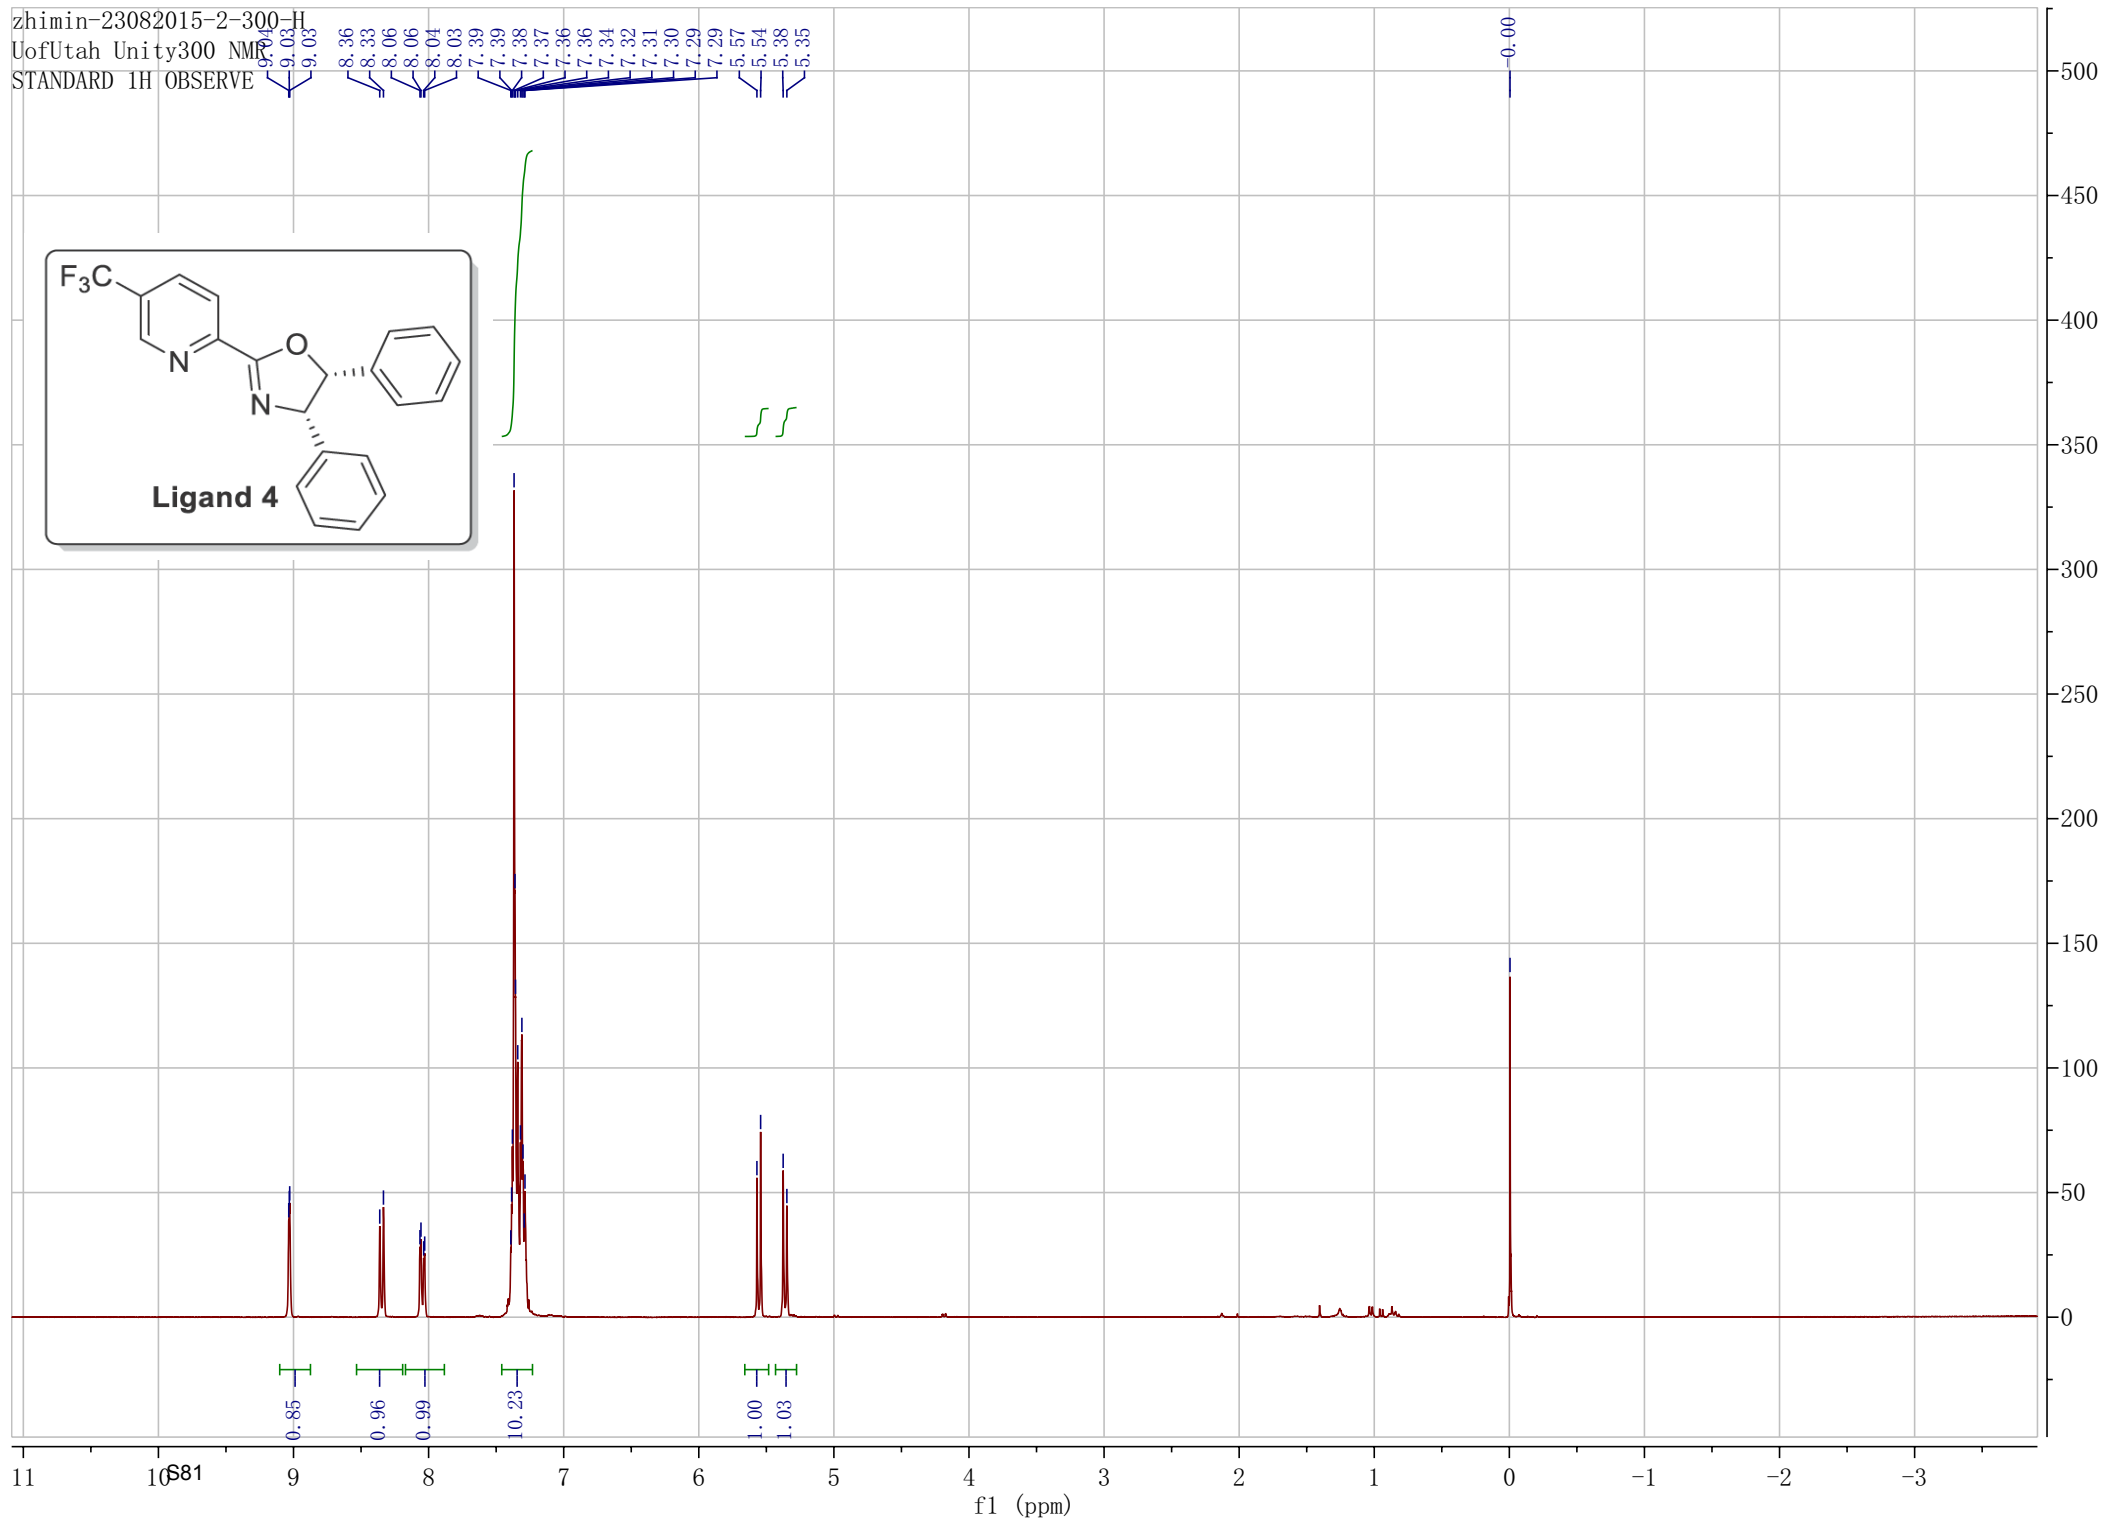

zhimin-czmlp12-300-C  
13C OBSERVE

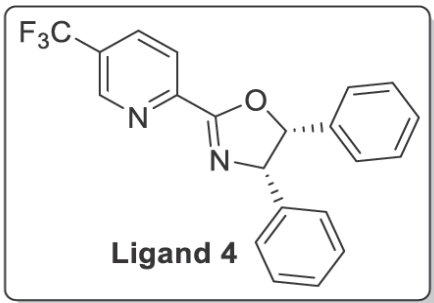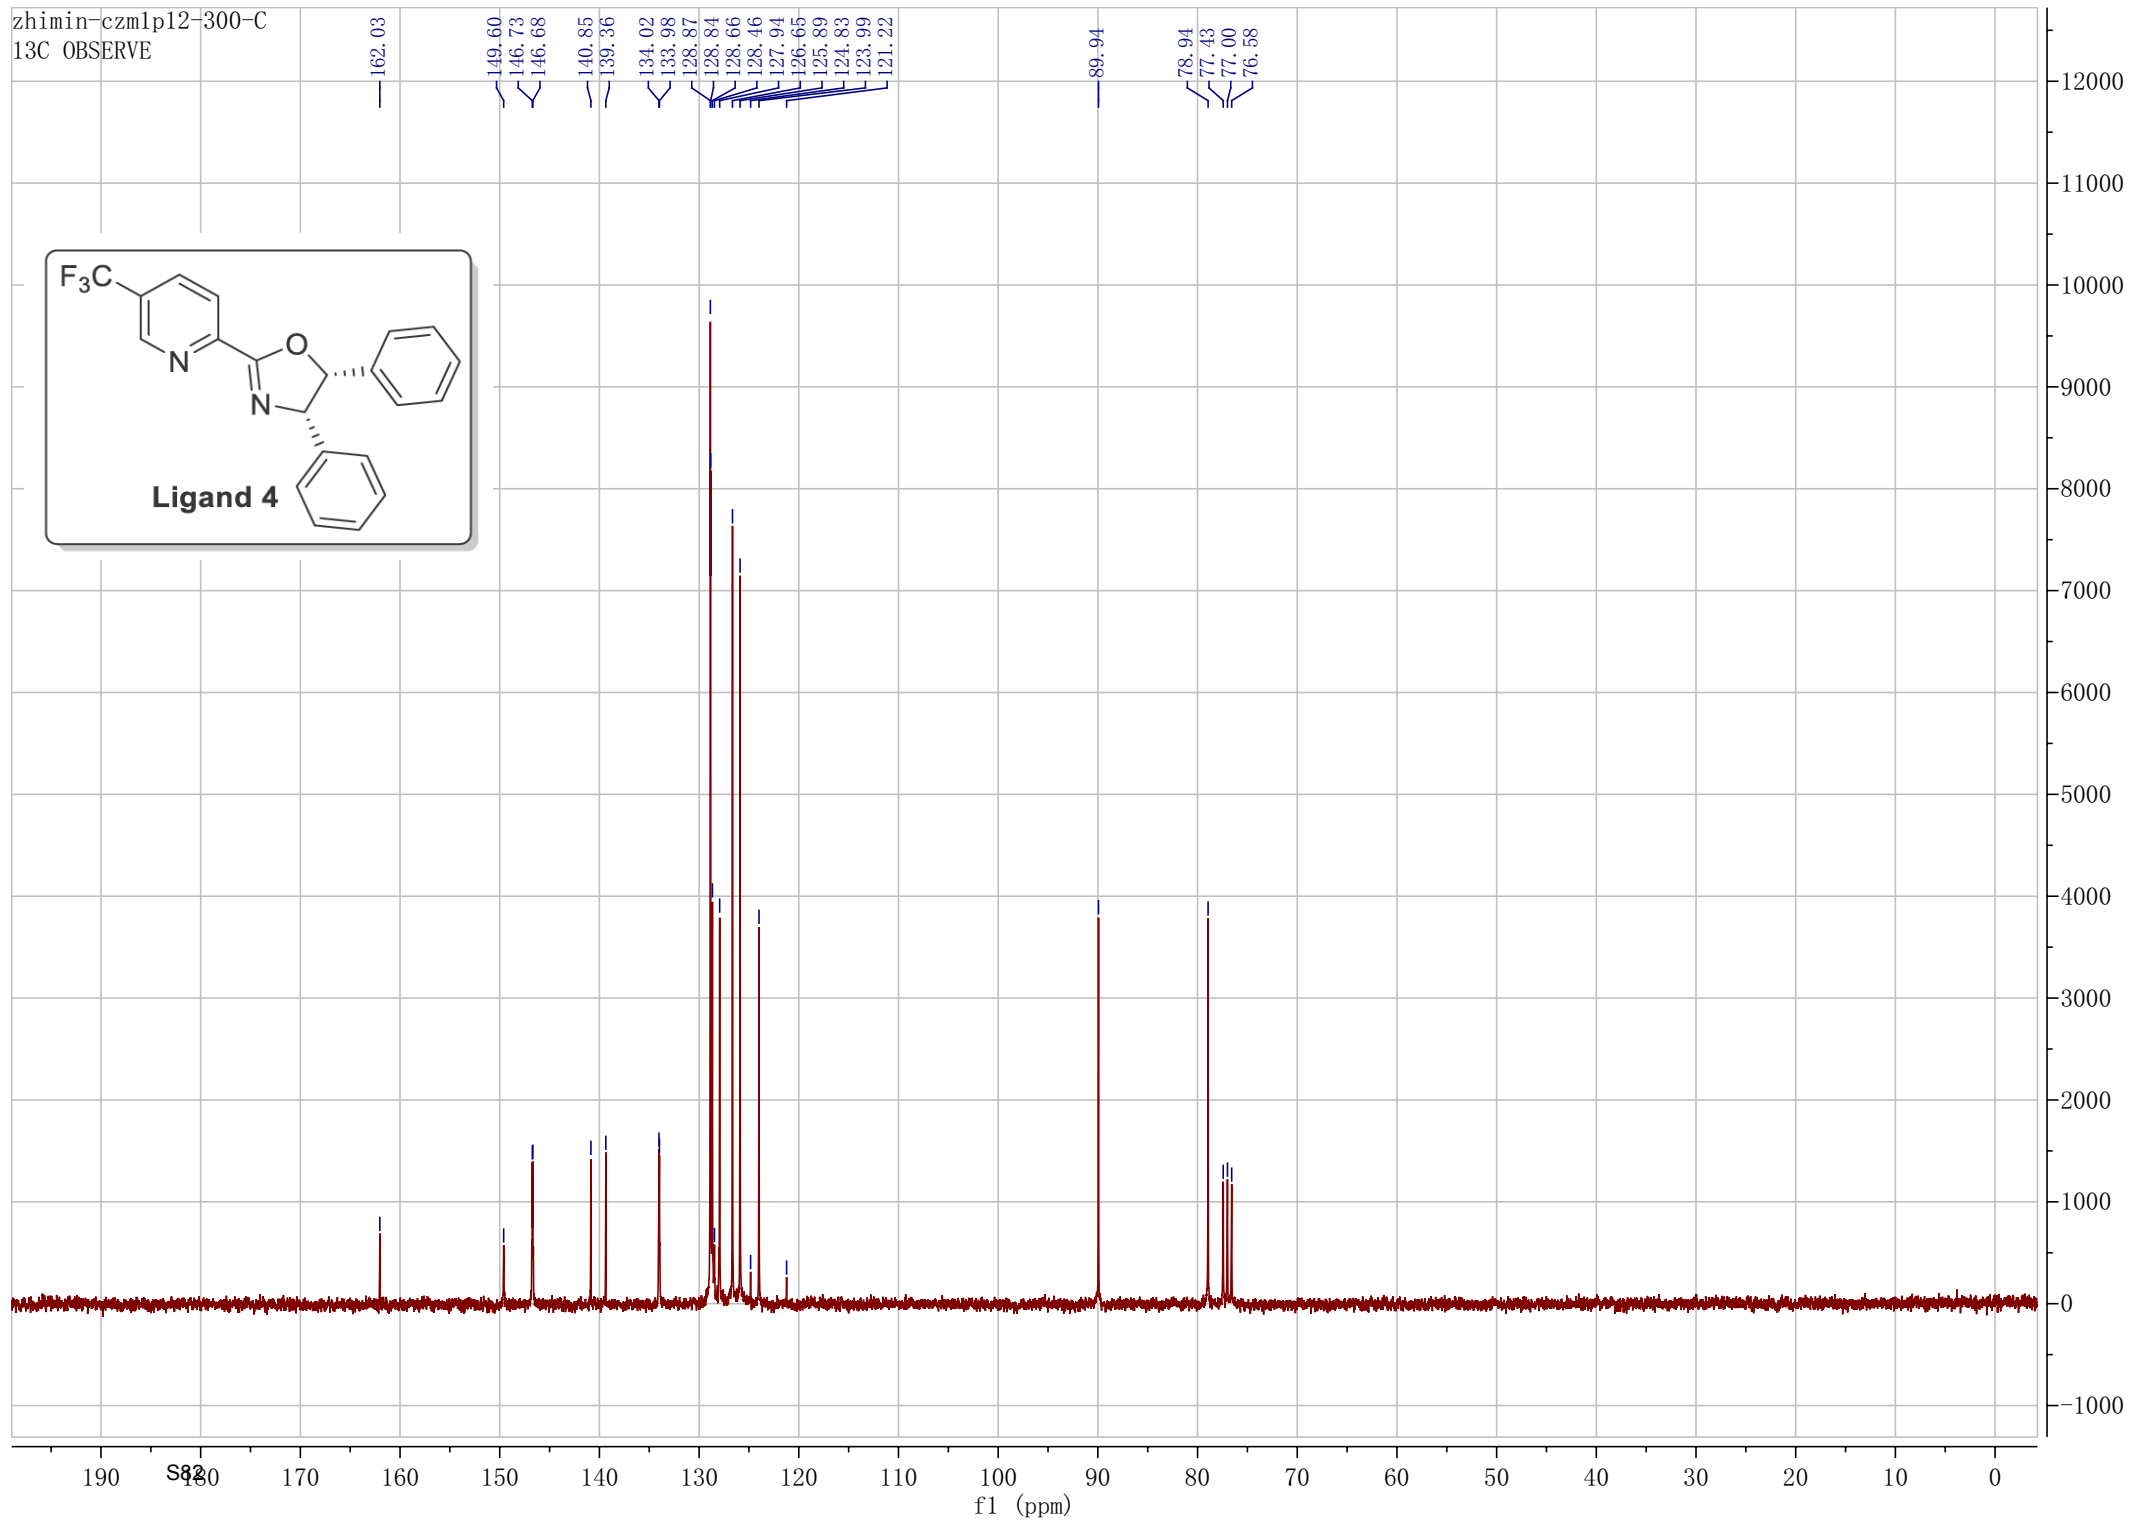



zhimin-czm1p12-300-F  
19F OBSERVE  
STANDARD PARAMETERS

— 62.94

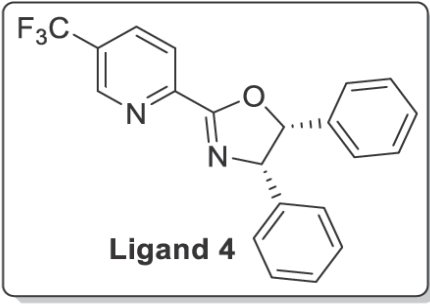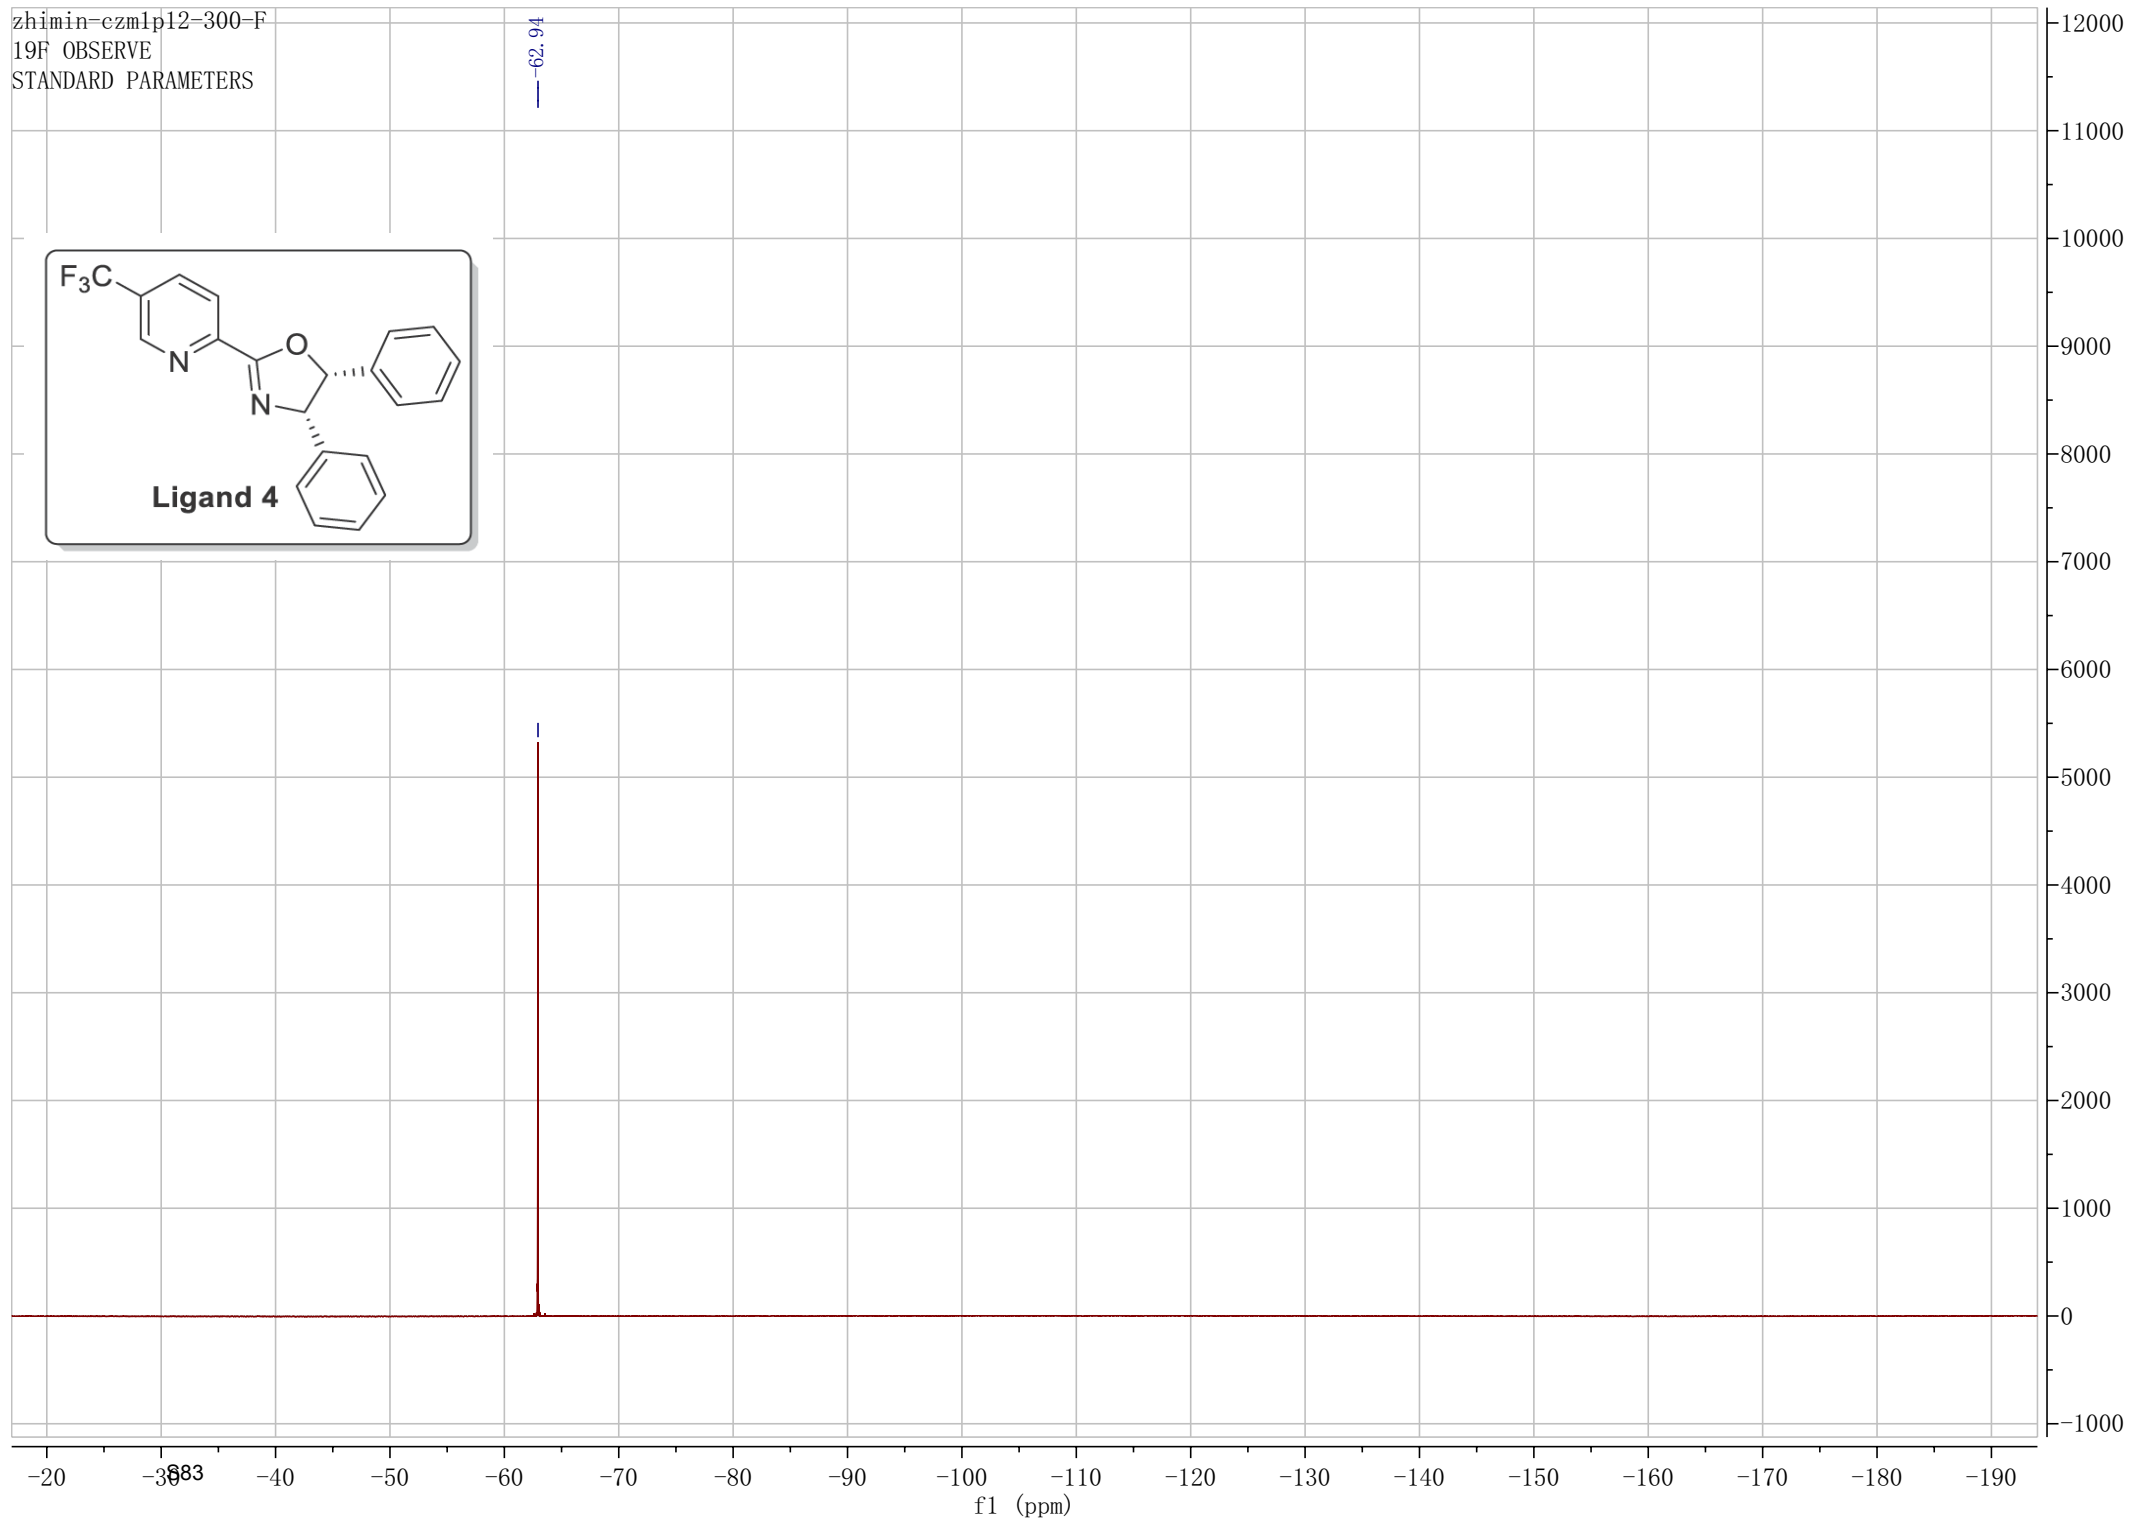

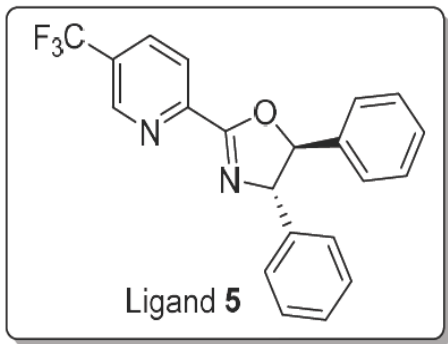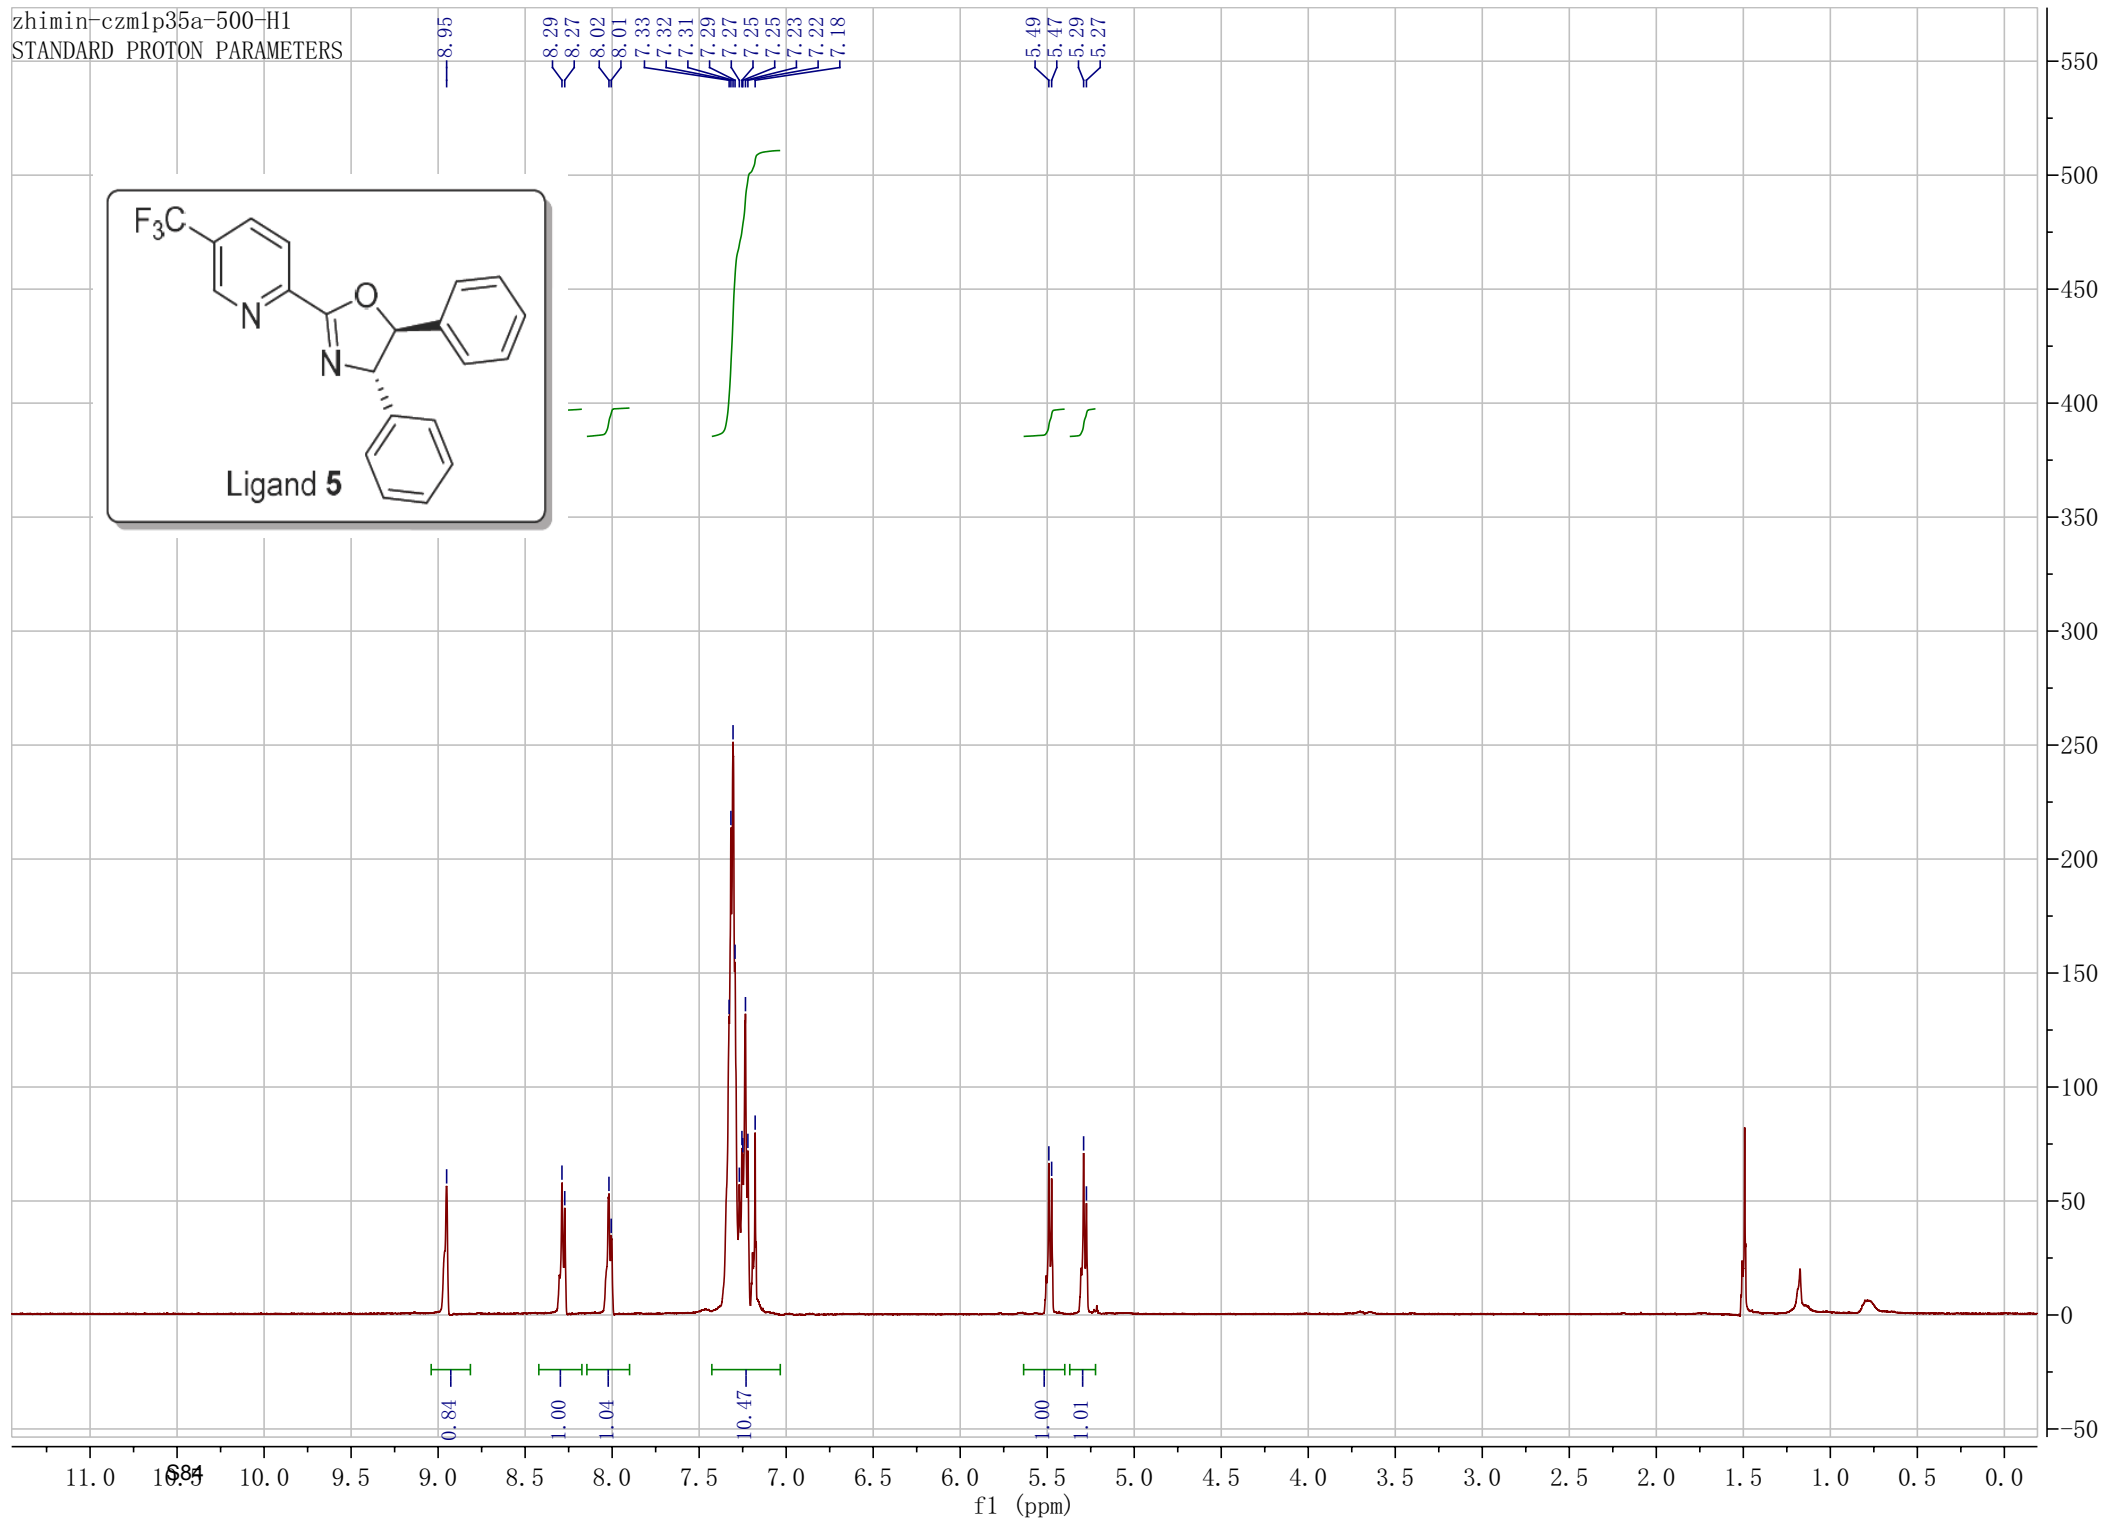

zhimin-czmlp35a-ligand-300-C3  
13C OBSERVE

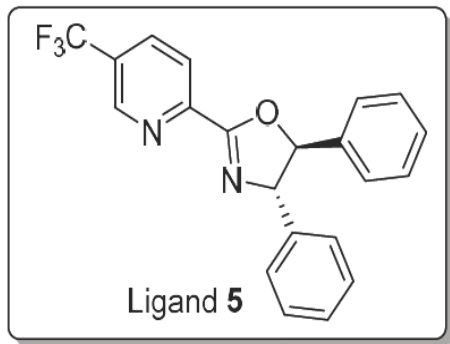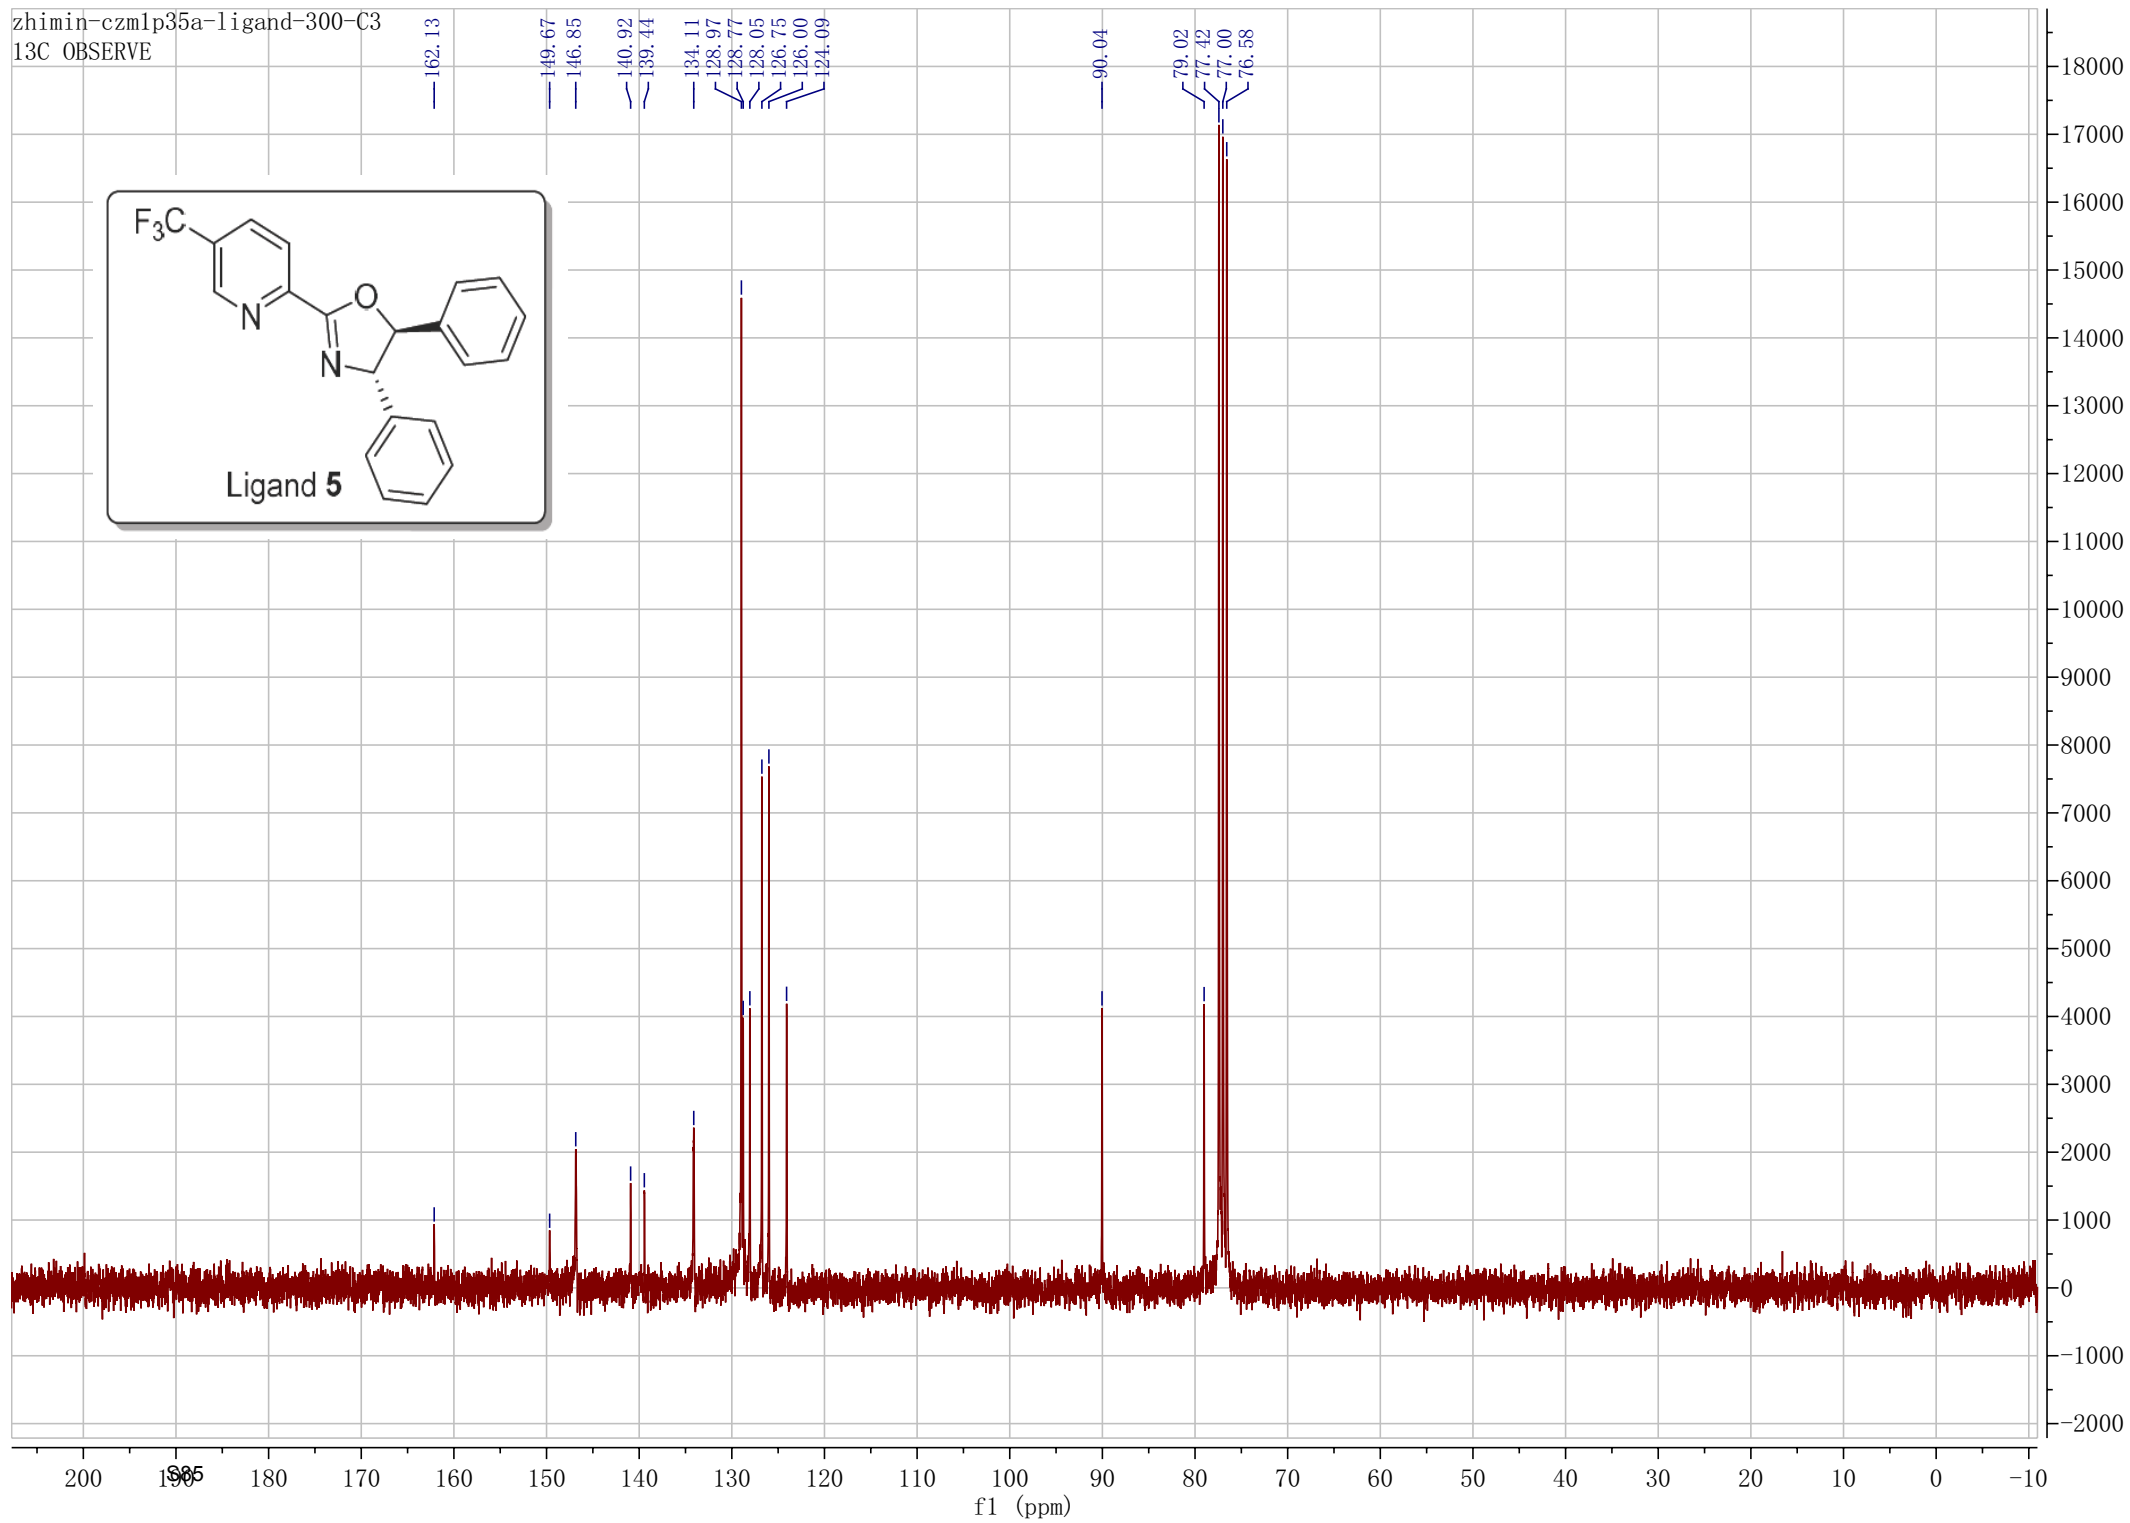

zhimin-czm1p35a-ligand-300-F1

19F OBSERVE

STANDARD PARAMETERS

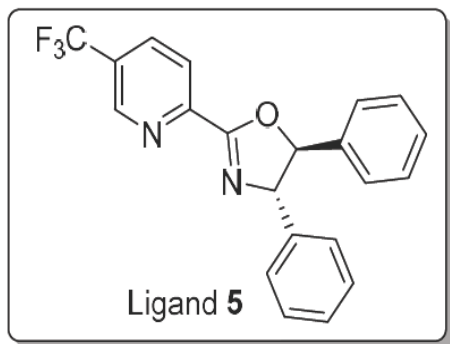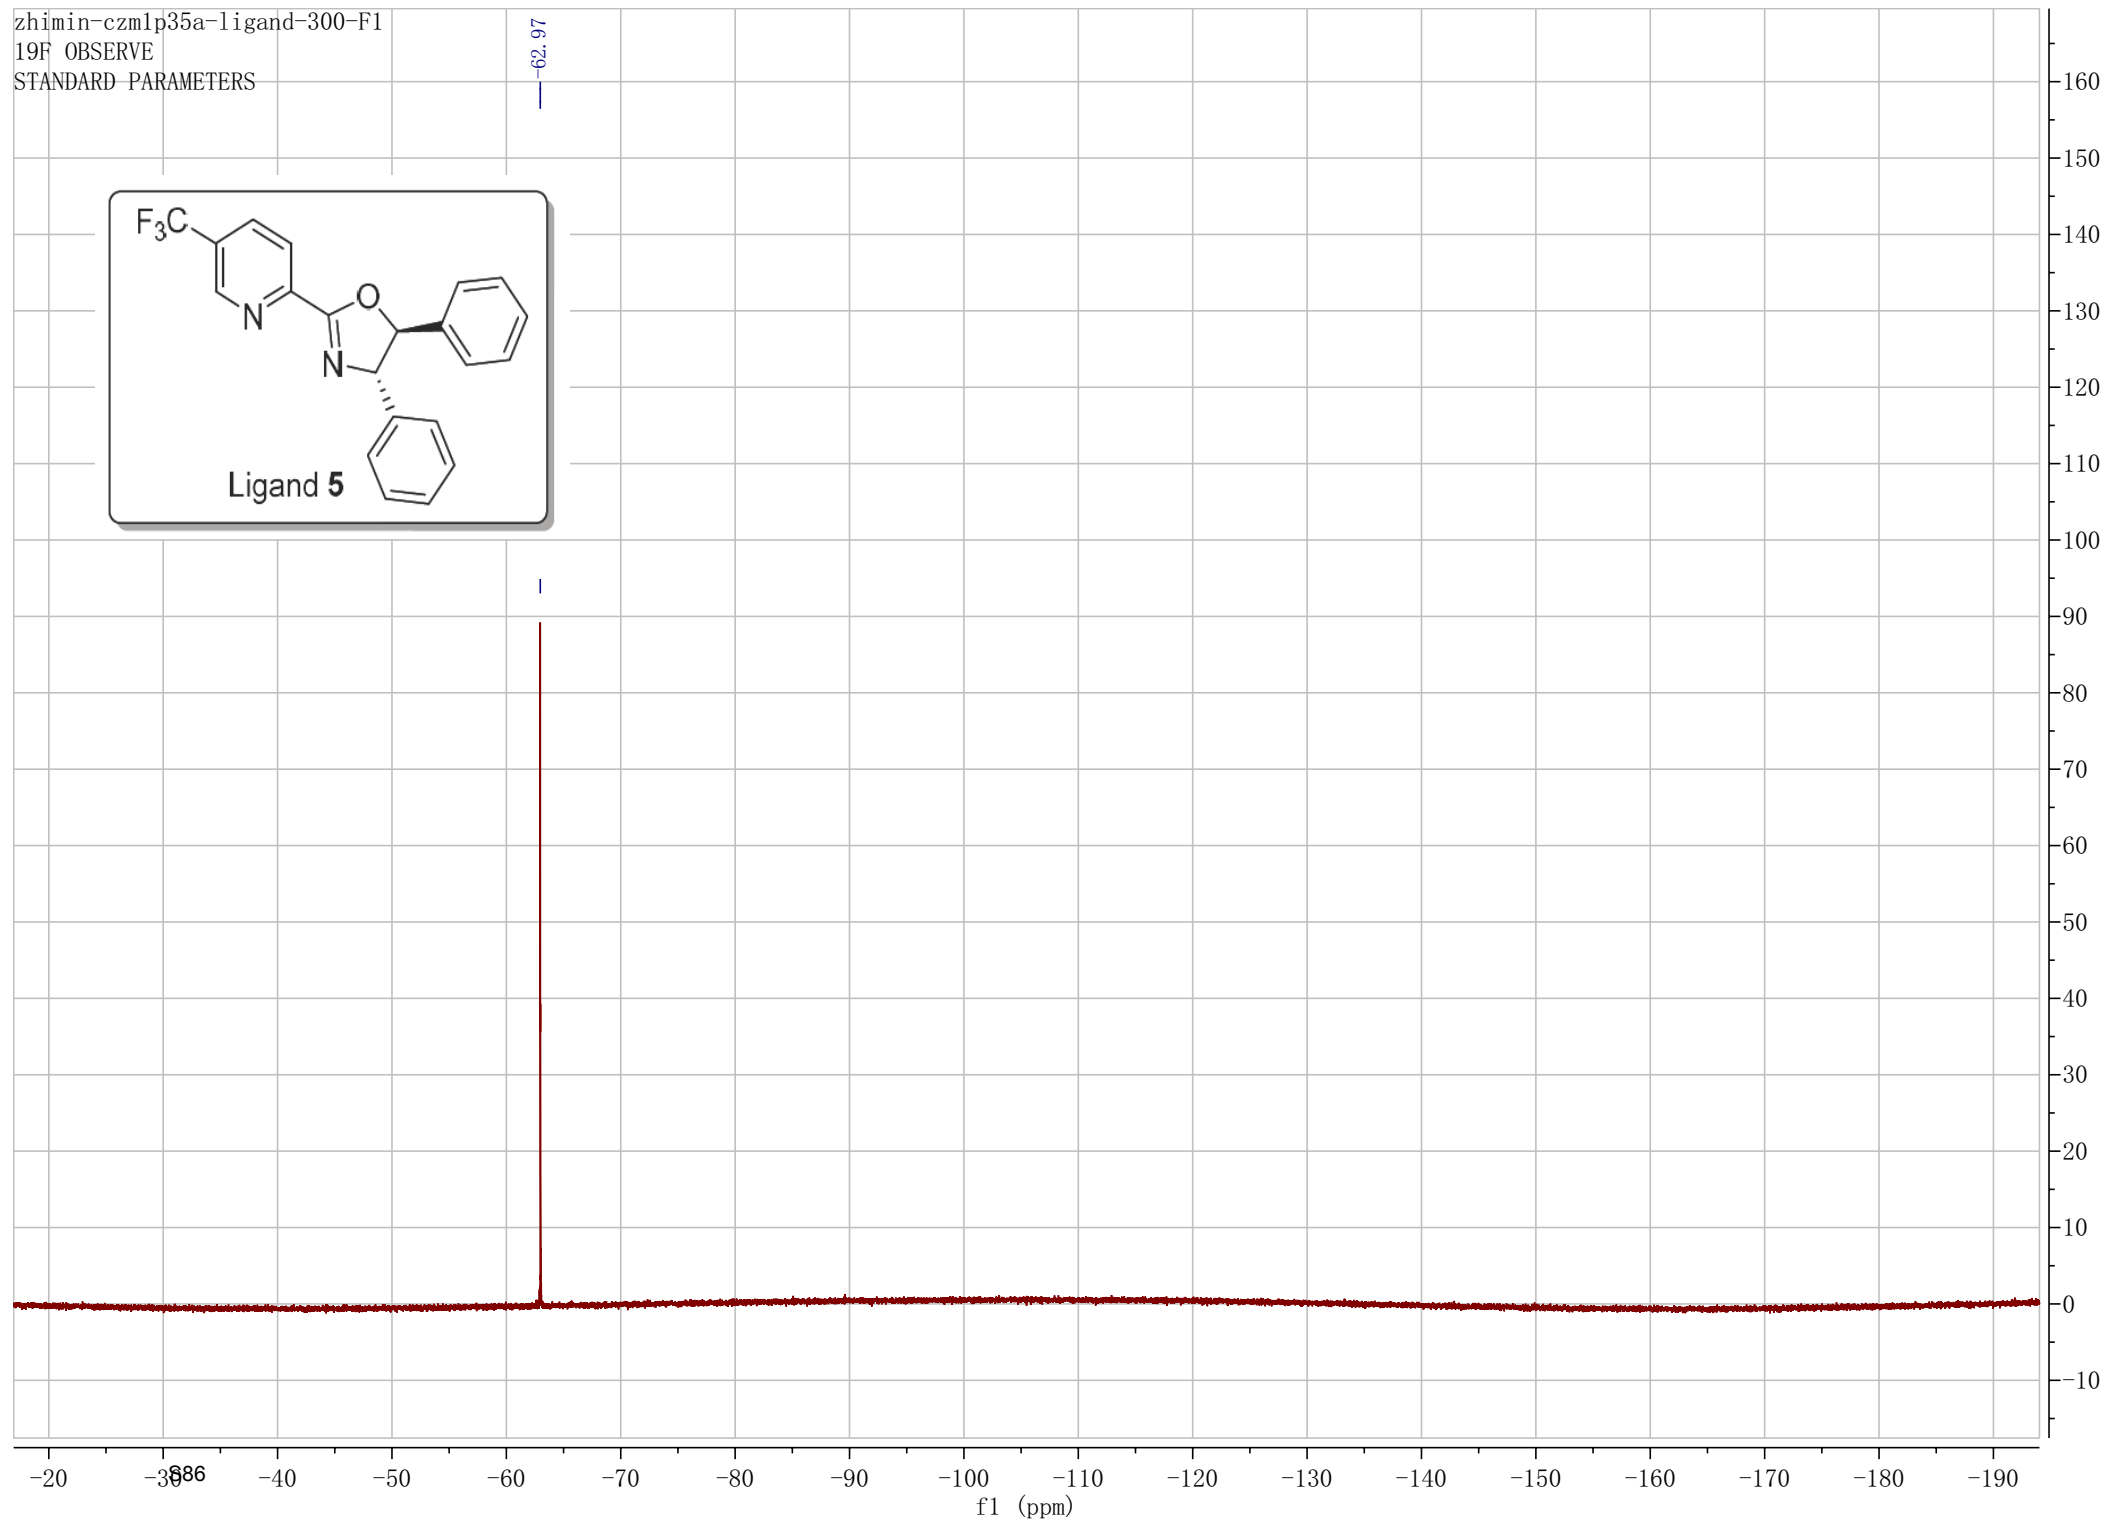

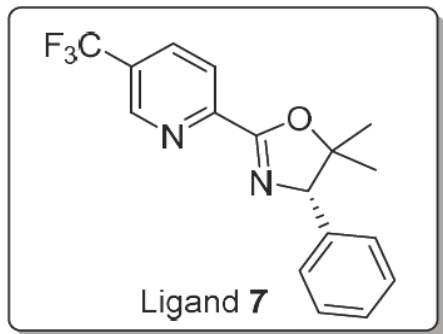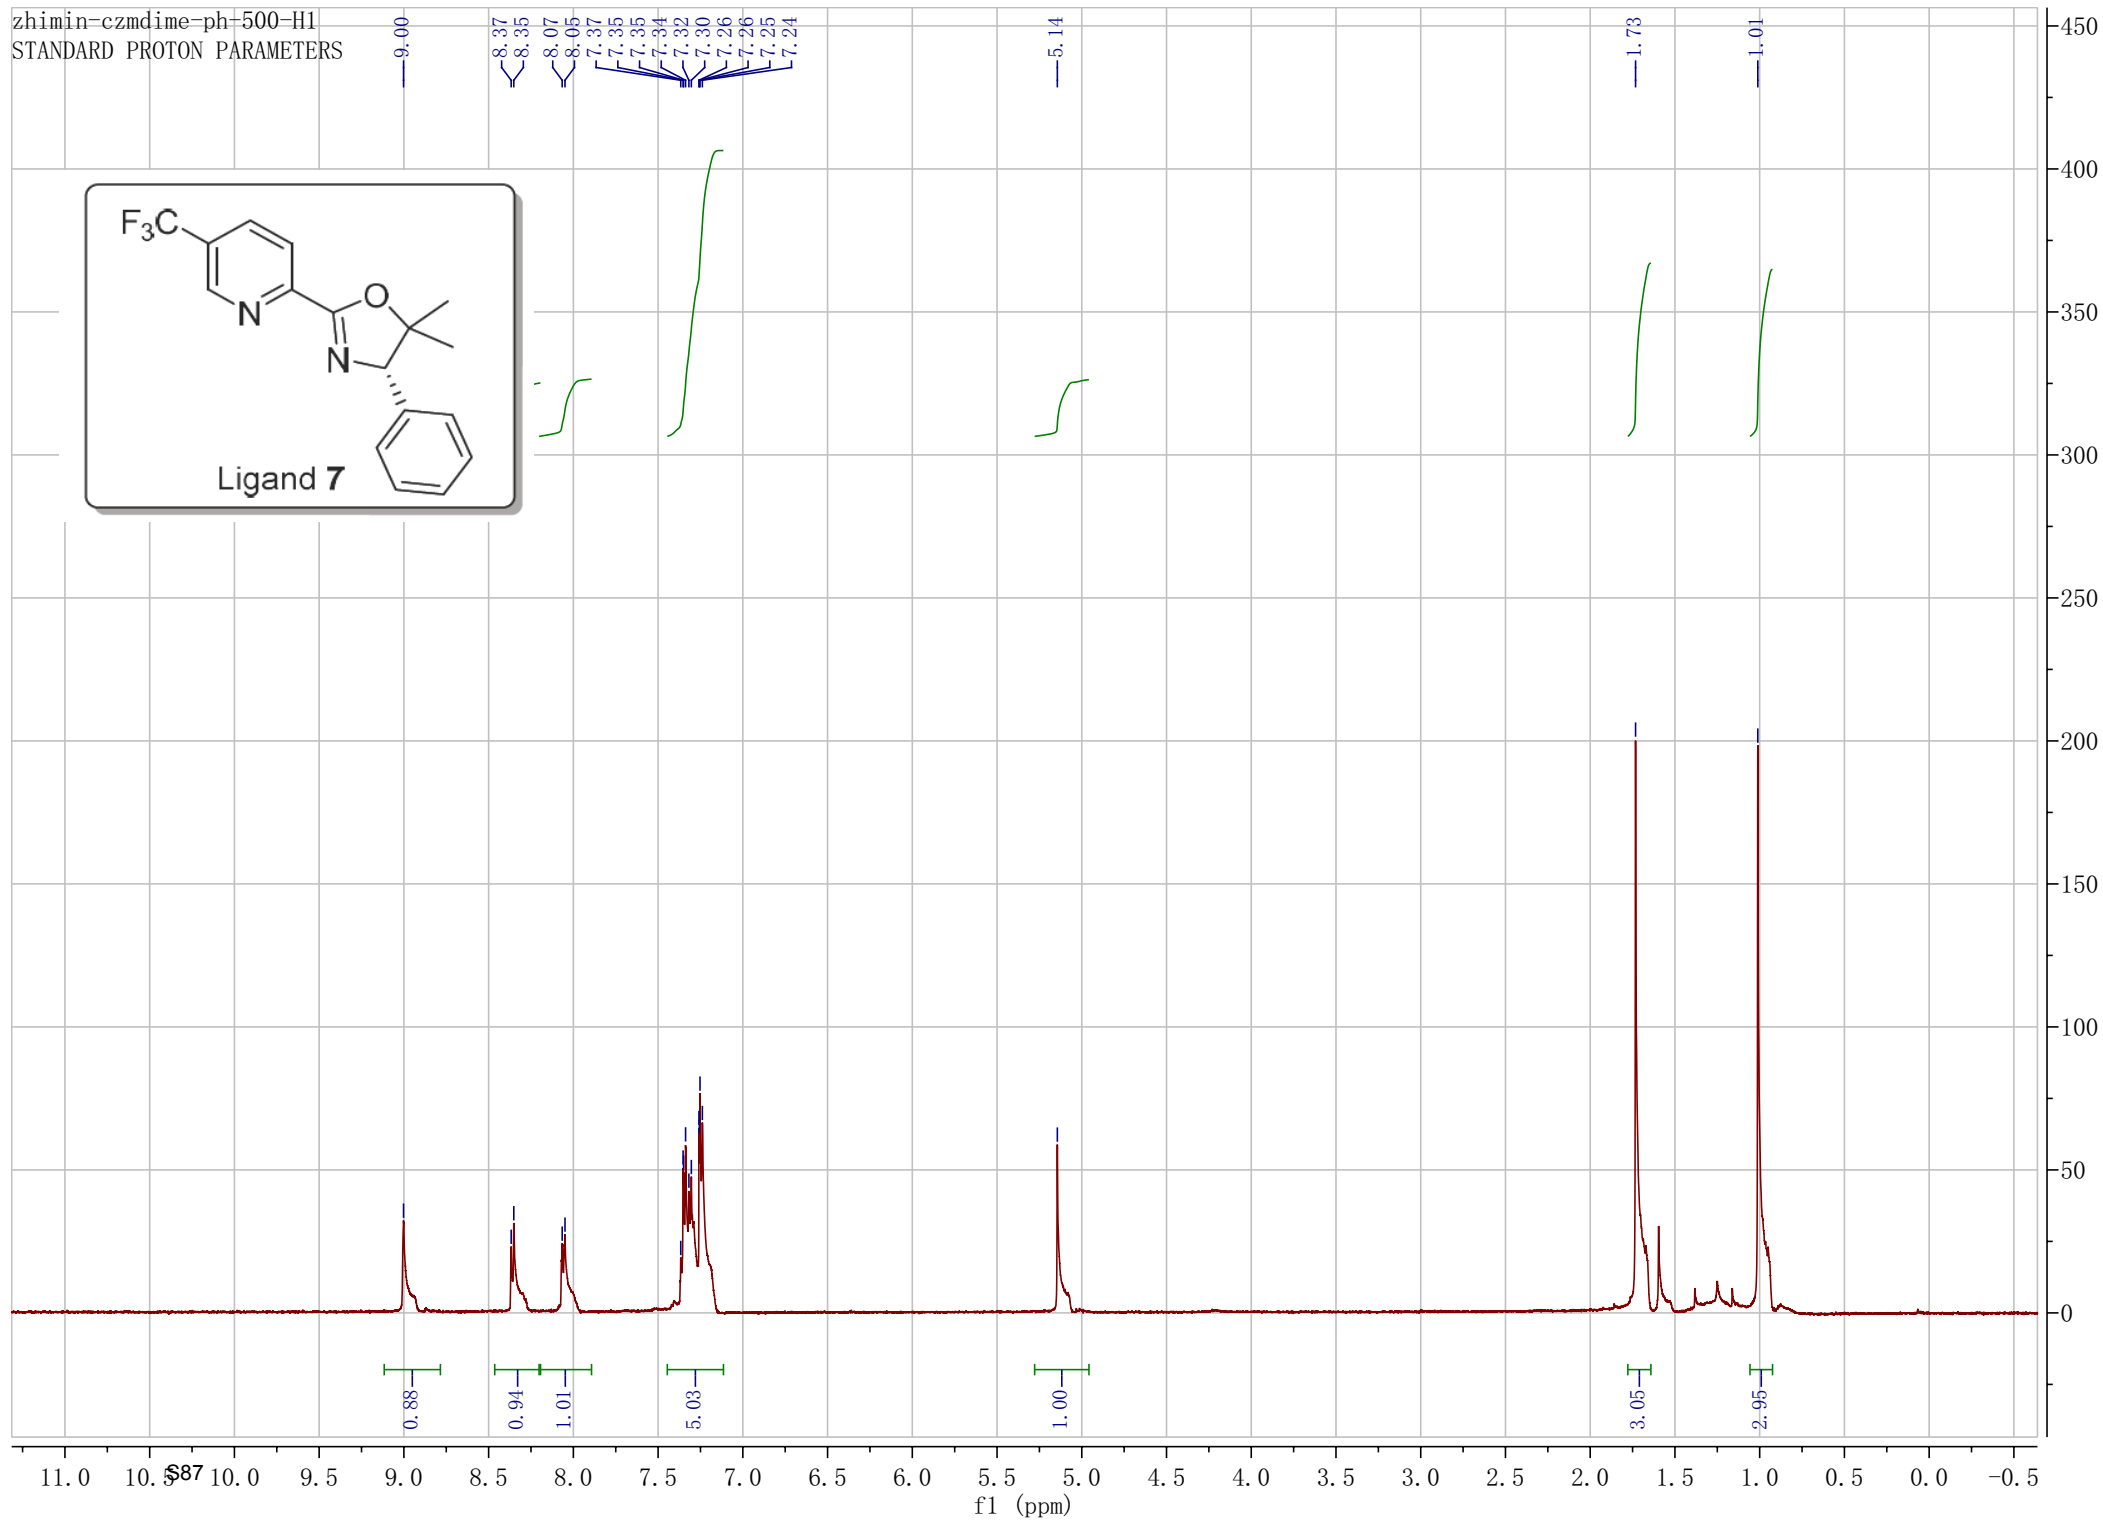

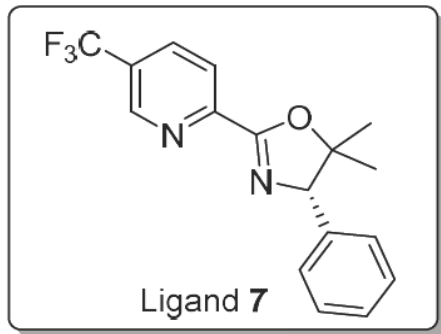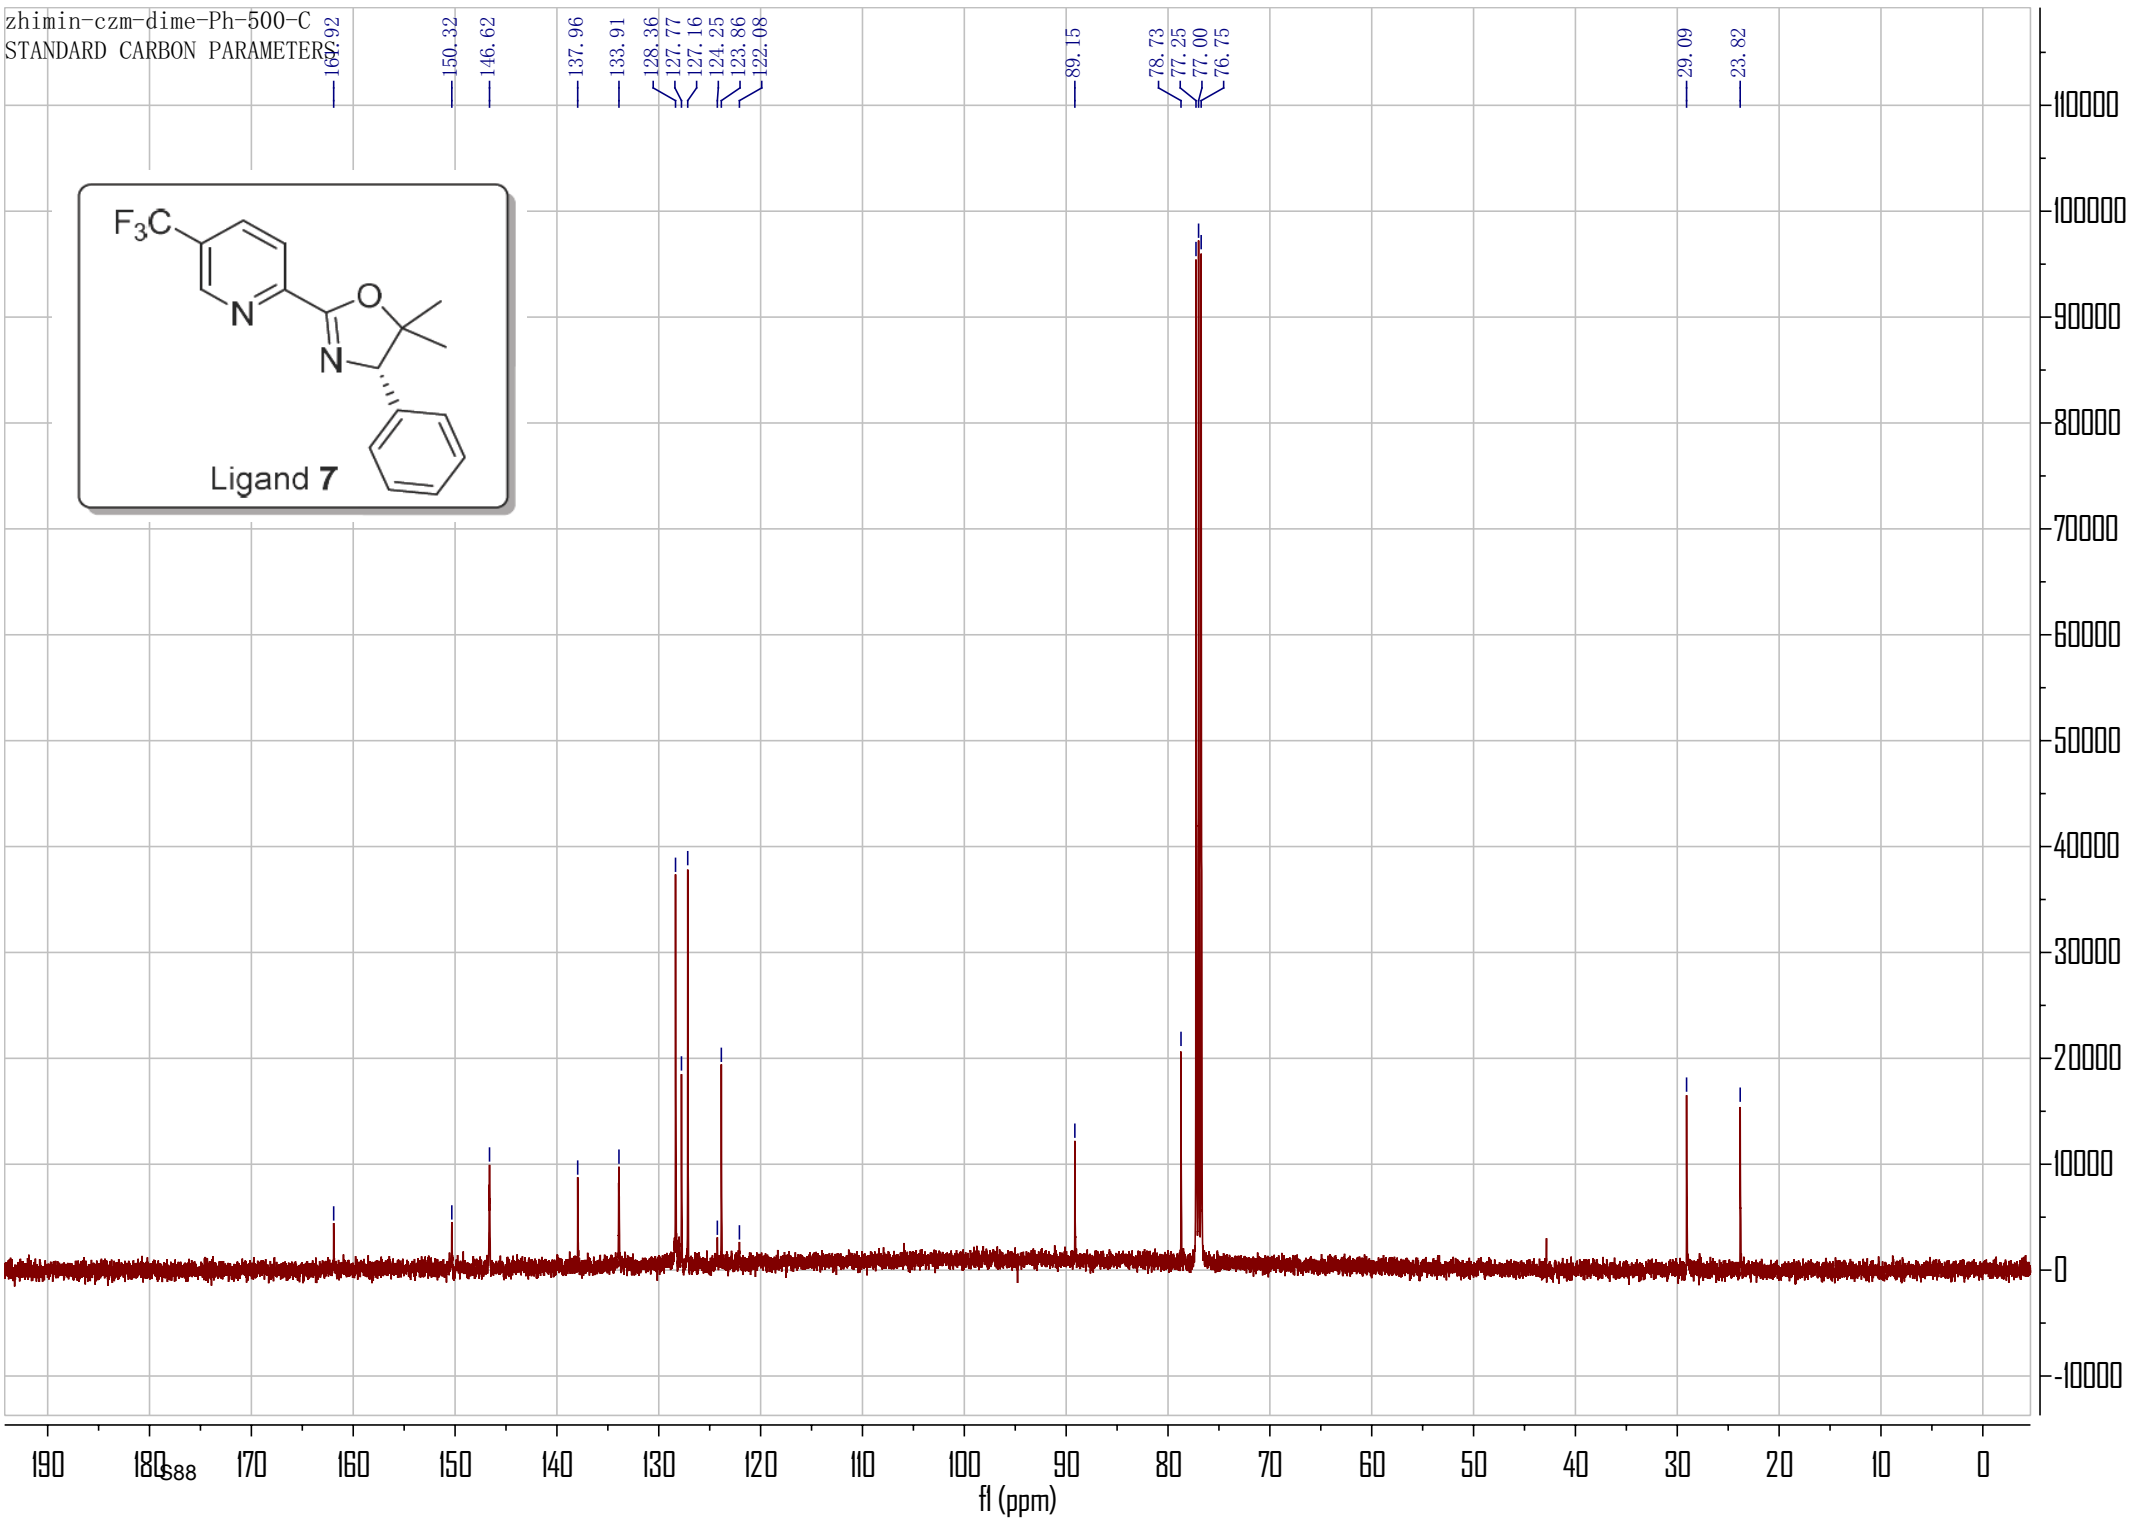

zhimin-czmligand-dime-ph-300-F  
19F OBSERVE  
STANDARD PARAMETERS

62.96  
62.98

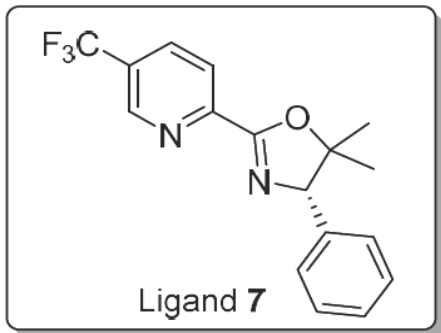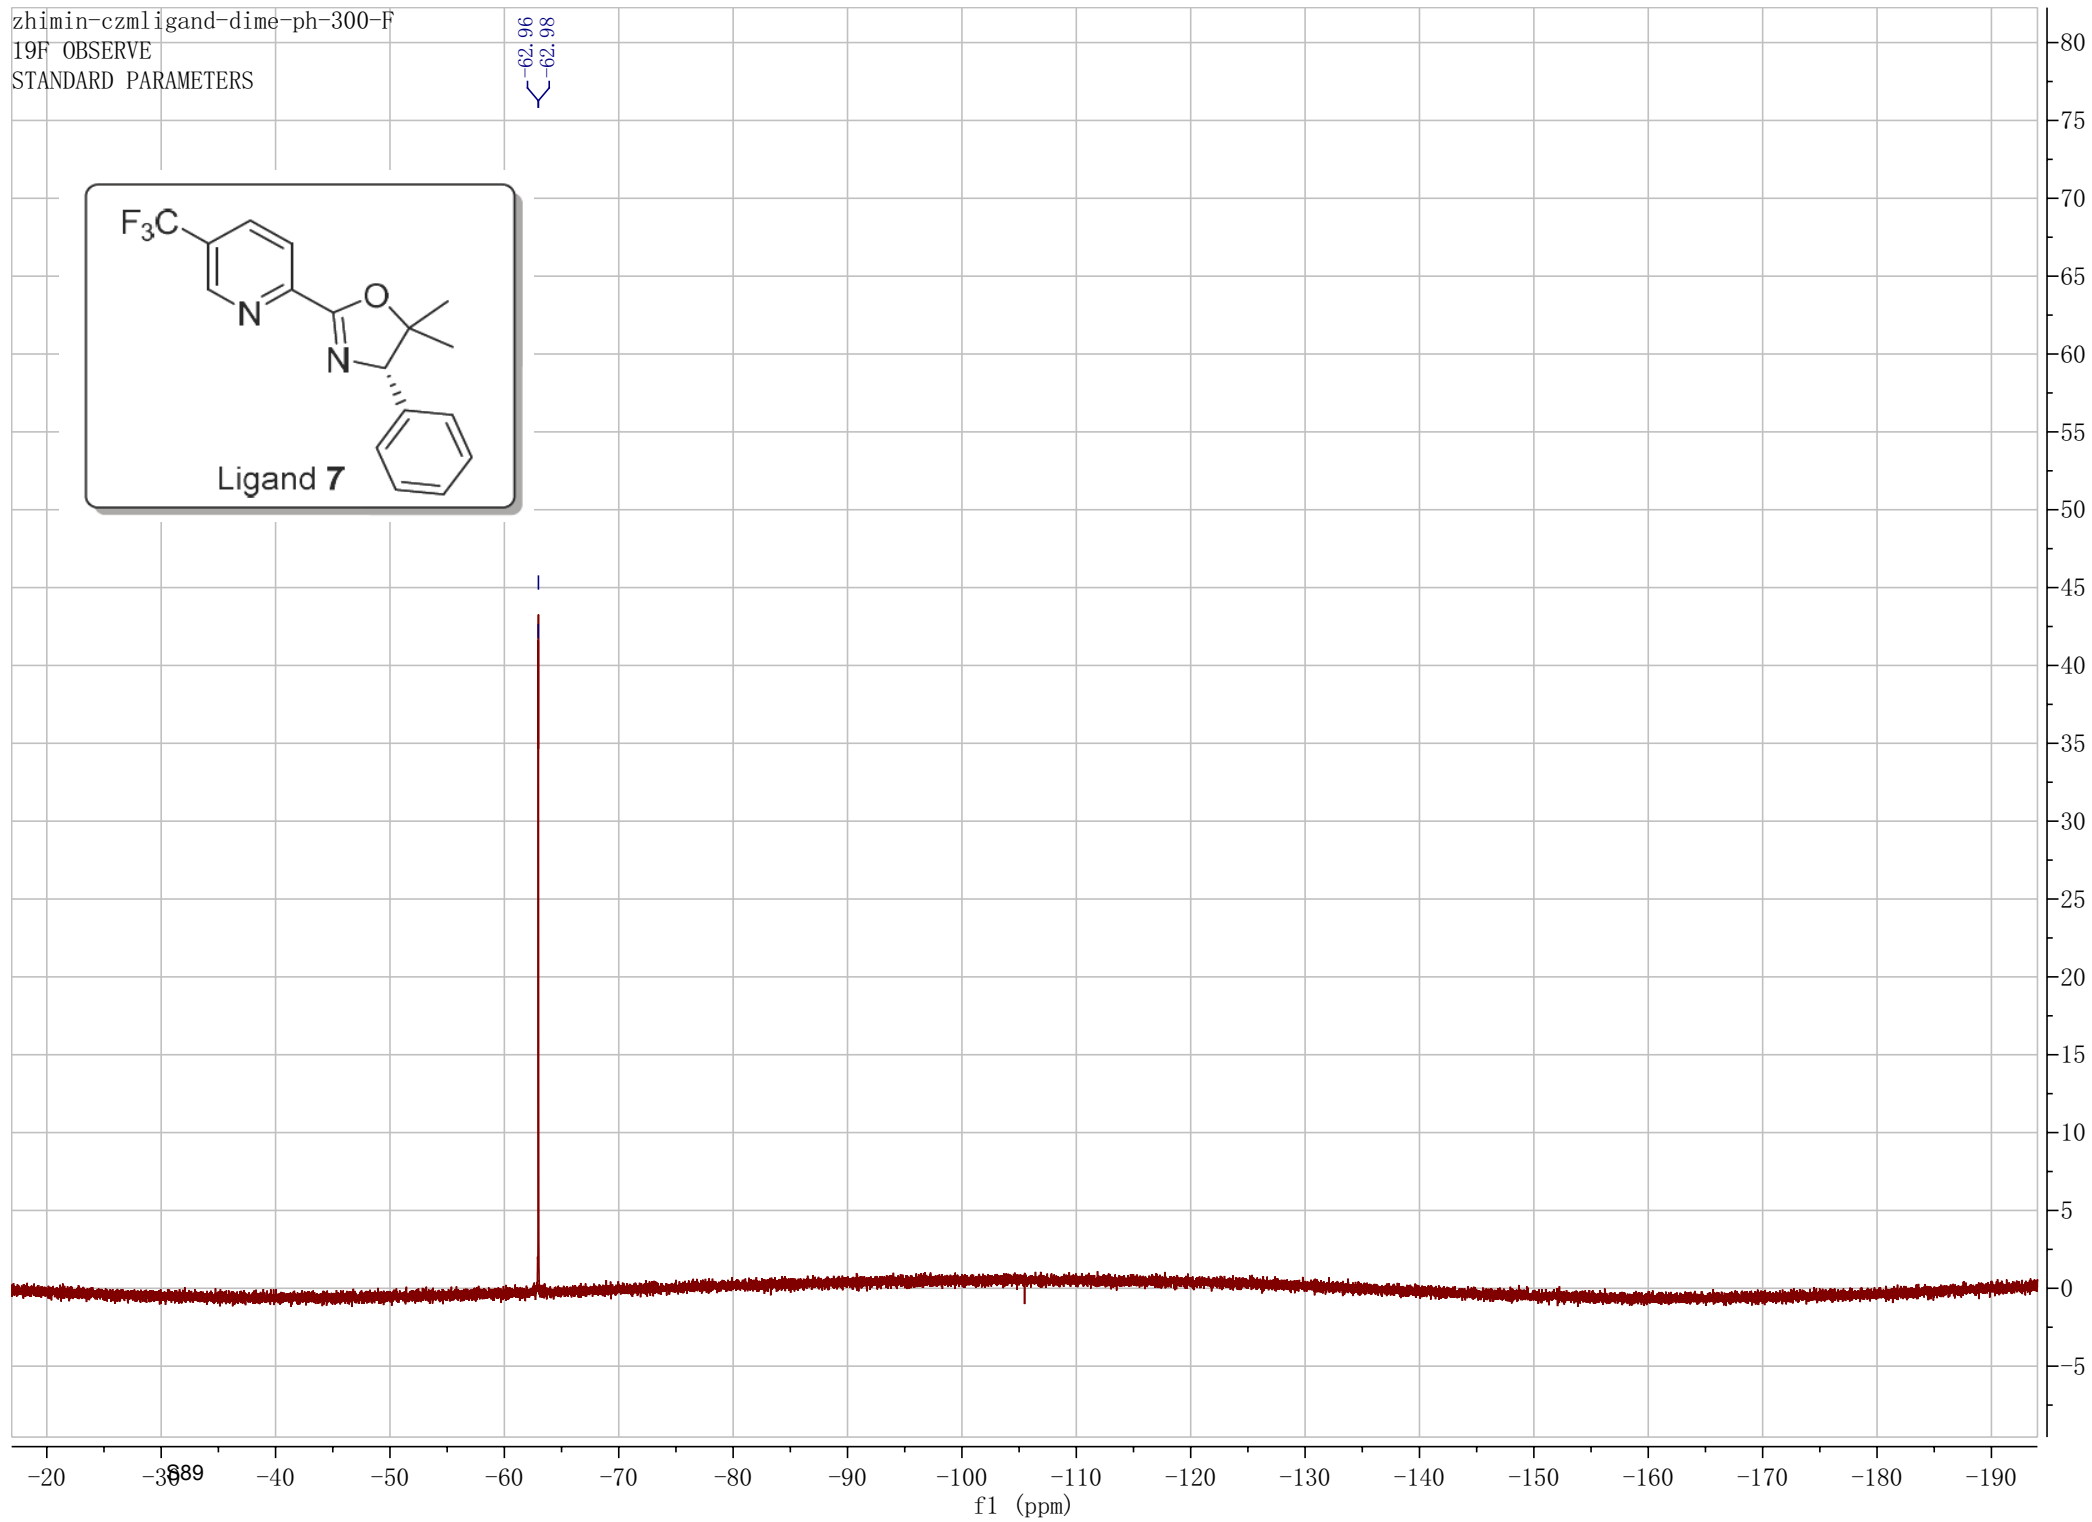

zhimin-czm313-CH<sub>2</sub>-H  
STANDARD PROTON PARAMETERS

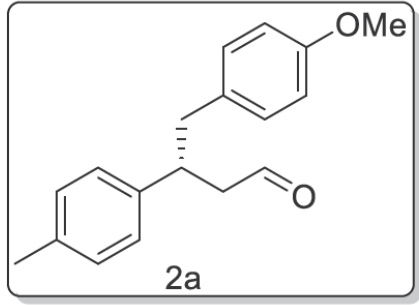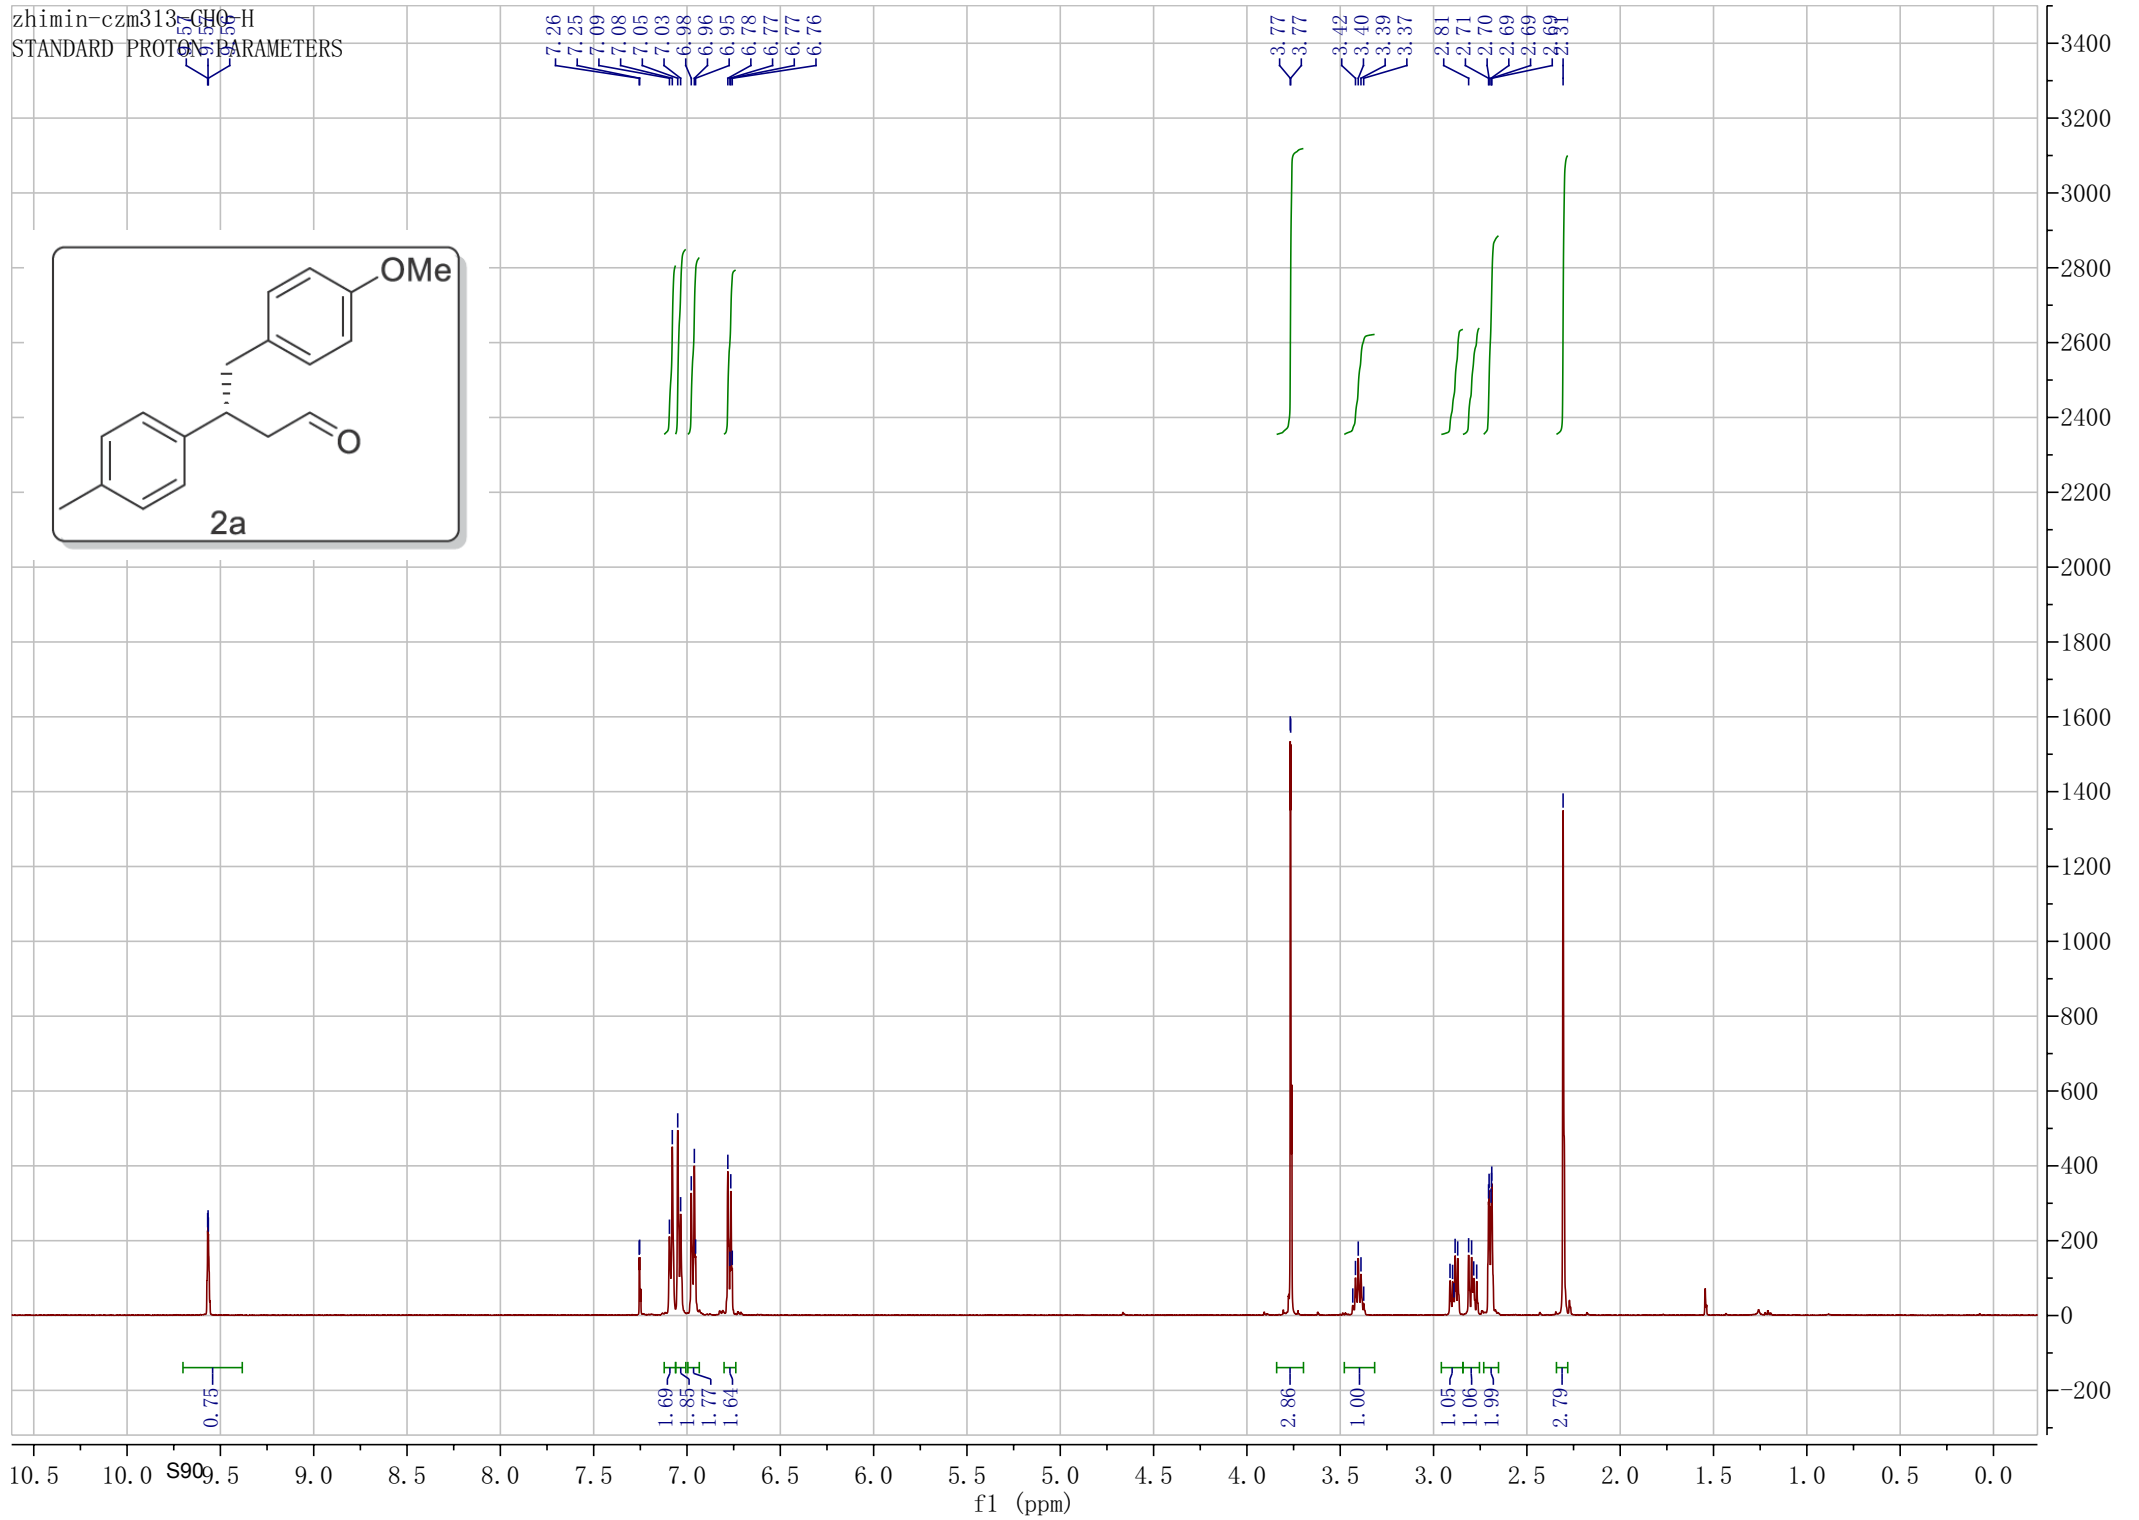



zhimin-2023-02-28  
STANDARD: CARBON PARAMETERS

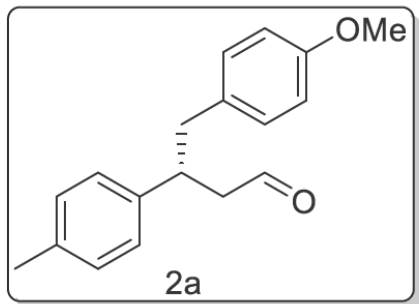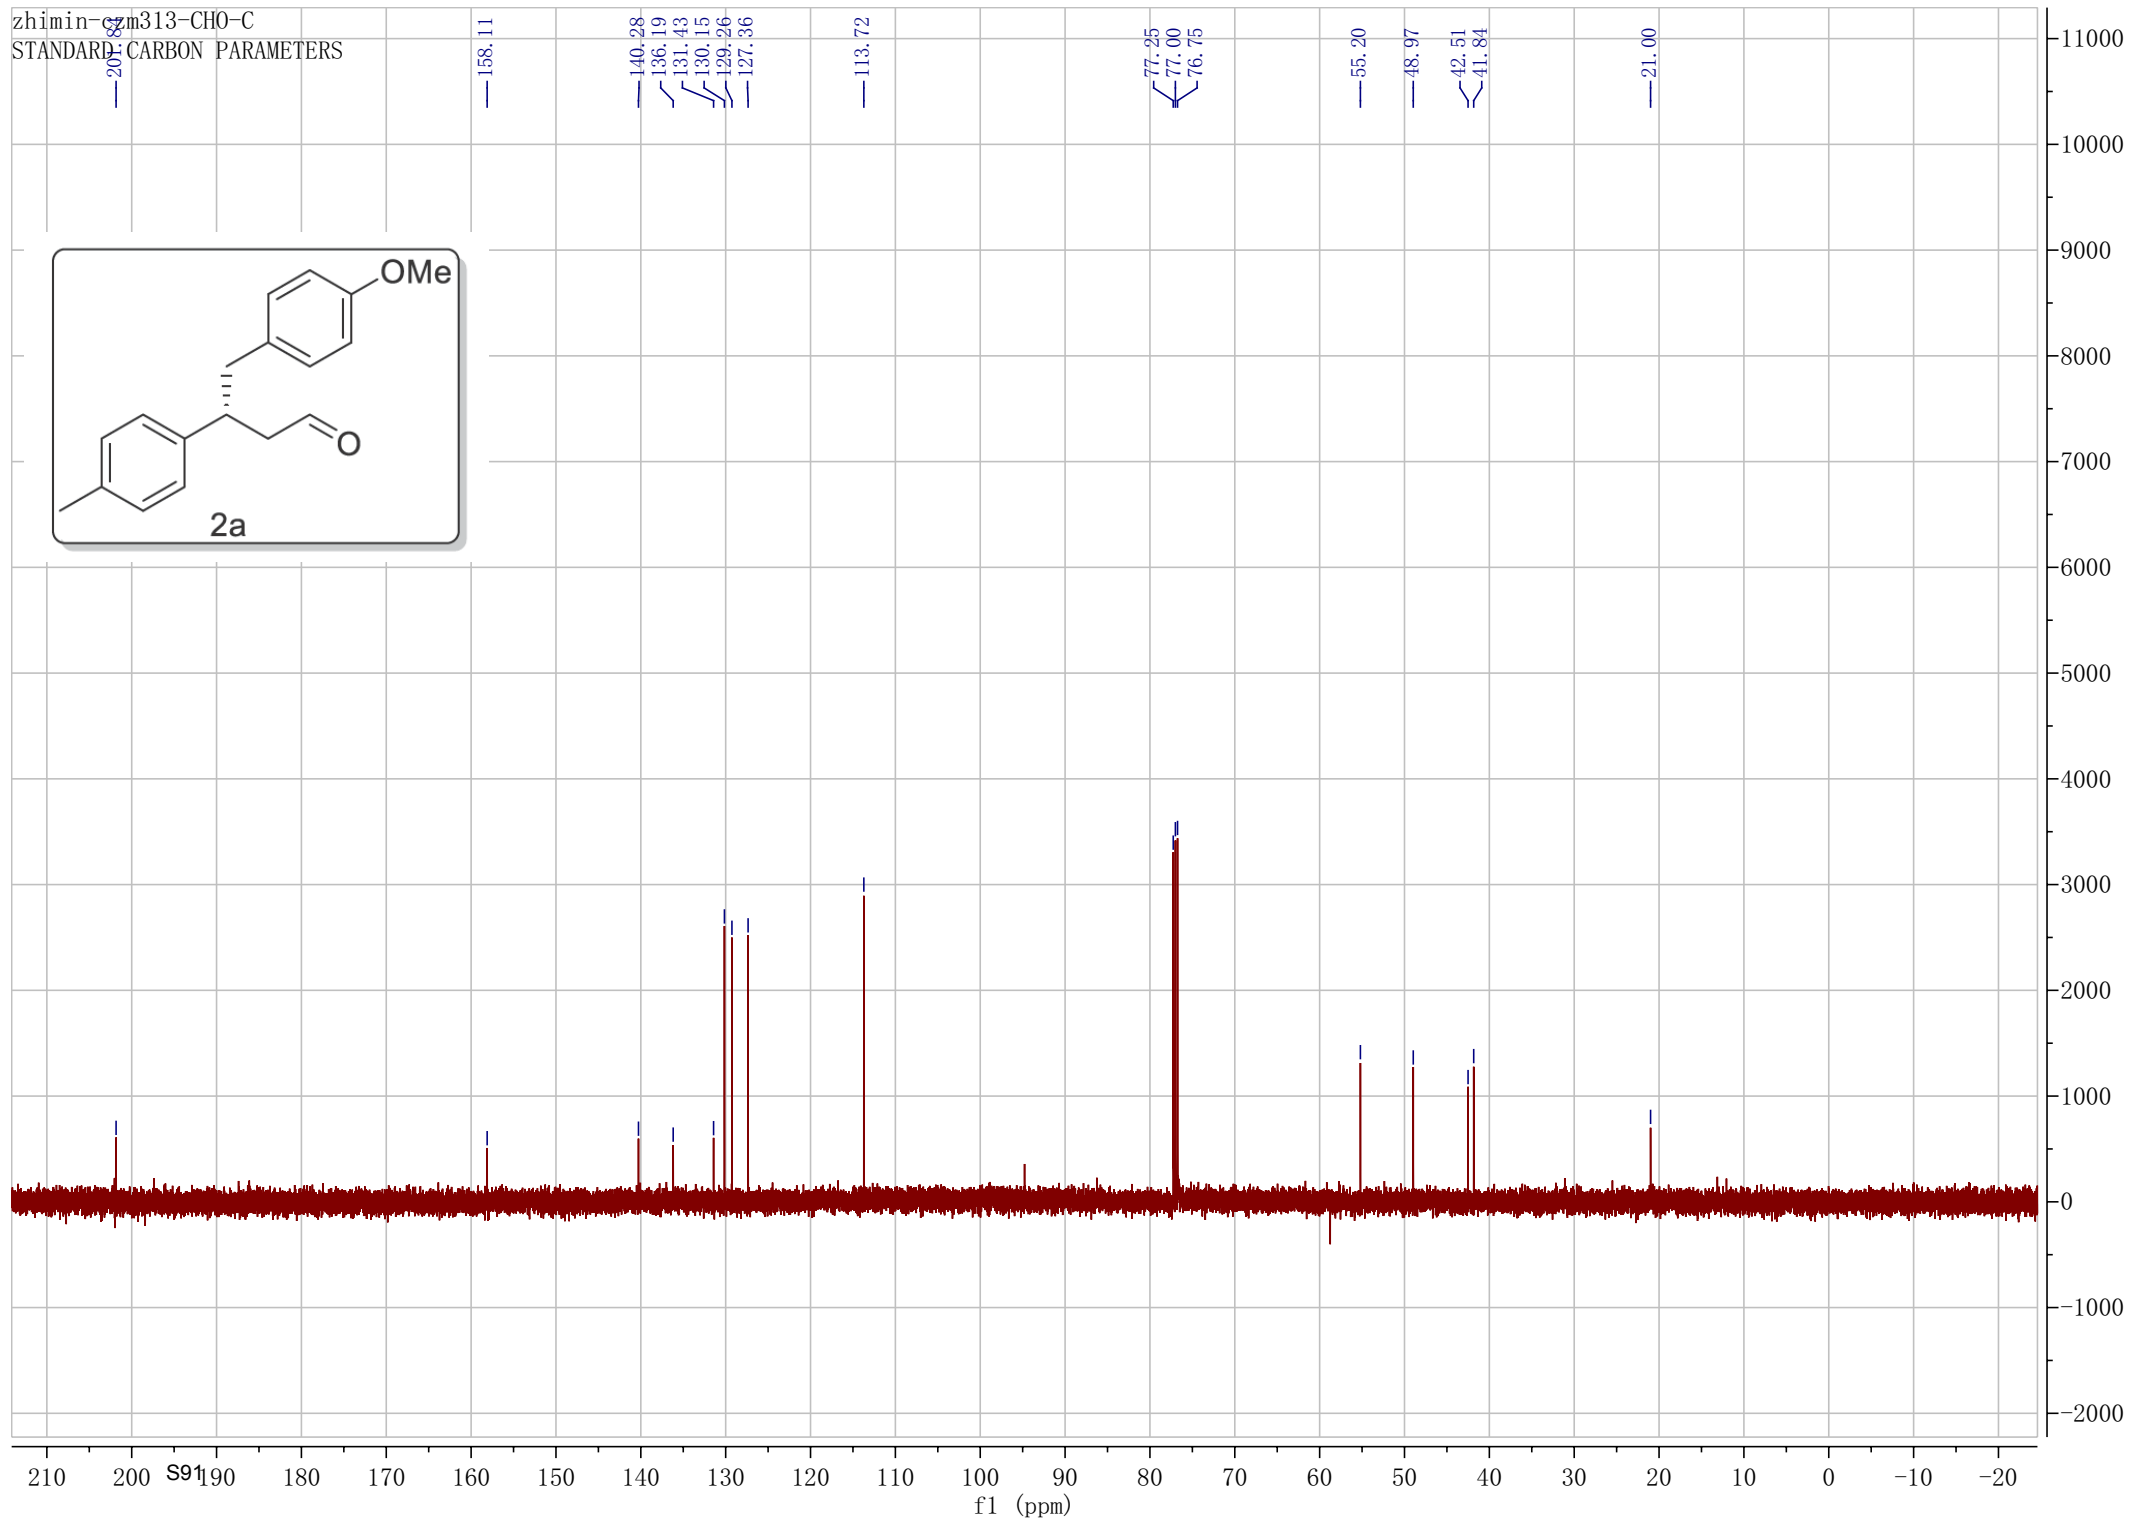

zhimin-czm313-OH-300-H  
UofUtah Unity 300 NMR  
STANDARD 1H OBSERV

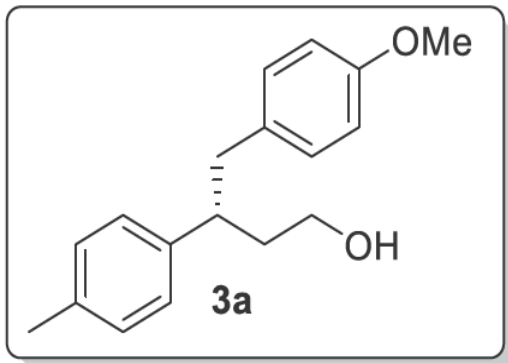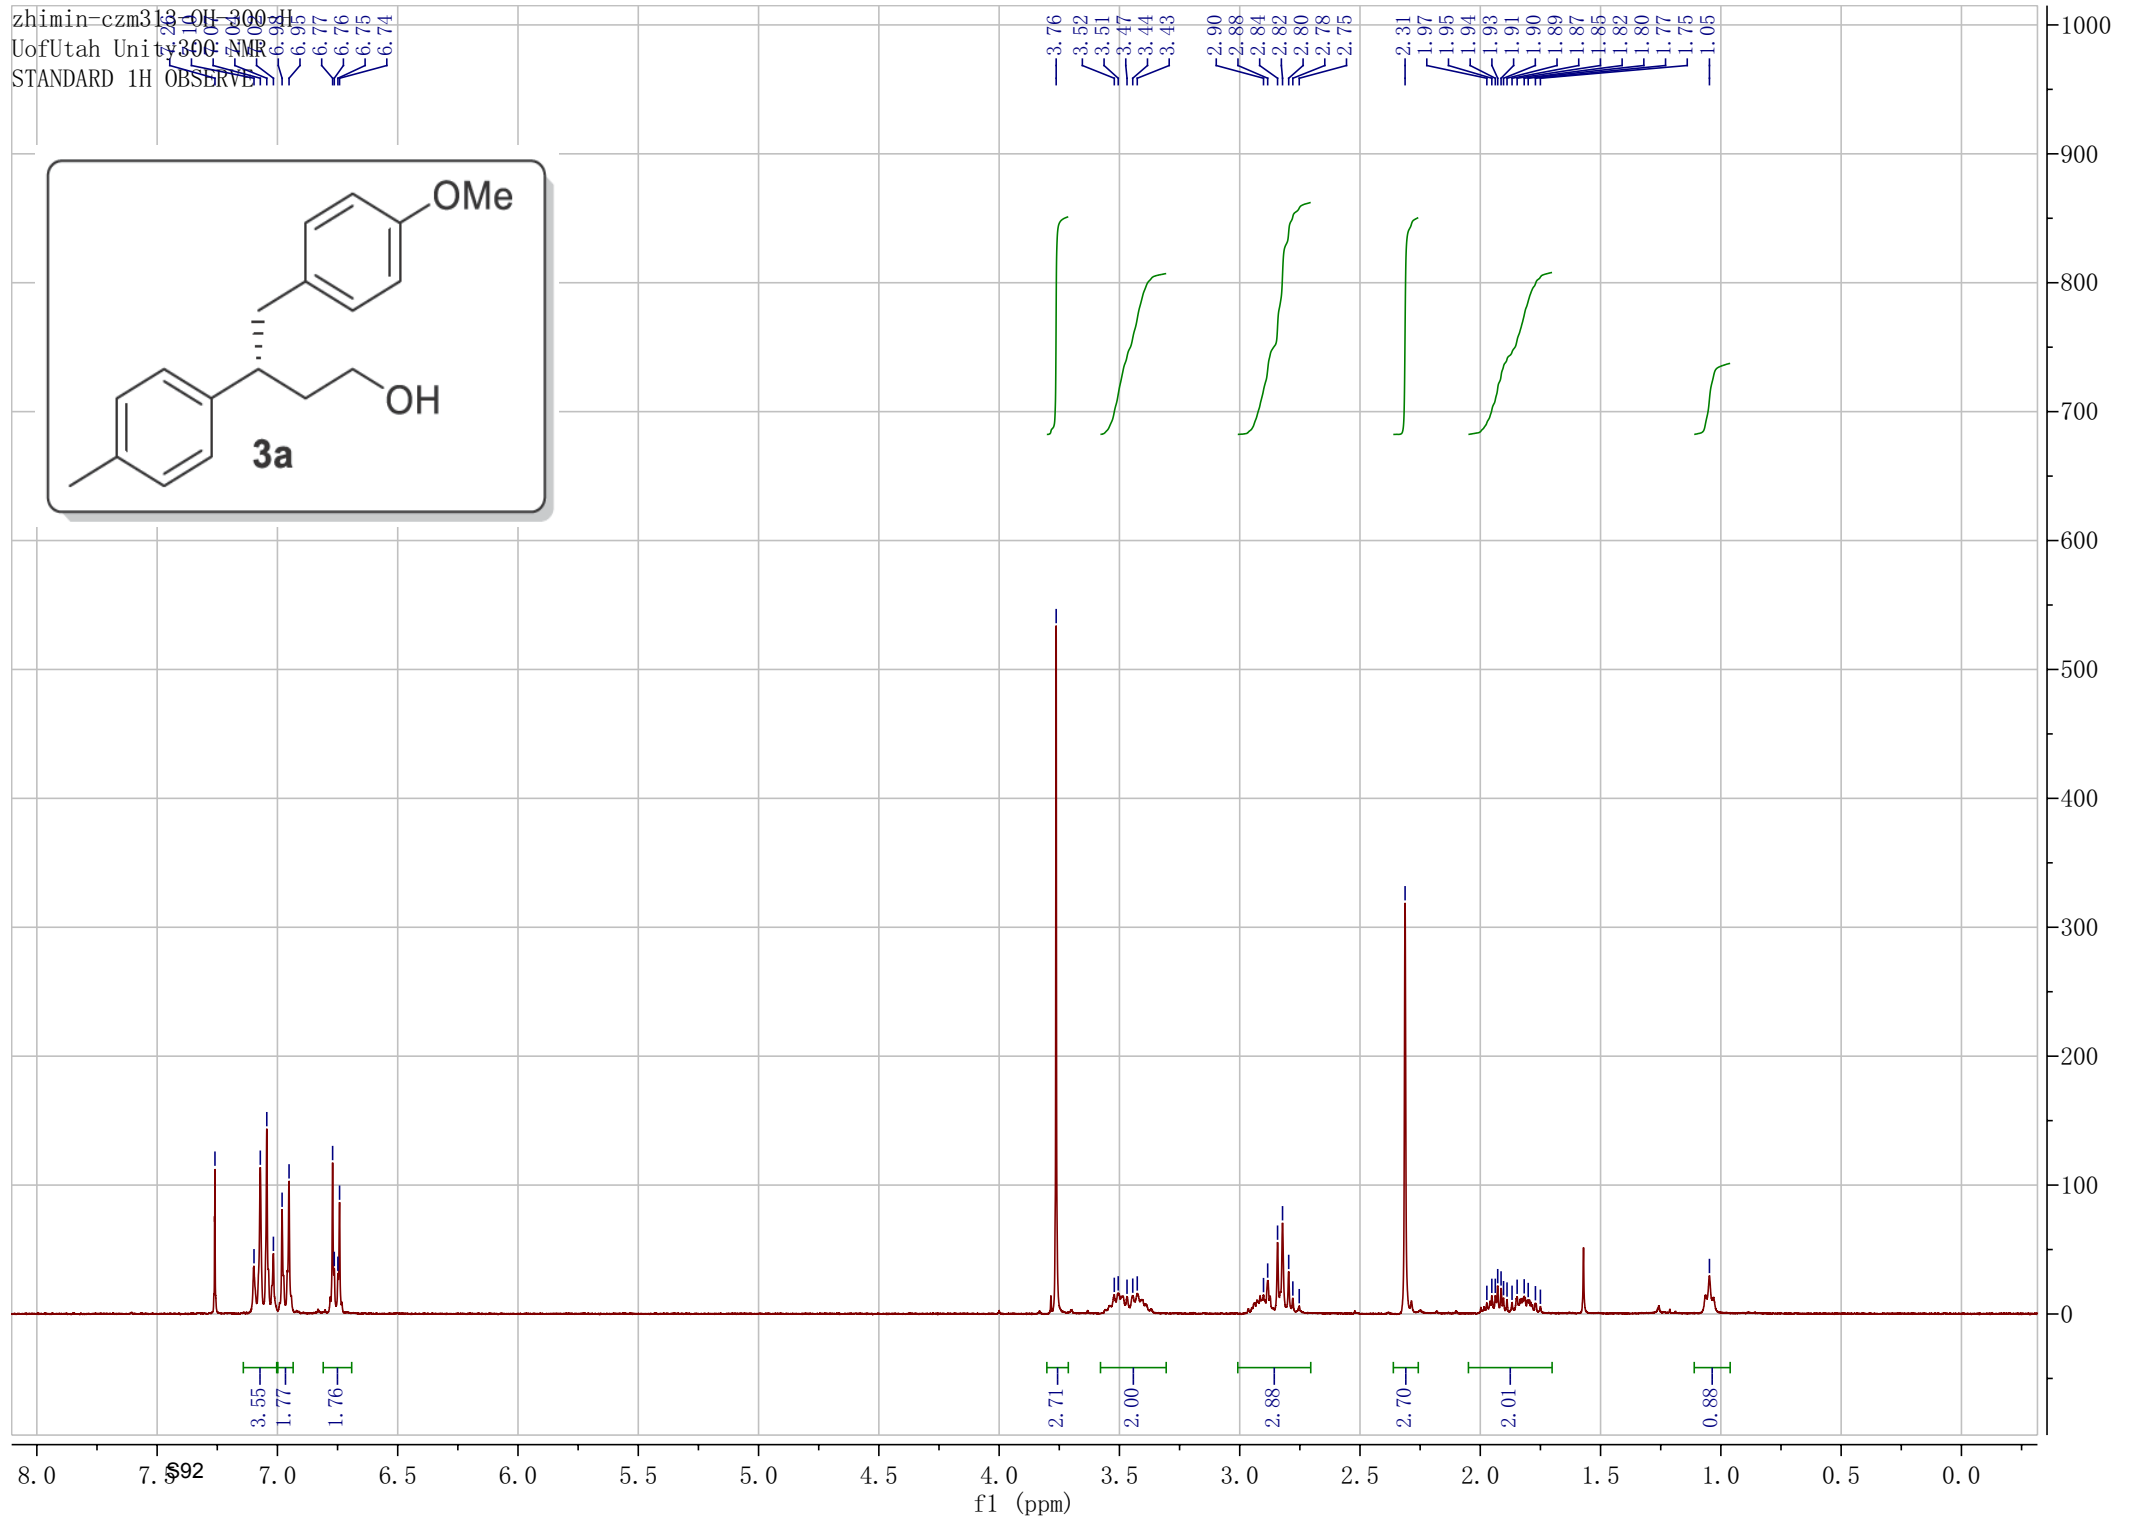

zhimin-czm313-OH-300-C  
13C-OBSERVE

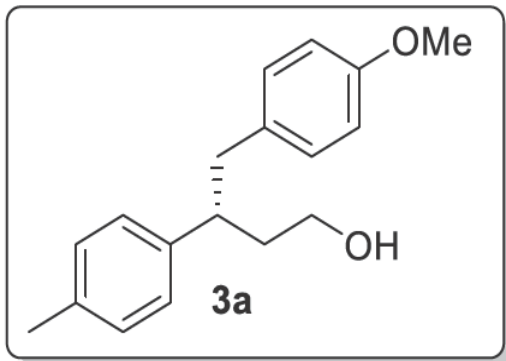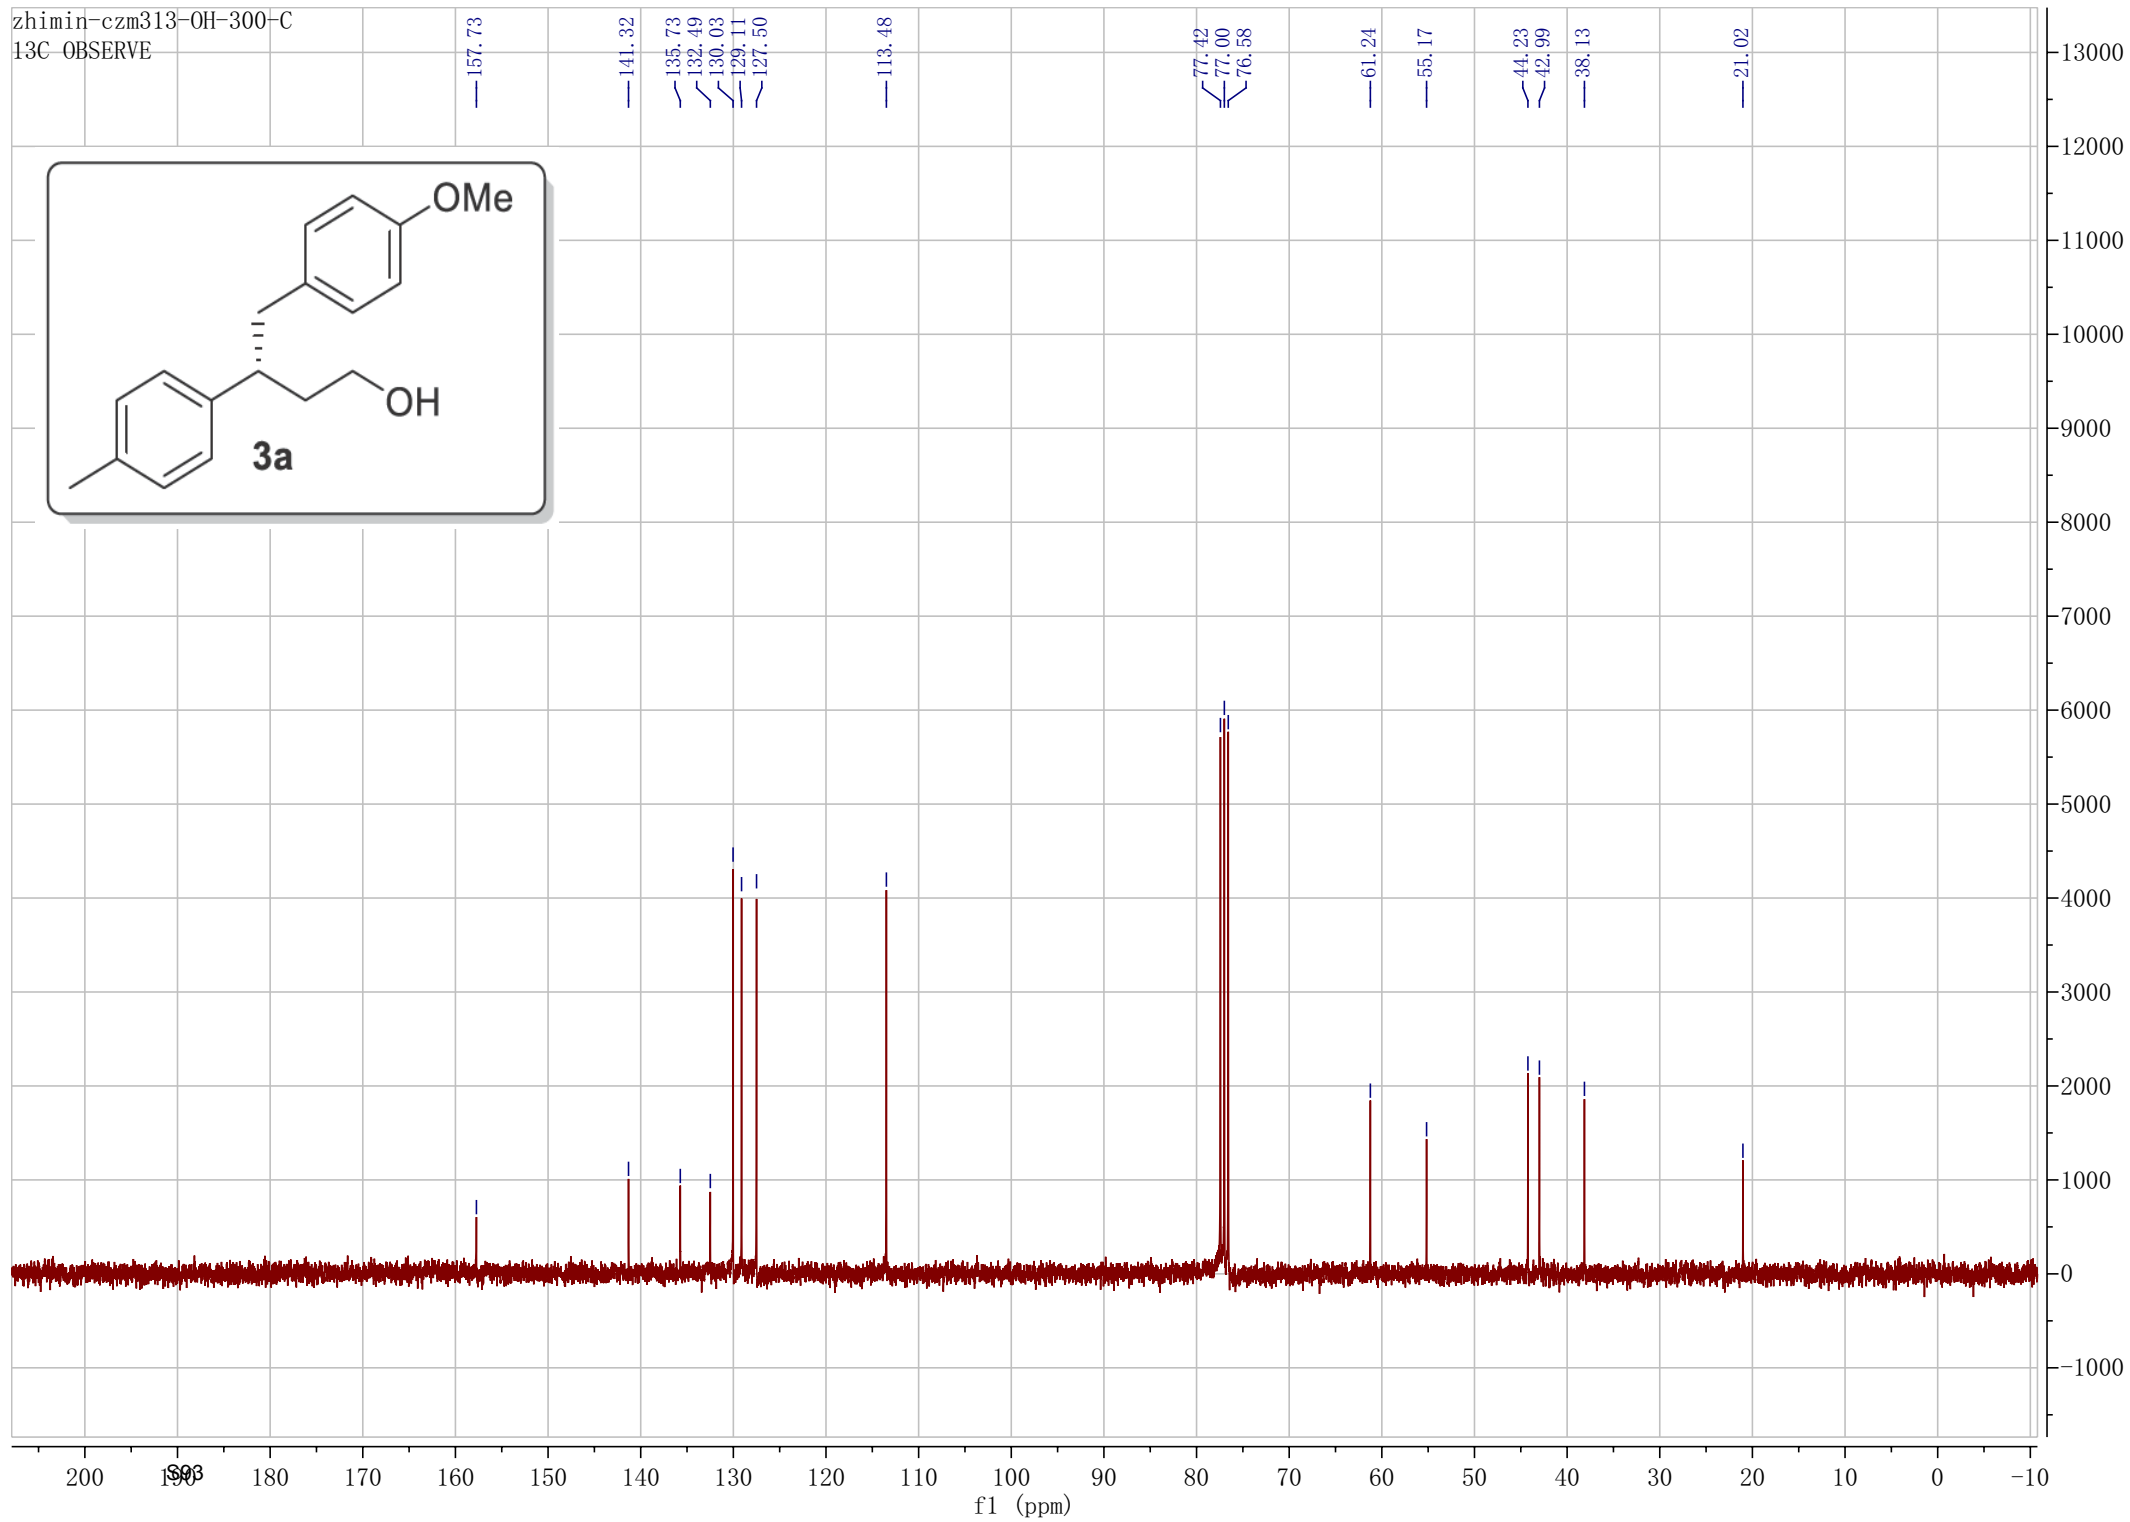

zhimin-czm317-CHO-500-H1  
STANDARD PROTON PARAMETERS

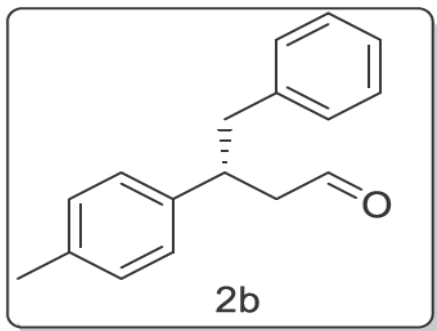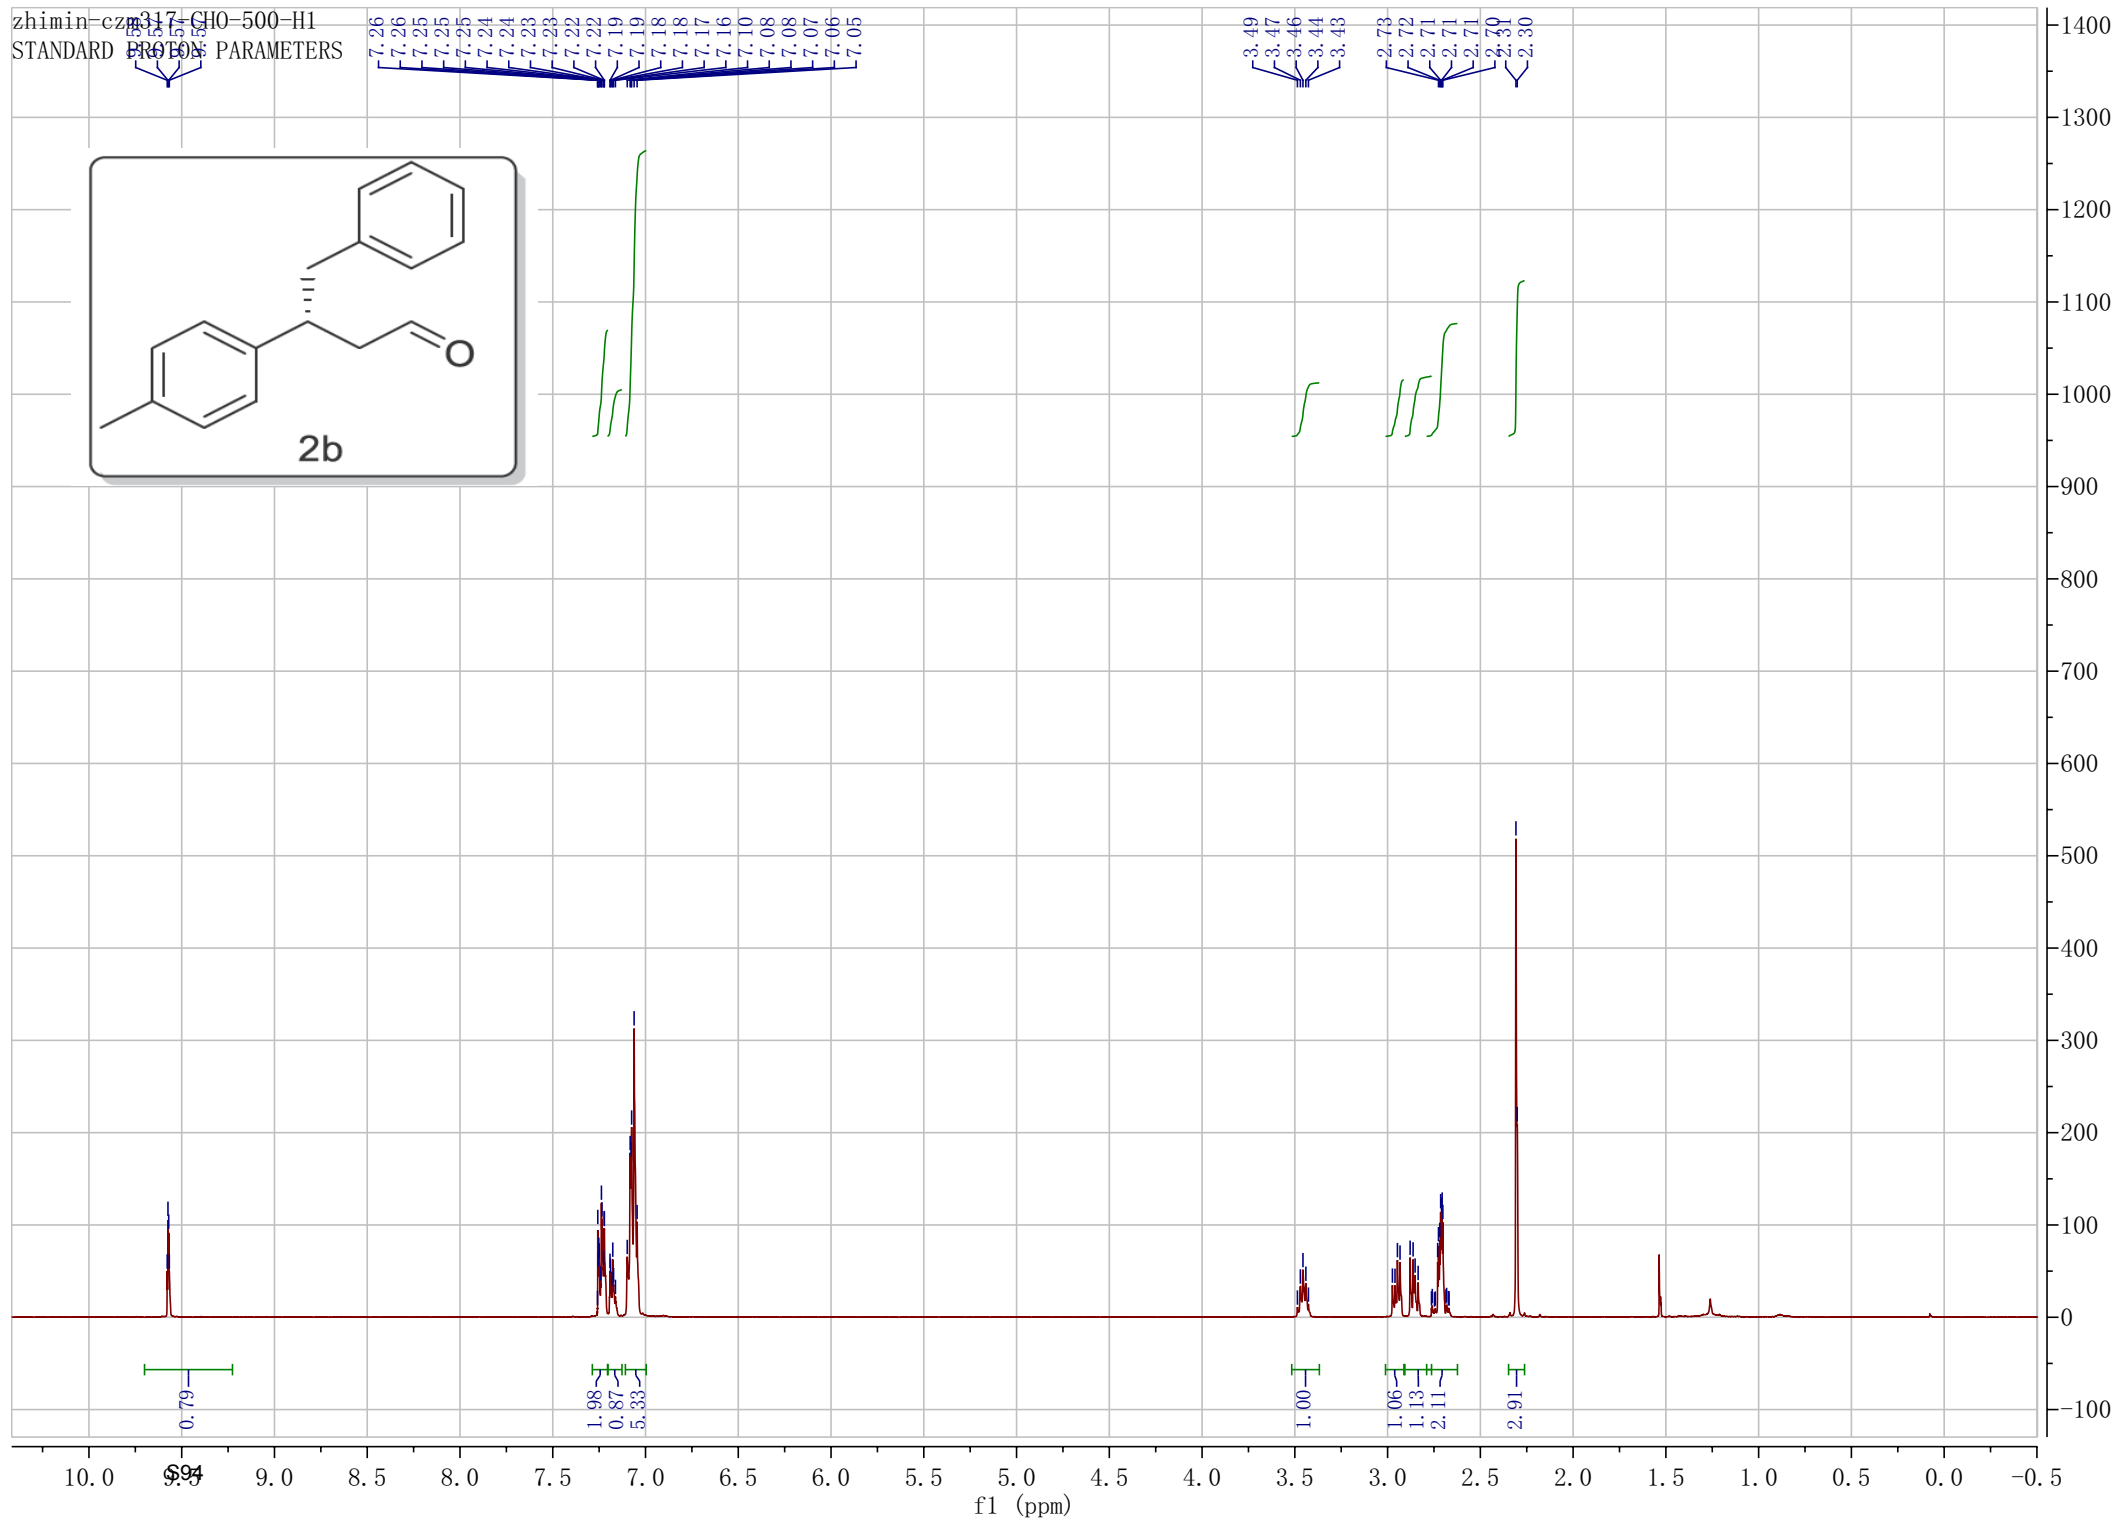

zhimin-czm317-CHO-300-C  
13C OBSERVE

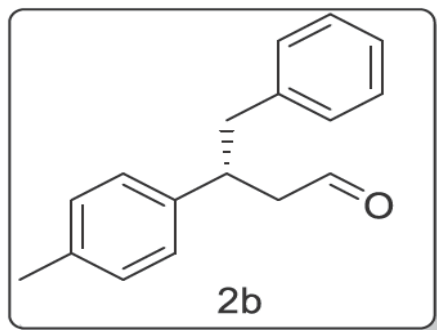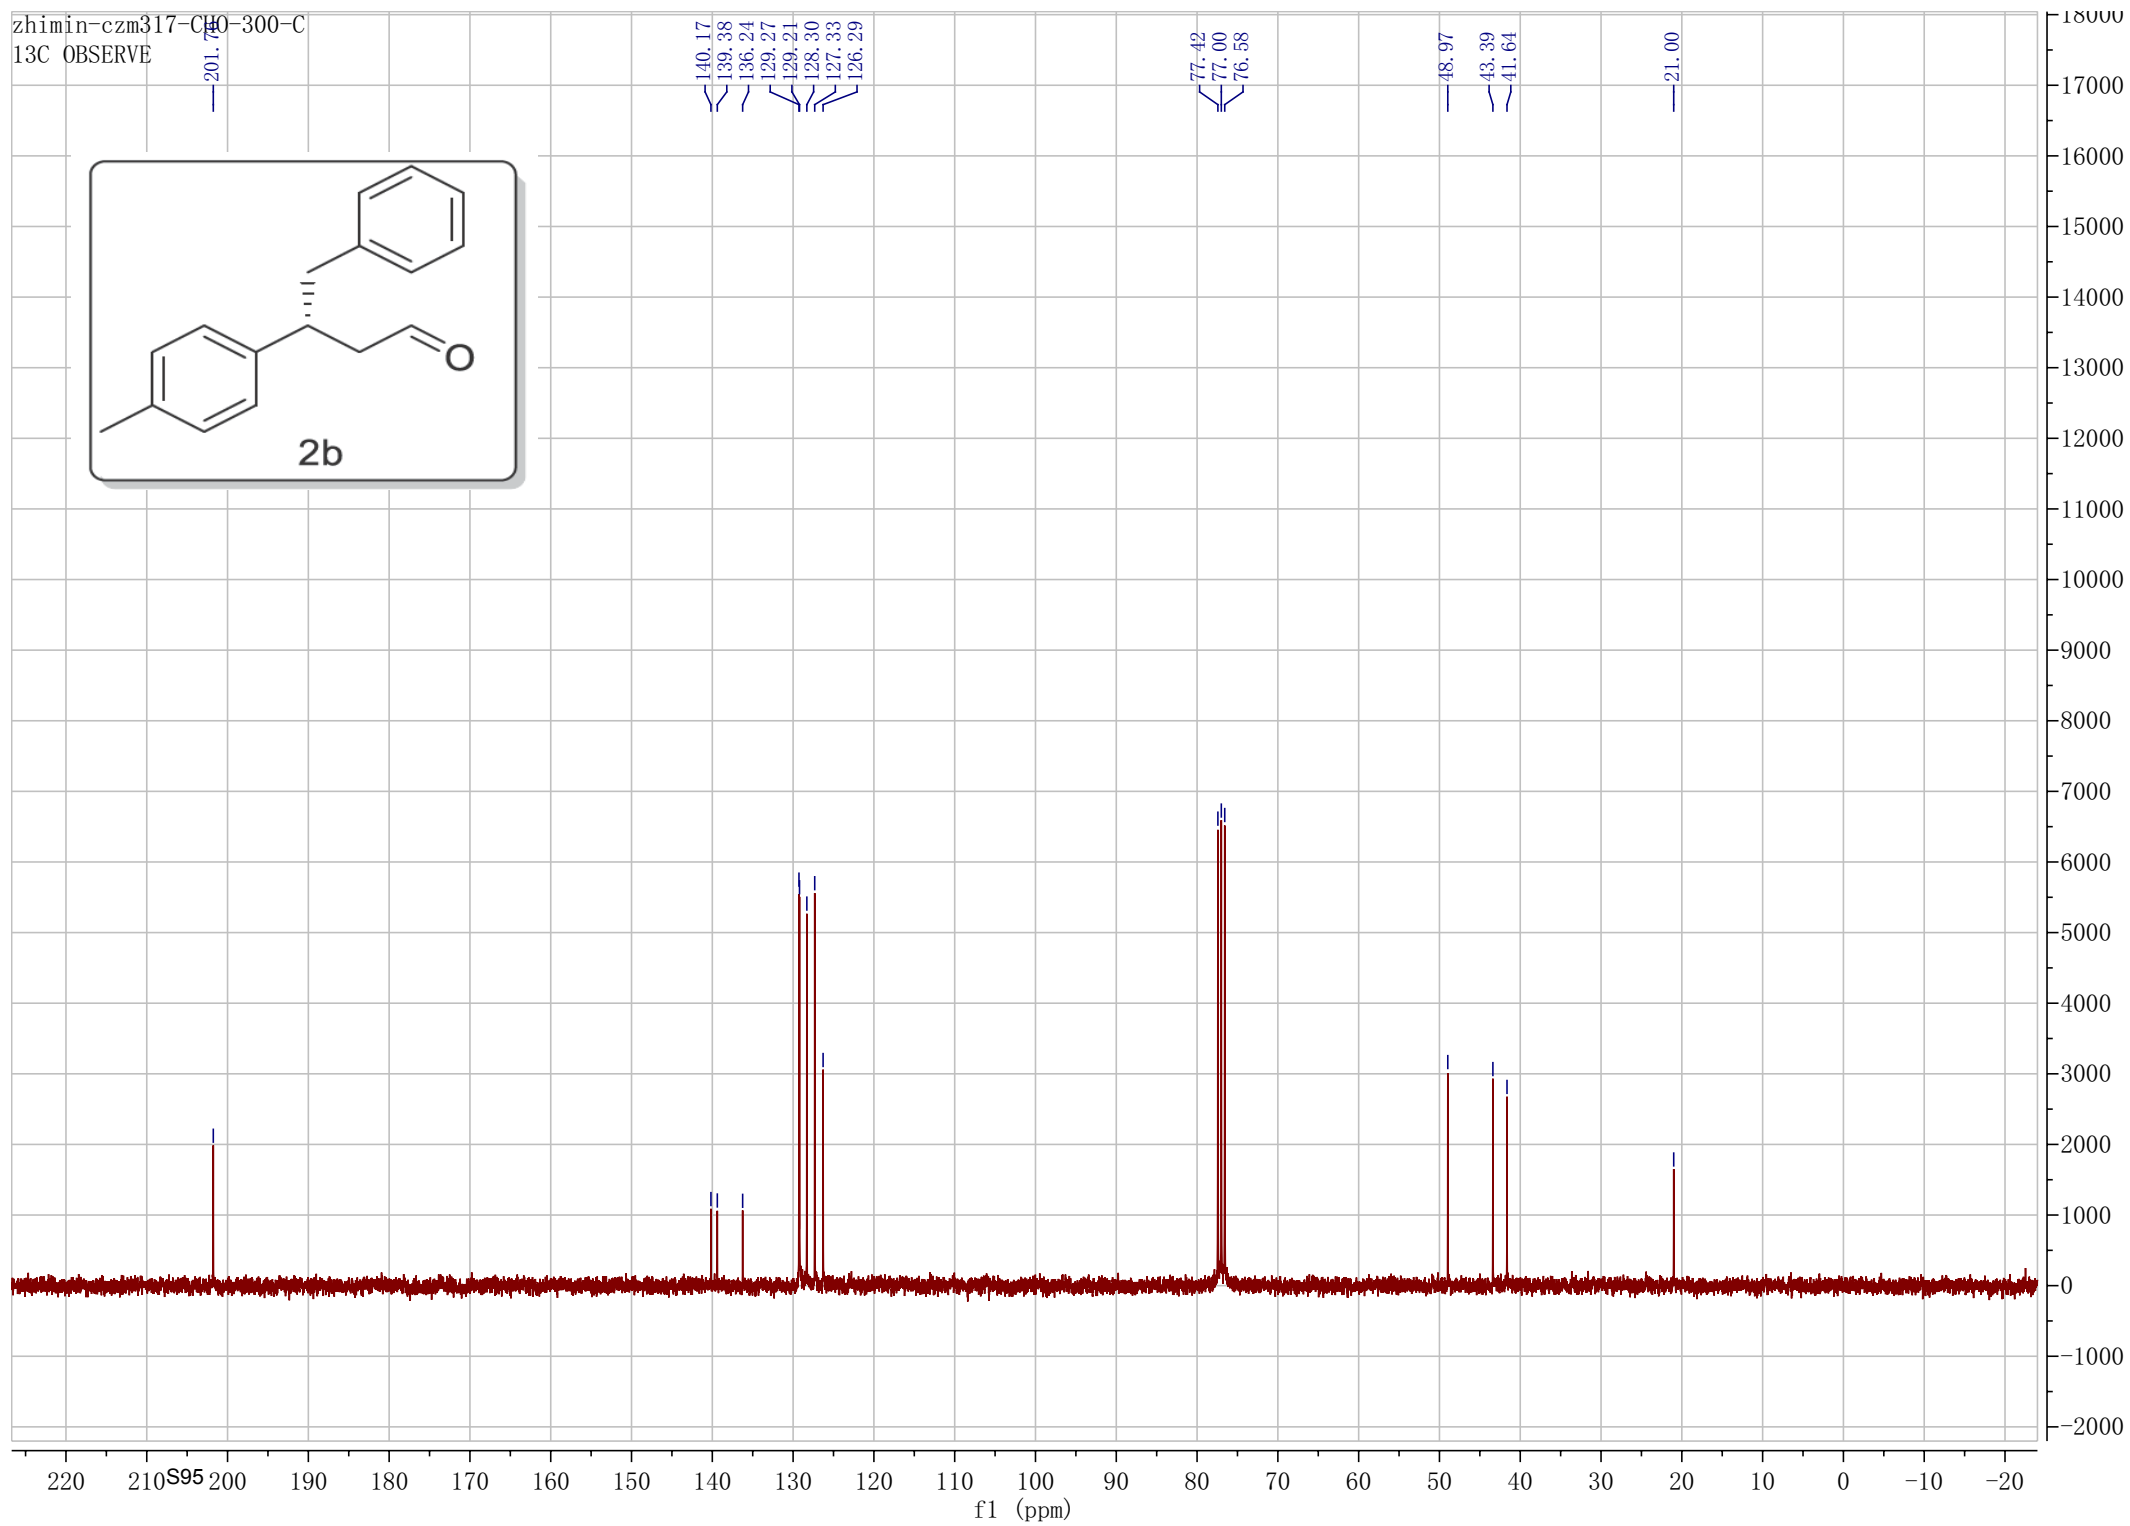

zhimin-czm314-OH-300-H  
UofUtah-Unity300-NMR  
STANDARD 1H OBSERVE

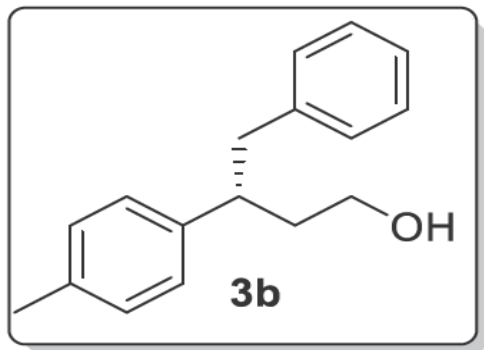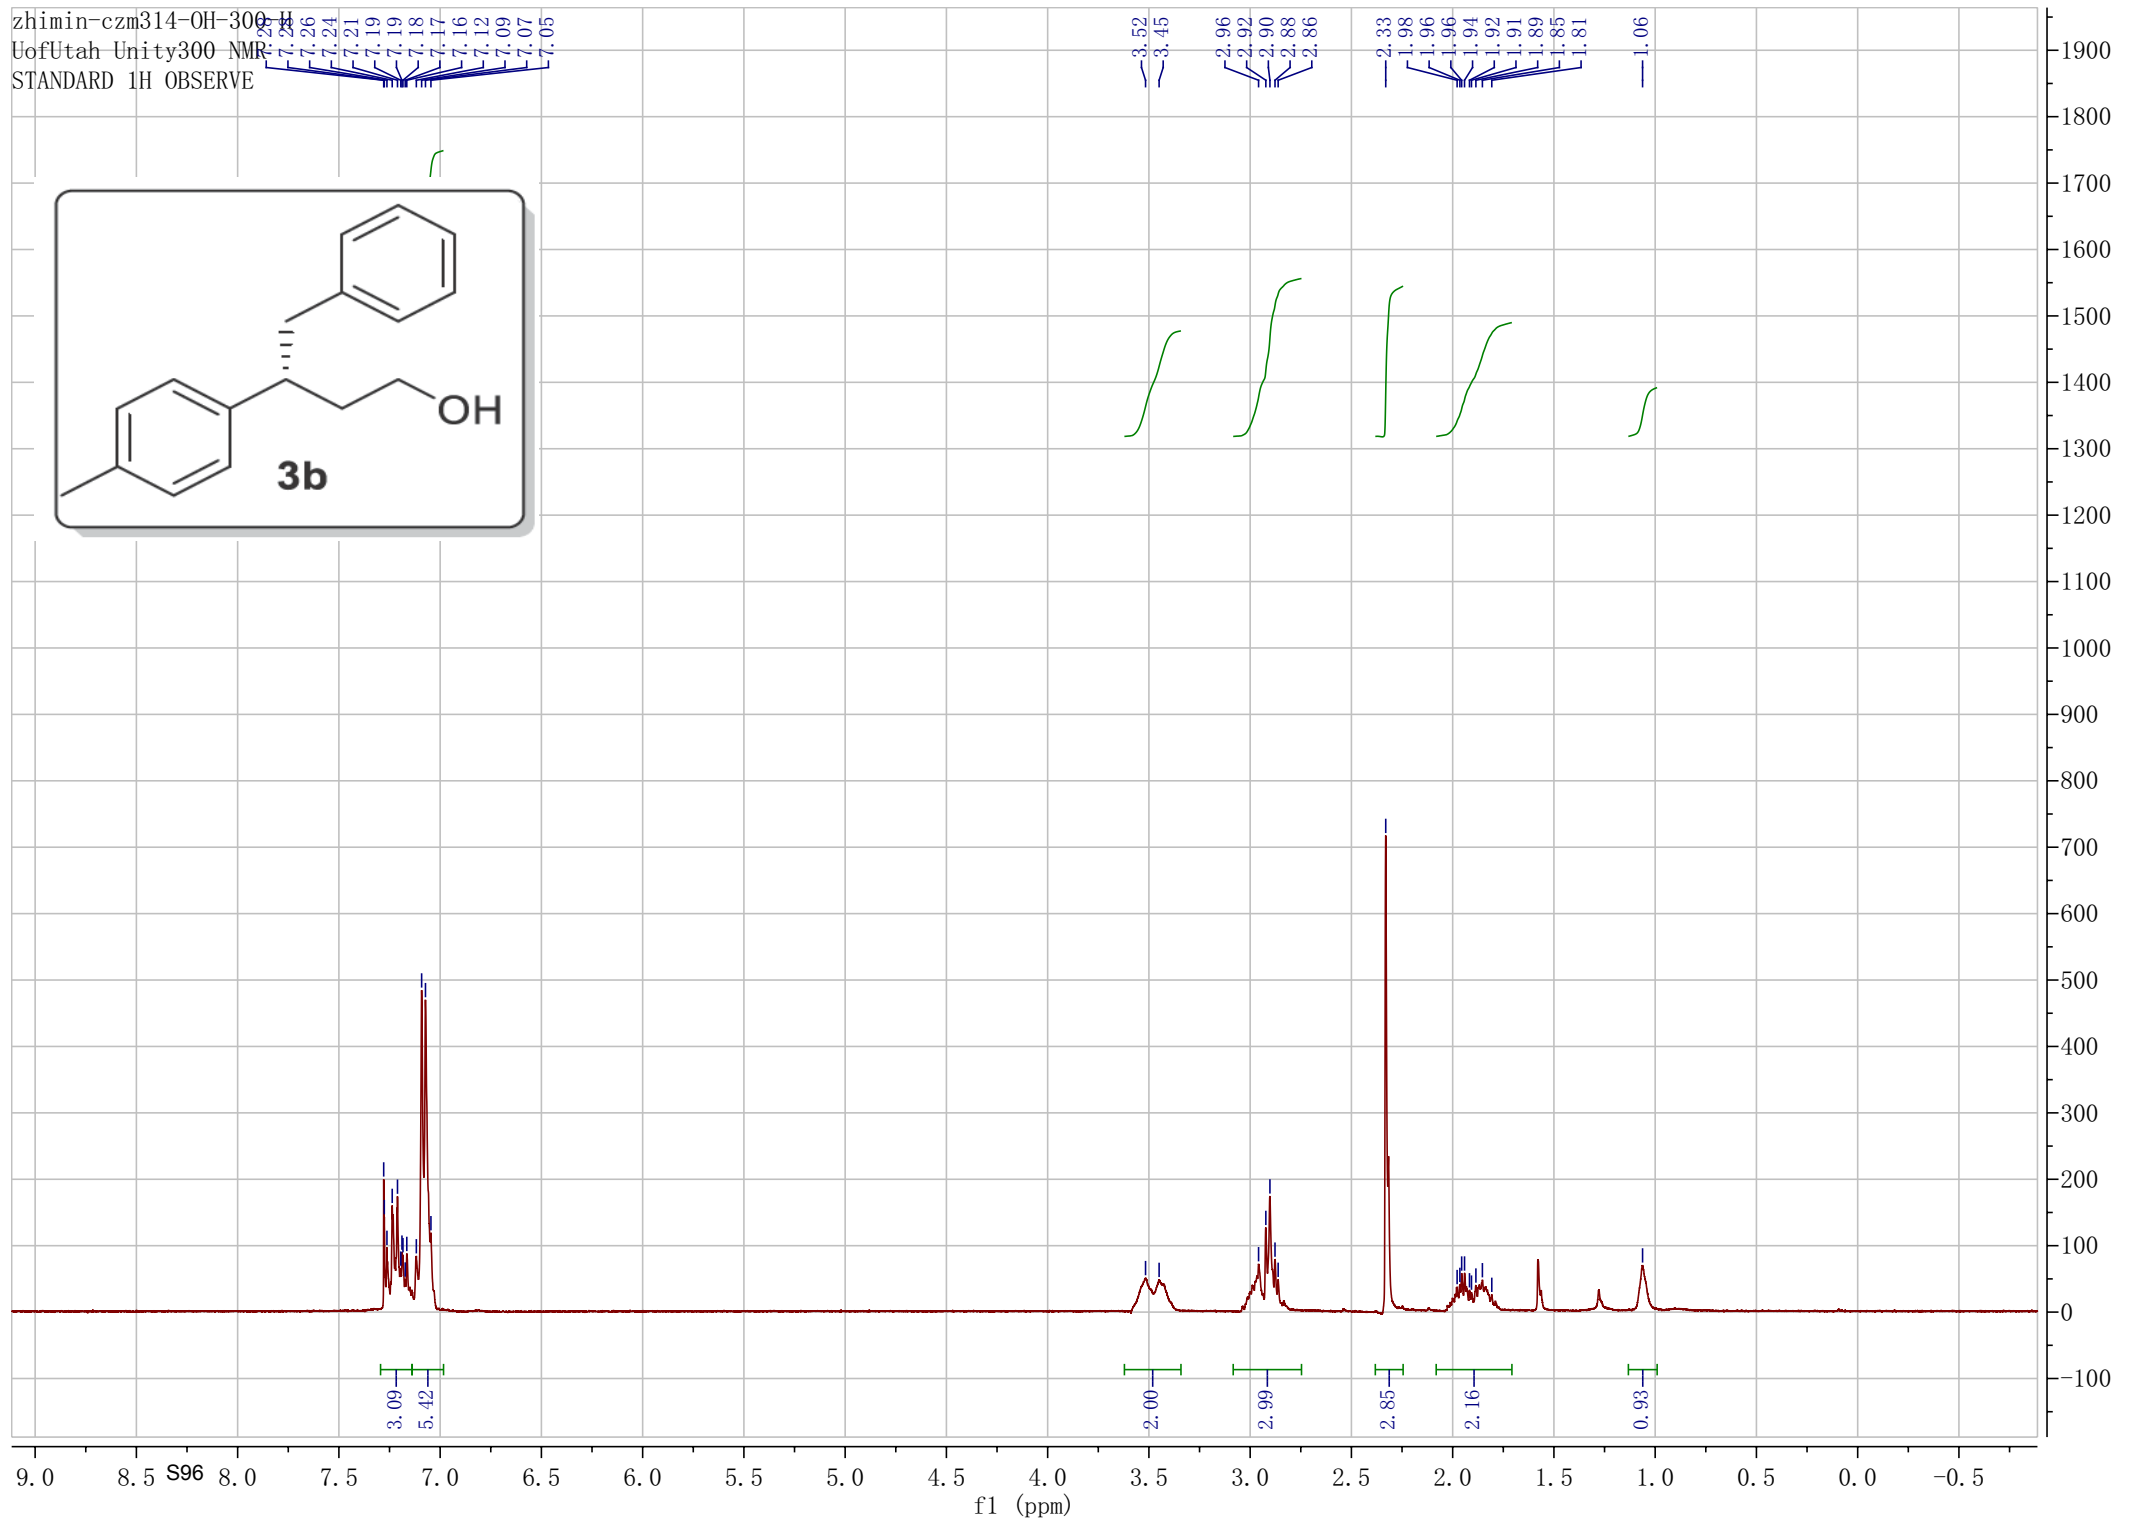

zhimin-czm314-OH-300-C  
13C OBSERVE

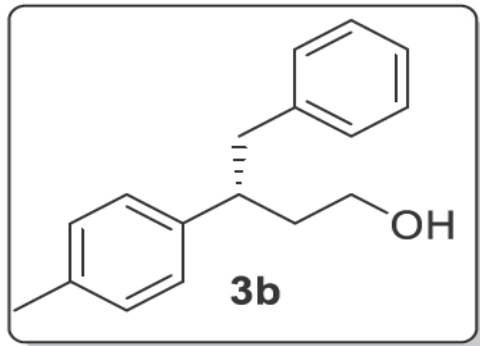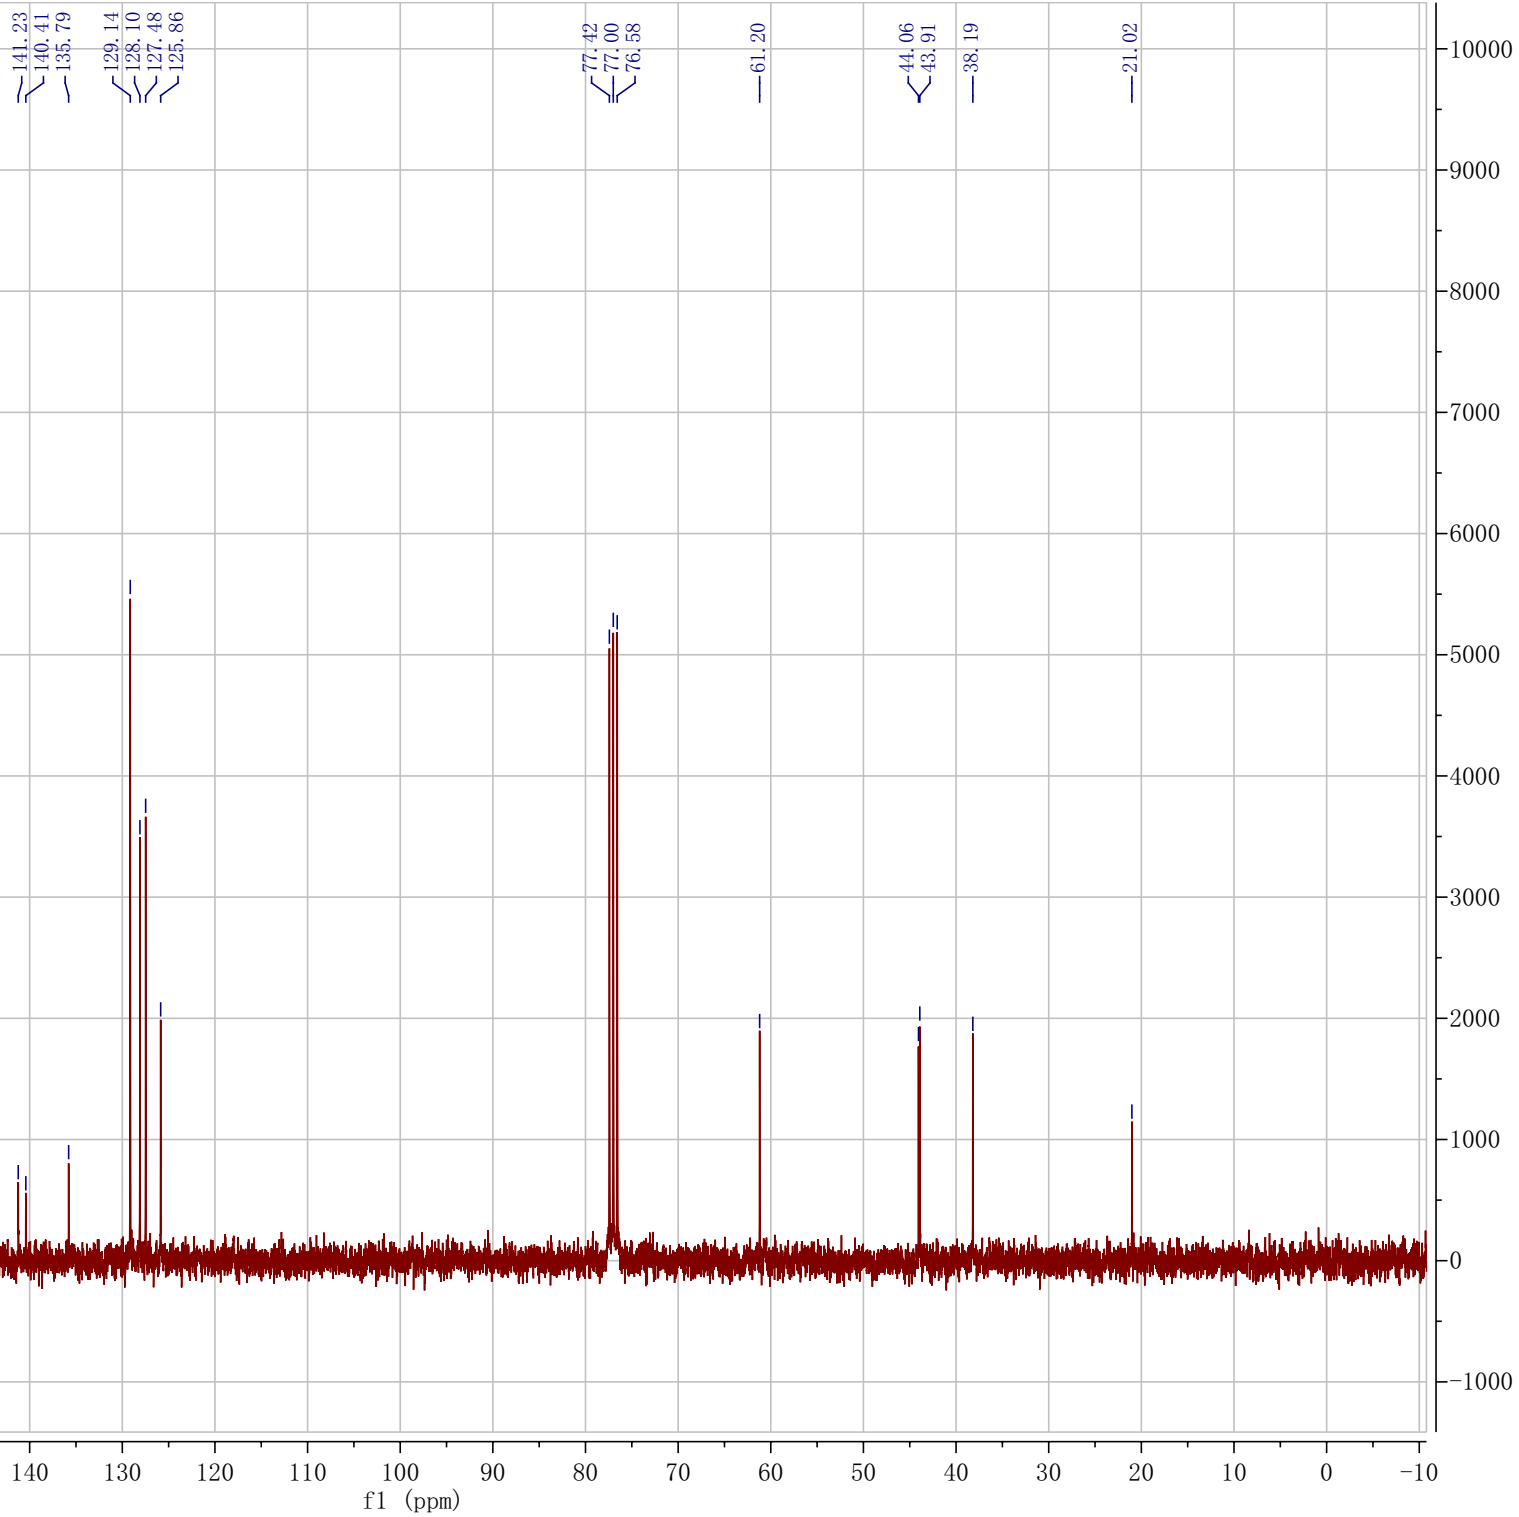

zhimin-czm269-CHO-H  
STANDARD PROTON PARAMETERS

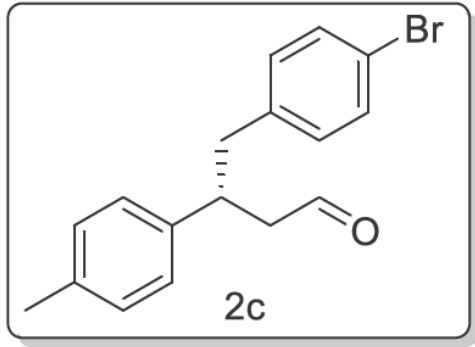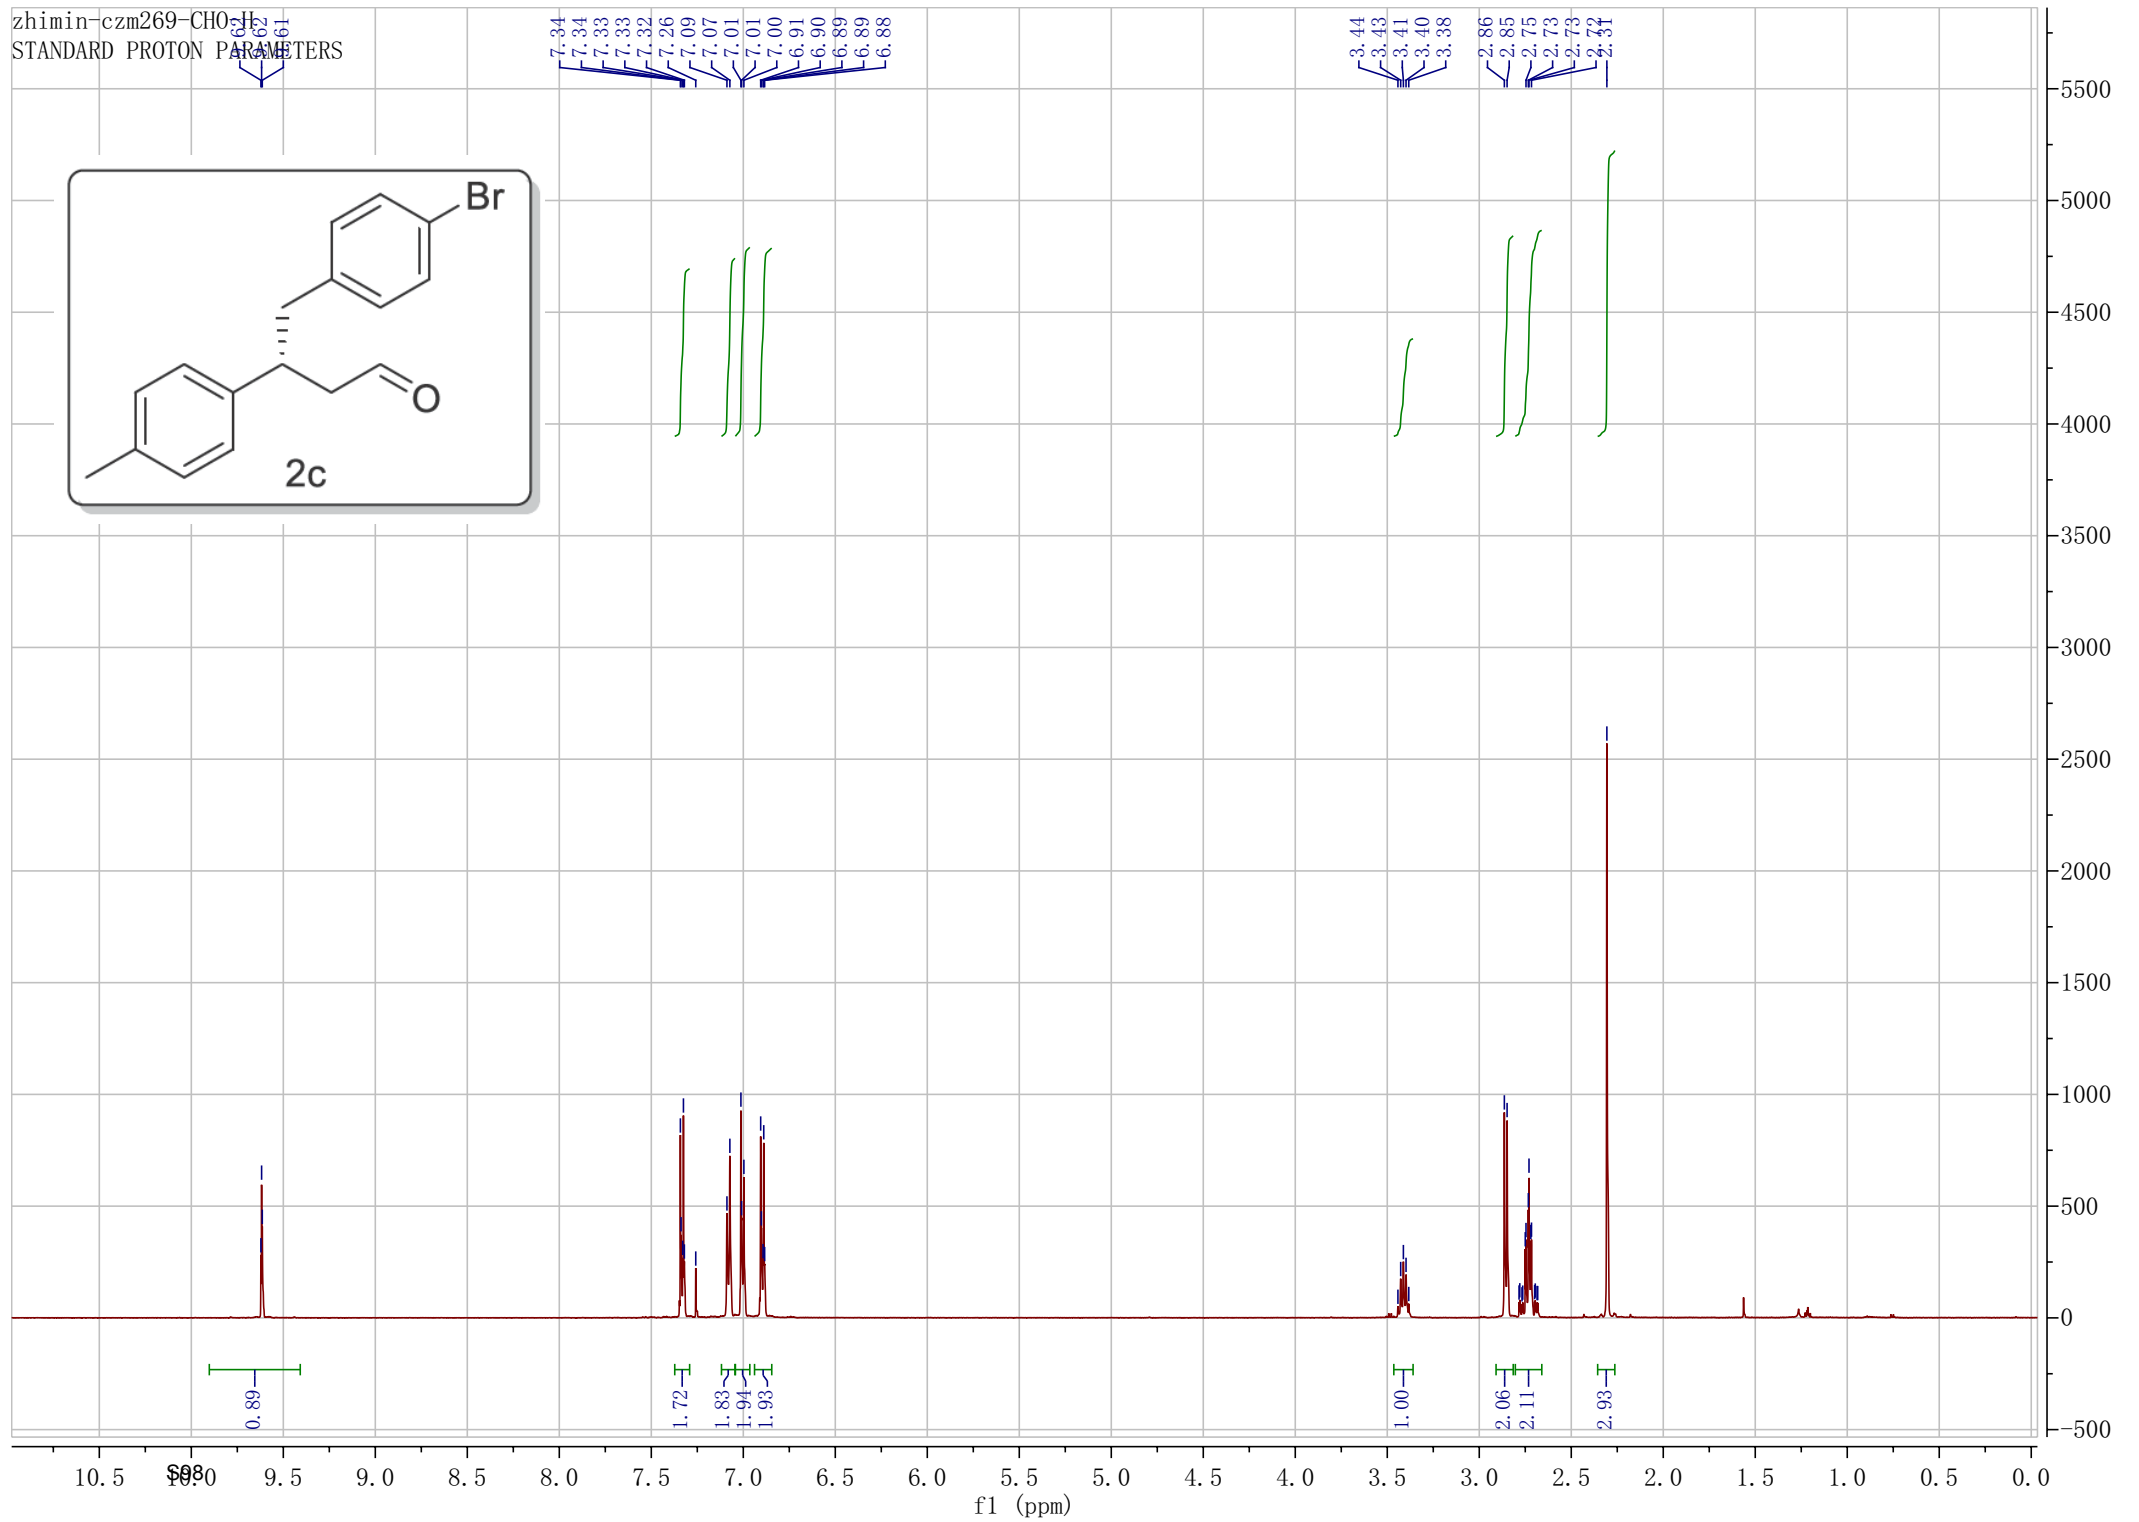



zhimin-gzm269-CHO-C  
STANDARD CARBON PARAMETERS

139.56  
138.33  
136.38  
131.29  
130.90  
129.31  
127.33

77.25  
77.00  
76.75

49.12

42.55  
41.35

20.99

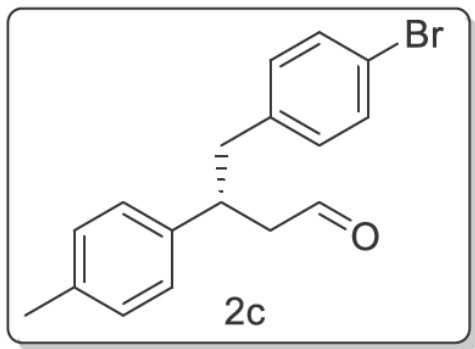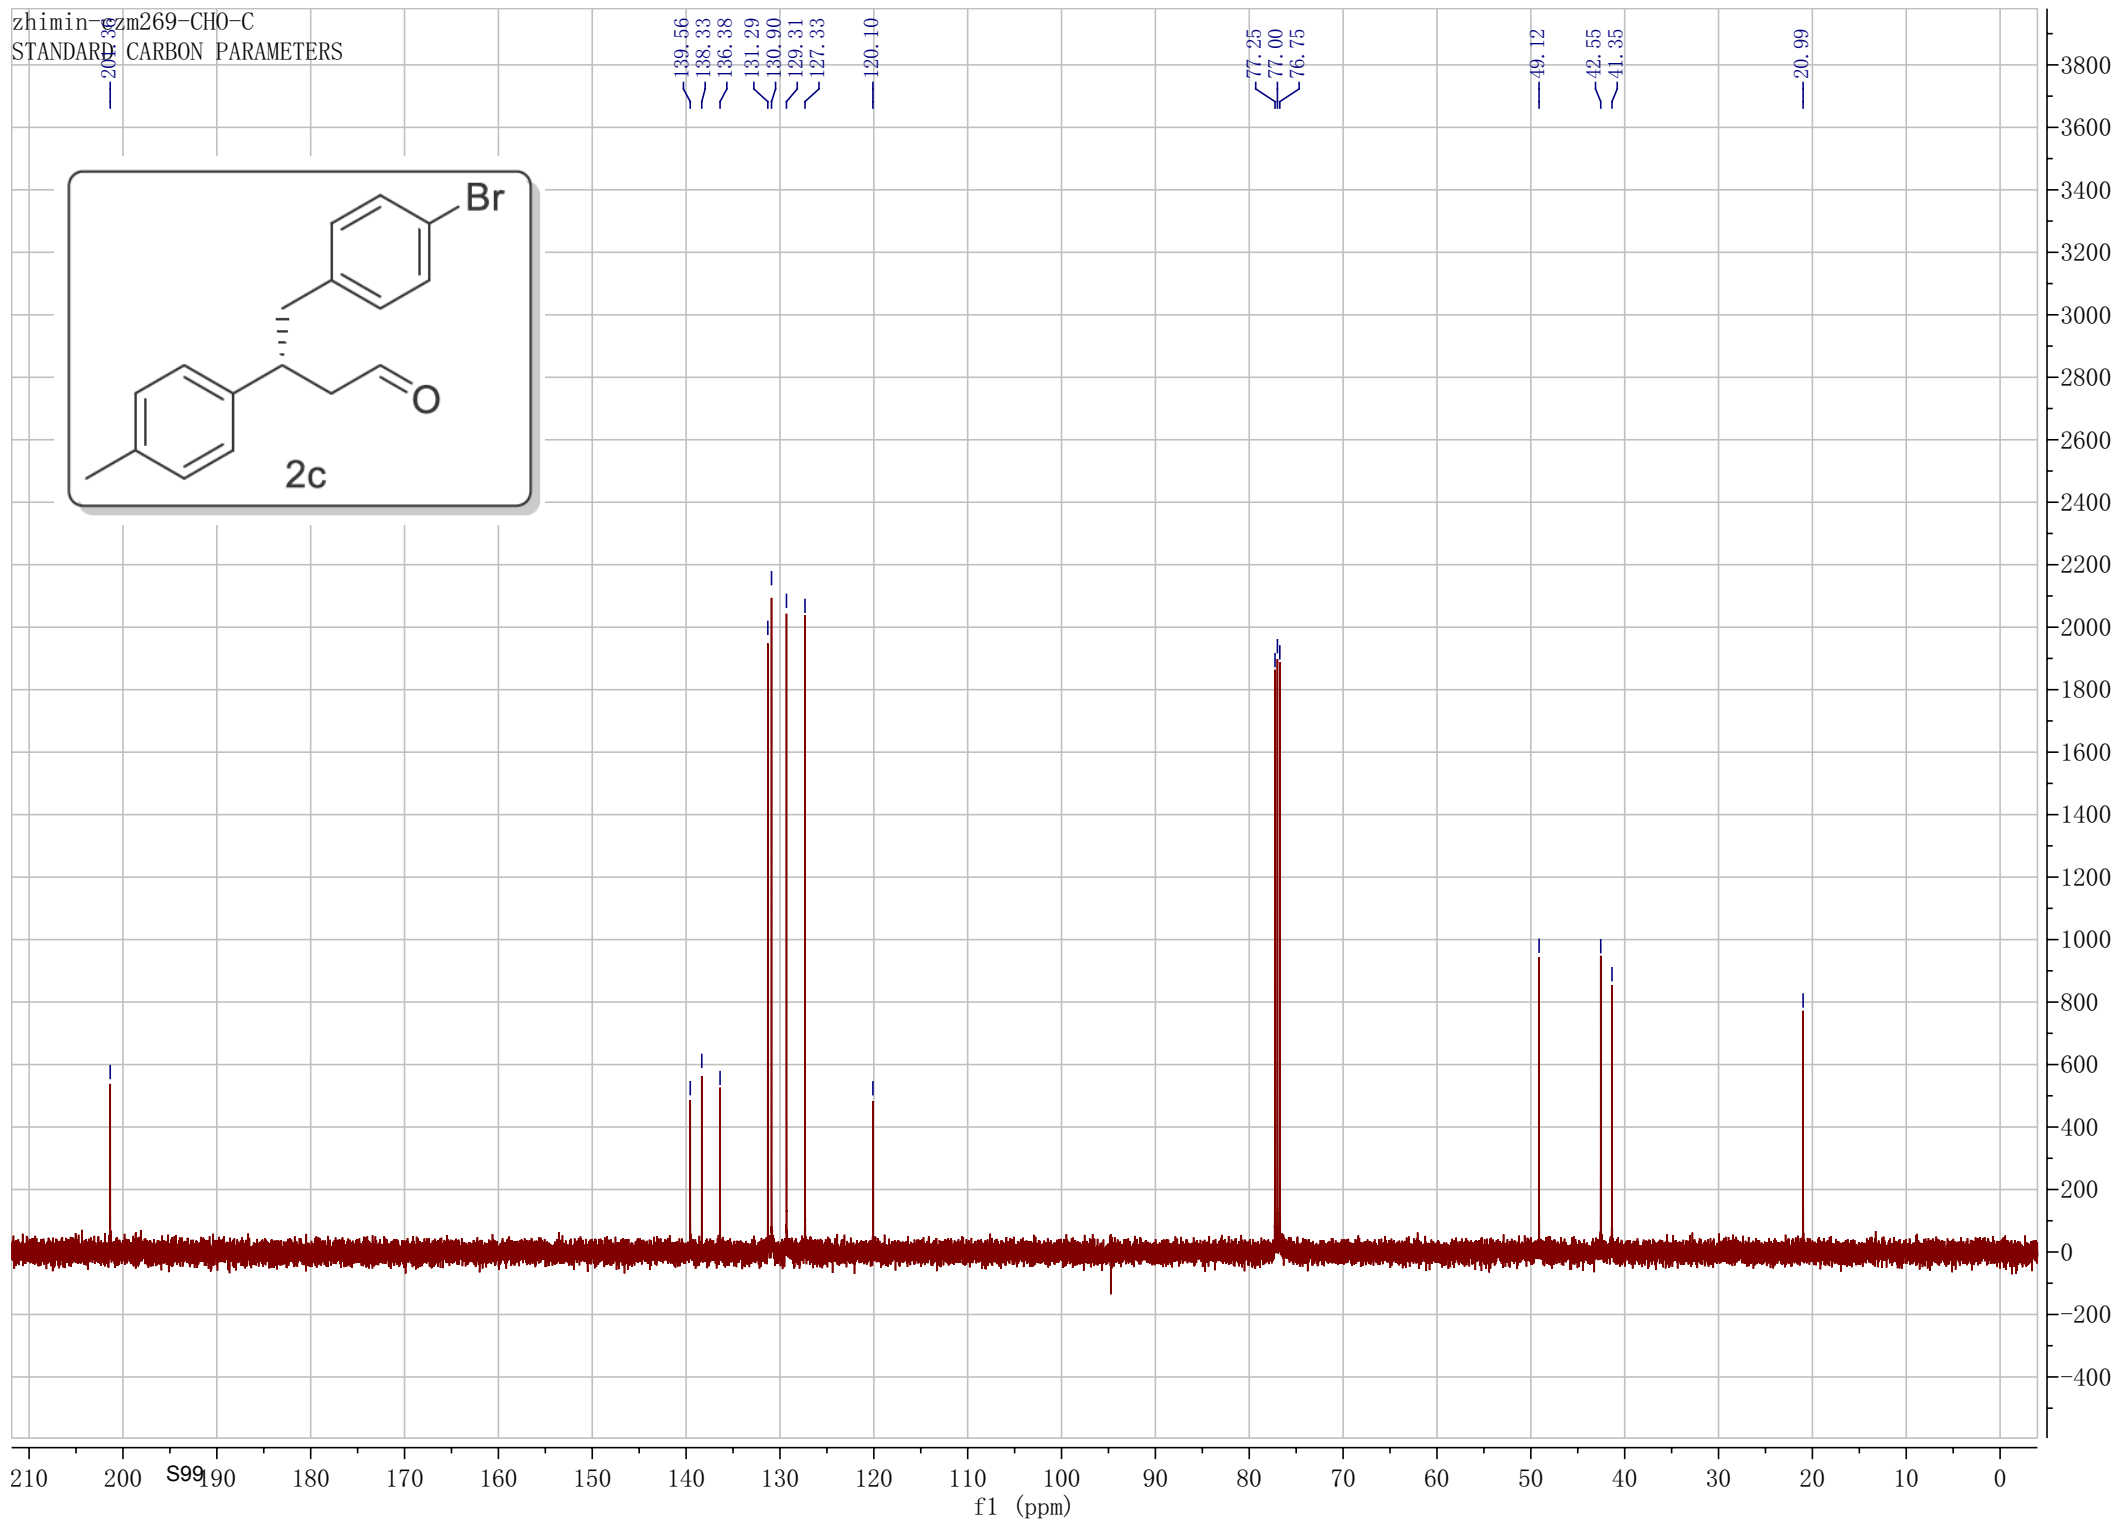

7.32  
7.32  
7.30  
7.26  
7.26  
7.08  
7.06  
7.00  
6.99  
6.90  
6.88

3.53  
3.52  
3.43  
3.42  
2.95  
2.94  
2.93  
2.84  
2.81  
1.94  
1.94  
1.93  
1.93  
1.92  
1.86  
1.84  
1.83

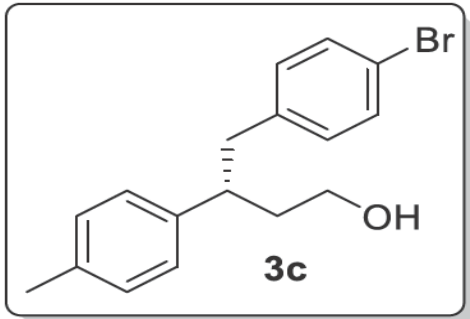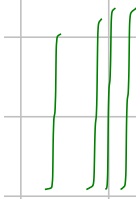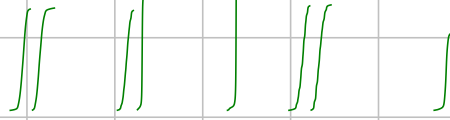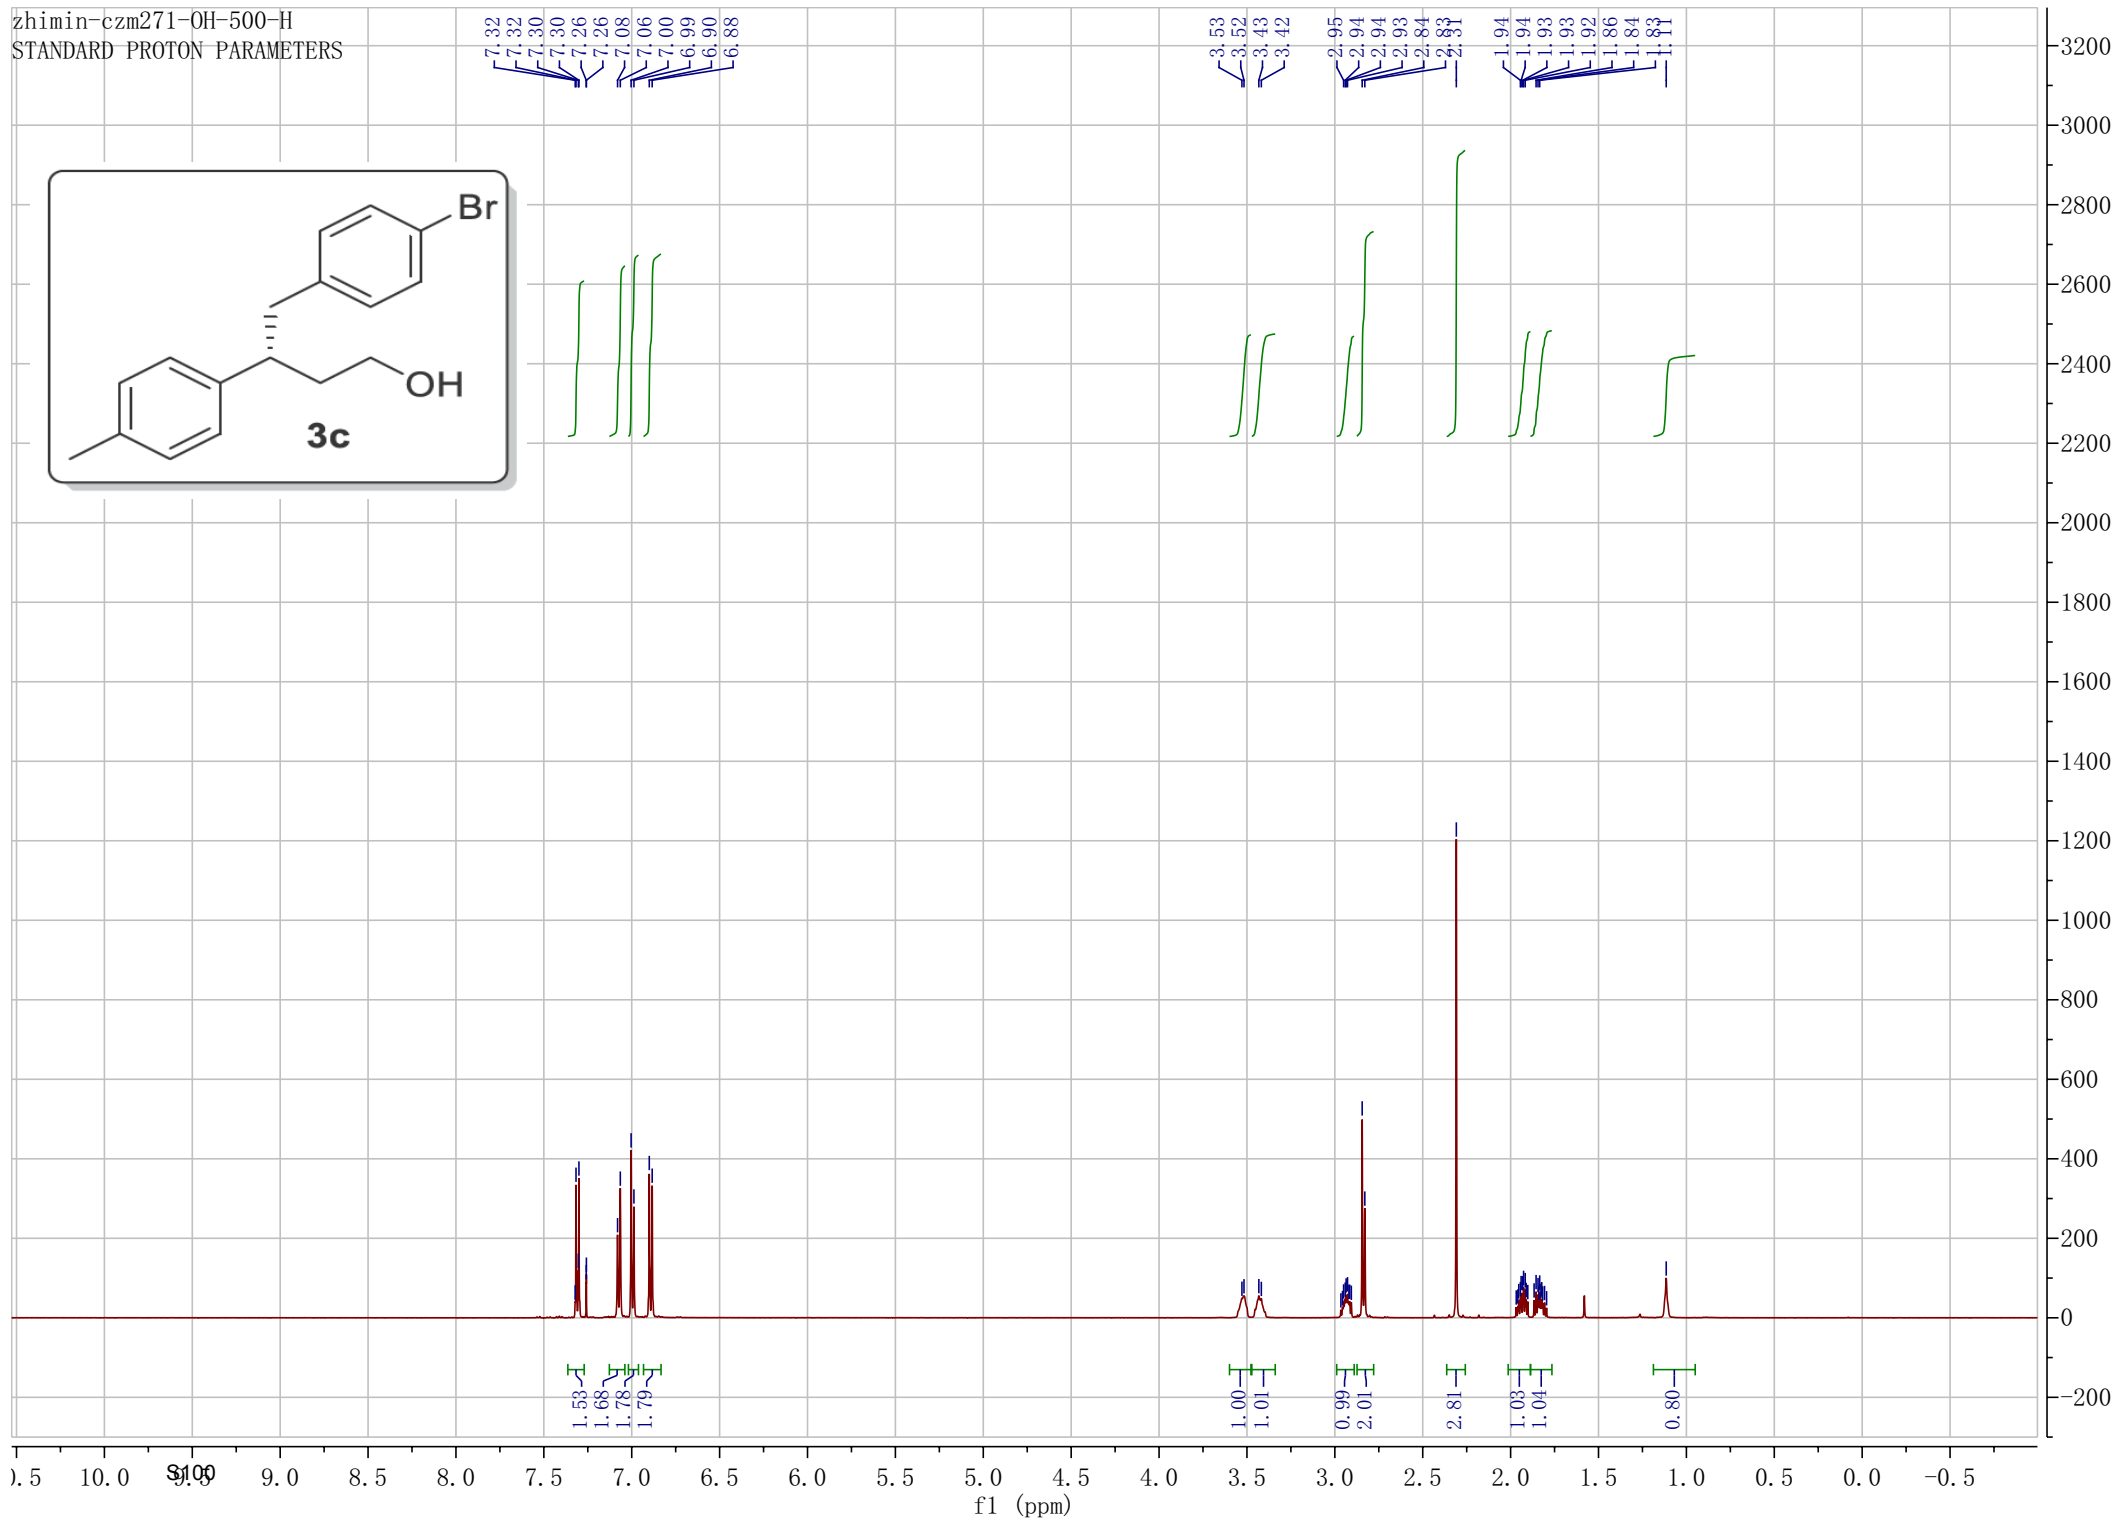

zhimin-czm271-OH-300-C  
13C OBSERVE

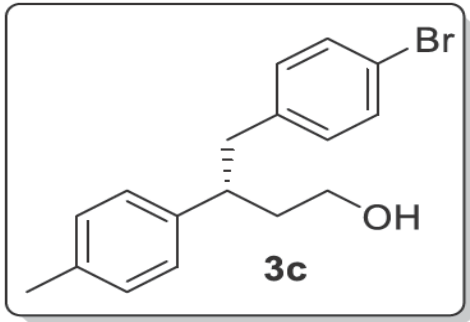

140.57  
139.32  
135.93  
131.09  
130.85  
129.17  
127.48  
119.65

77.42  
77.00  
76.58

60.98

43.88  
43.18

38.29

21.01

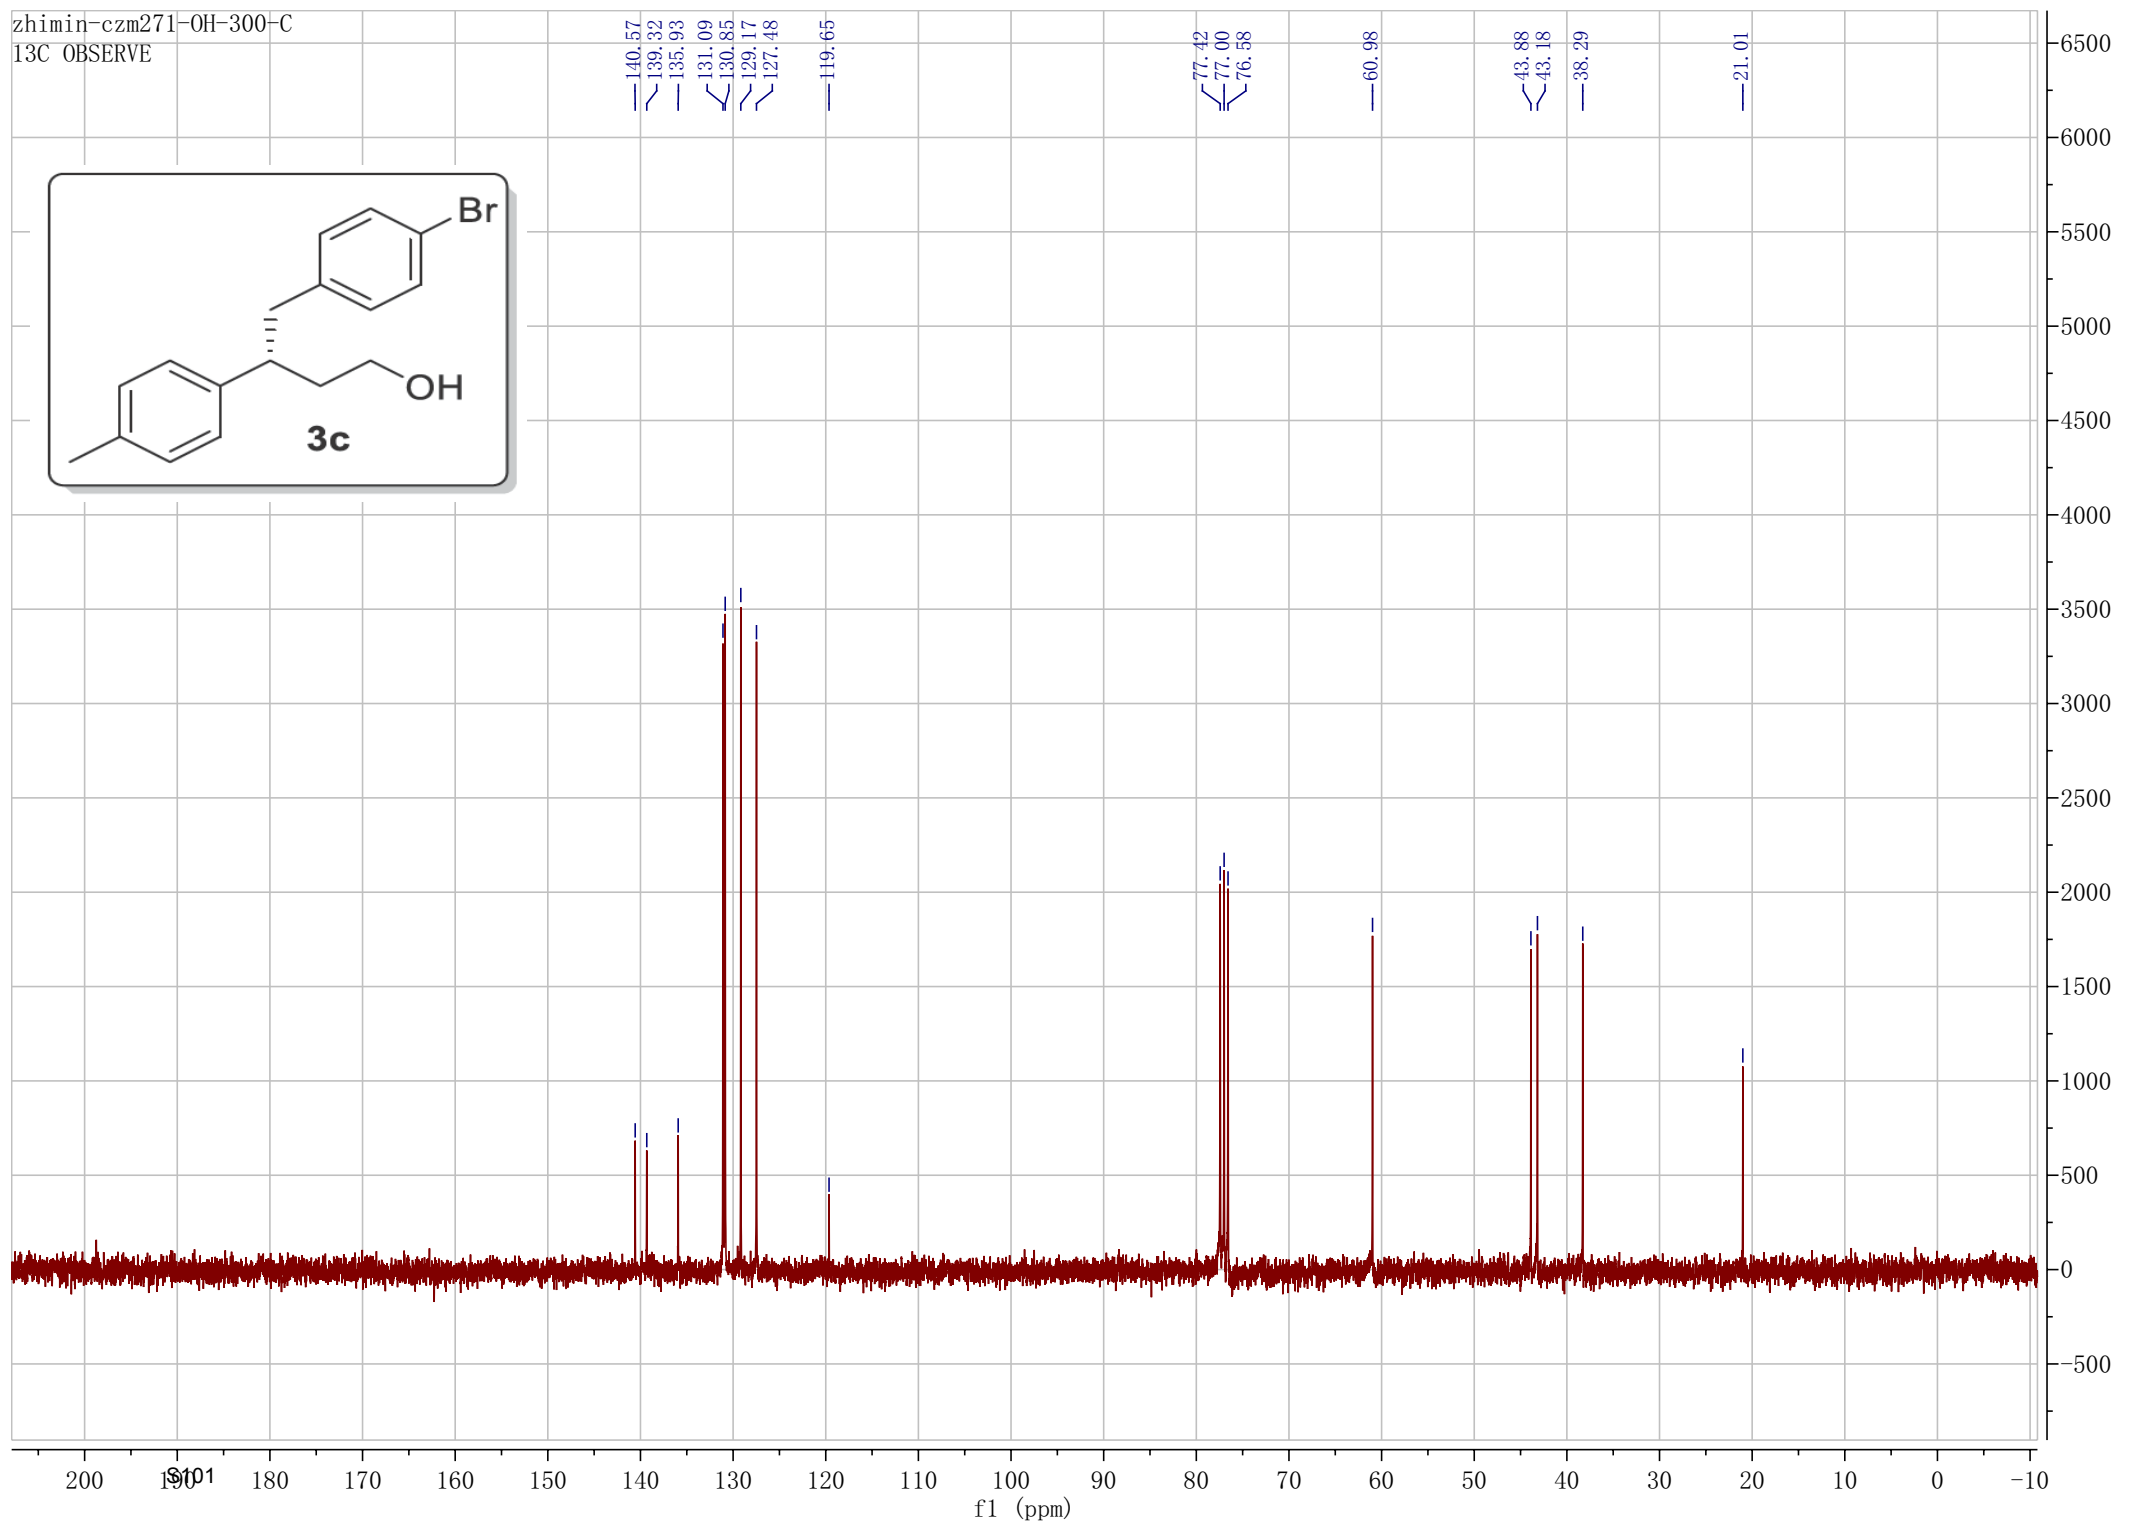

zhimin-czm298-CHO-H  
STANDARD PROTON PARAMETERS

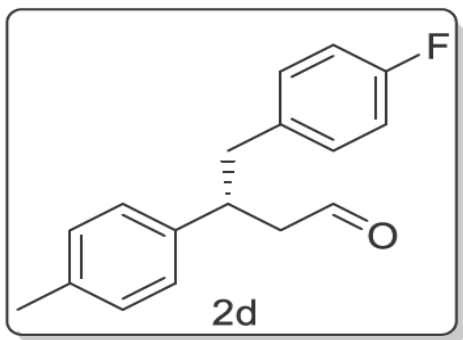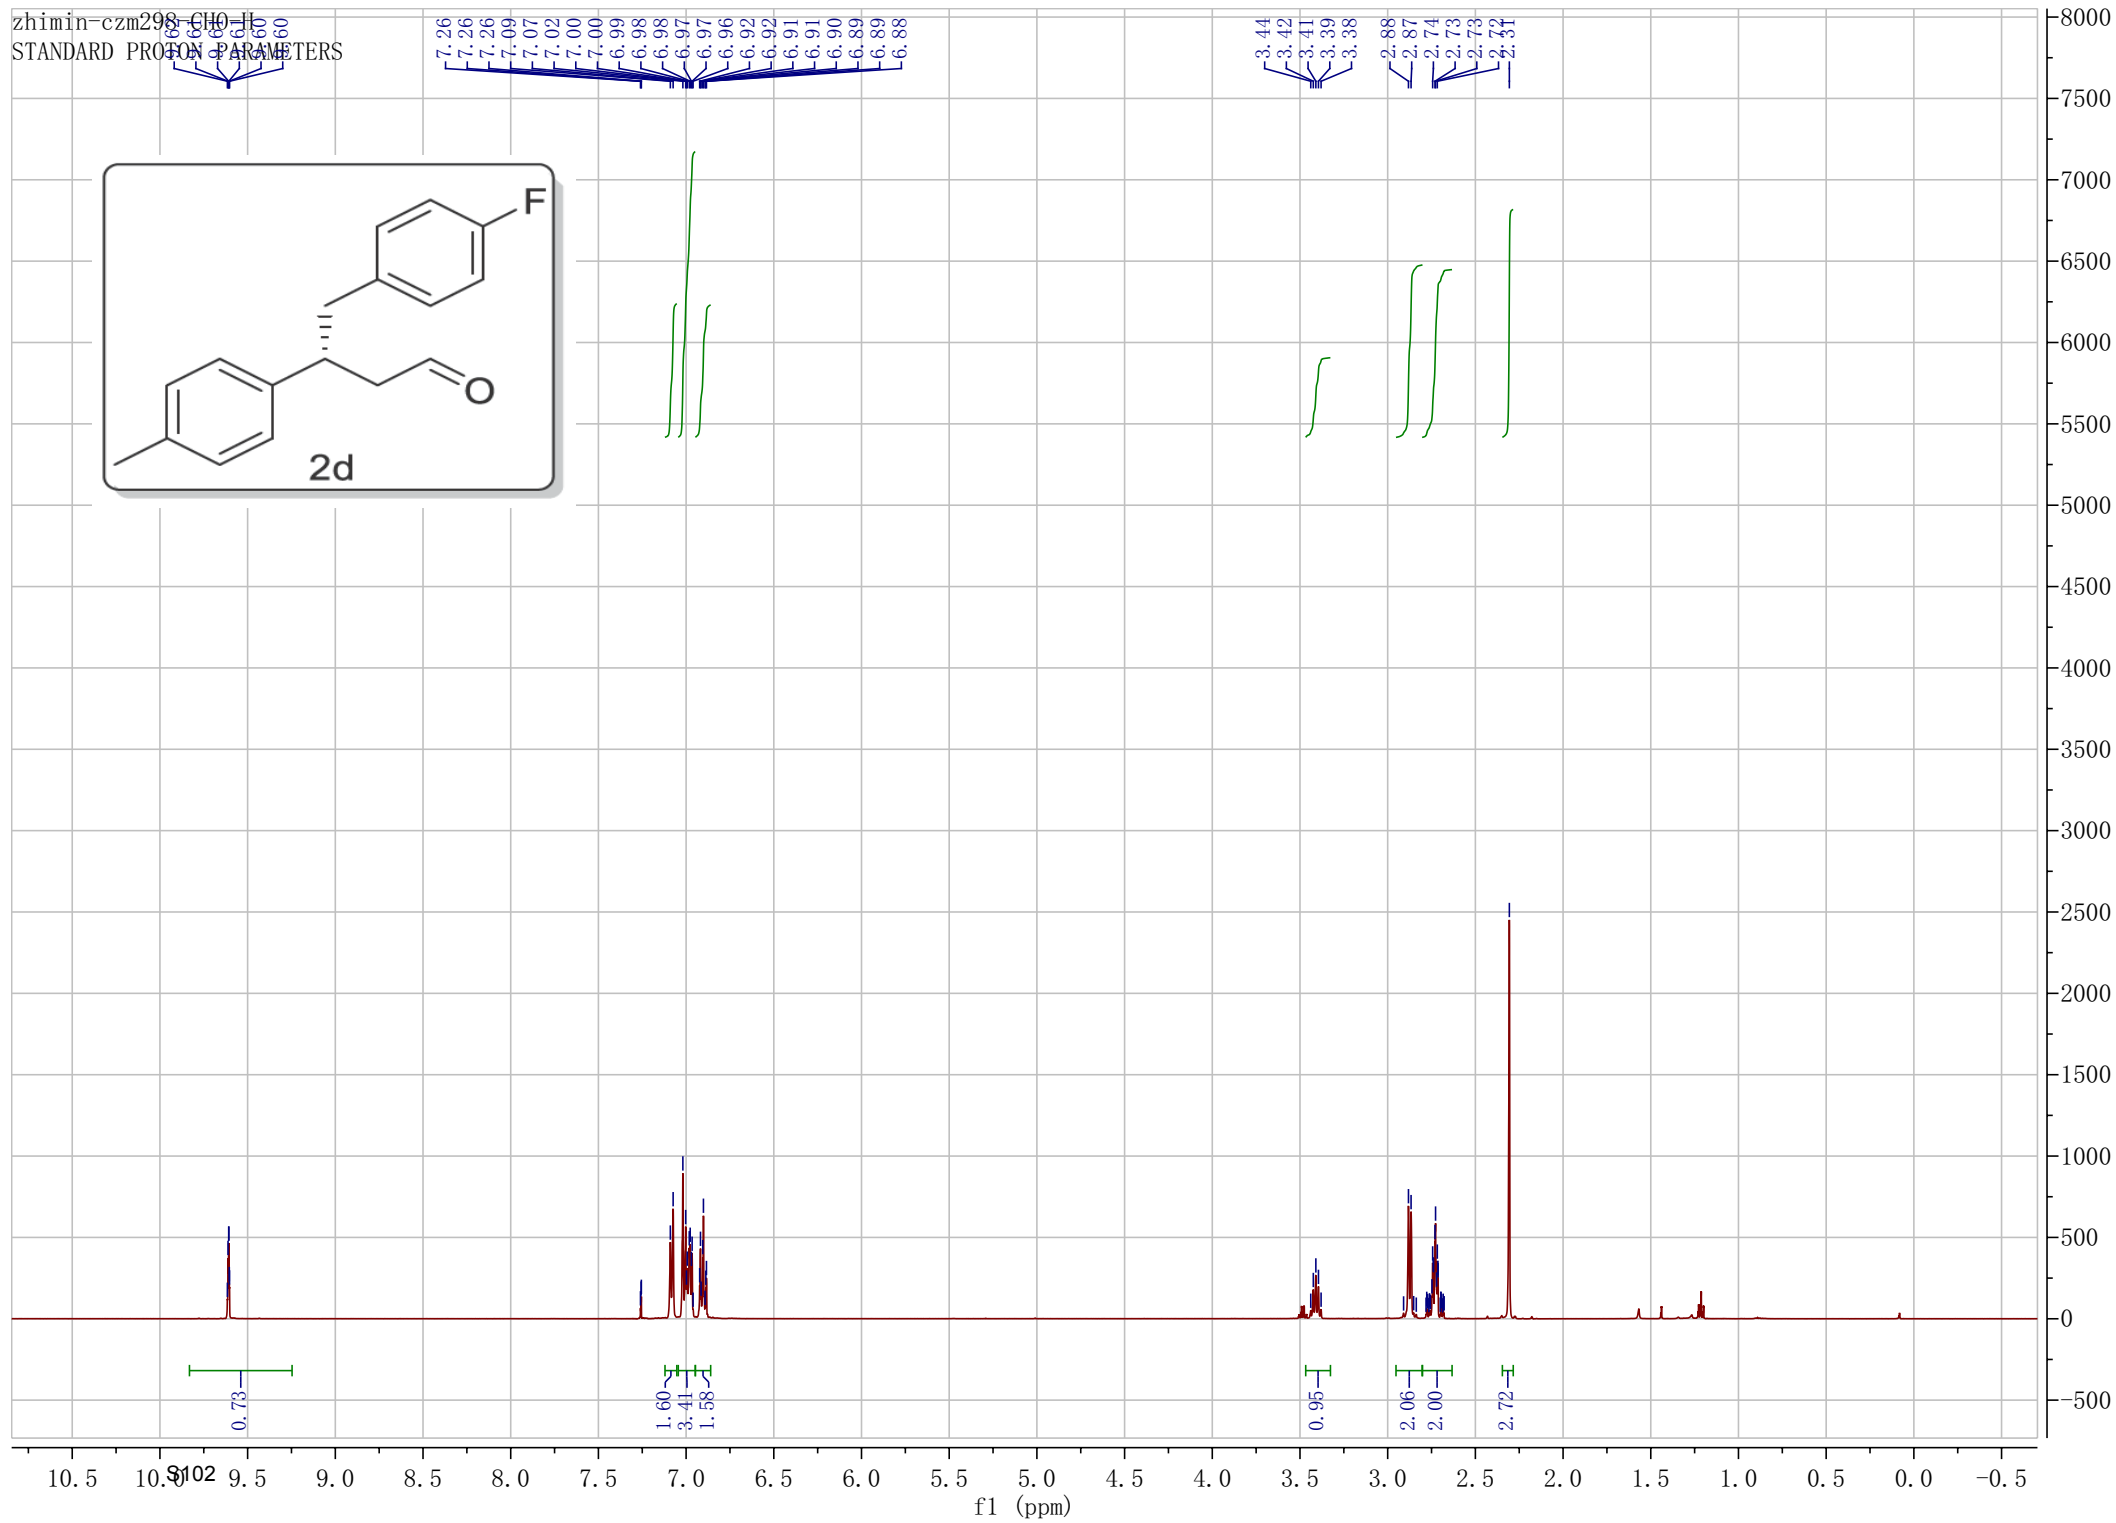

zhimin-2023-02-28-12-28-CHO-C  
STANDARD CARBON PARAMETERS

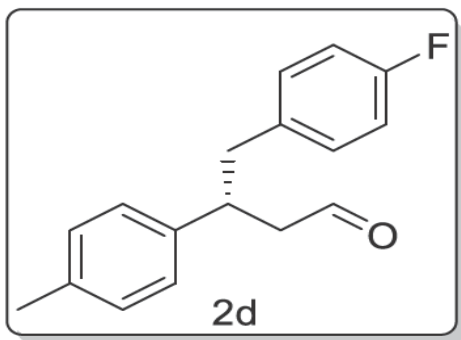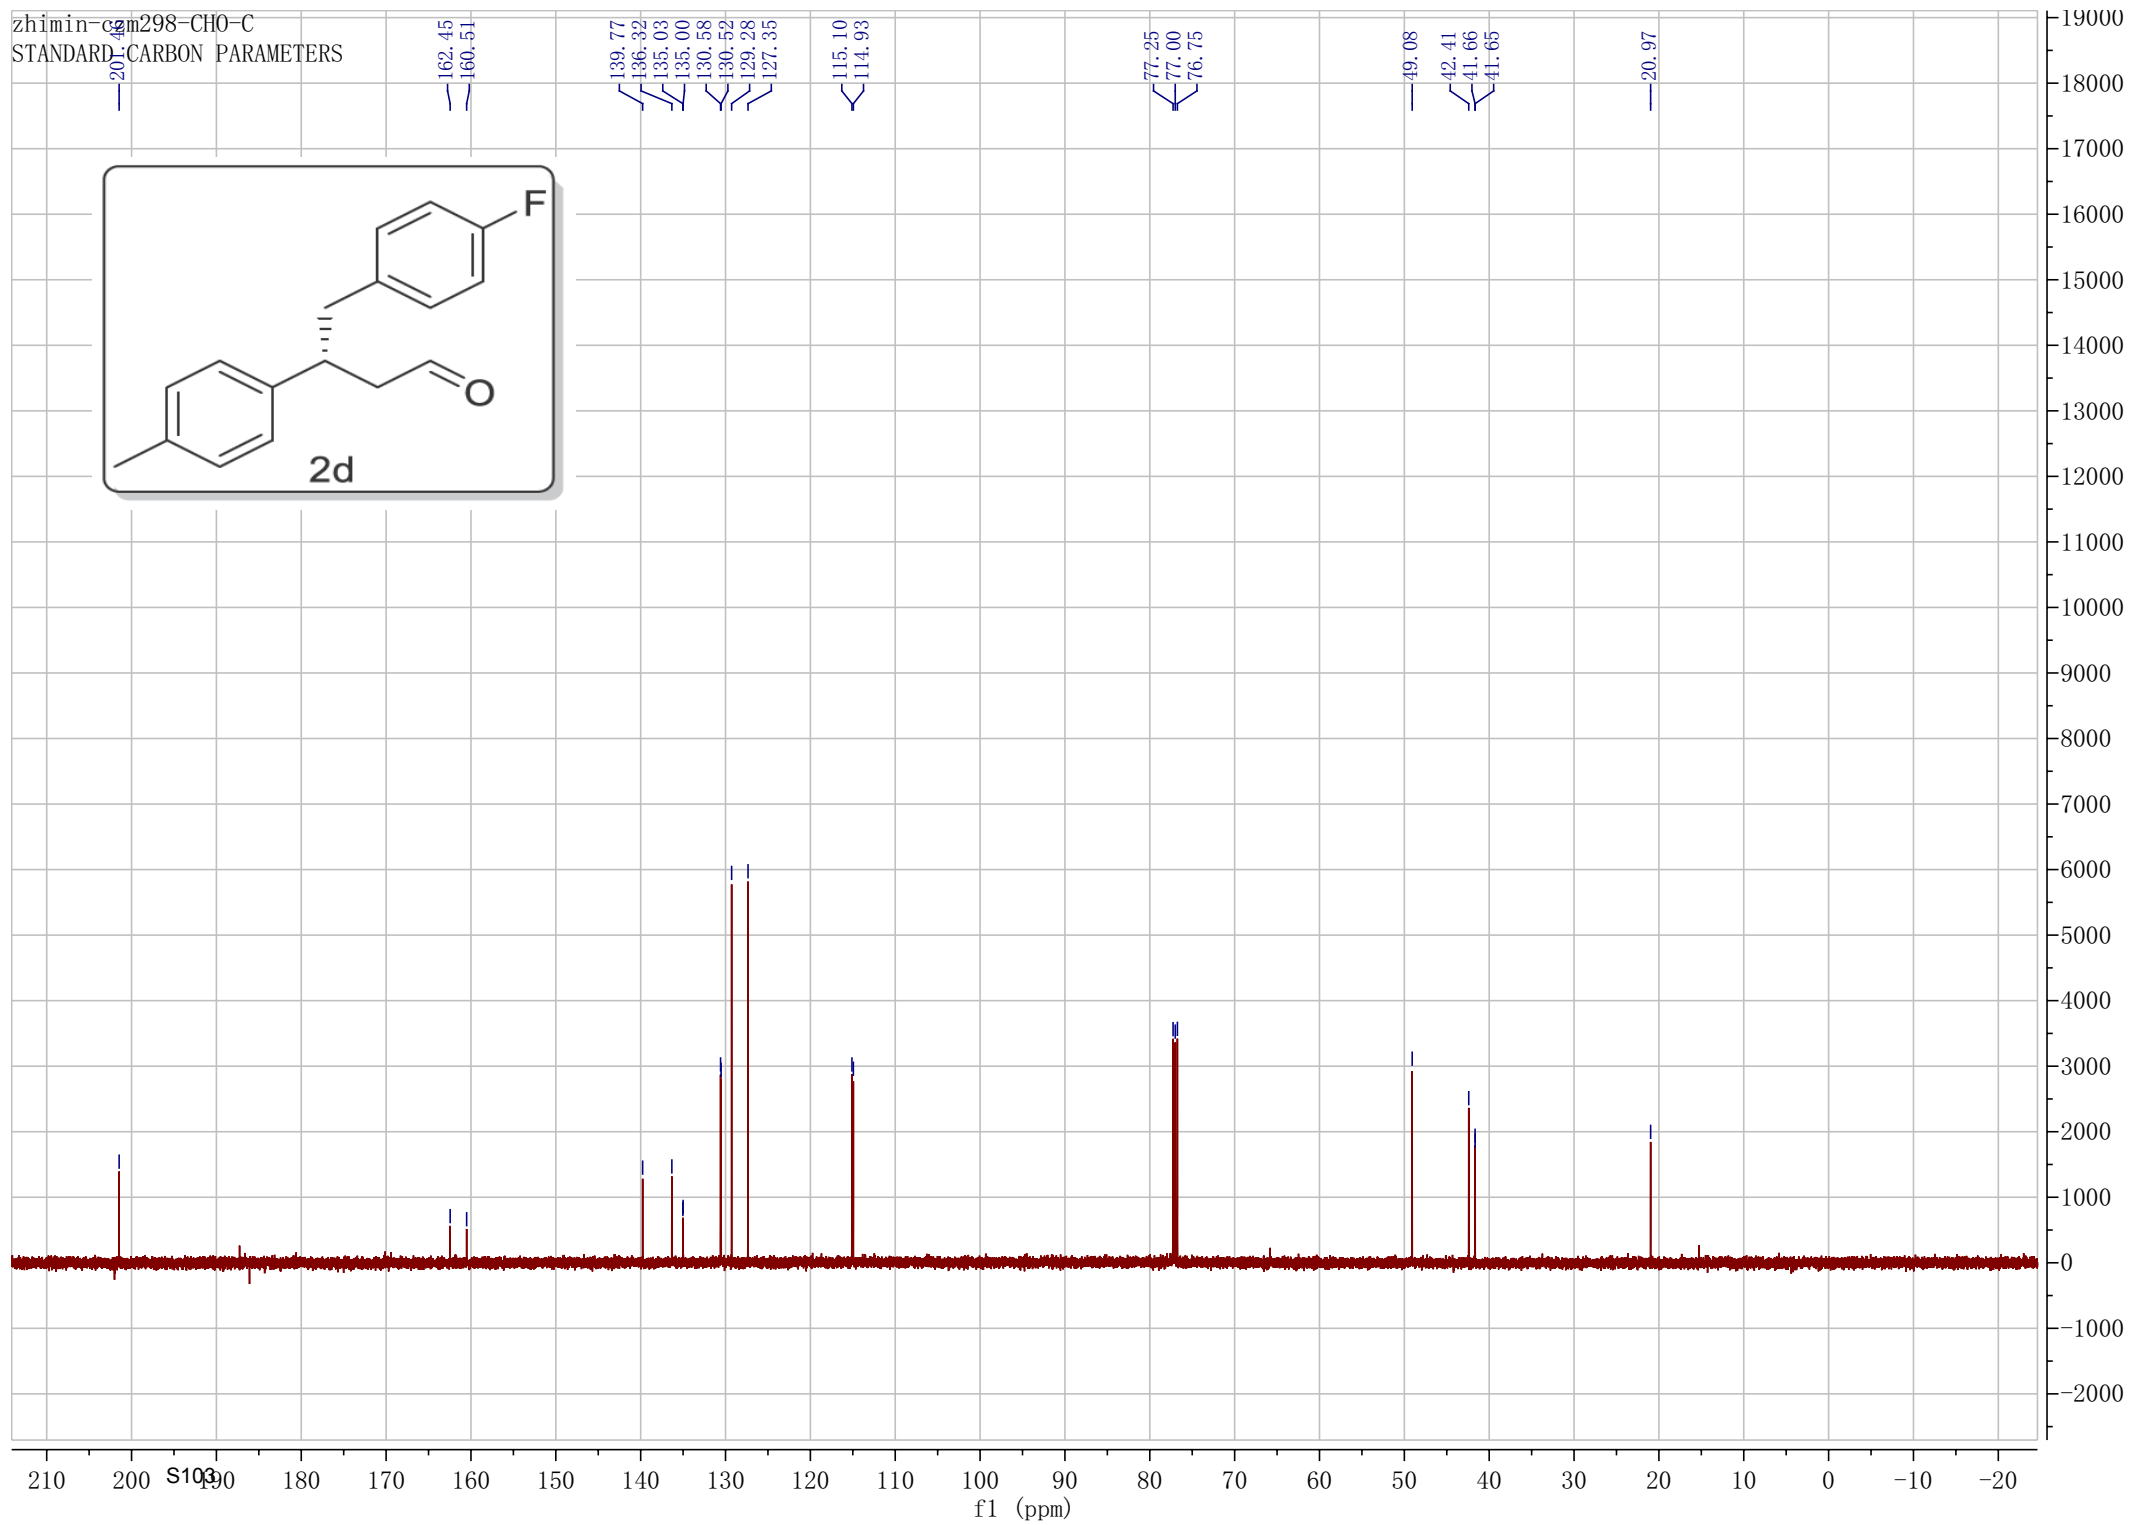

zhimin-czm298-CHO-300-F

<sup>19</sup>F OBSERVE

STANDARD PARAMETERS

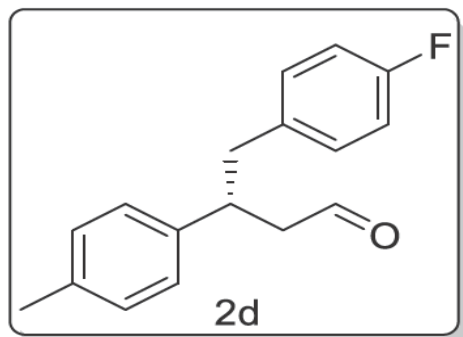

-119.53

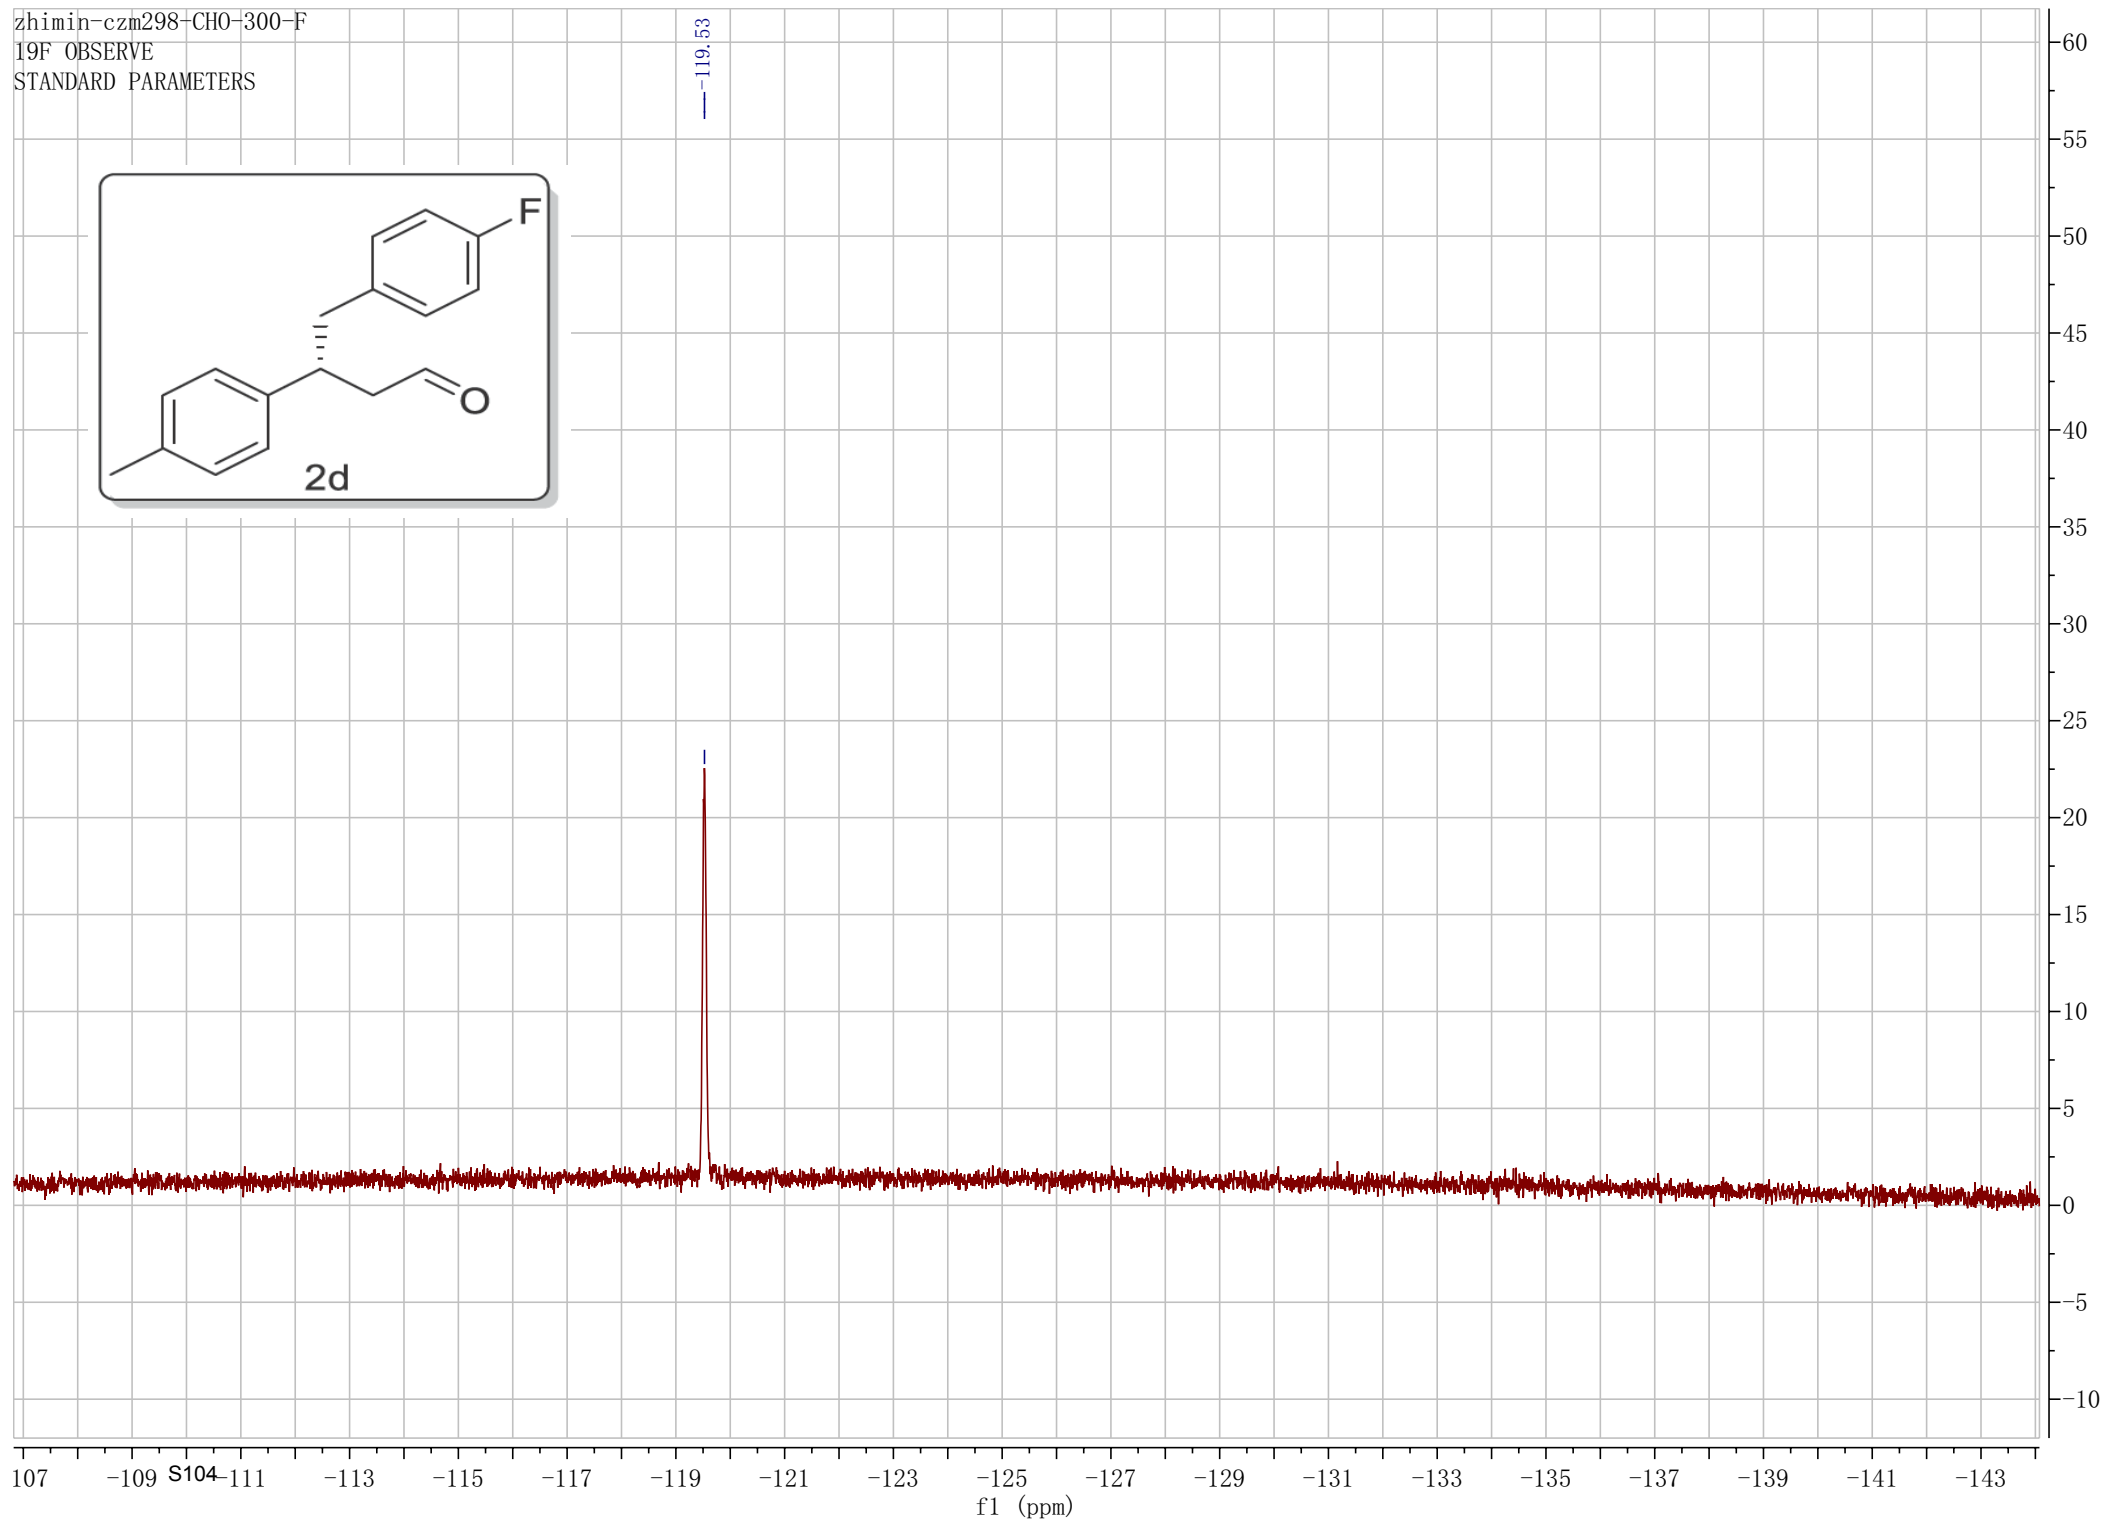

zhimin-czm272-OH-300-H  
UofUtah Unity300 NMR  
STANDARD 1H OBSERVE

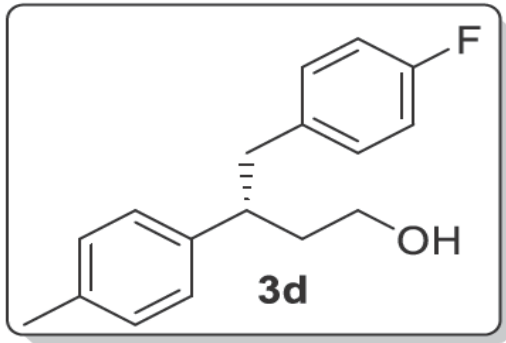

7.26  
7.10  
7.10  
7.07  
7.02  
7.00  
6.99  
6.98  
6.97  
6.96  
6.95  
6.92  
6.91  
6.91  
6.89  
6.88  
6.88  
6.86  
6.85

3.53  
3.51  
3.49  
3.44  
3.41  
2.93  
2.92  
2.90  
2.87  
2.85  
2.84  
1.96  
1.94  
1.93  
1.92  
1.91  
1.89  
1.87  
1.84

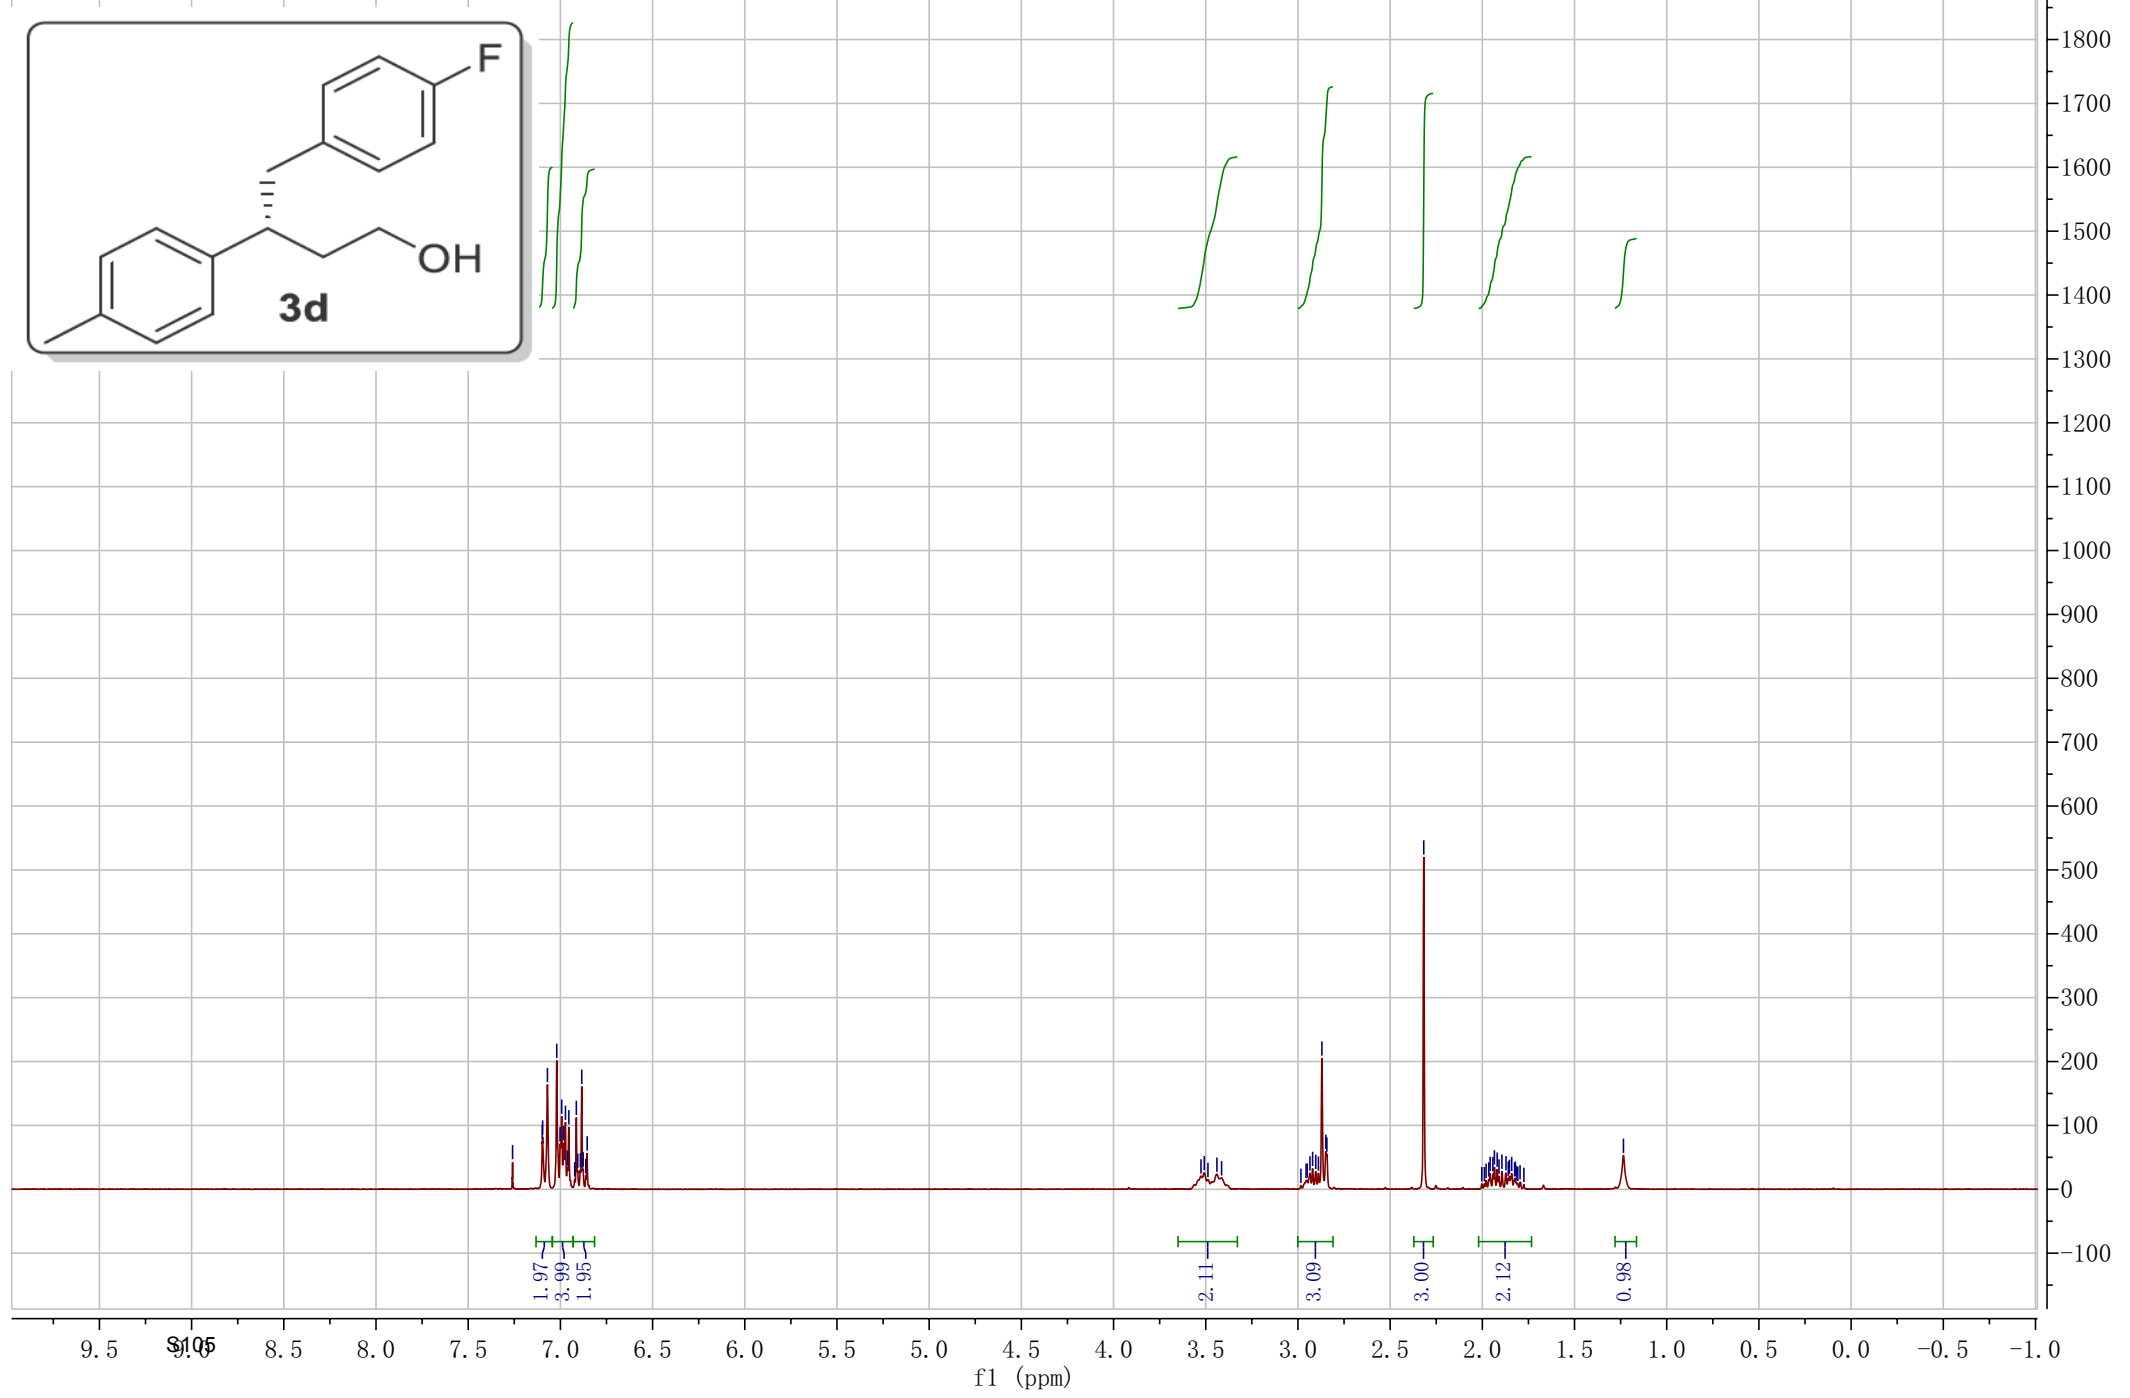

zhimin-czm272-OH-300-C  
13C OBSERVE

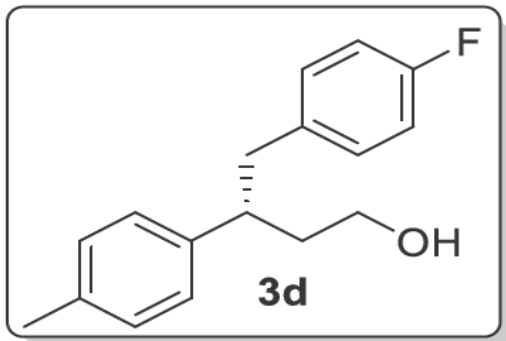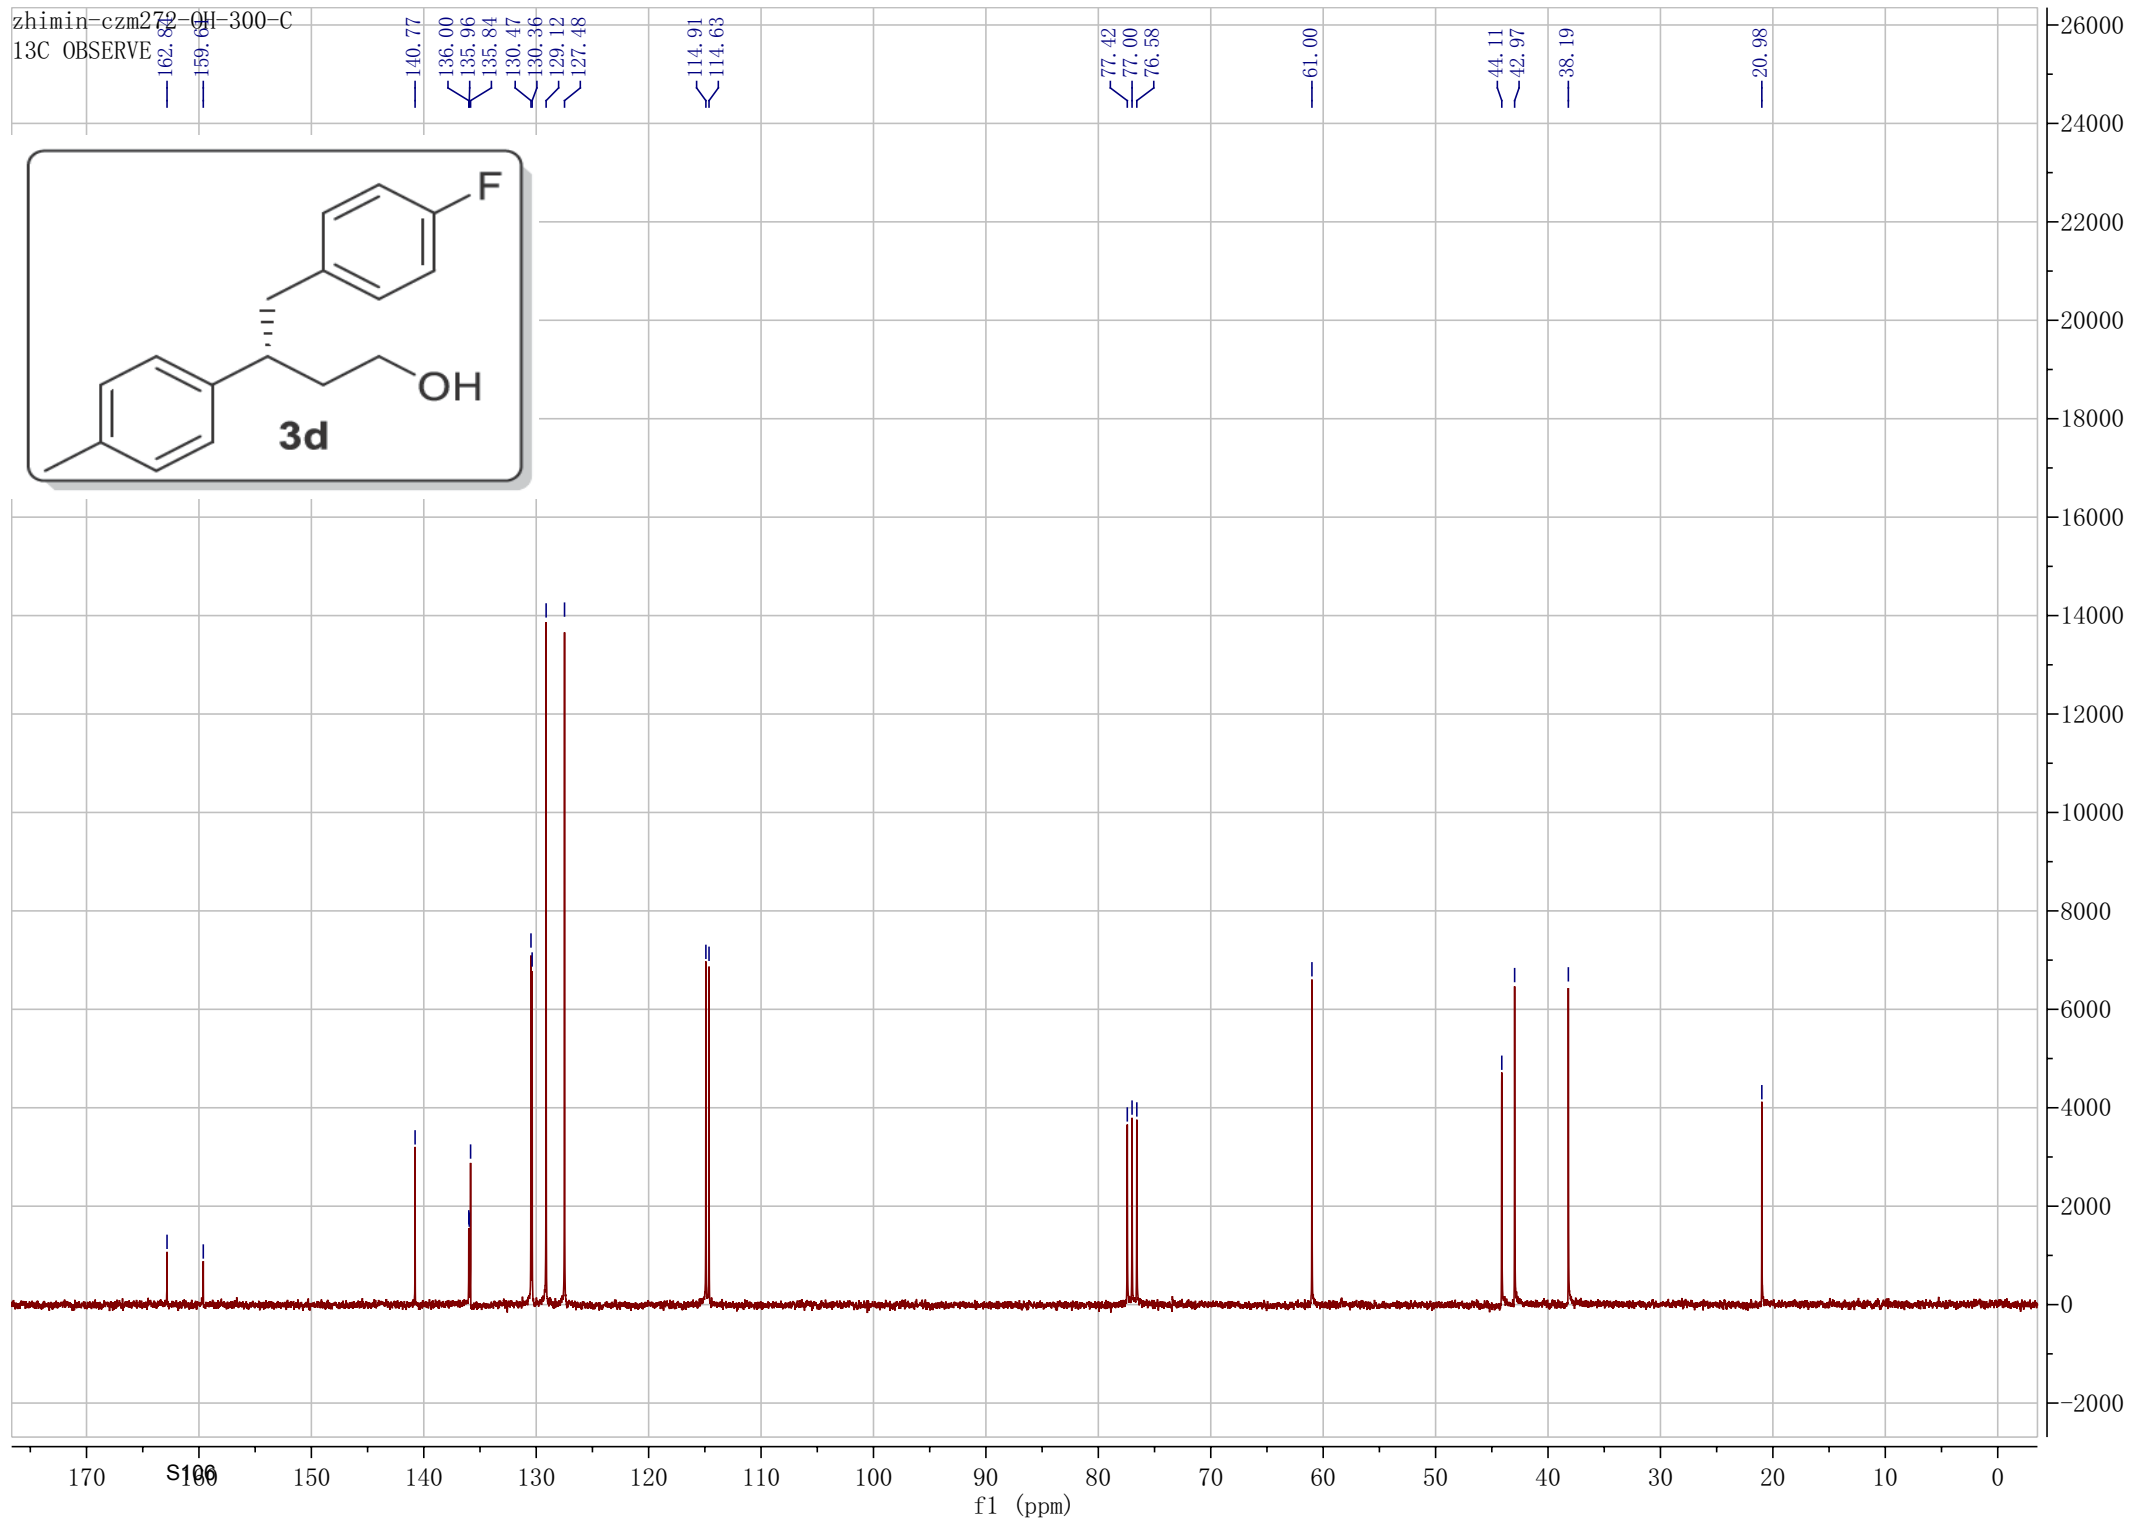



zhimin-czm272-OH-300-F

19F OBSERVE

STANDARD PARAMETERS

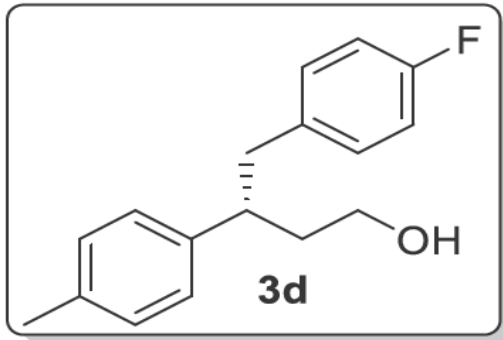

117.96  
117.98  
117.99  
118.01  
118.02  
118.04  
118.06

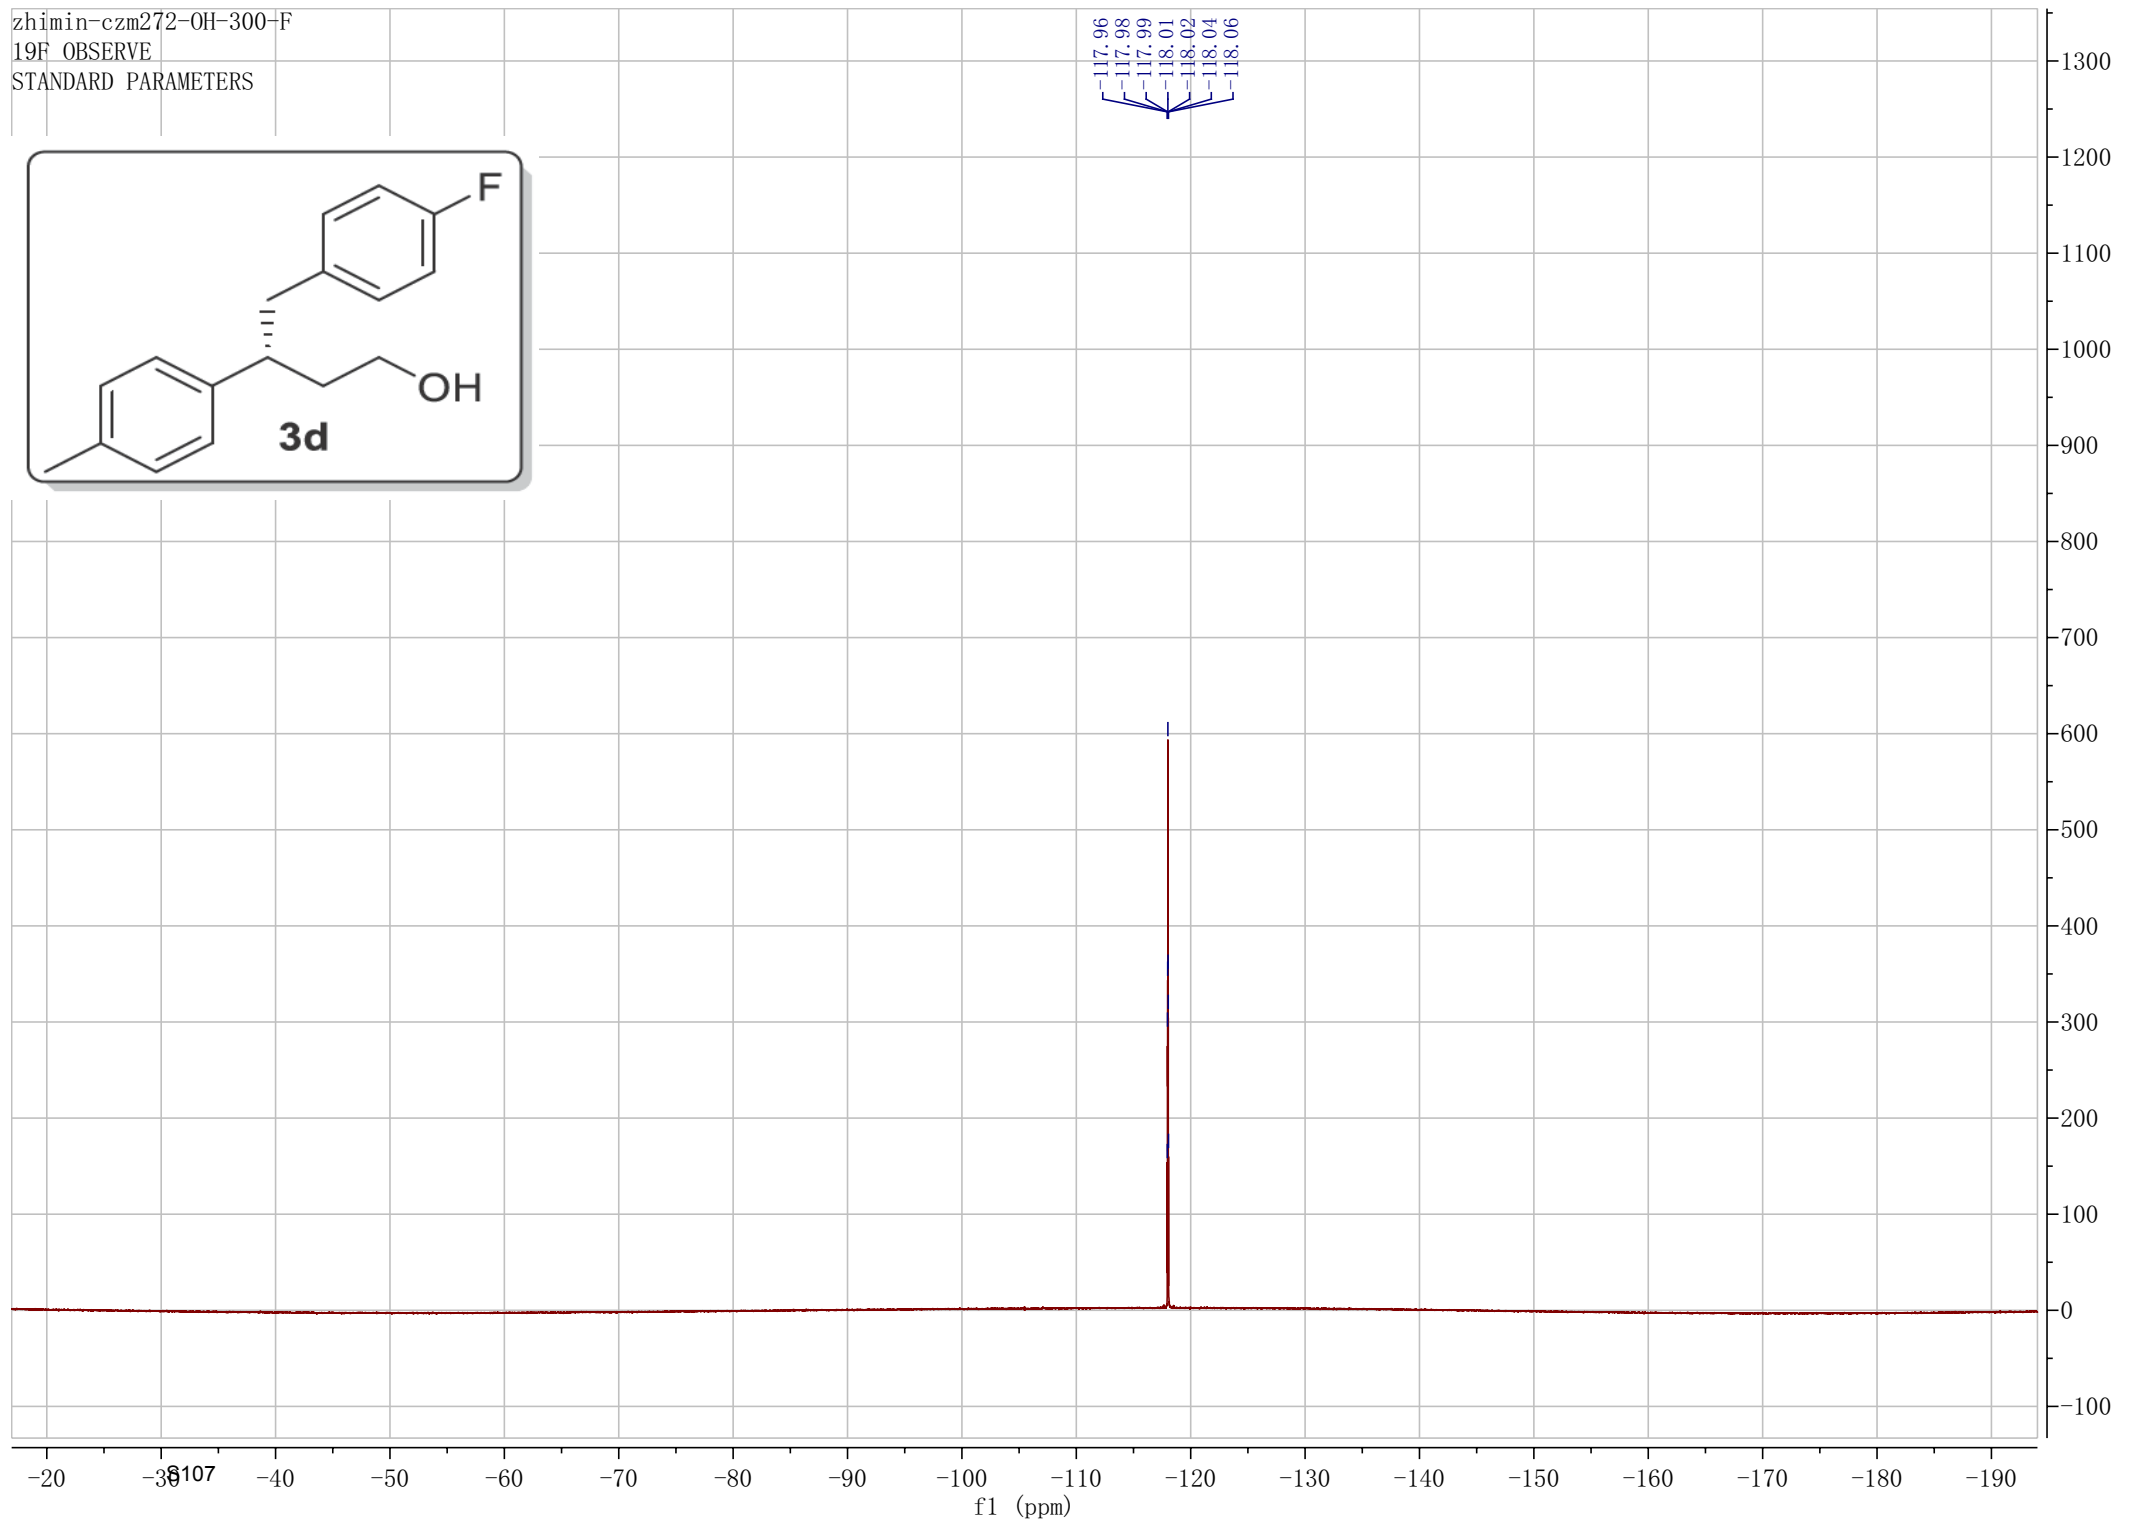

zhimin-czm136-CHO-H  
STANDARD PROTON PARAMETERS

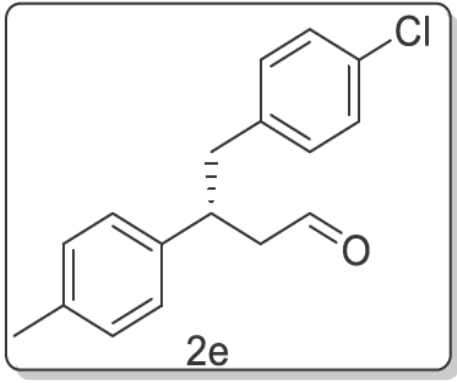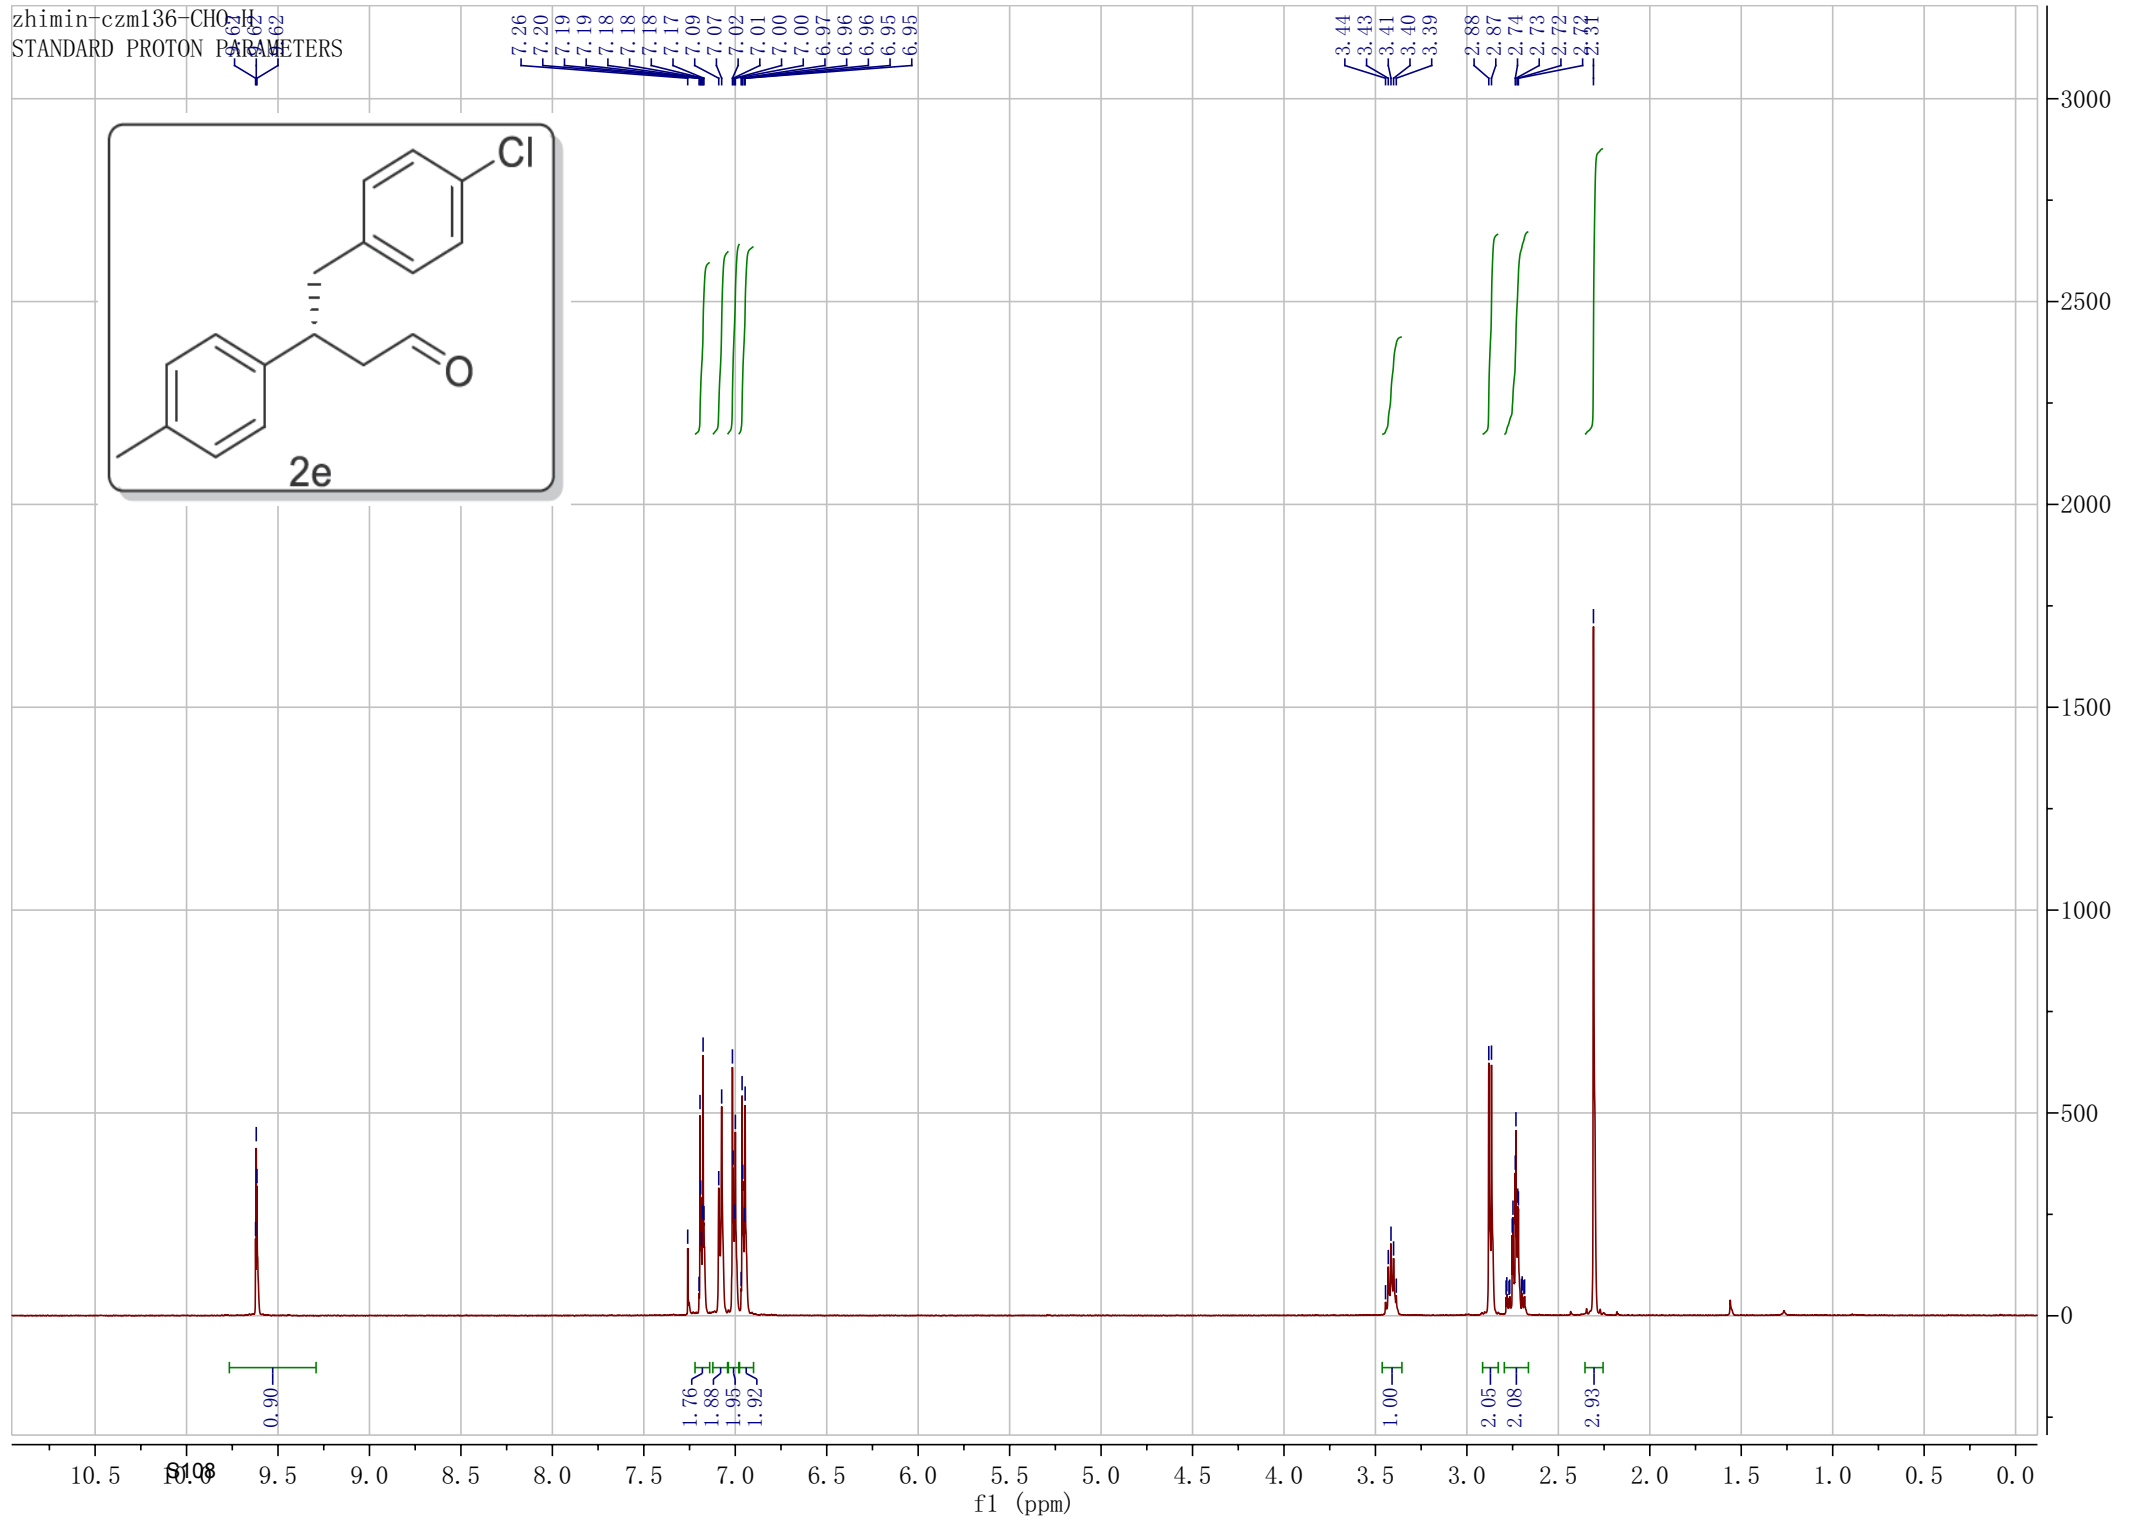

zhimig\_czm136-CHO-C  
STANDARD CARBON PARAMETERS

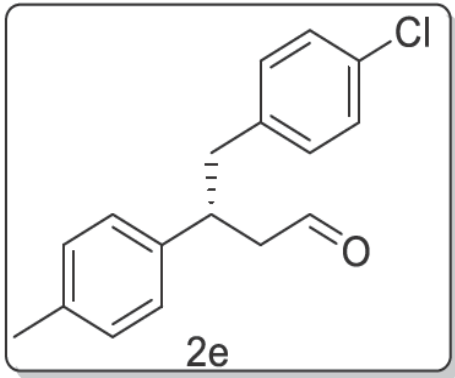

139.59  
137.82  
136.38  
132.03  
130.50  
129.30  
128.35  
127.34

77.26  
77.00  
76.75

49.12

42.51  
41.43

20.99

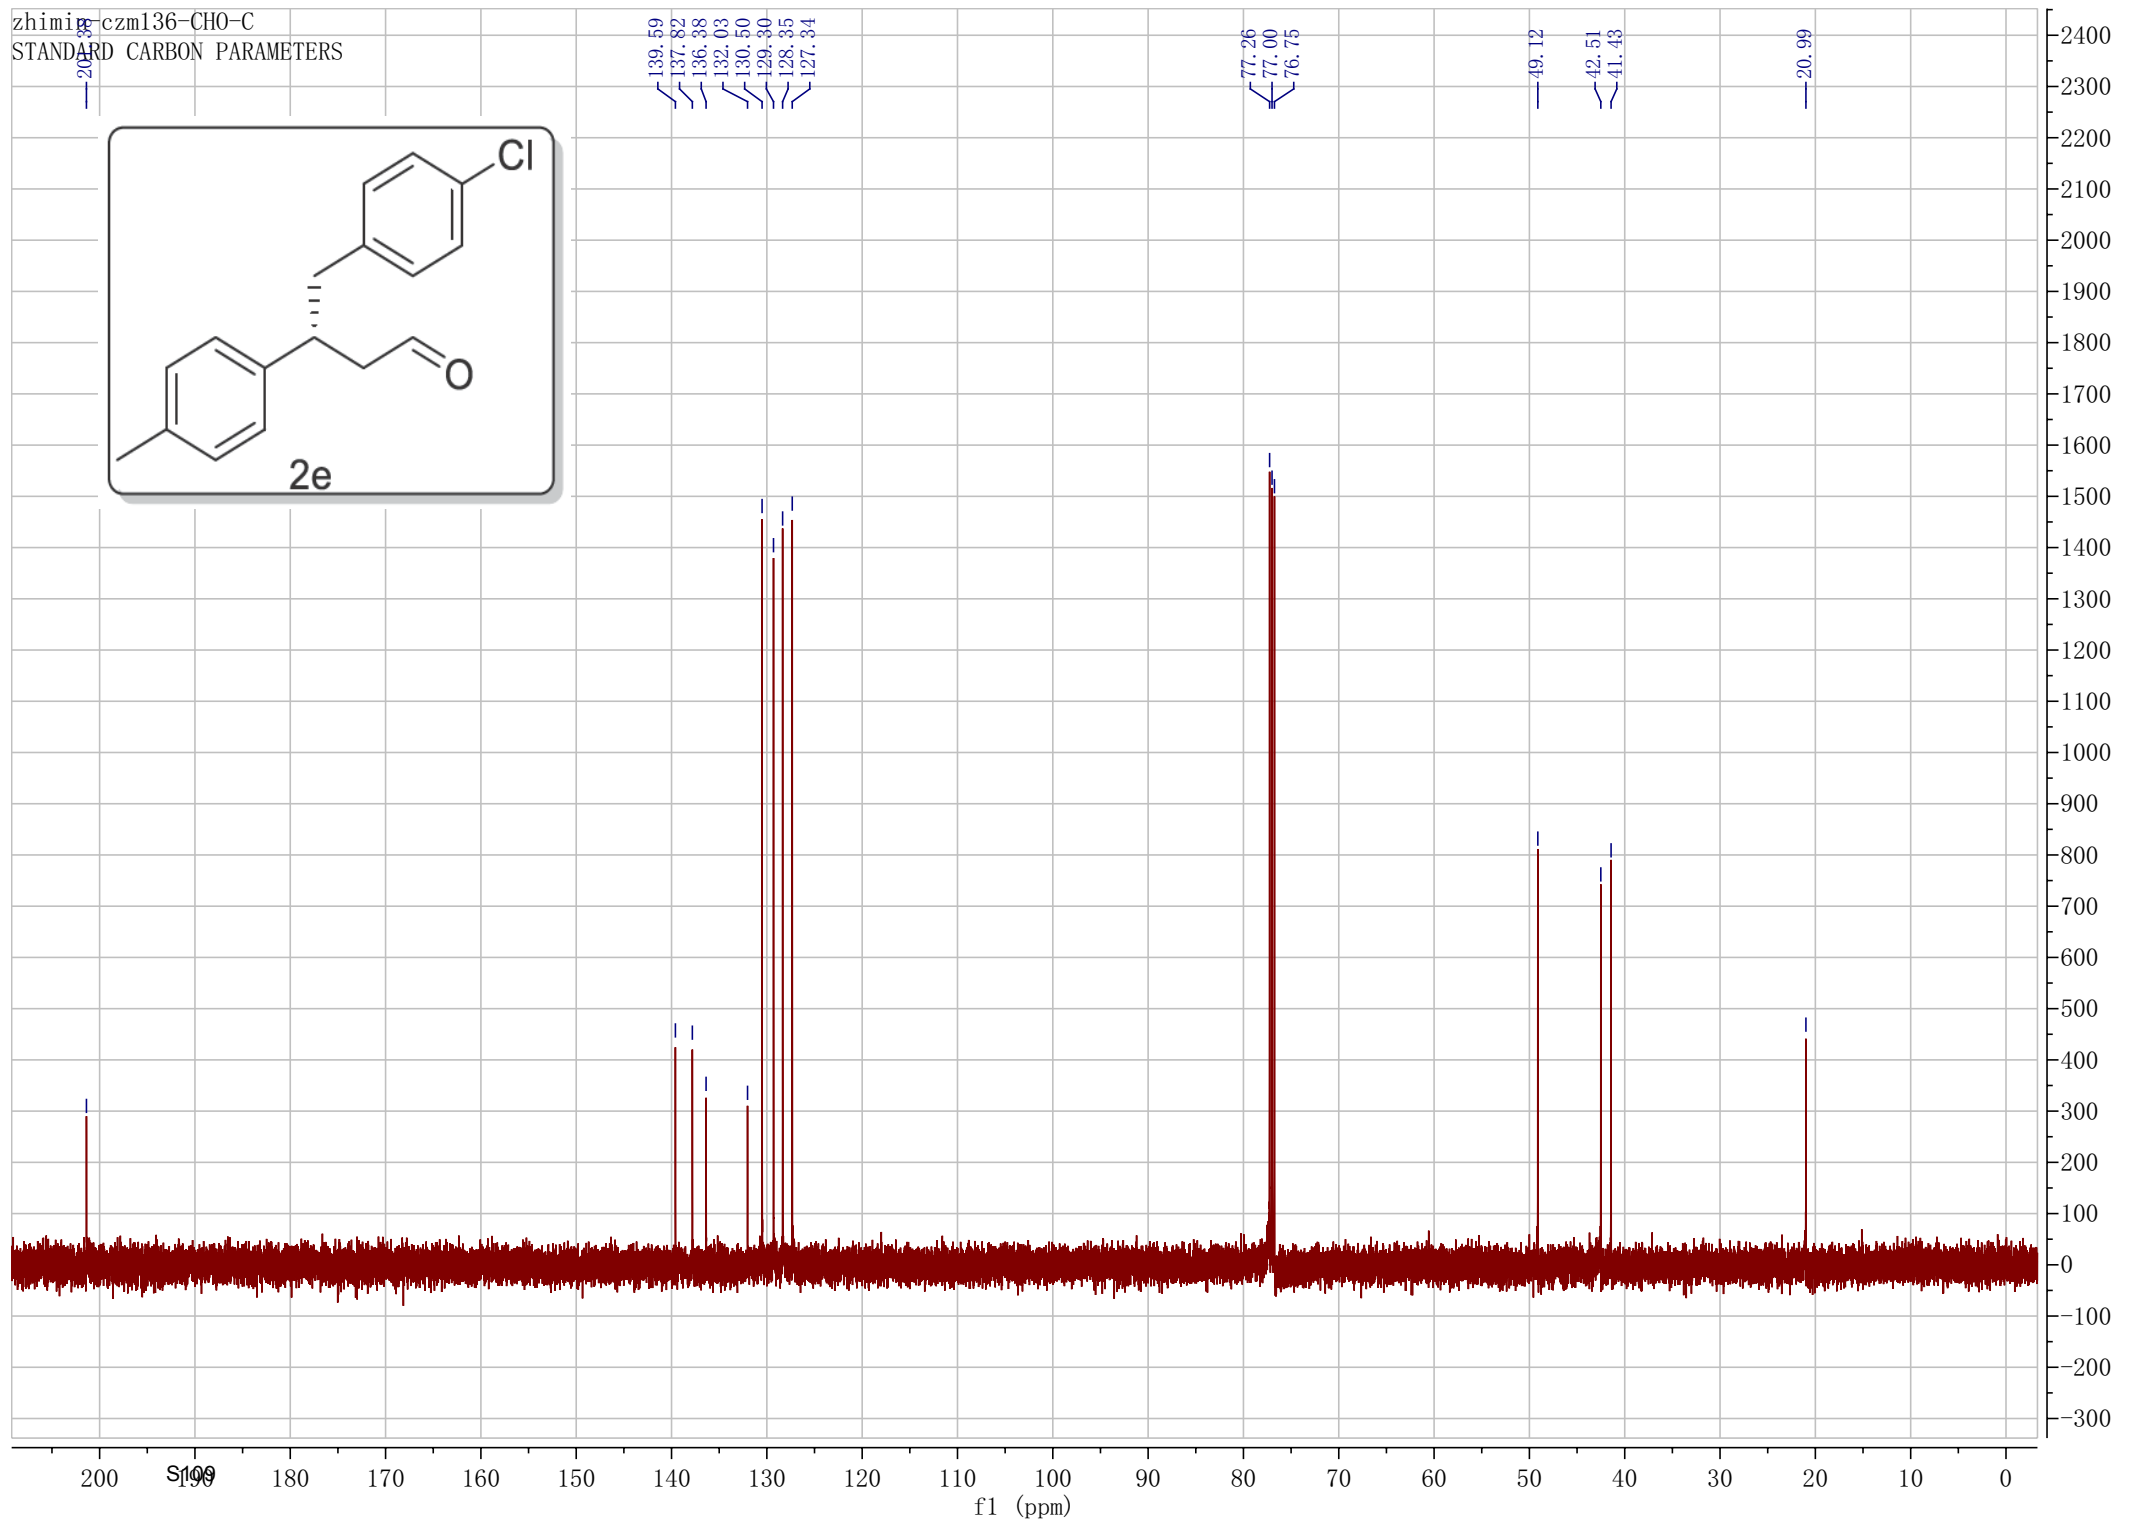

zhimin-czm261-OH-H  
STANDARD PROTON PARAMETERS

7.26  
7.17  
7.16  
7.16  
7.15  
7.14  
7.08  
7.06  
7.00  
6.99  
6.96  
6.95  
6.94

3.55  
3.53  
3.53  
3.52  
3.52  
3.51  
3.51  
3.50  
3.49  
3.47  
3.45  
3.43  
3.43  
3.43  
3.42  
3.41  
3.41  
3.40

2.92  
2.92  
2.91  
2.90  
2.86  
2.84

1.93  
1.92  
1.92  
1.91  
1.90  
1.84  
1.83  
1.83  
1.83  
1.83

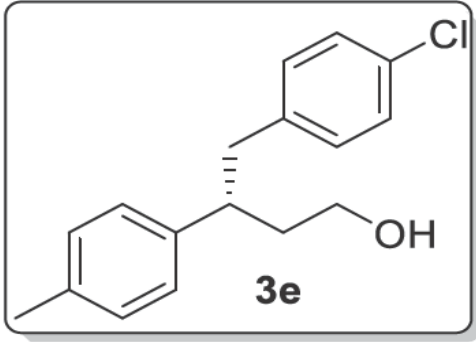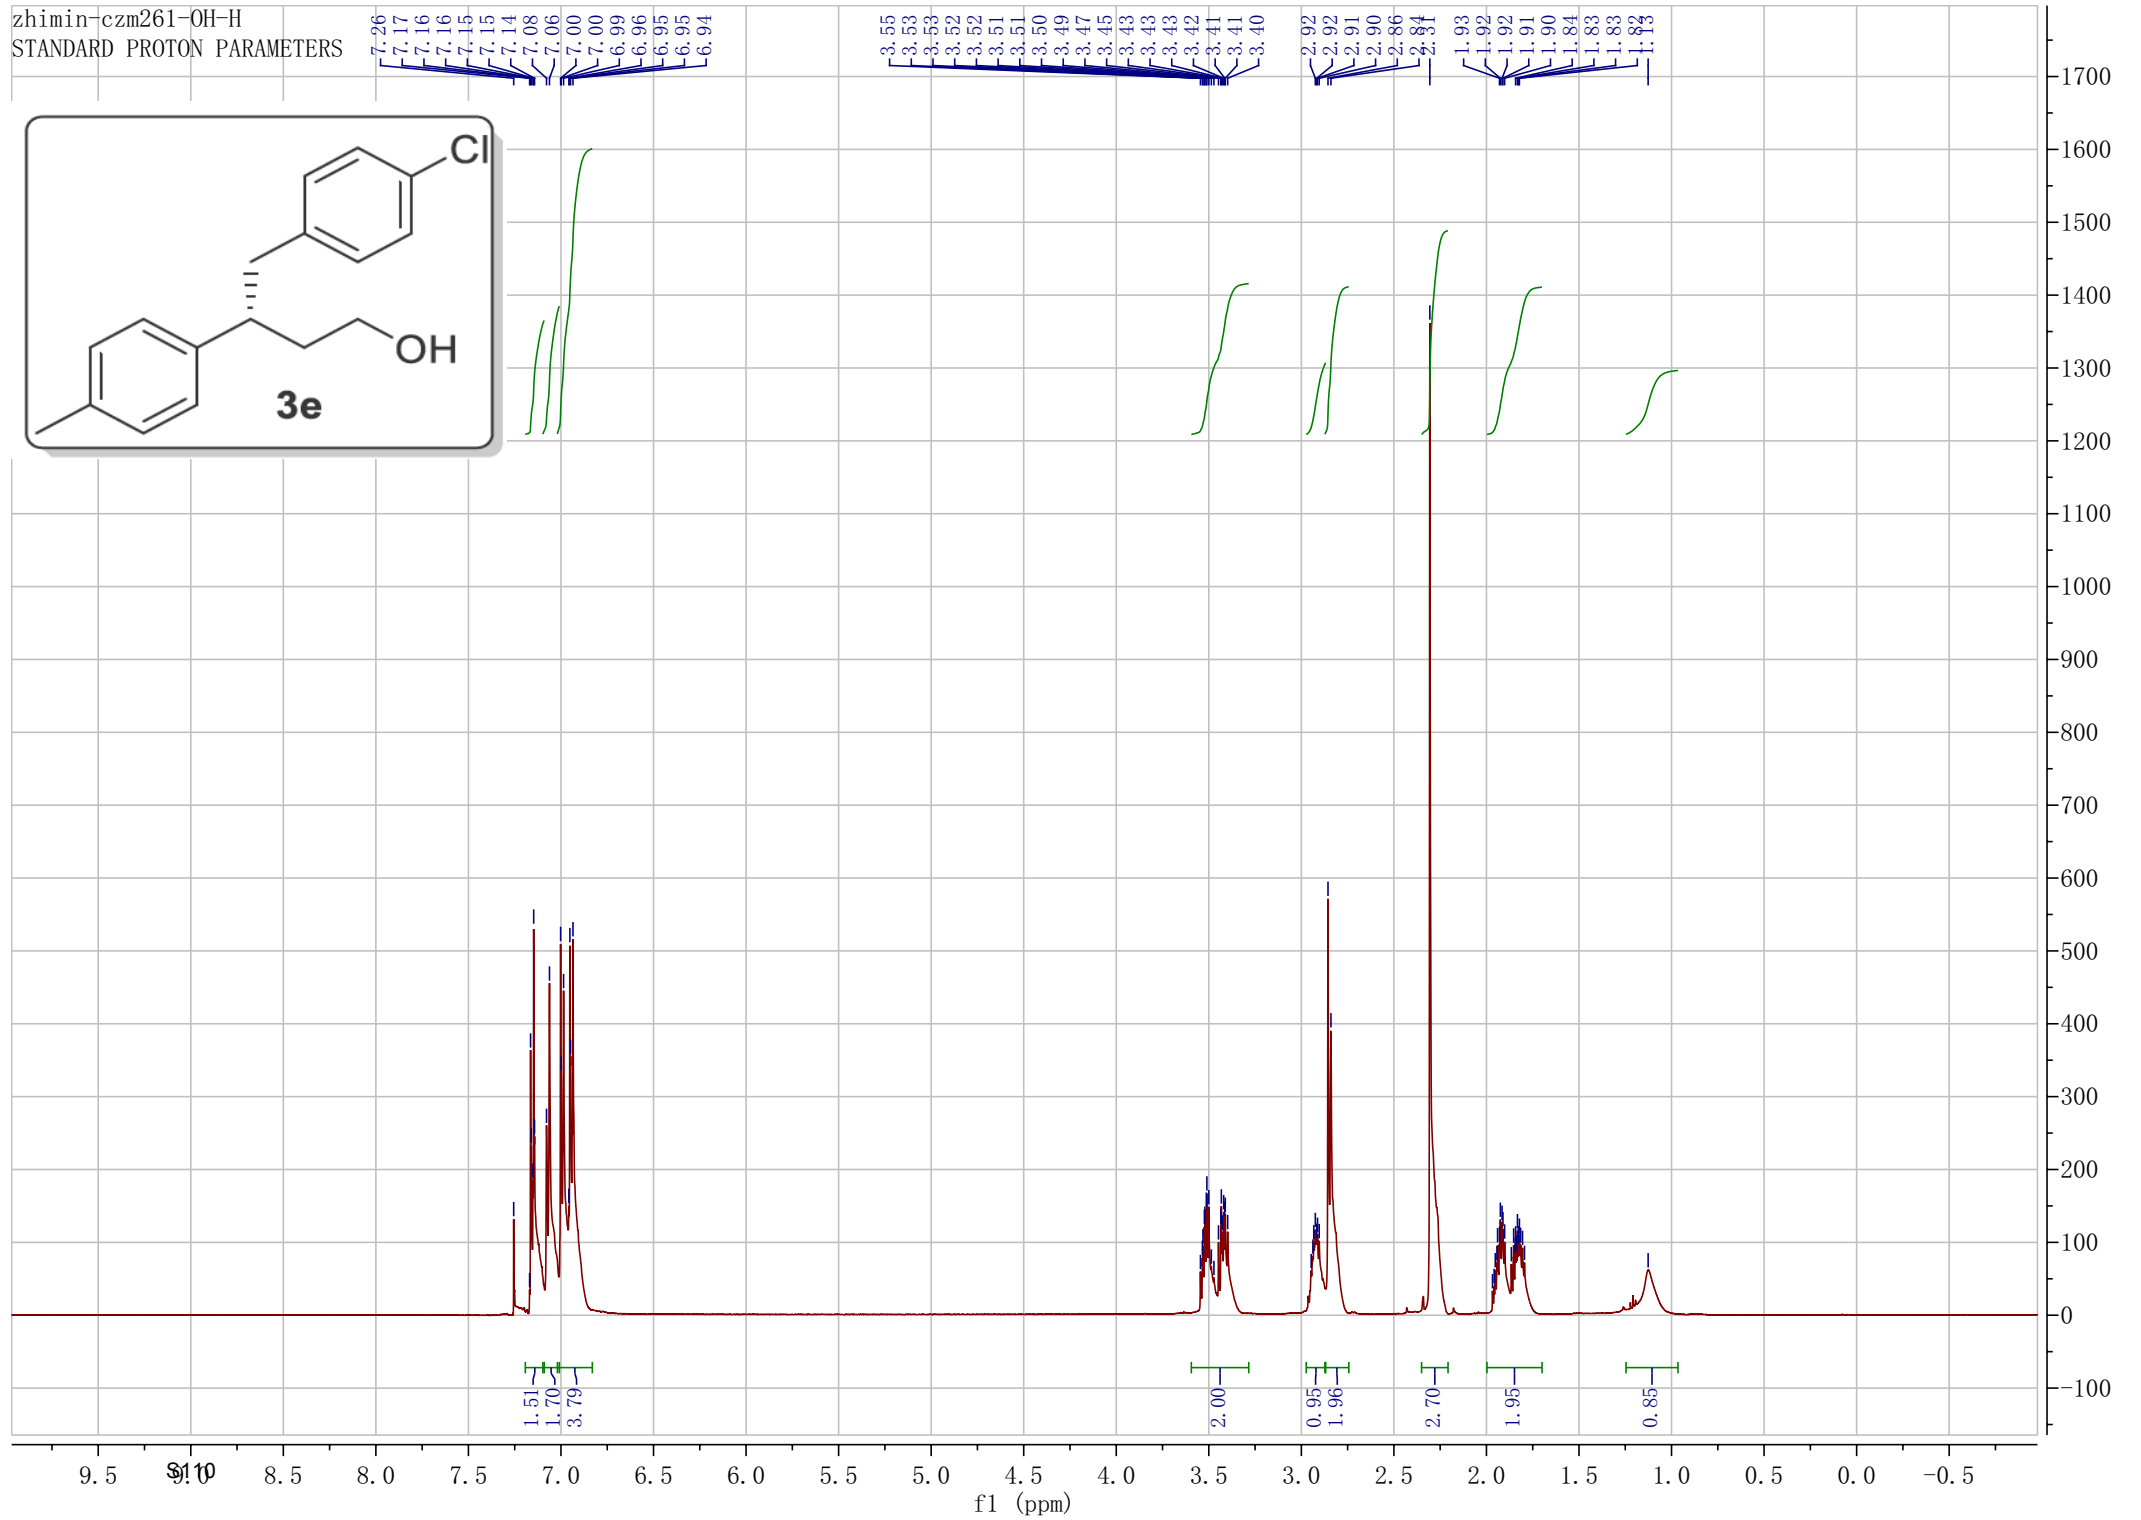

zhimin-czm261-OH-C  
STANDARD CARBON PARAMETERS

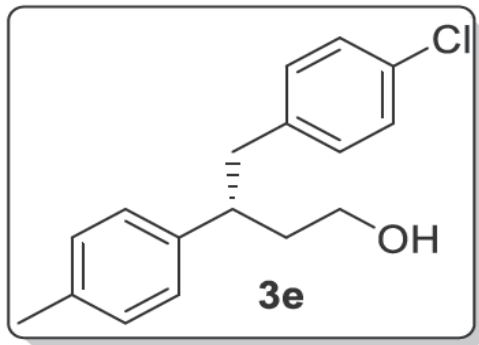

140.63  
138.82  
135.93  
131.58  
130.45  
129.17  
128.16  
127.49

77.25  
77.00  
76.75

61.00

43.96  
43.13  
38.30

21.00

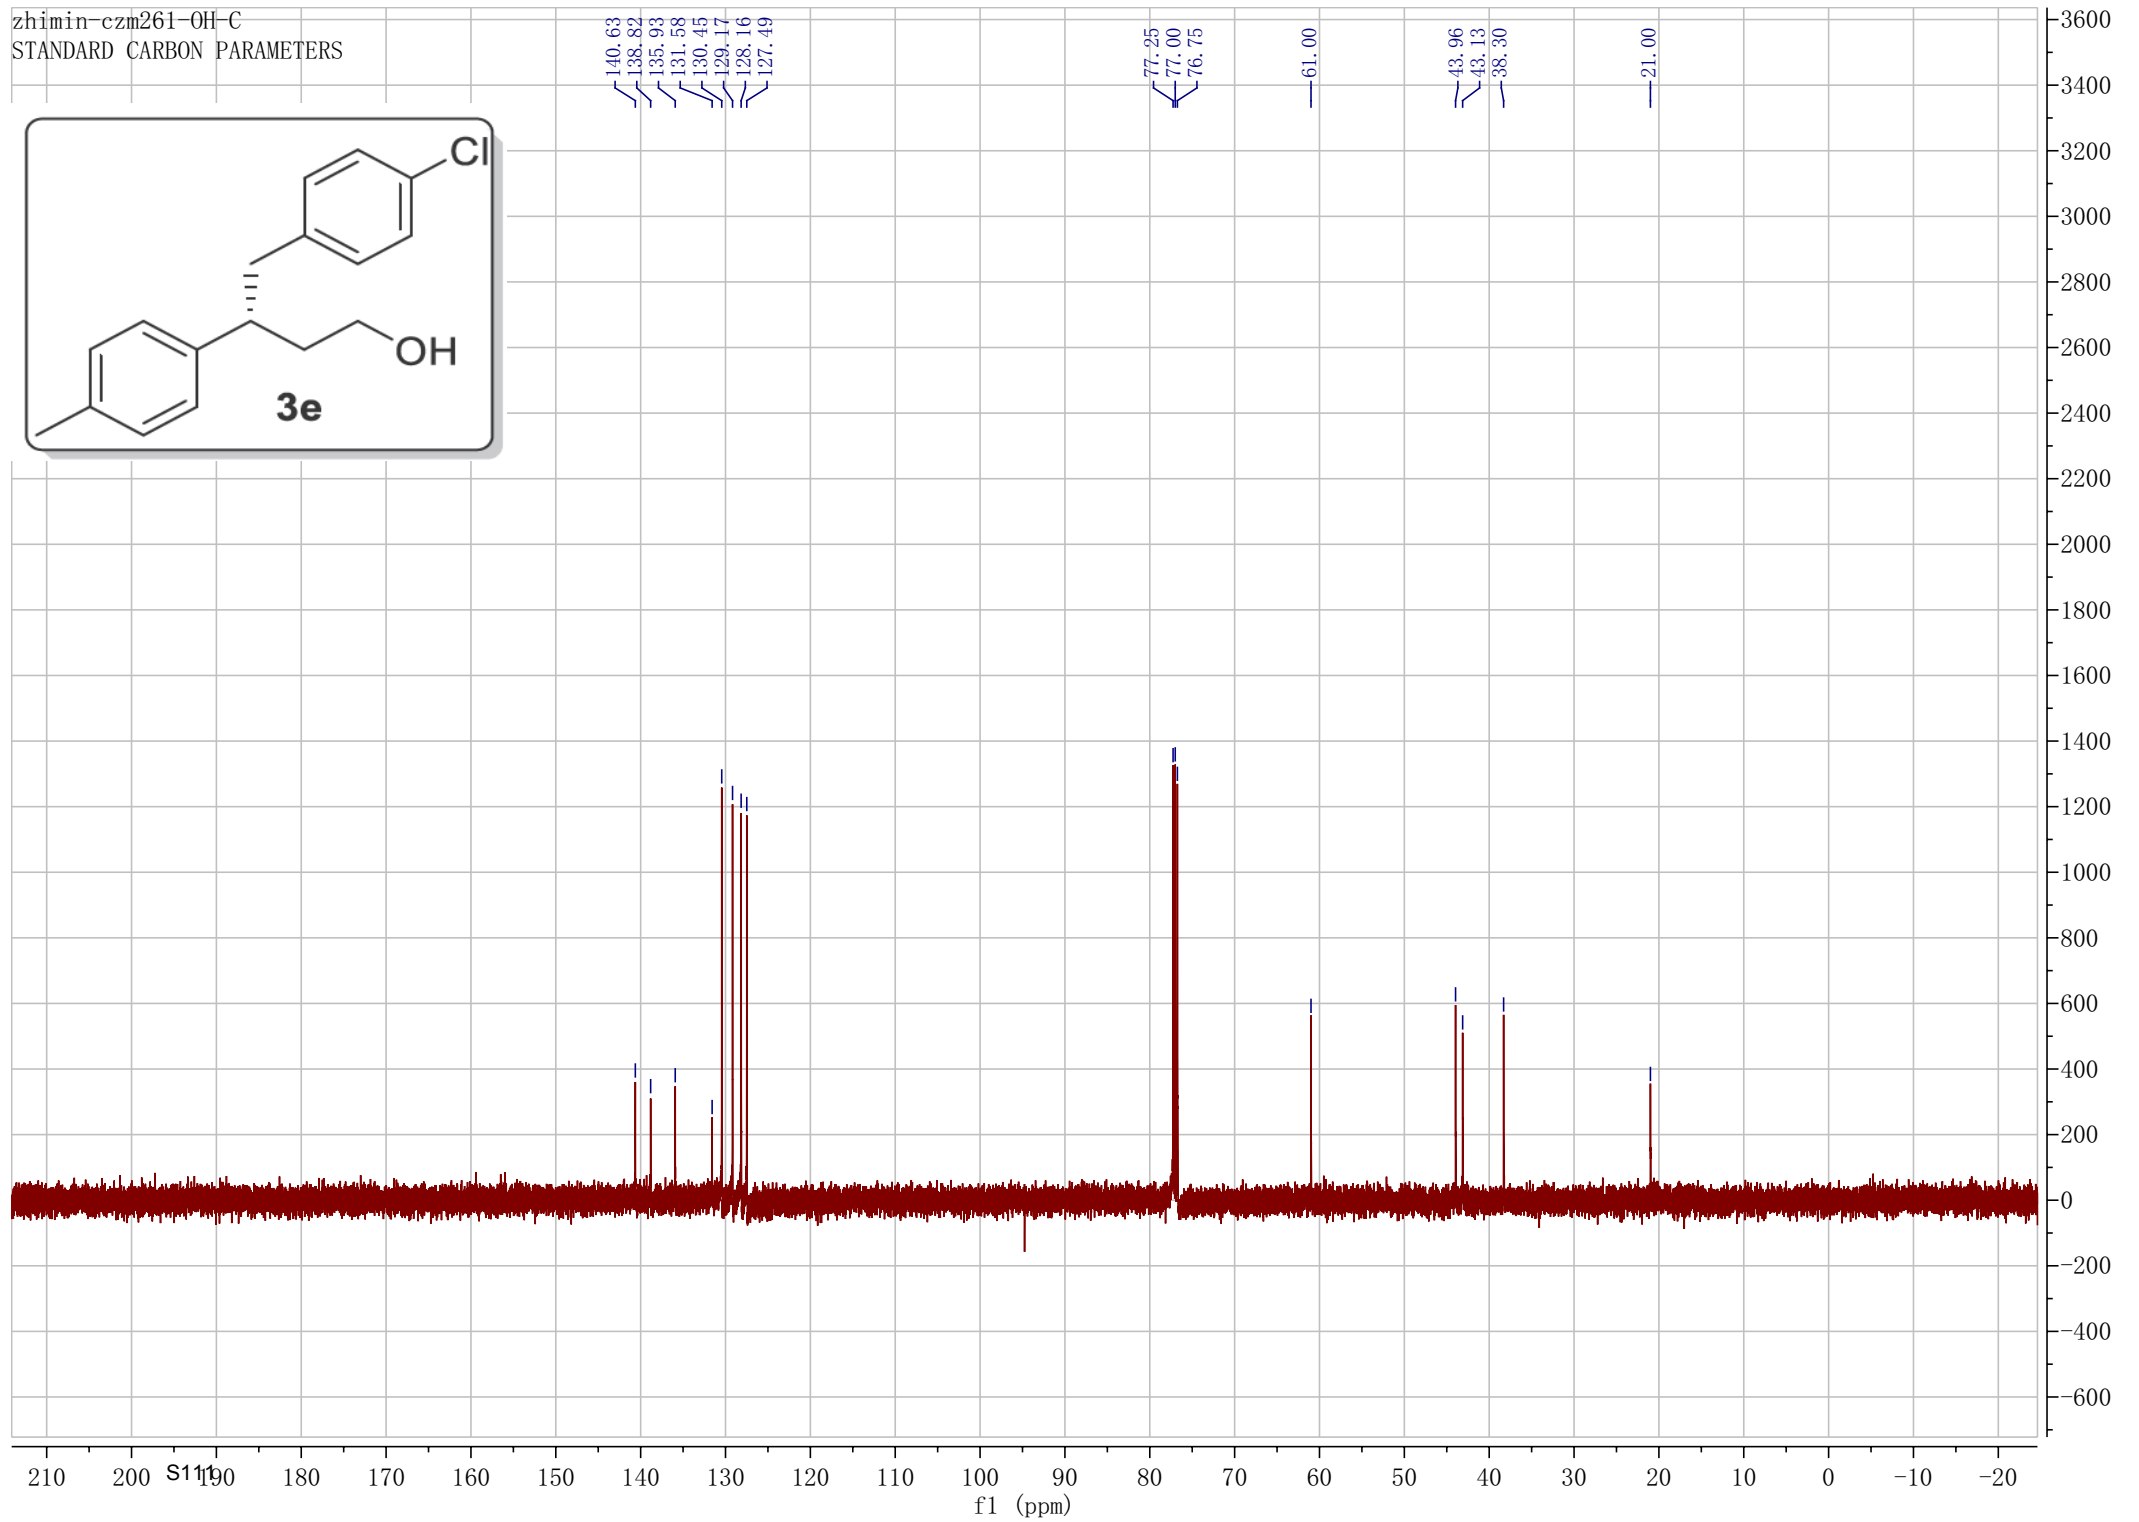

zhimin-czm273-CHO-500-H  
STANDARD PROTON PARAMETERS

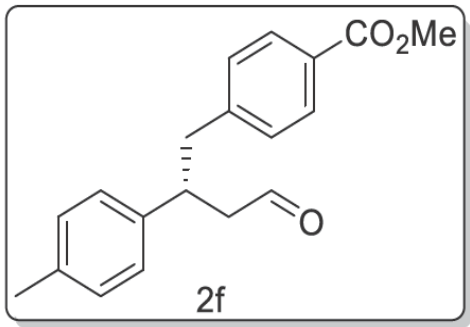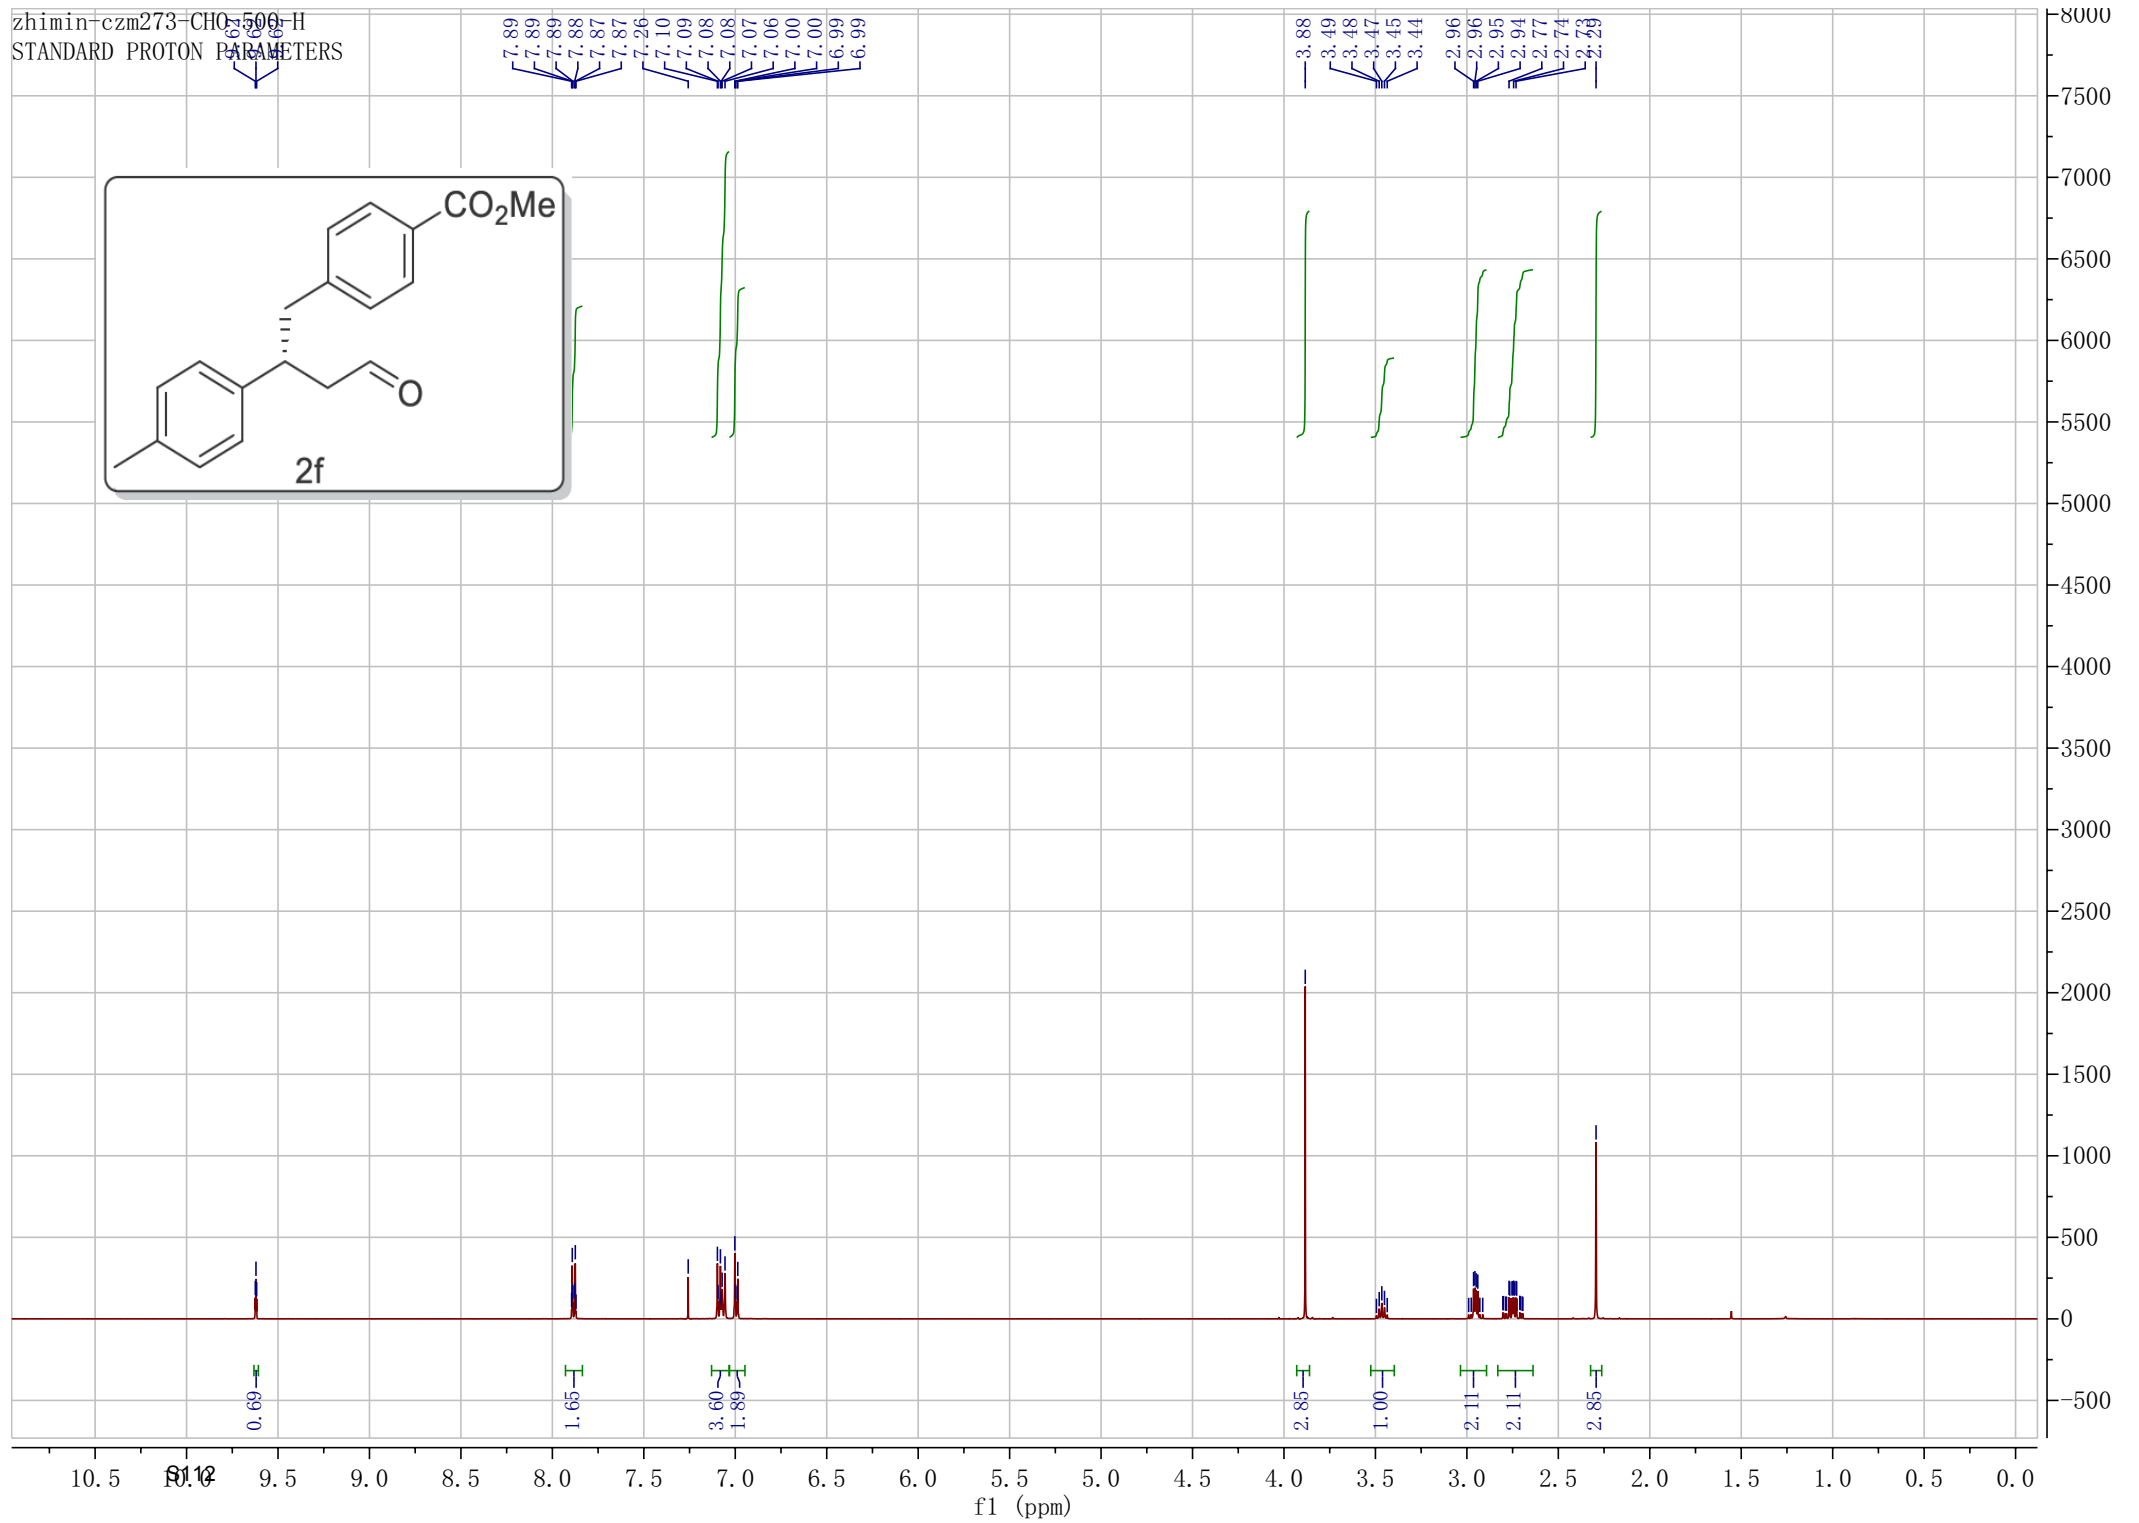

zhimj-czm273-CHO-300-C  
13C OBSERVE

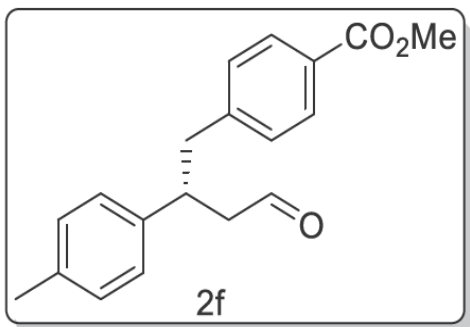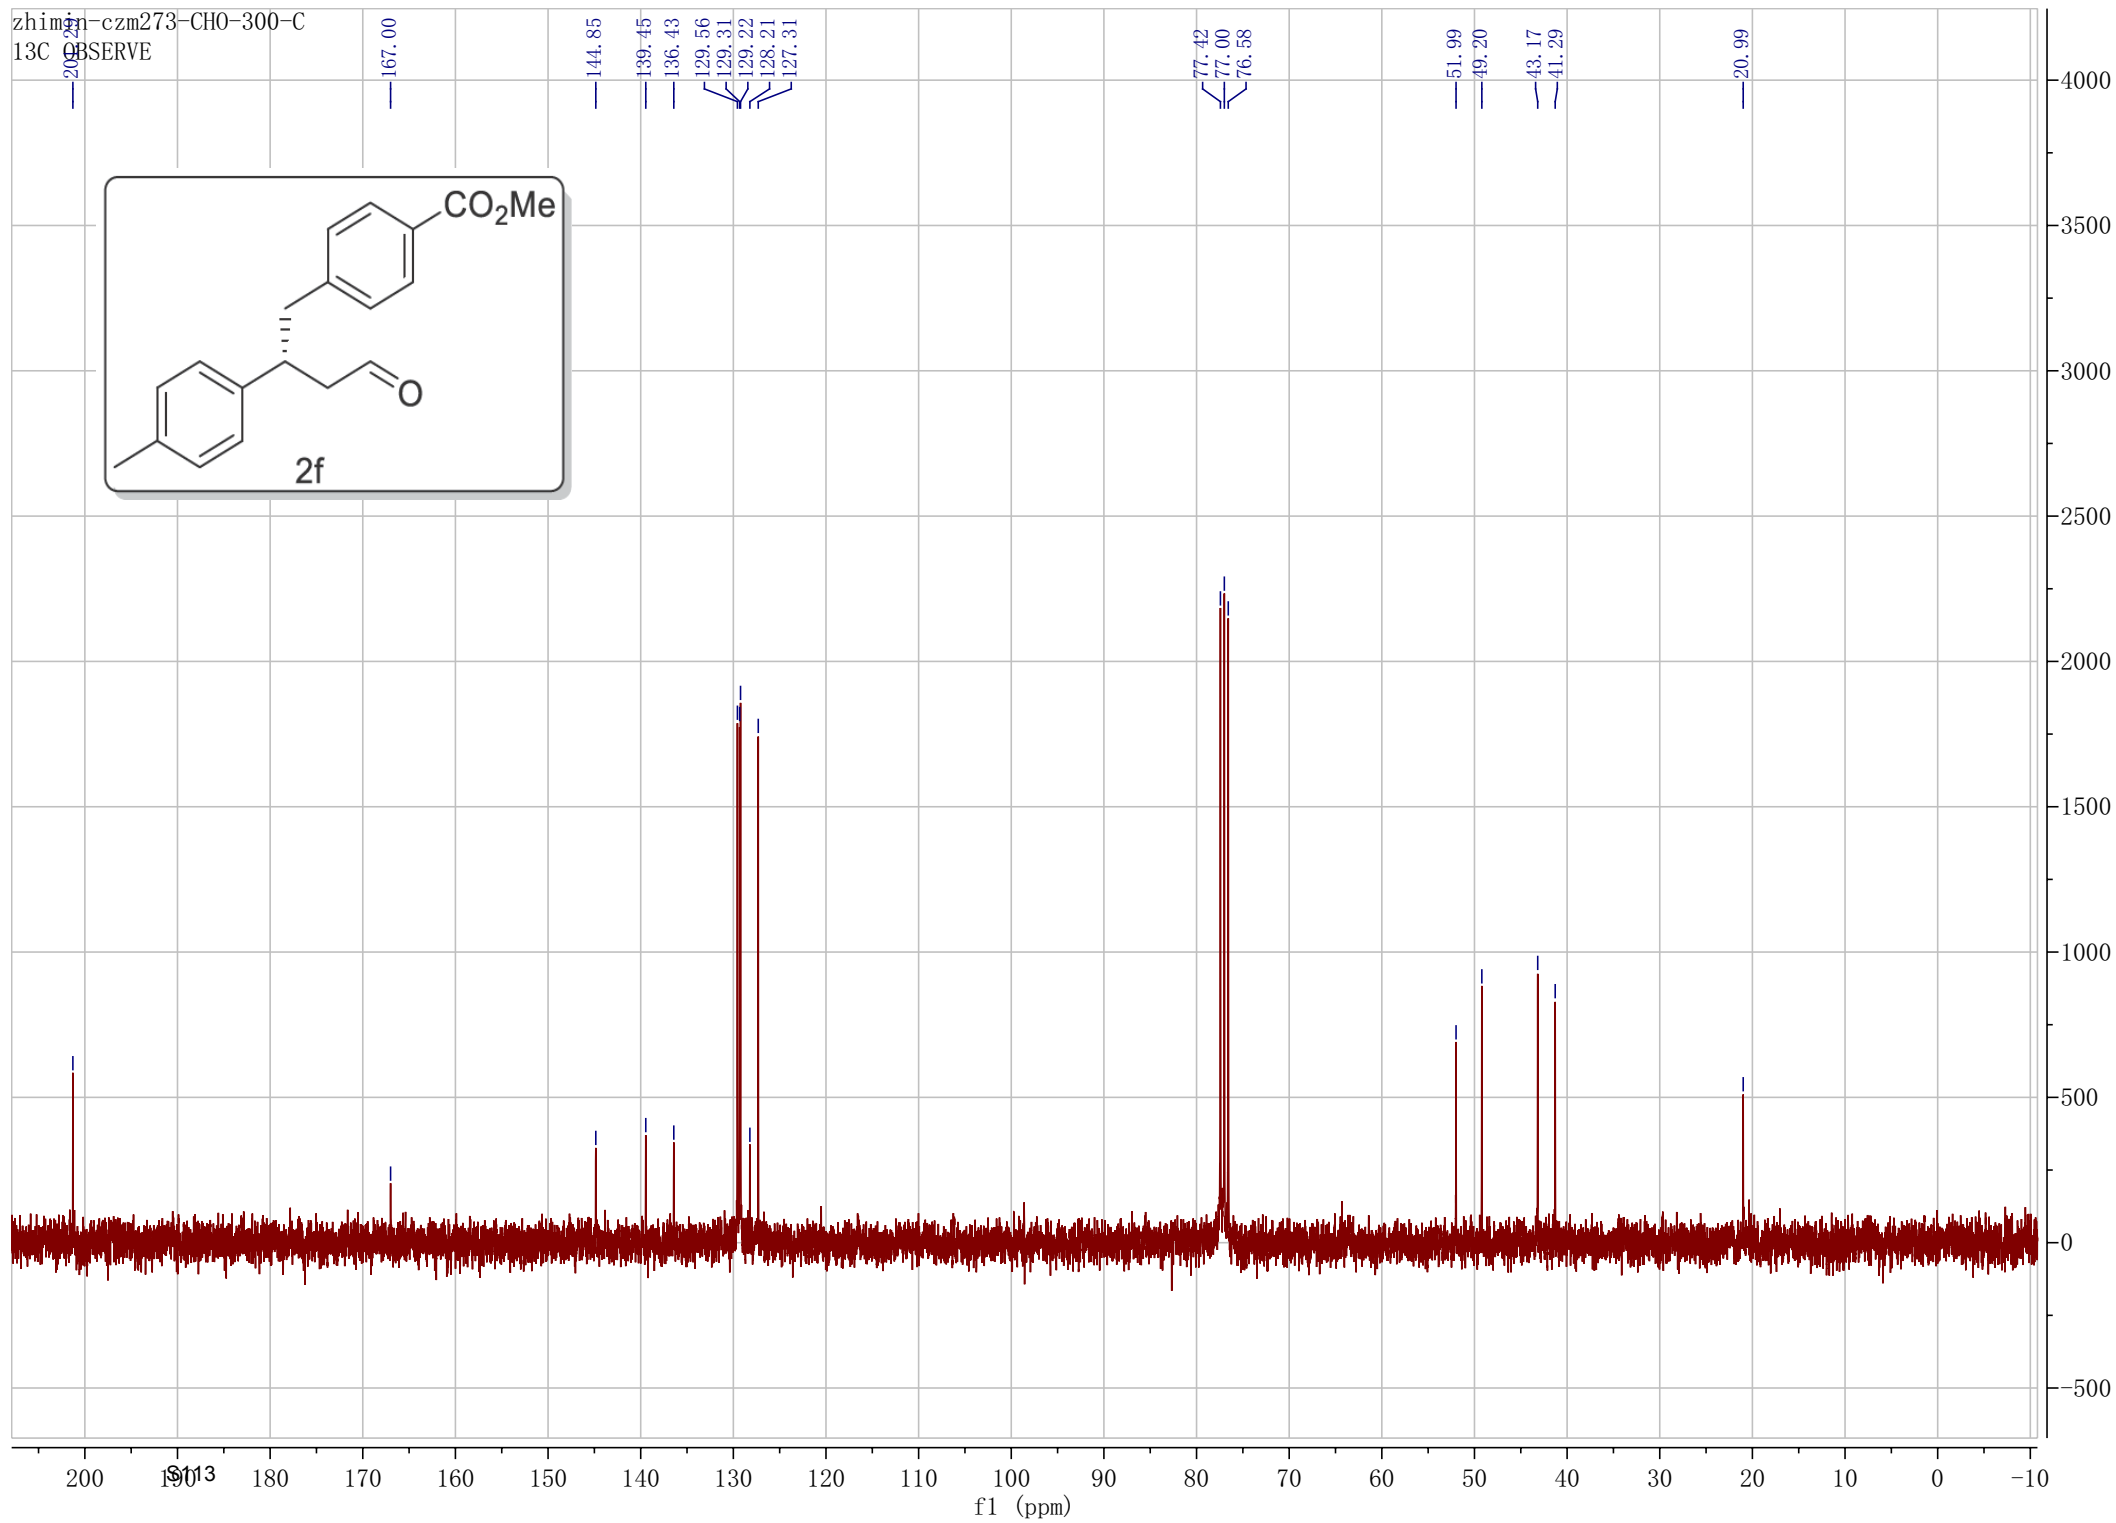

zhimin 2023-01-01 500-H  
STANDARD PROTON PARAMETERS

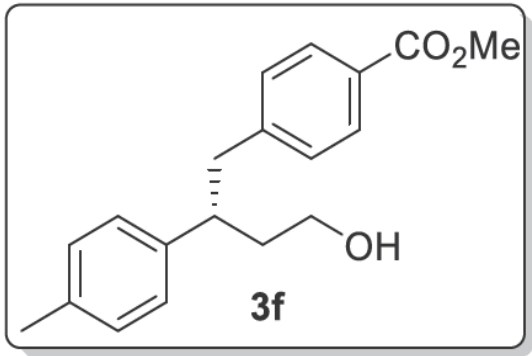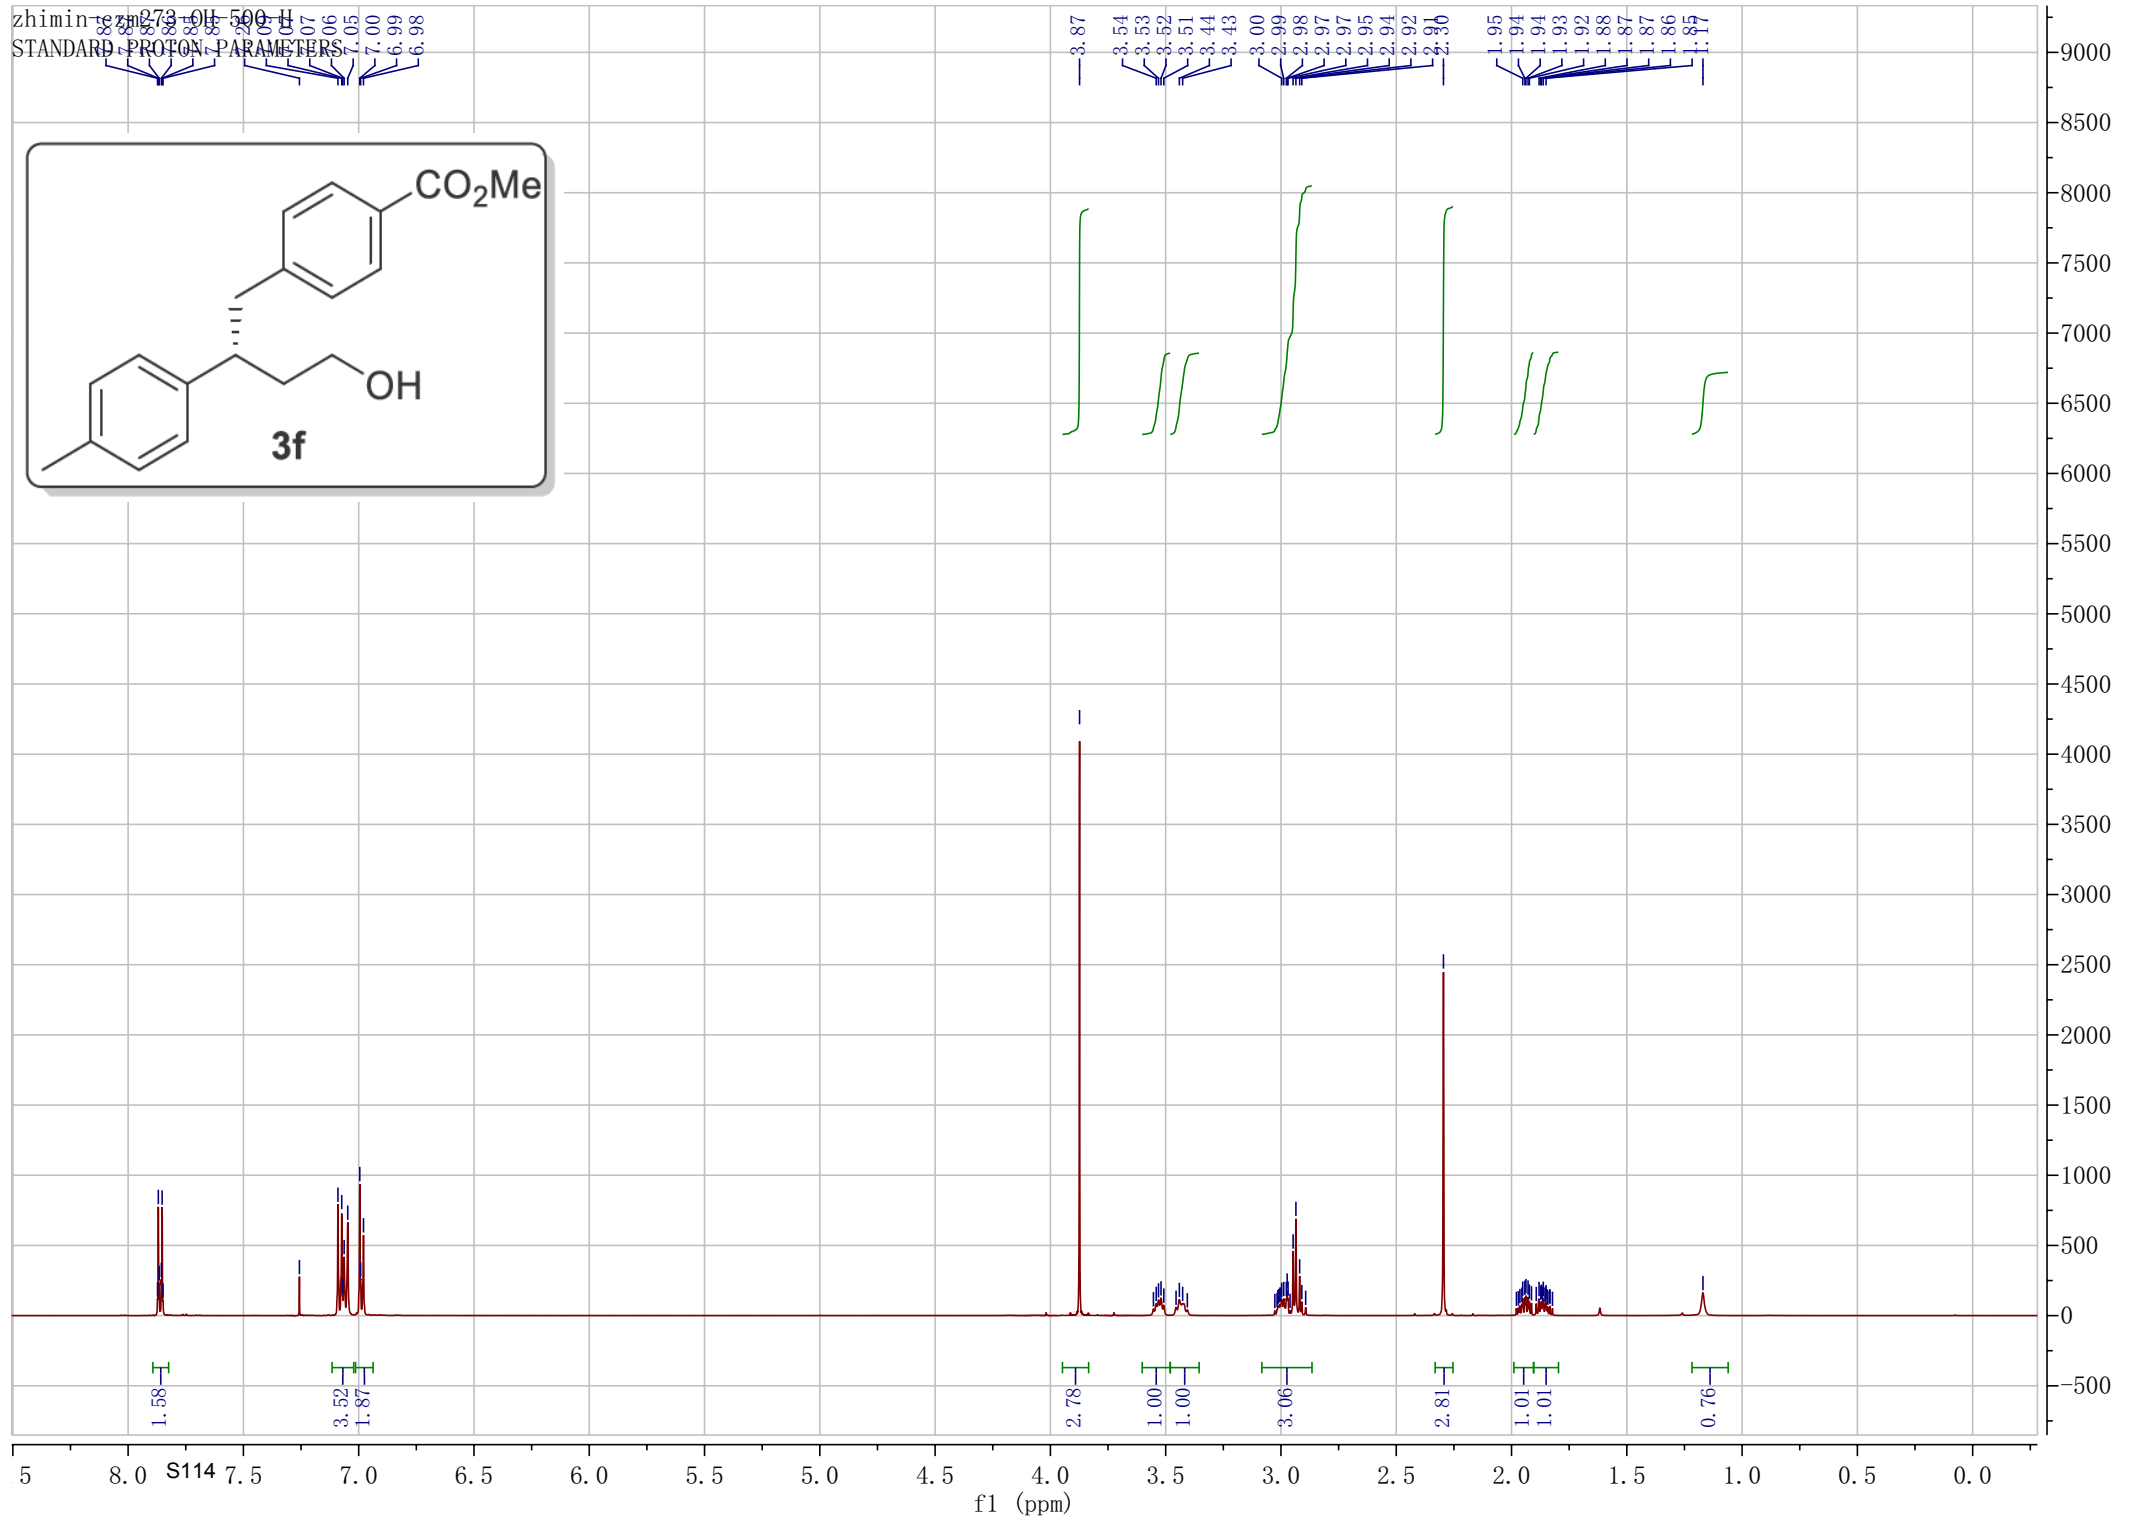



zhimin-czm273-OH-C-300  
13C OBSERVE

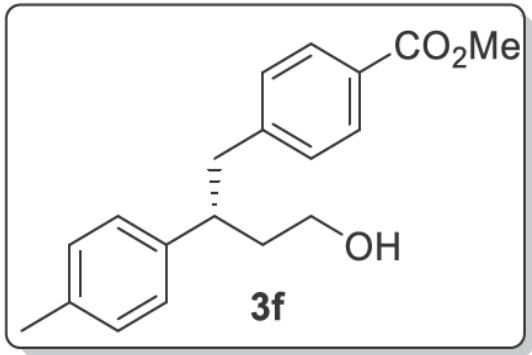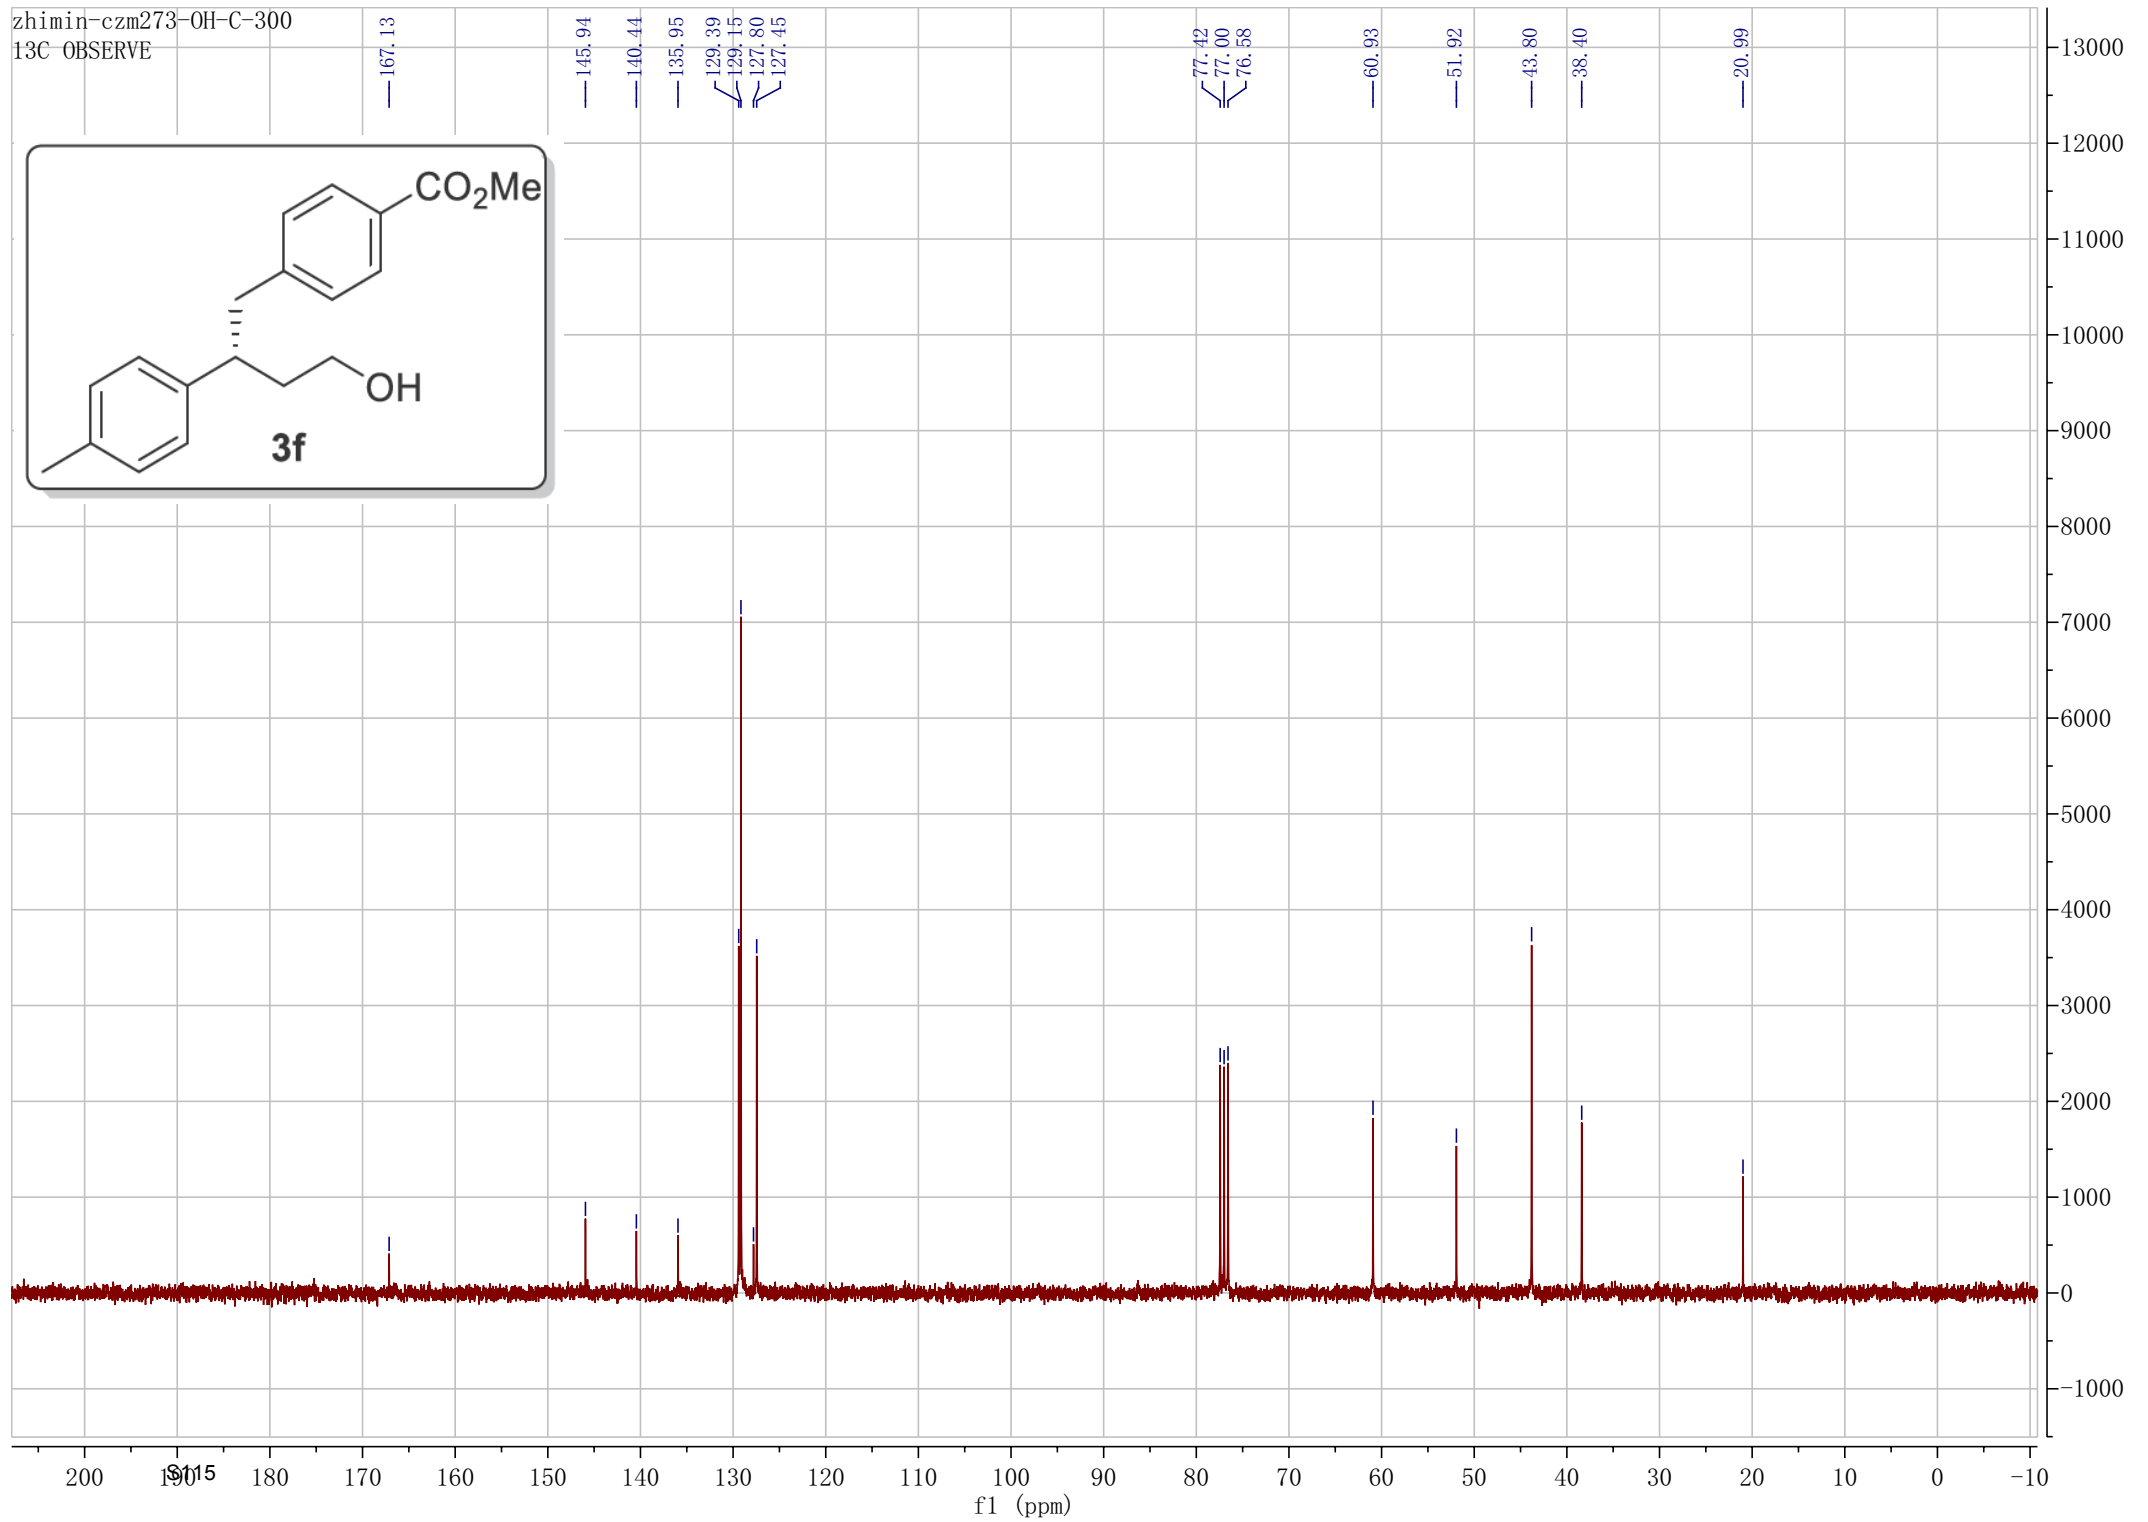

zhimin-czm283-CHO+H

STANDARD PROTON PARAMETERS

9.64  
9.64  
9.63

7.47  
7.46  
7.26  
7.14  
7.12  
7.09  
7.07  
7.02  
7.01  
7.00  
7.00

3.49  
3.47  
3.46  
3.45  
3.43  
2.97  
2.97  
2.96  
2.95  
2.78  
2.51

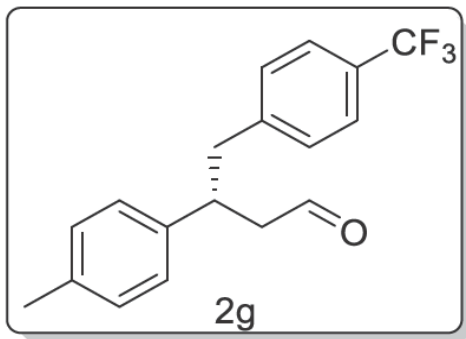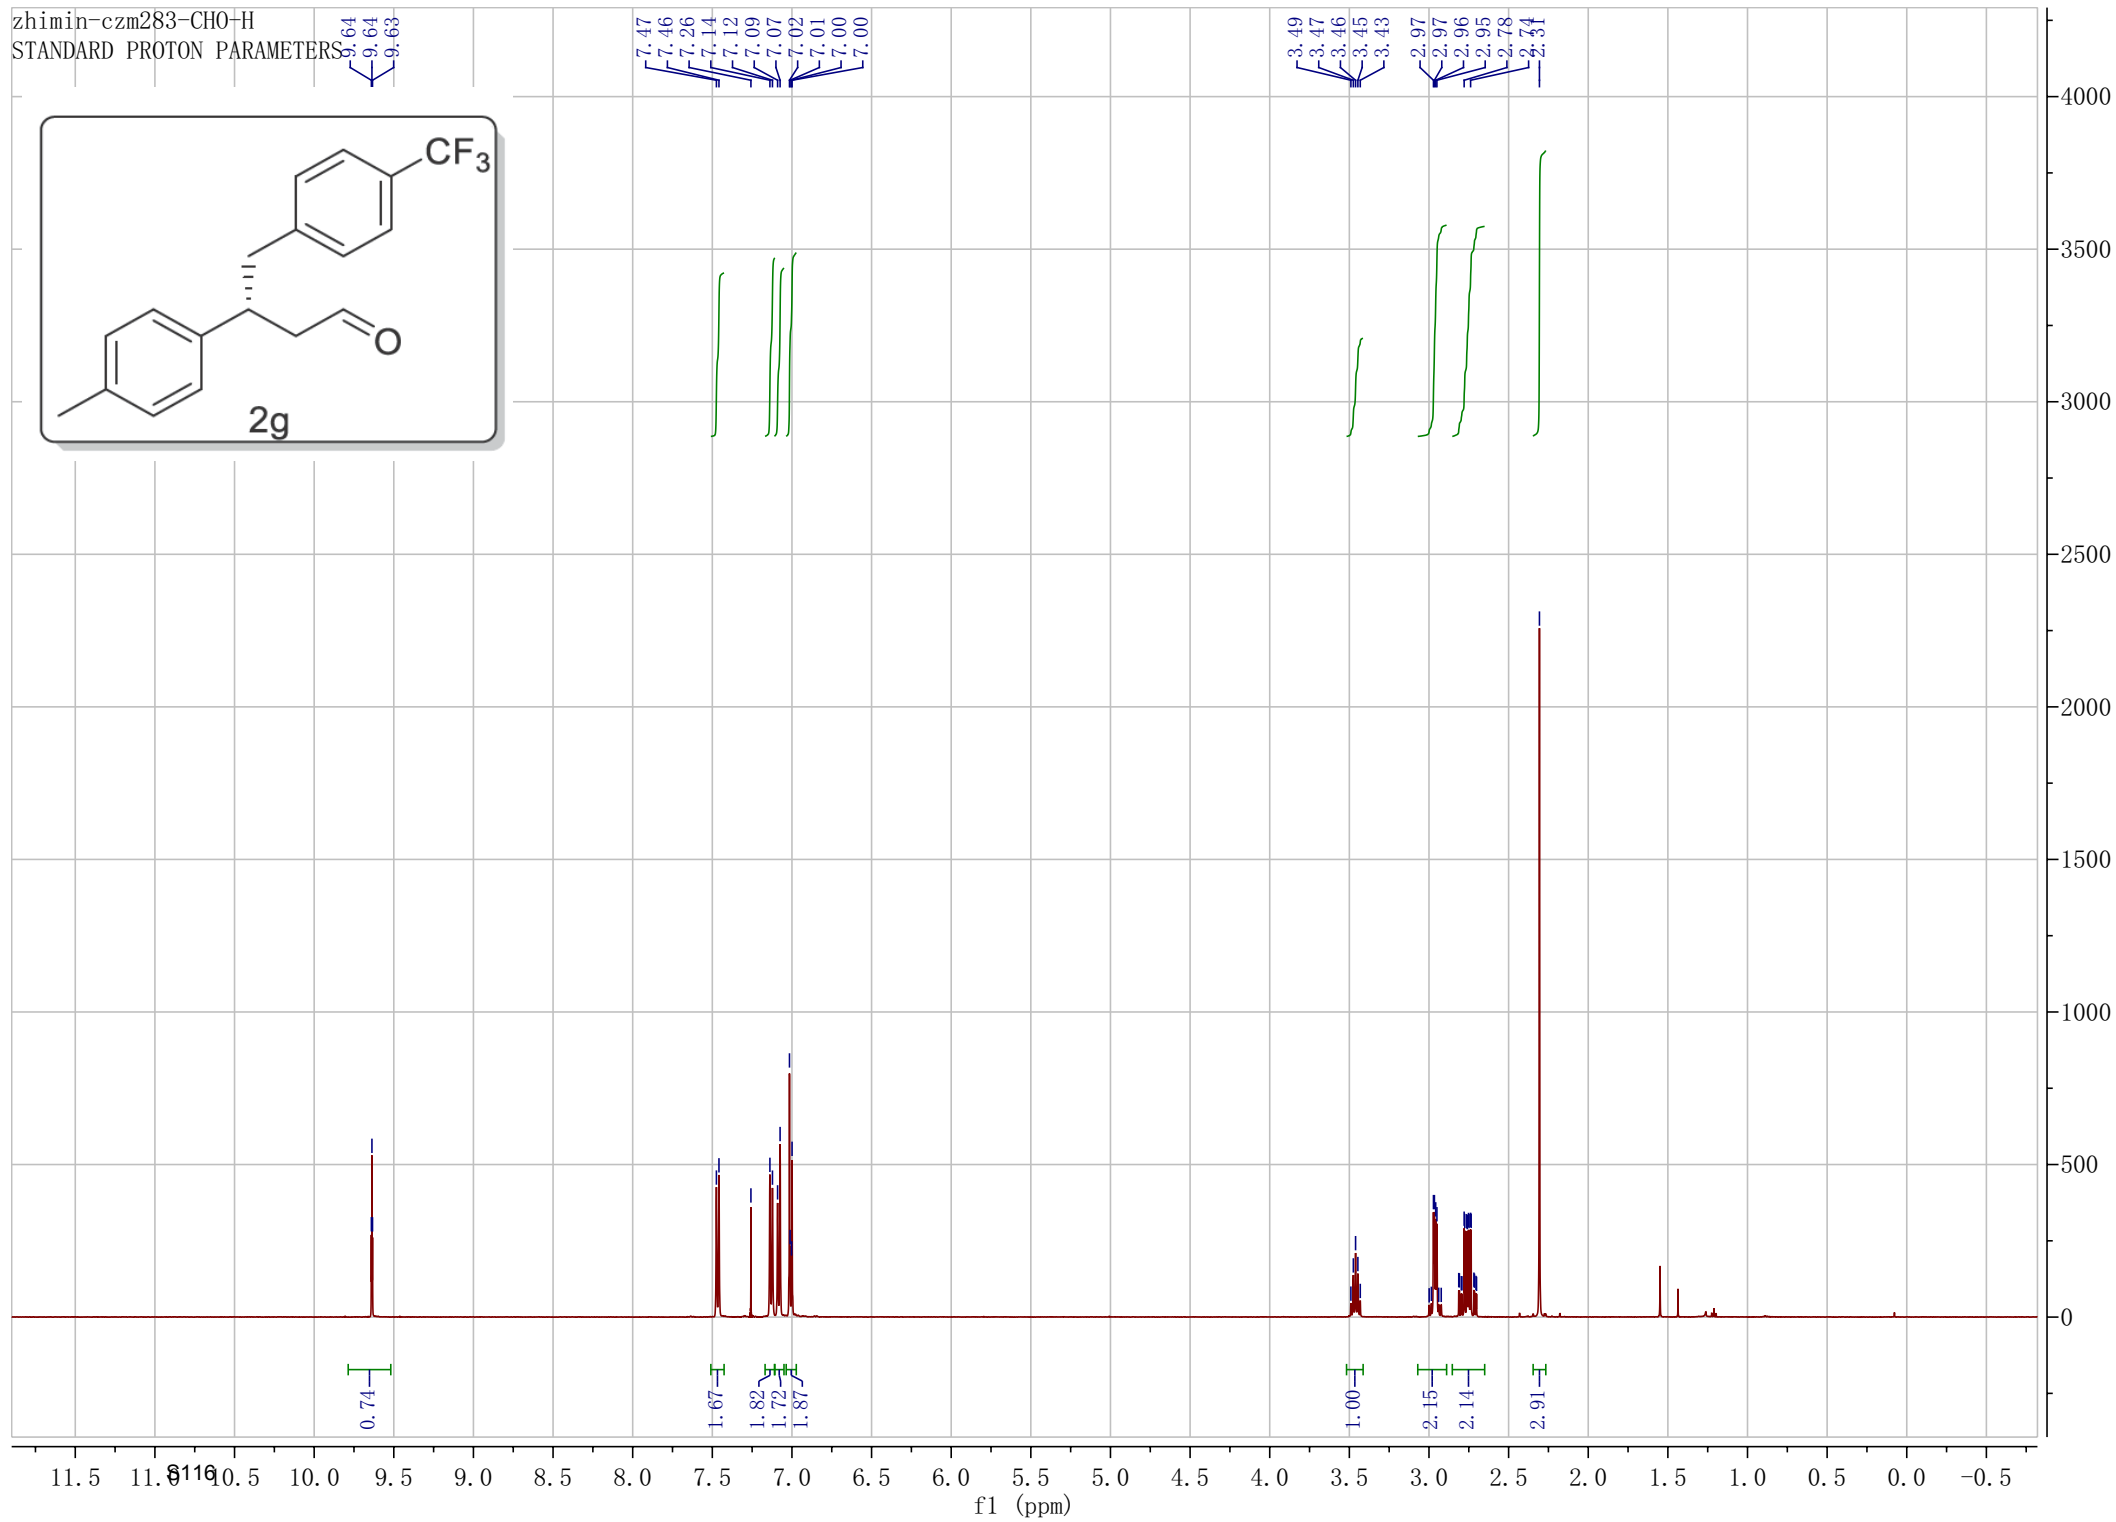

zhimin-czm283-CHO-C  
STANDARD CARBON PARAMETERS

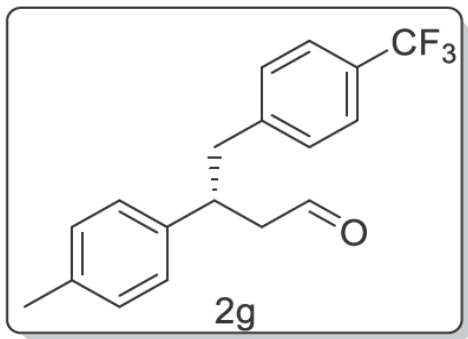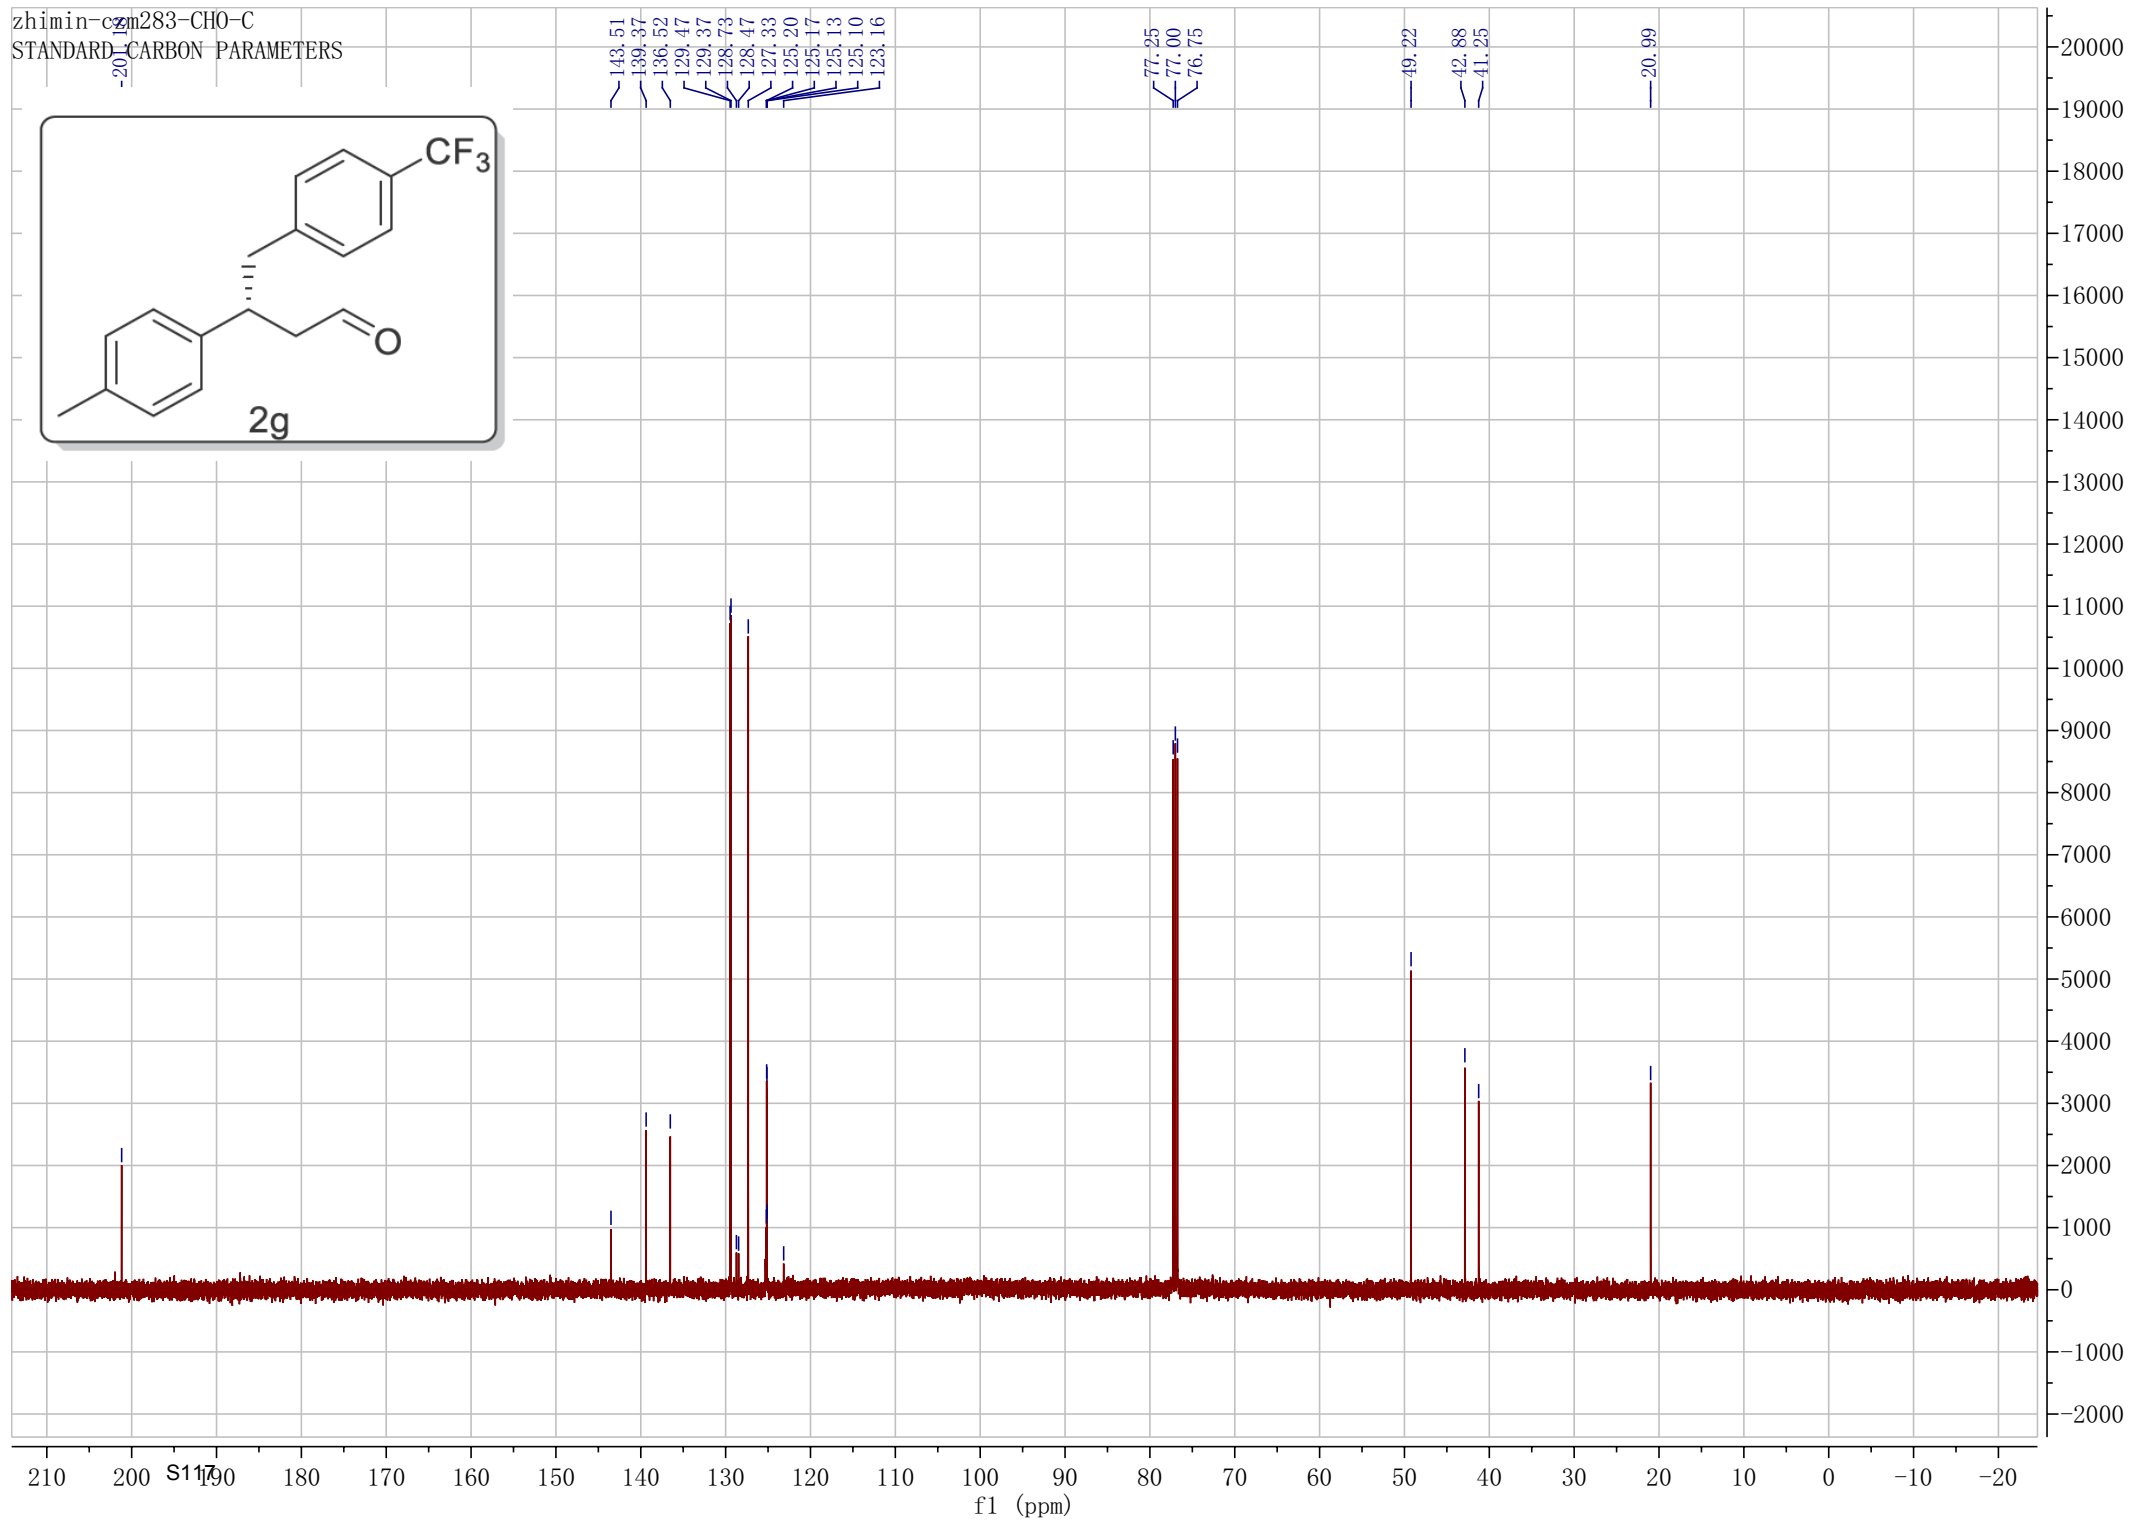

zhimin-czm270-CHO-300-F

19F OBSERVE

STANDARD PARAMETERS

62.80

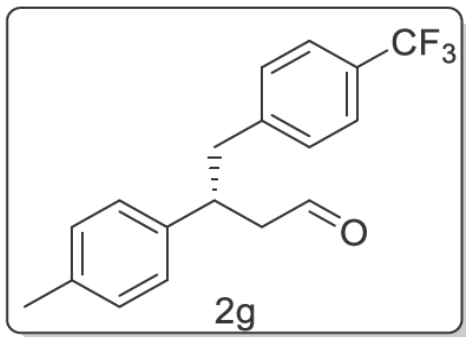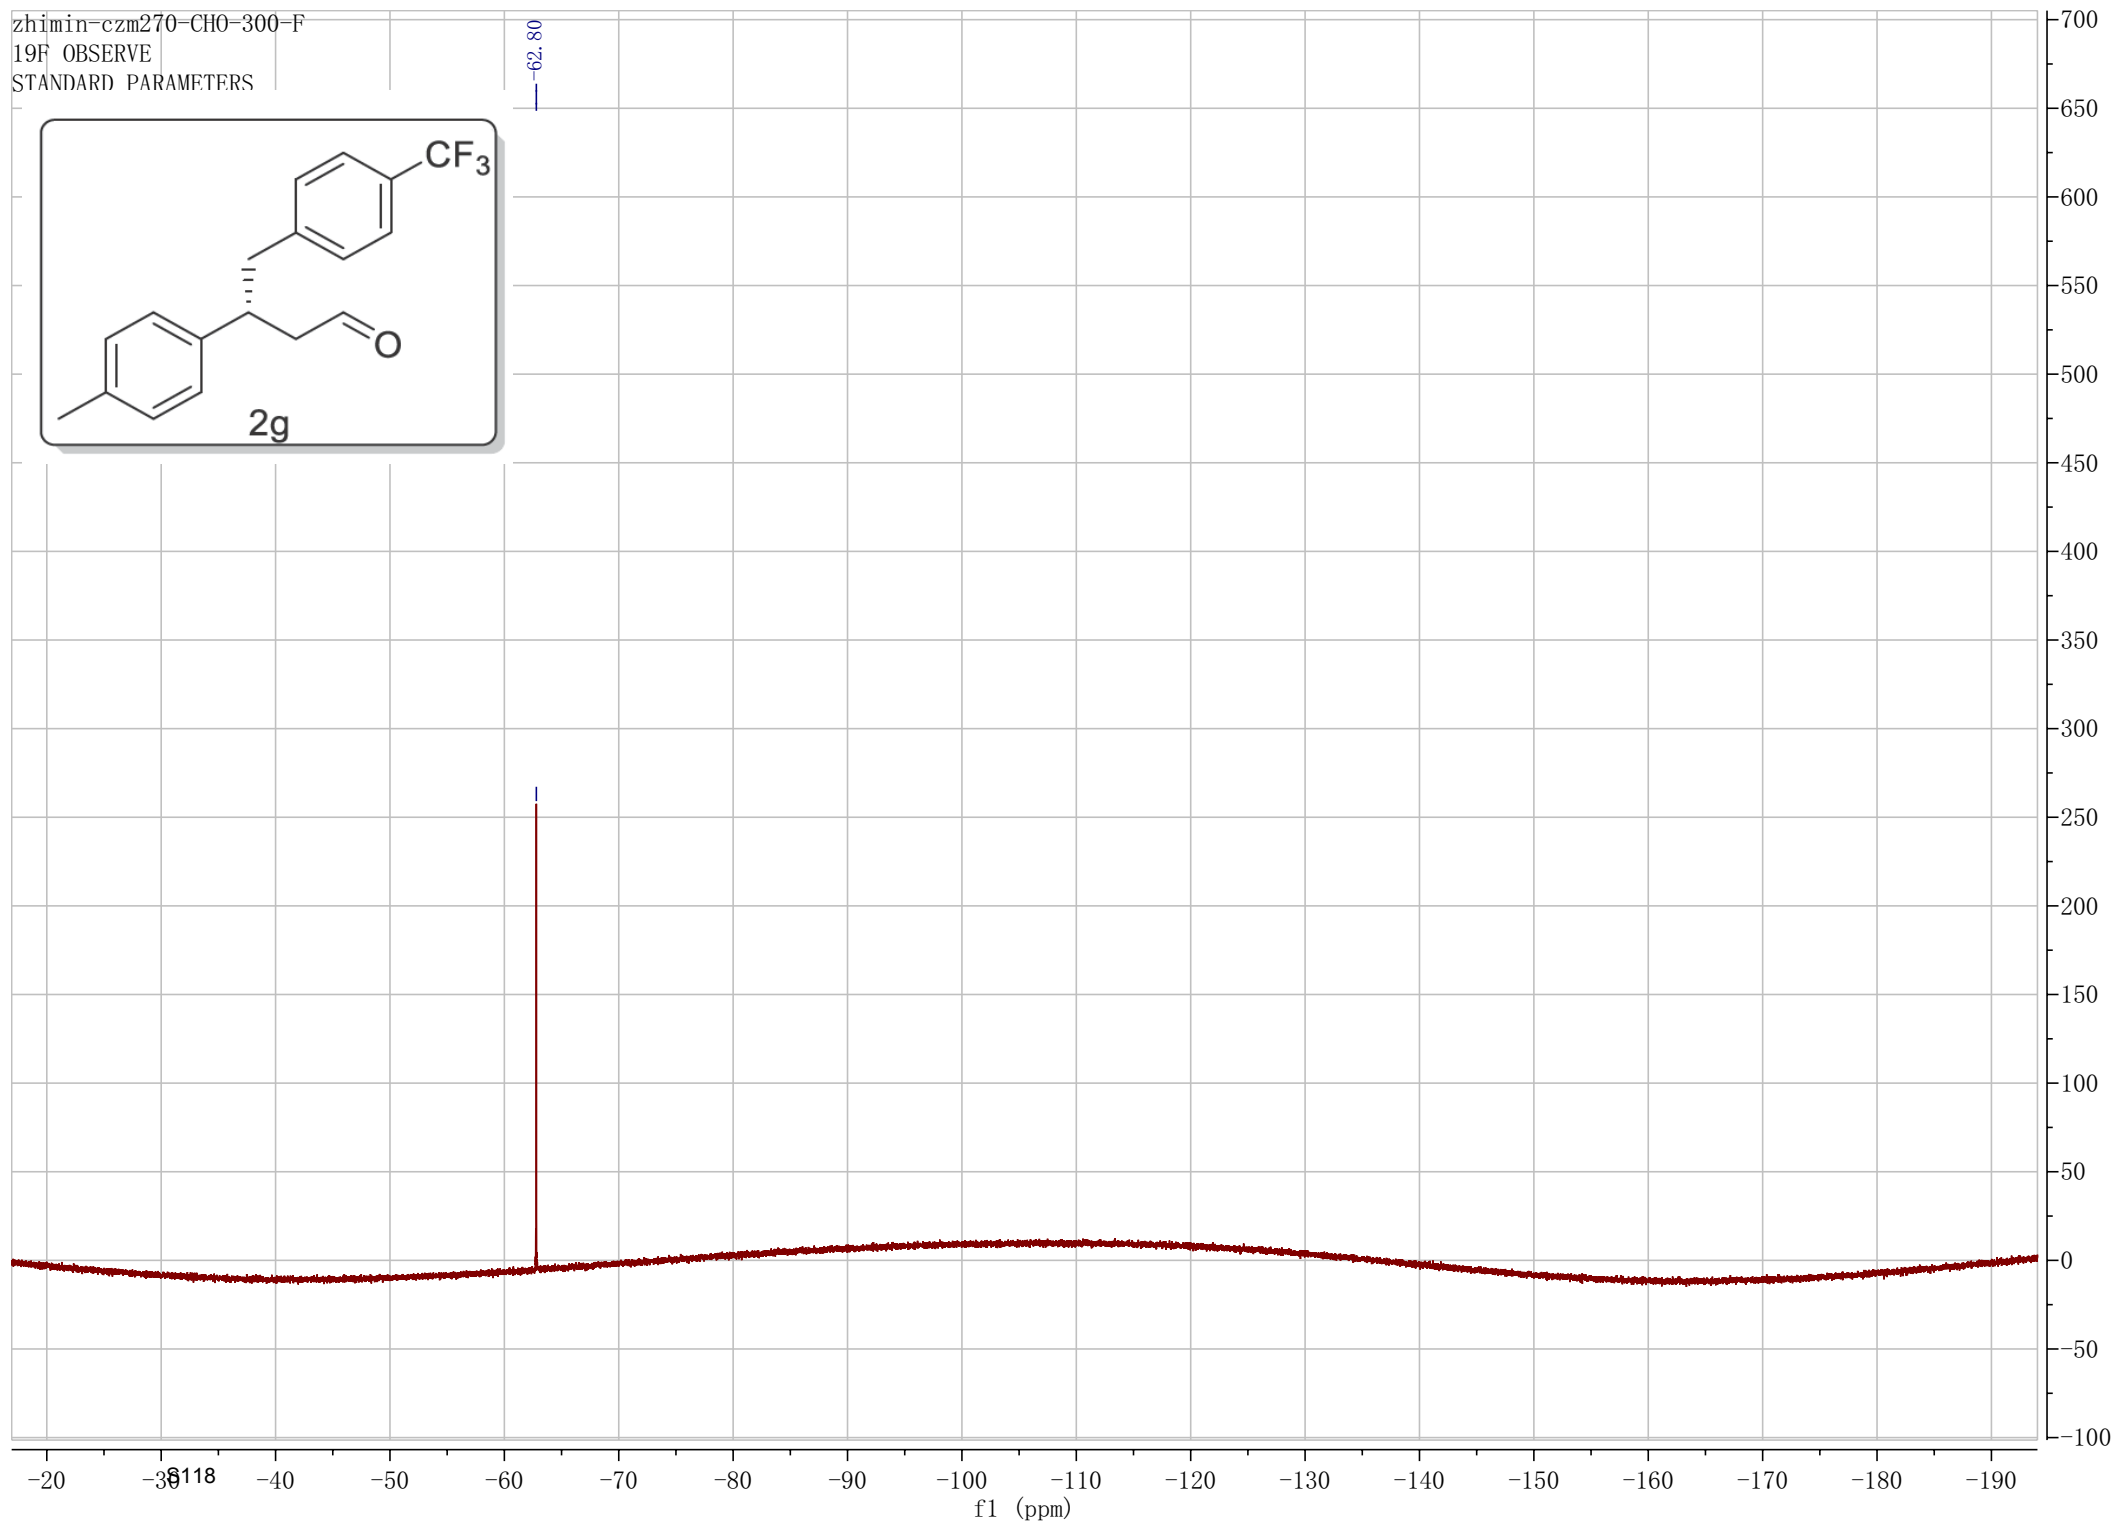

zhimin-czm274-OH-300-H  
UofUtah Unity300 NMR  
STANDARD 1H OBSERVE

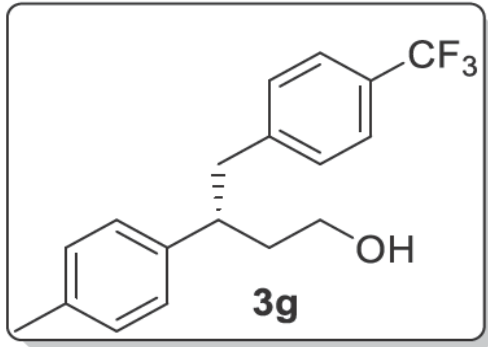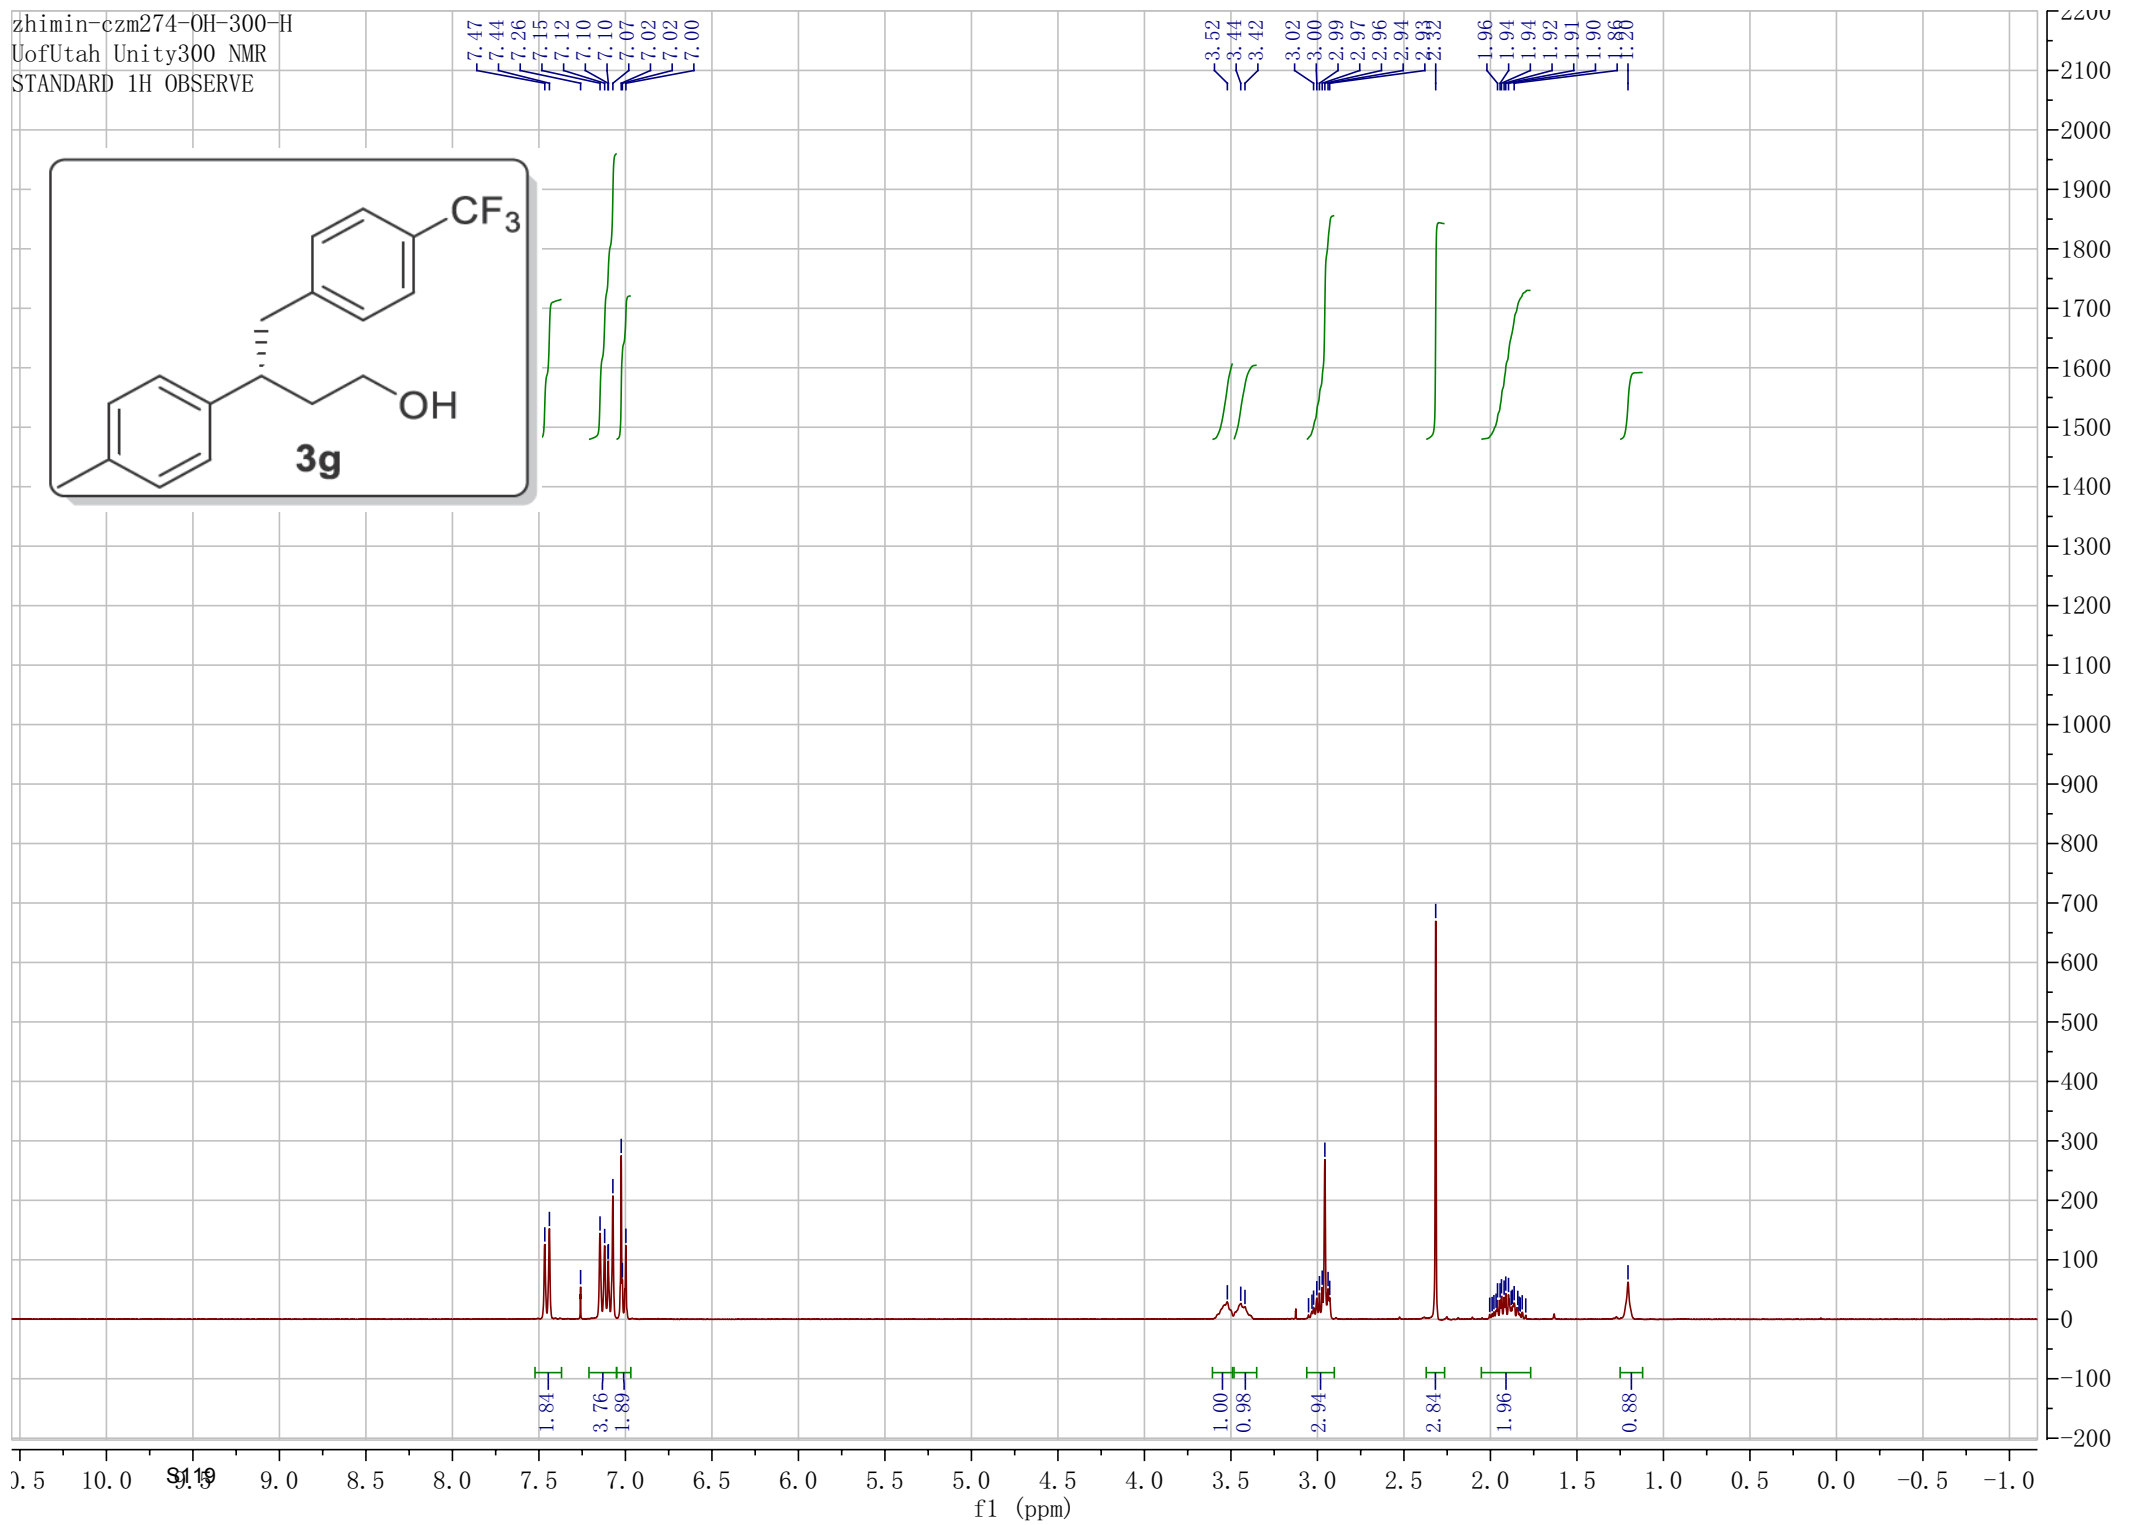

zhimin-czm274-OH-300-C  
13C OBSERVE

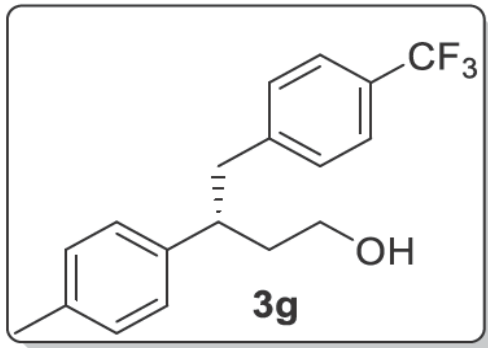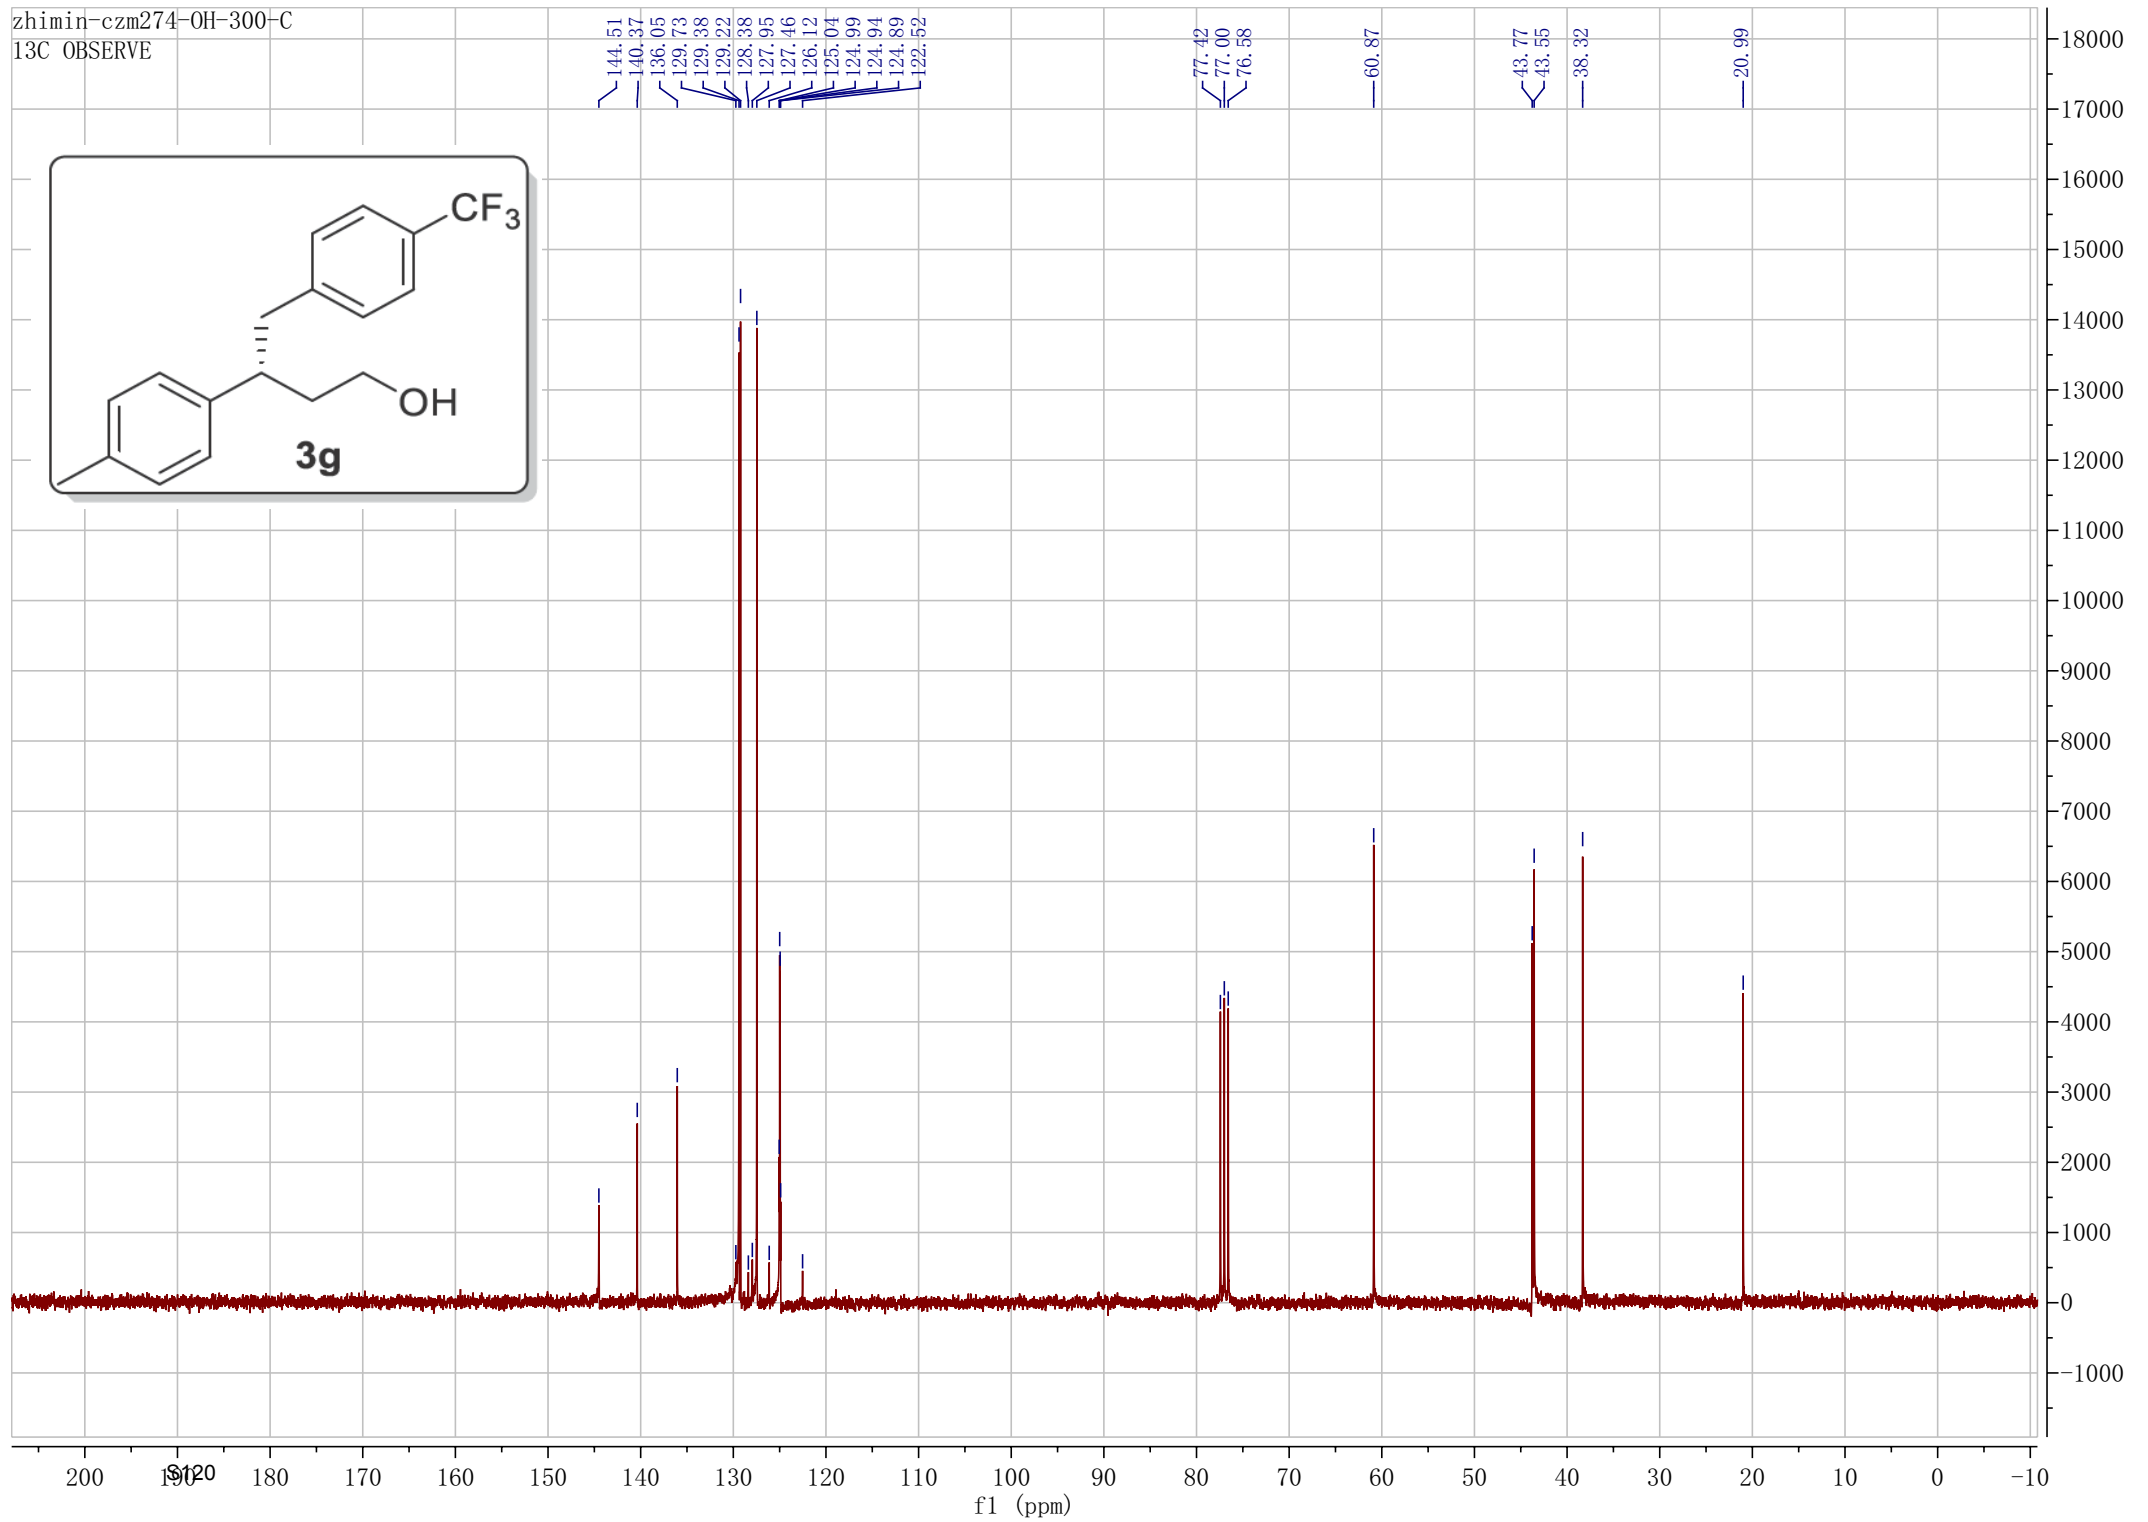

zhimin-czm274-OH-300-F

19F OBSERVE

STANDARD PARAMETERS

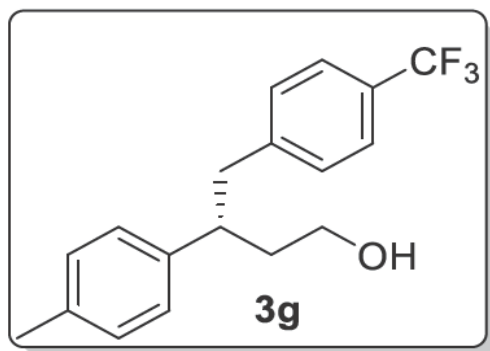

62.70

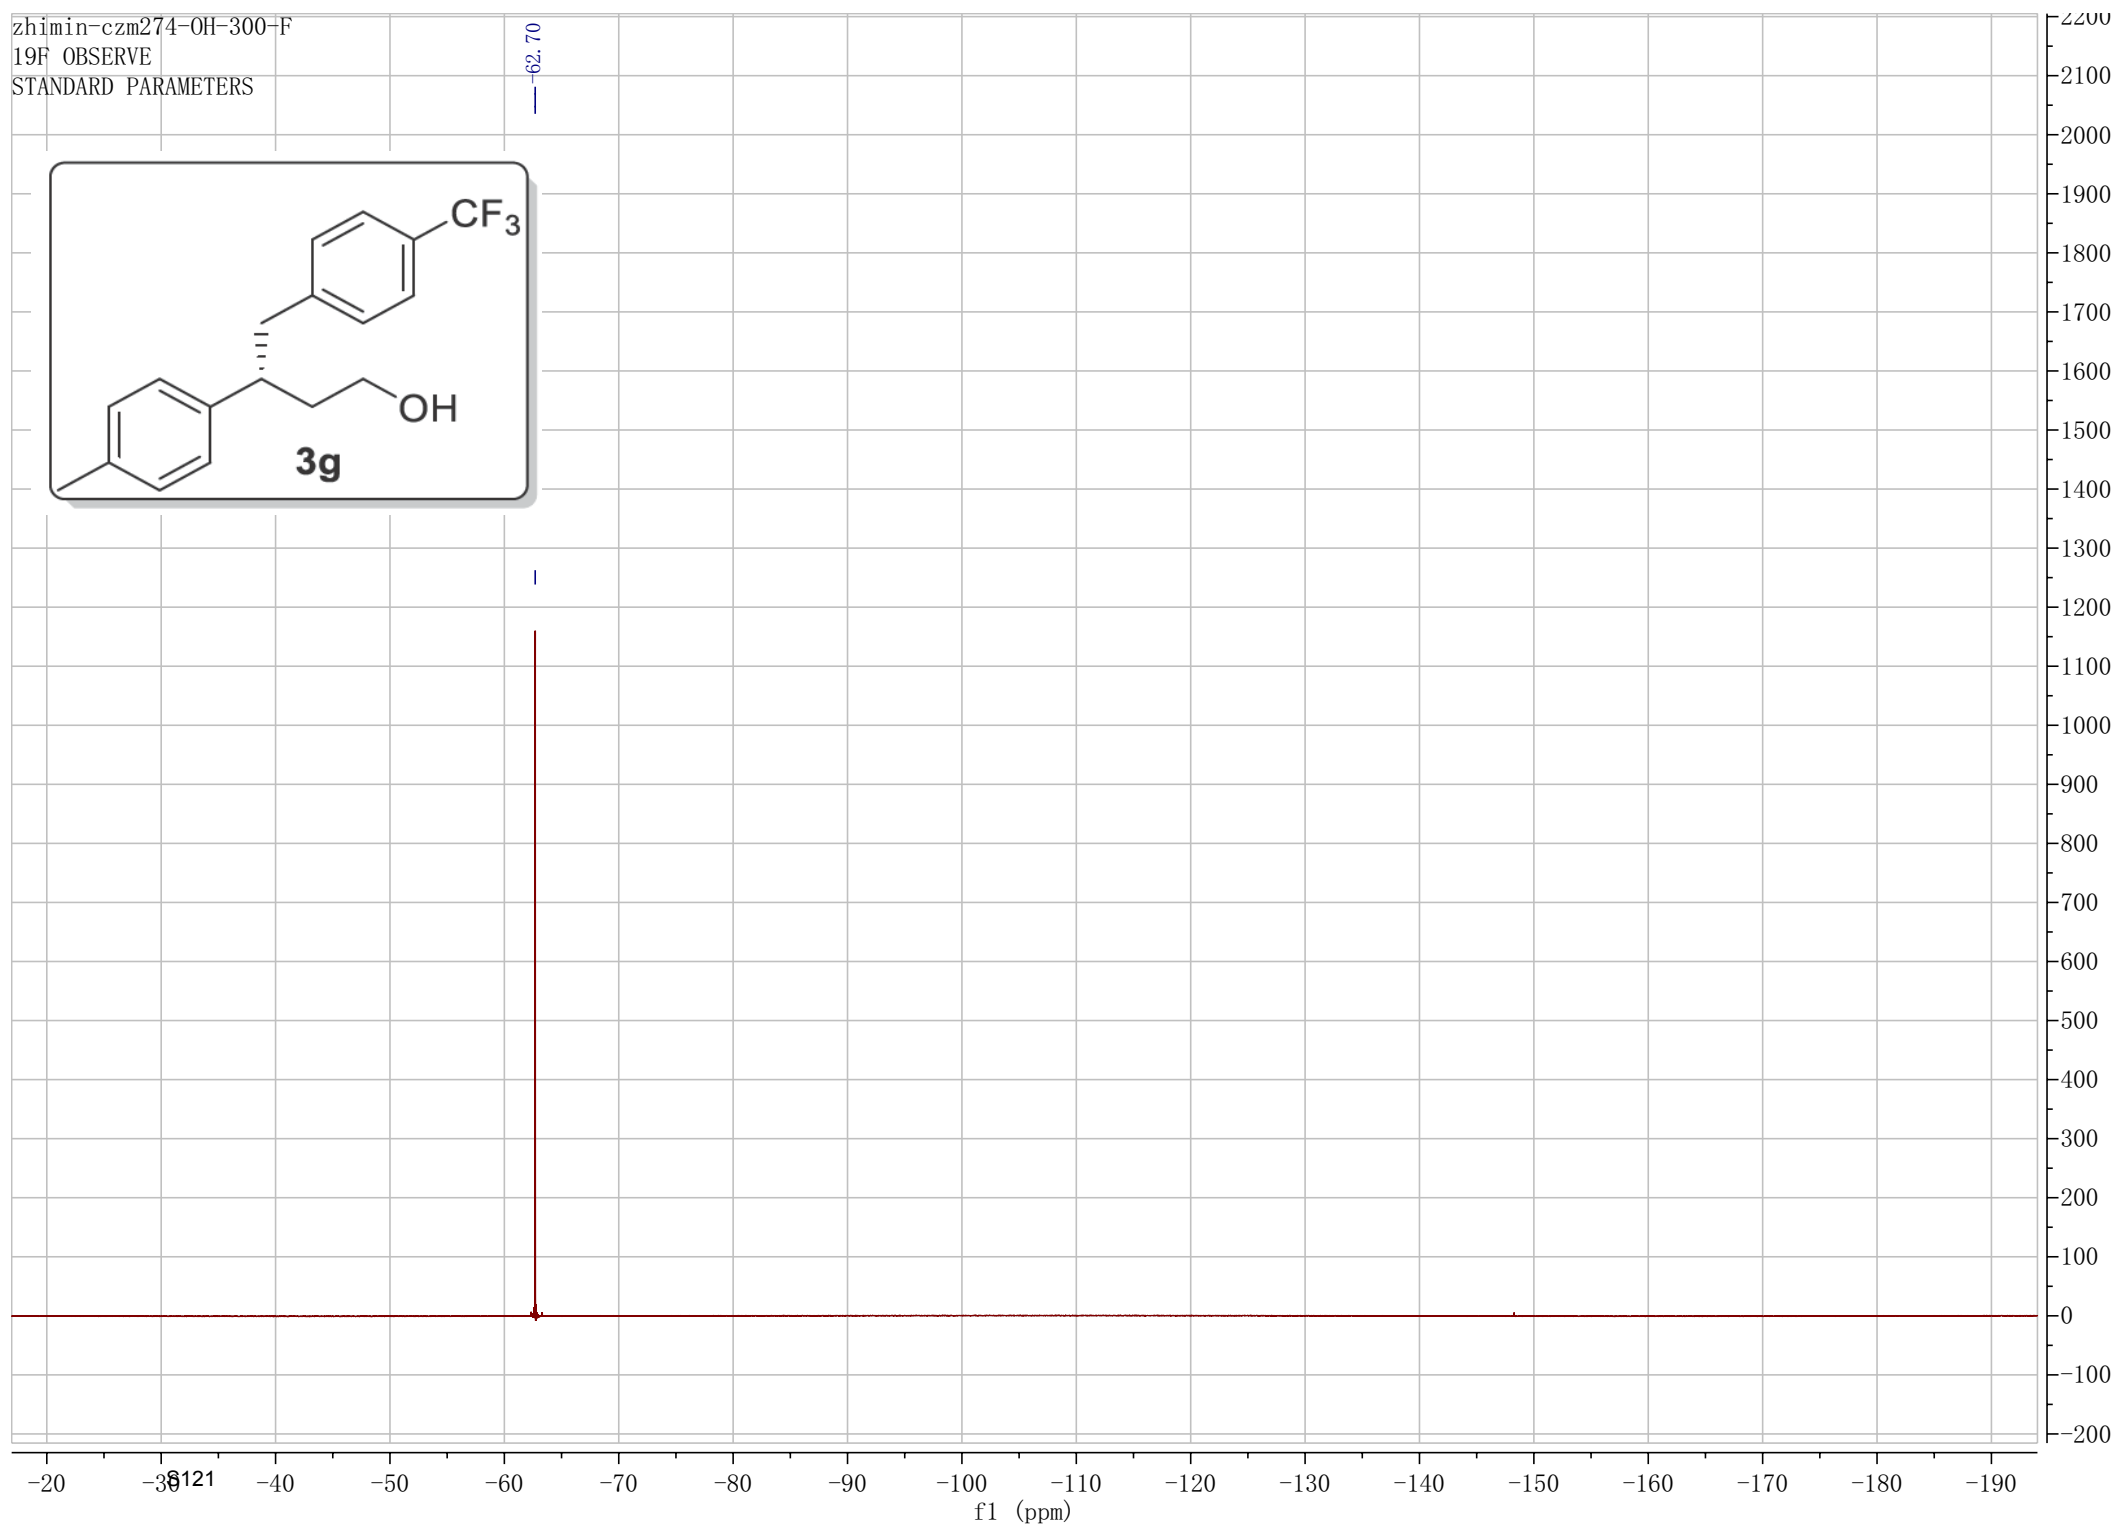

zhimin-czm99-CHO-H  
STANDARD-PROTON PARAMETERS

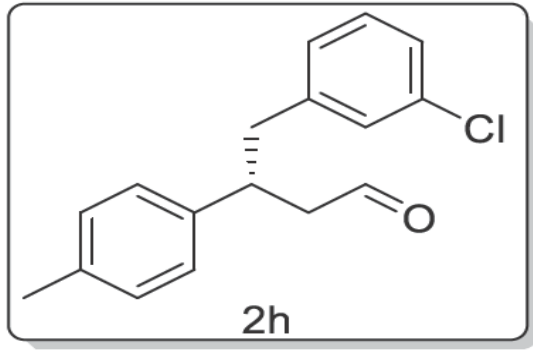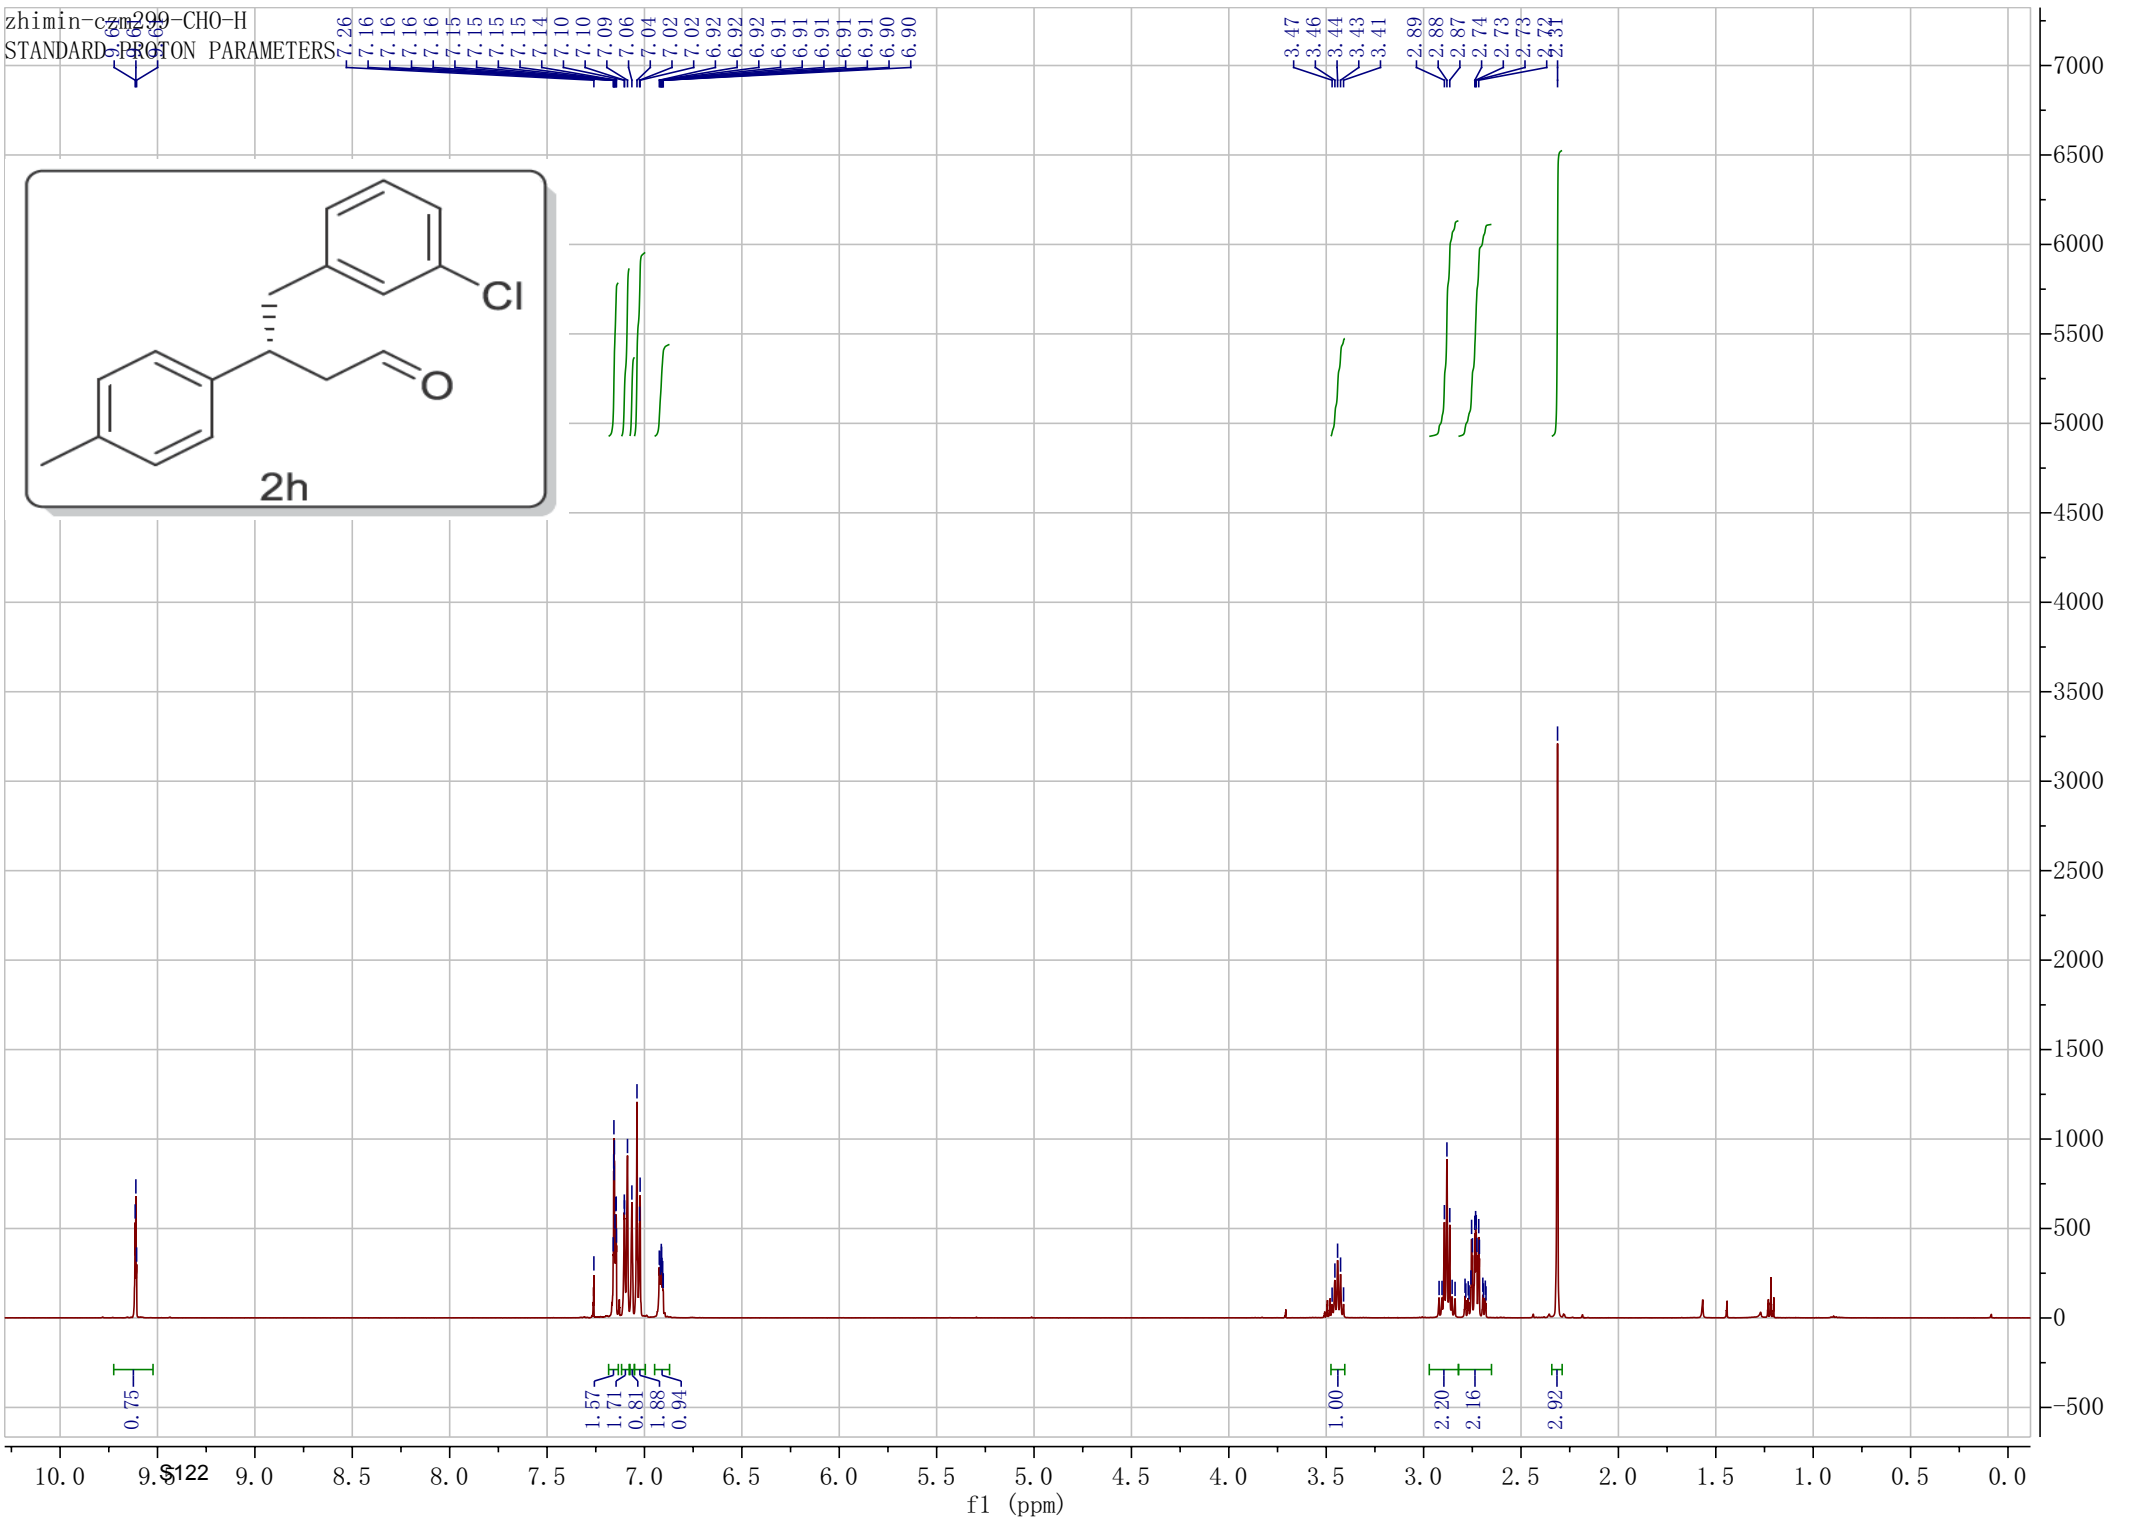



zhimin-299-CHO-C  
STANDARD CARBON PARAMETERS



141.44  
139.59  
136.43  
134.04  
129.48  
129.33  
129.24  
127.37  
127.29  
126.48

77.25  
77.00  
76.75

49.00  
42.86  
41.34

20.97

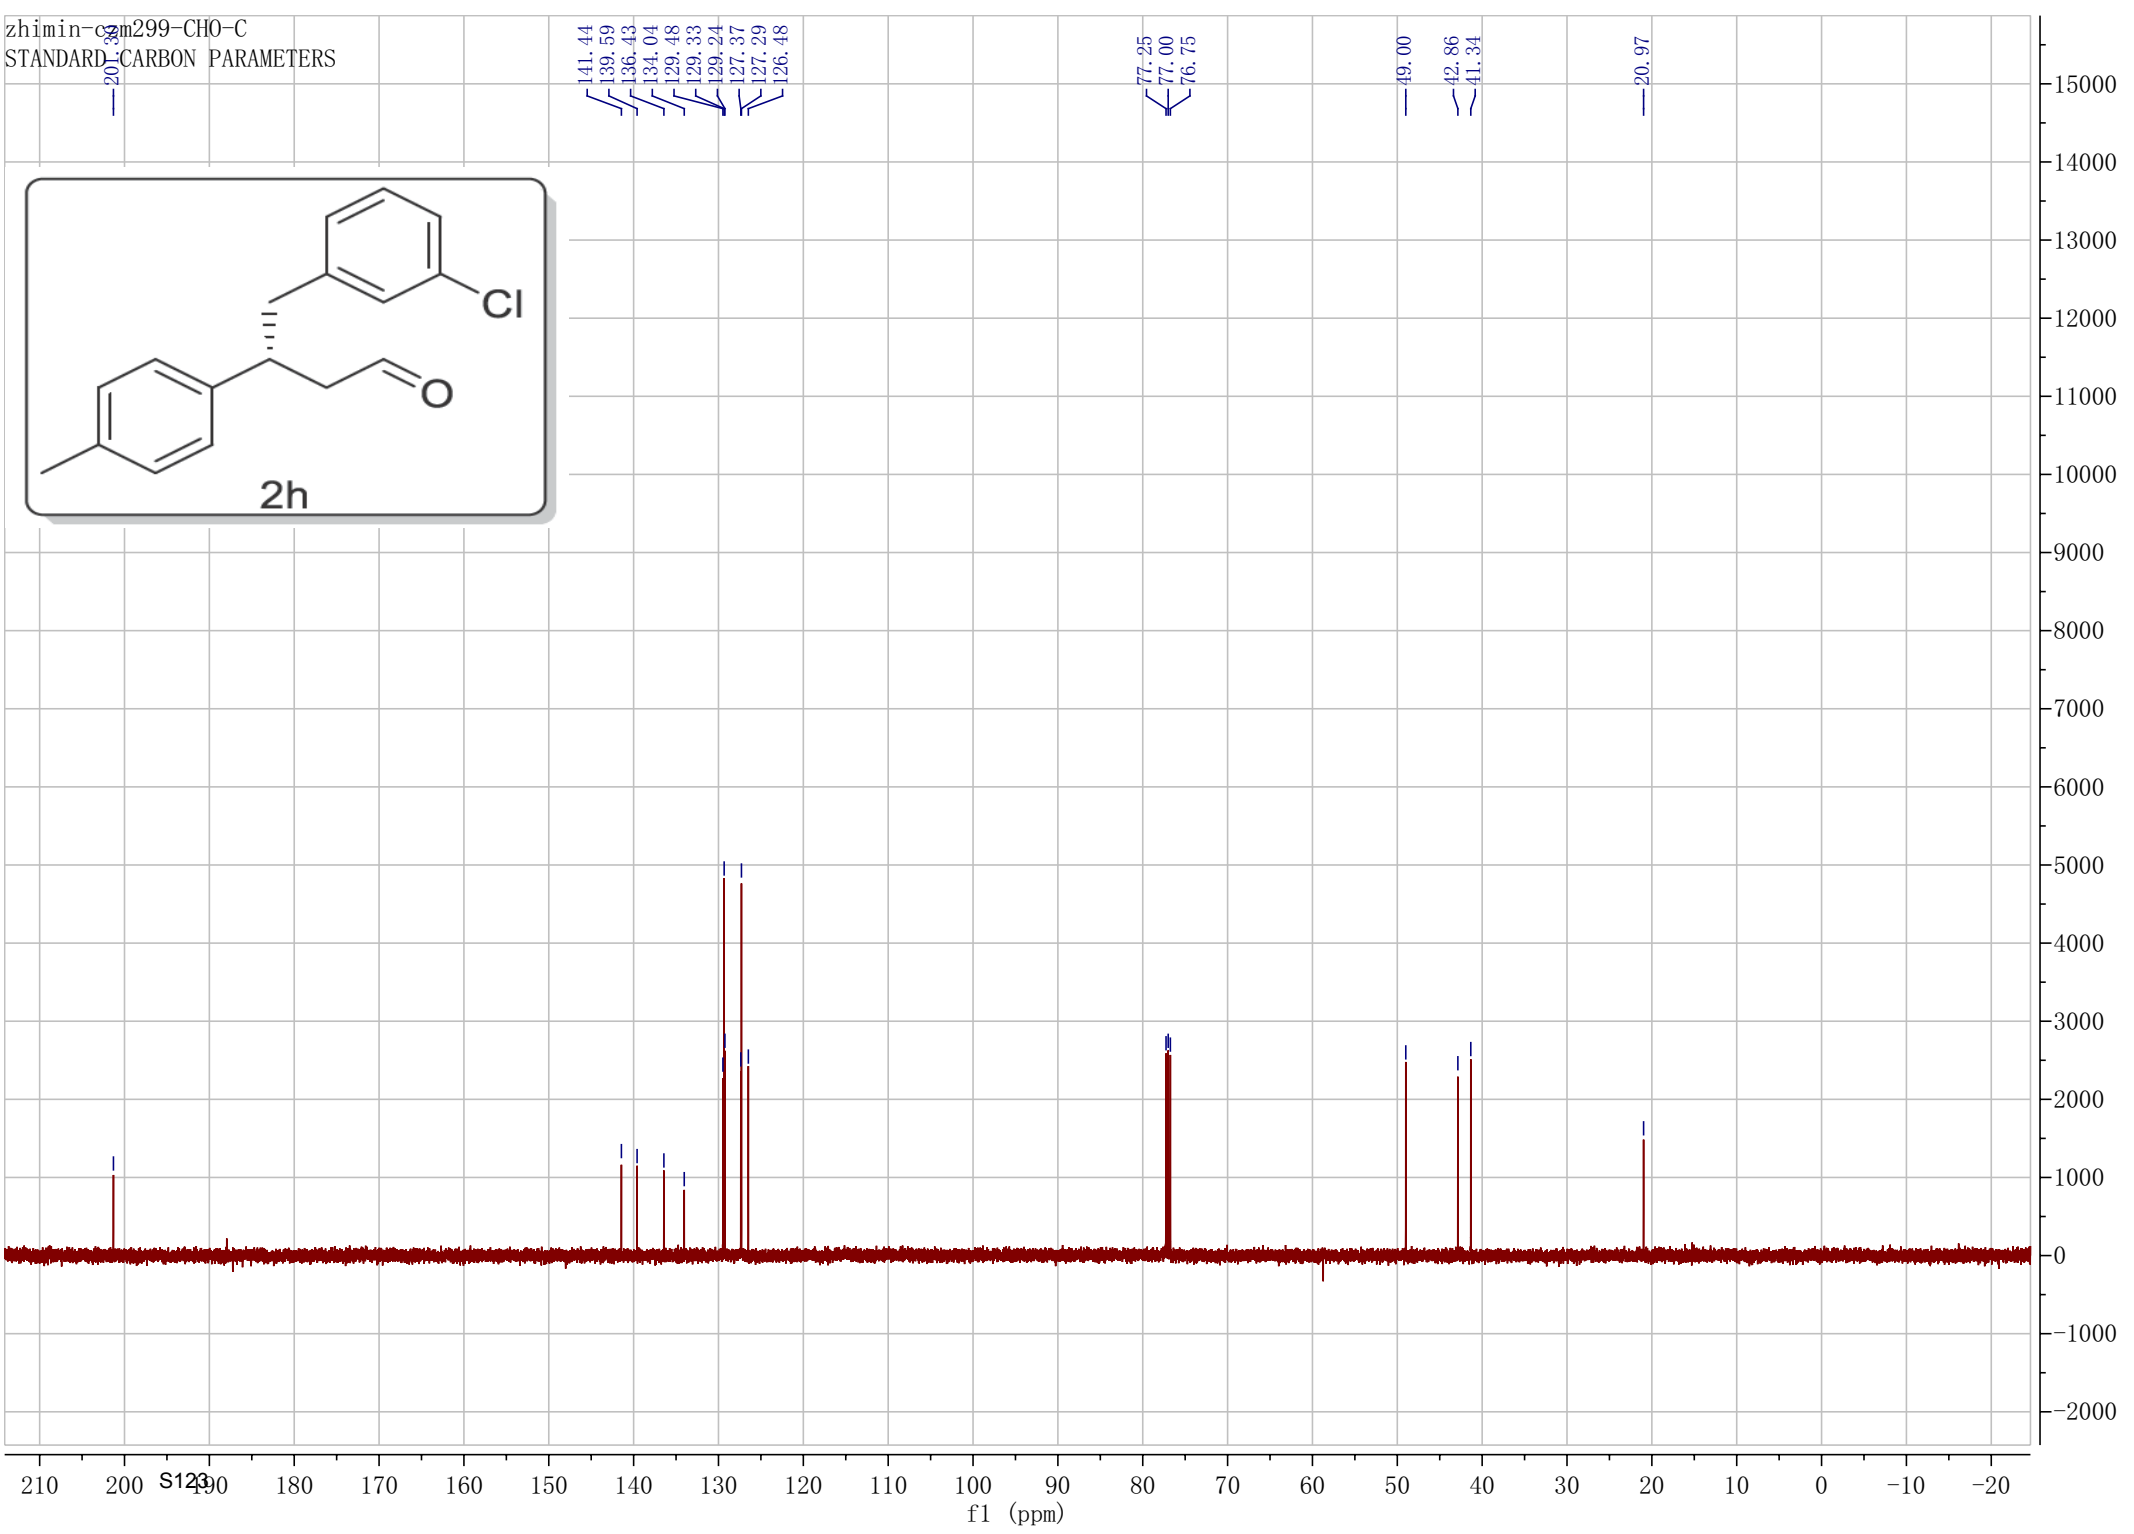

zhimin-czm299-OH-300-H  
UofUtah Unity300 NMR  
STANDARD 1H OBSERVE

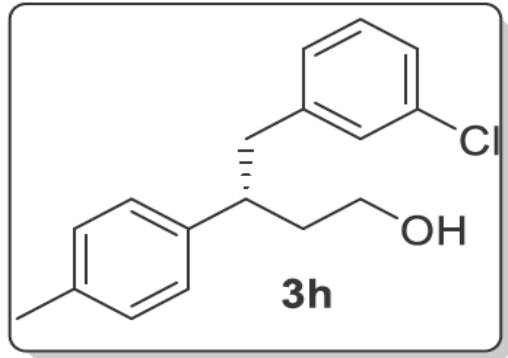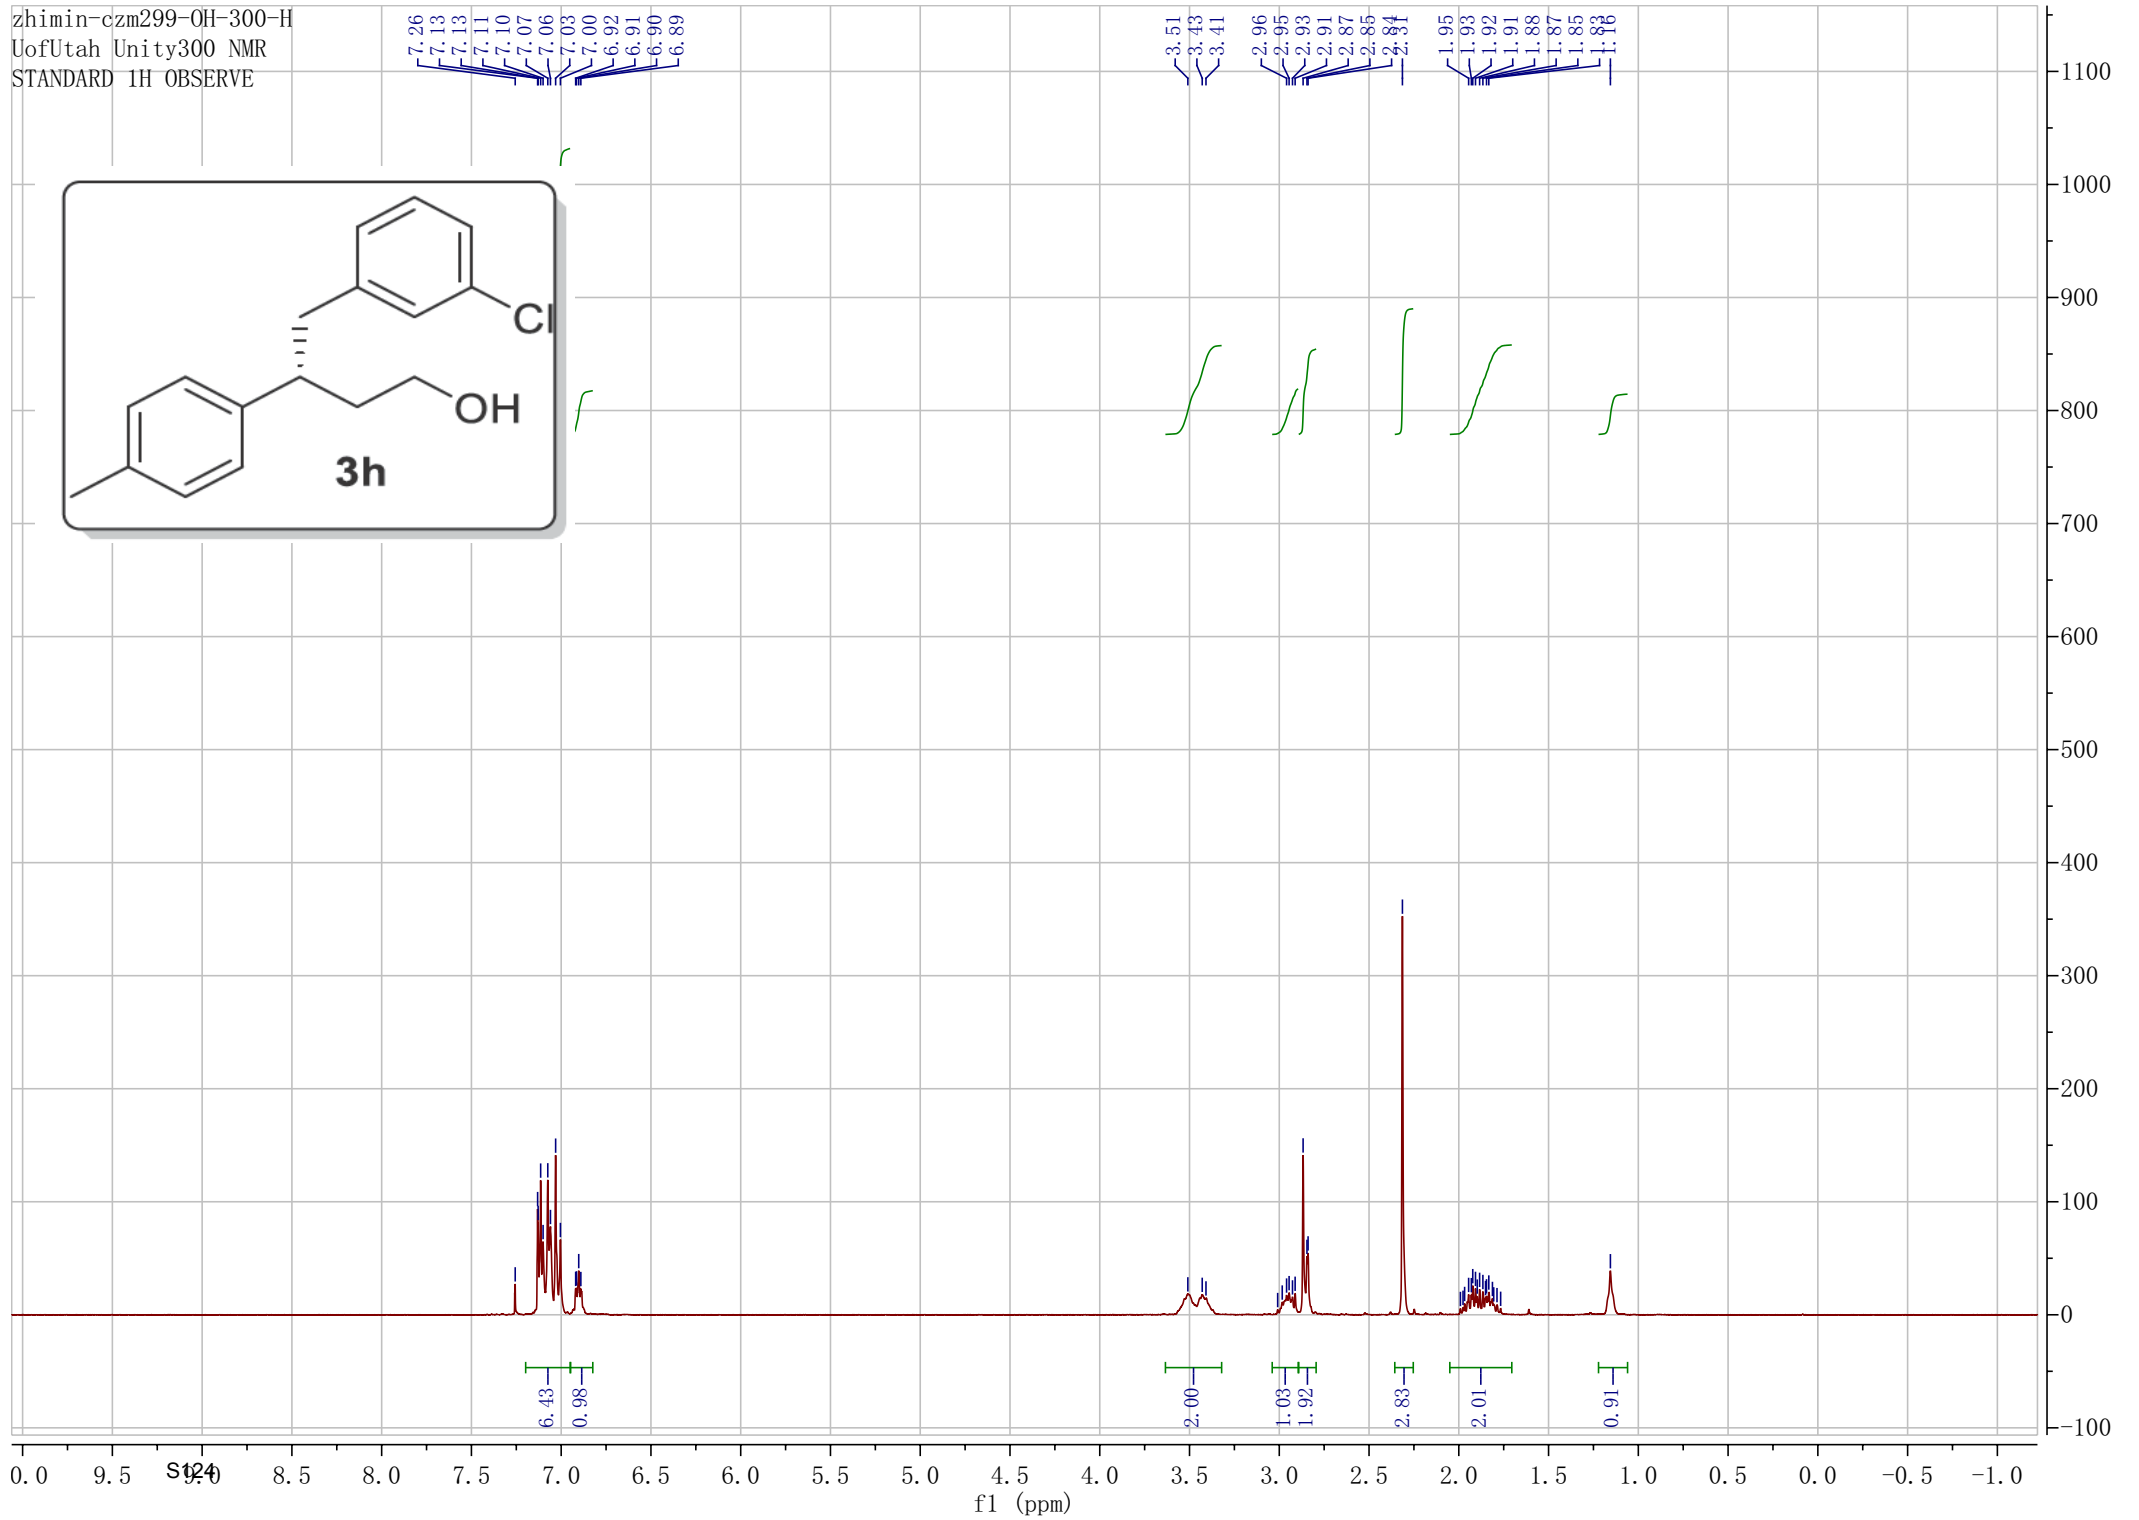

zhimin-czm299-OH-300-C  
13C OBSERVE

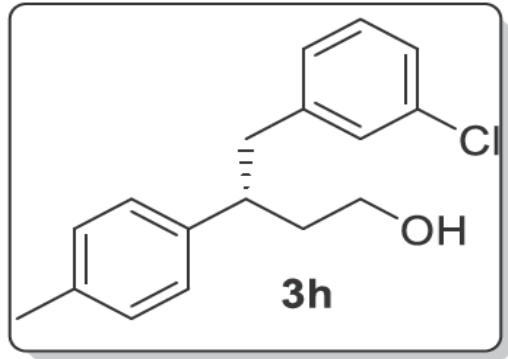

142.44  
140.61  
135.97  
133.81  
129.29  
129.19  
127.43  
127.33  
126.06

77.42  
77.00  
76.58

60.98

43.81  
43.48

38.14

21.00

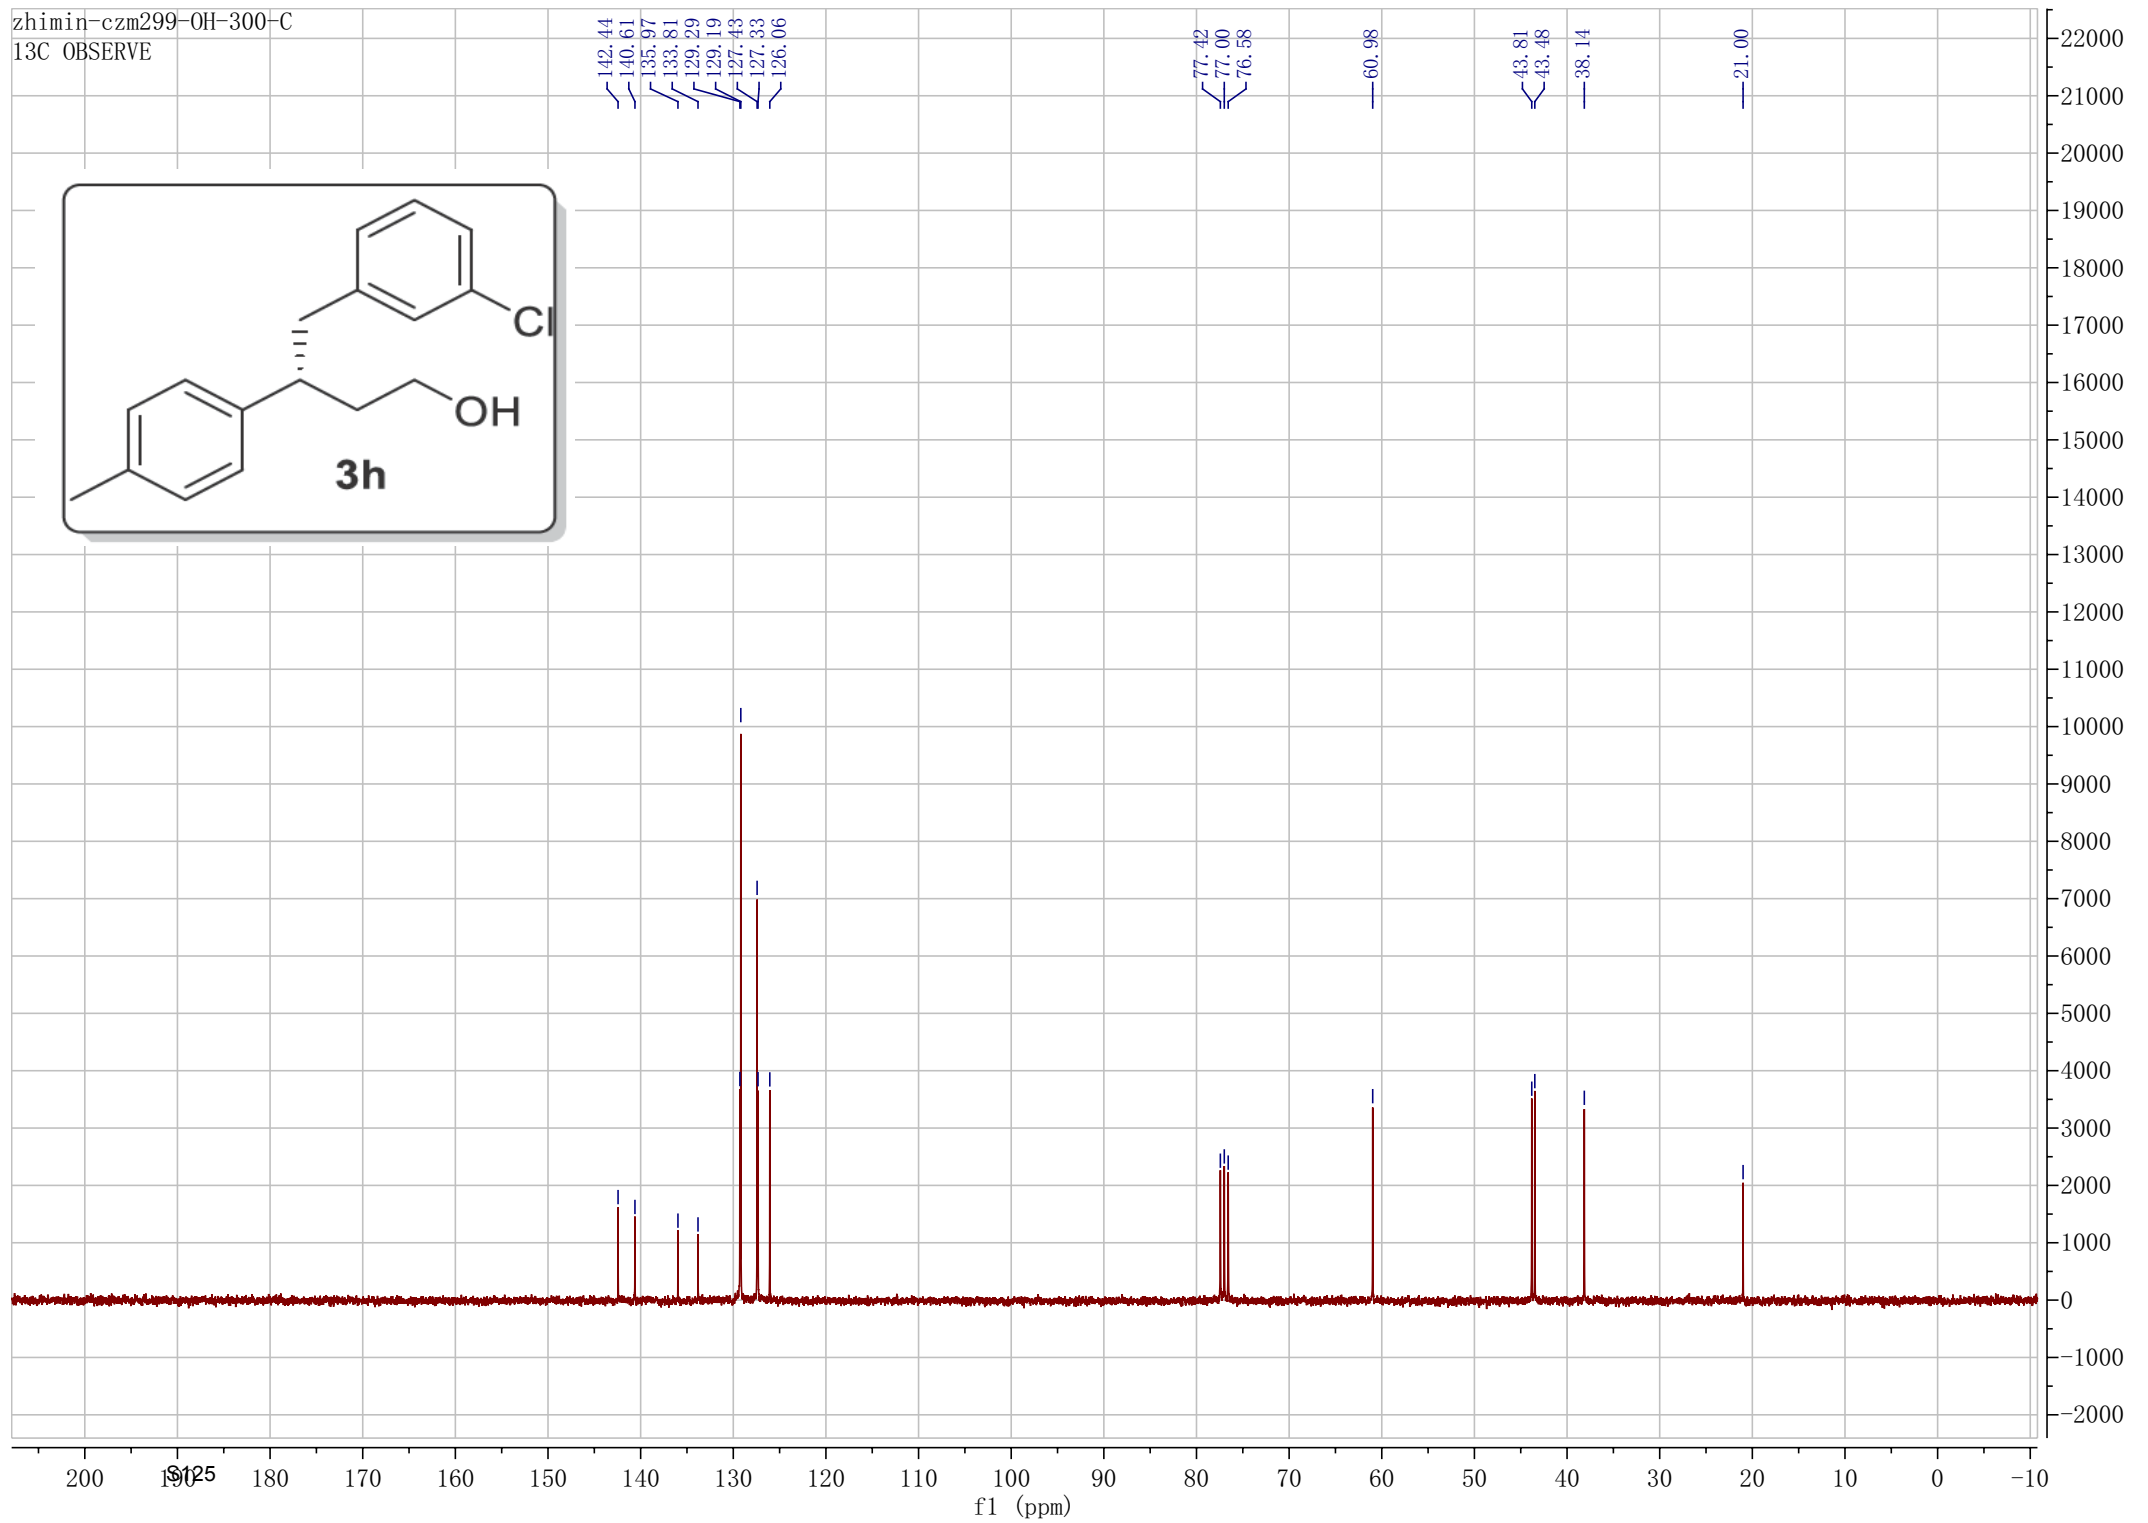

zhimin-827437-CHO-500-H  
STANDARD: PROTON PARAMETERS

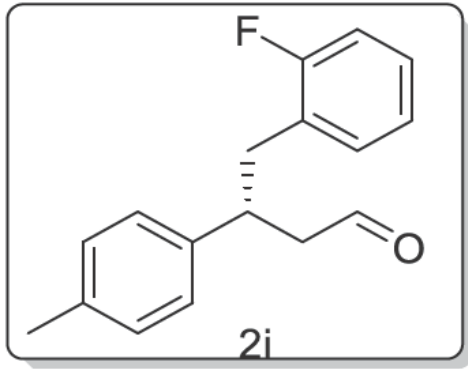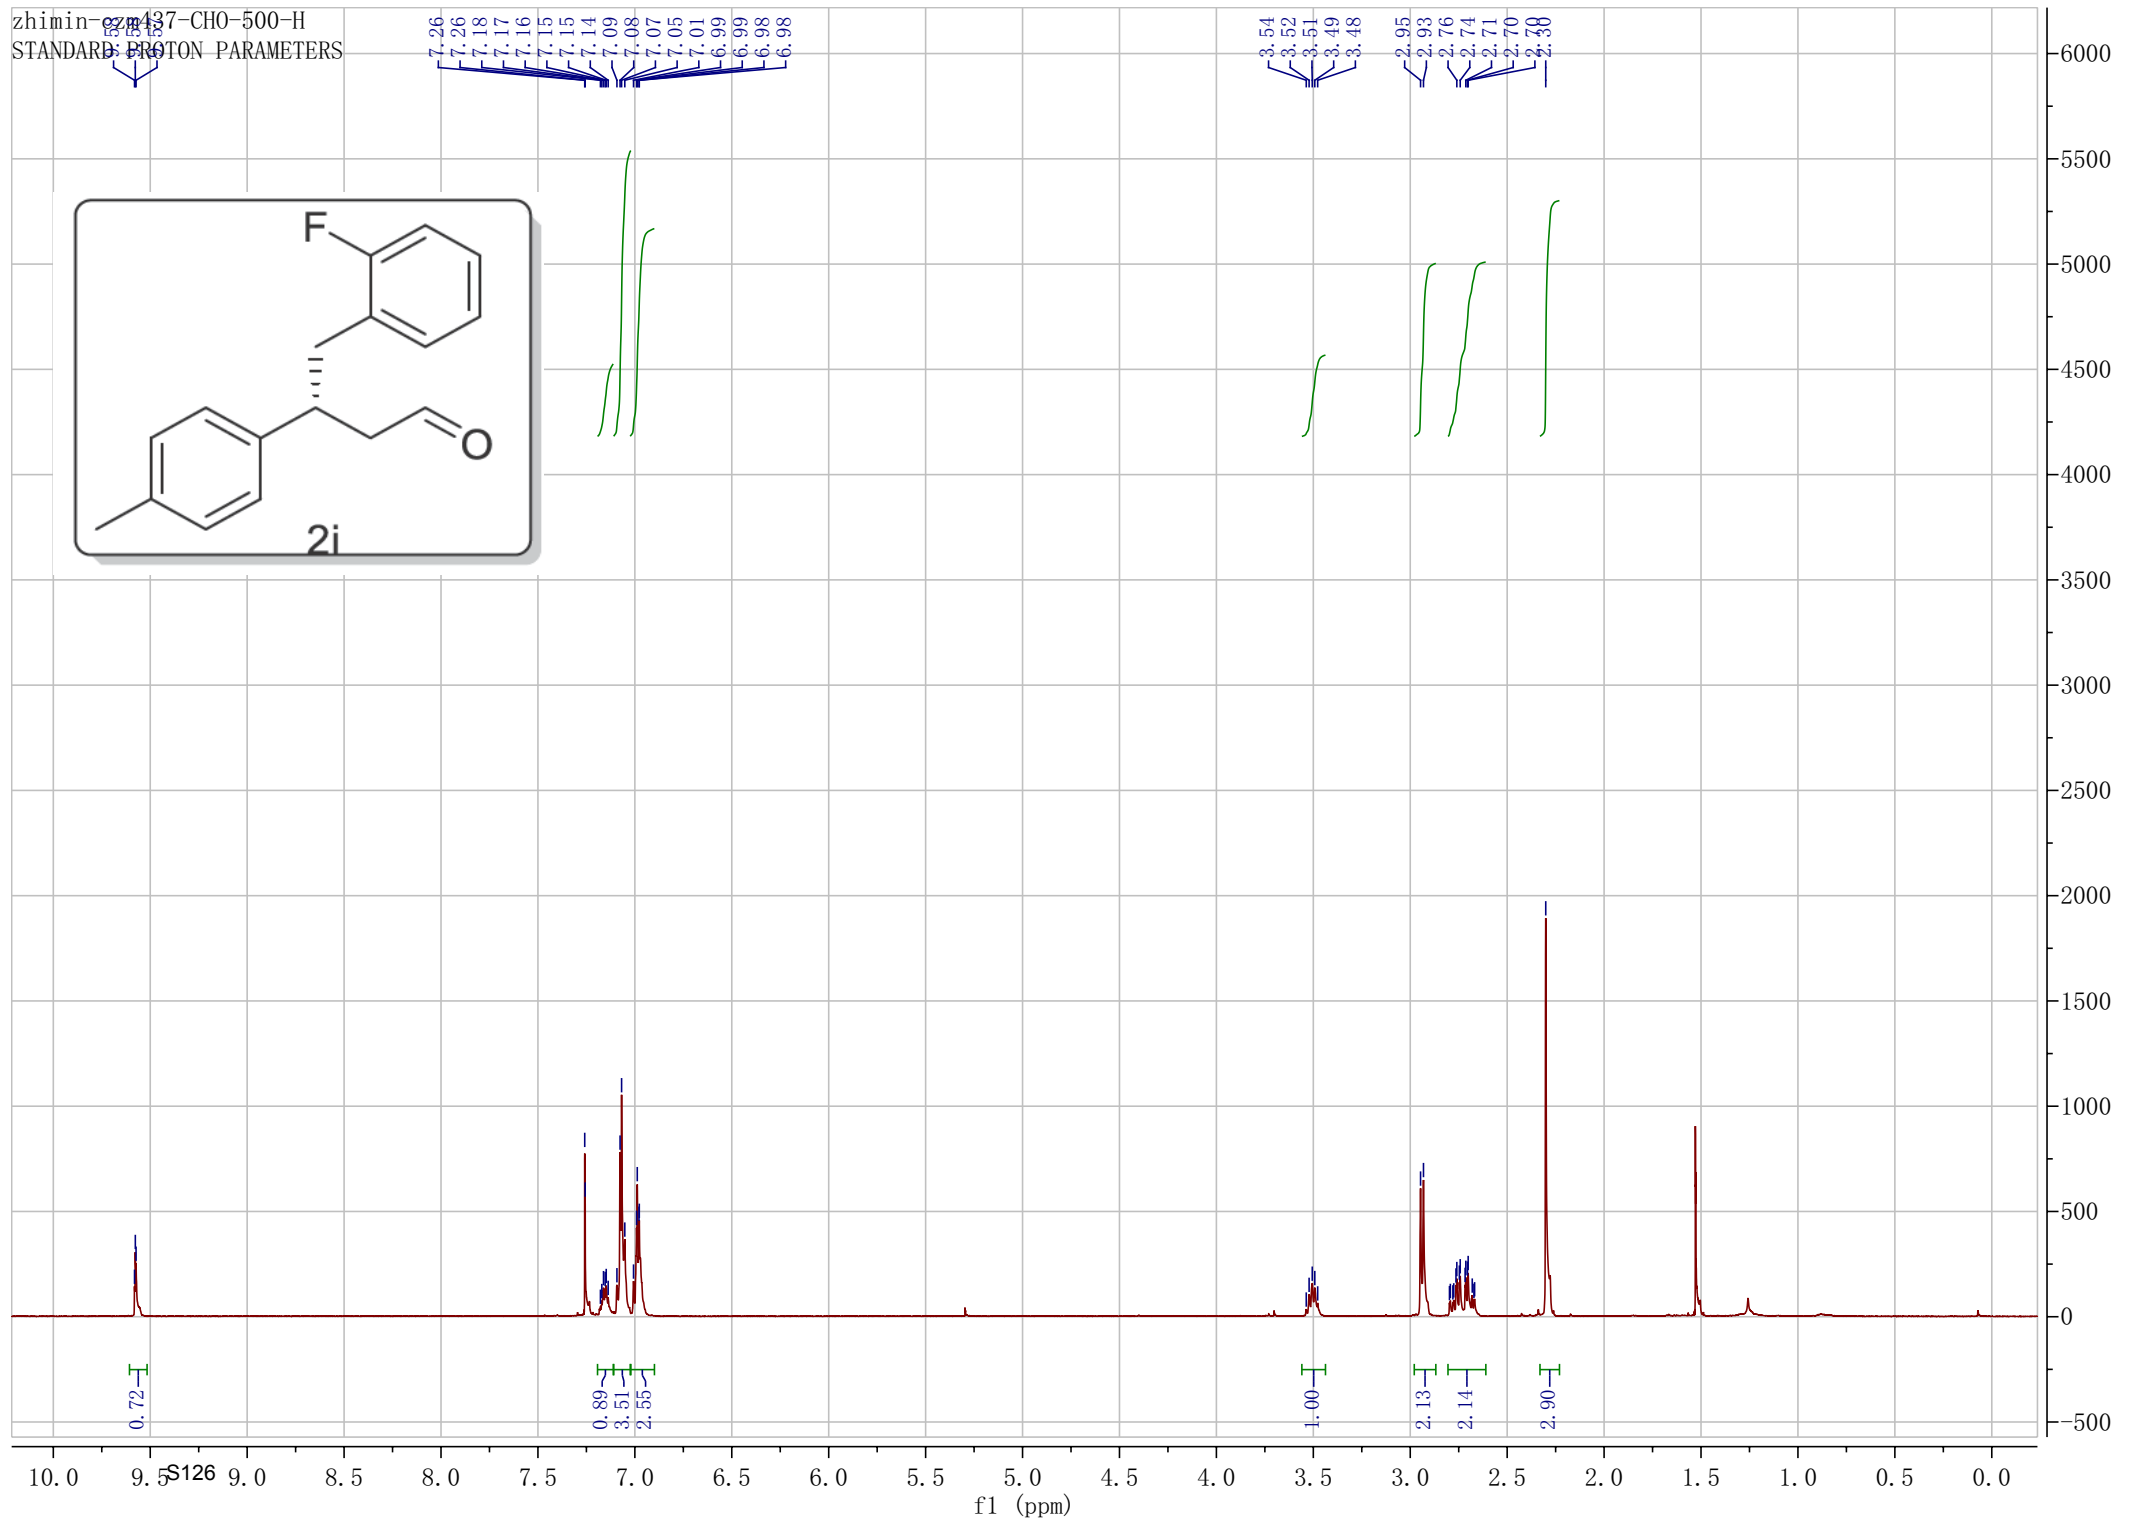

zhimin-czm437-CHO-300-C  
13C OBSERVE

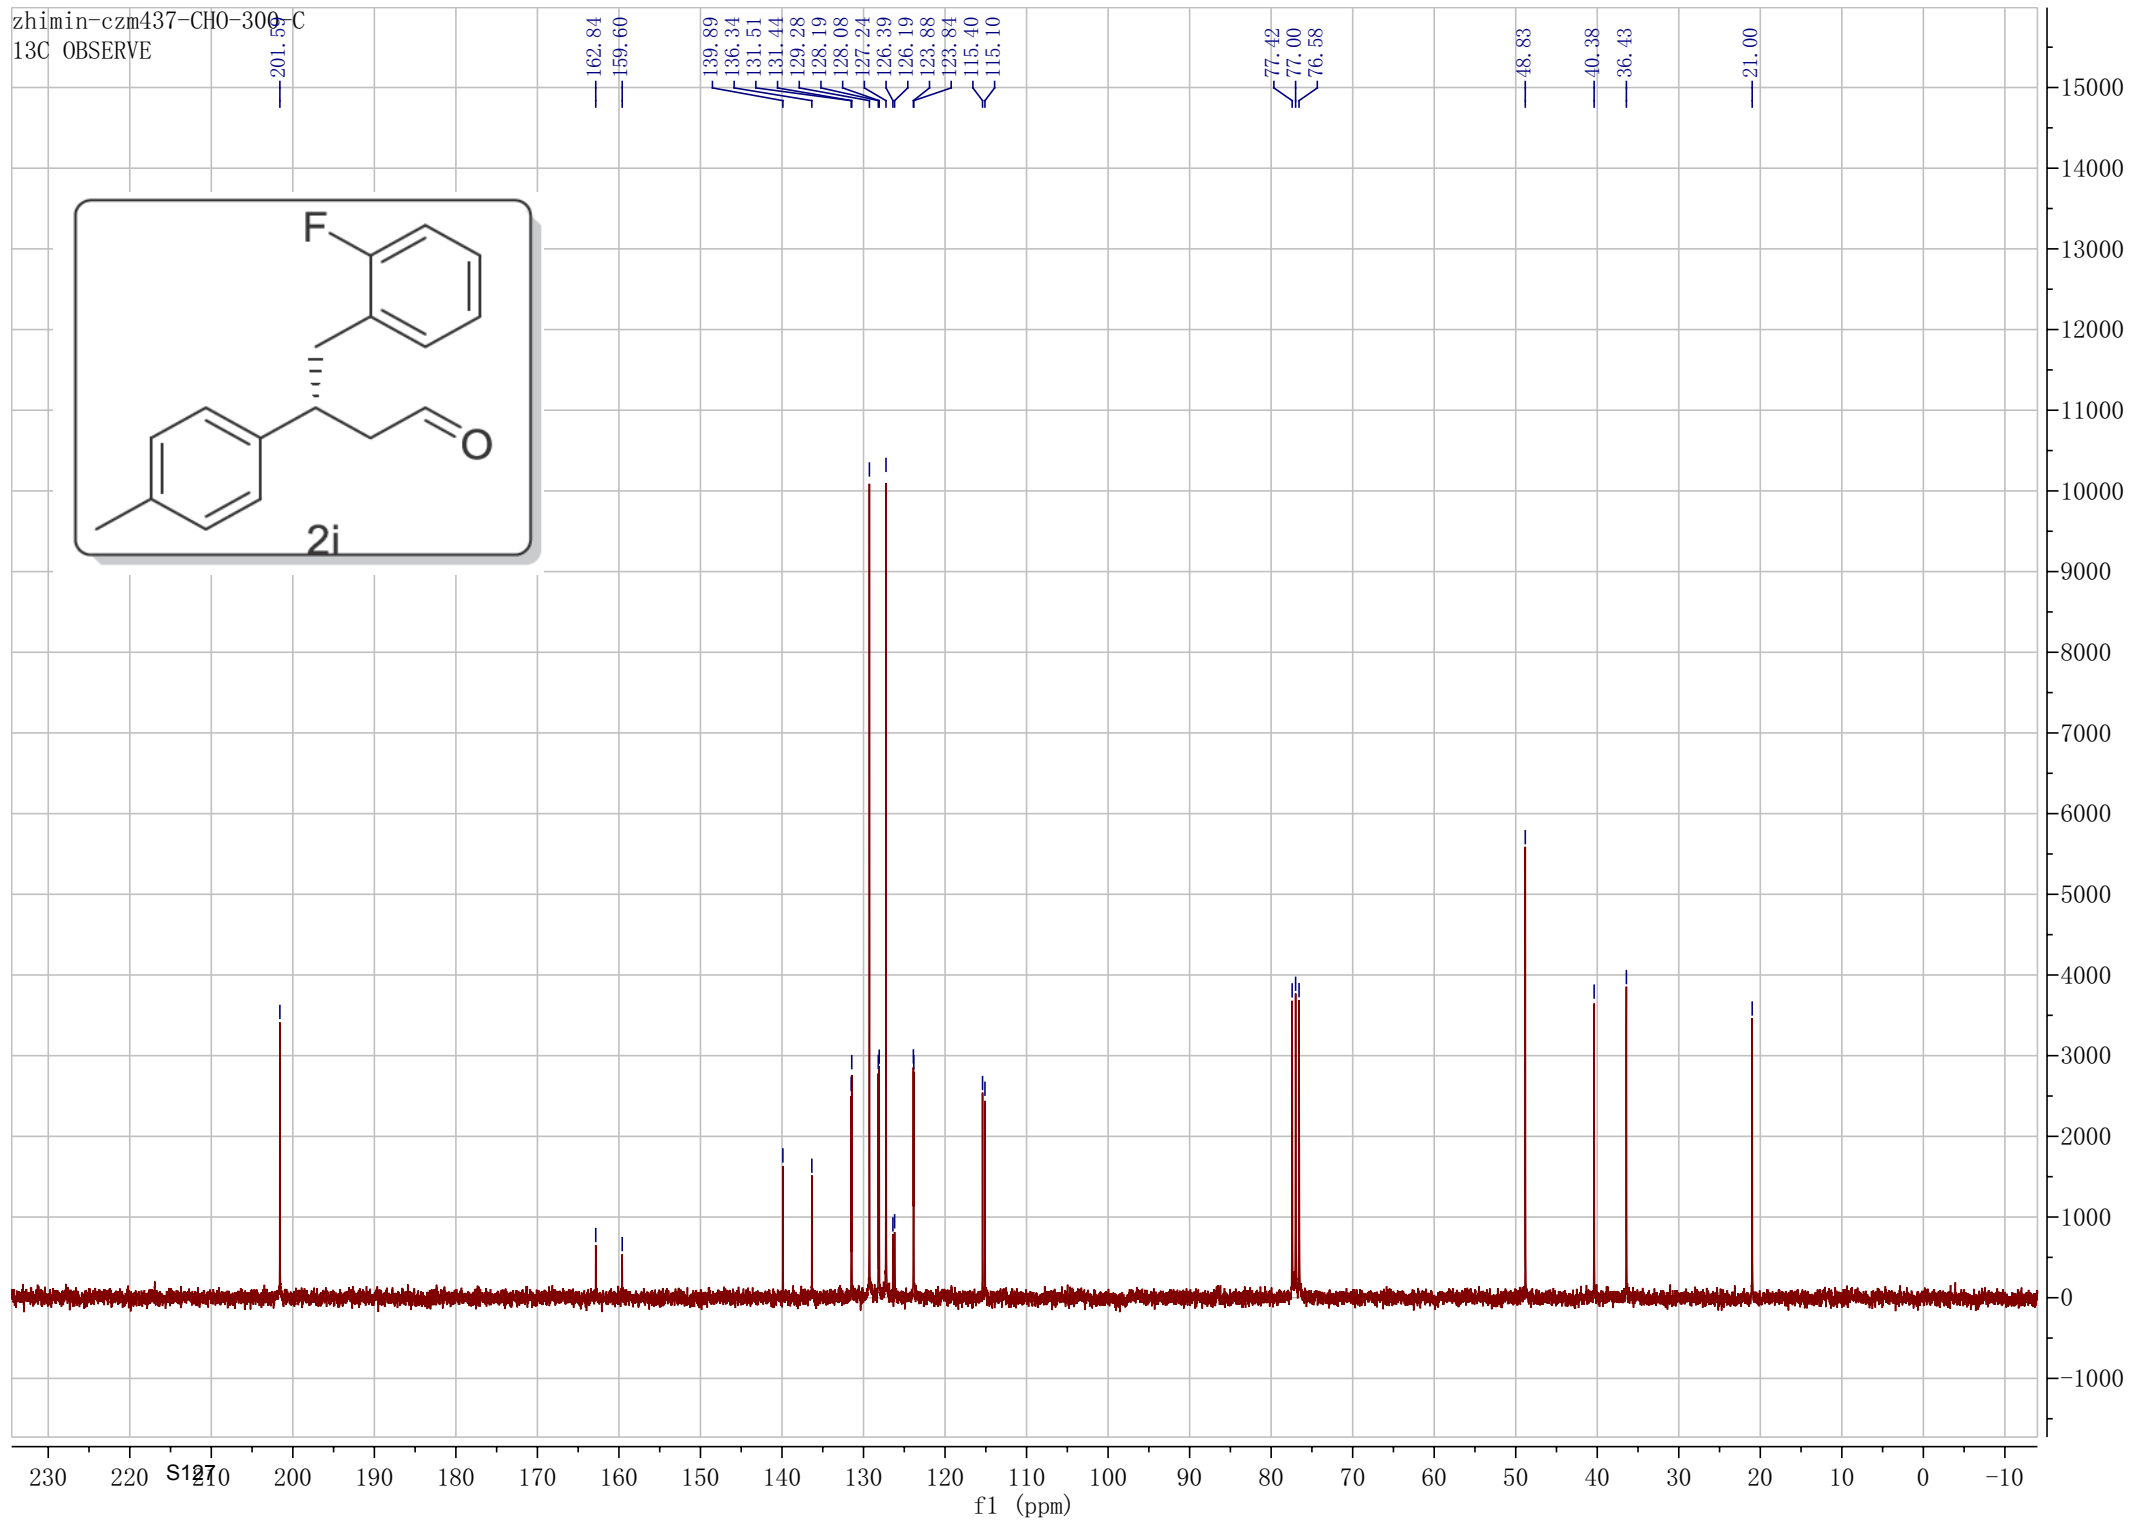

zhimin-czm437-CHO-300-F  
19F OBSERVE  
STANDARD PARAMETERS

-118.41  
-118.44

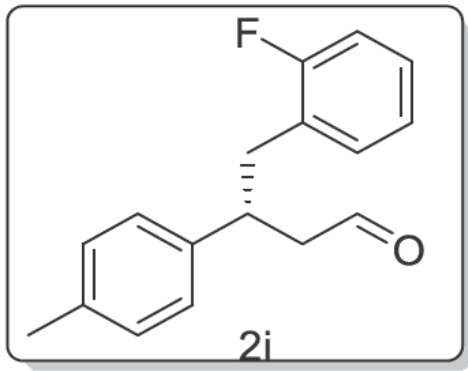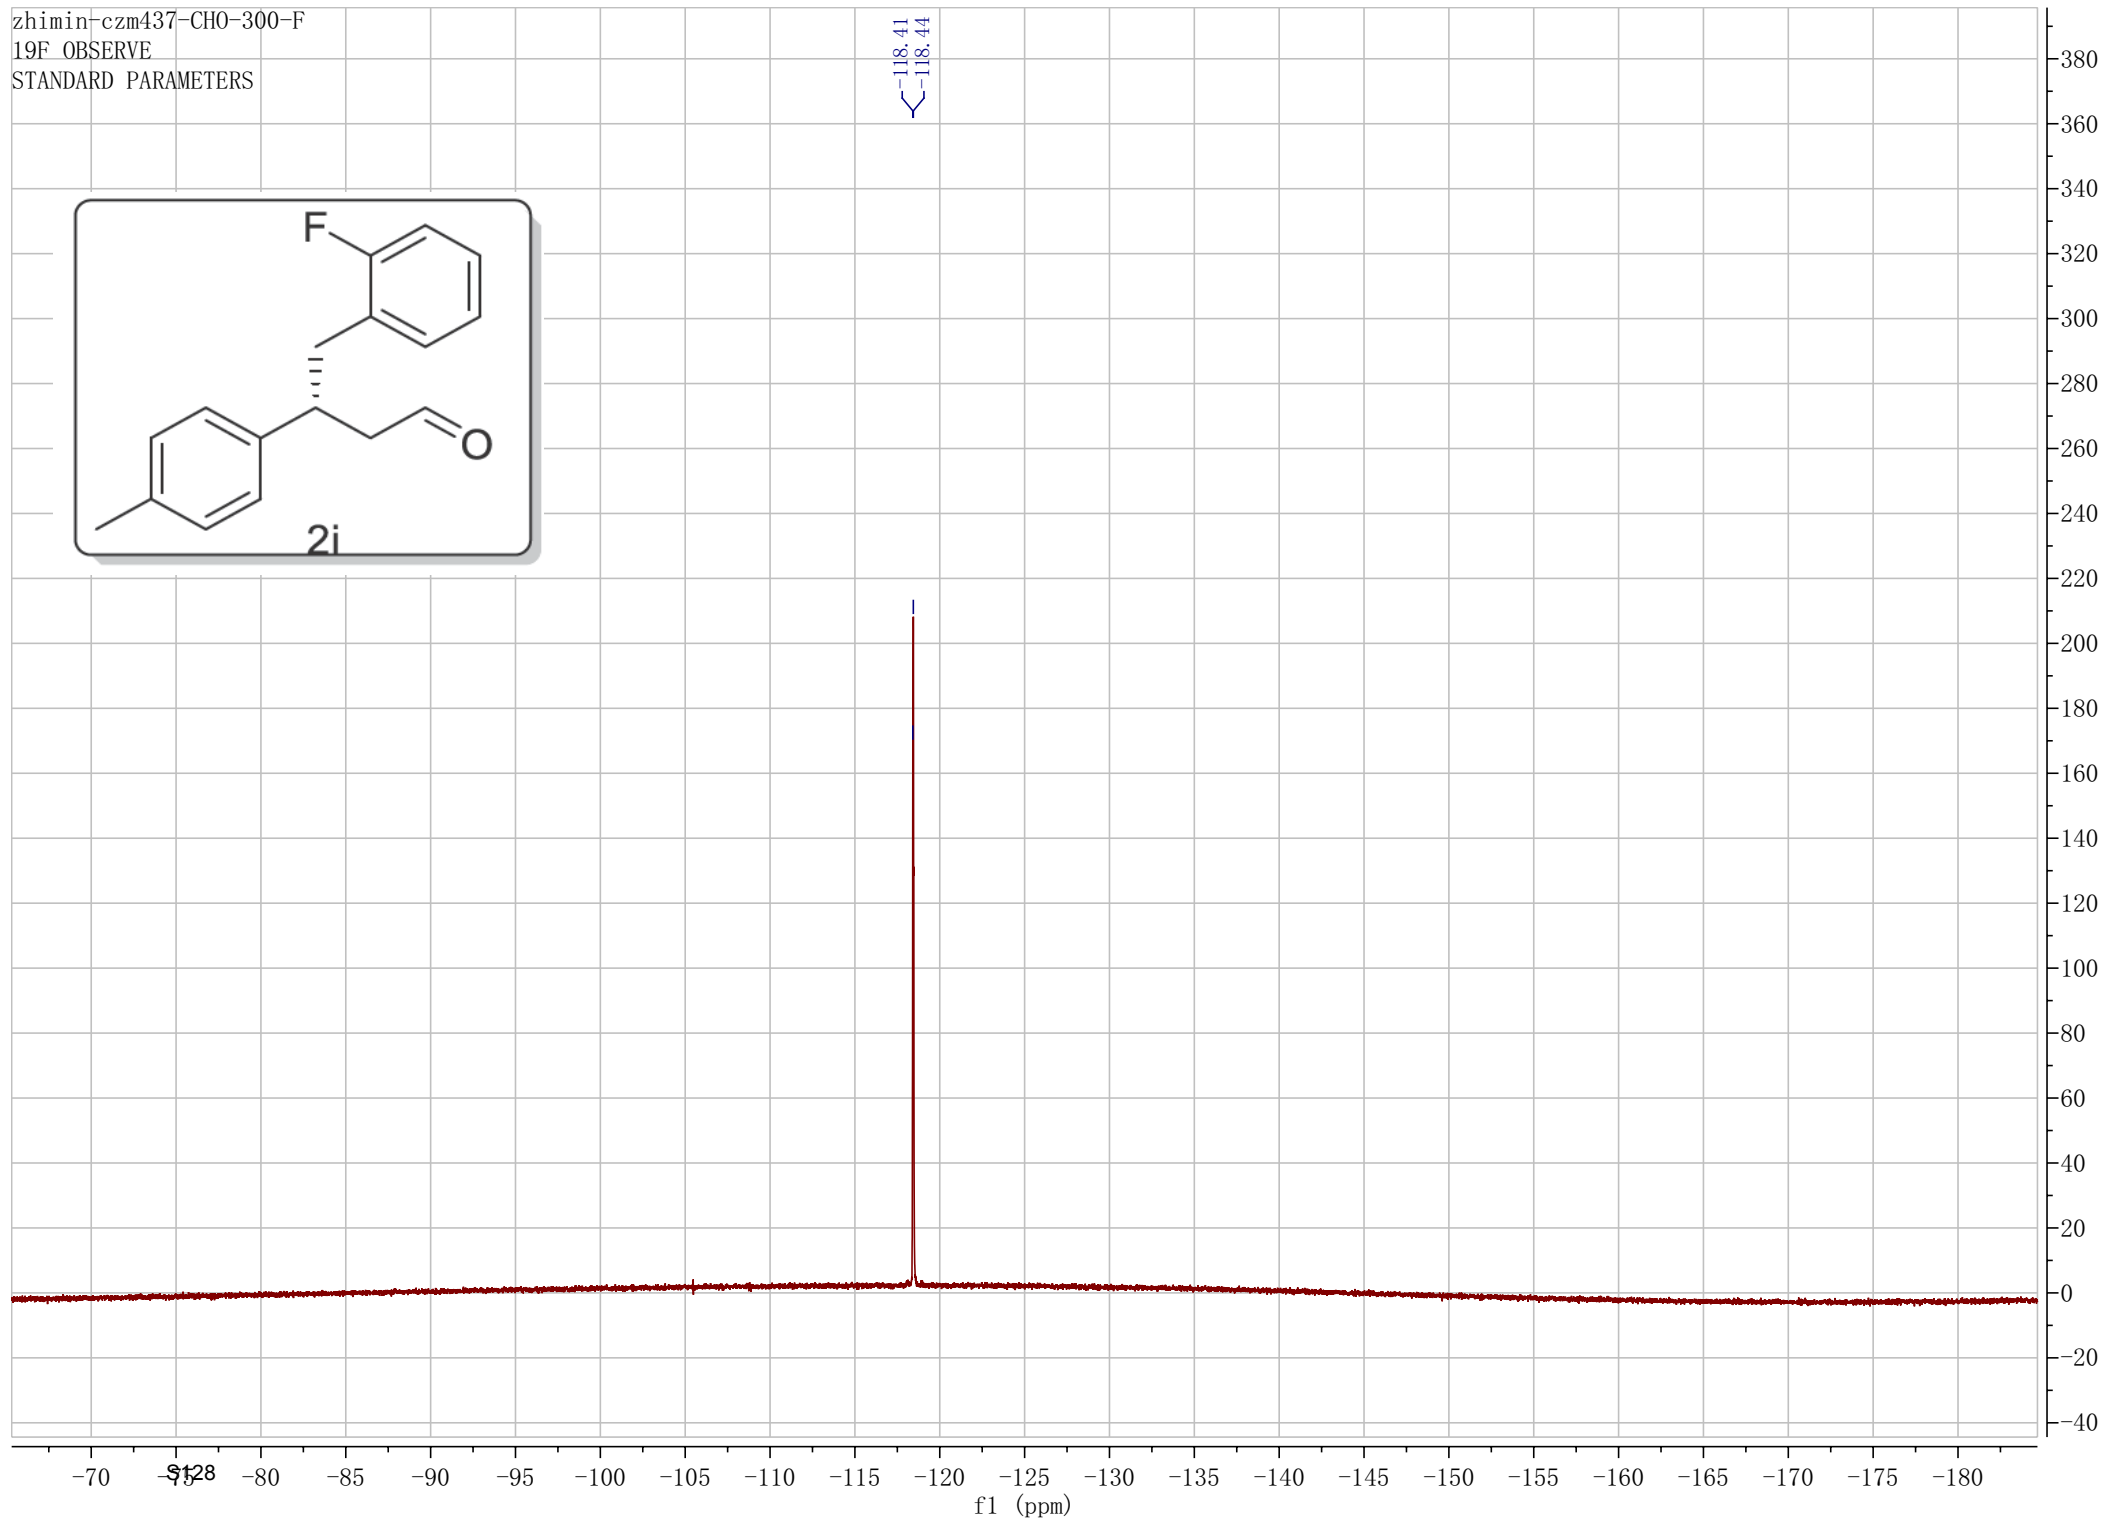

9128

f1 (ppm)

zhimin-czm300-OH-300-H  
UofUtah Unity300 NMR  
STANDARD 1H OBSERVE

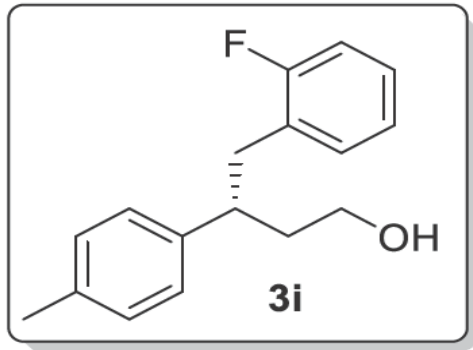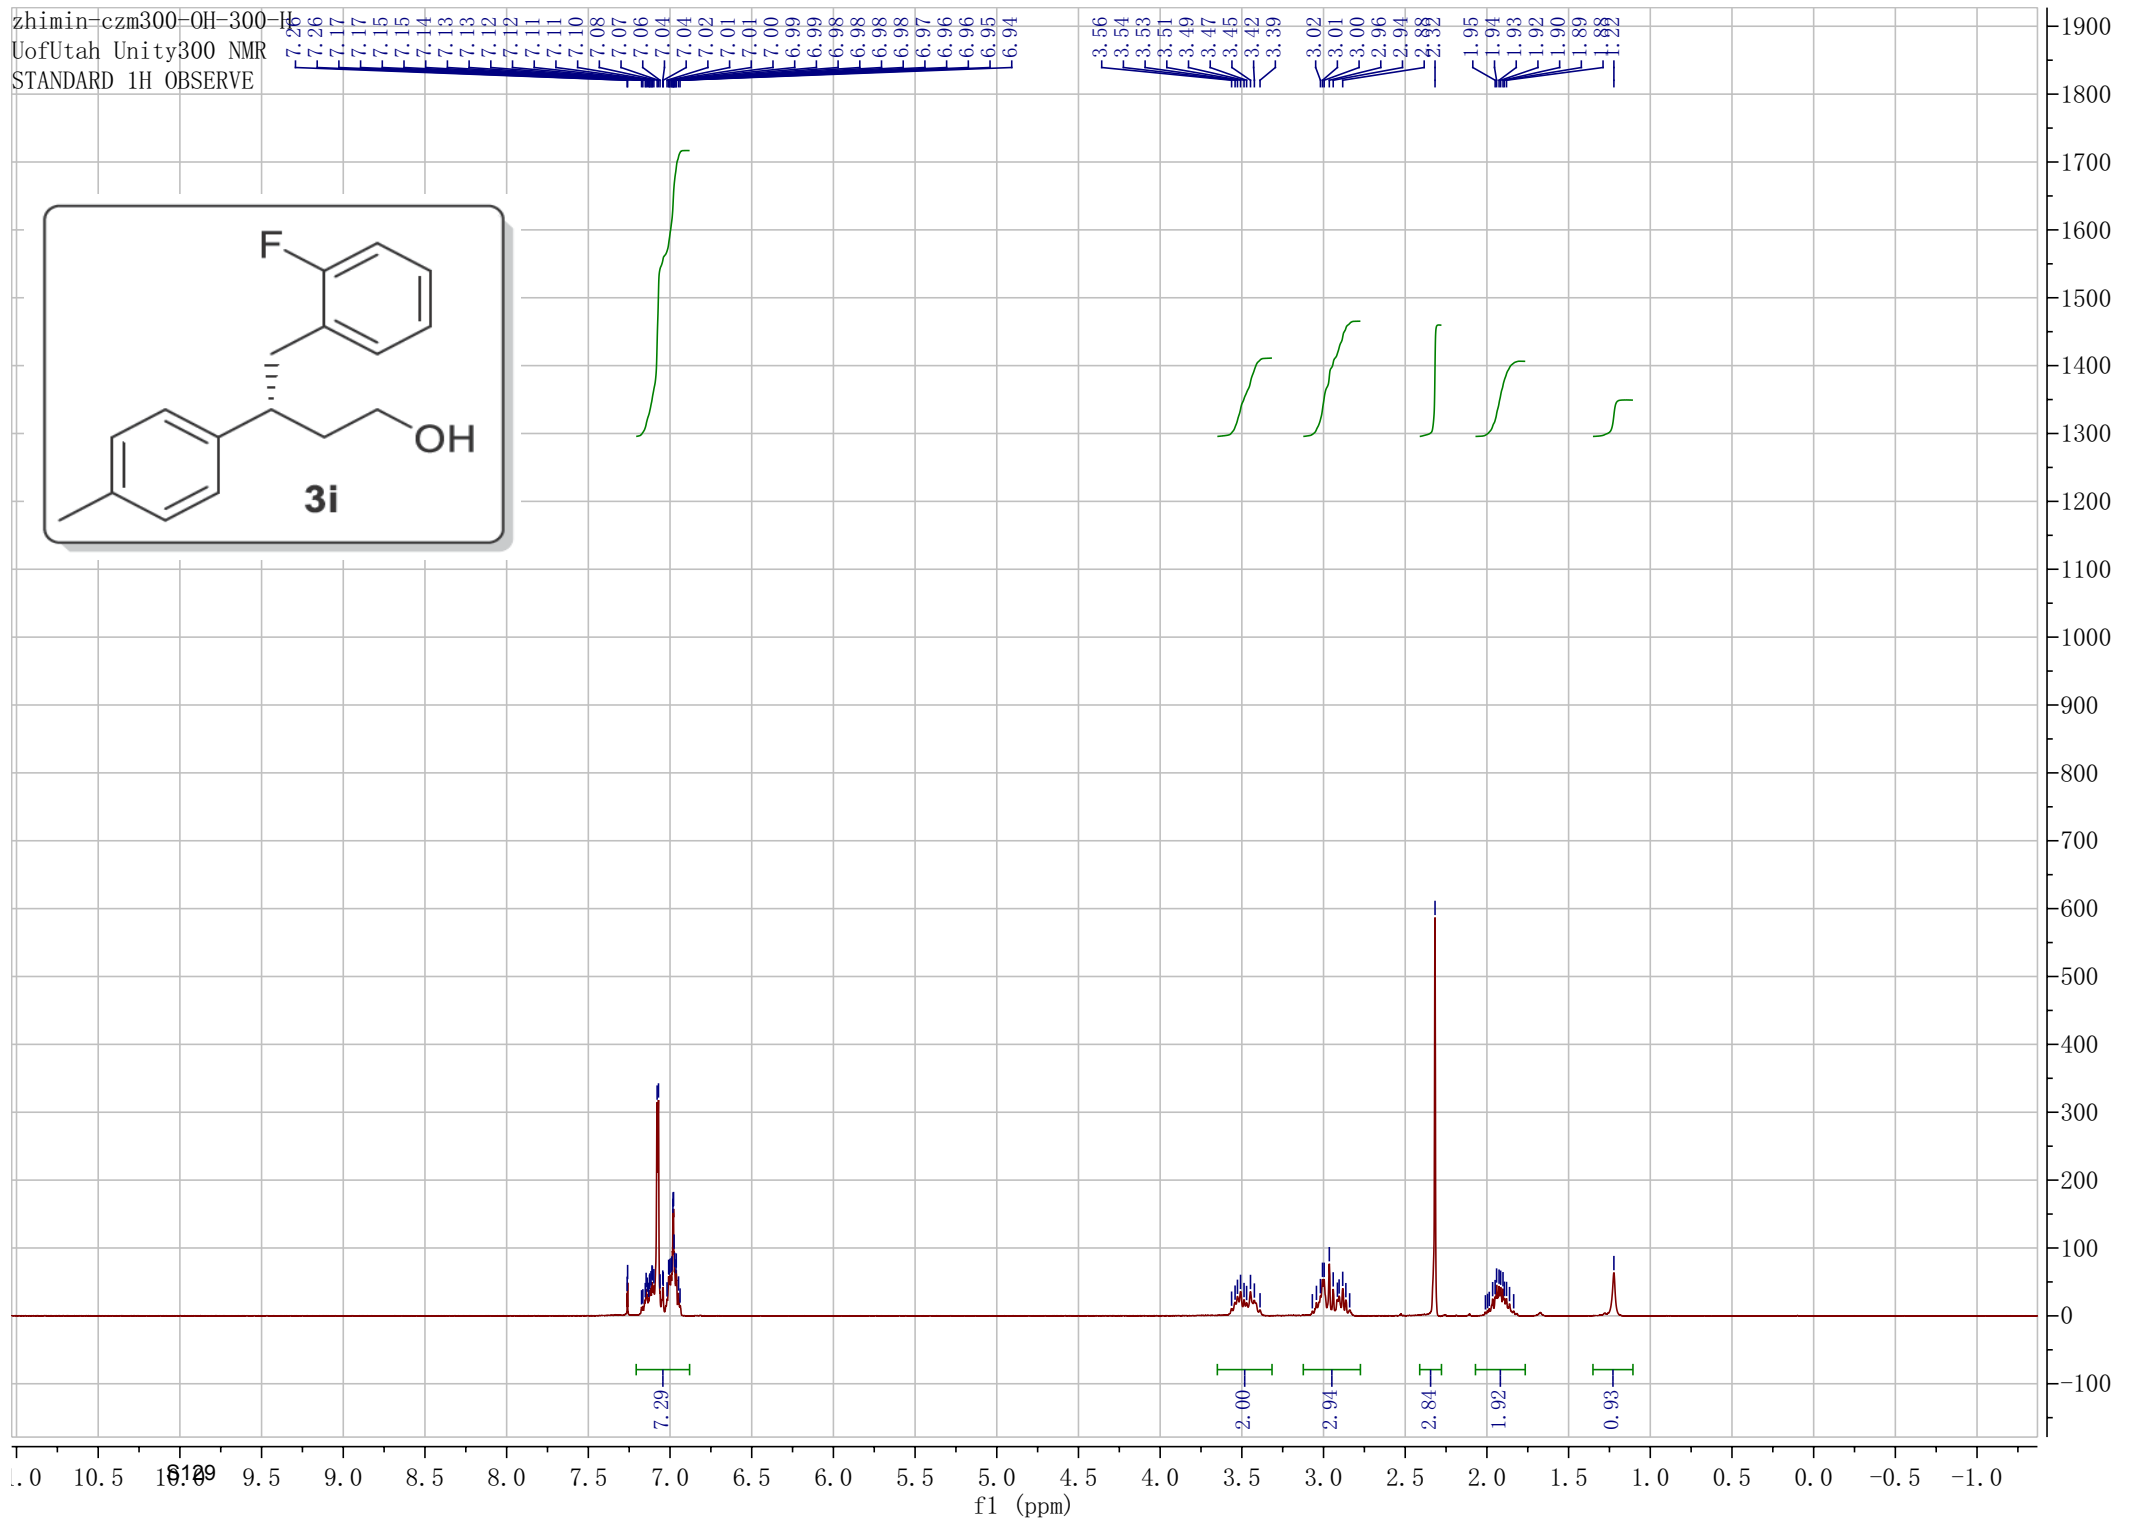

zhimin-czm300-OH-300-C  
13C OBSERVE

162.80  
159.56

140.92  
135.85  
131.45  
131.38  
129.10  
127.66  
127.55  
127.37  
123.64  
123.59  
113.20  
114.91

77.42  
77.00  
76.58

61.10

42.75  
38.04  
36.76  
36.75

21.00

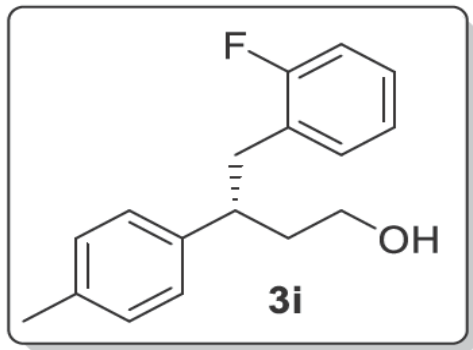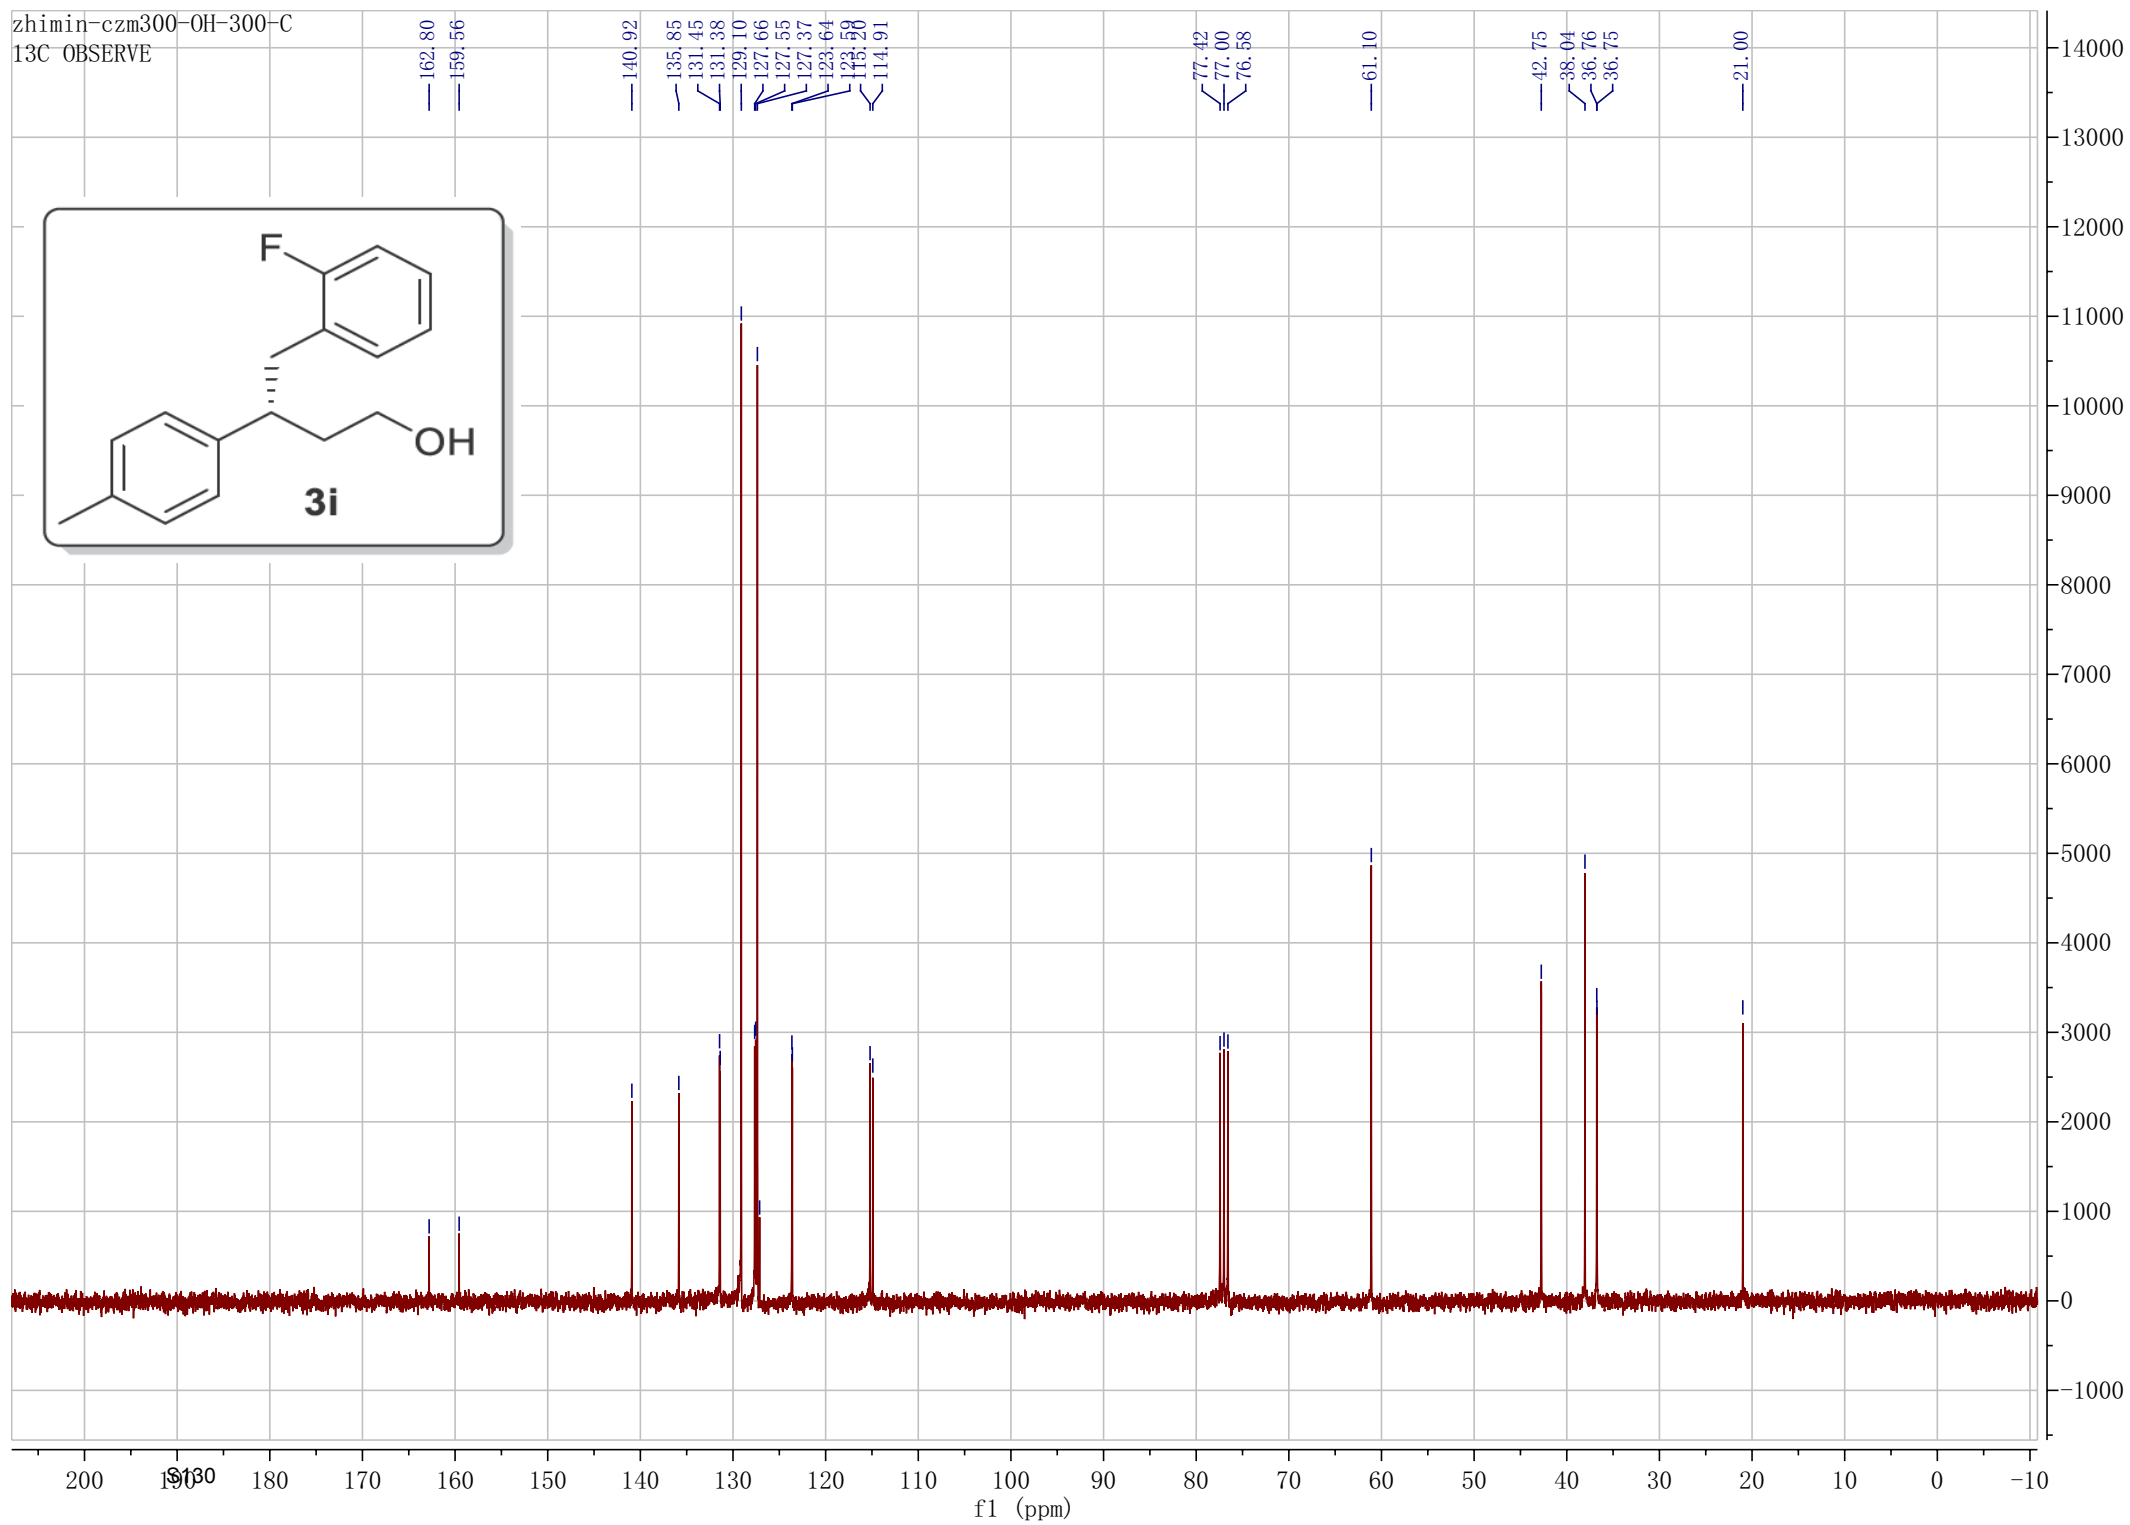



zhimin-czm300-OH-300-F  
19F OBSERVE  
STANDARD PARAMETERS



-118.56  
-118.58  
-118.60  
-118.61  
-118.64

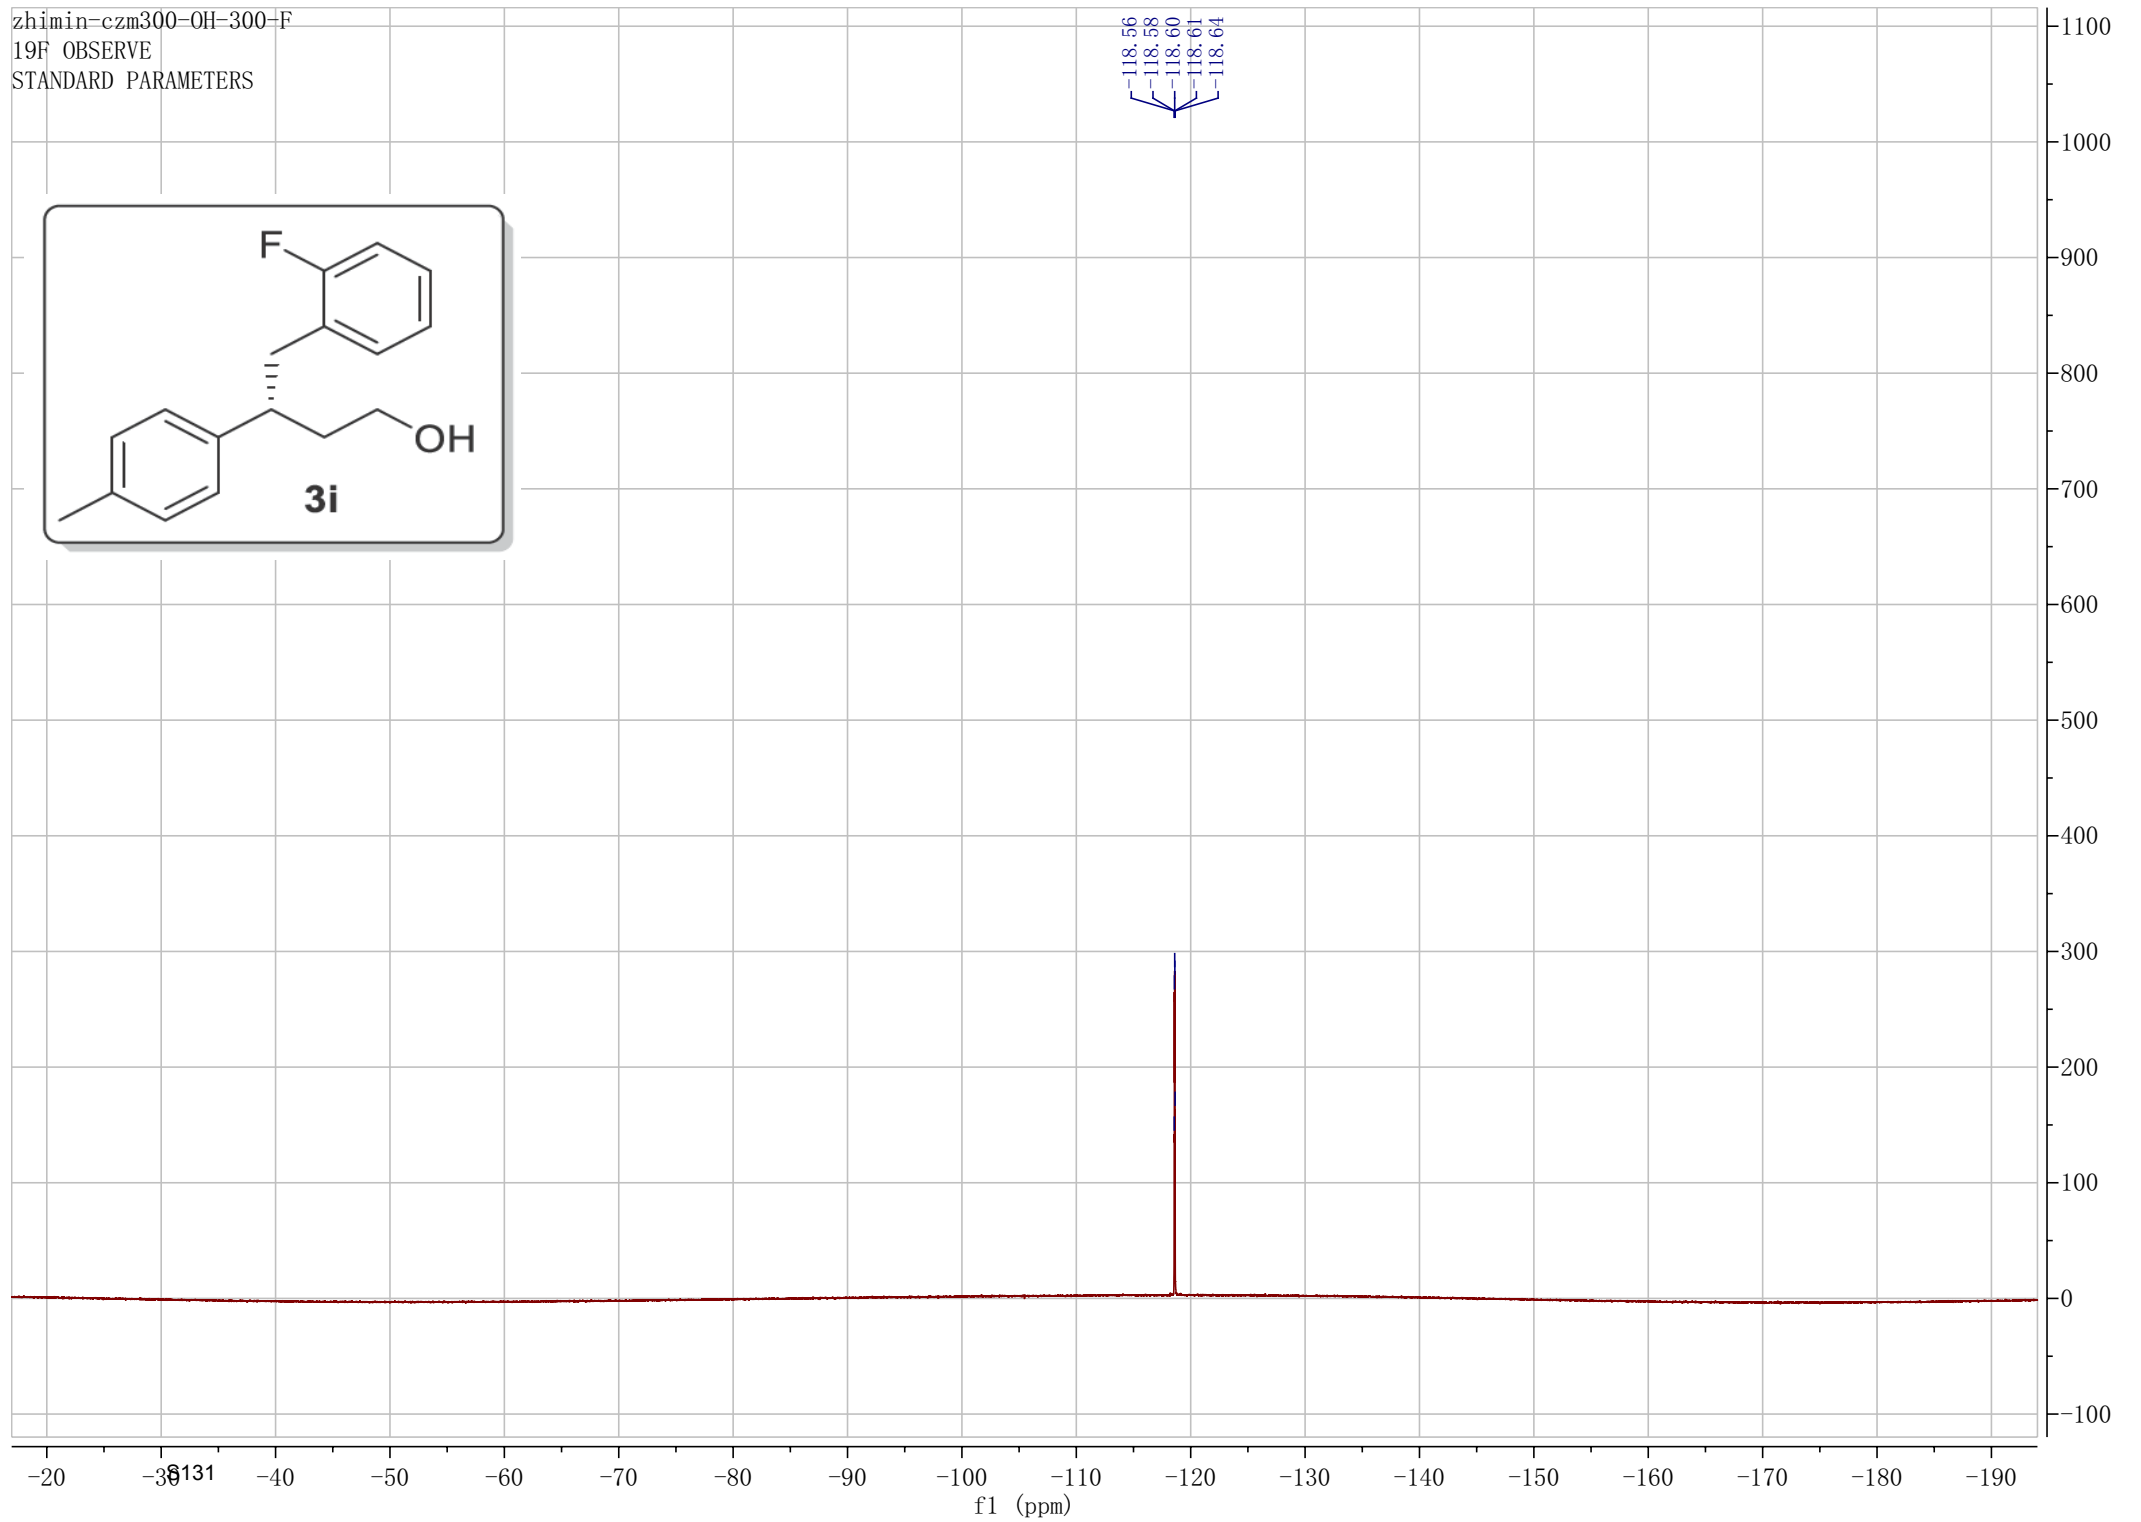

zhimin-czm303-CH0-300-H  
UofUtah Unity300 NMR  
STANDARD 1H OBSERVE

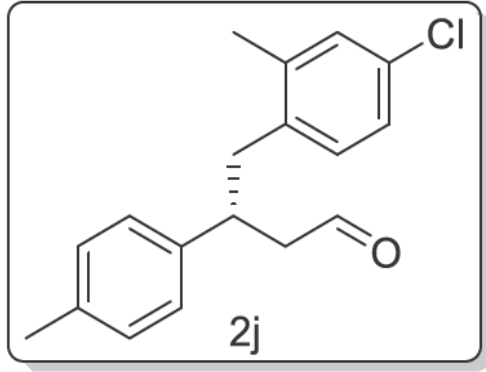

7.26  
7.26  
7.25  
7.10  
7.07  
7.02  
7.01  
6.99  
6.86  
6.85  
6.84  
6.82

3.41  
3.39  
3.36  
3.34  
2.85  
2.84  
2.83  
2.78  
2.77  
2.49  
2.41  
2.21

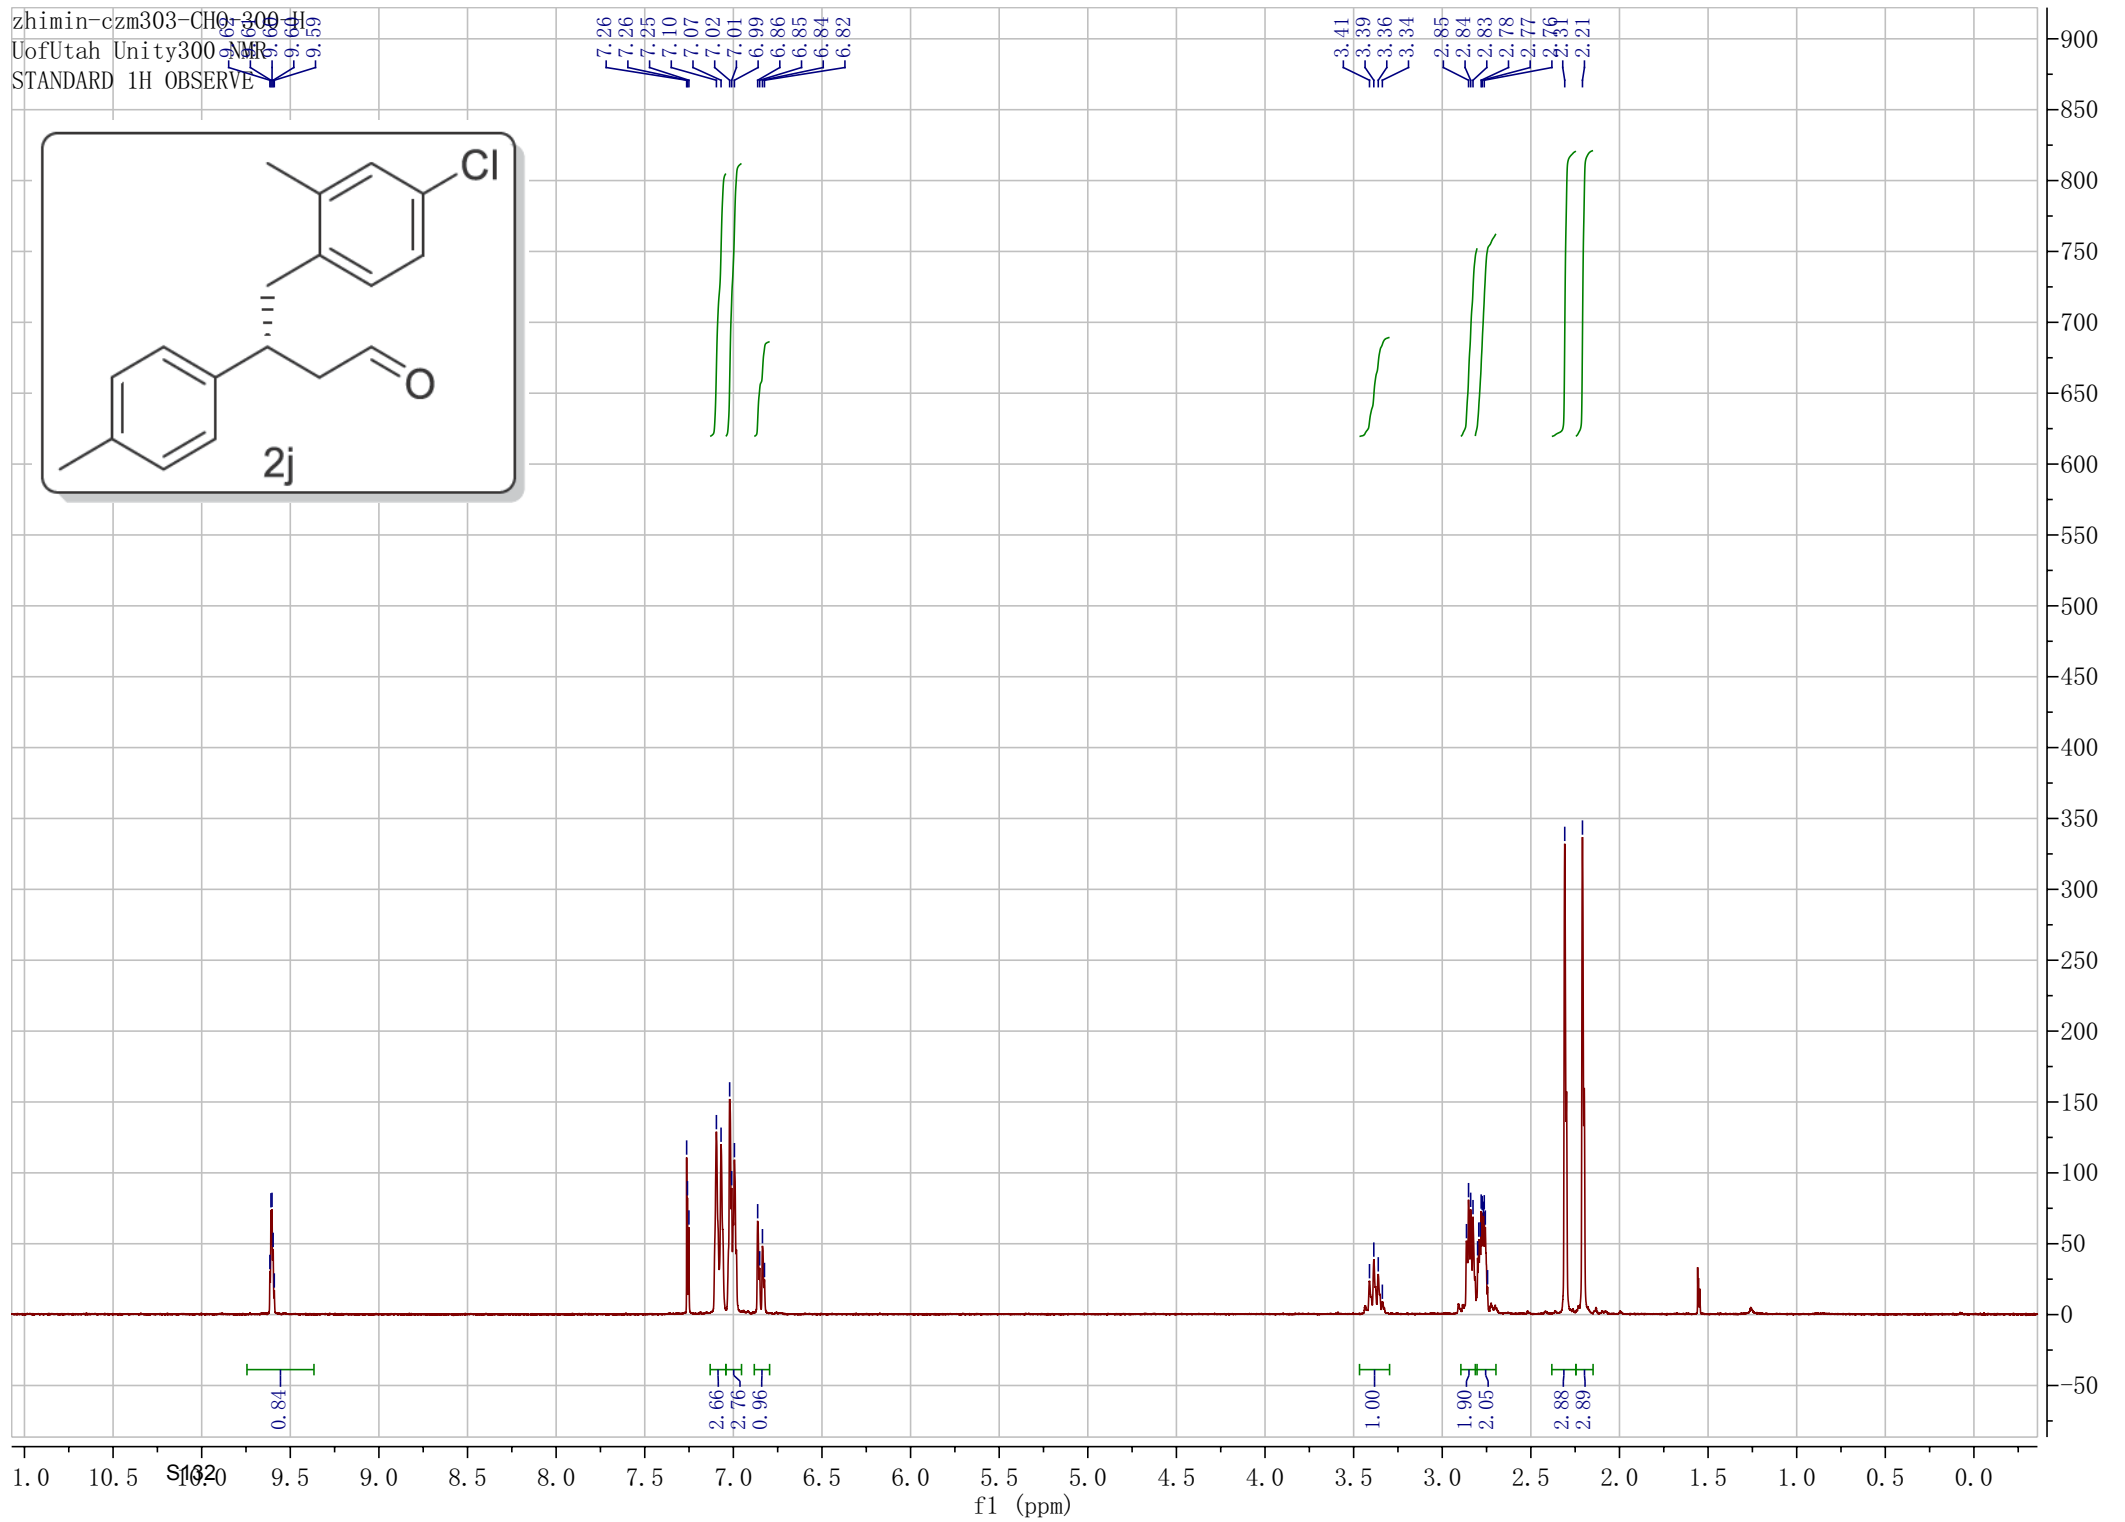

zhimin-ozm303-CHO-C  
STANDARD CARBON PARAMETERS

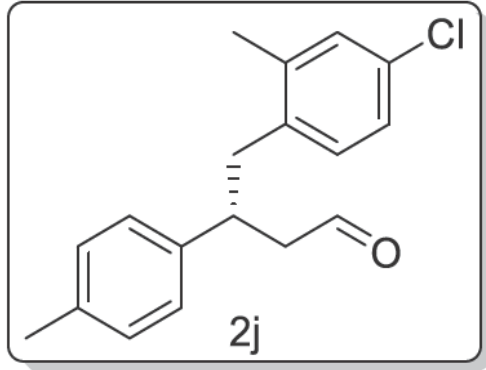

139.89  
138.25  
136.42  
136.16  
131.80  
131.30  
130.11  
129.32  
127.25  
125.72

77.25  
77.00  
76.75

49.11

40.29  
40.10

20.99  
19.31

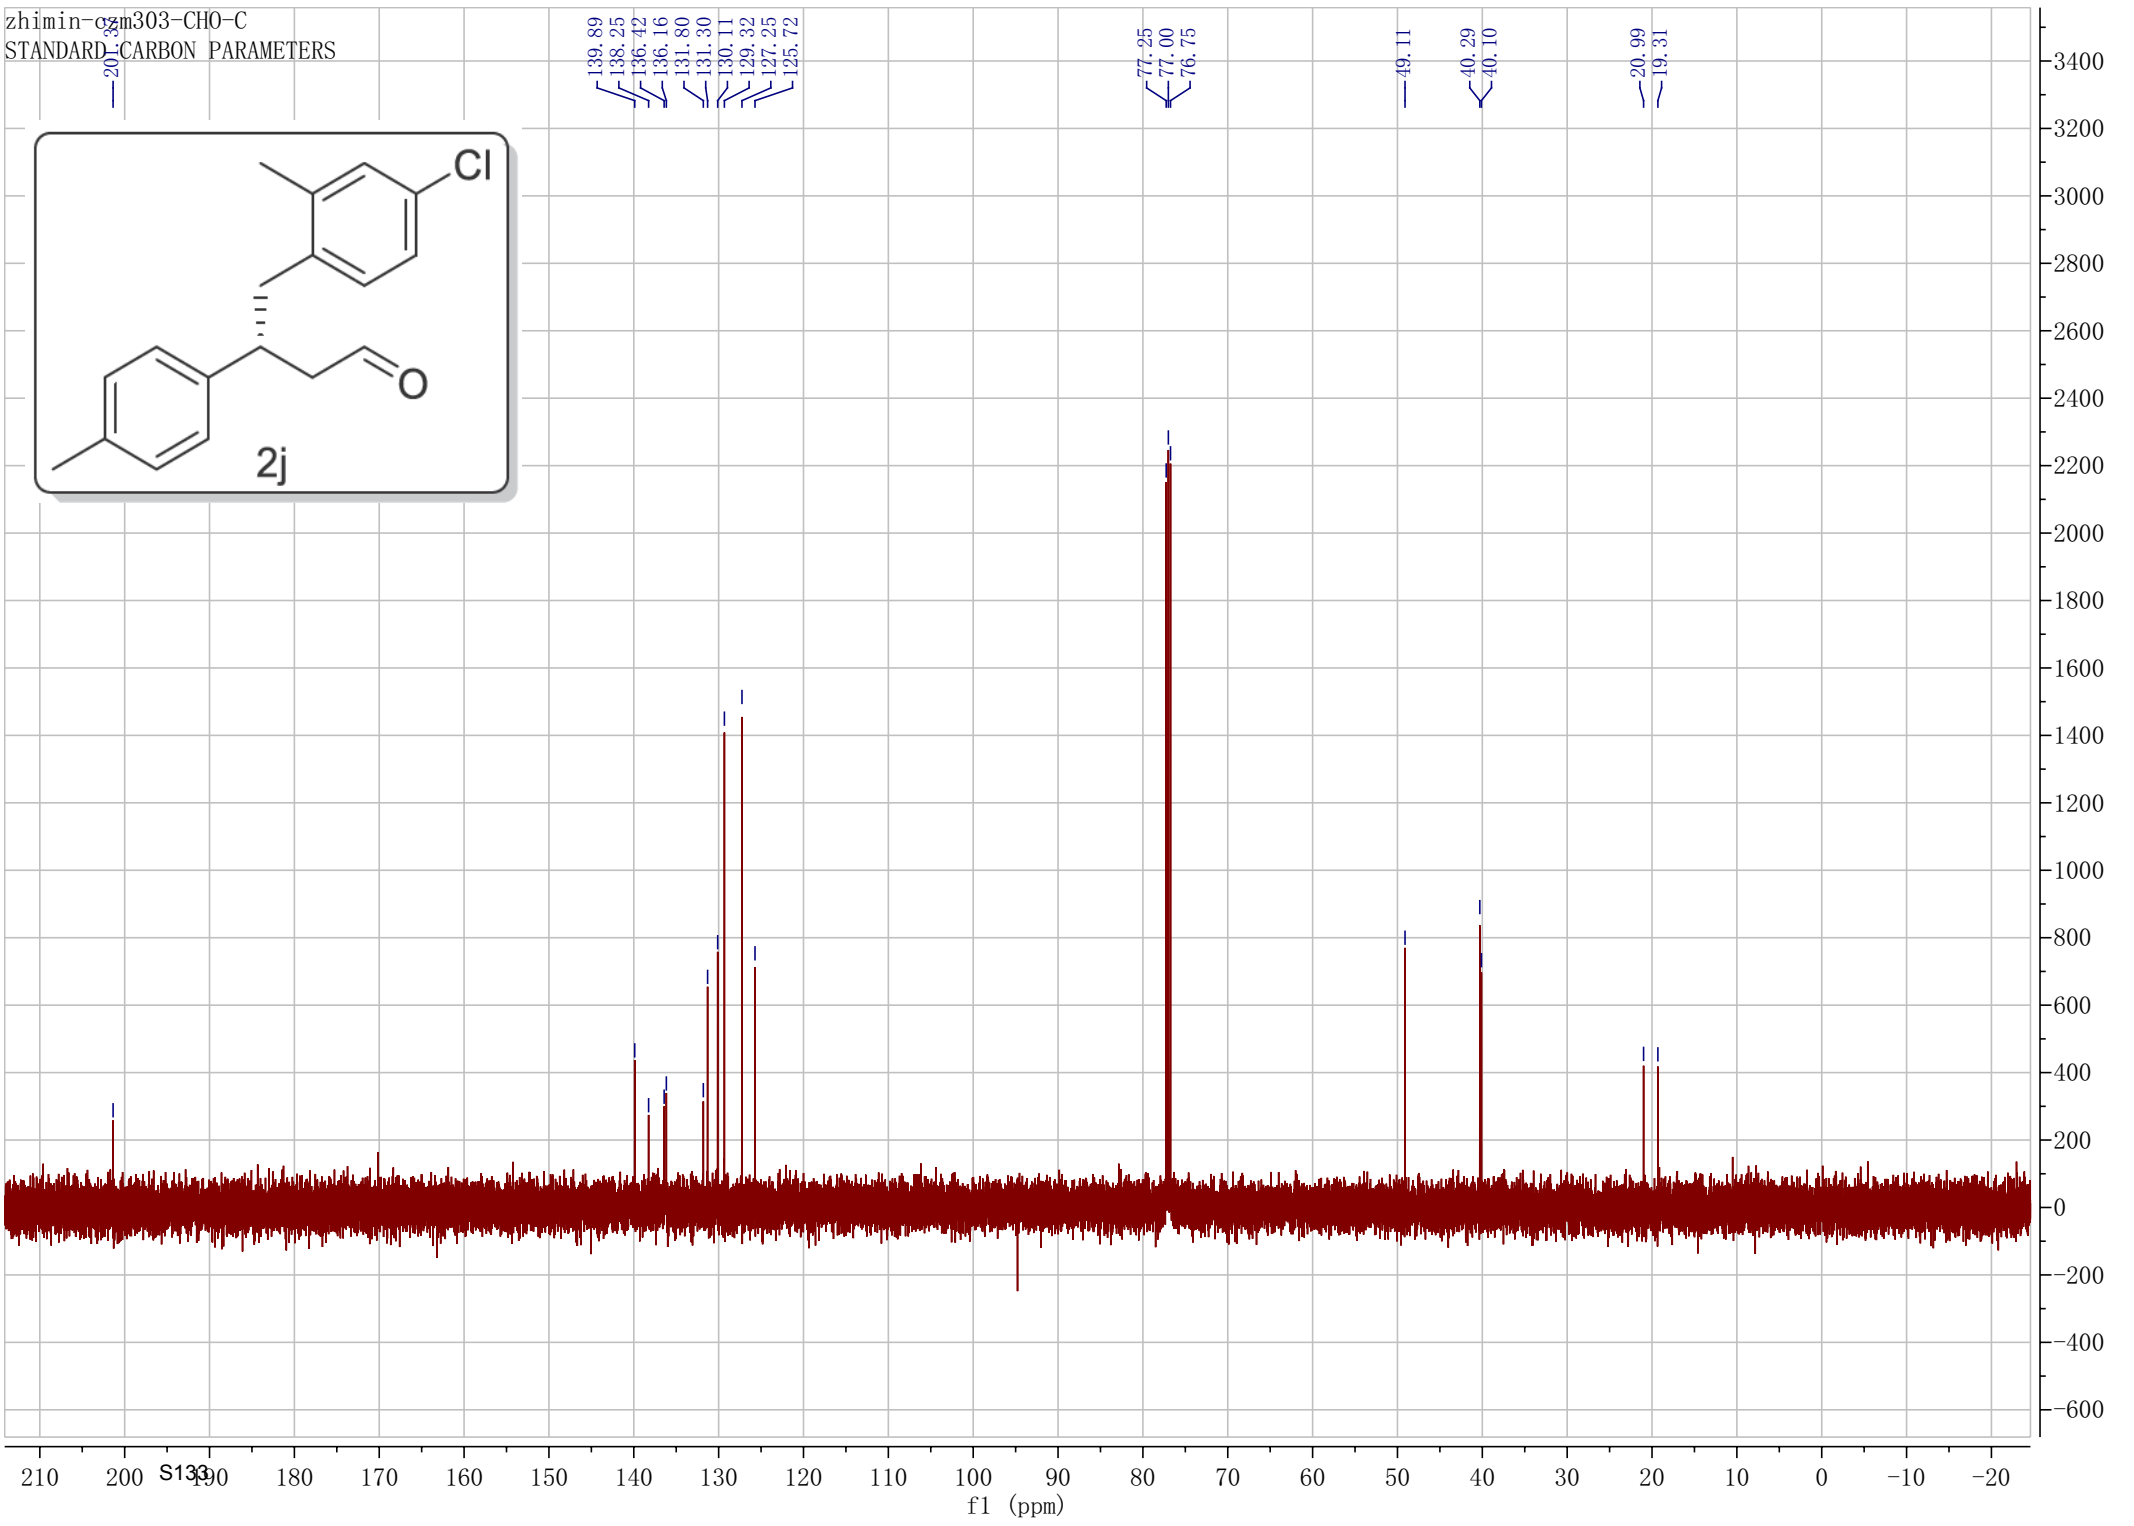

zhimin-czm303-OH-300-H  
UofUtah Unity300 NMR  
STANDARD 1H OBSERVE

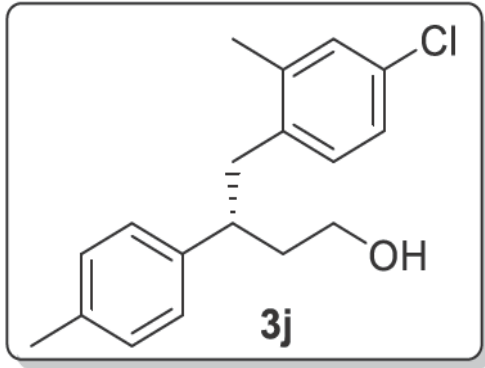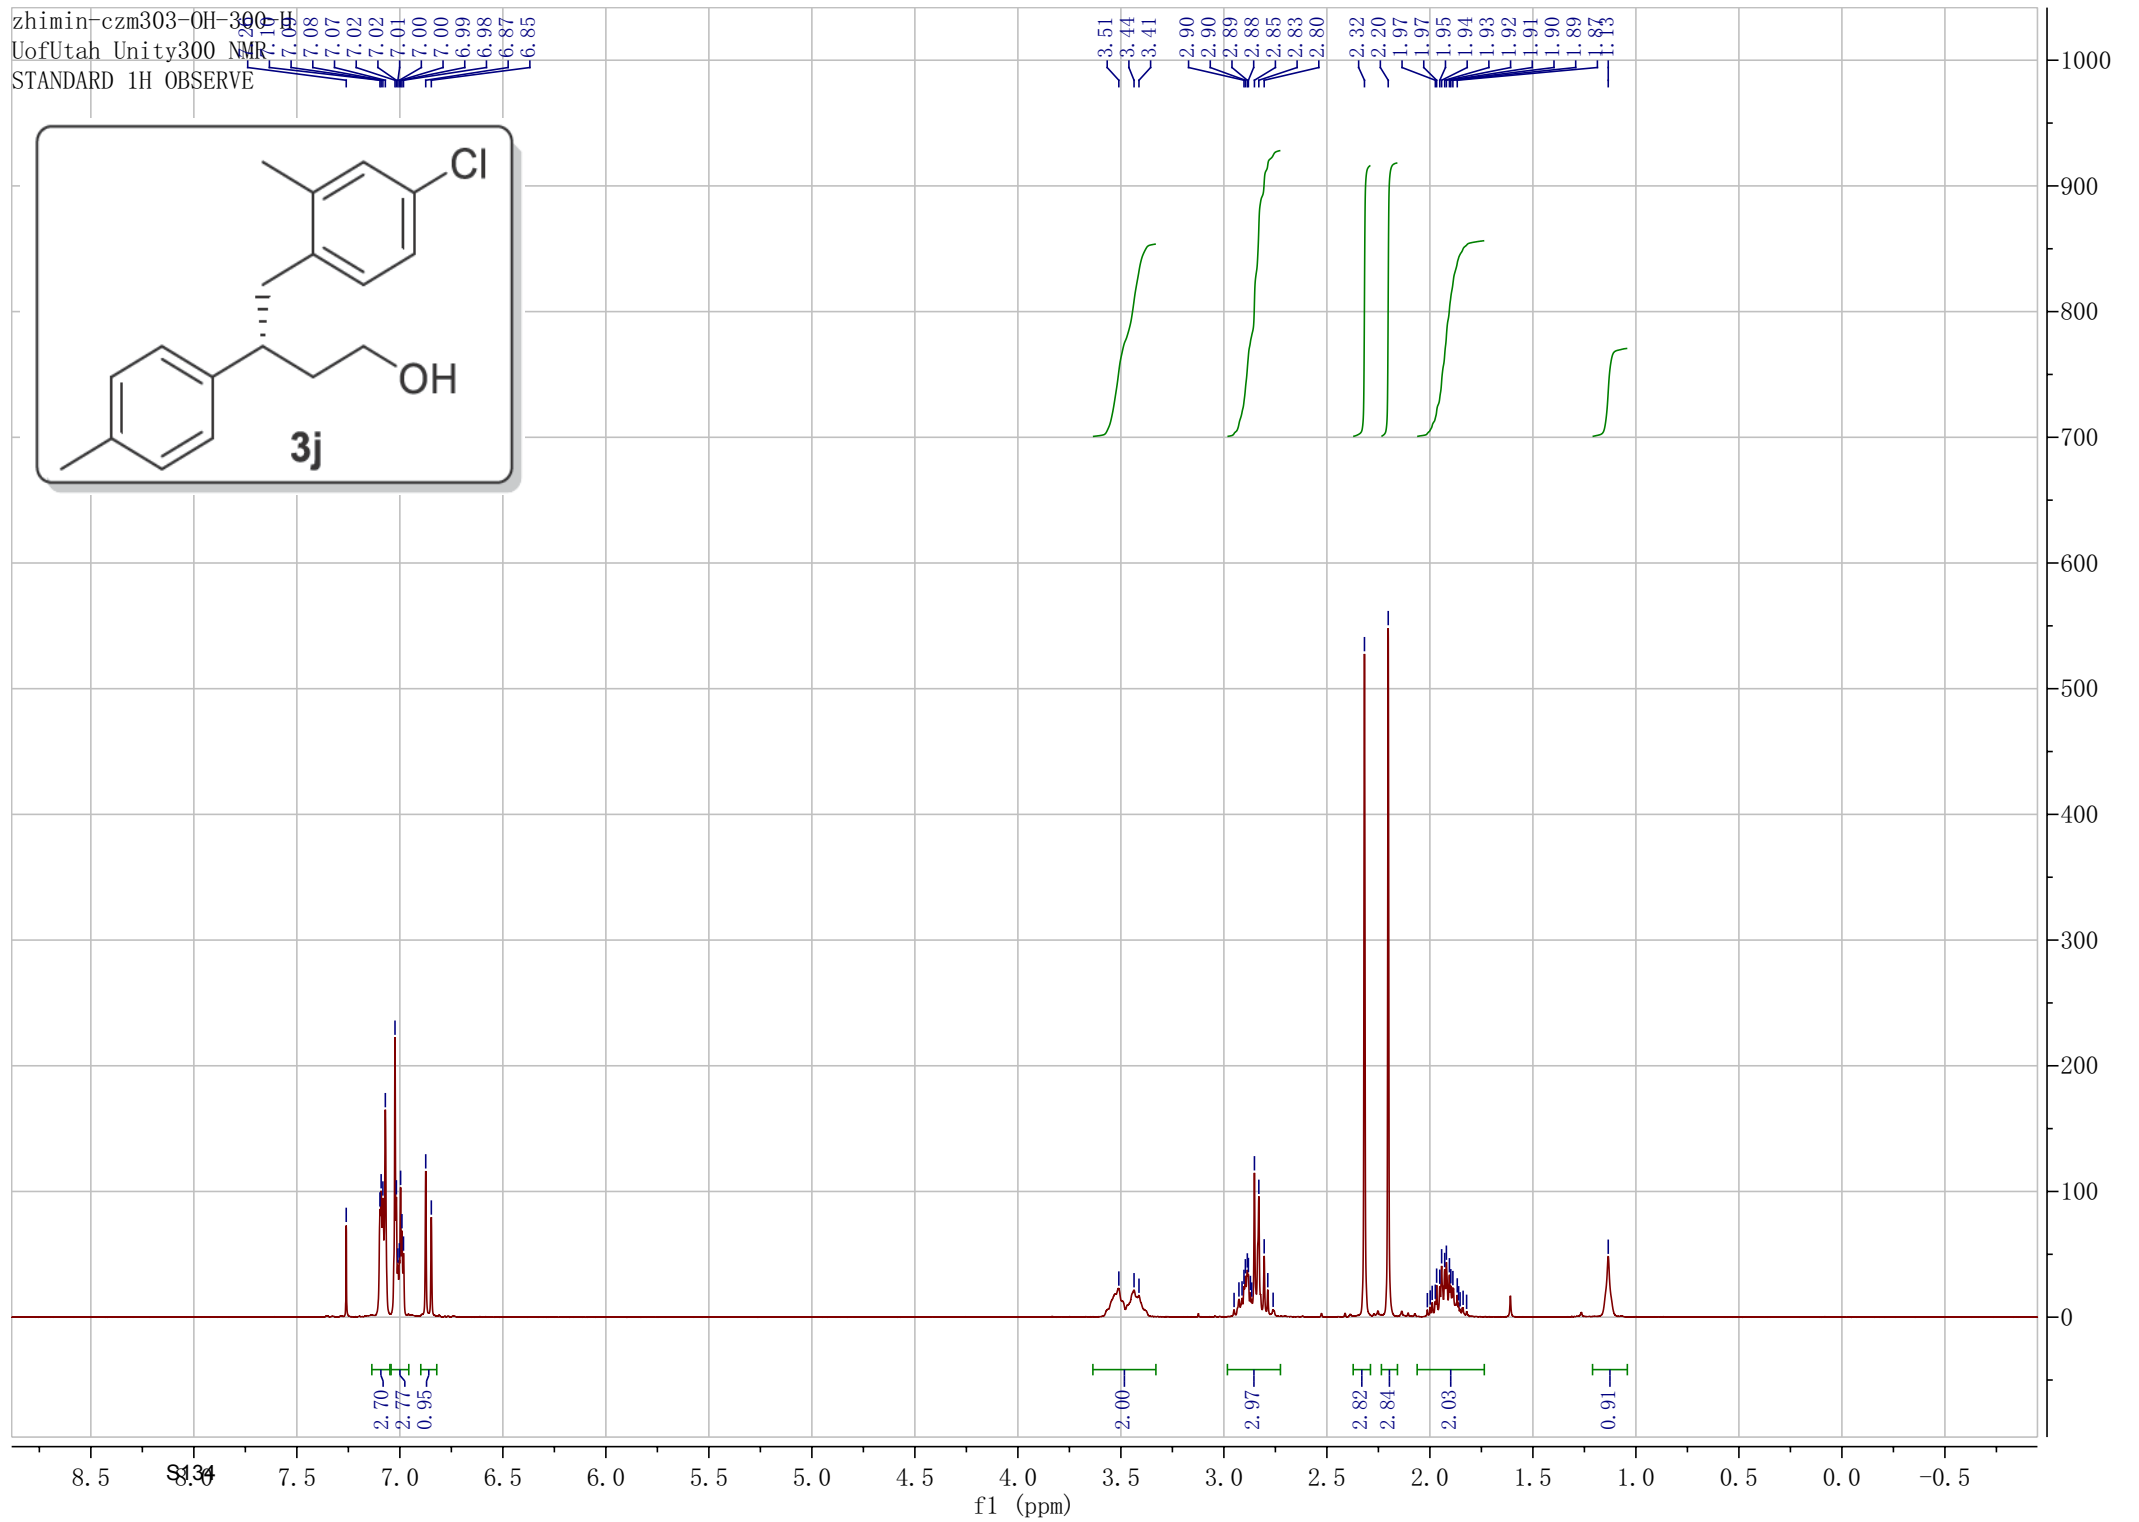

zhimin-czm303-OH-300-C  
13C OBSERVE

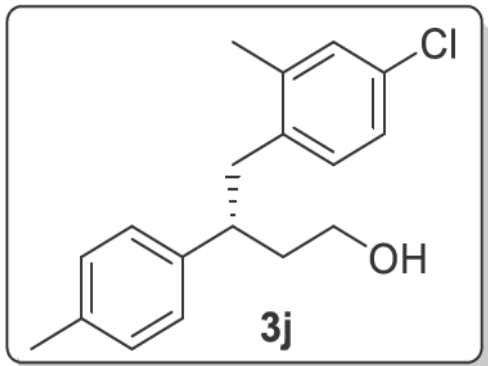

140.92  
138.08  
137.09  
135.96  
131.30  
131.22  
129.88  
129.18  
127.37  
125.52

77.42  
77.00  
76.58

61.08

42.75  
40.57  
38.06

21.01  
19.39

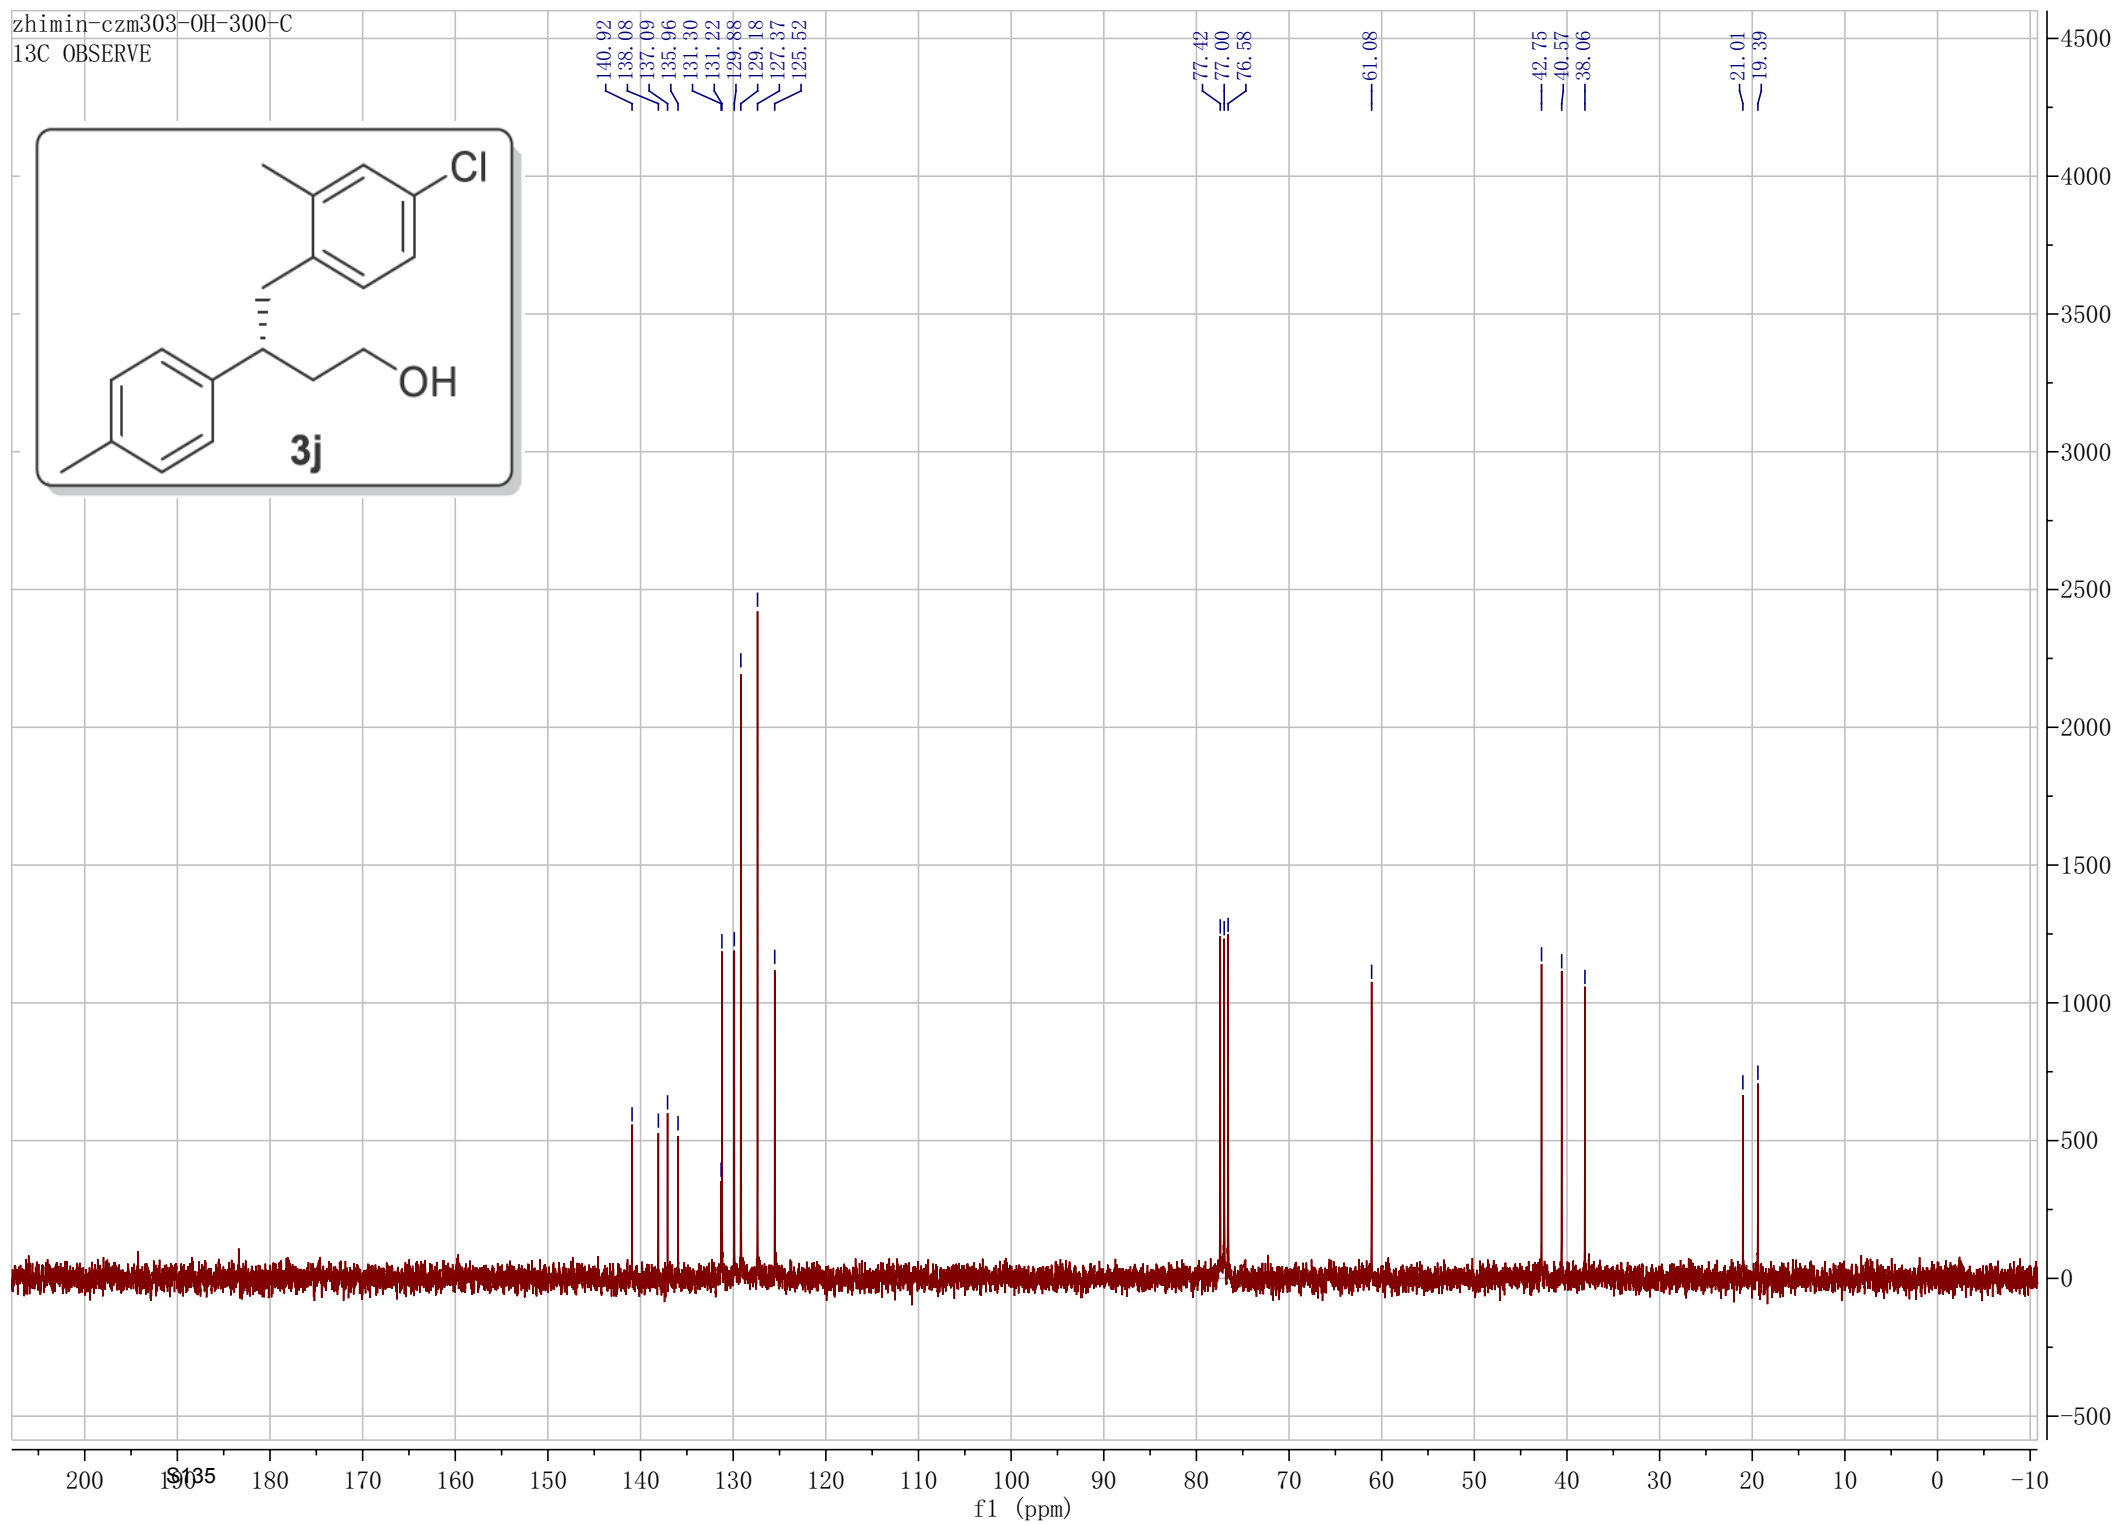

zhimin-czm315-CHO-500-H1  
STANDARD PROTON PARAMETERS

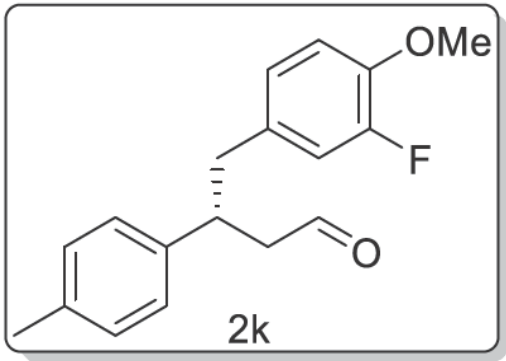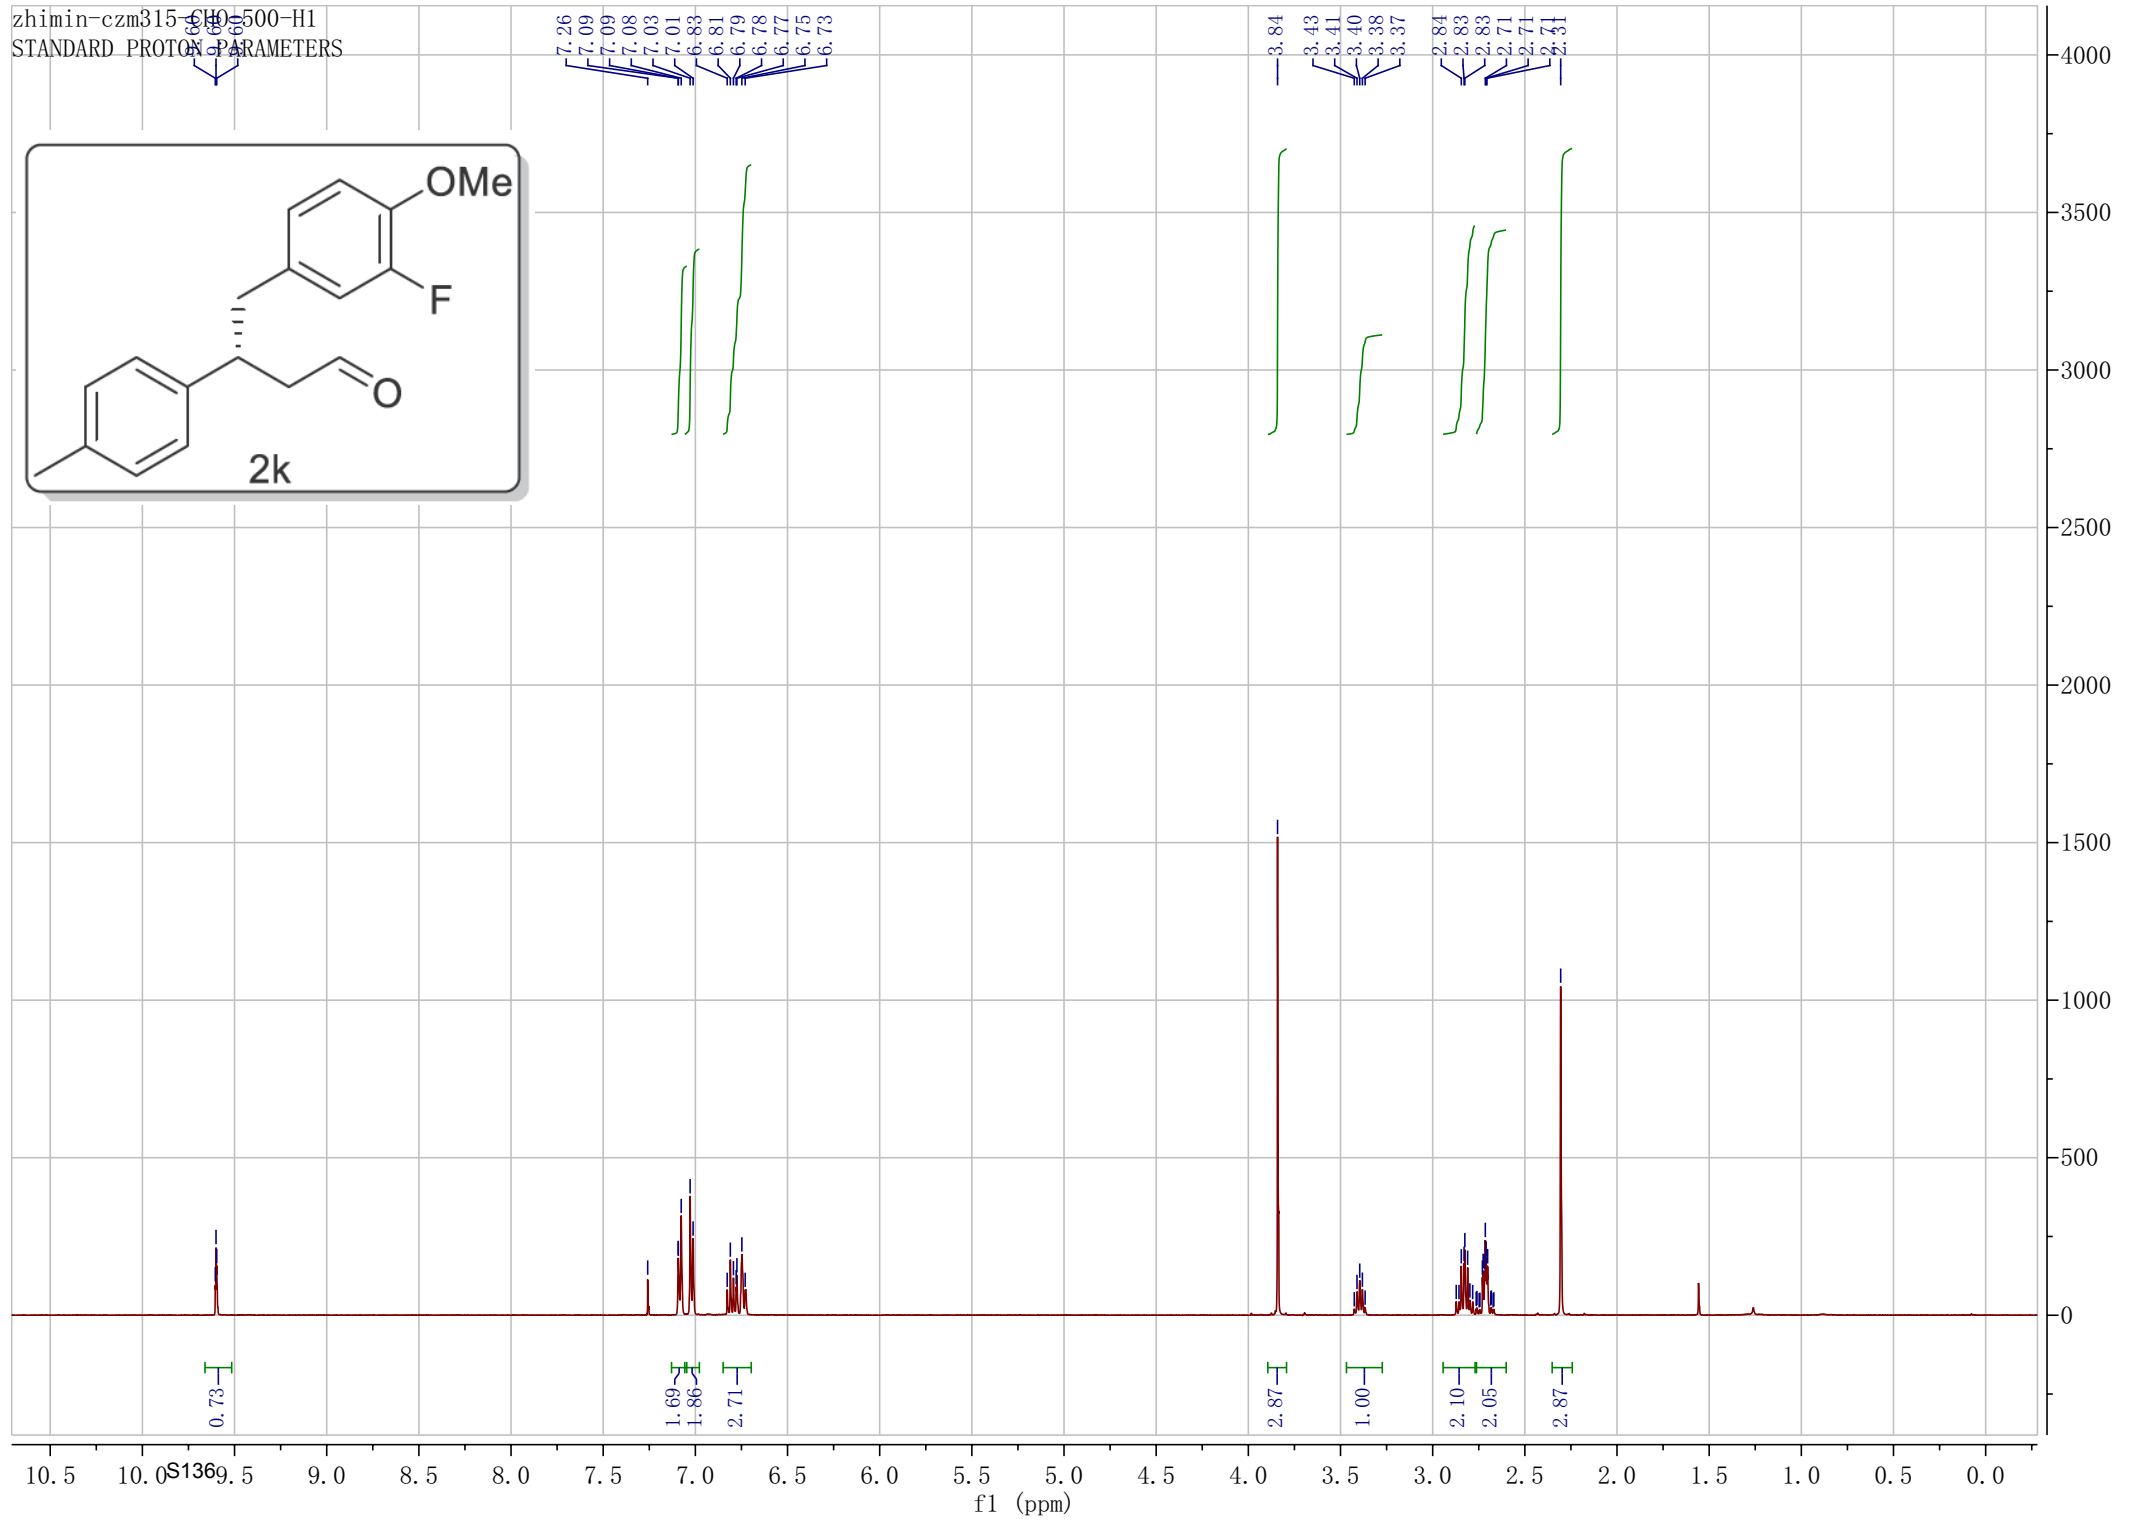

zhimin-czm315-CHO-300-C  
13C OBSERVE

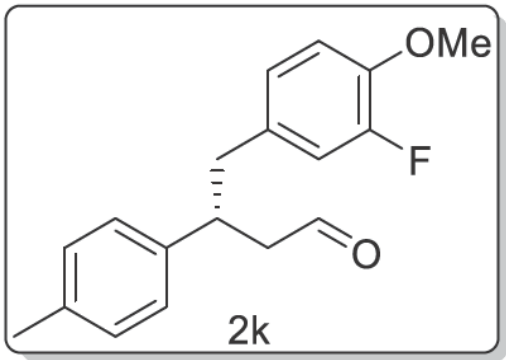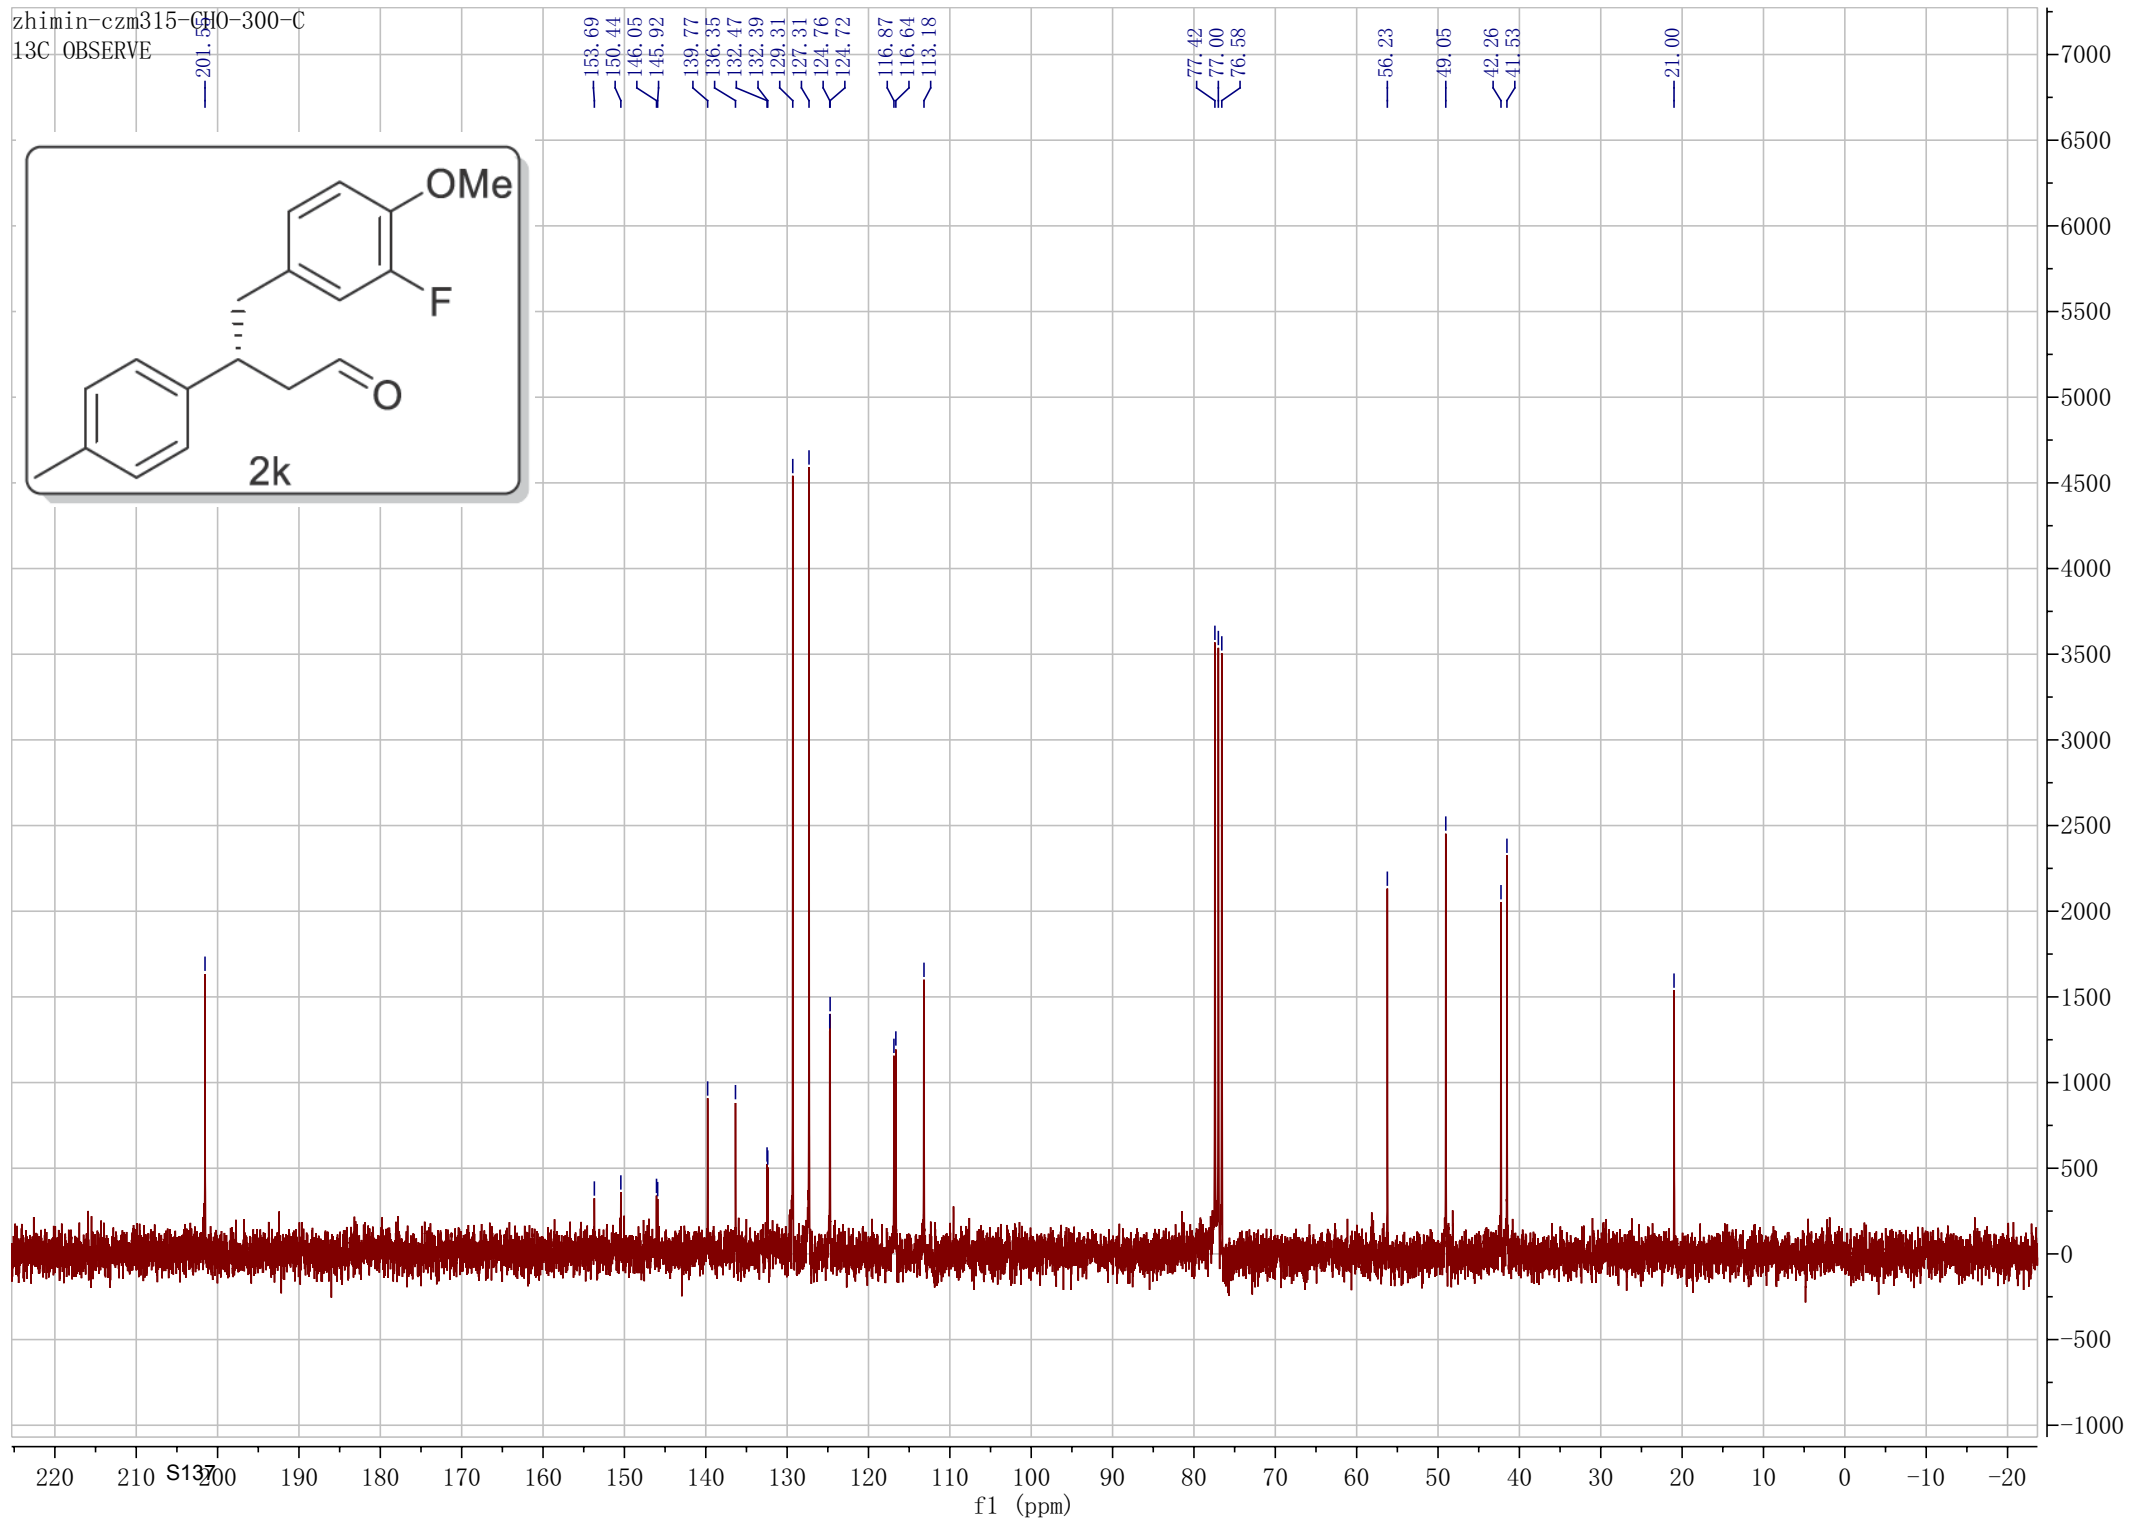

zhimin-czm315-CHO-300-F

19F OBSERVE

STANDARD PARAMETERS

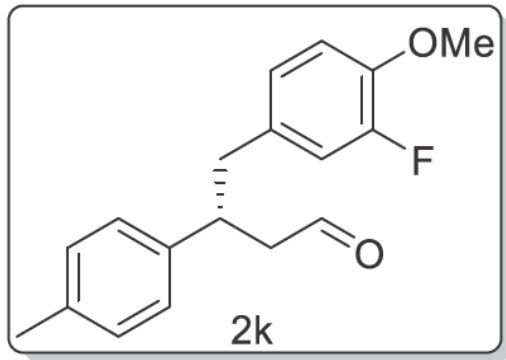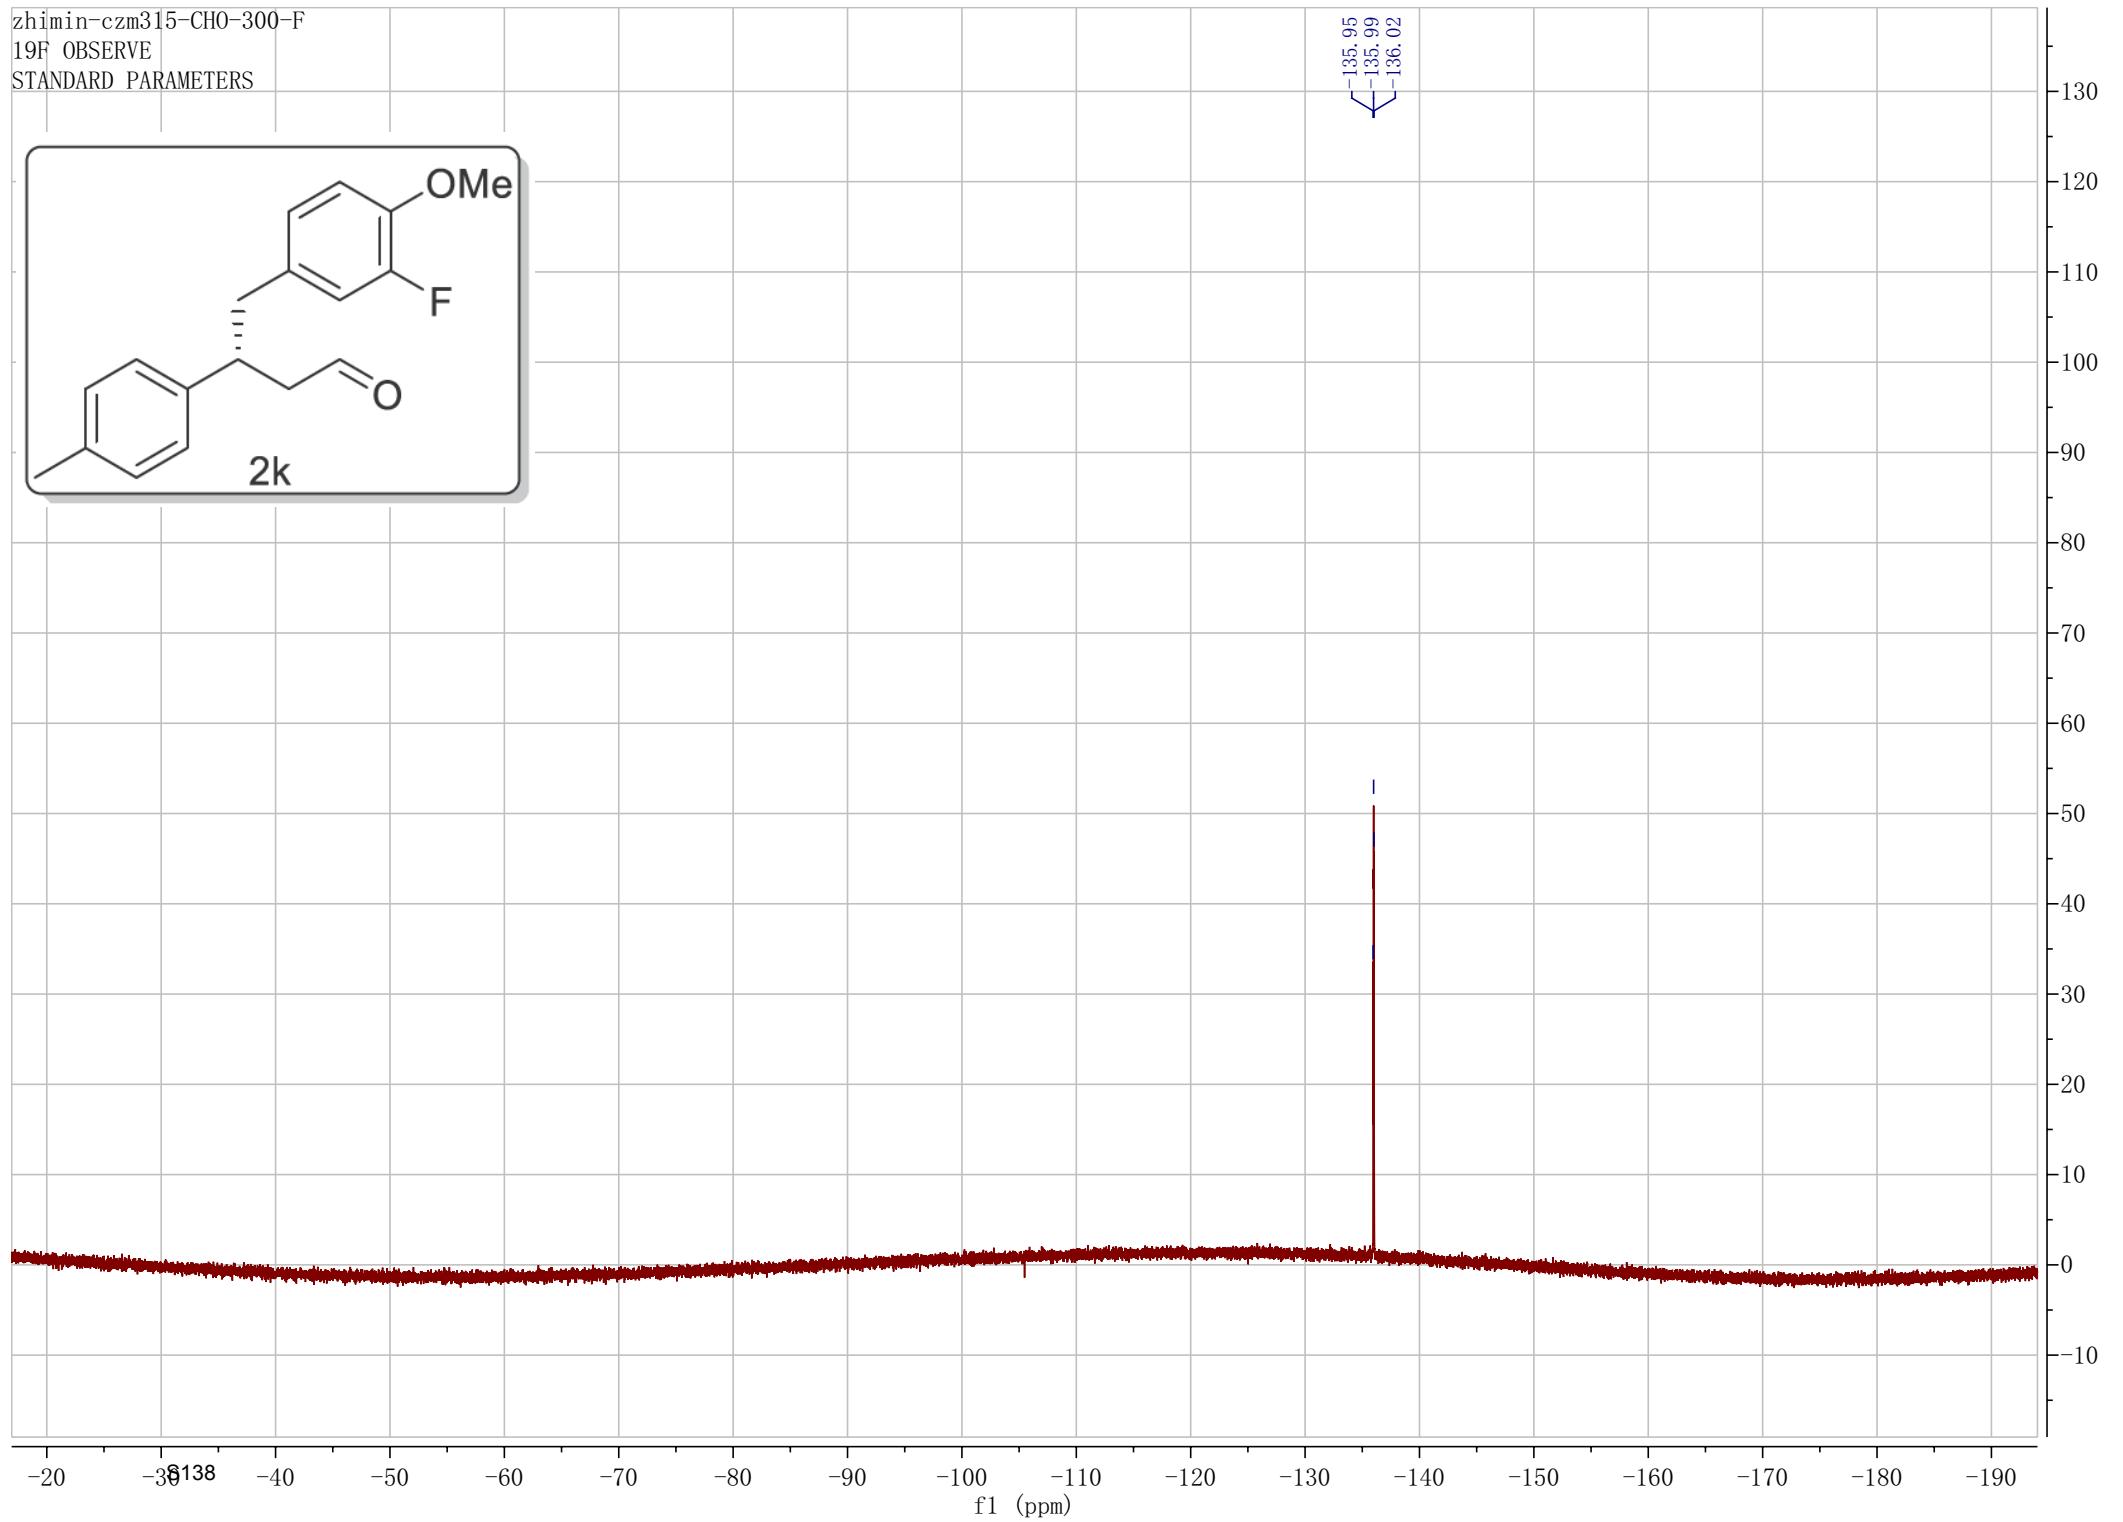



zhimin-cz315-OH-200-H  
UofUtah Unity-300-NMR  
STANDARD 1H OBSERVE

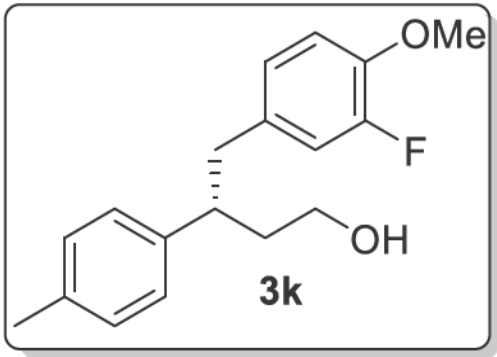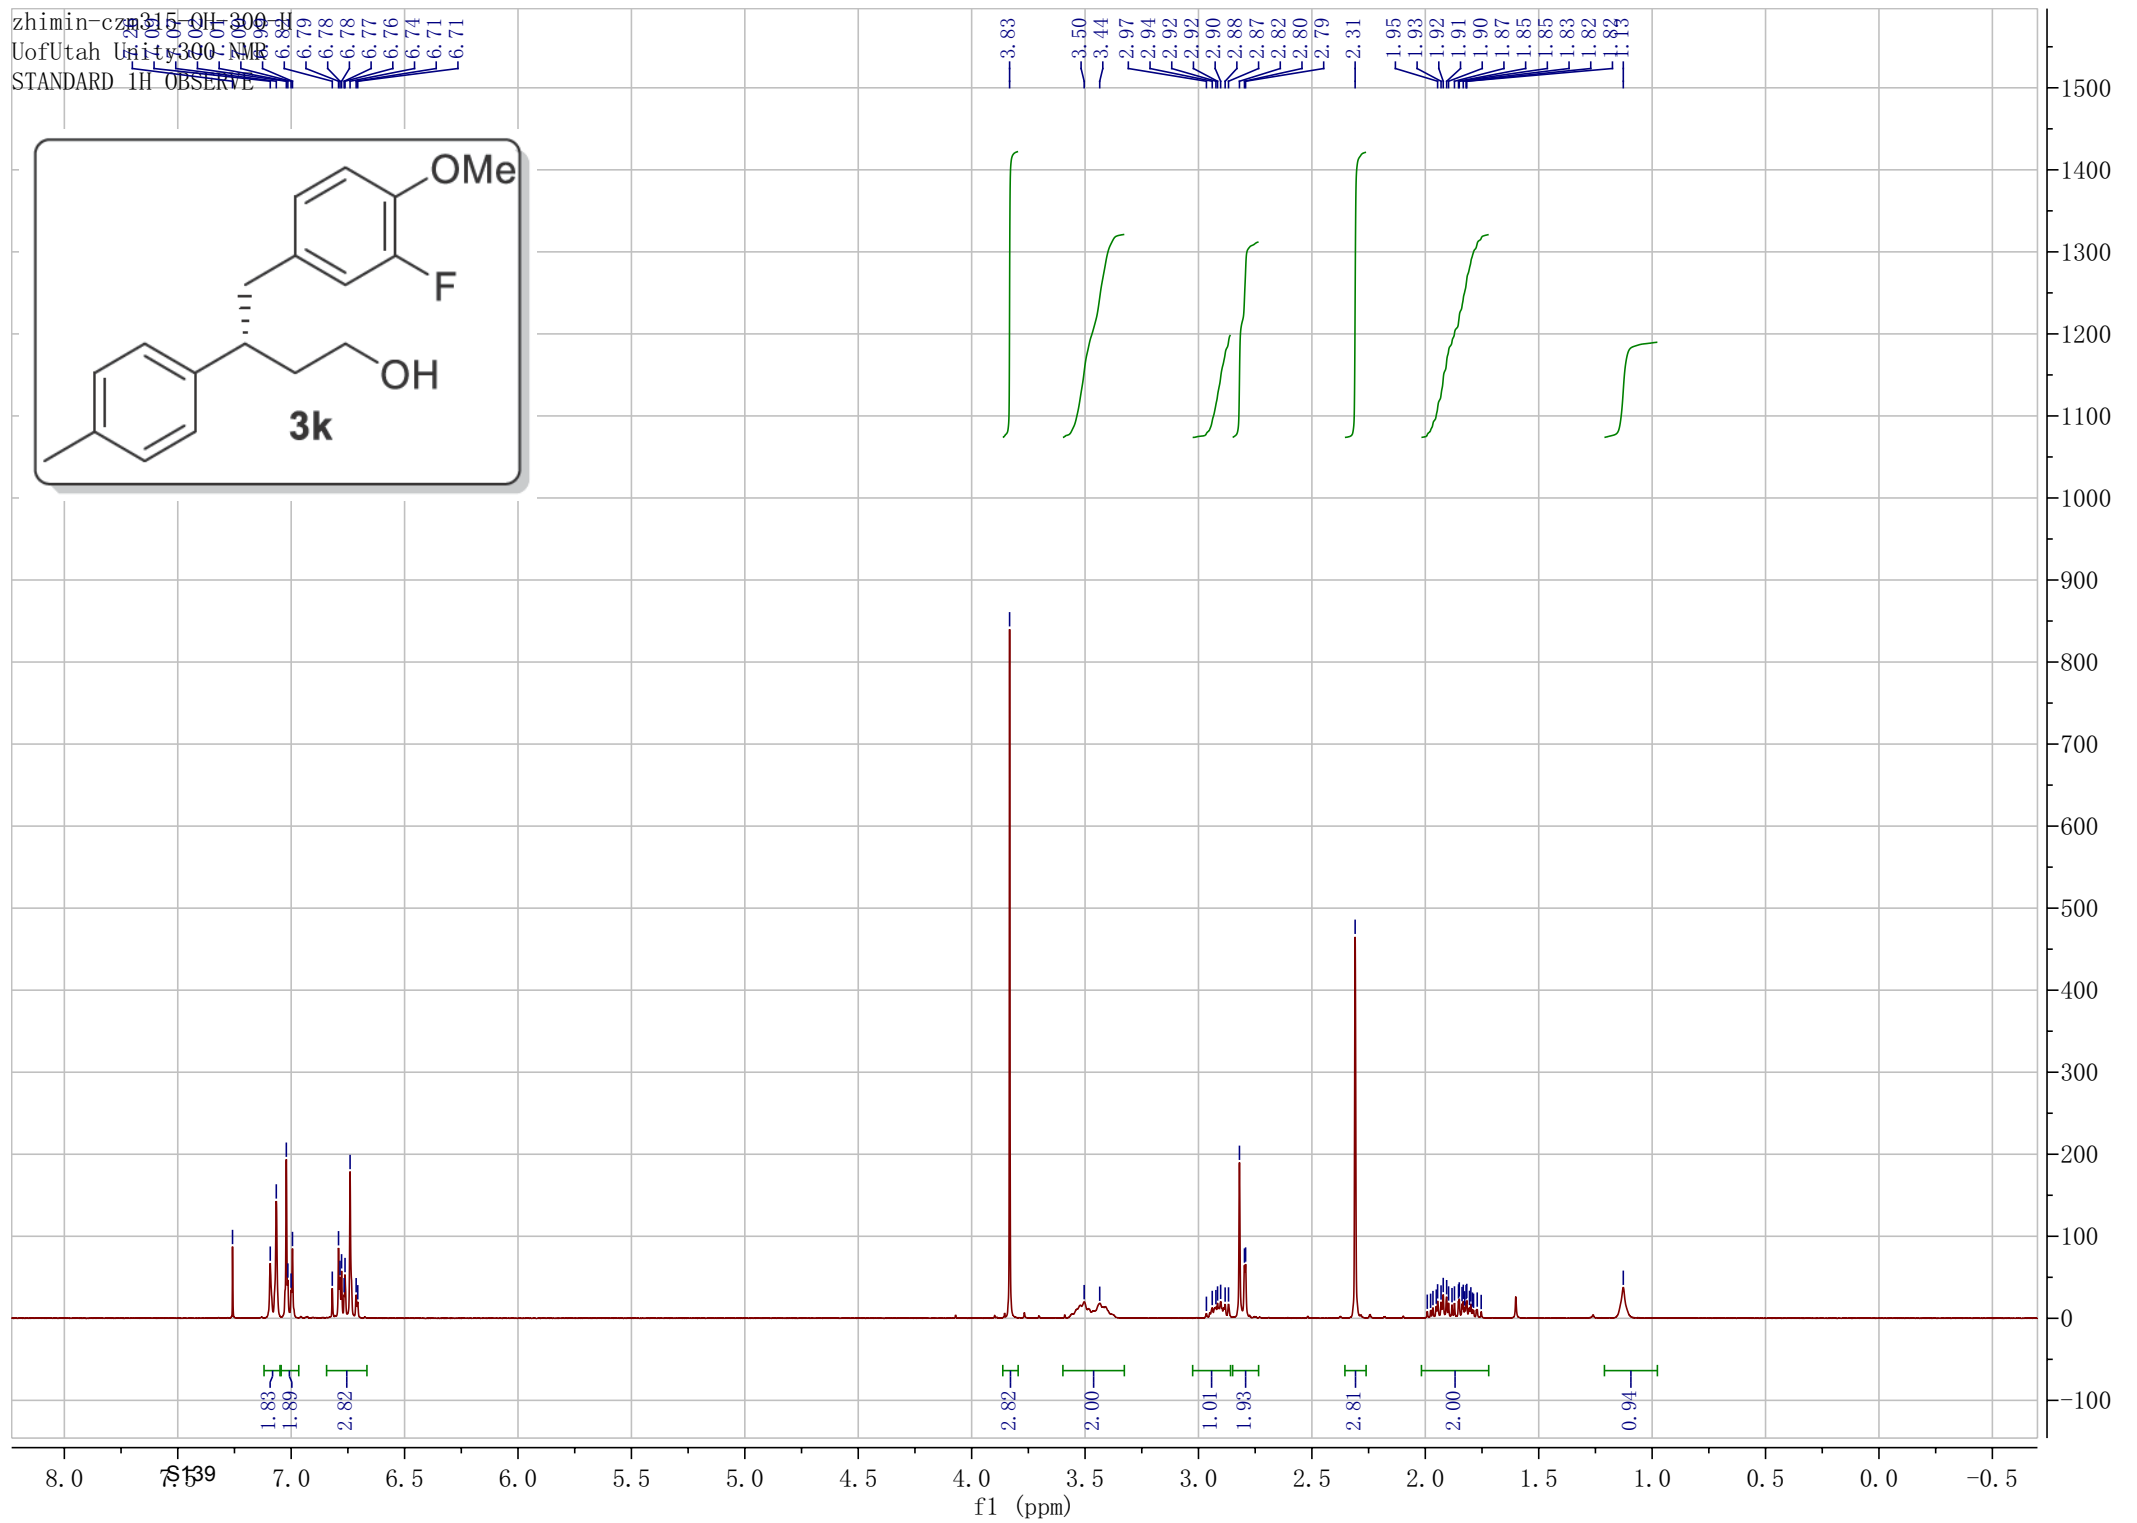

zhimin-czm315-OH-300-C  
13C OBSERVE



153.62  
150.38  
145.70  
145.56  
140.80

135.88  
133.57  
133.49  
129.16  
127.46  
124.62  
124.58

116.80  
116.56  
113.09  
113.06

77.42  
77.00  
76.58

61.05  
56.24

44.00  
42.84

38.21

21.00

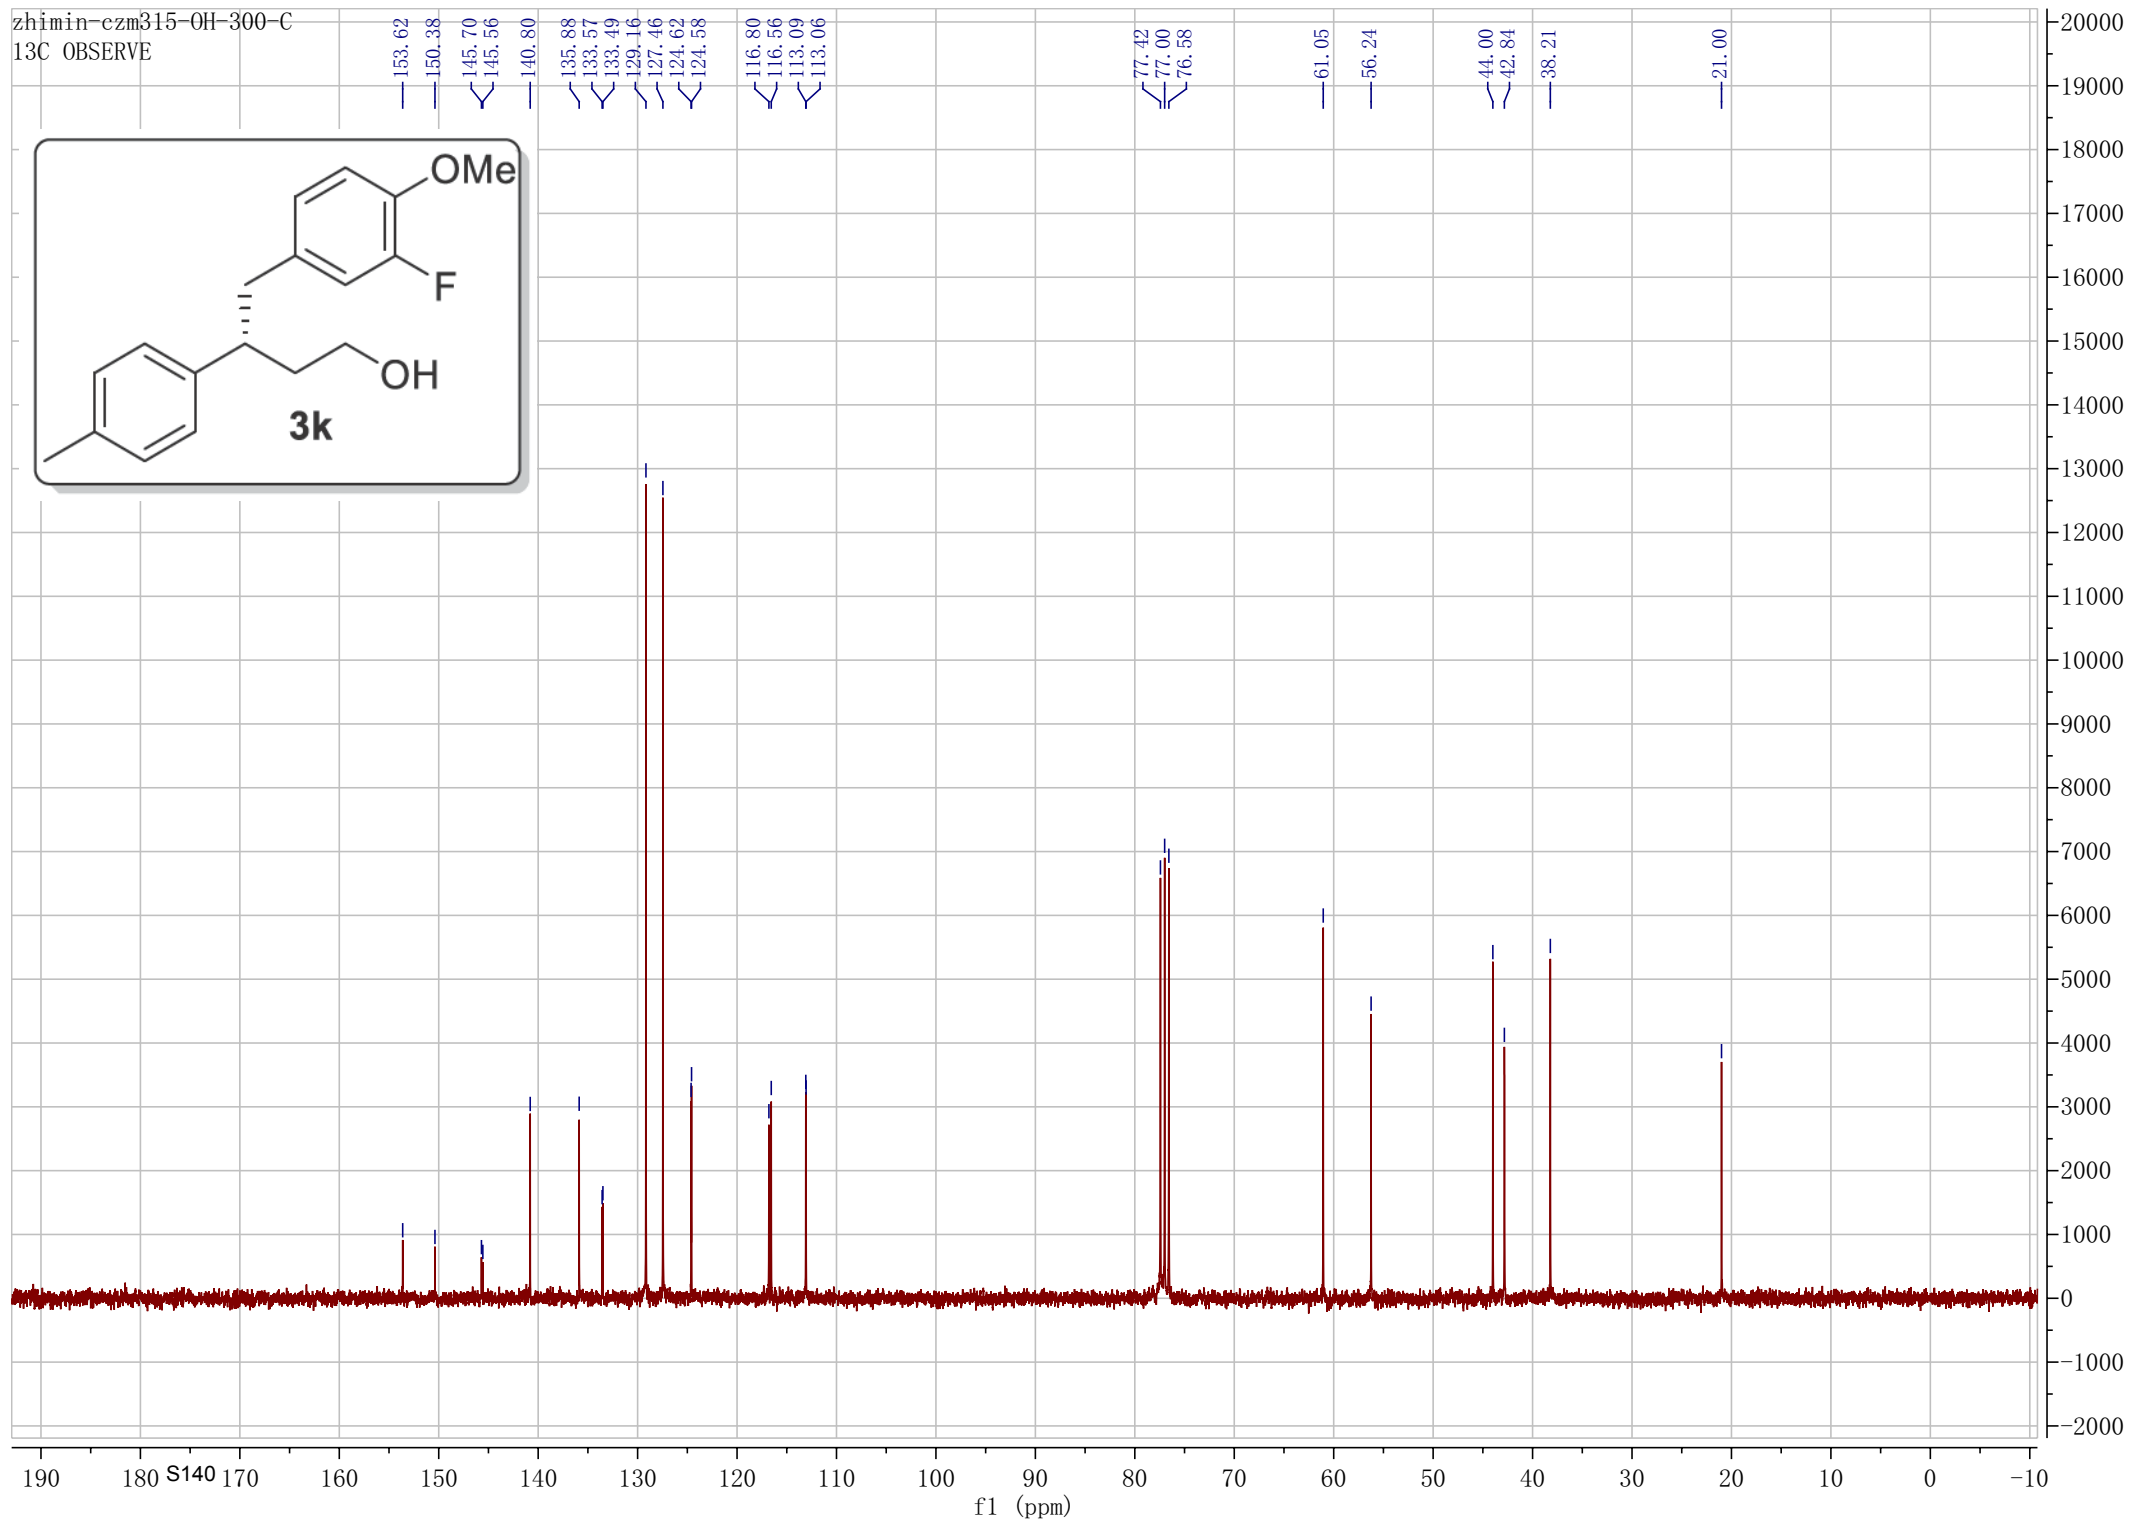

zhimin-czm315-OH-300-F

19F OBSERVE

STANDARD PARAMETERS

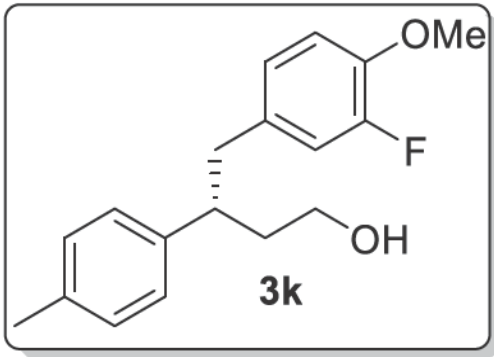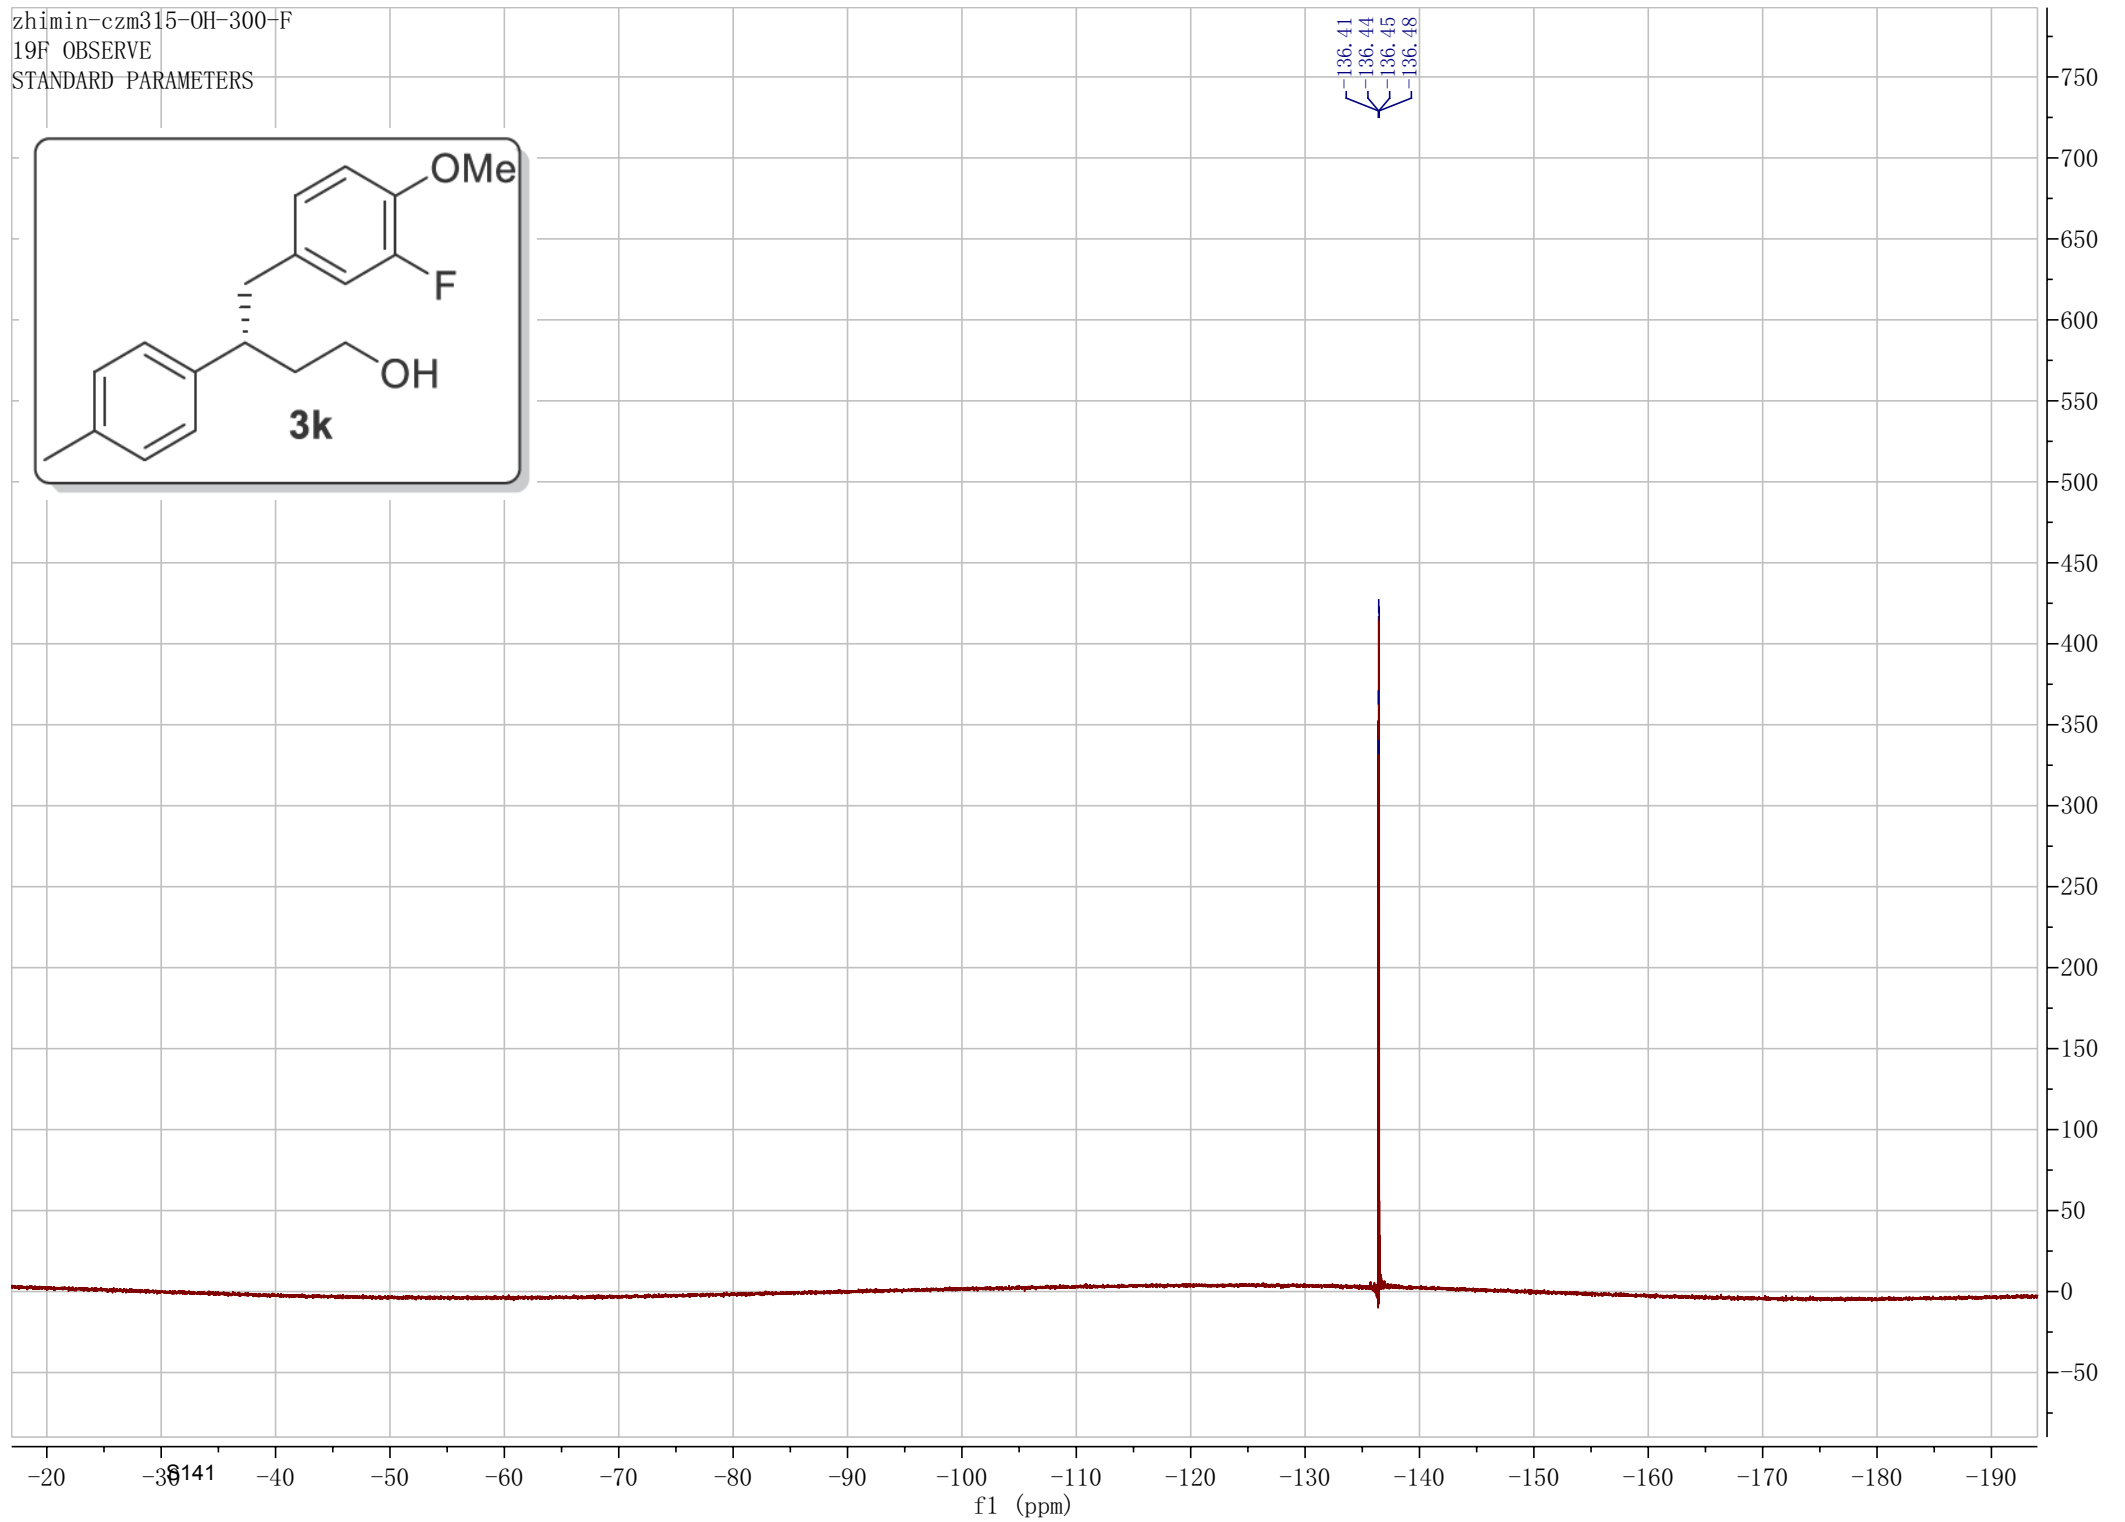

zhimin-czm304-CHO-300-H  
UofUtah Unity300 NMR  
STANDARD 1H OBSERVE

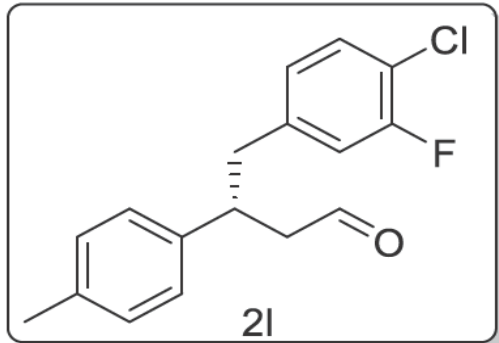

7.26  
7.24  
7.21  
7.19  
7.09  
7.07  
7.00  
6.97  
6.81  
6.77  
6.75  
6.72

3.43  
3.41  
3.39  
3.36

2.87  
2.76  
2.75  
2.74  
2.50

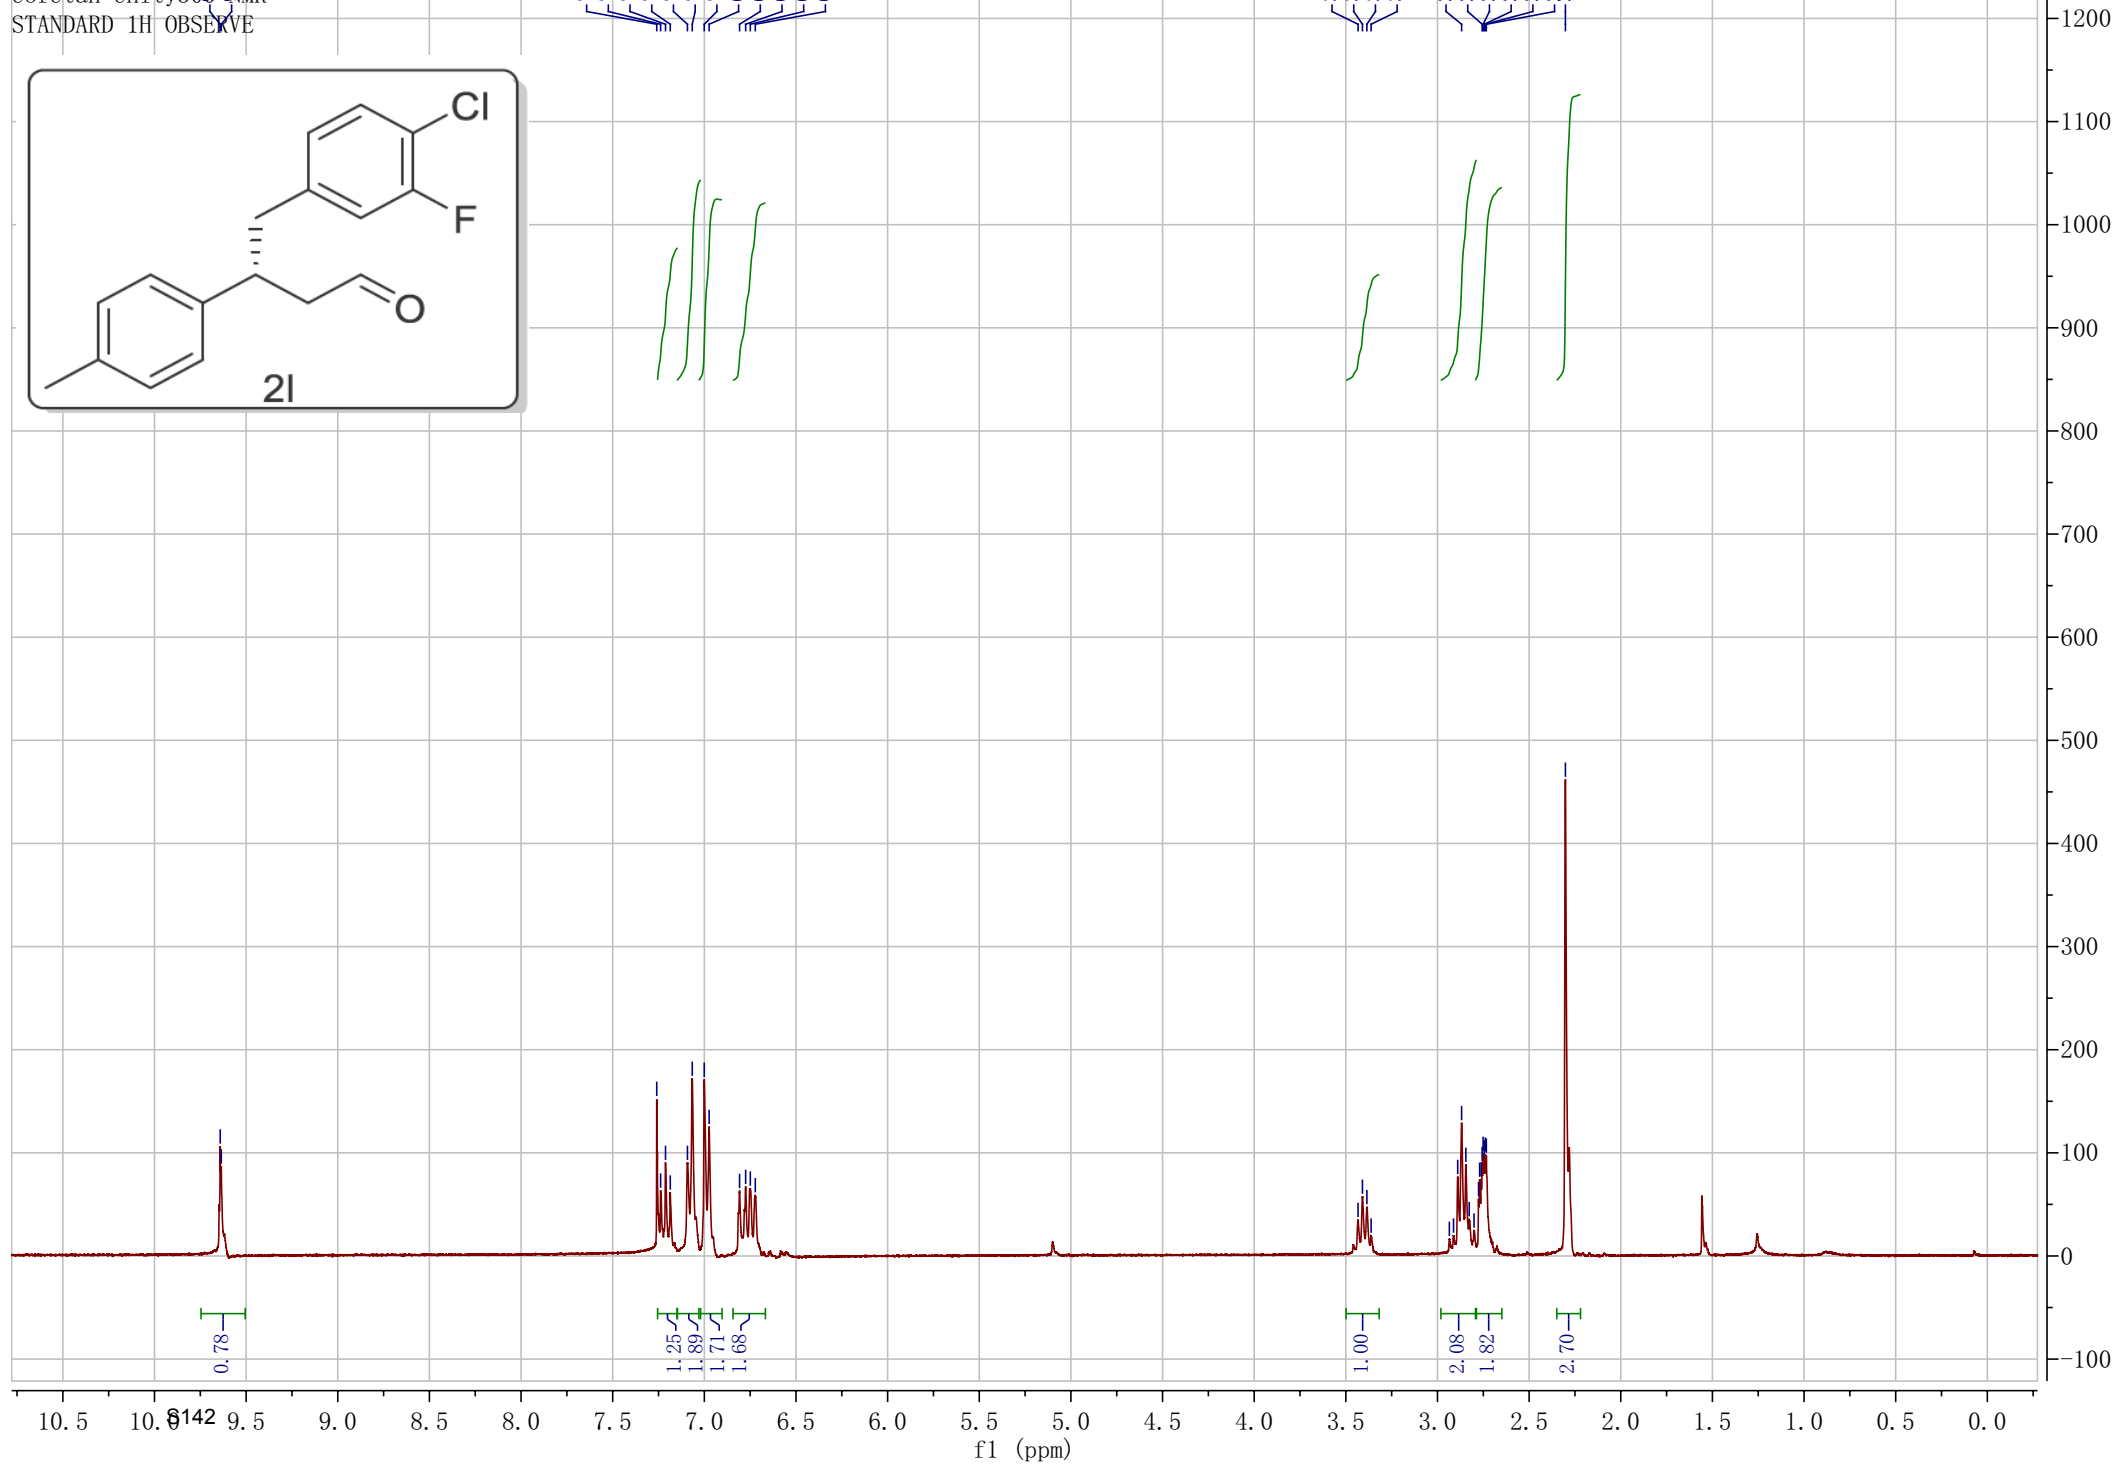

zhimin-czm304-CHO-300-C1

13C OBSERVE

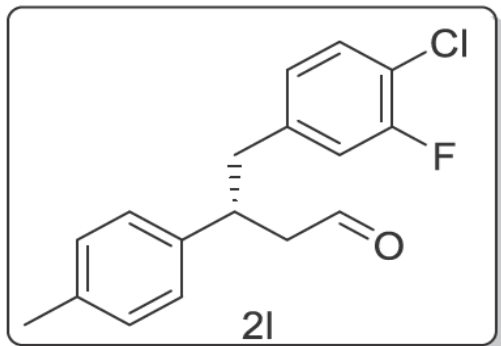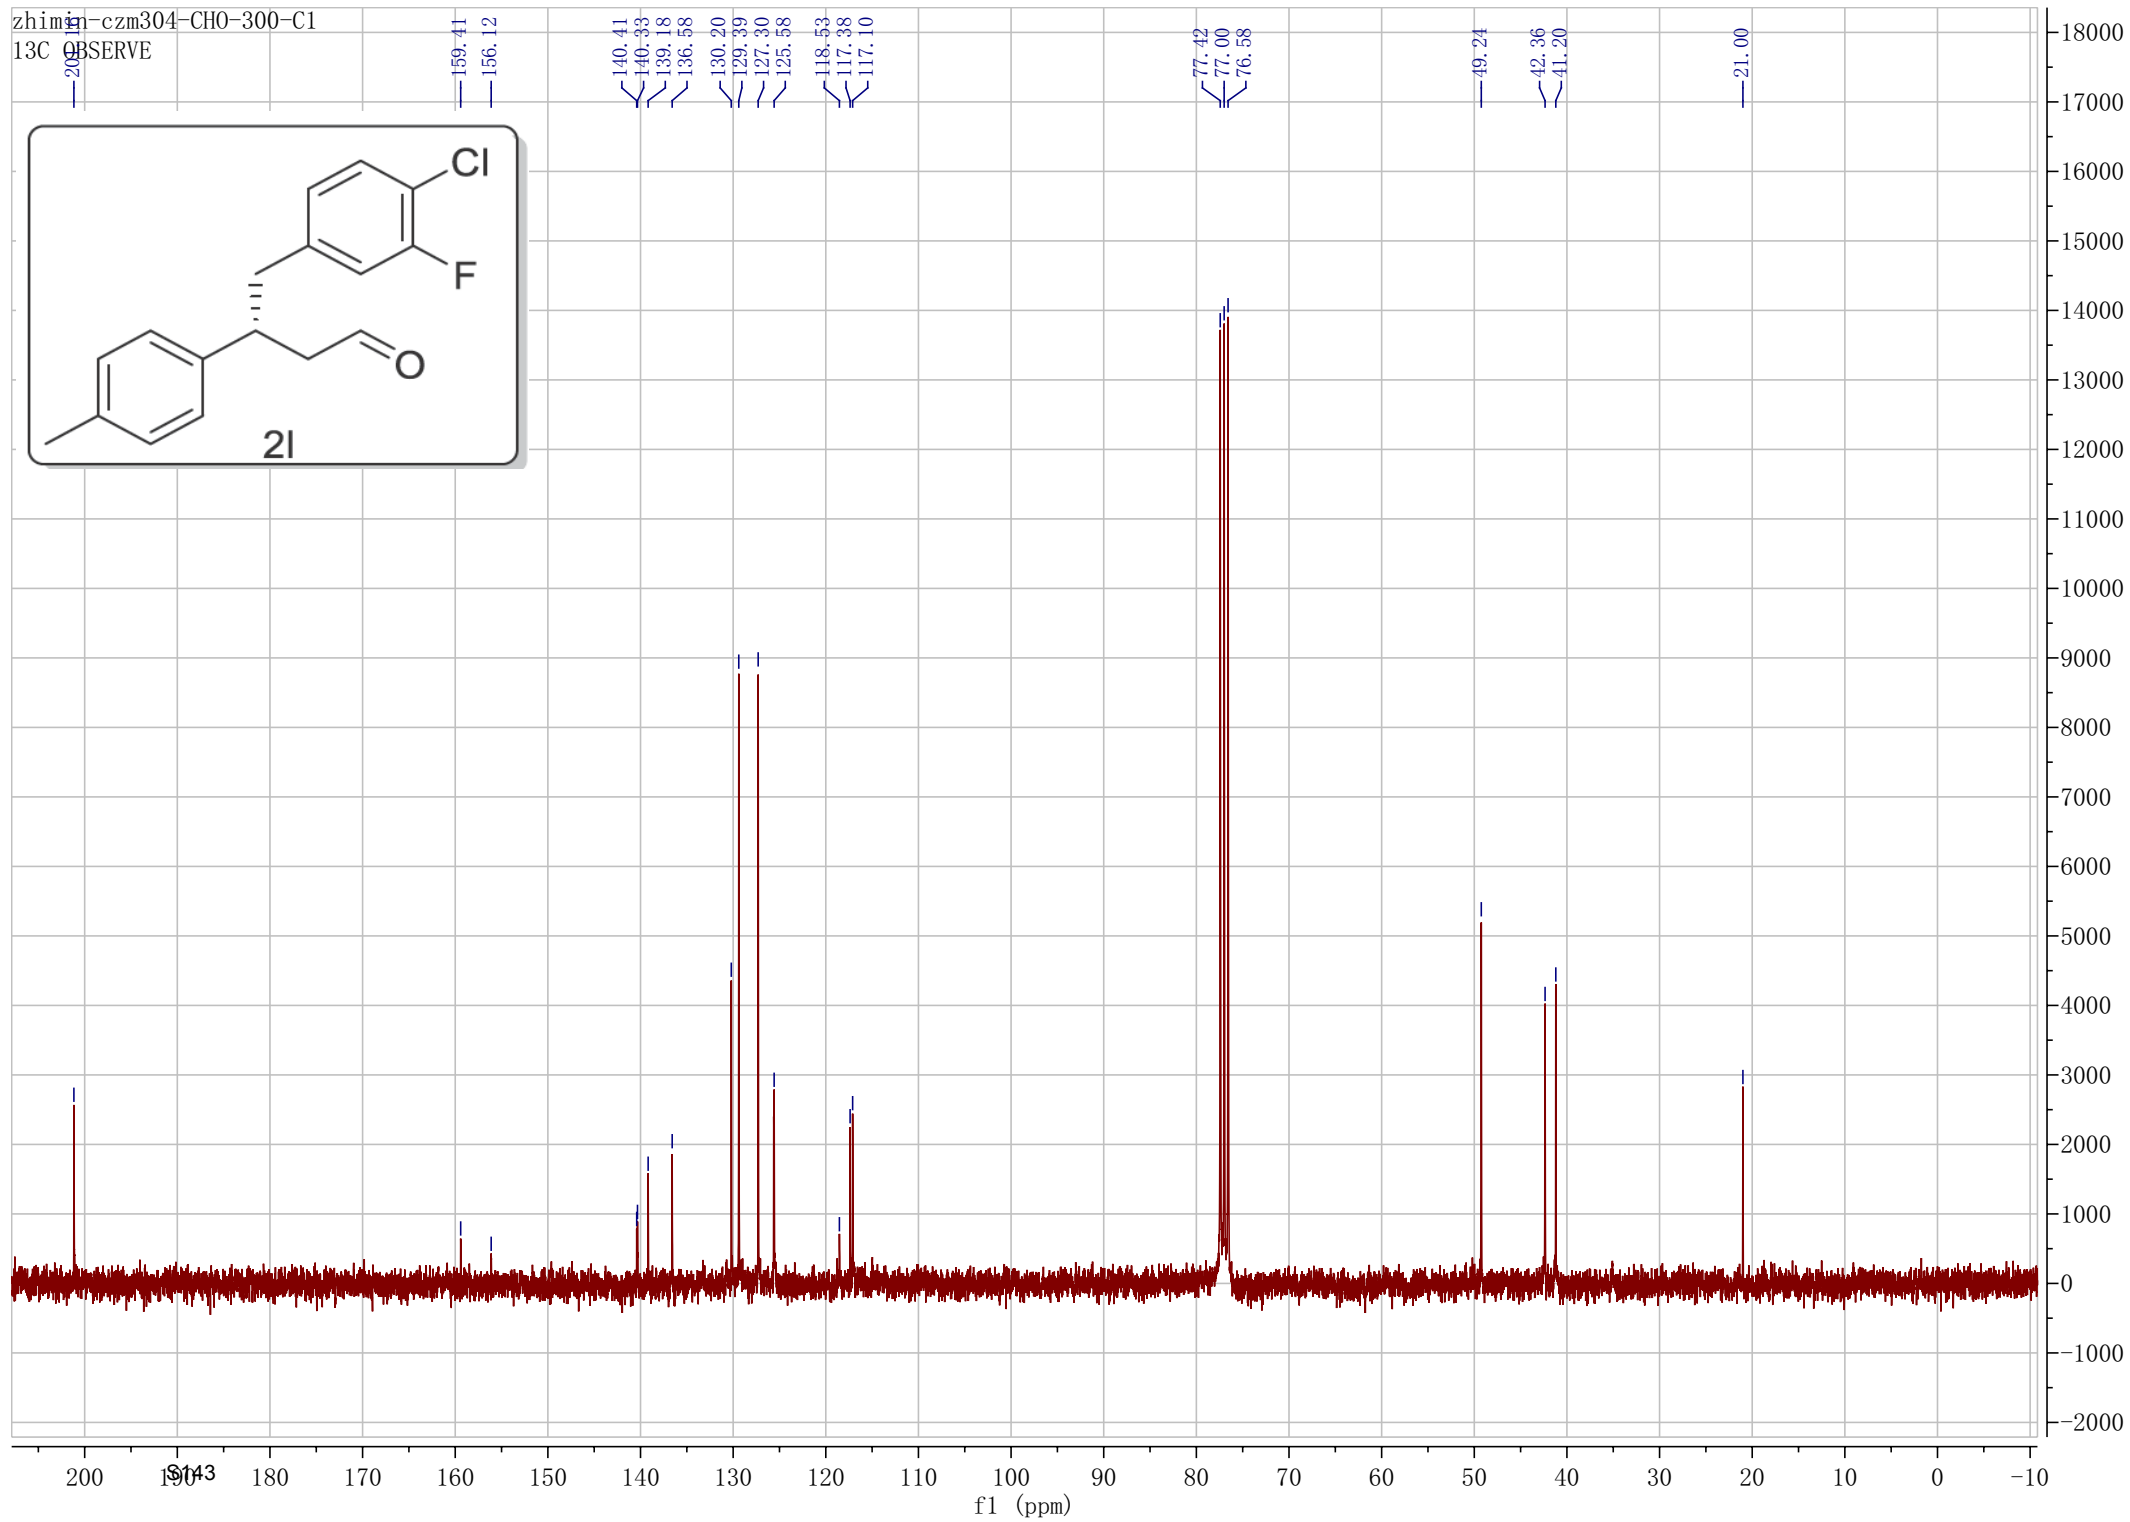

zhimin-czm304-CHO-300-F

19F OBSERVE

STANDARD PARAMETERS

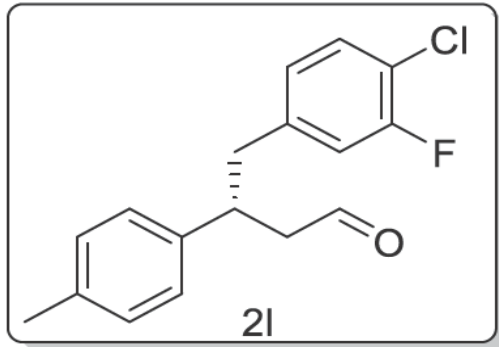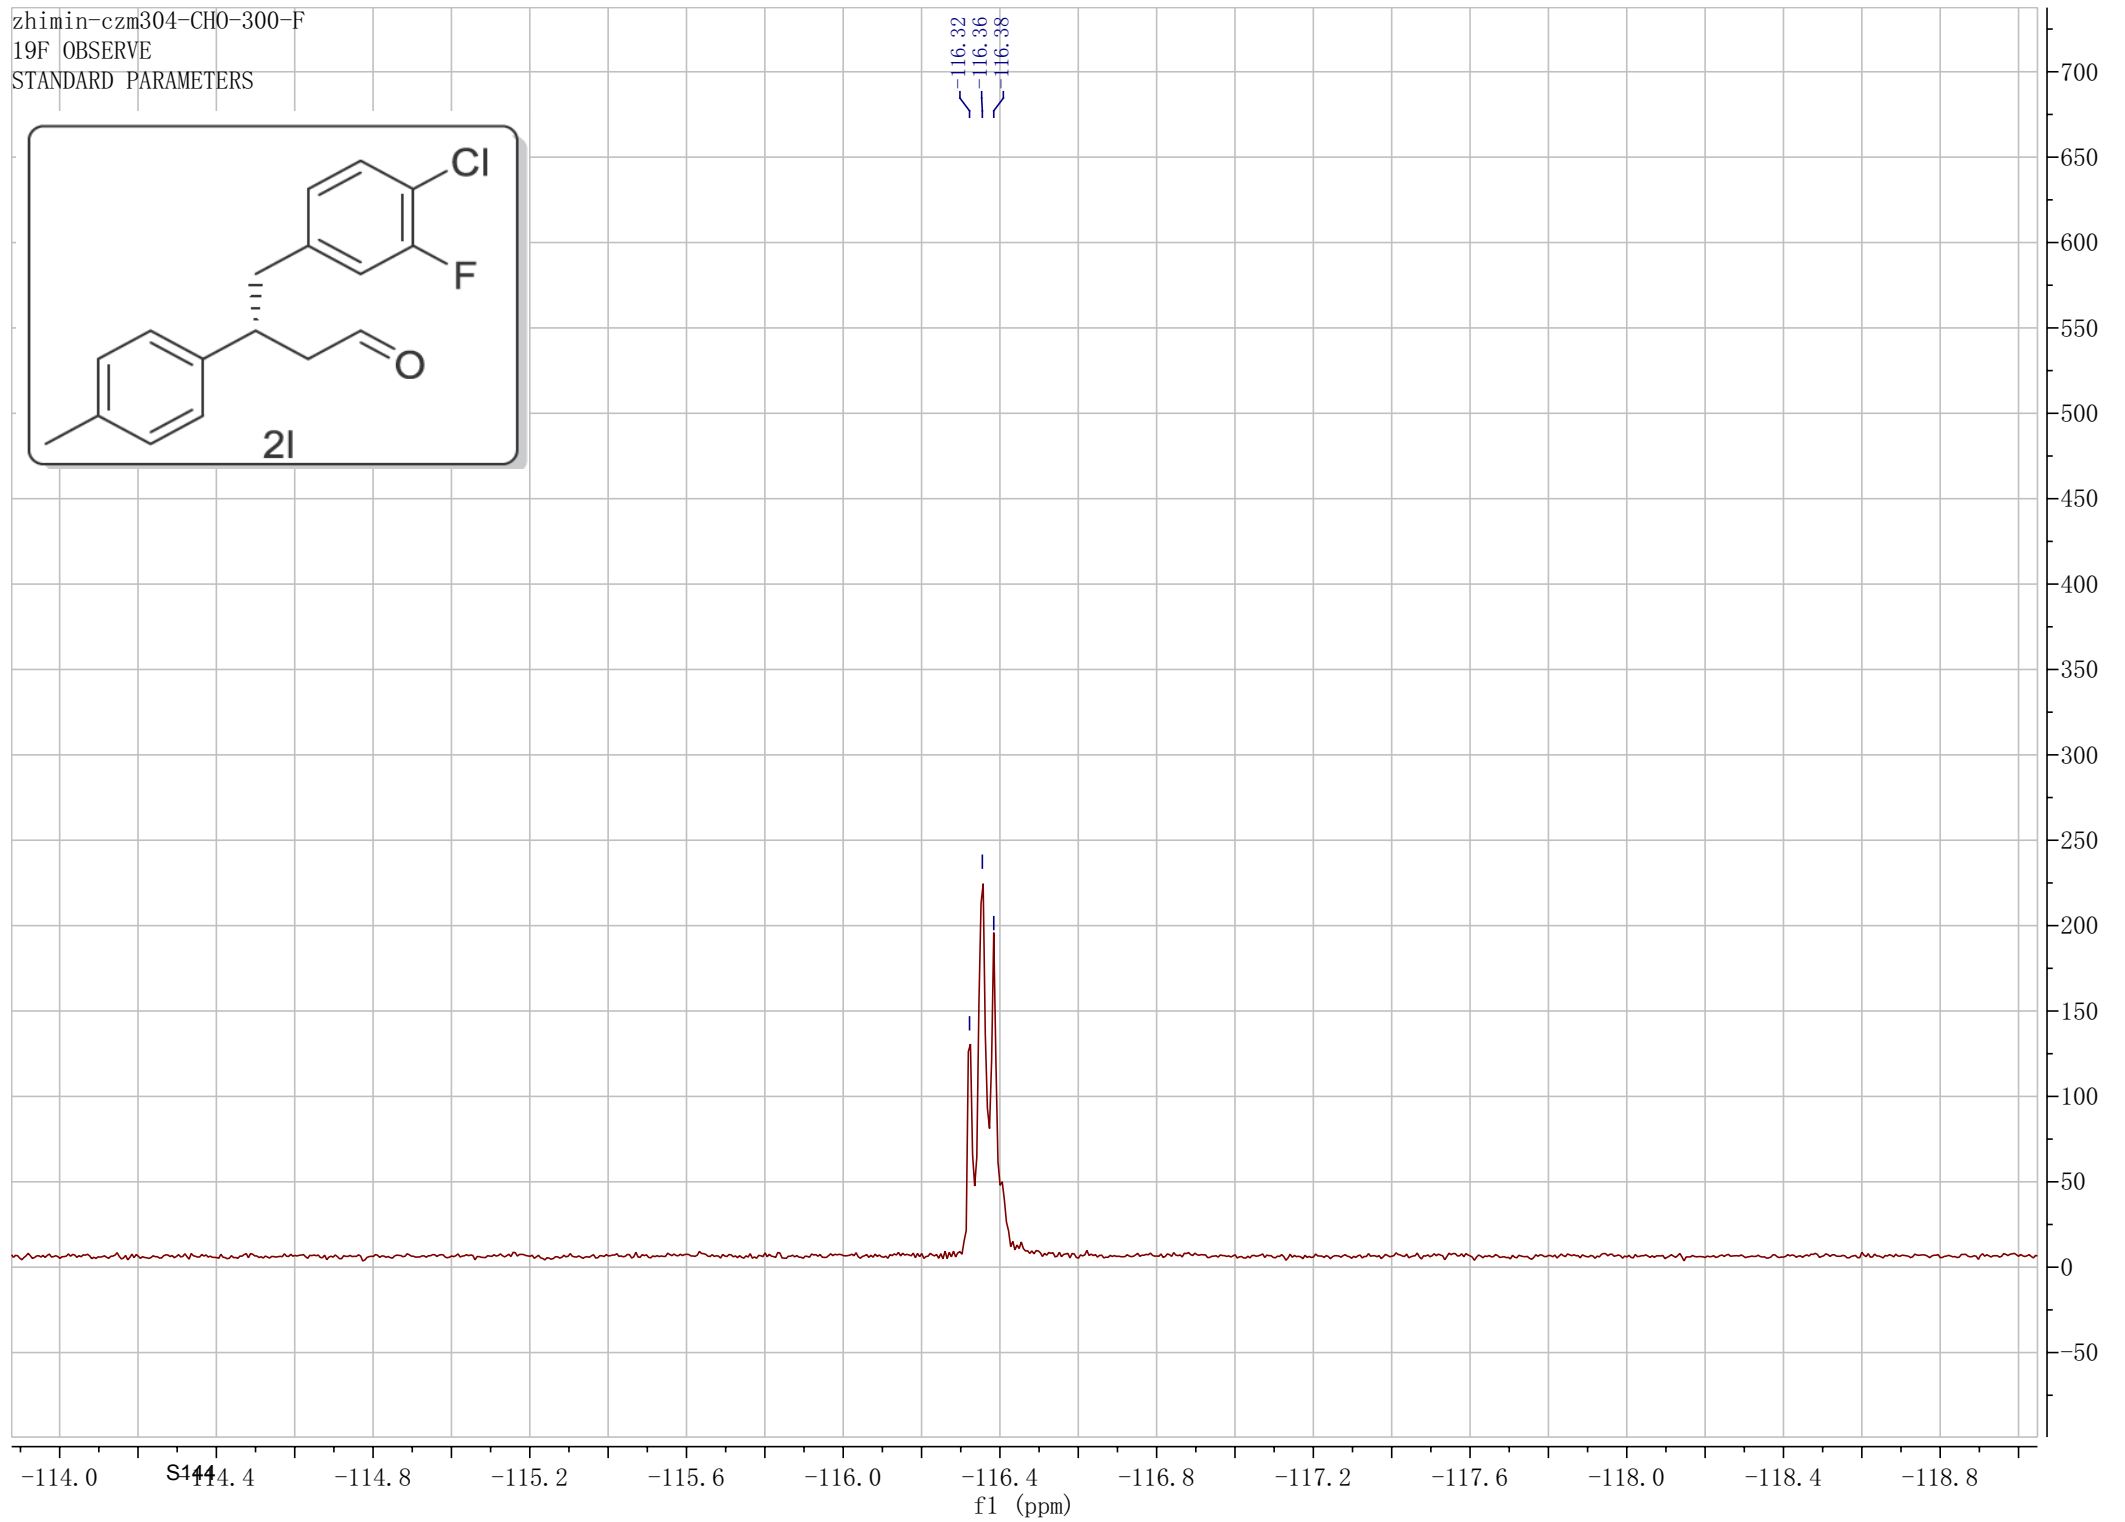

zhimin-czm304-H-300  
UofUtah Unity300 NMR  
STANDARD 1H OBSERVE

7.22  
7.19  
7.16  
7.09  
7.06  
7.00  
6.97  
6.81  
6.78  
6.74  
6.72

3.53  
3.52  
3.44  
2.96  
2.95  
2.93  
2.91  
2.90  
2.86  
2.85  
2.83  
1.95  
1.92  
1.91  
1.90  
1.89  
1.87  
1.85  
1.84  
1.82

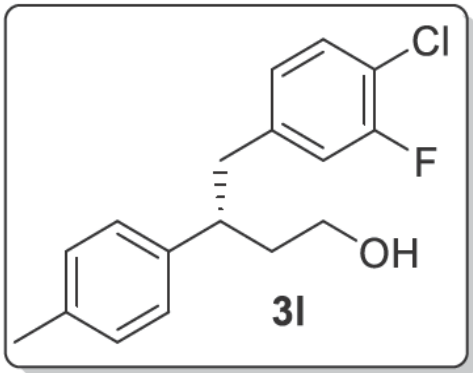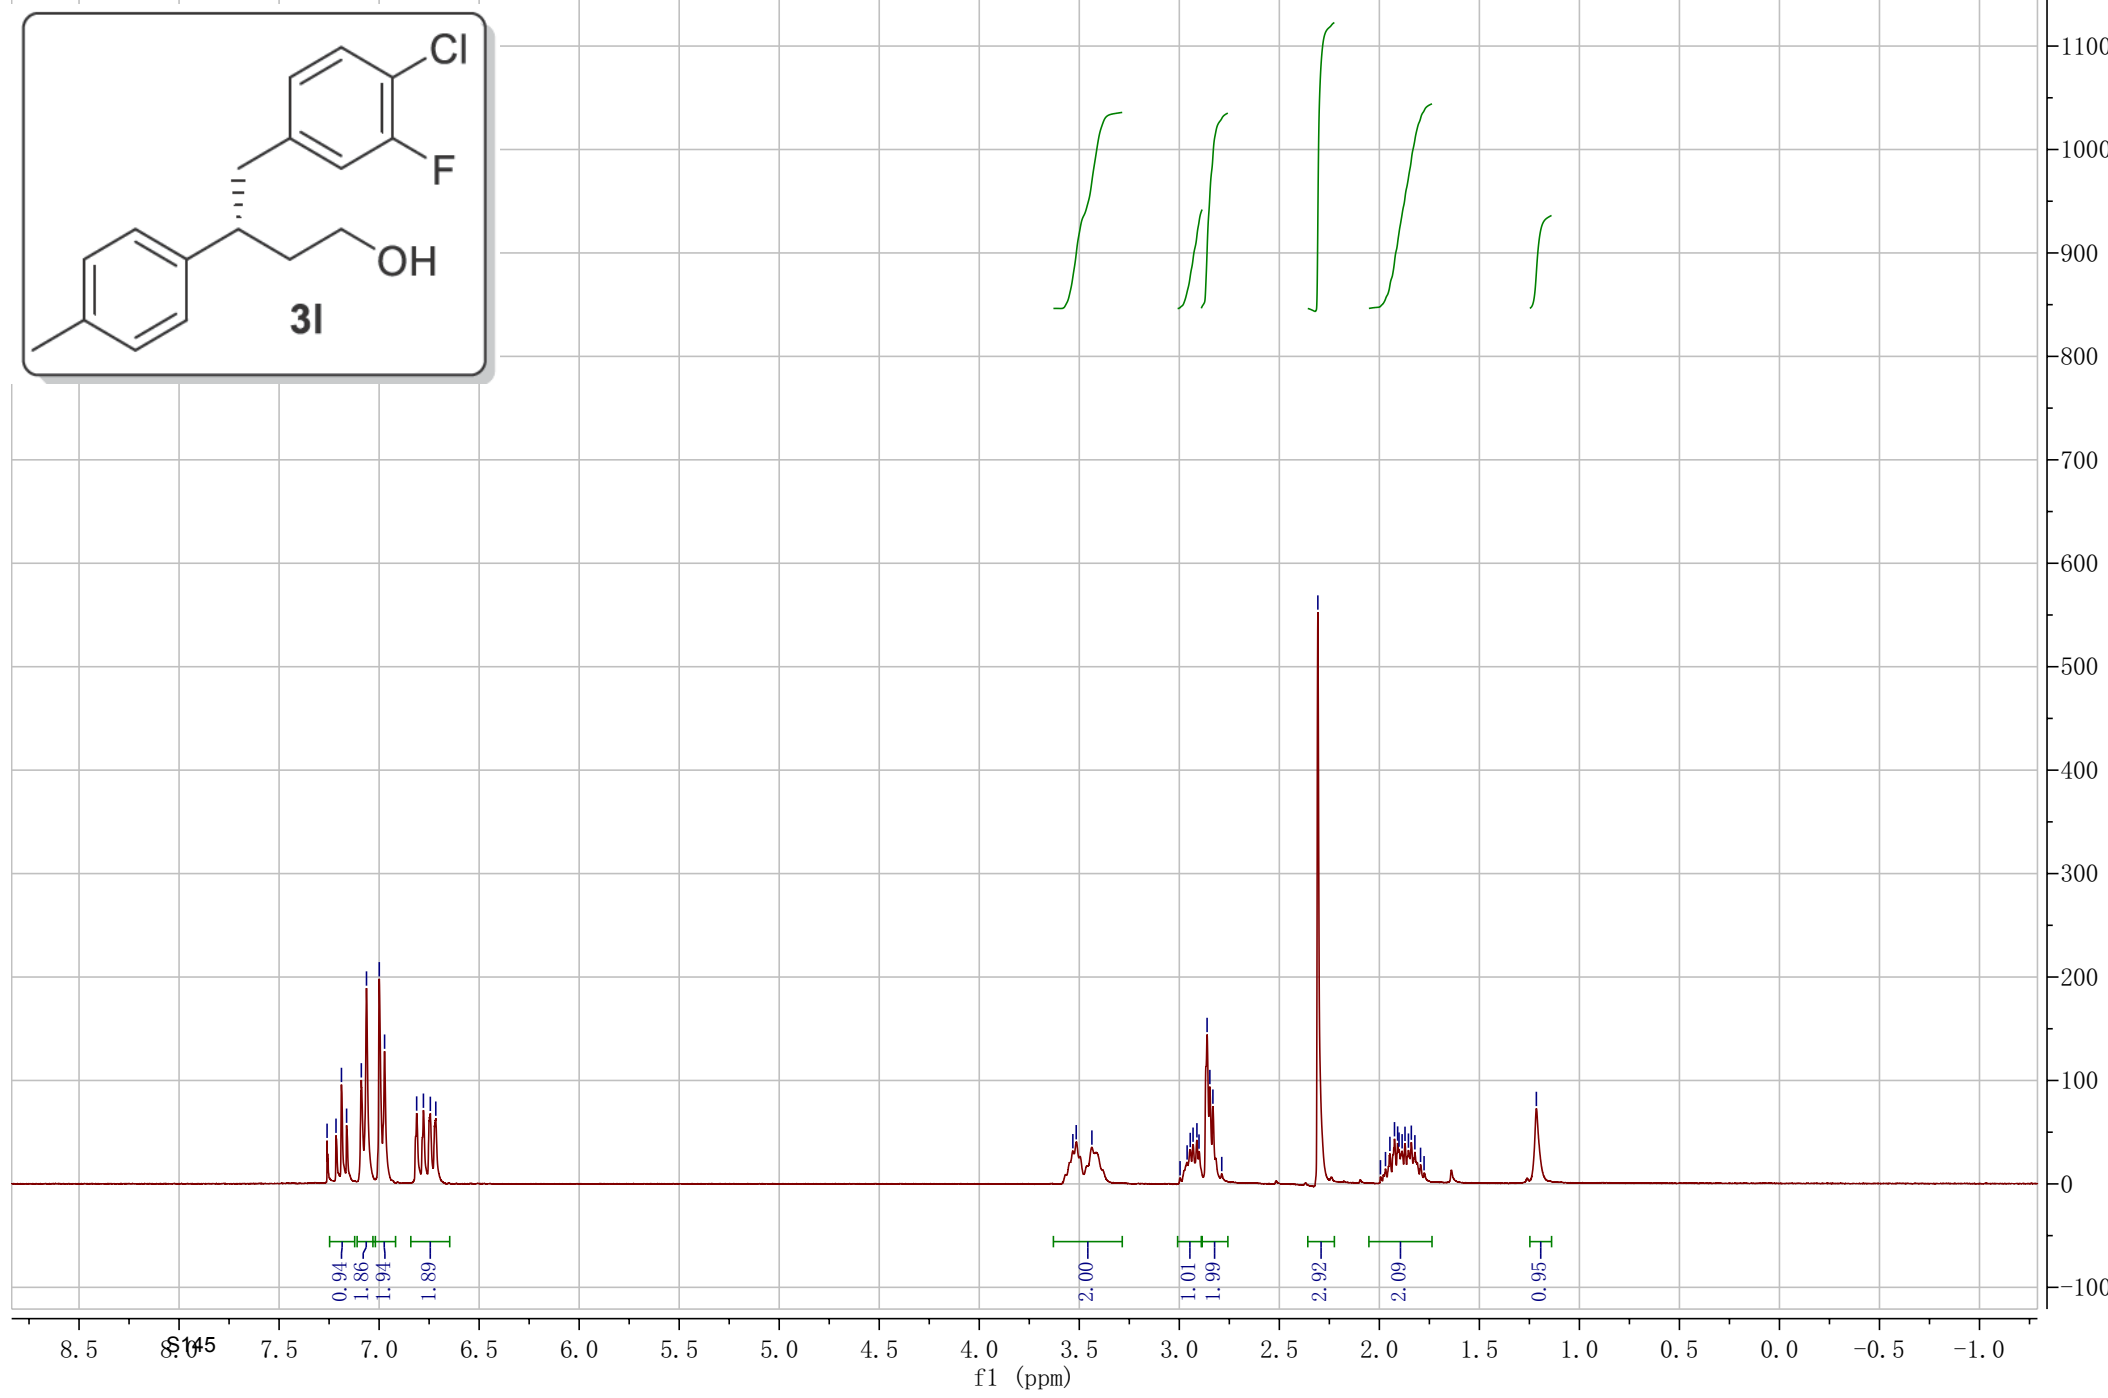

zhimin-czm304-OH-300-C  
13C\_OBSERVE

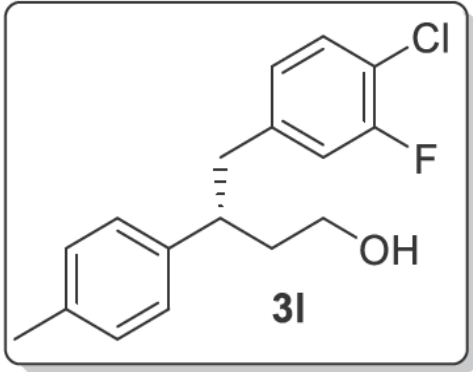

159.30  
156.01  
141.42  
141.33  
140.14  
136.08  
129.96  
129.23  
127.43  
125.56  
125.52  
118.23  
118.00  
117.27  
117.00

77.42  
77.00  
76.58

60.82

43.74  
43.03

38.32

21.00

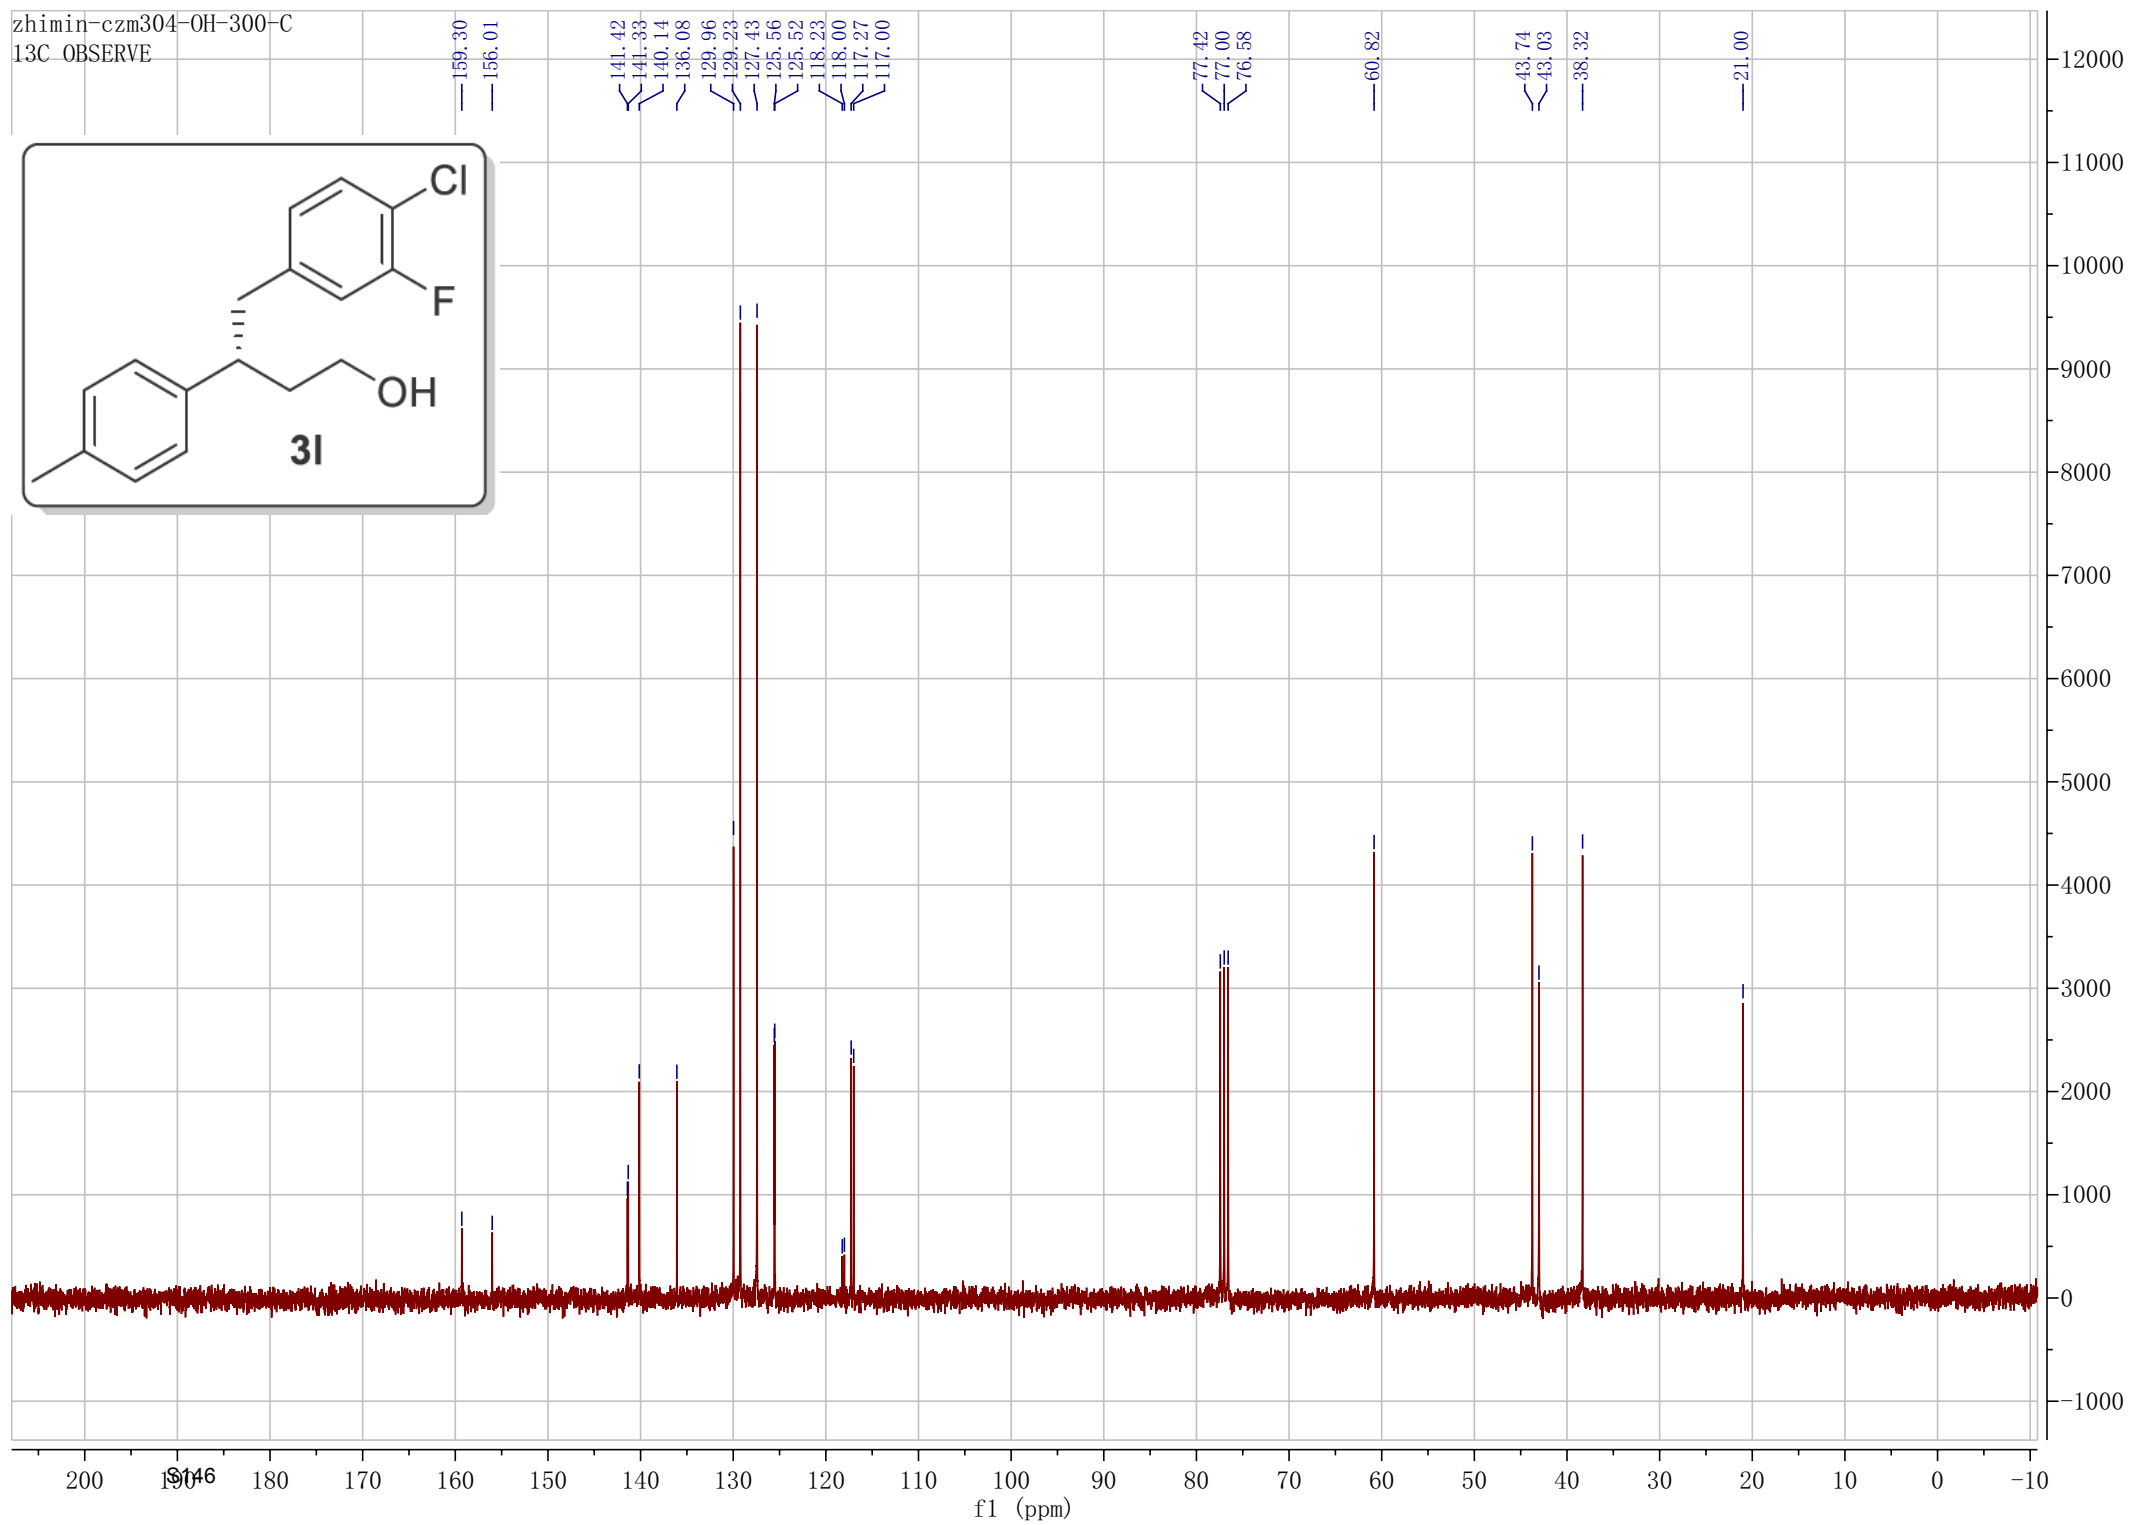



zhimin-czm304-OH-300-F

19F OBSERVE

STANDARD PARAMETERS

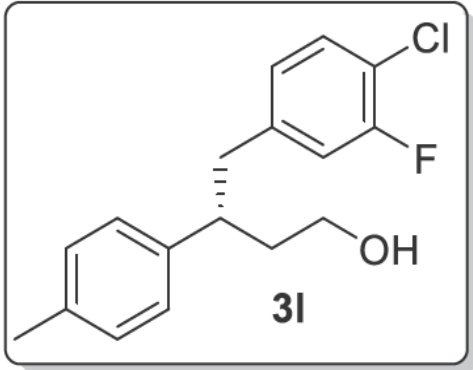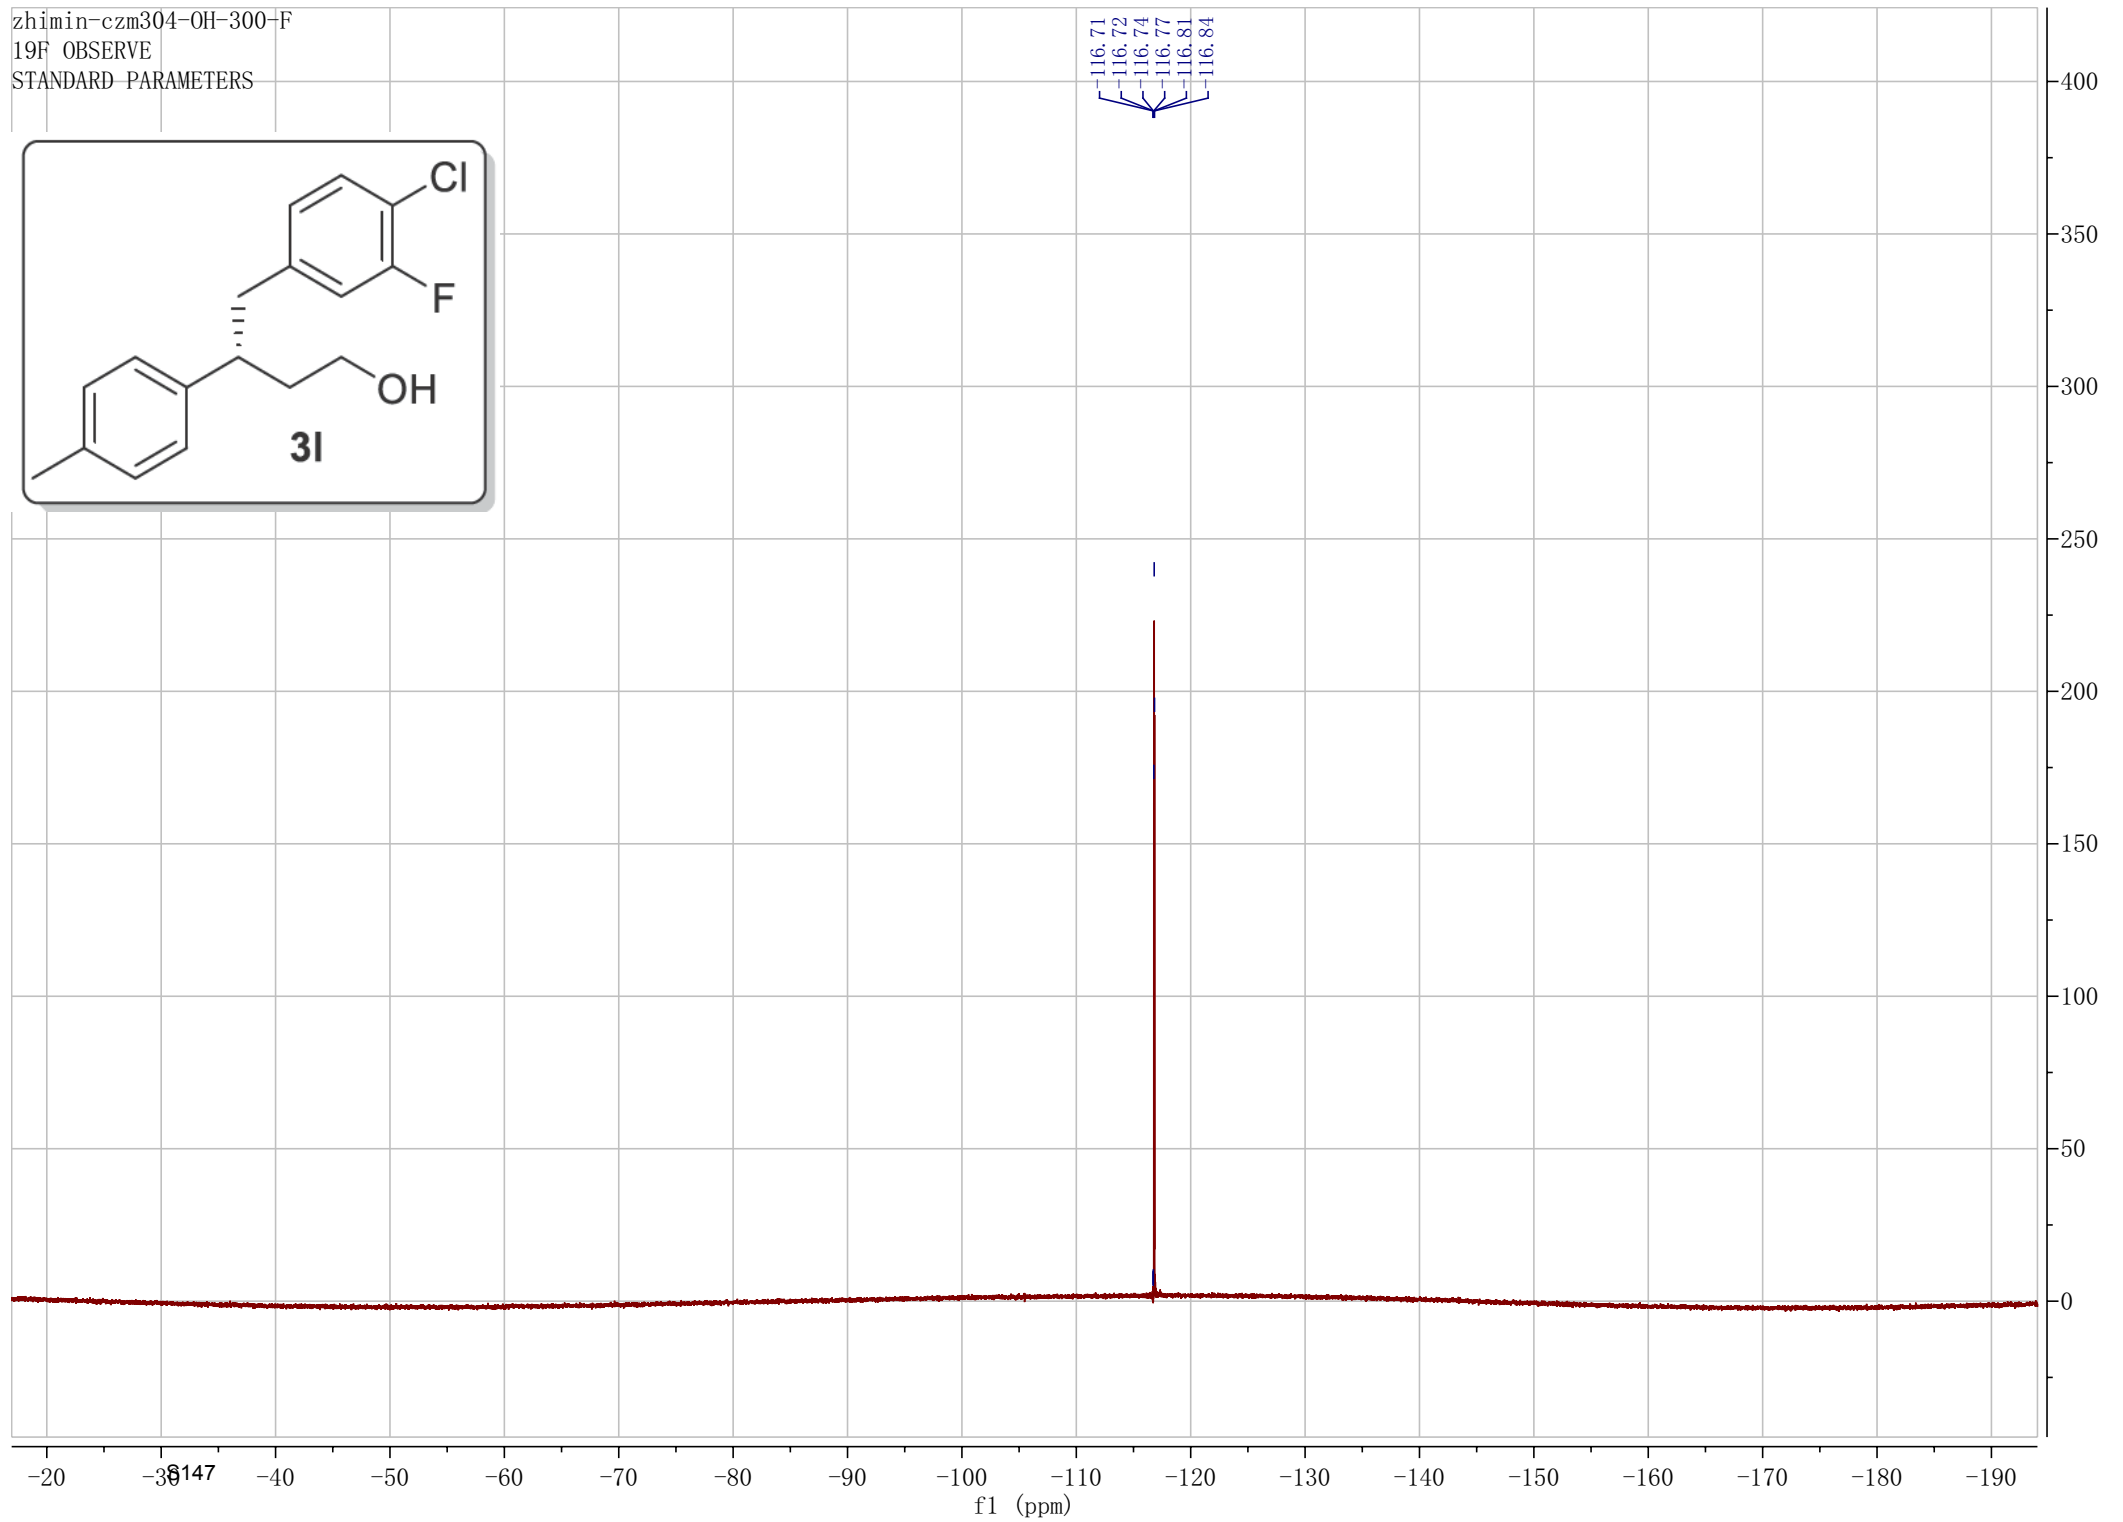

zhimin-czm35dicl-CHO-500-H  
STANDARD PROTON PARAMETERS

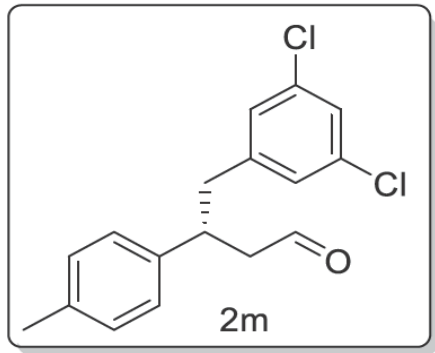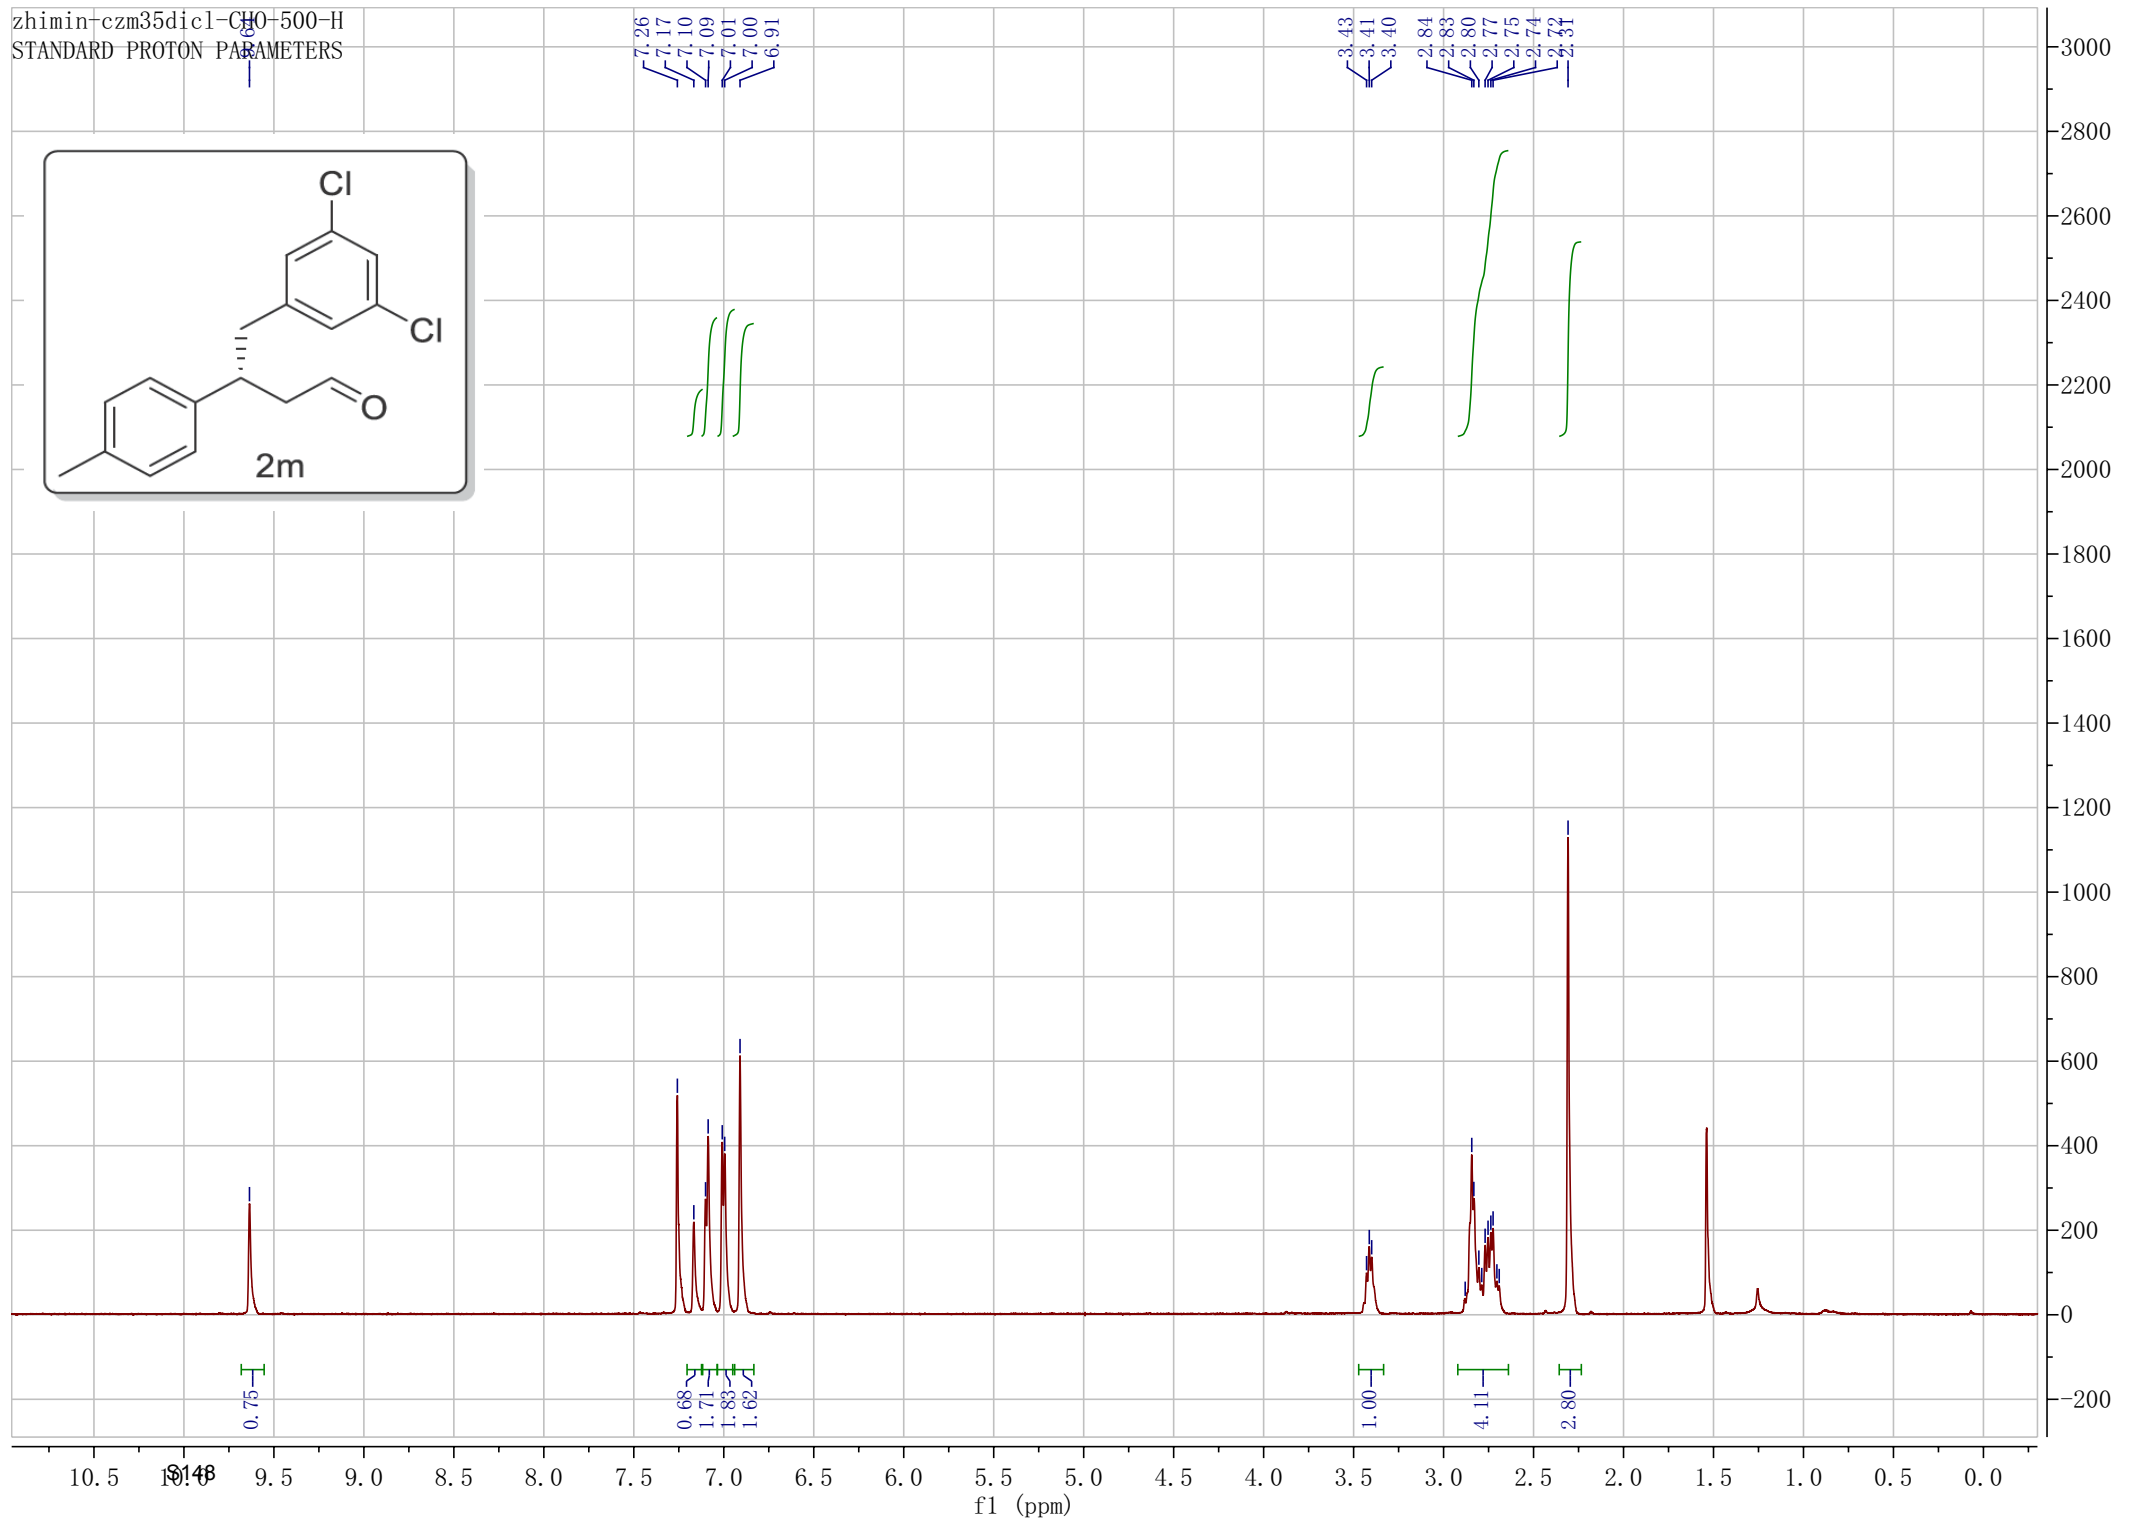

zhimin-czm35di-300-CHO-C  
13C OBSERVE

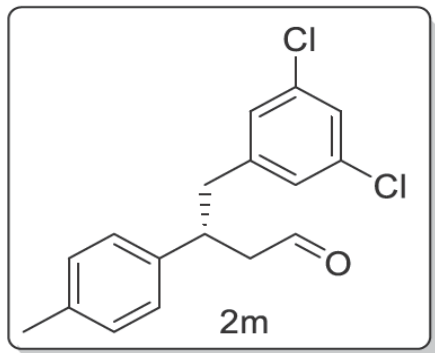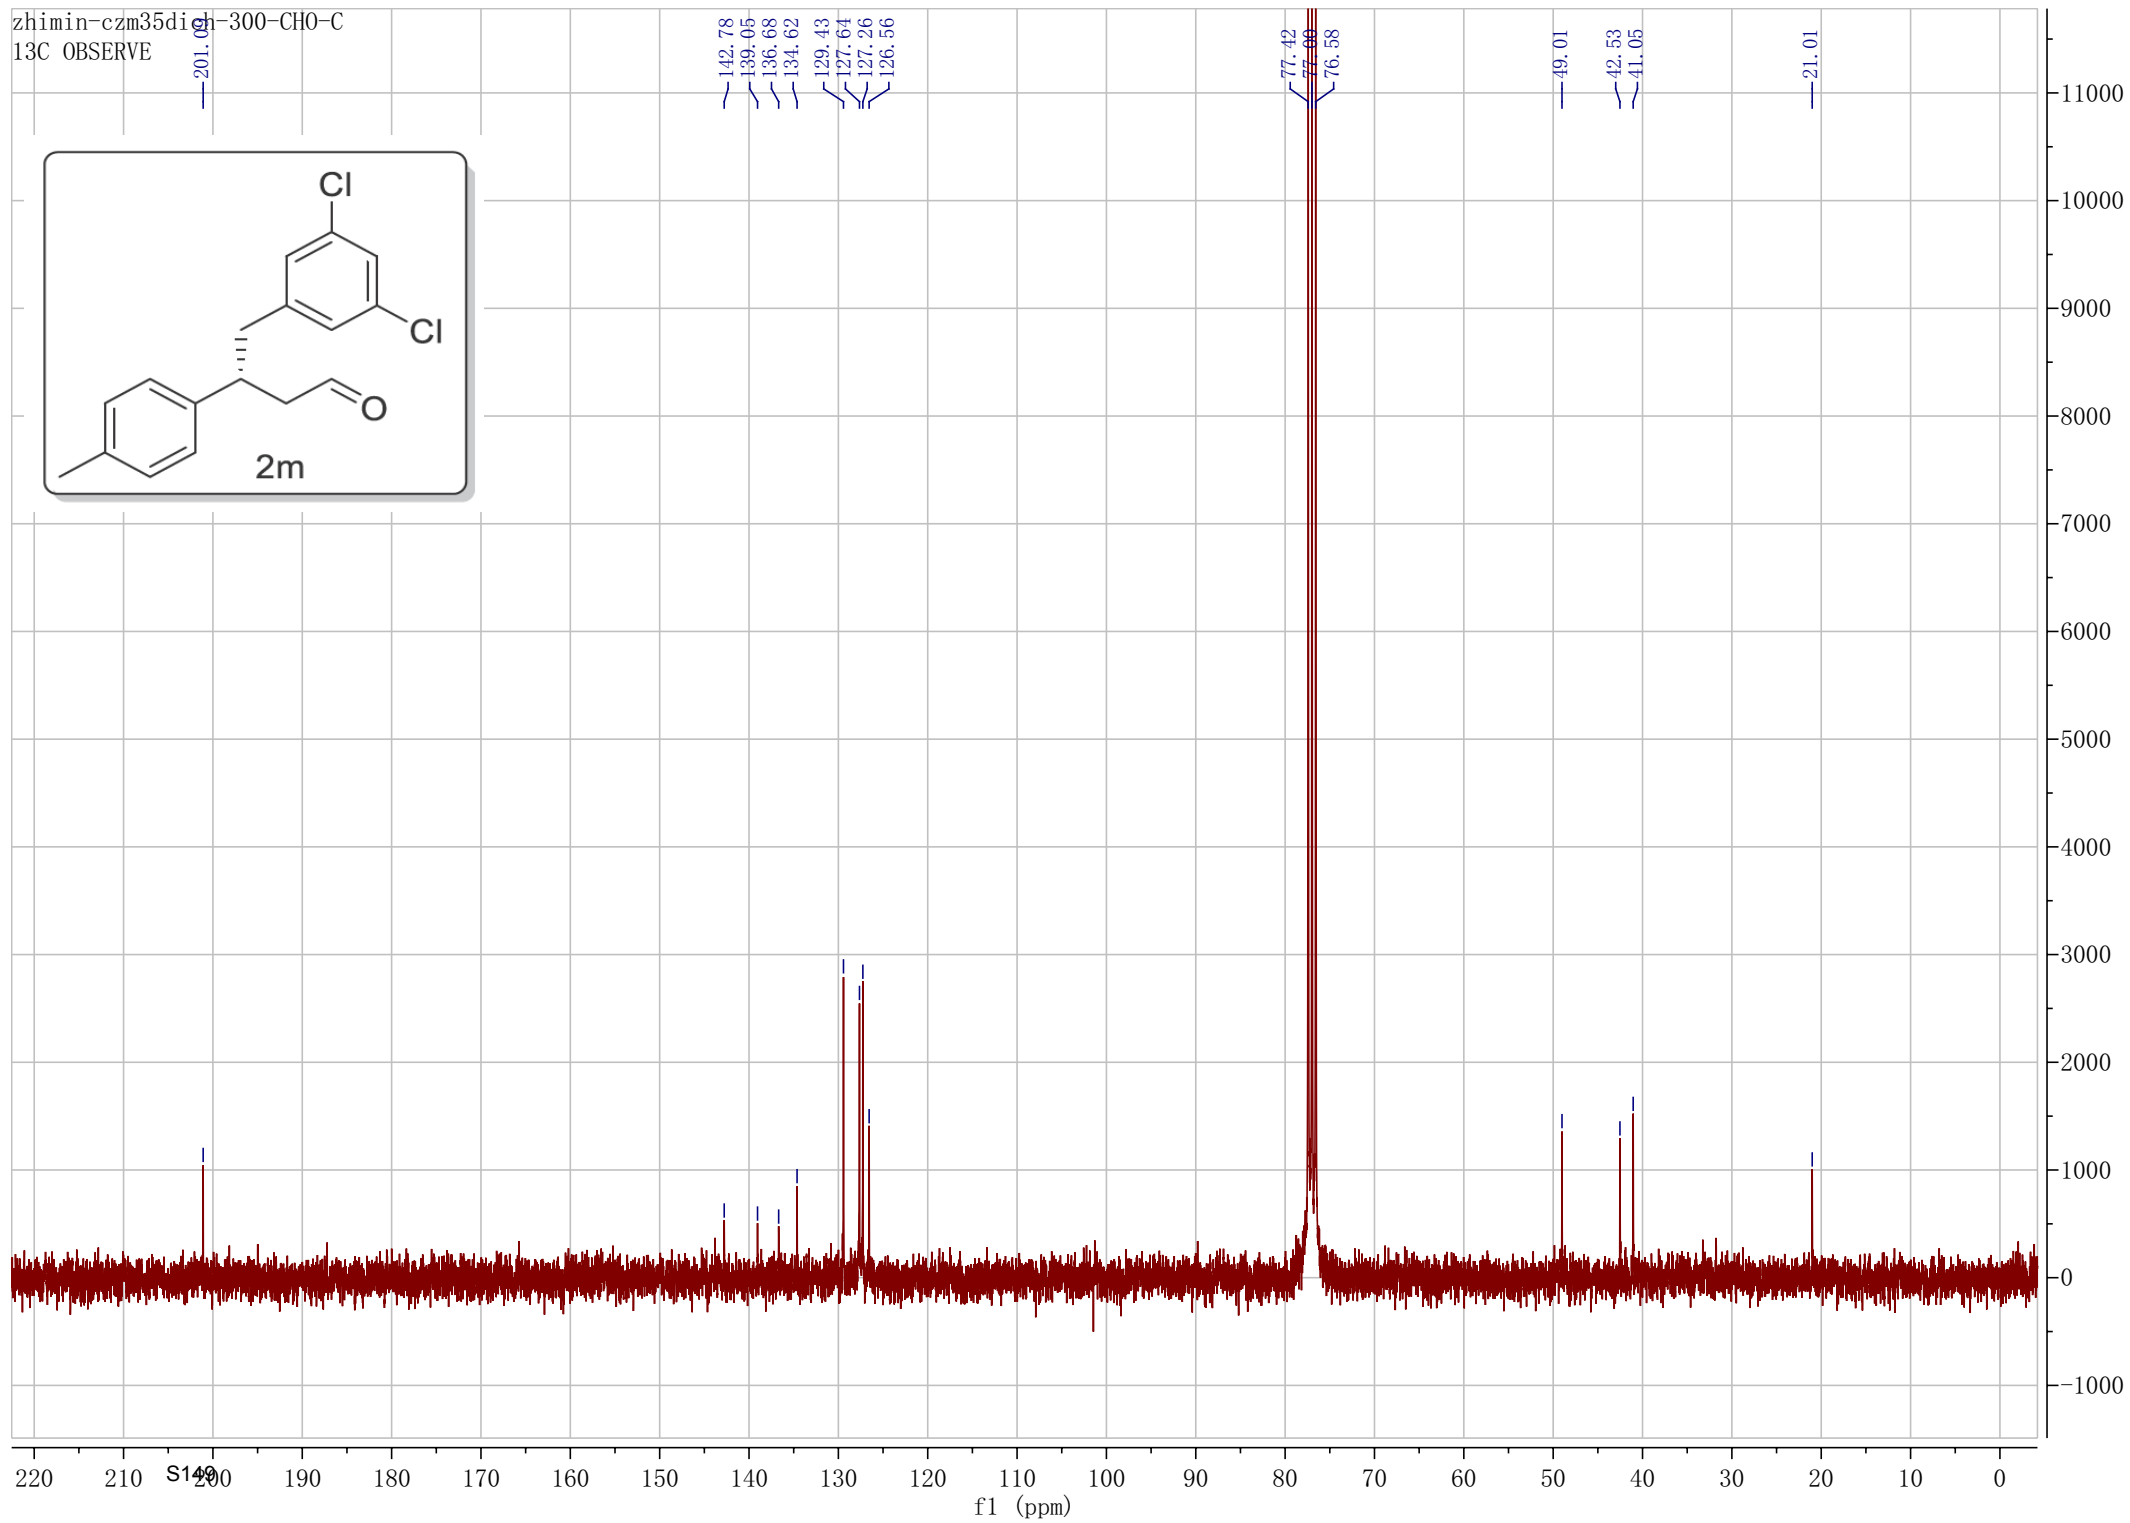

zhimin-czm312-OH-500-H  
STANDARD PROTON PARAMETERS

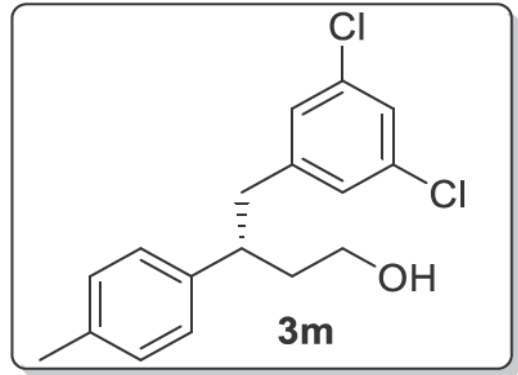

7.14  
7.10  
7.08  
7.01  
6.99  
6.91  
6.91

3.53  
3.44  
2.94  
2.84  
2.82  
2.31  
1.94  
1.93  
1.92  
1.91  
1.87  
1.86  
1.85  
1.84  
1.81  
1.11

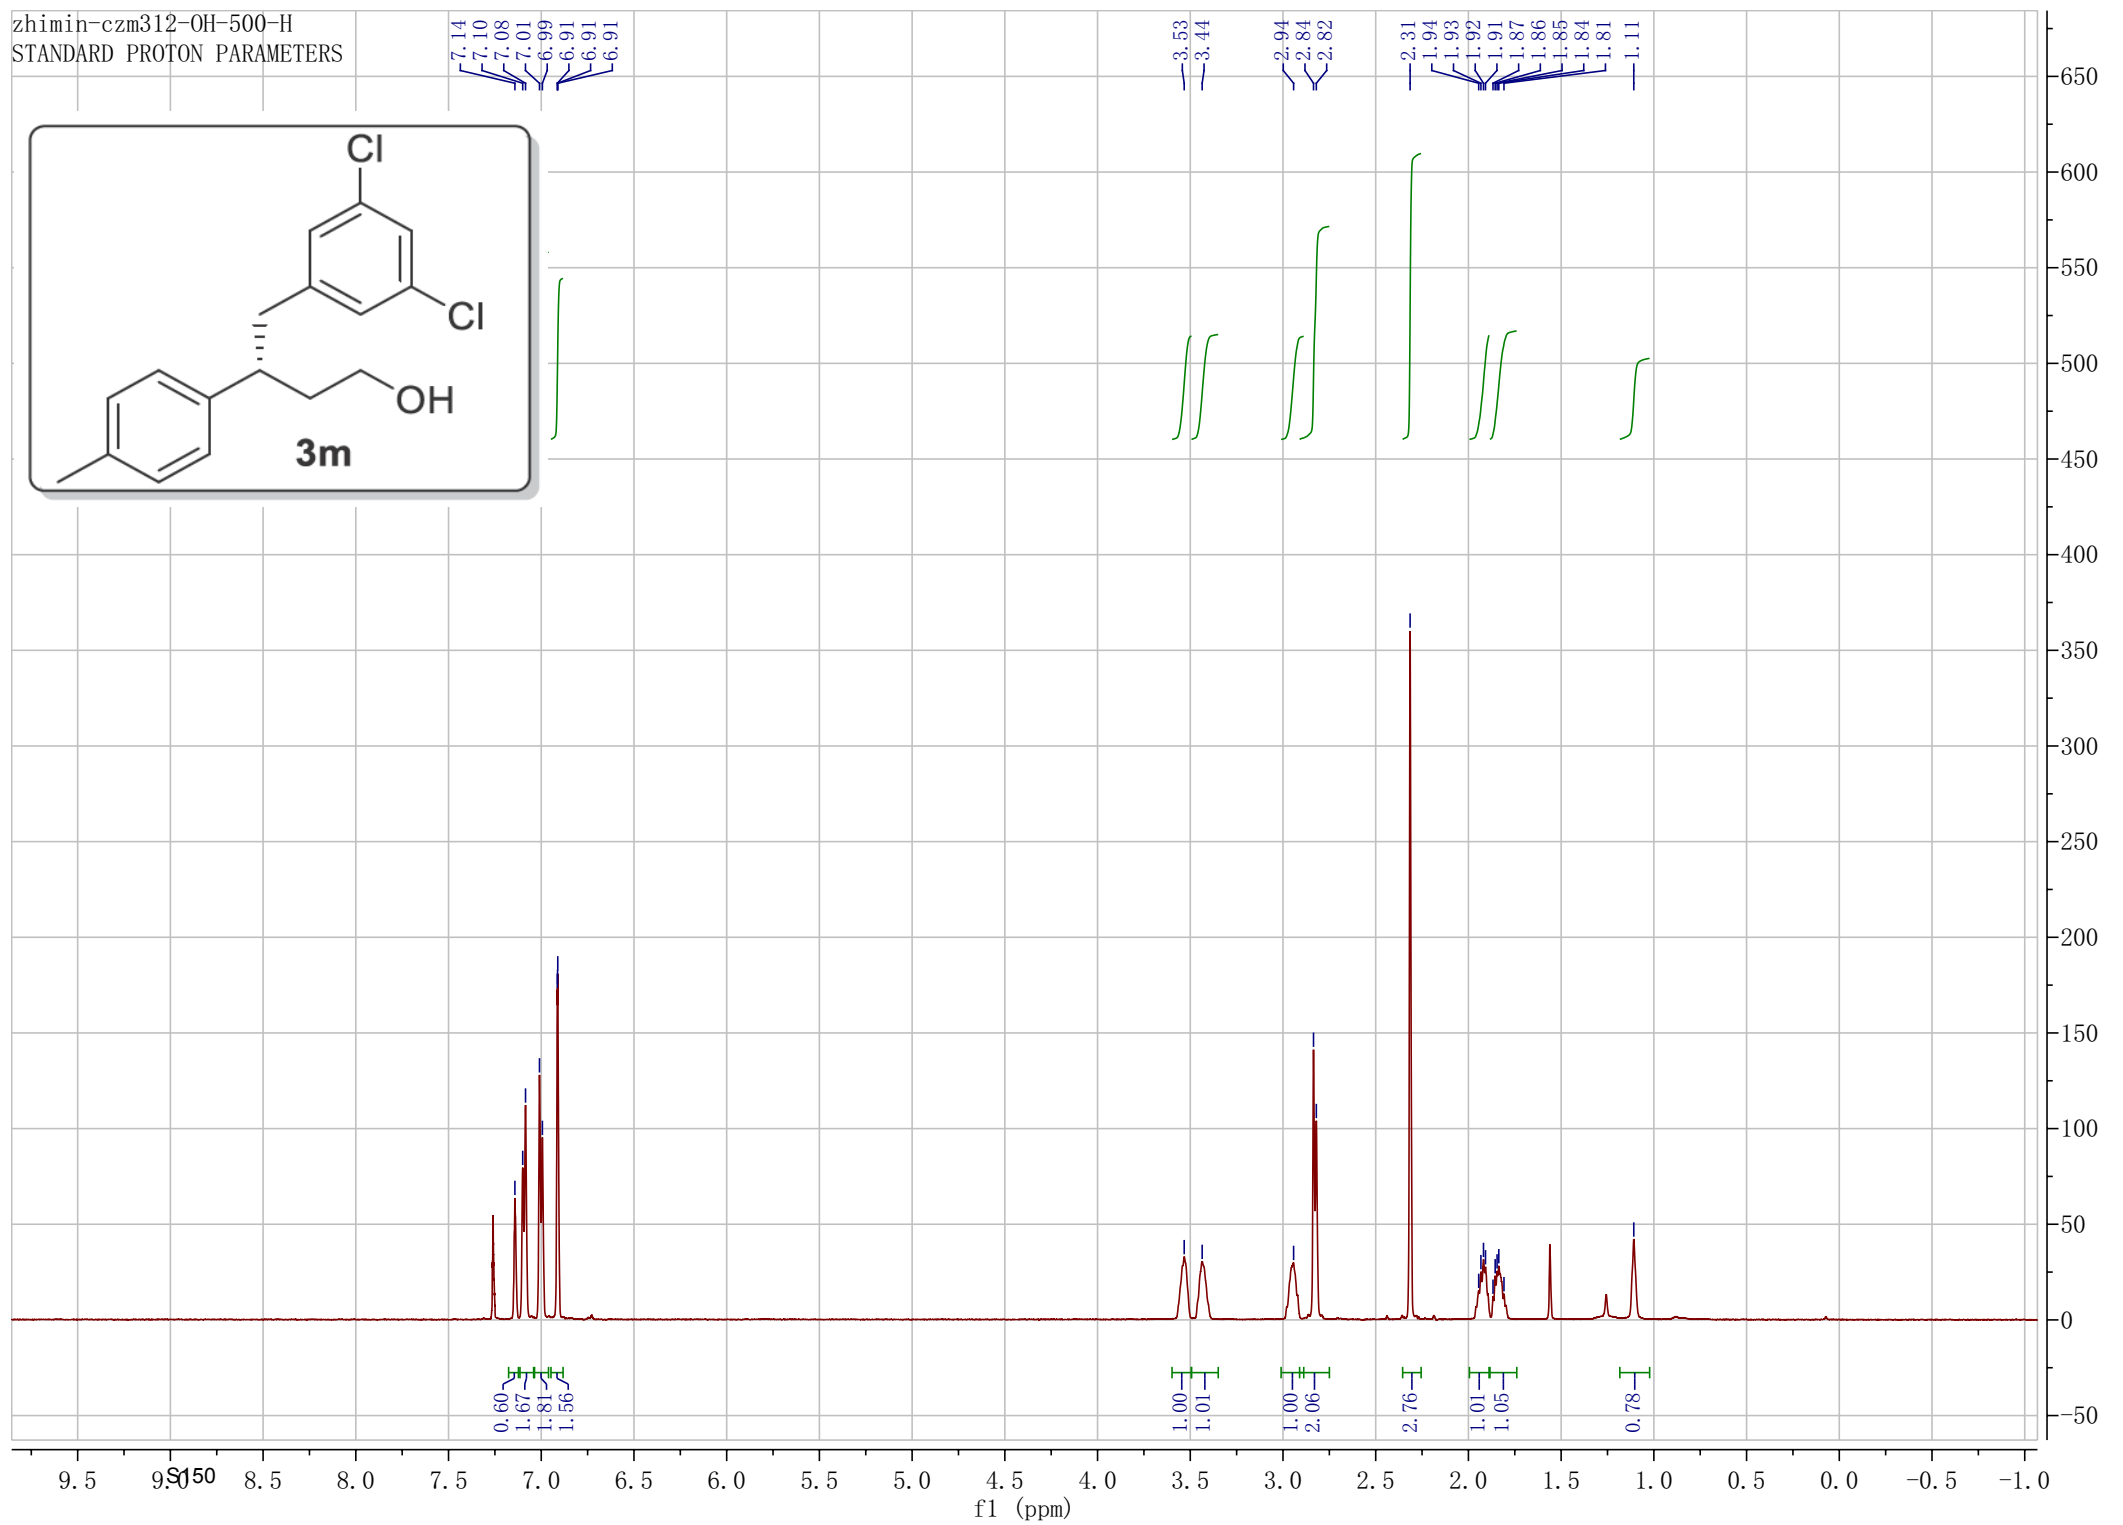

zhimin-czm312-OH-300-C  
13C OBSERVE

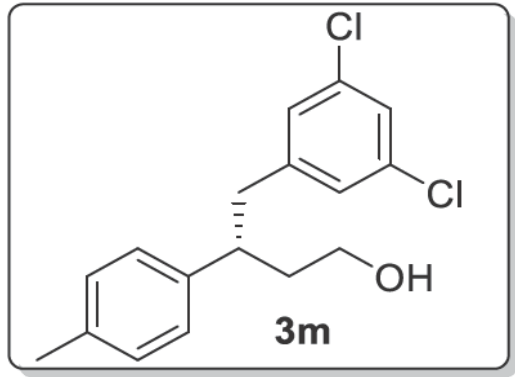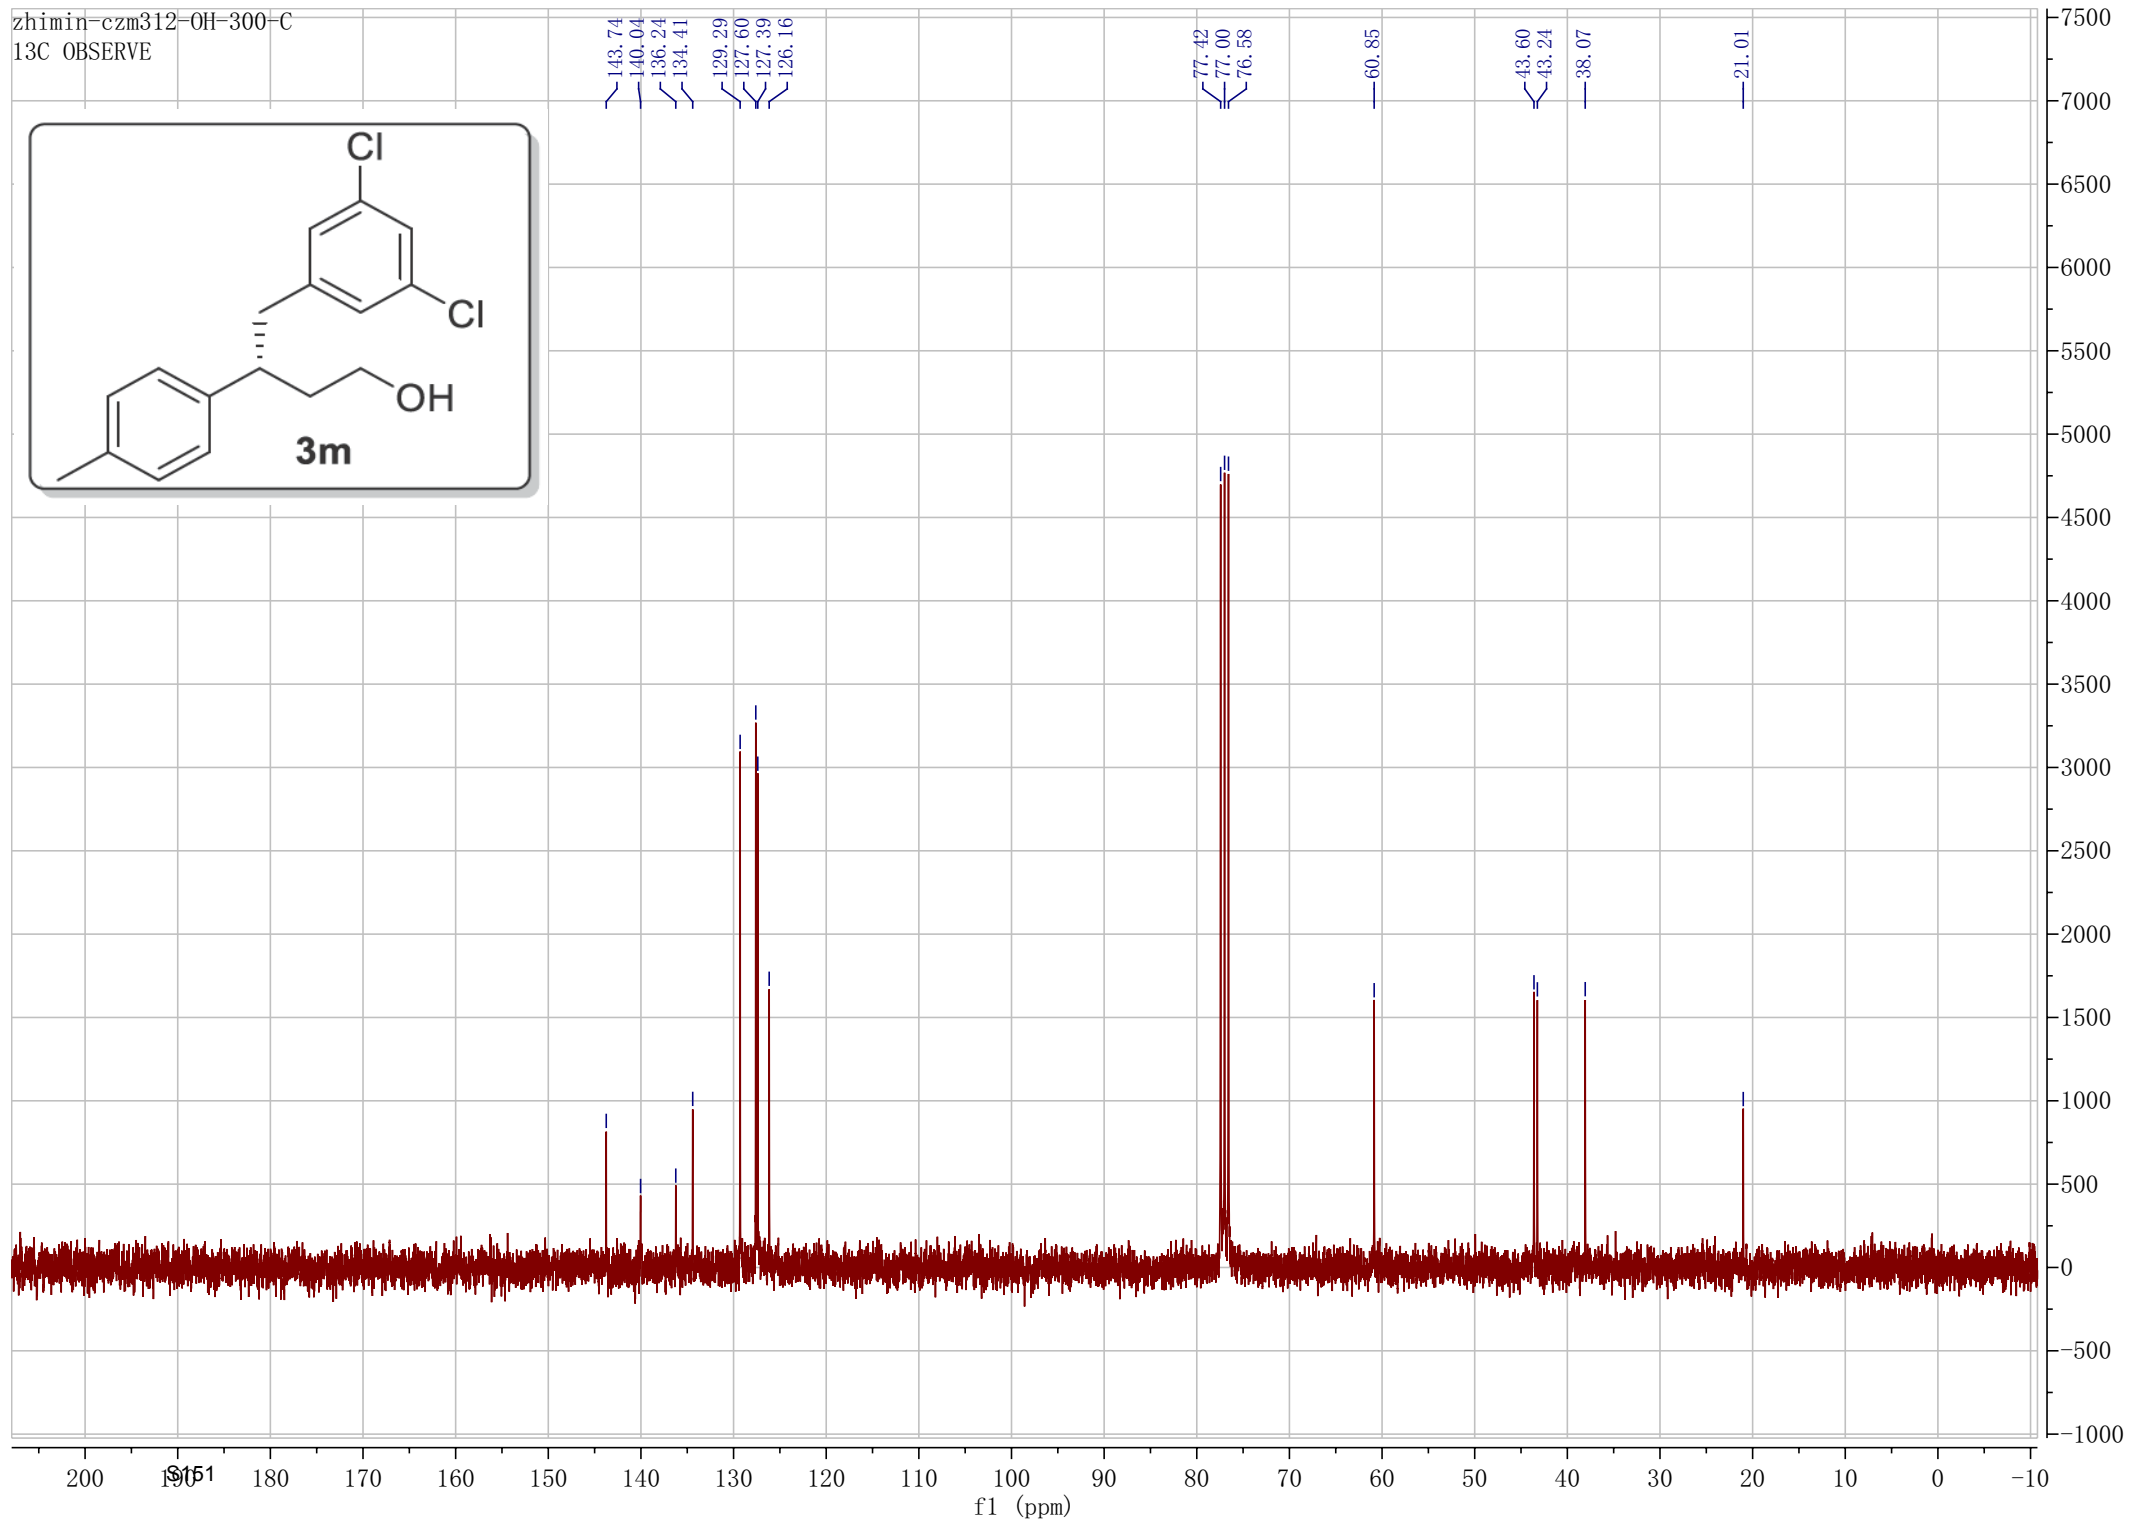

zhimin\_czm438-CHO-300-H  
Eo-Flatah Unity300 NMR  
STANDARD 1H OBSERVE

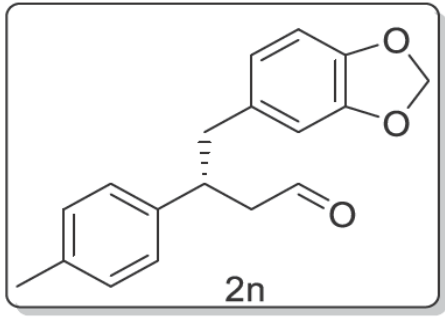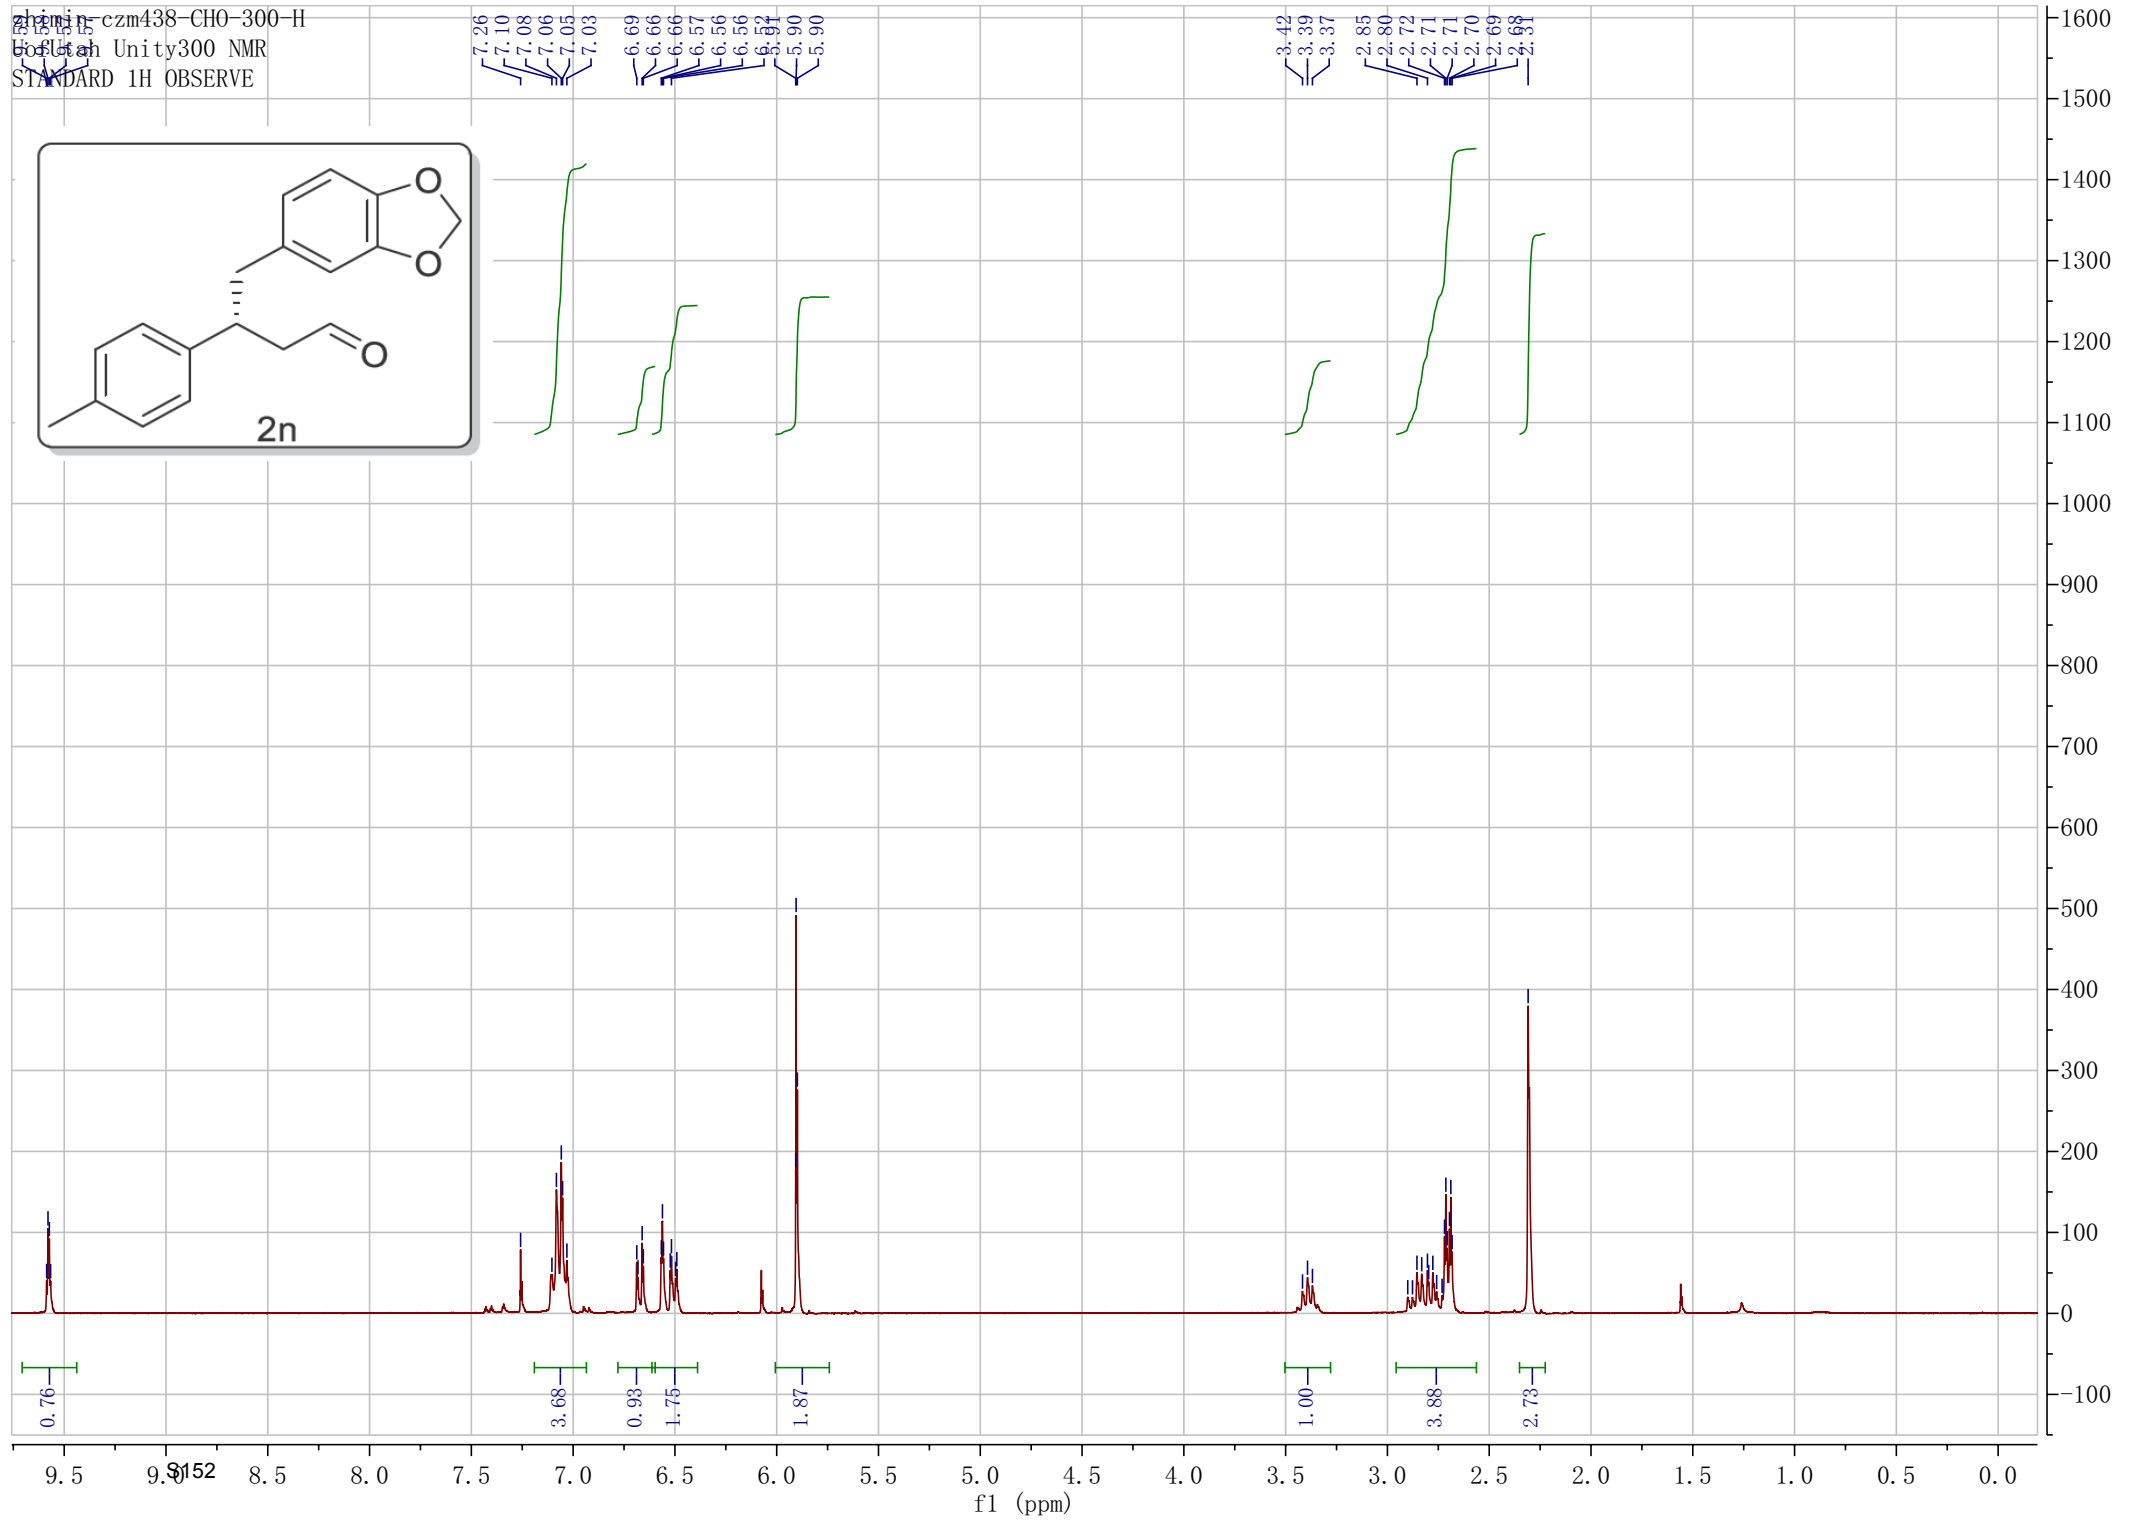

zhimin-czm438-CHO-300-C  
13C OBSERVE

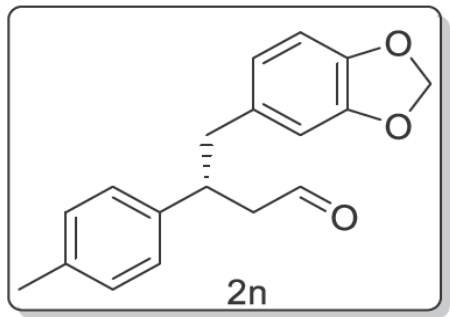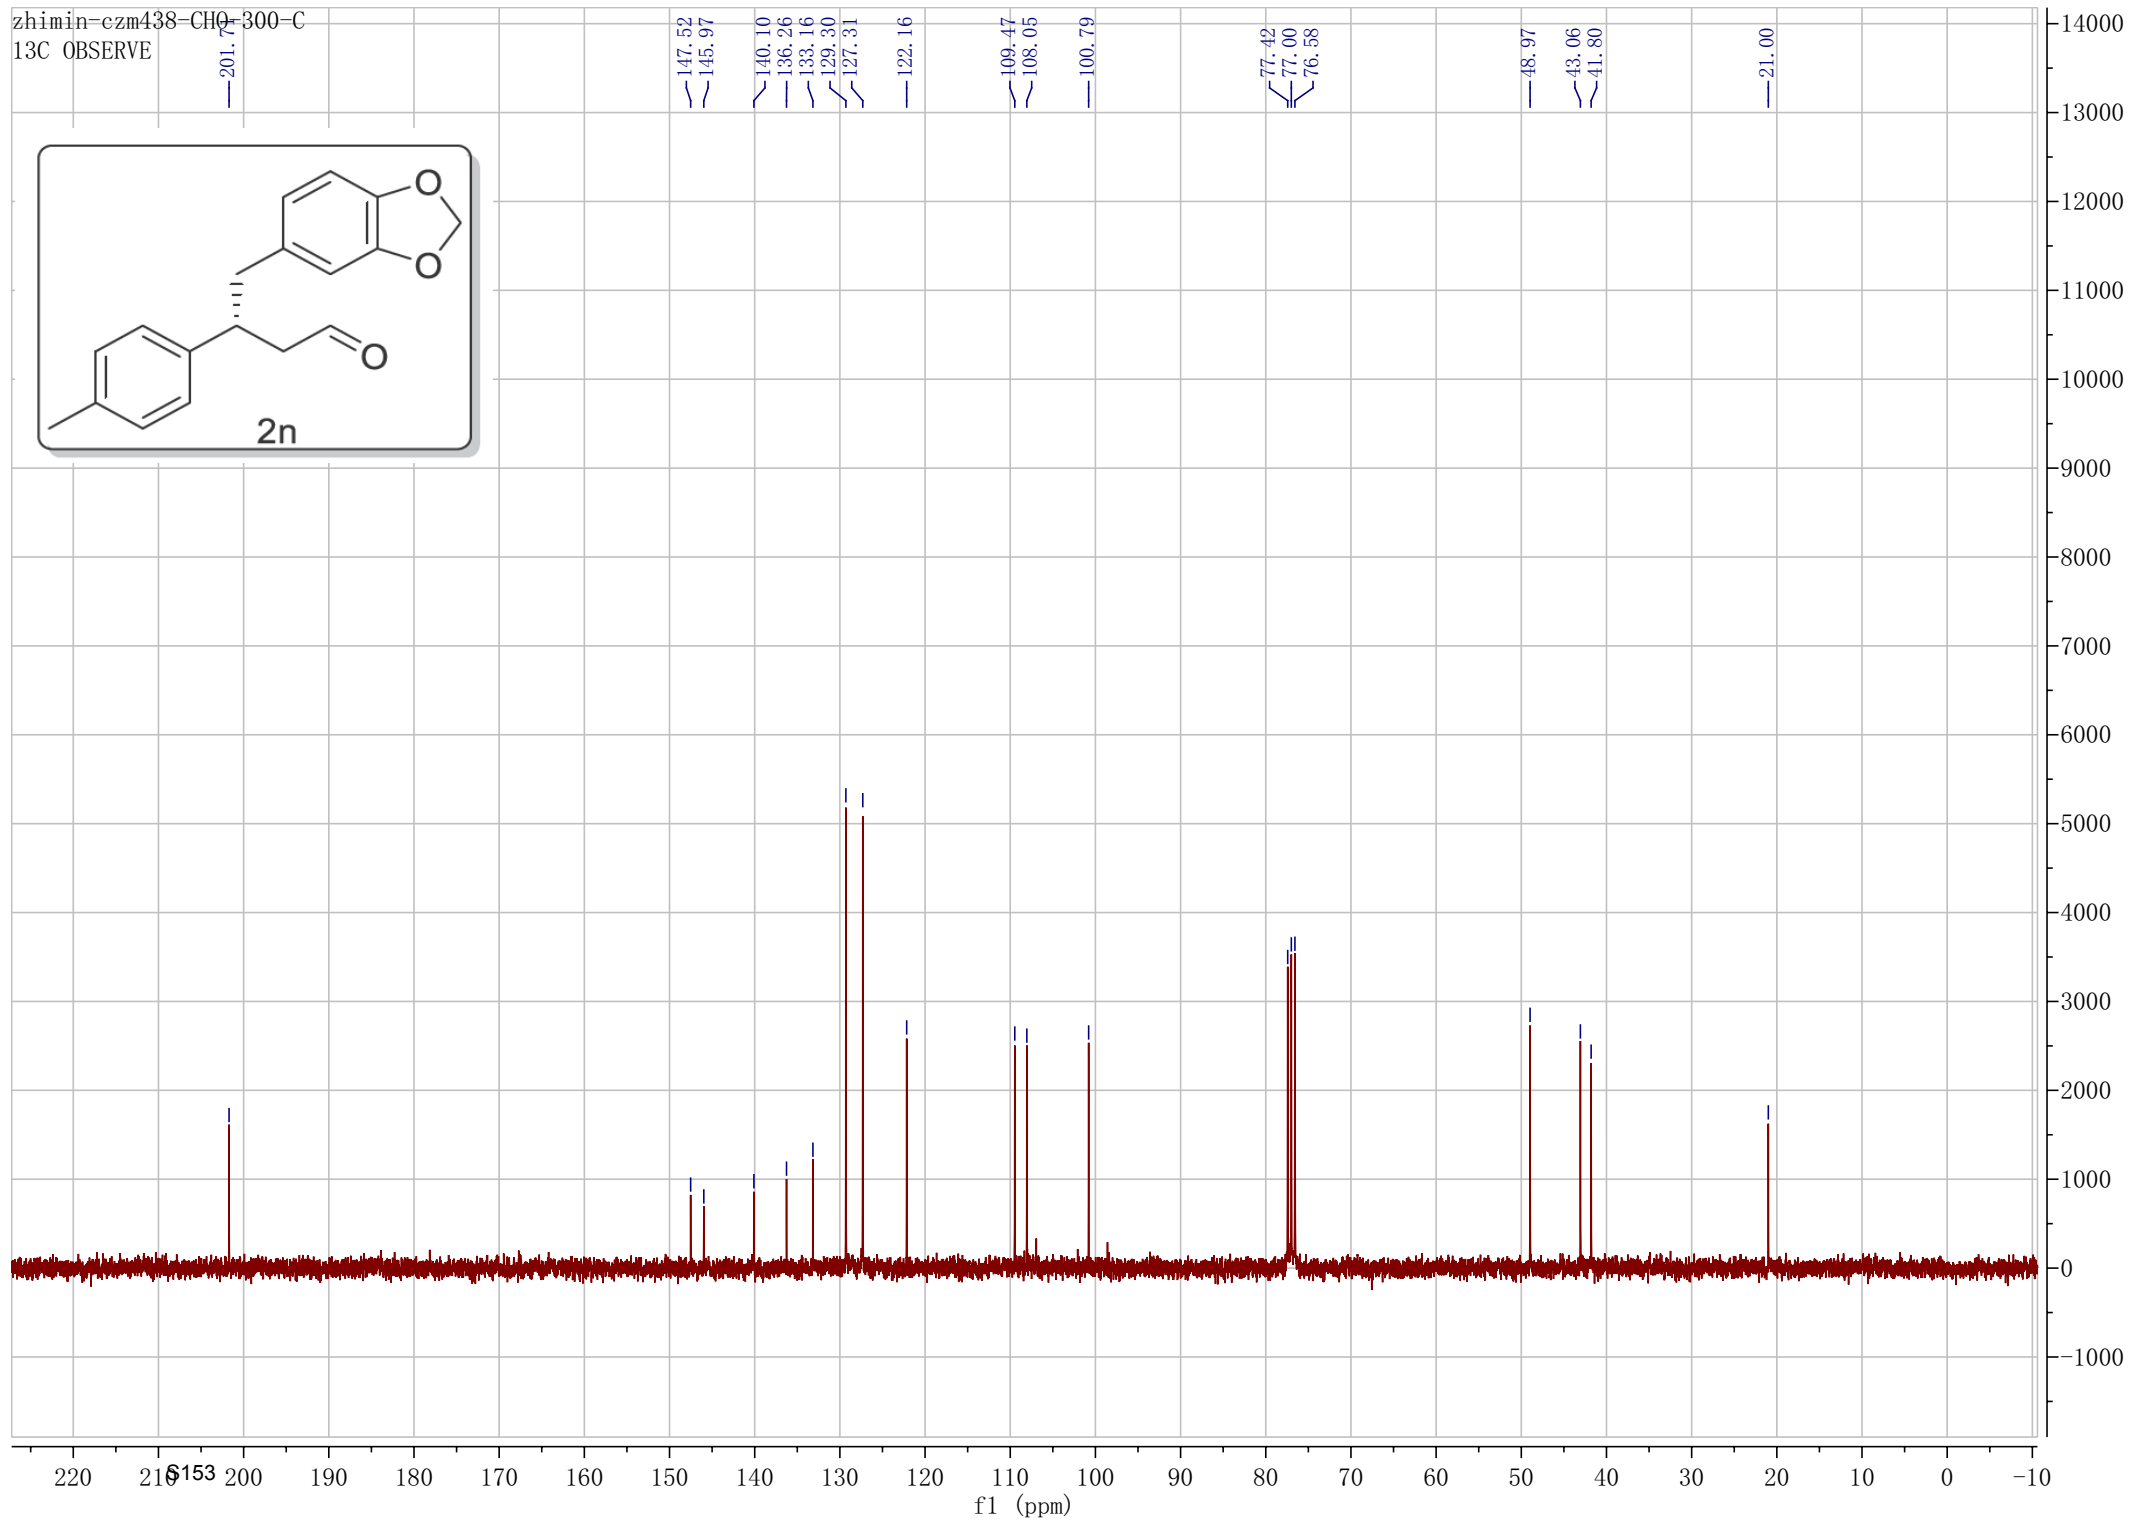

zhimin-czm354-OH-300-H  
UofUtah Unity300-NMR  
STANDARD 1H OBSERVE

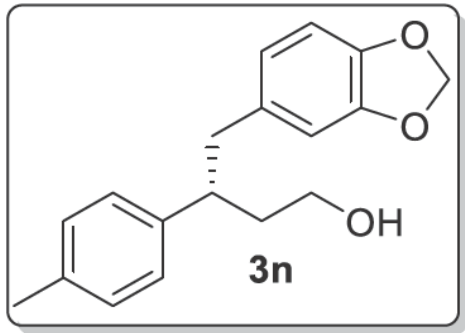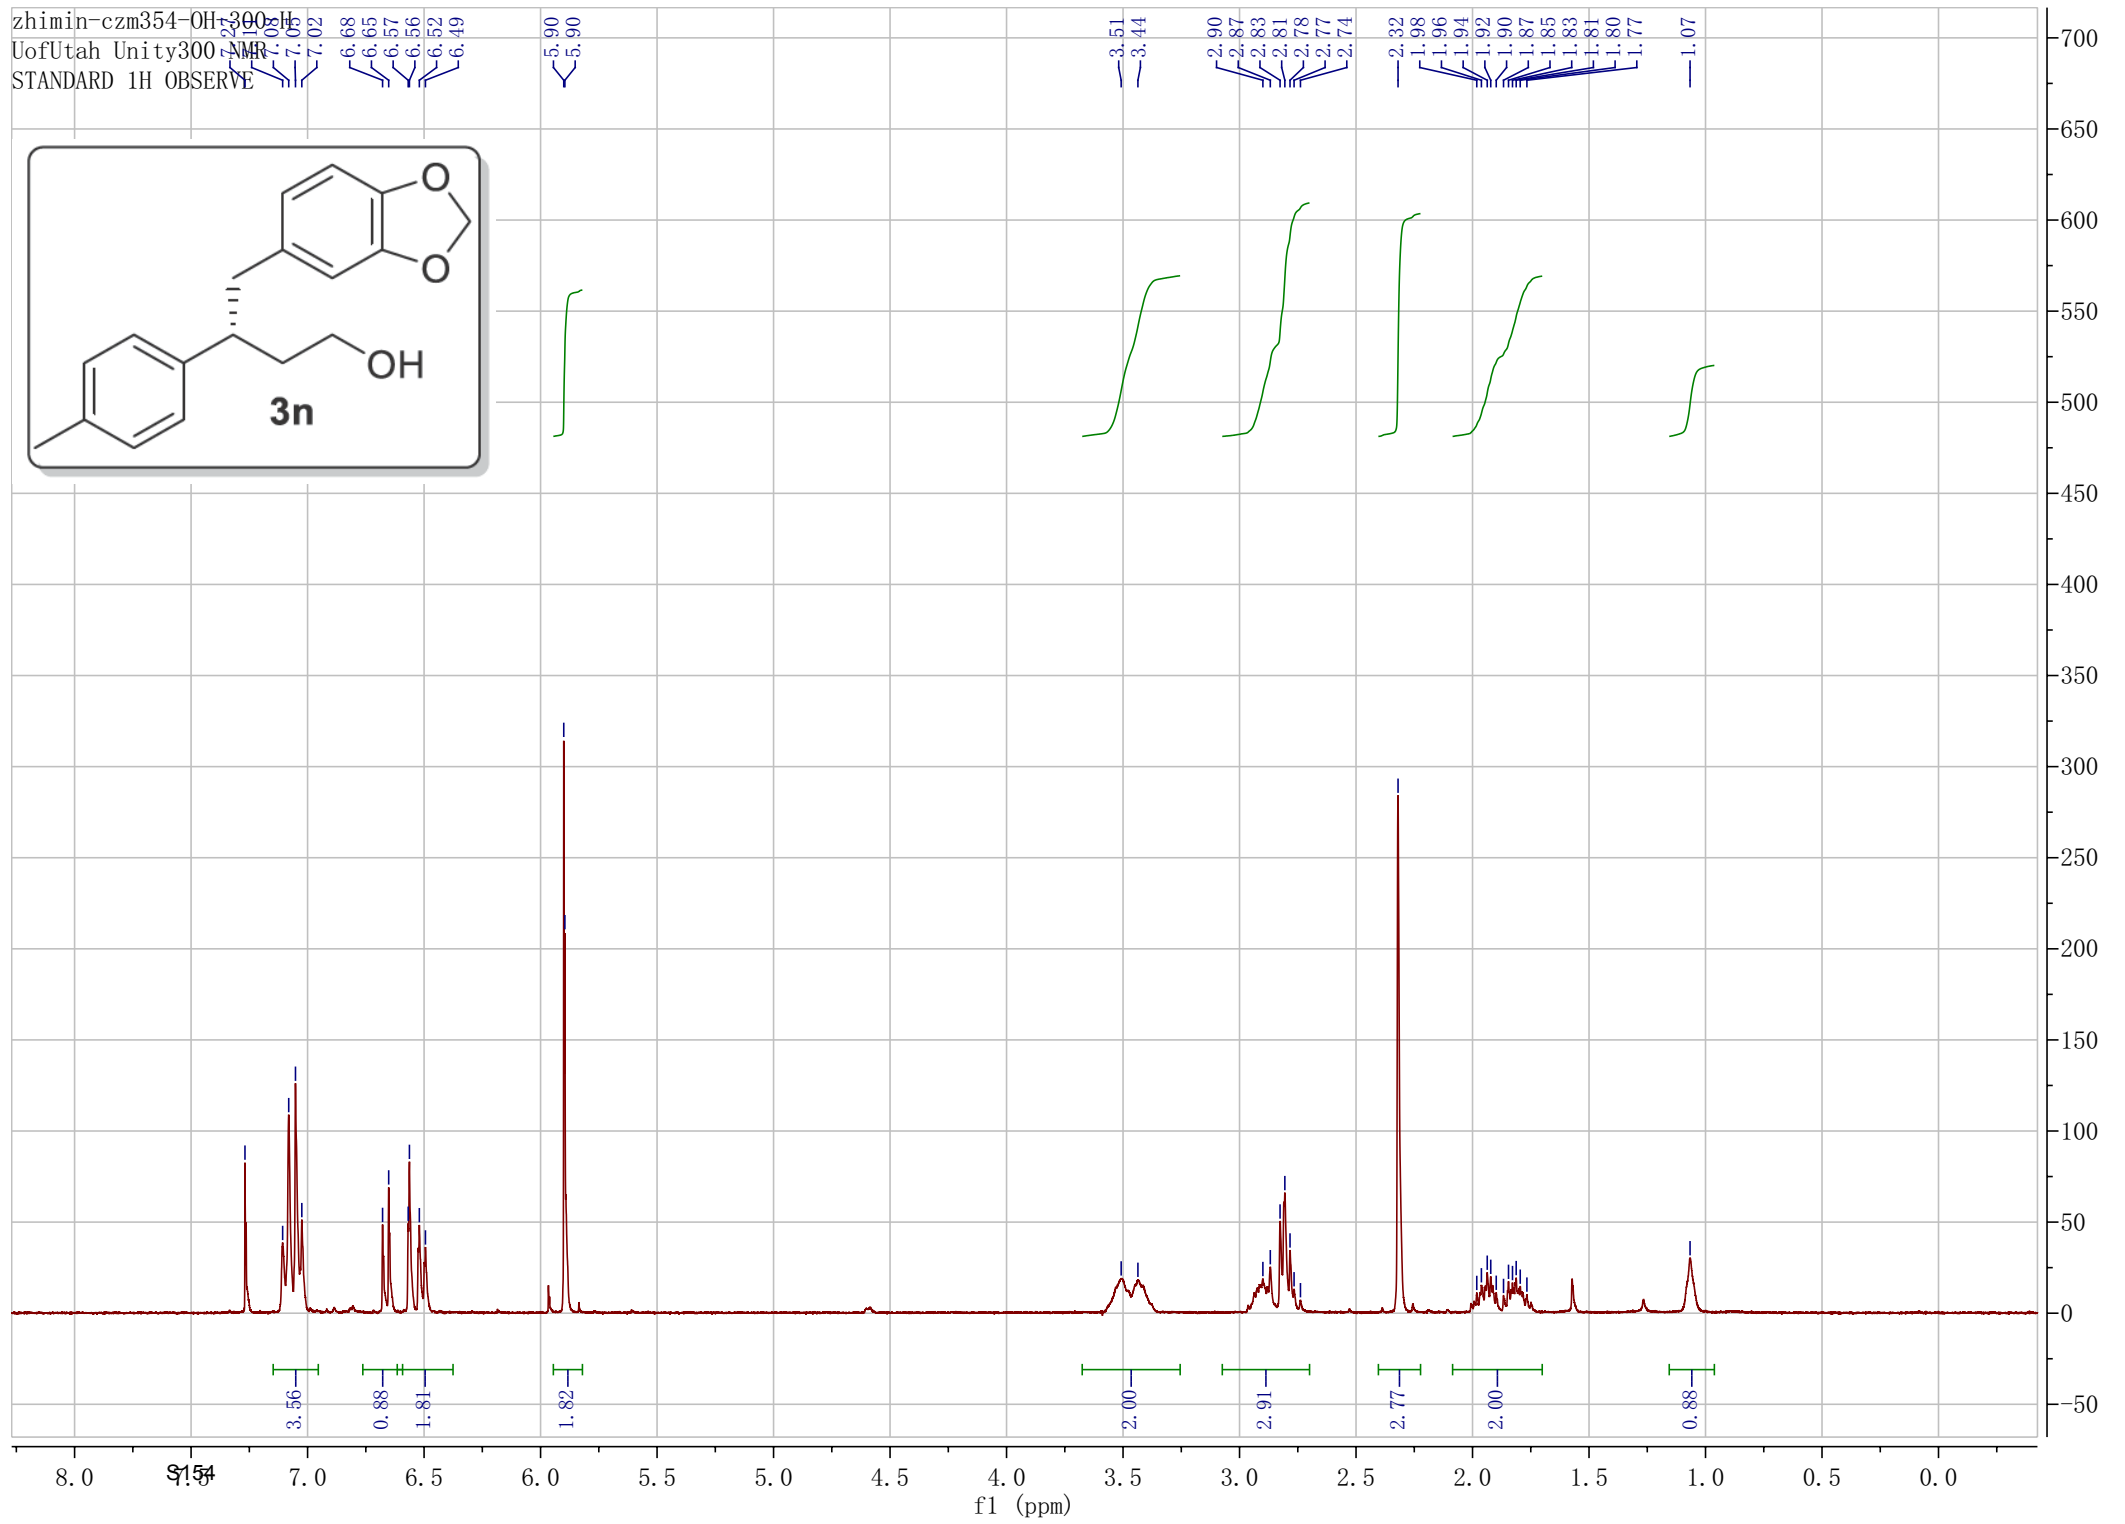



zhimin-czm354-OH-500-C  
STANDARD CARBON PARAMETERS

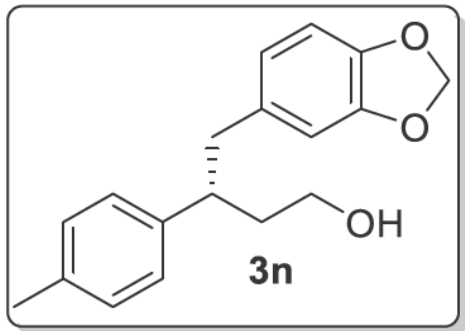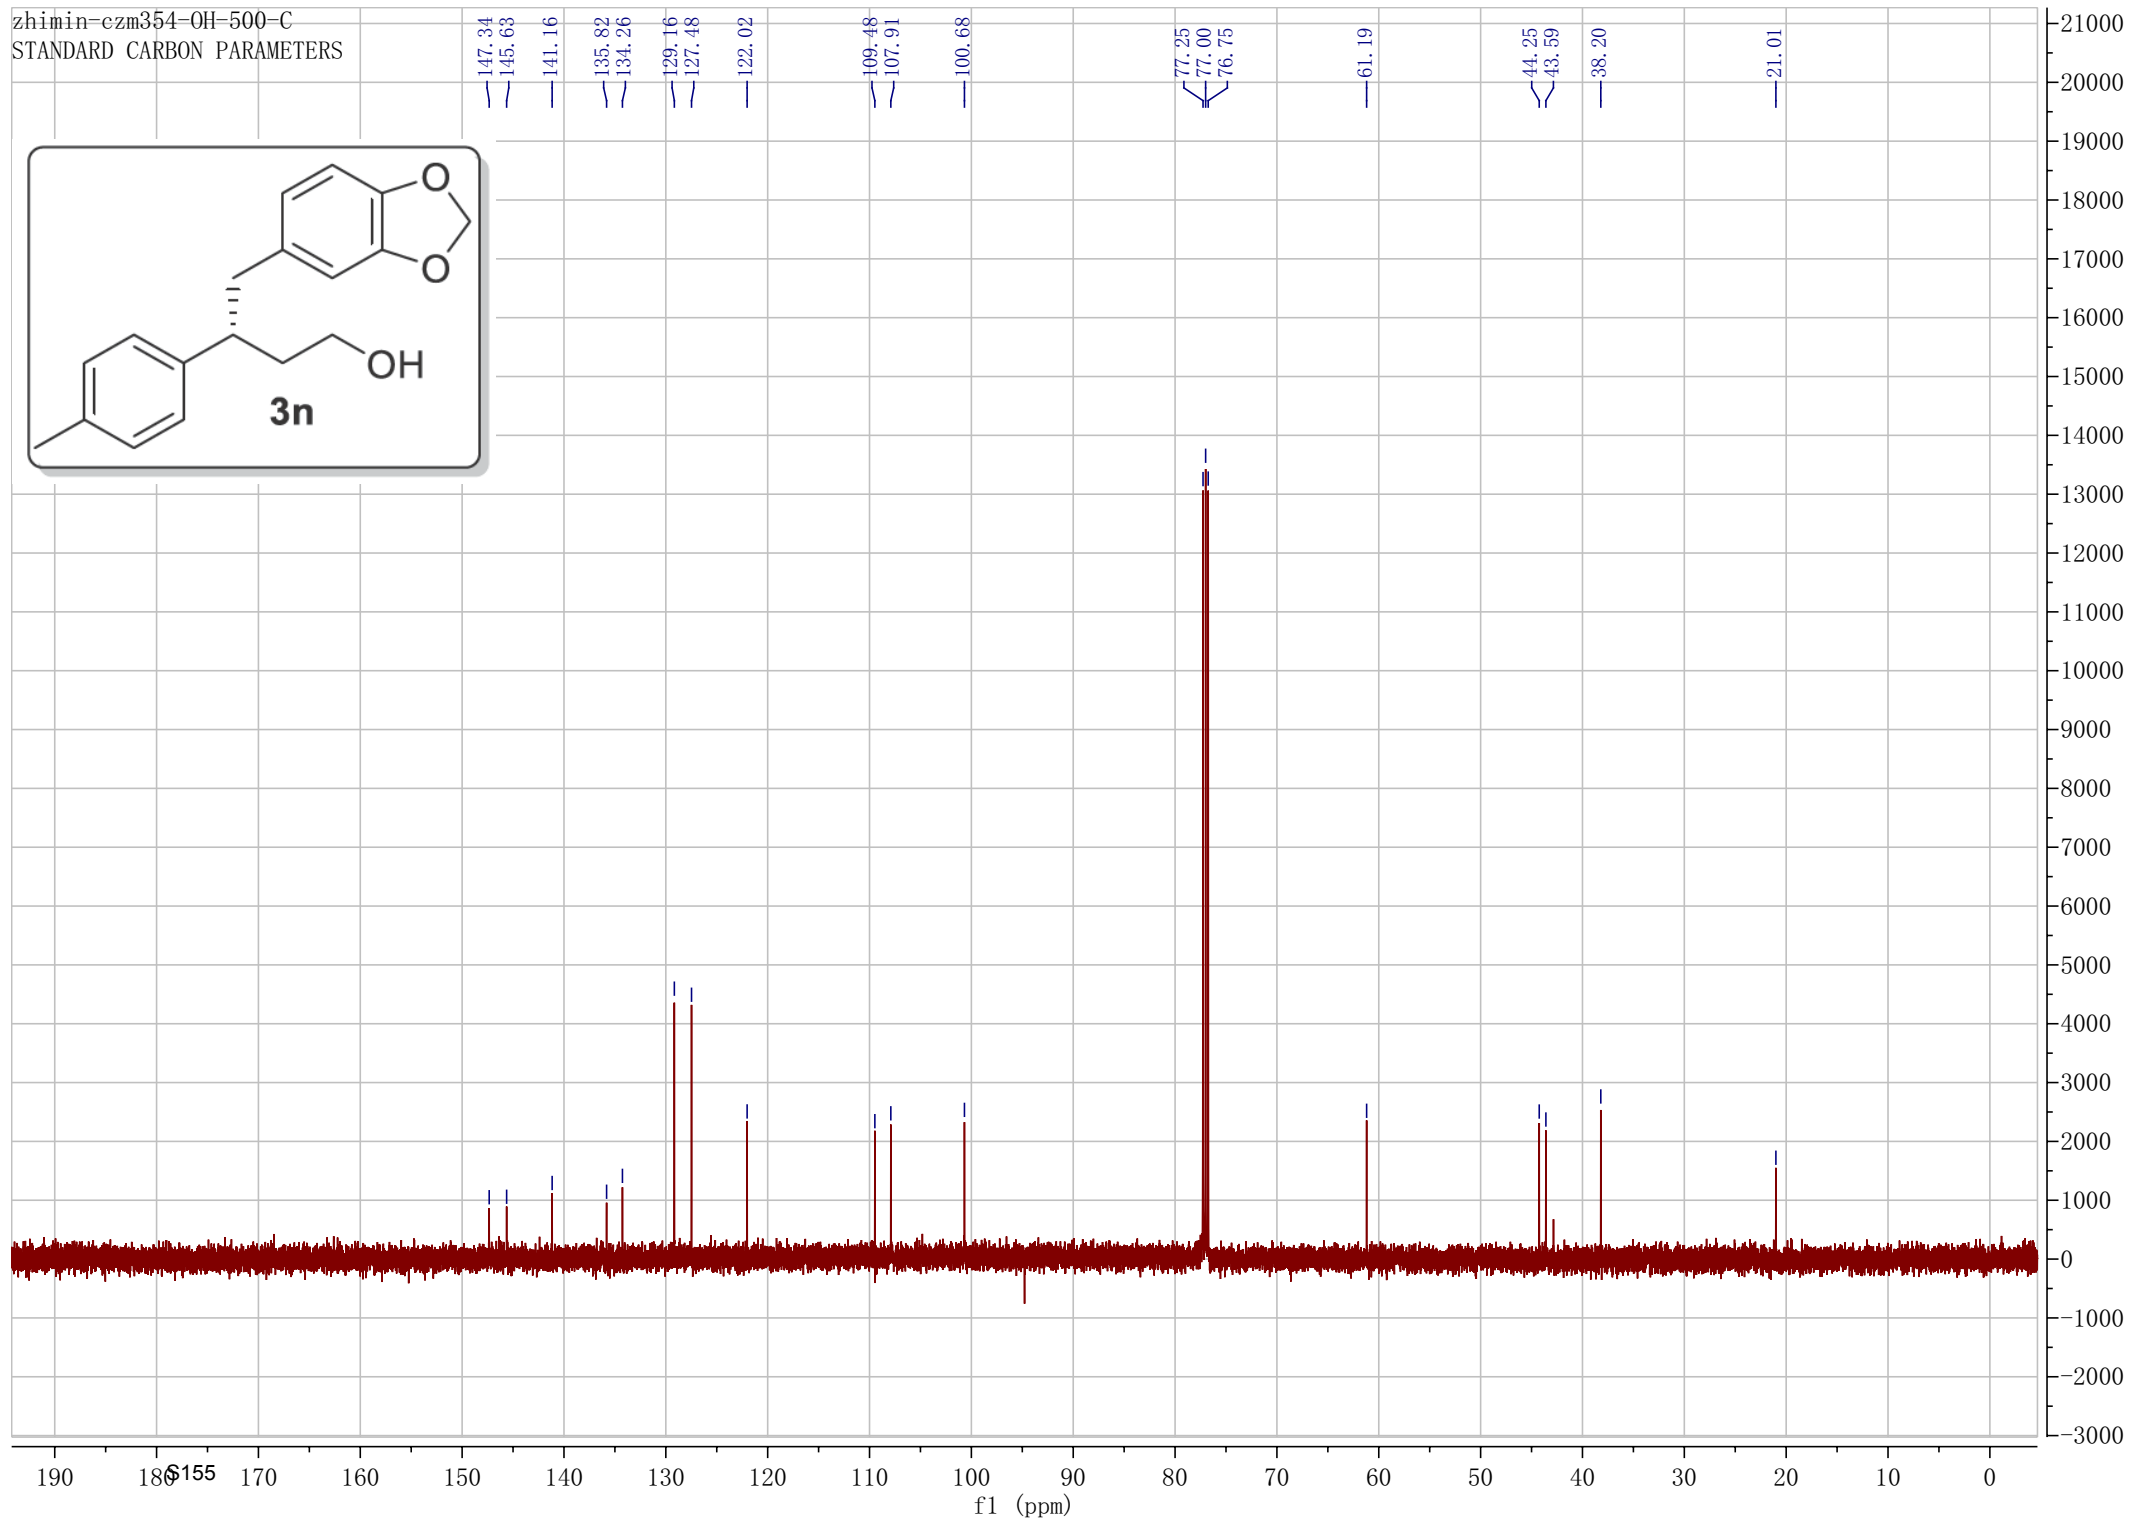

z:\min\zms33-CHO-300-H  
US-FLUOR-Entity-300-NMR  
STANDARD-1H-OBSERVE

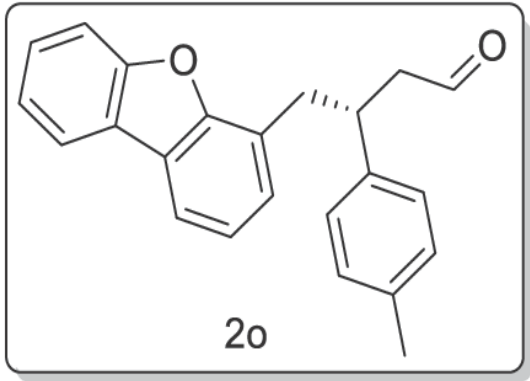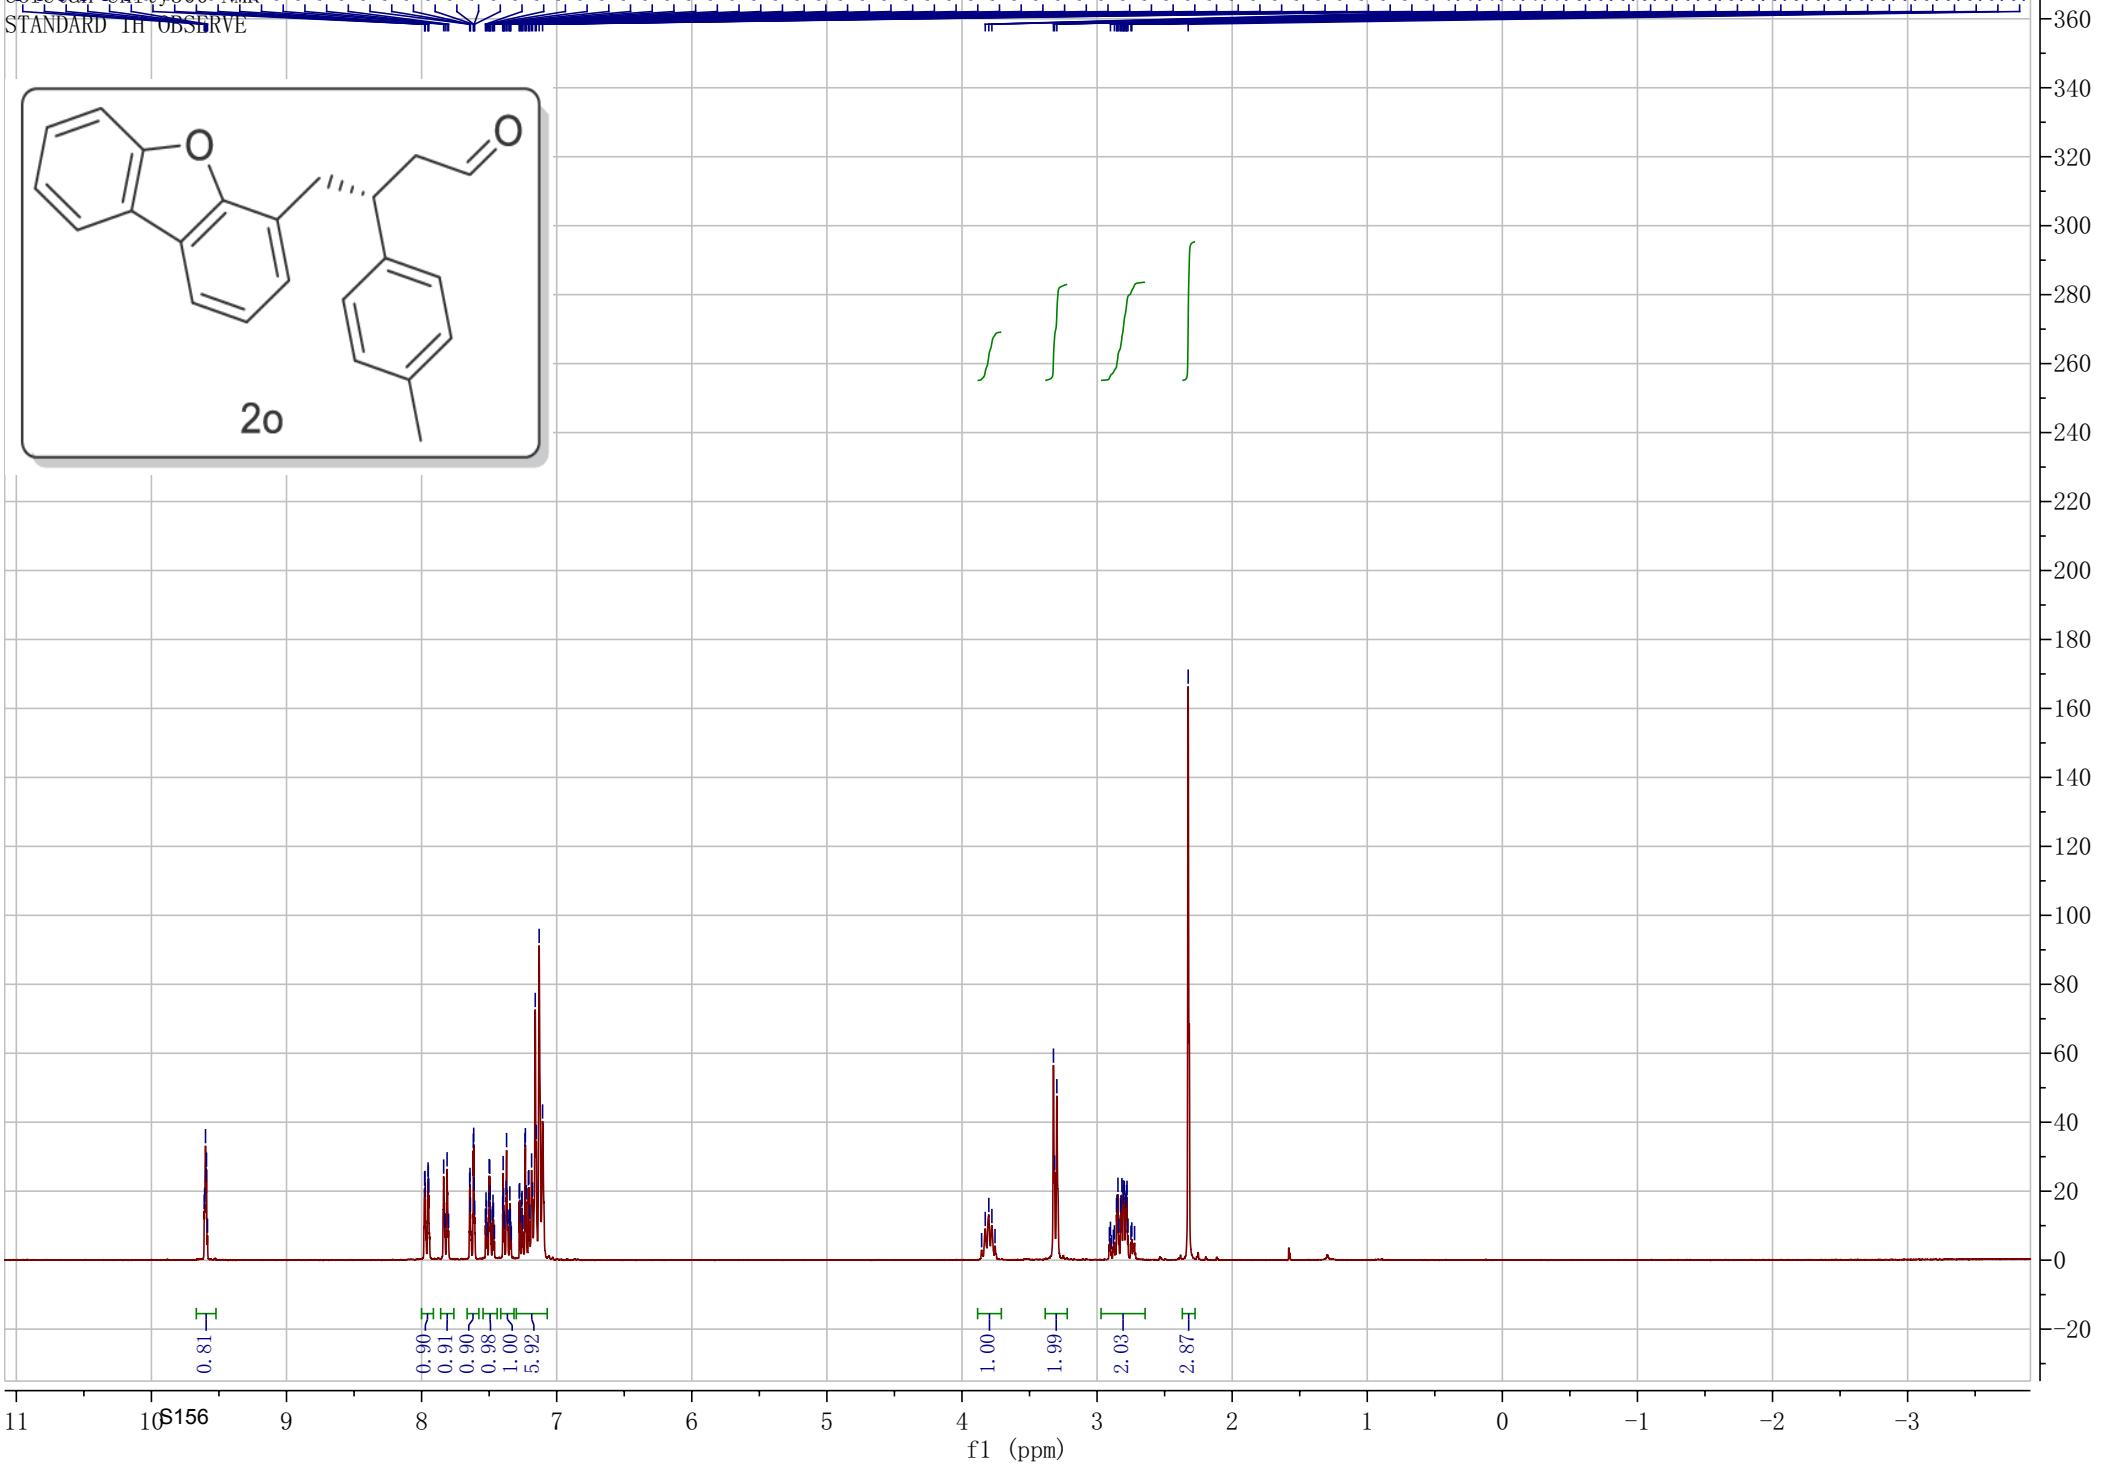

zhimin-czm333-CHO-300-C  
13C OBSERVE

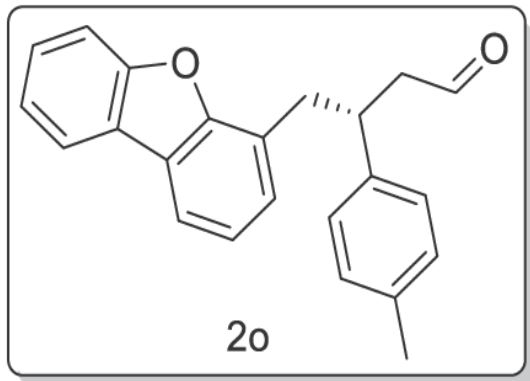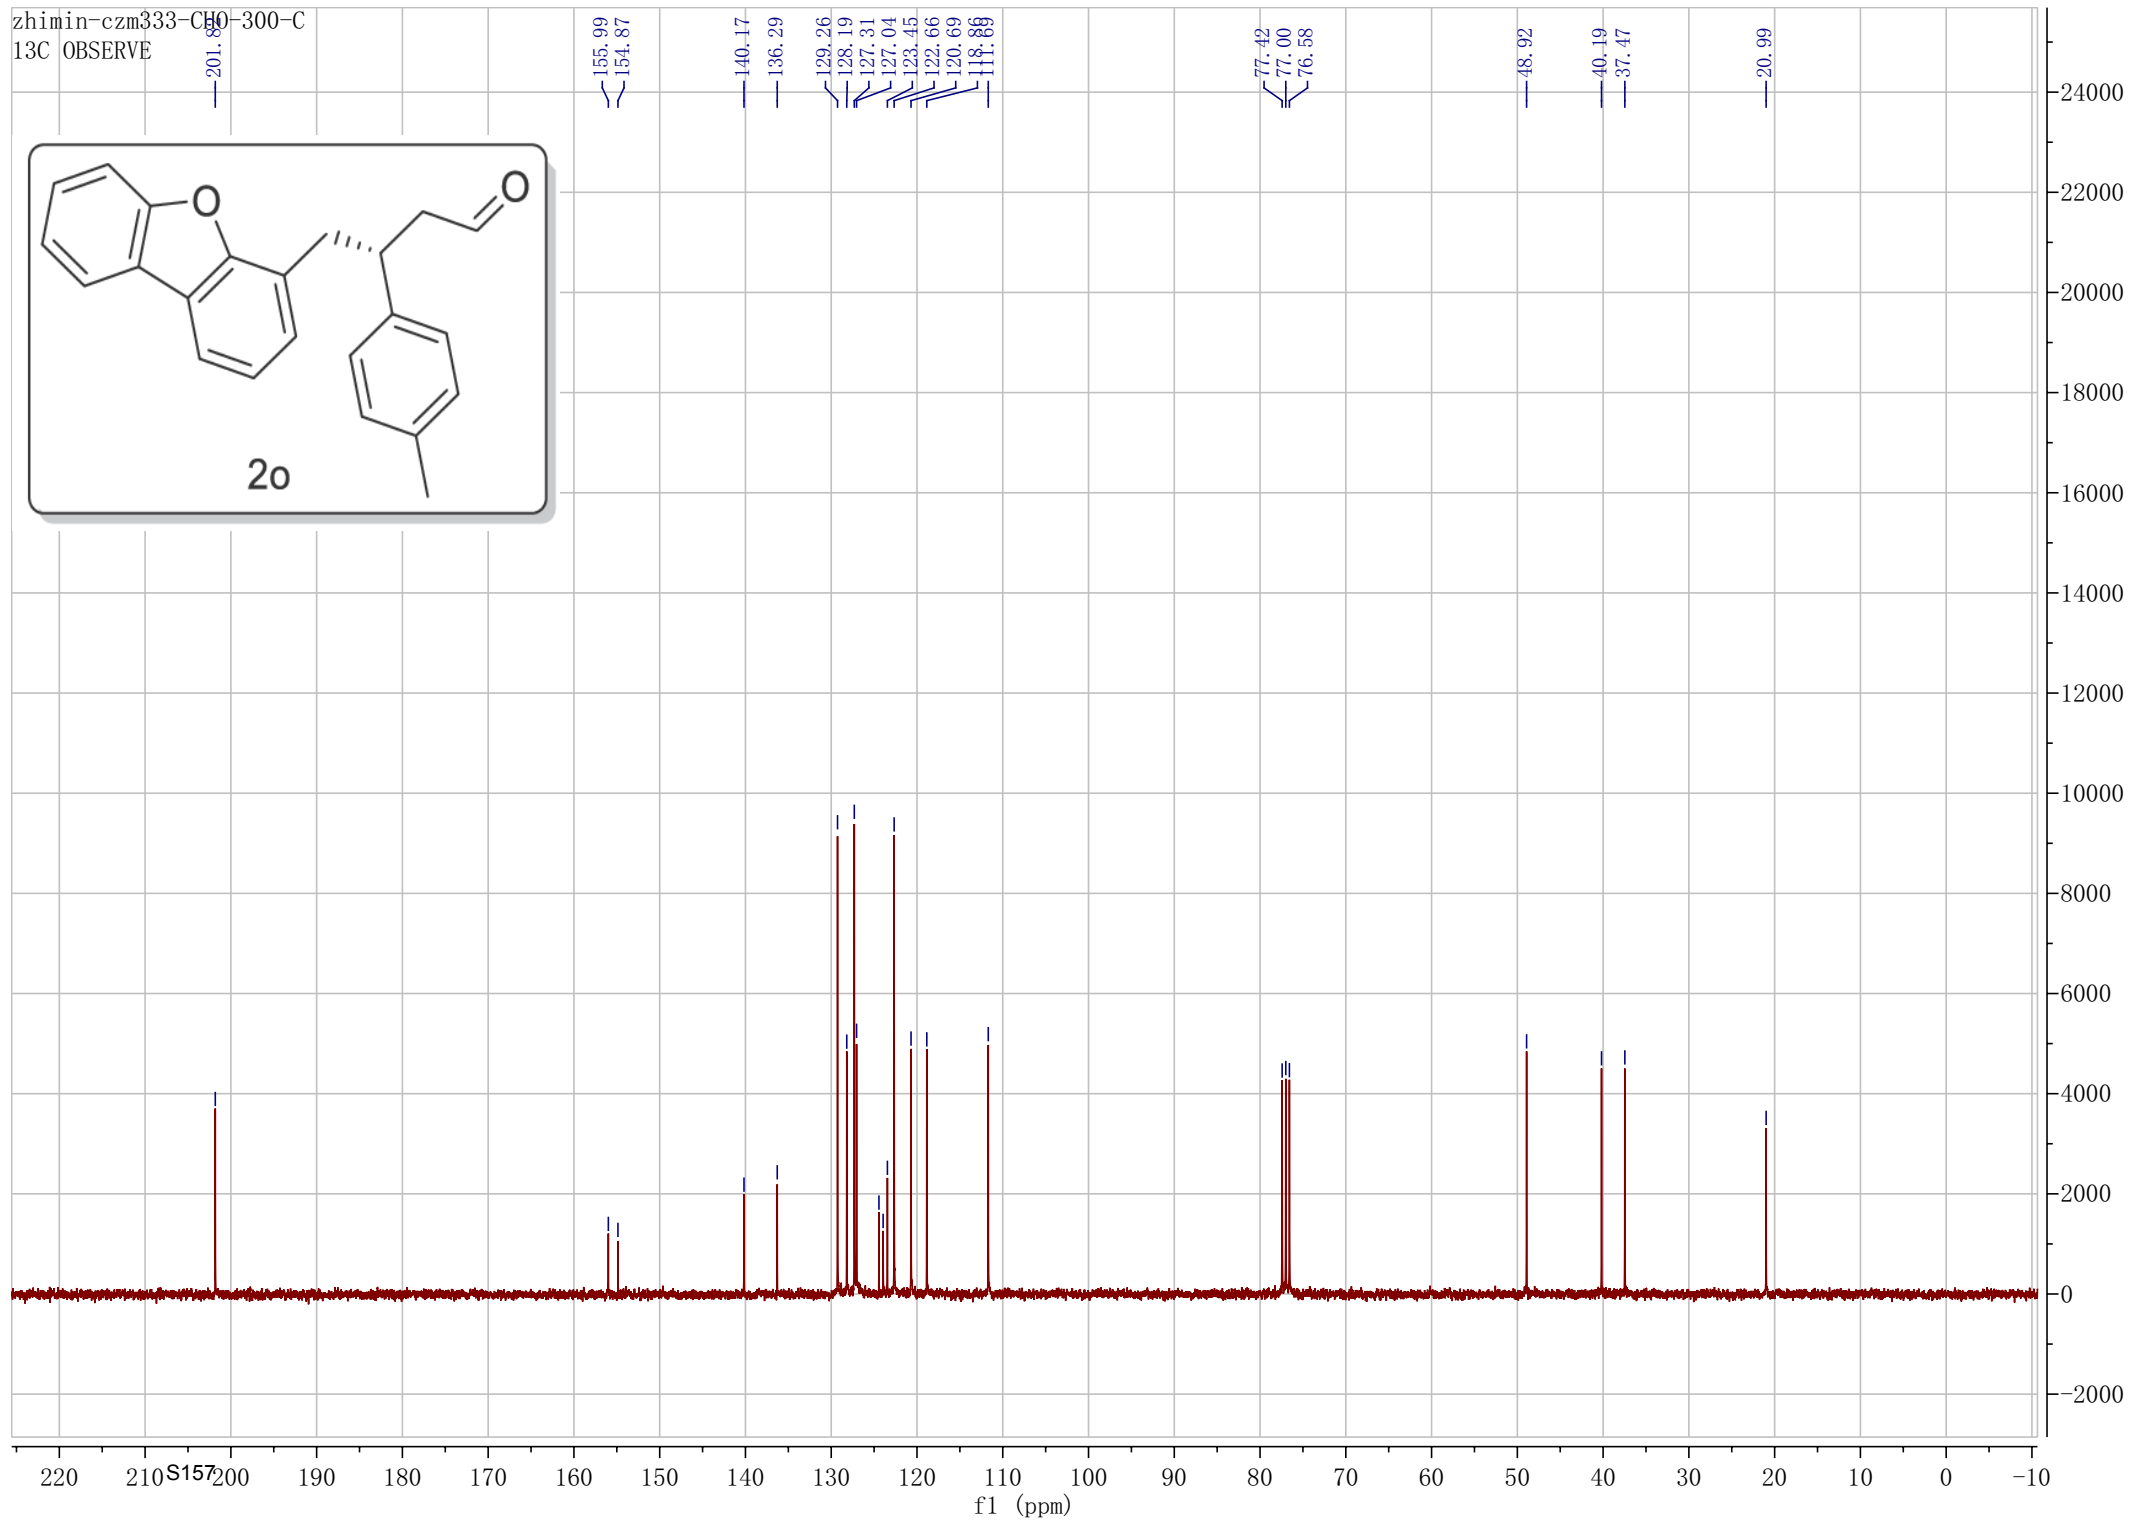

zhimin-czm333-OH-300-H  
UofUtah Unity300-NMR  
STANDARD 1H OBSERVE

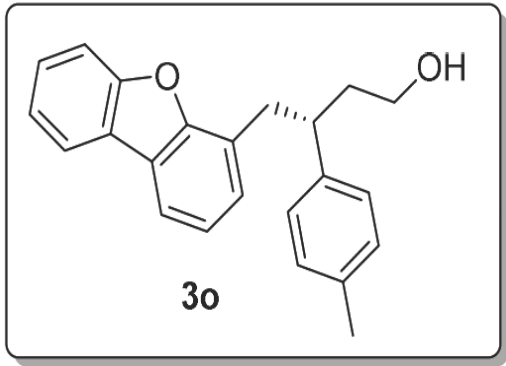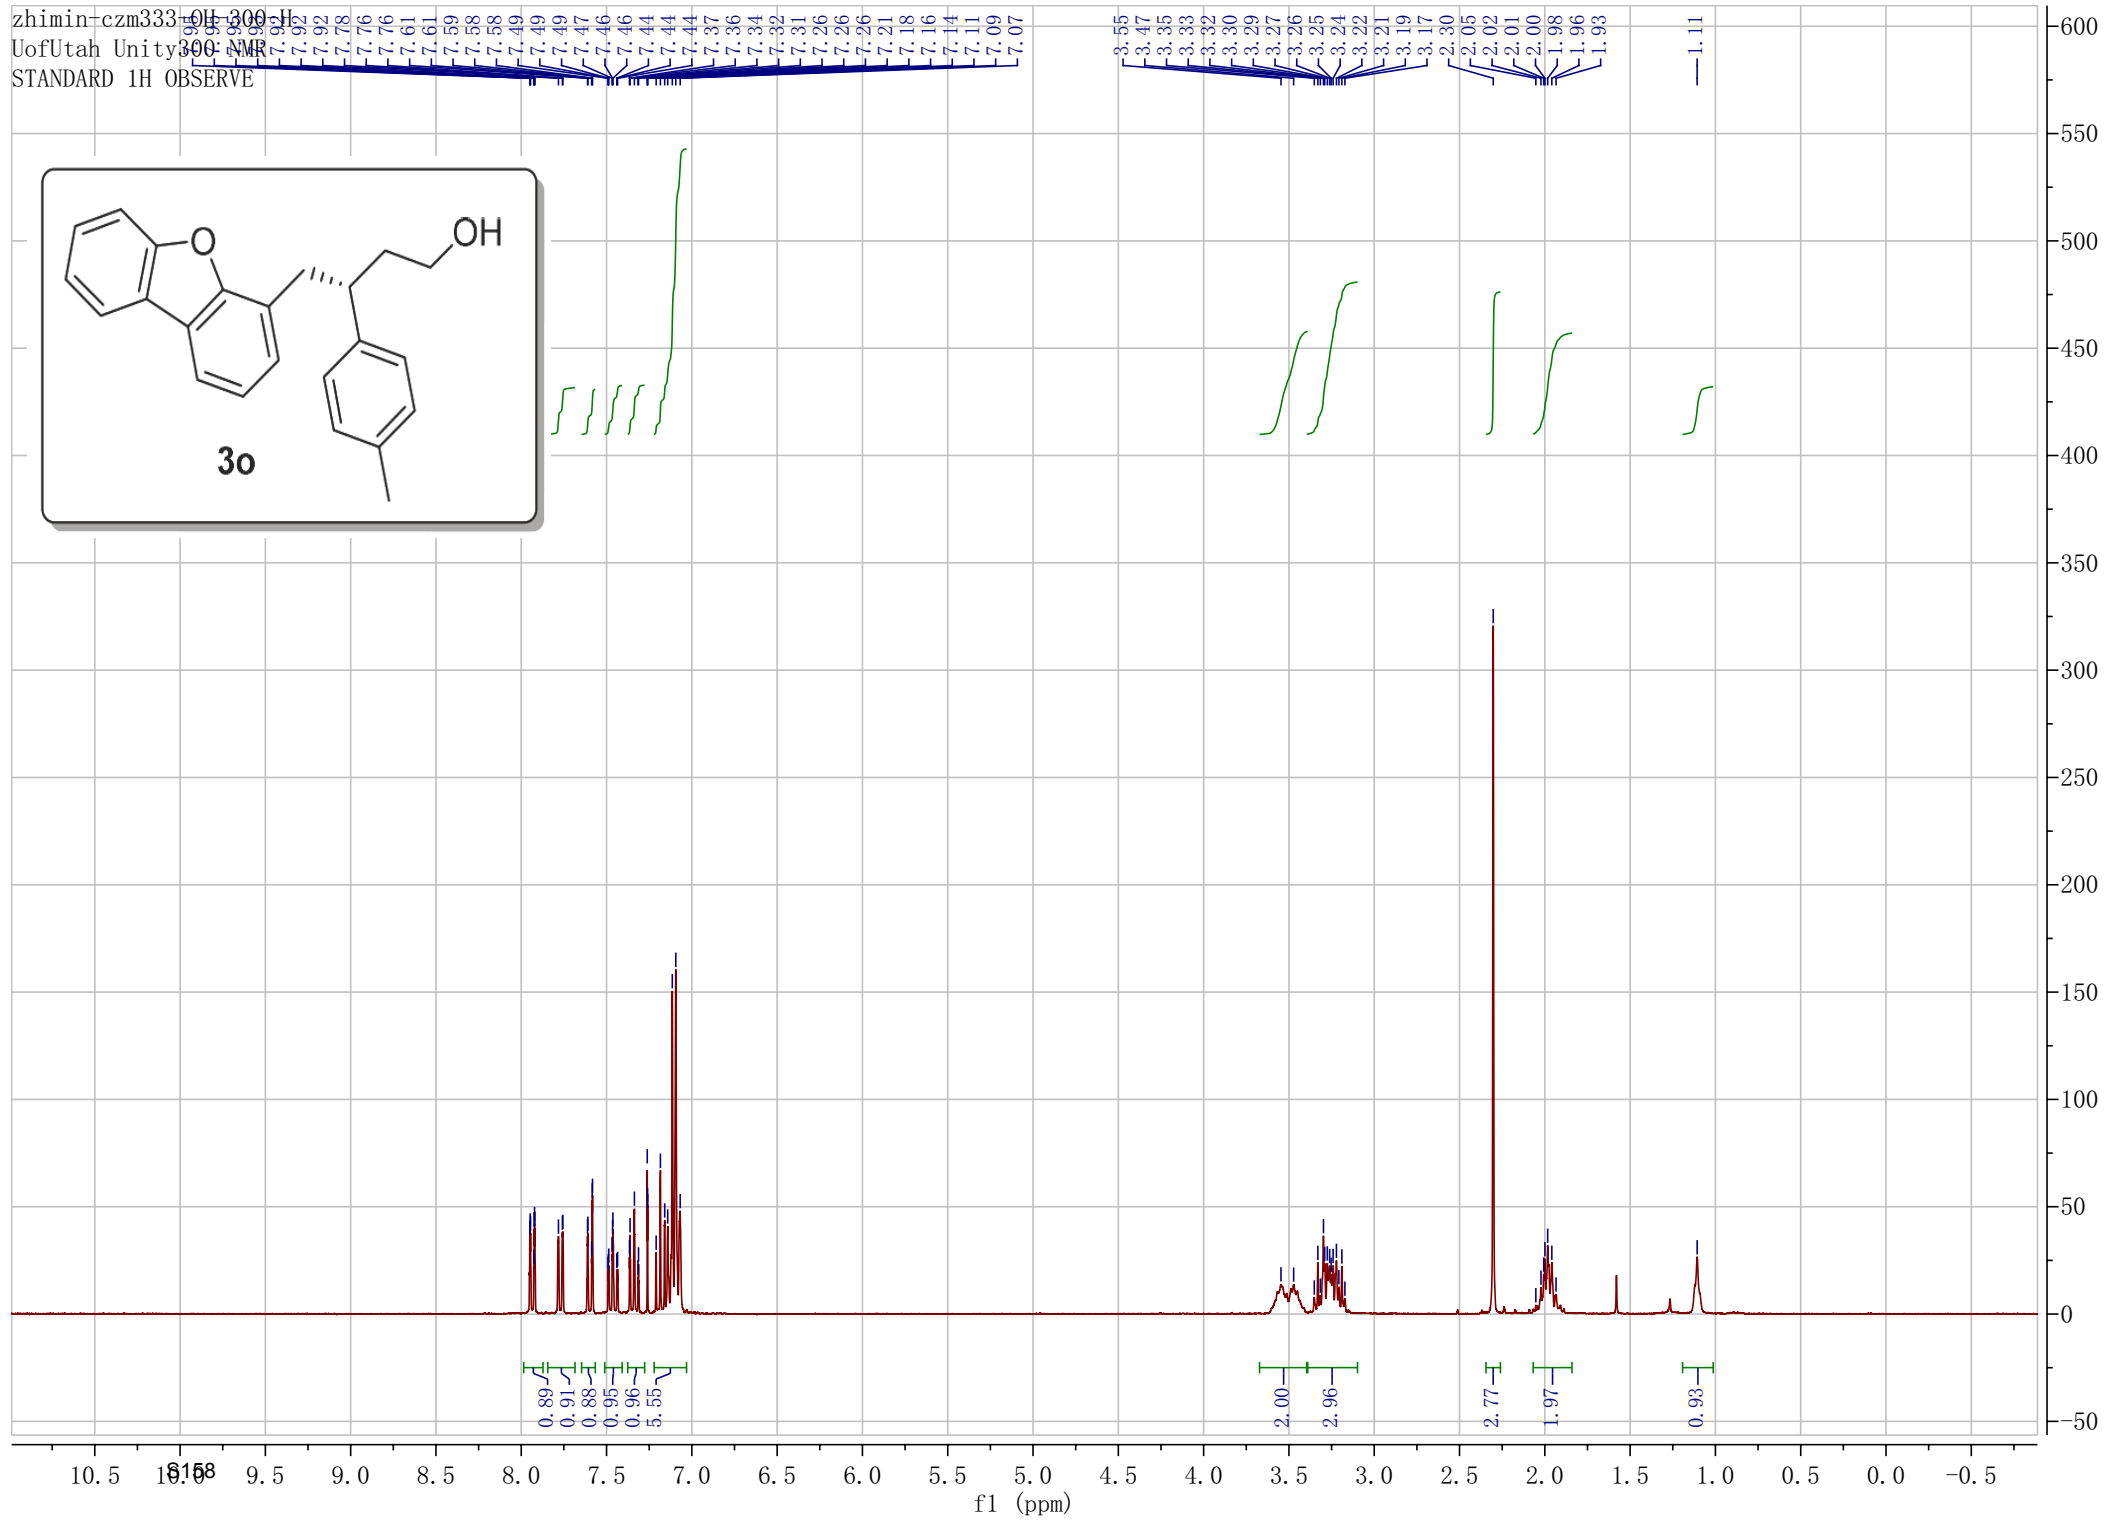

zhimin-czm333-OH-300-C  
13C OBSERVE

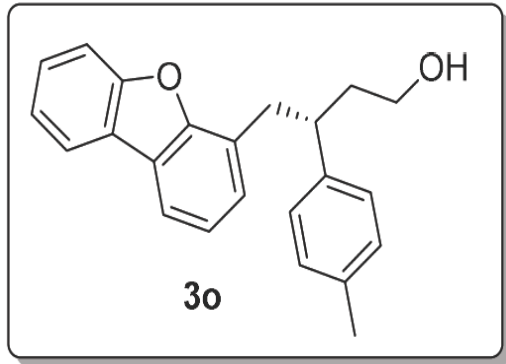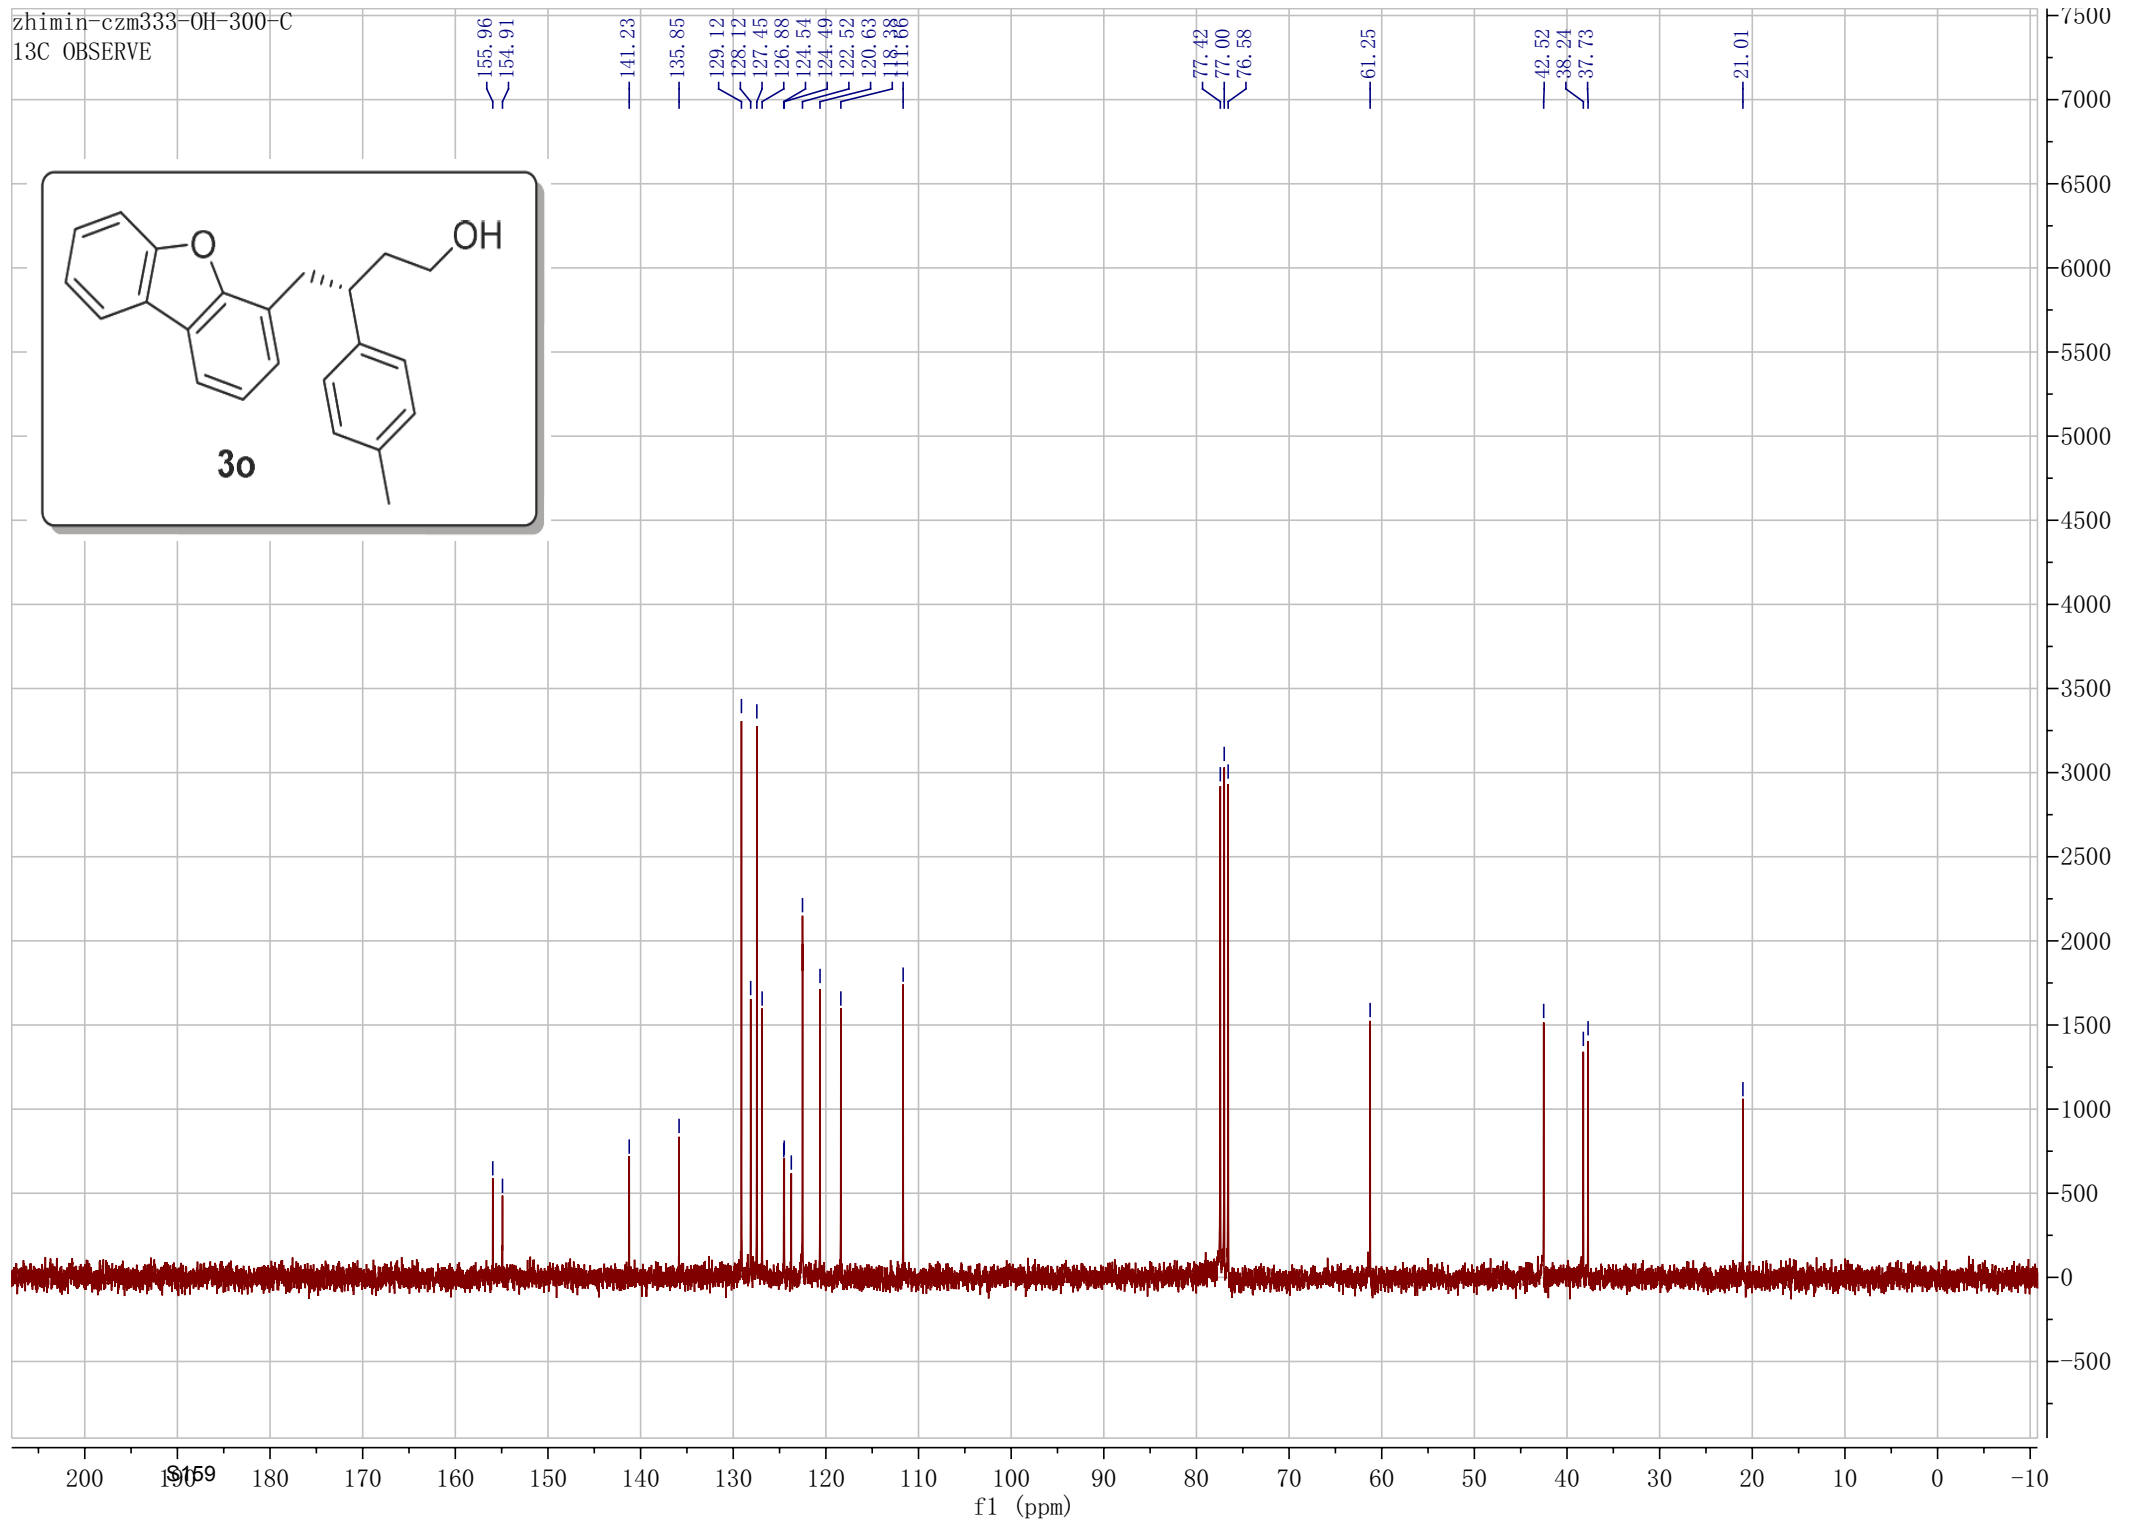

zhimin-1aCHO-300-H  
UofUtah Unity300-NMR  
STANDARD 1H OBSERVED

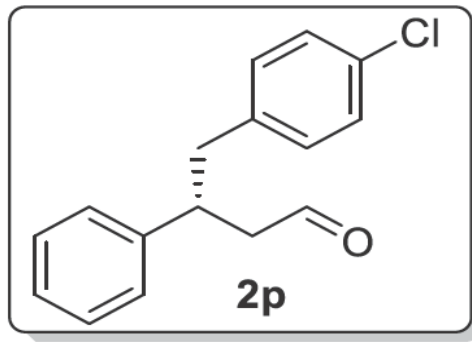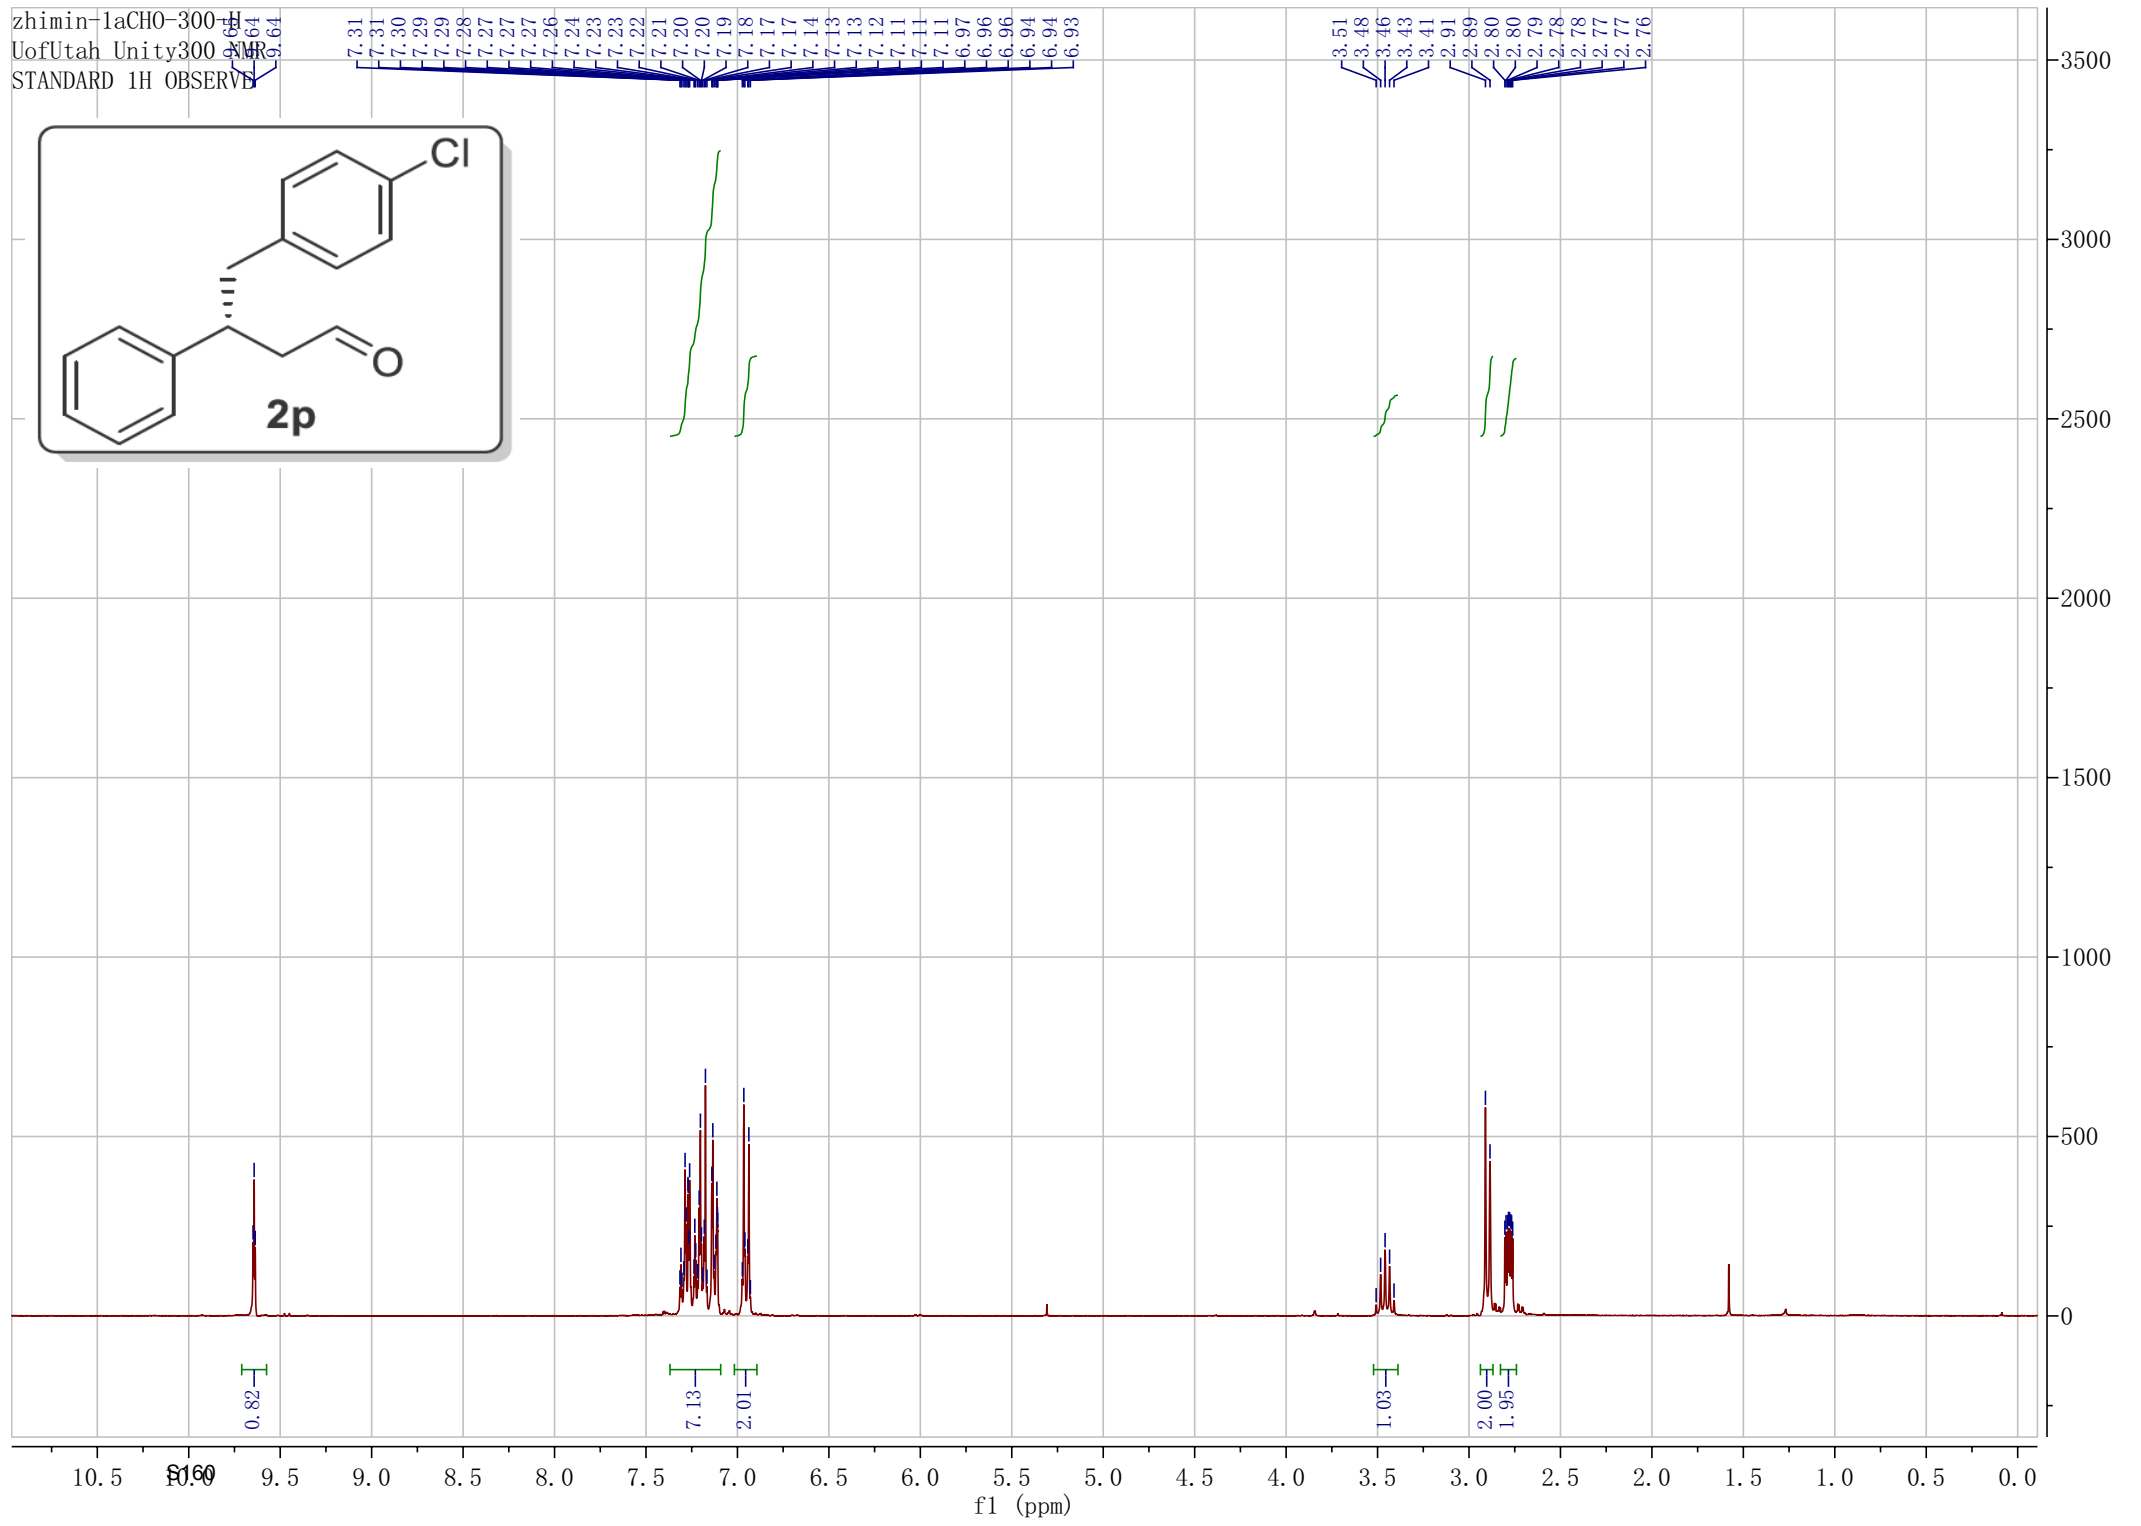

zhimin-1aCHO-300-C  
13C-OBSERVE

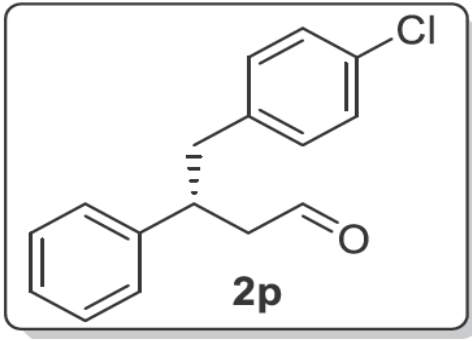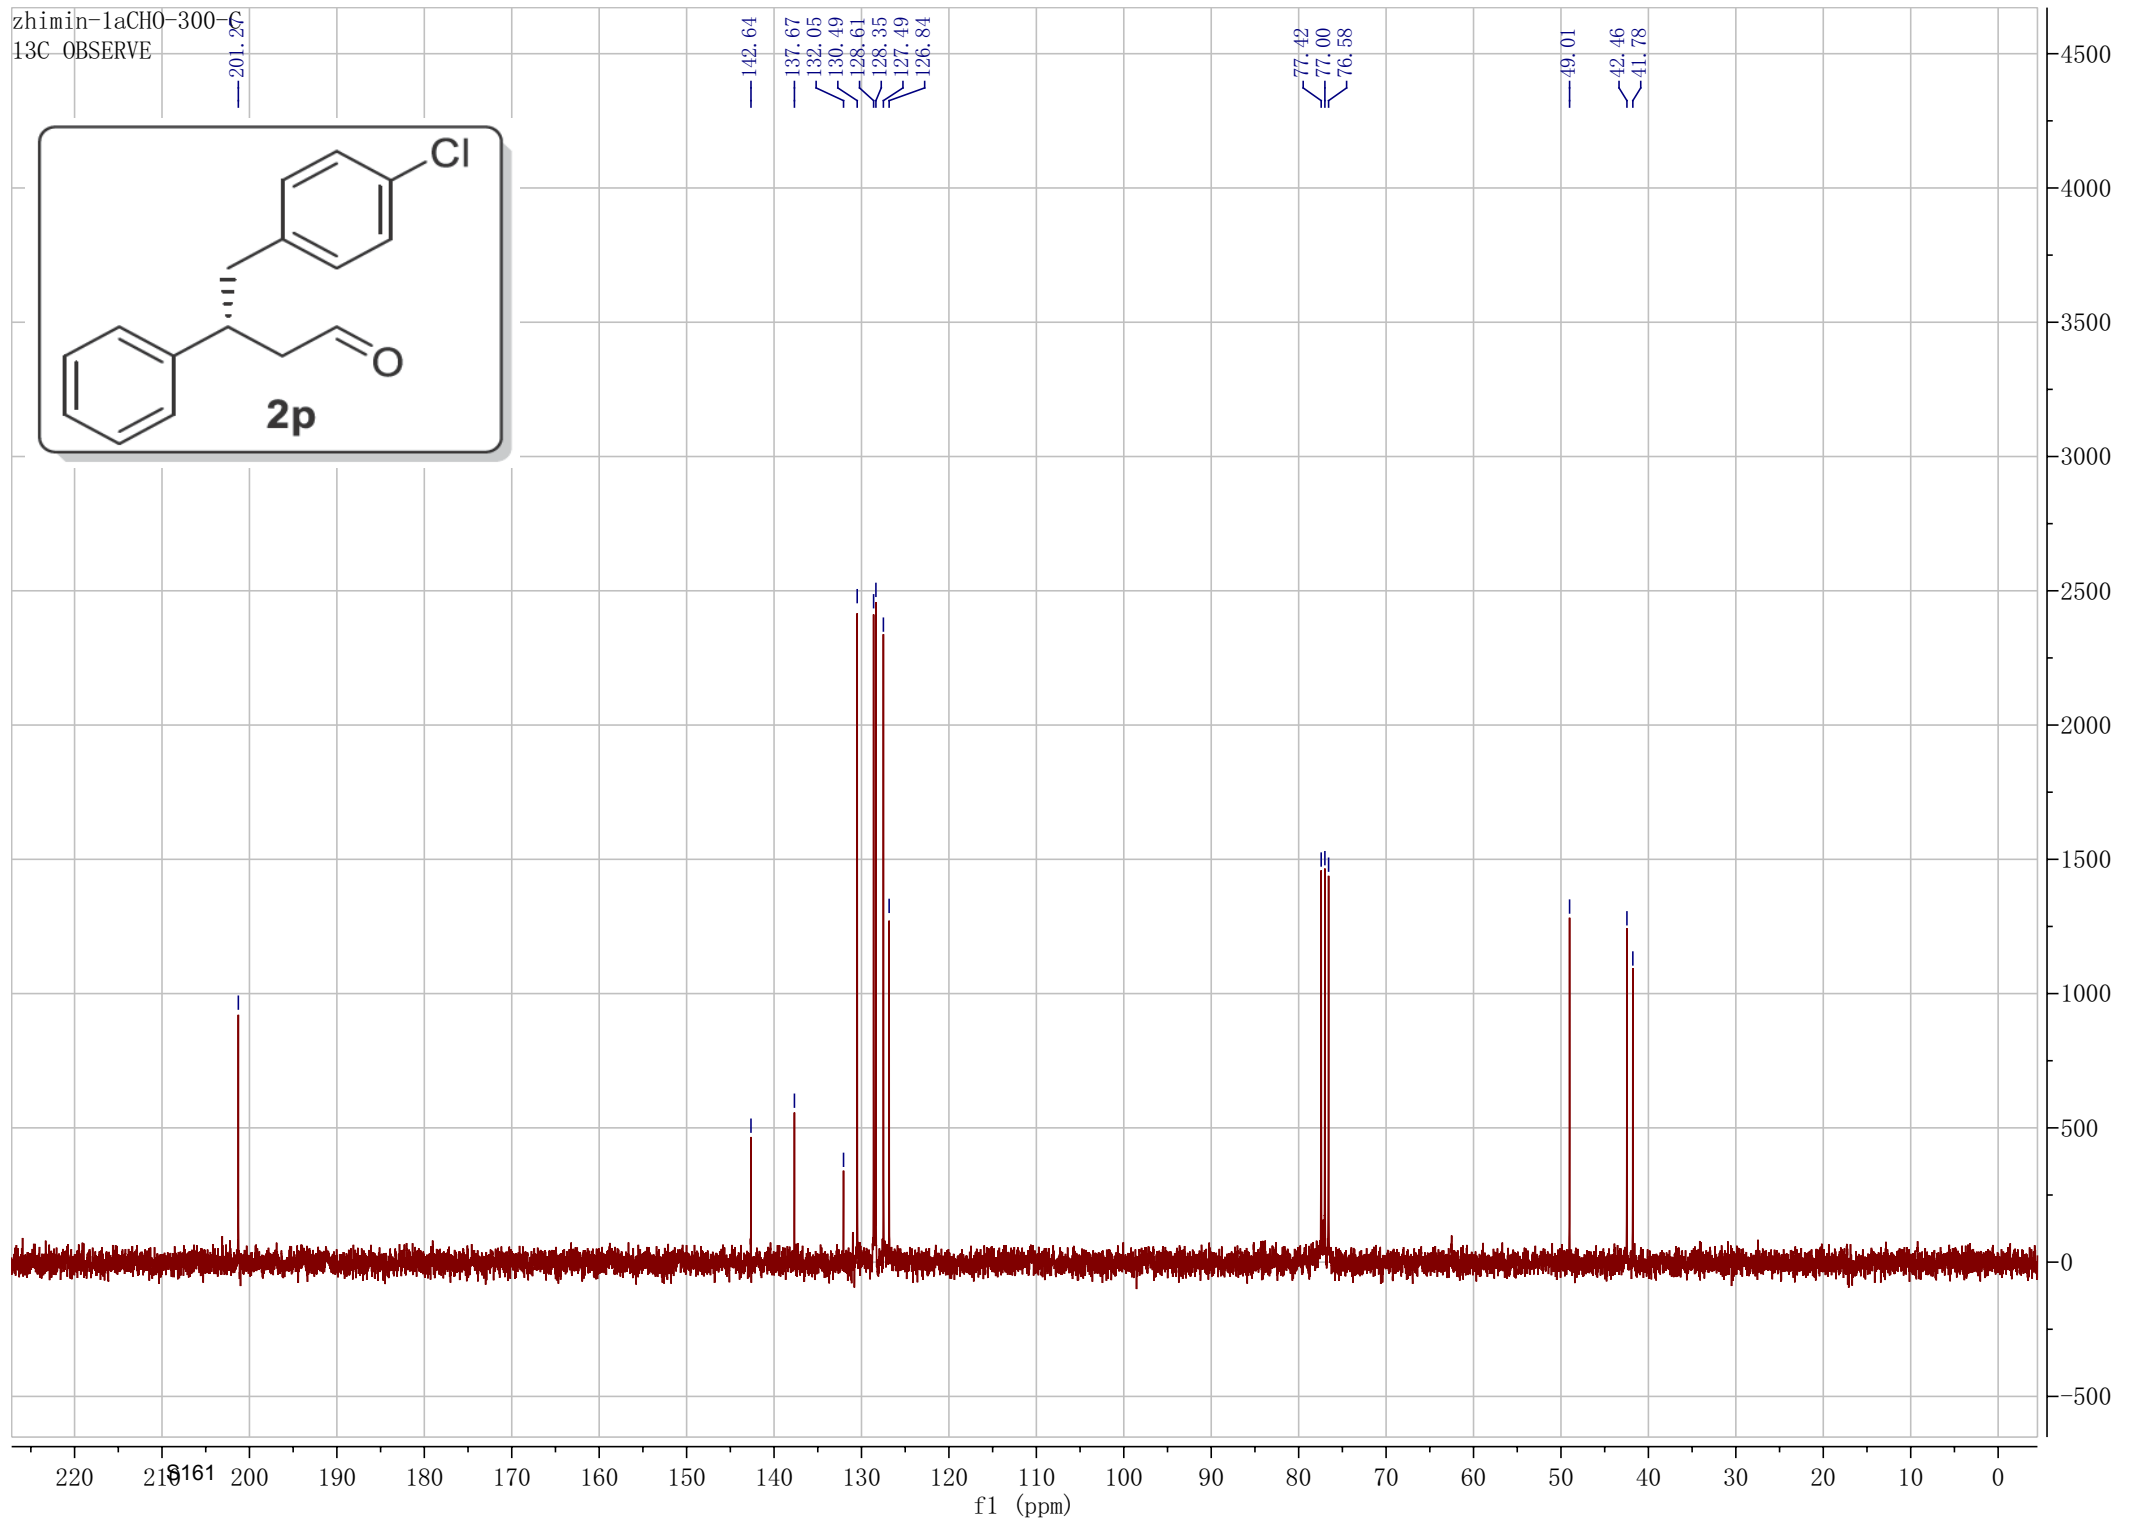

zhimin-1aOH-300-H  
UofUtah Unity300 NMR  
STANDARD 1H OBSERVE

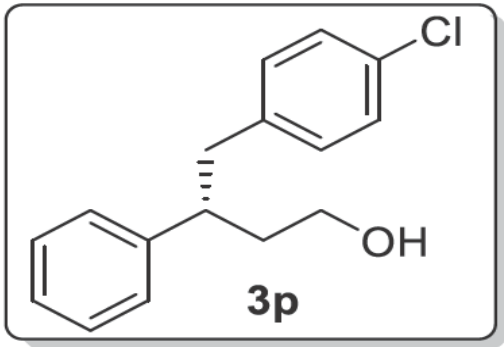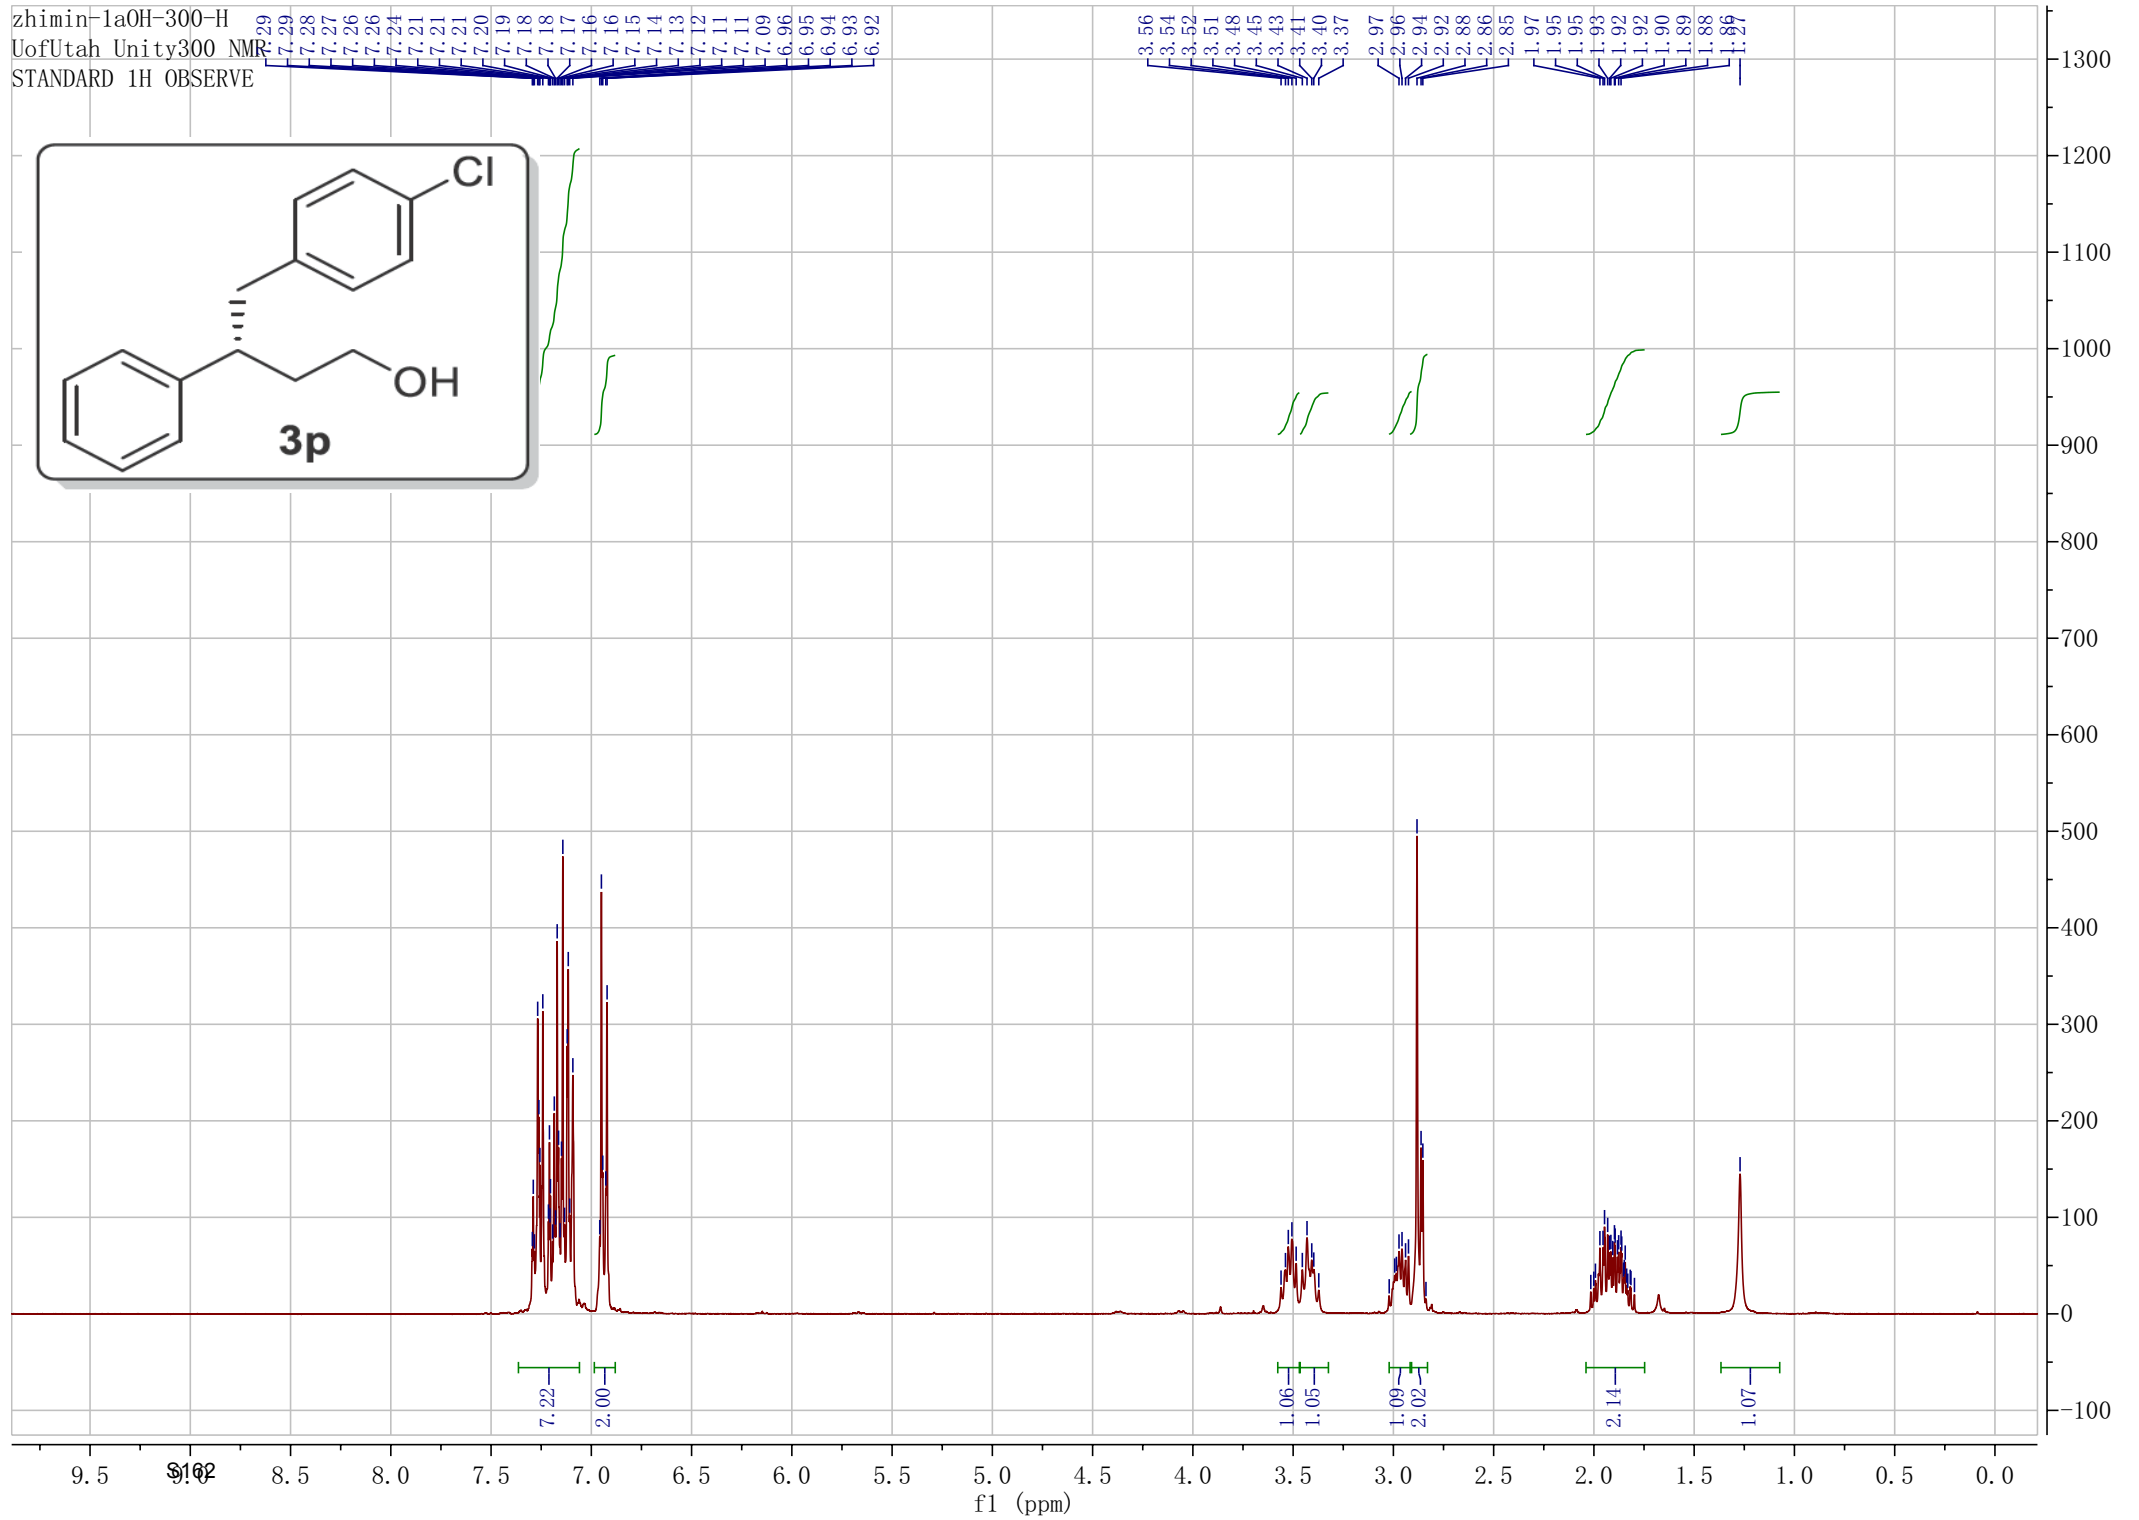



zhimin-1aOH-300-C  
13C\_OBSERVE

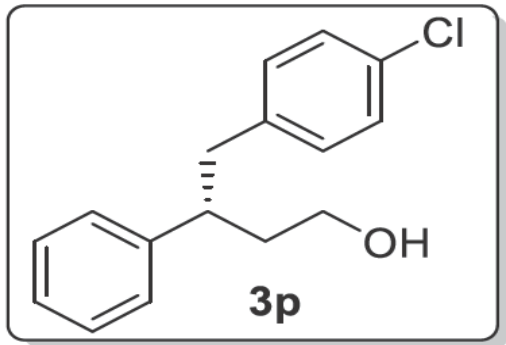

143.66  
138.65  
131.57  
130.41  
128.43  
128.13  
127.63  
126.43

77.42  
77.00  
76.58

60.84

44.32  
43.04

38.16

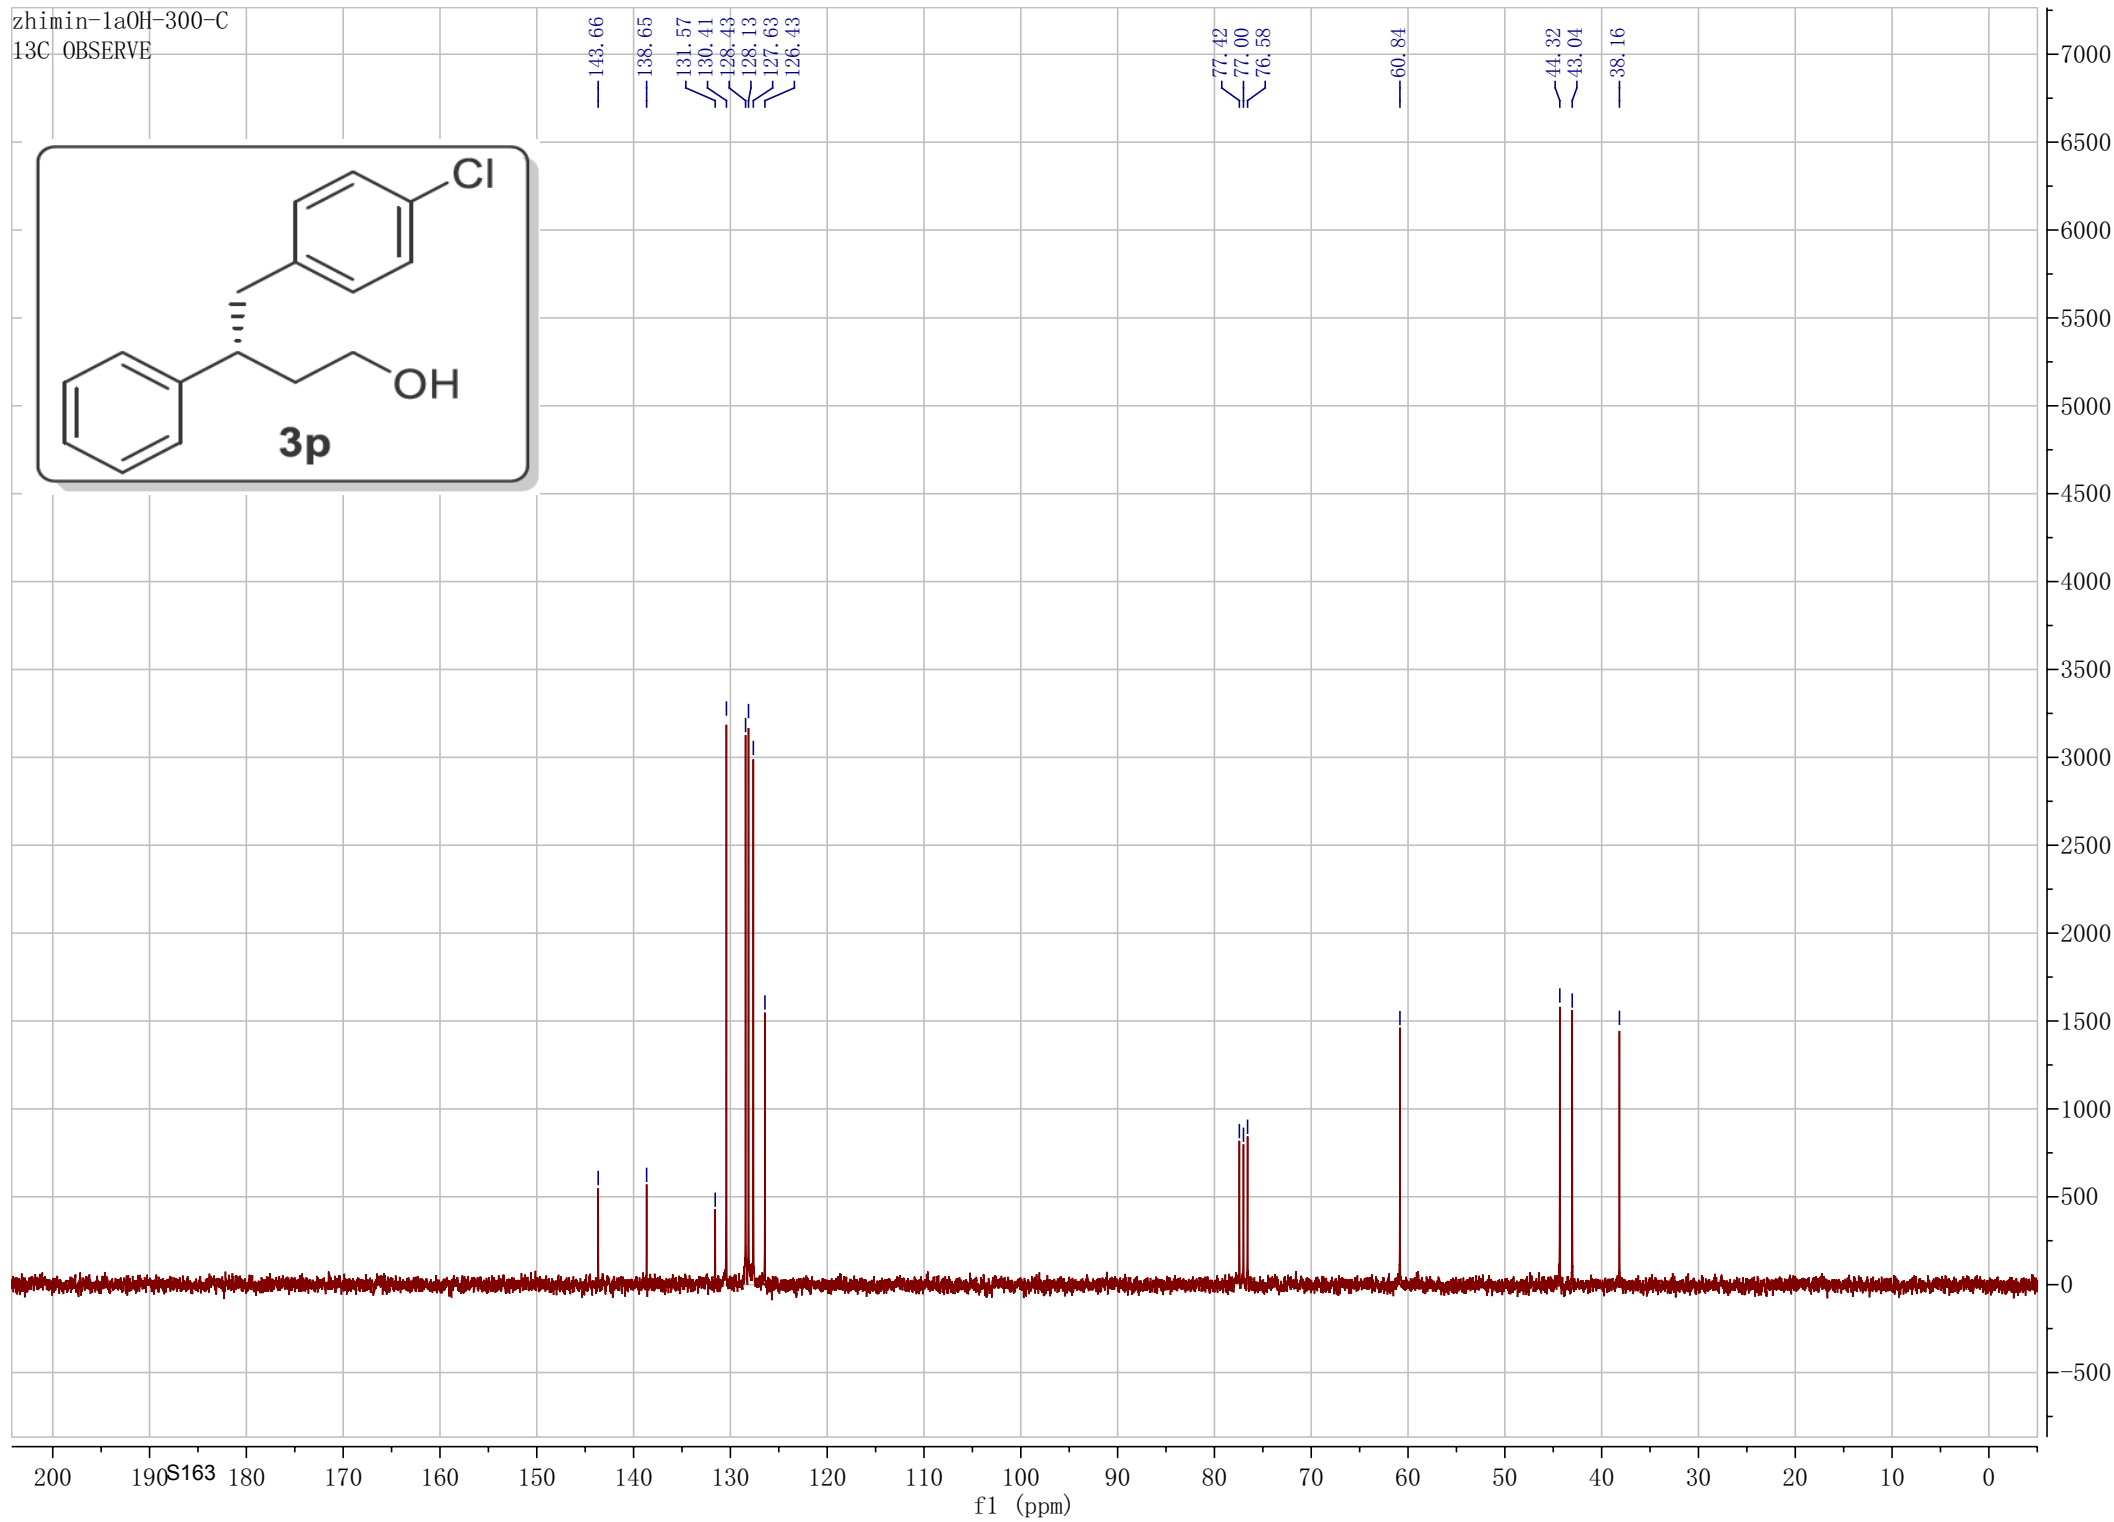

zhimin-czm331-CH-O-H  
STANDARD PROTON PARAMETERS

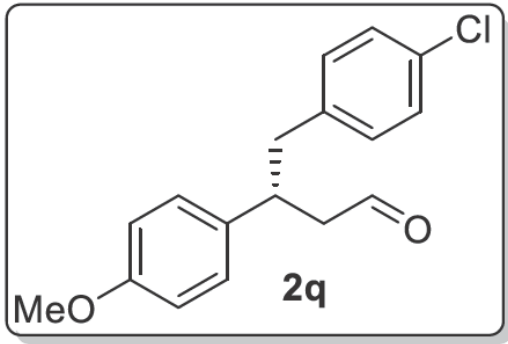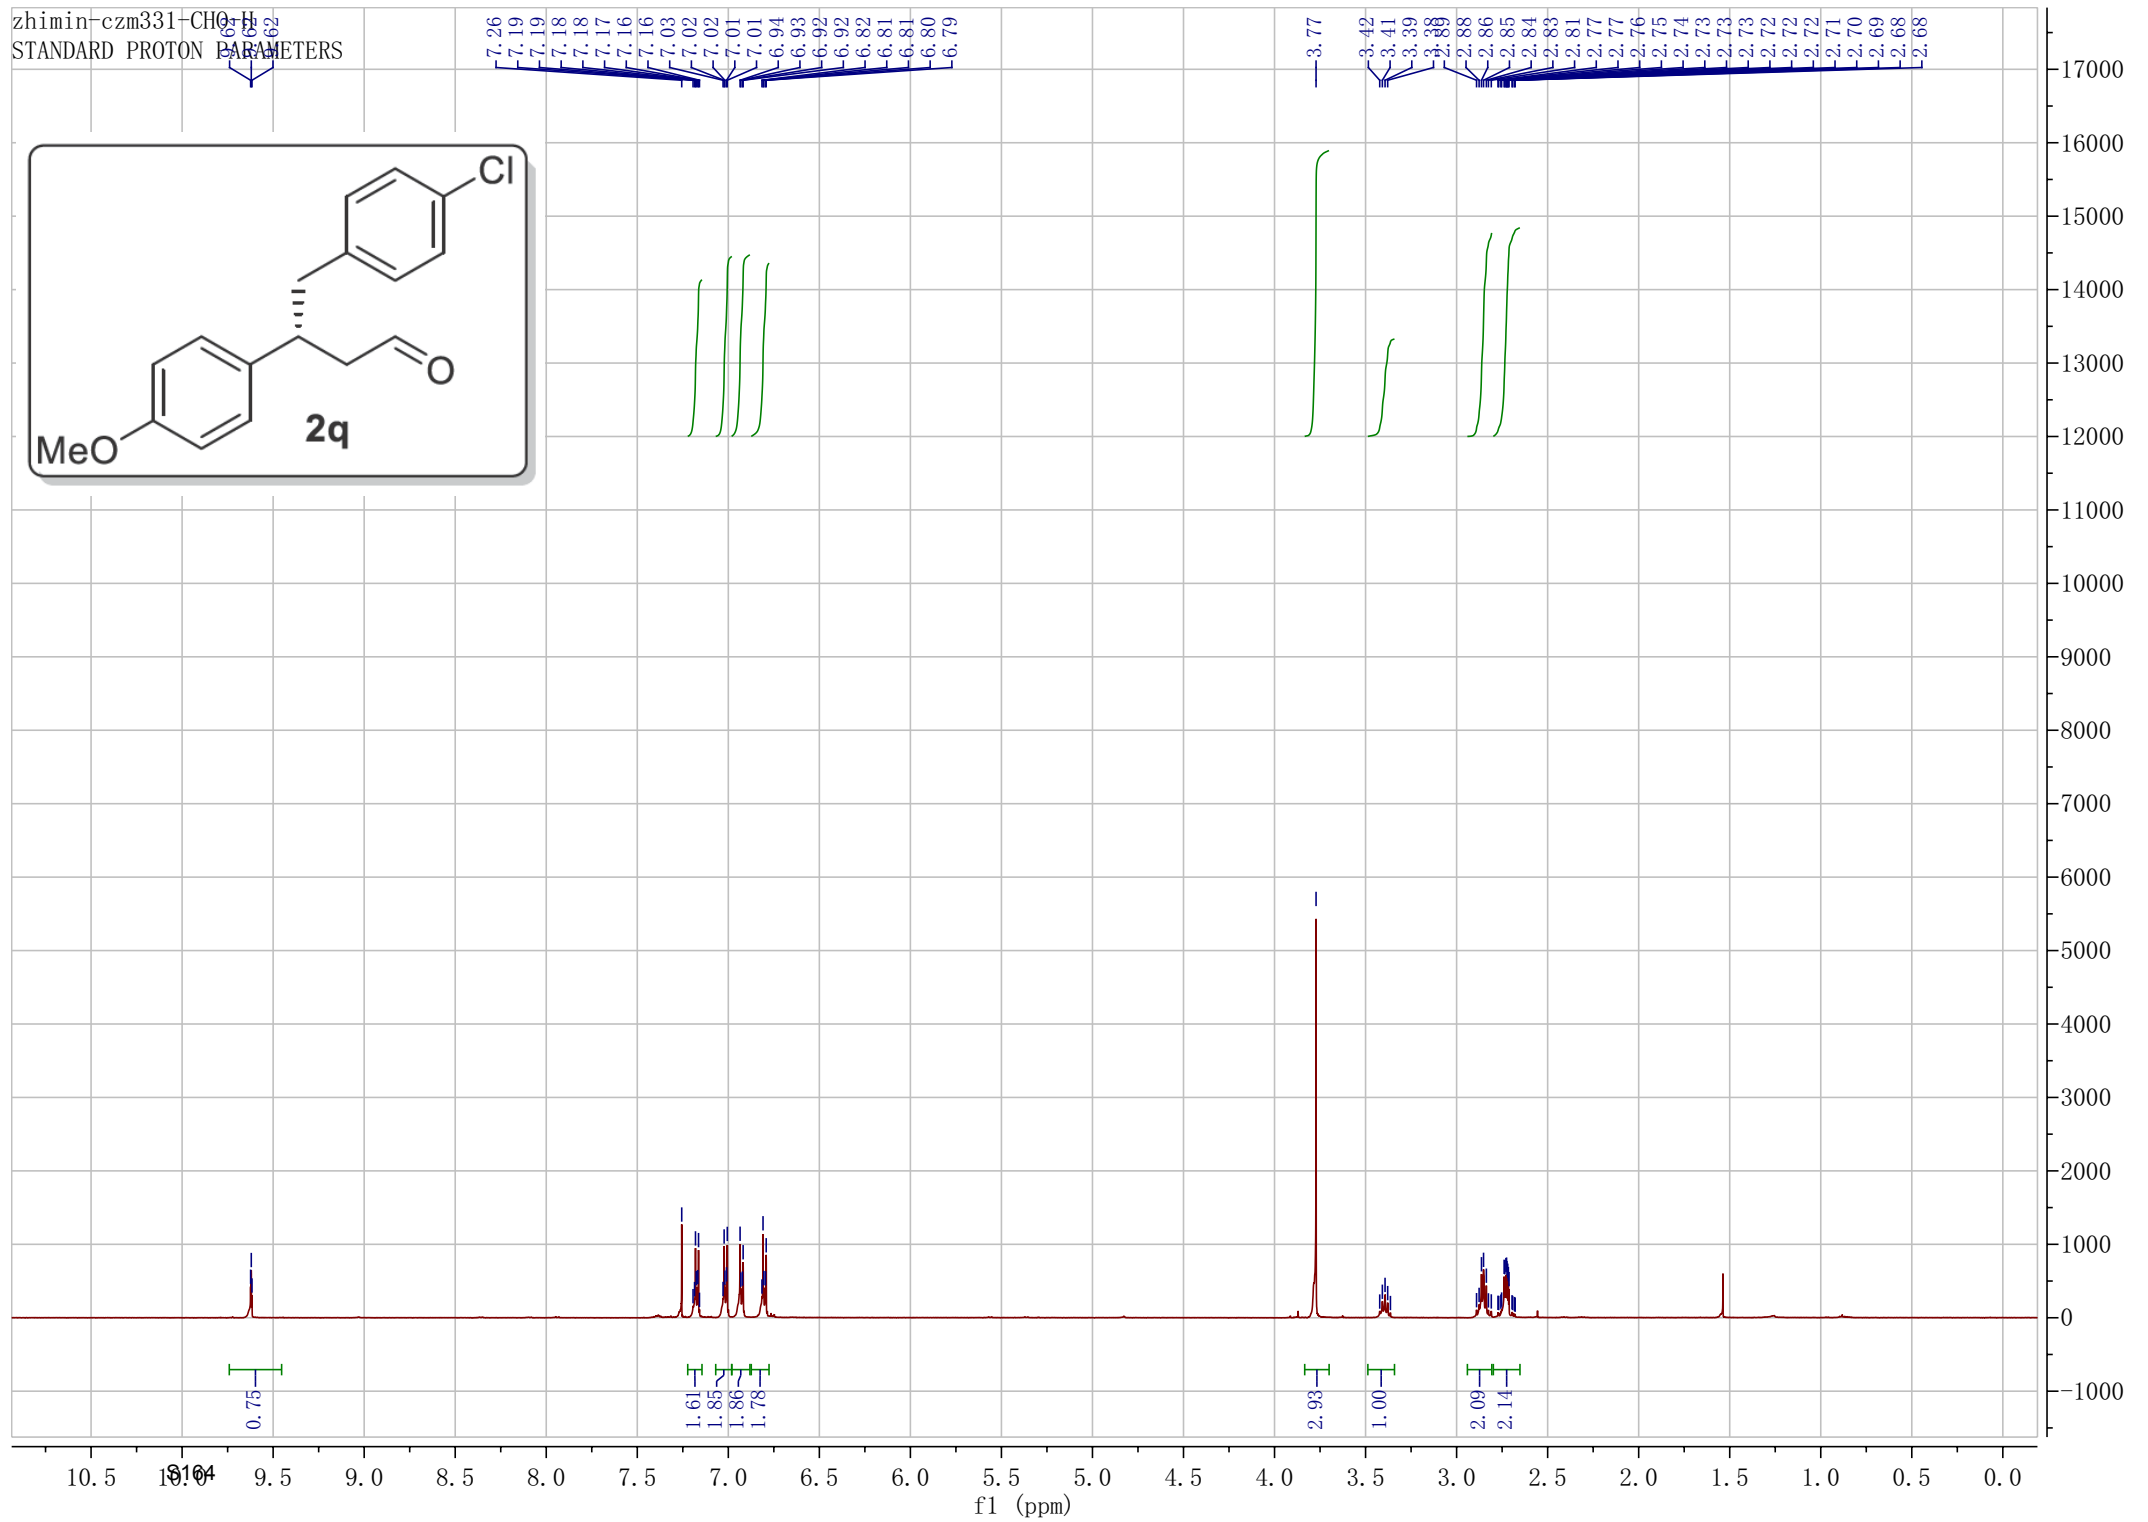

zhimin-2m278-CHO-C  
STANDARD CARBON PARAMETERS

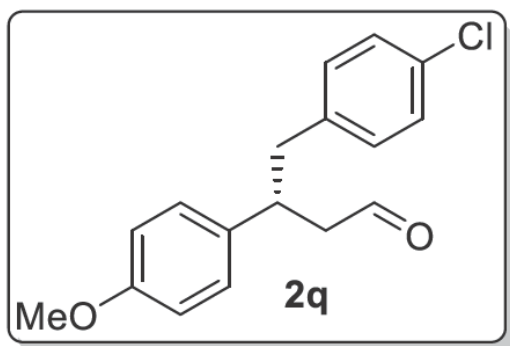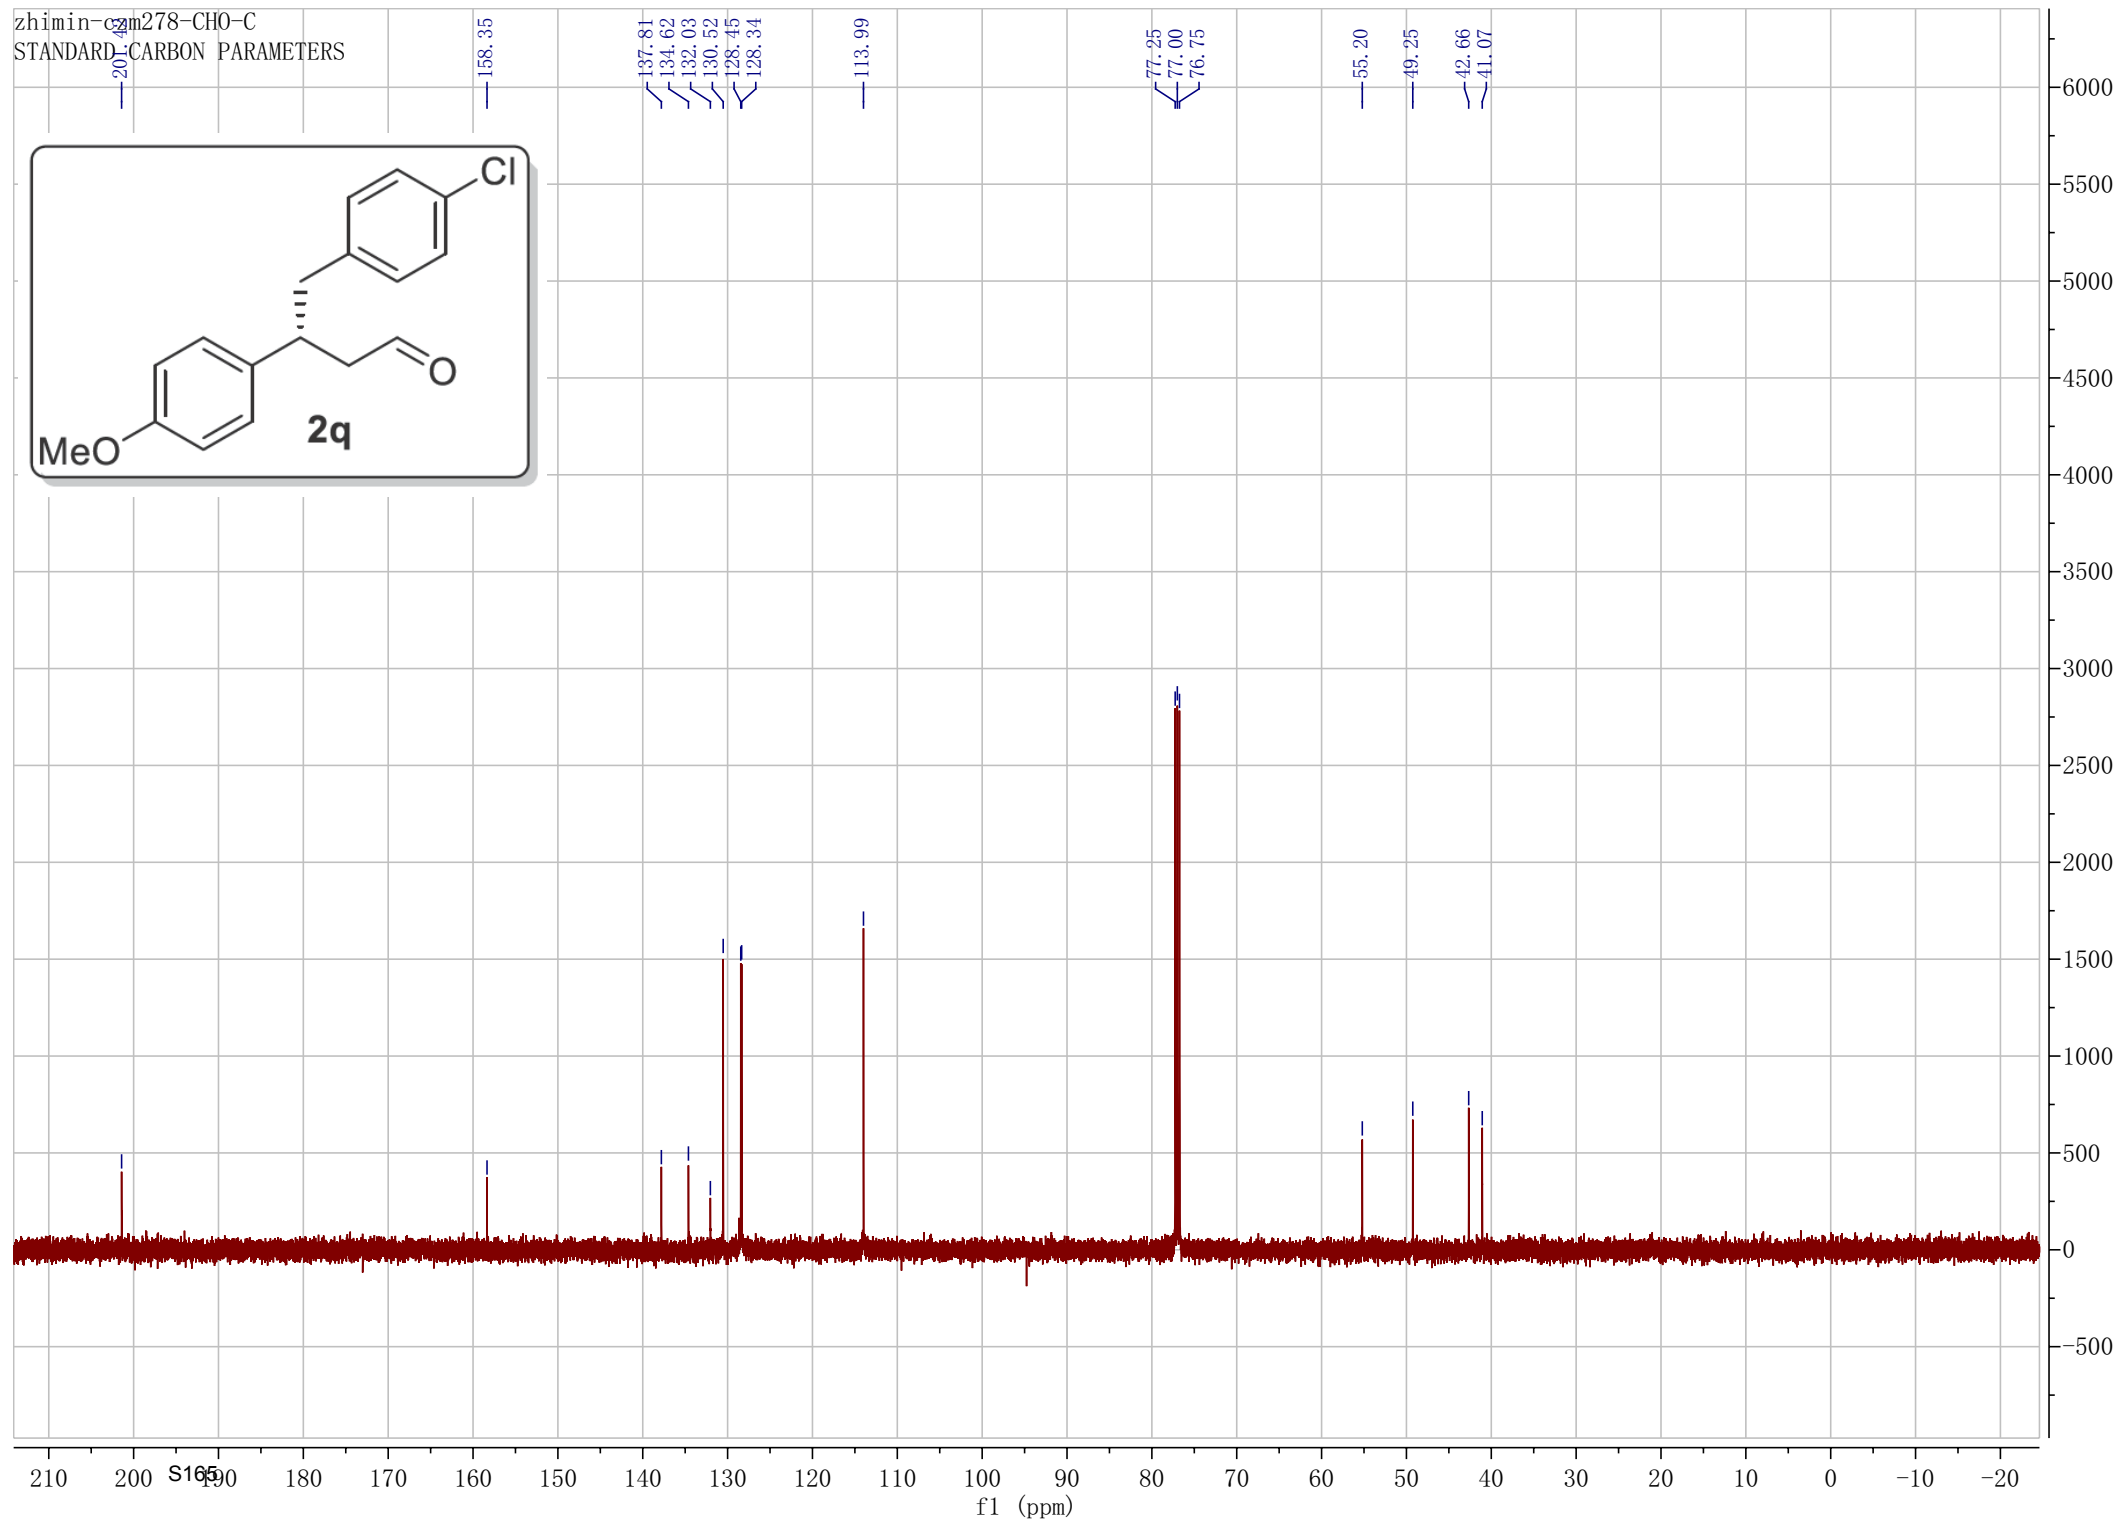

zhimin-czm247-OH-500-H  
STANDARD PROTON PARAMETERS

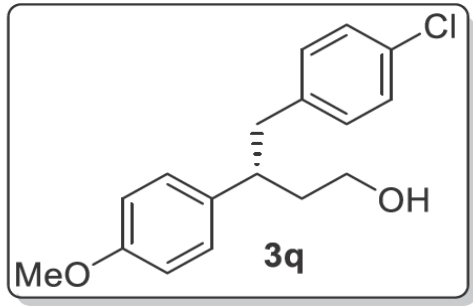

7.26  
7.16  
7.15  
7.14  
7.02  
7.01  
7.00  
6.93  
6.91  
6.82  
6.81  
6.81  
6.80  
6.79

3.78  
3.55  
3.54  
3.53  
3.52  
3.51  
3.47  
3.45  
3.44  
3.43  
3.42  
3.41

2.92  
2.92  
2.85  
2.84  
2.83  
2.82

1.95  
1.94  
1.94  
1.93  
1.85  
1.84  
1.83  
1.82  
1.06  
1.05

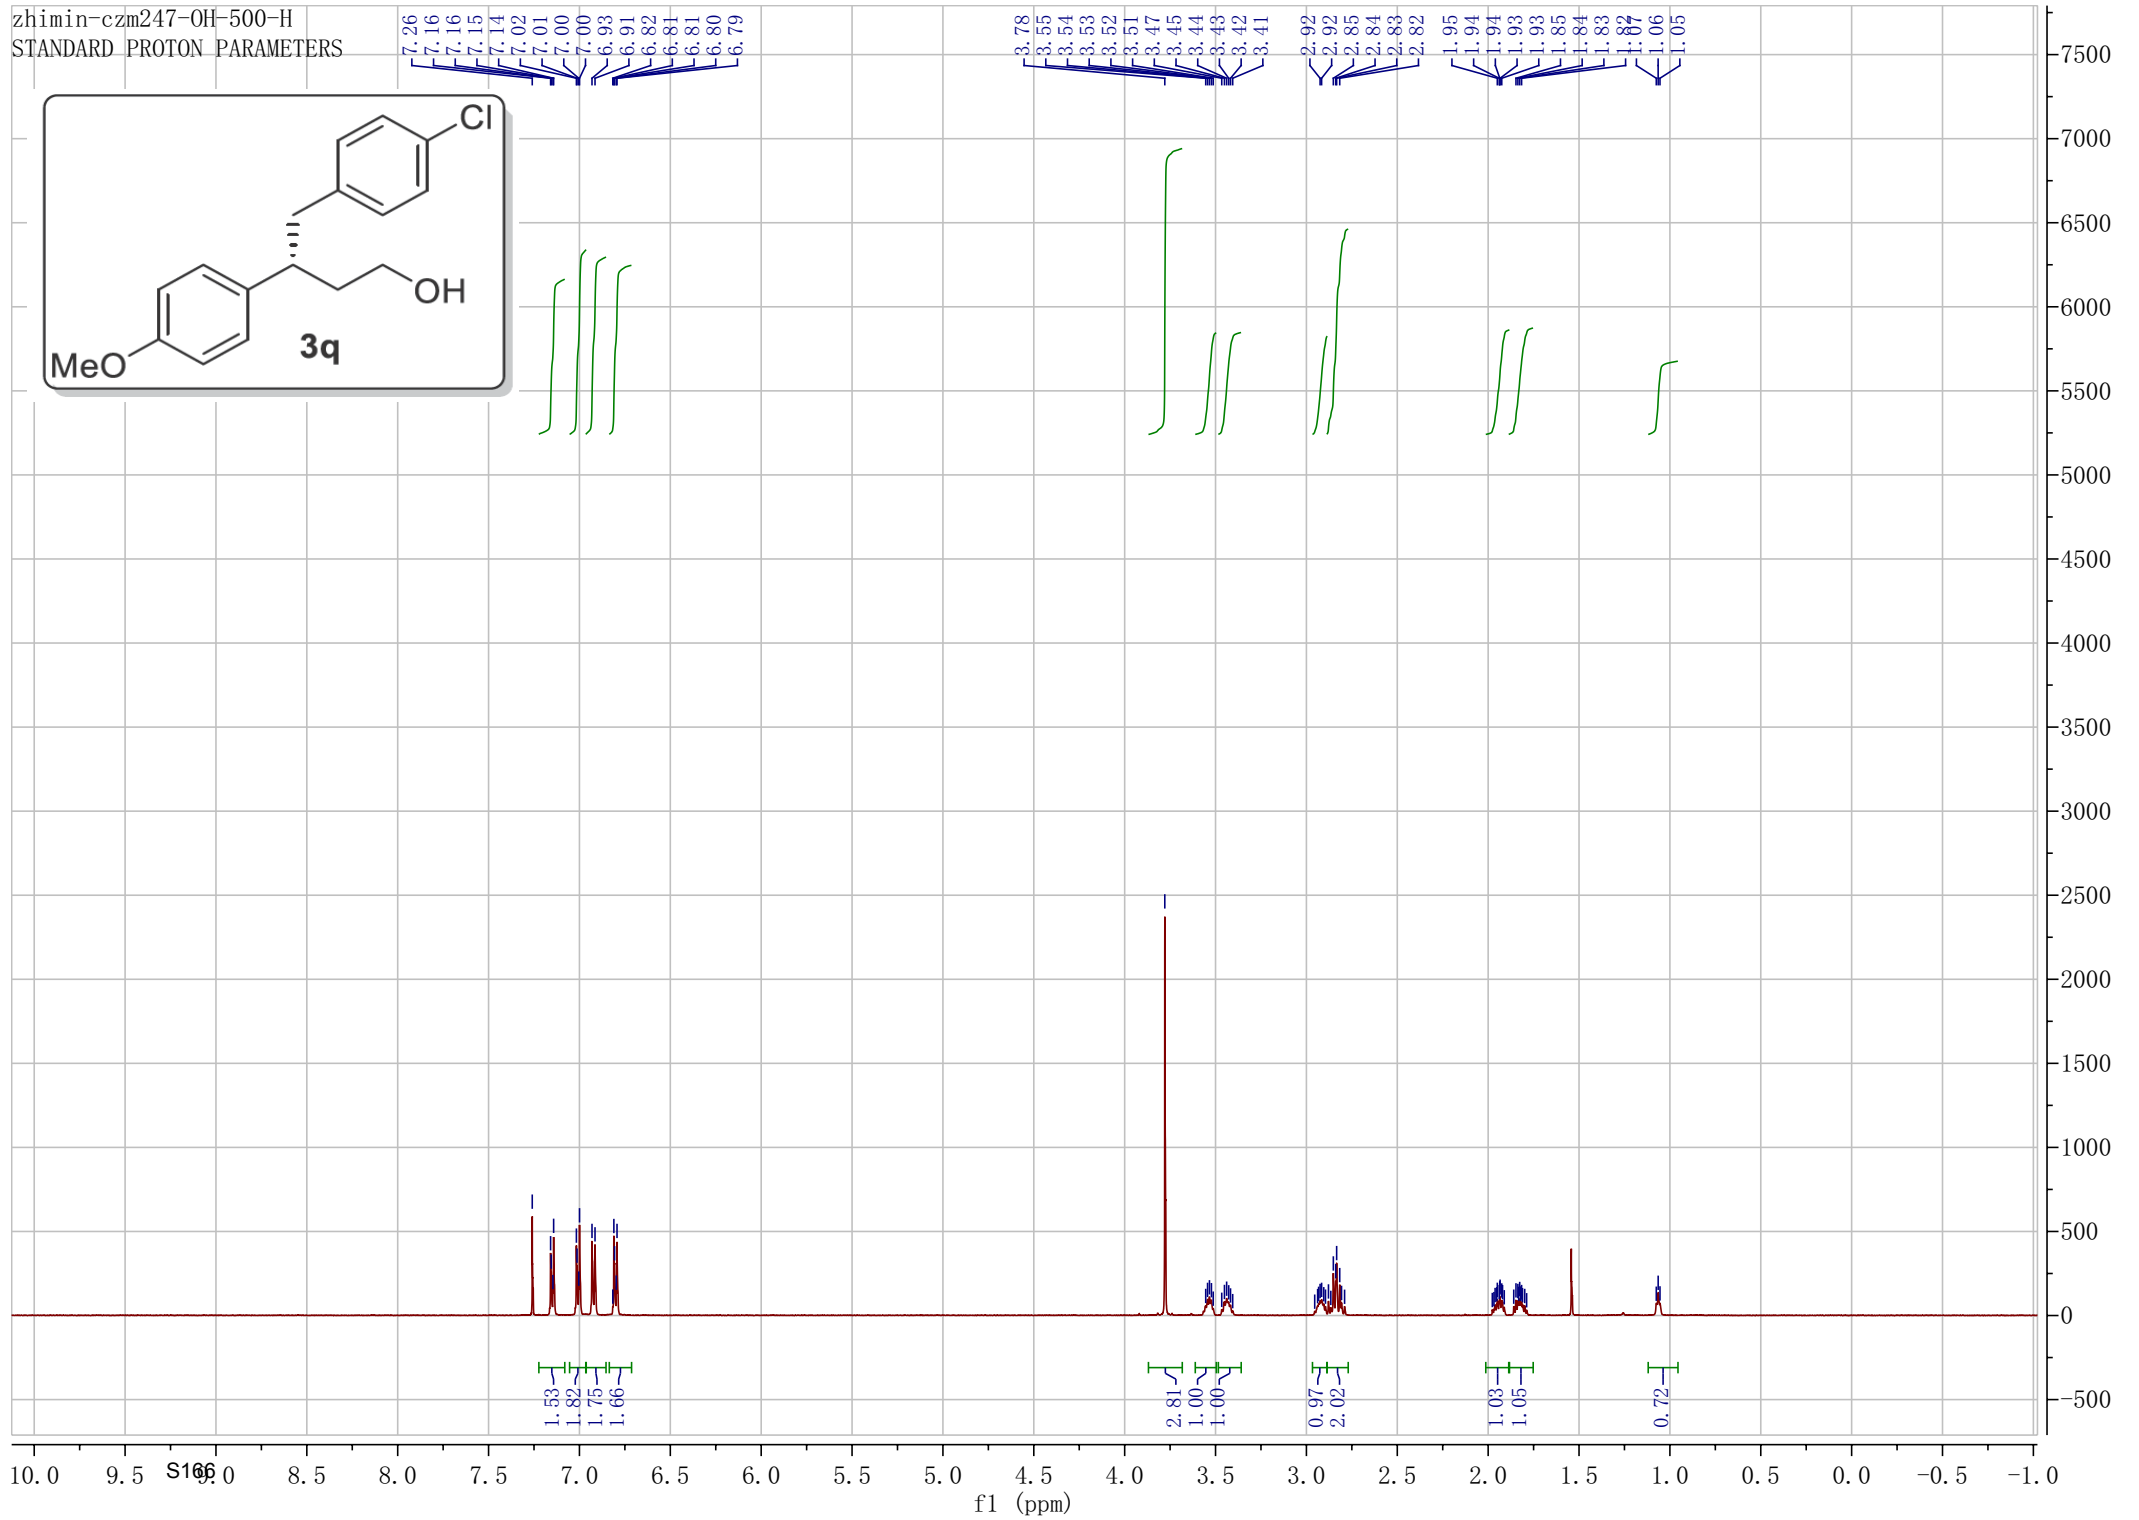

10.0 9.5 9.0 8.5 8.0 7.5 7.0 6.5 6.0 5.5 5.0 4.5 4.0 3.5 3.0 2.5 2.0 1.5 1.0 0.5 0.0 -0.5 -1.0

f1 (ppm)

zhimin-czm247-OH-C  
STANDARD CARBON PARAMETERS

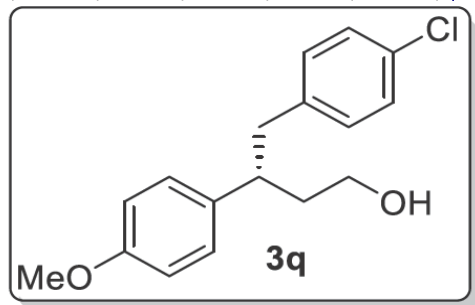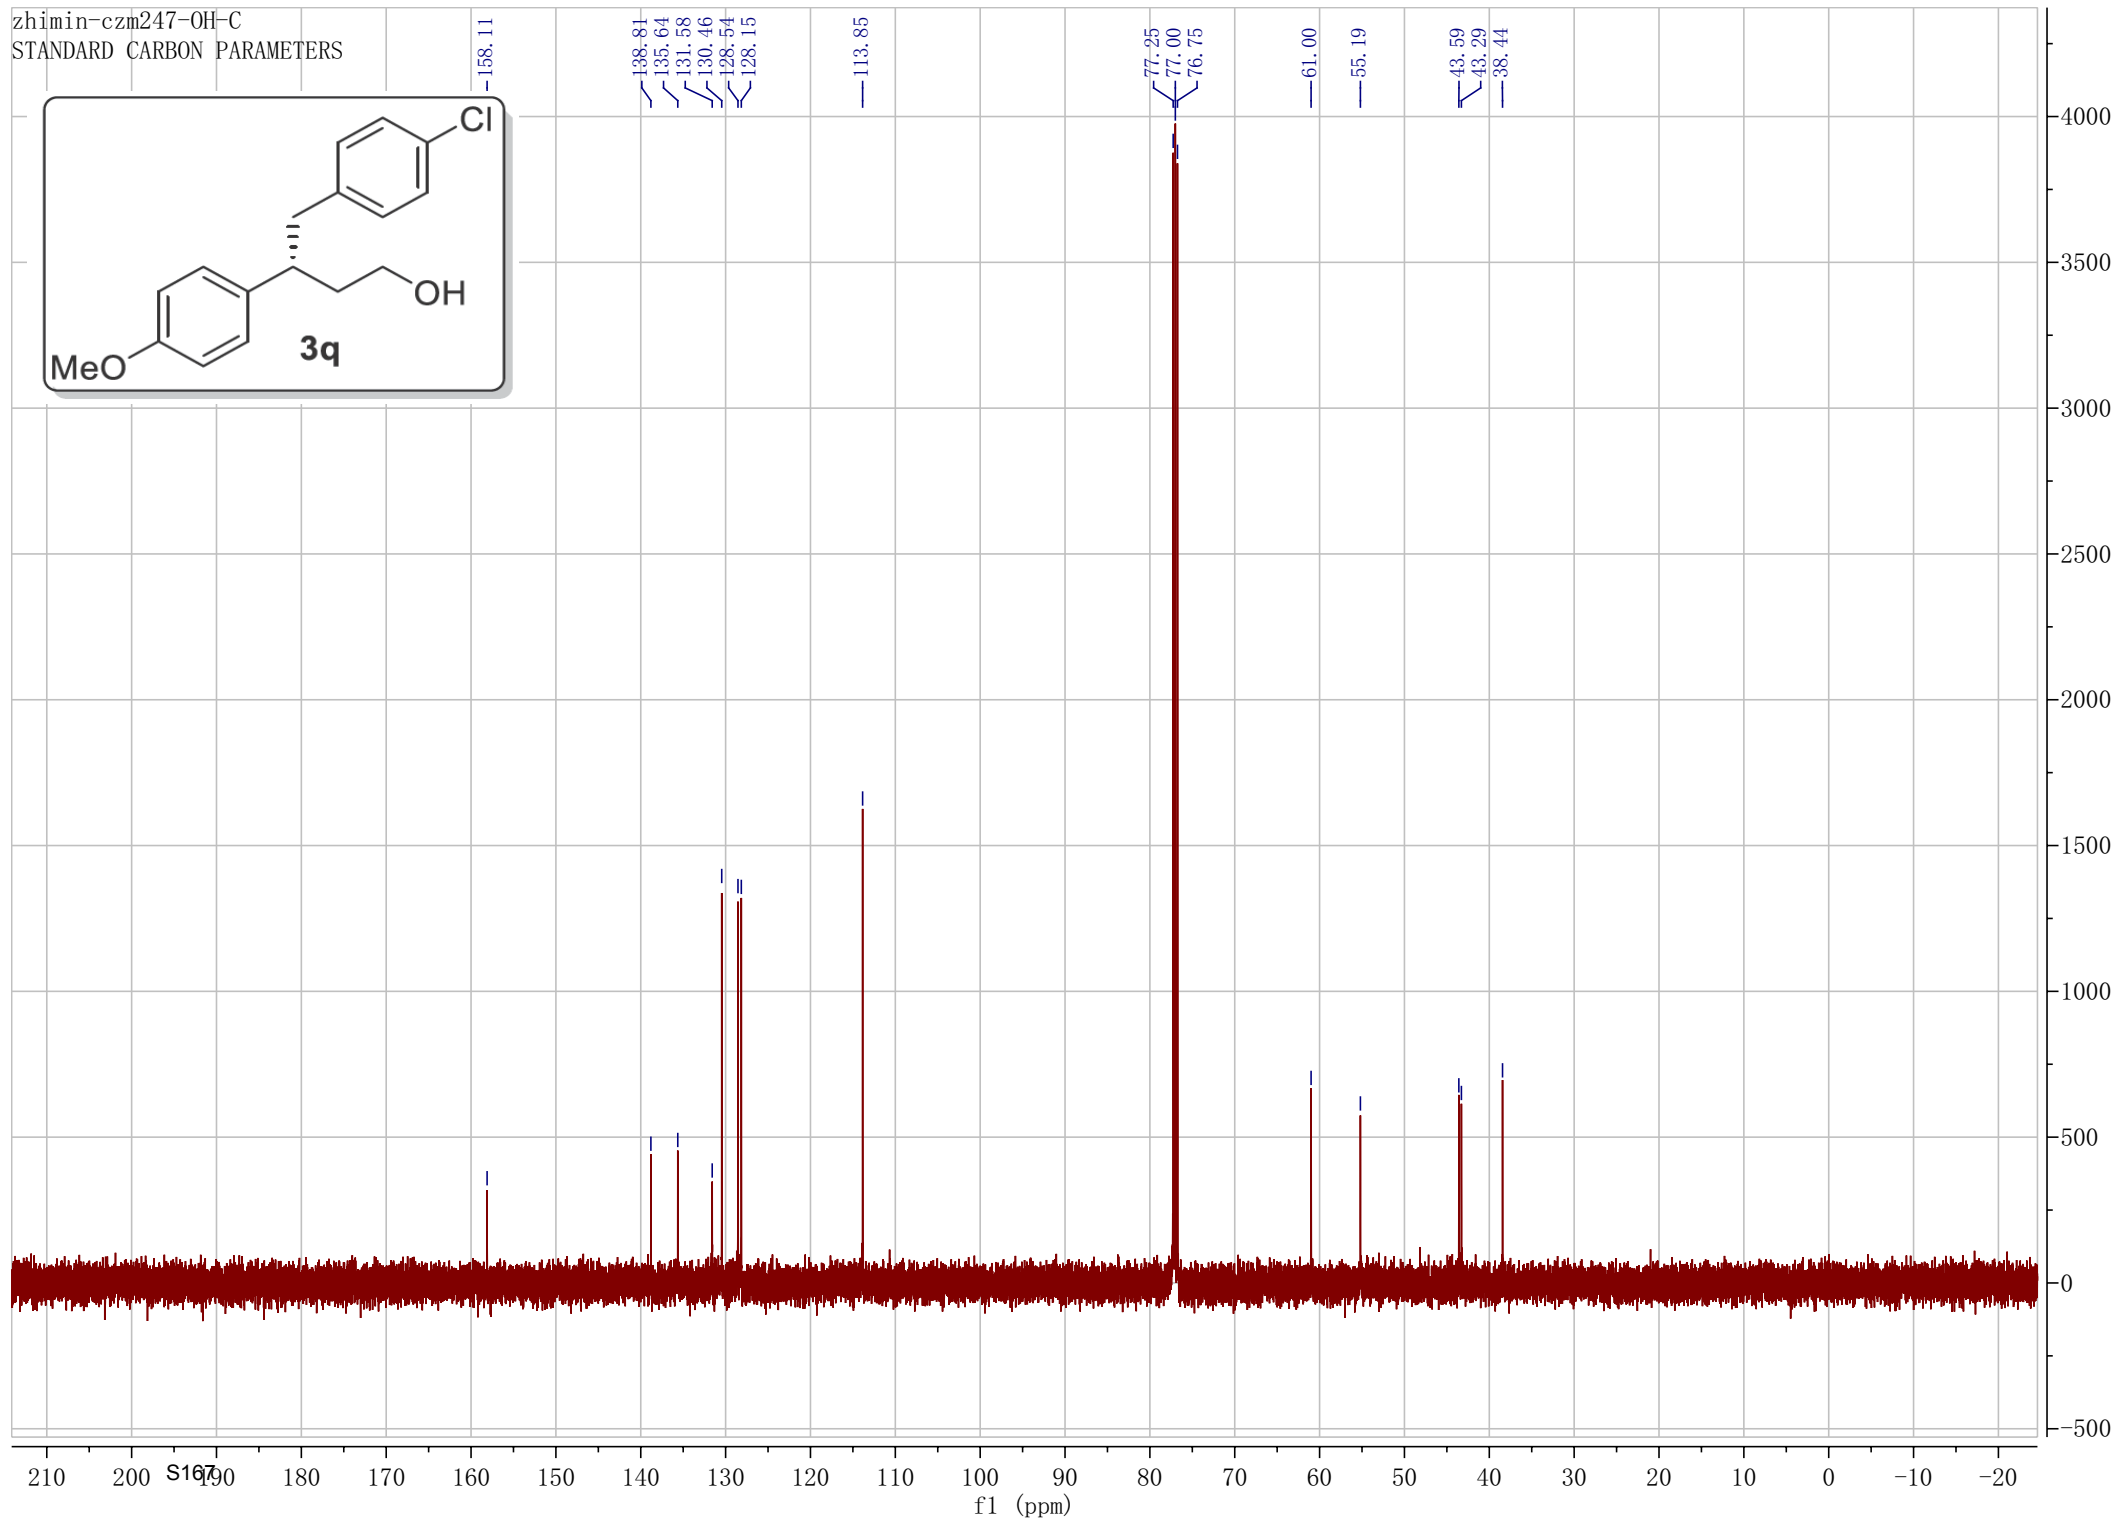

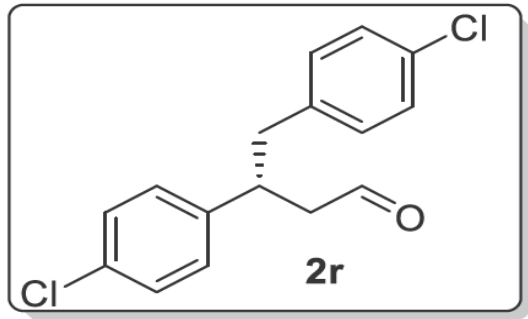

7.26  
7.26  
7.25  
7.24  
7.23  
7.22  
7.21  
7.20  
7.19  
7.18  
7.17  
7.16  
7.05  
7.04  
7.04  
7.02  
7.01  
6.94  
6.93  
6.91  
6.90

3.49  
3.46  
3.44  
3.41  
3.39  
2.93  
2.91  
2.89  
2.86  
2.85  
2.82  
2.80  
2.78  
2.78  
2.77  
2.76  
2.75  
2.74

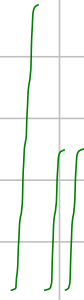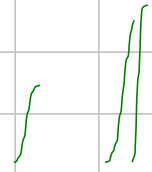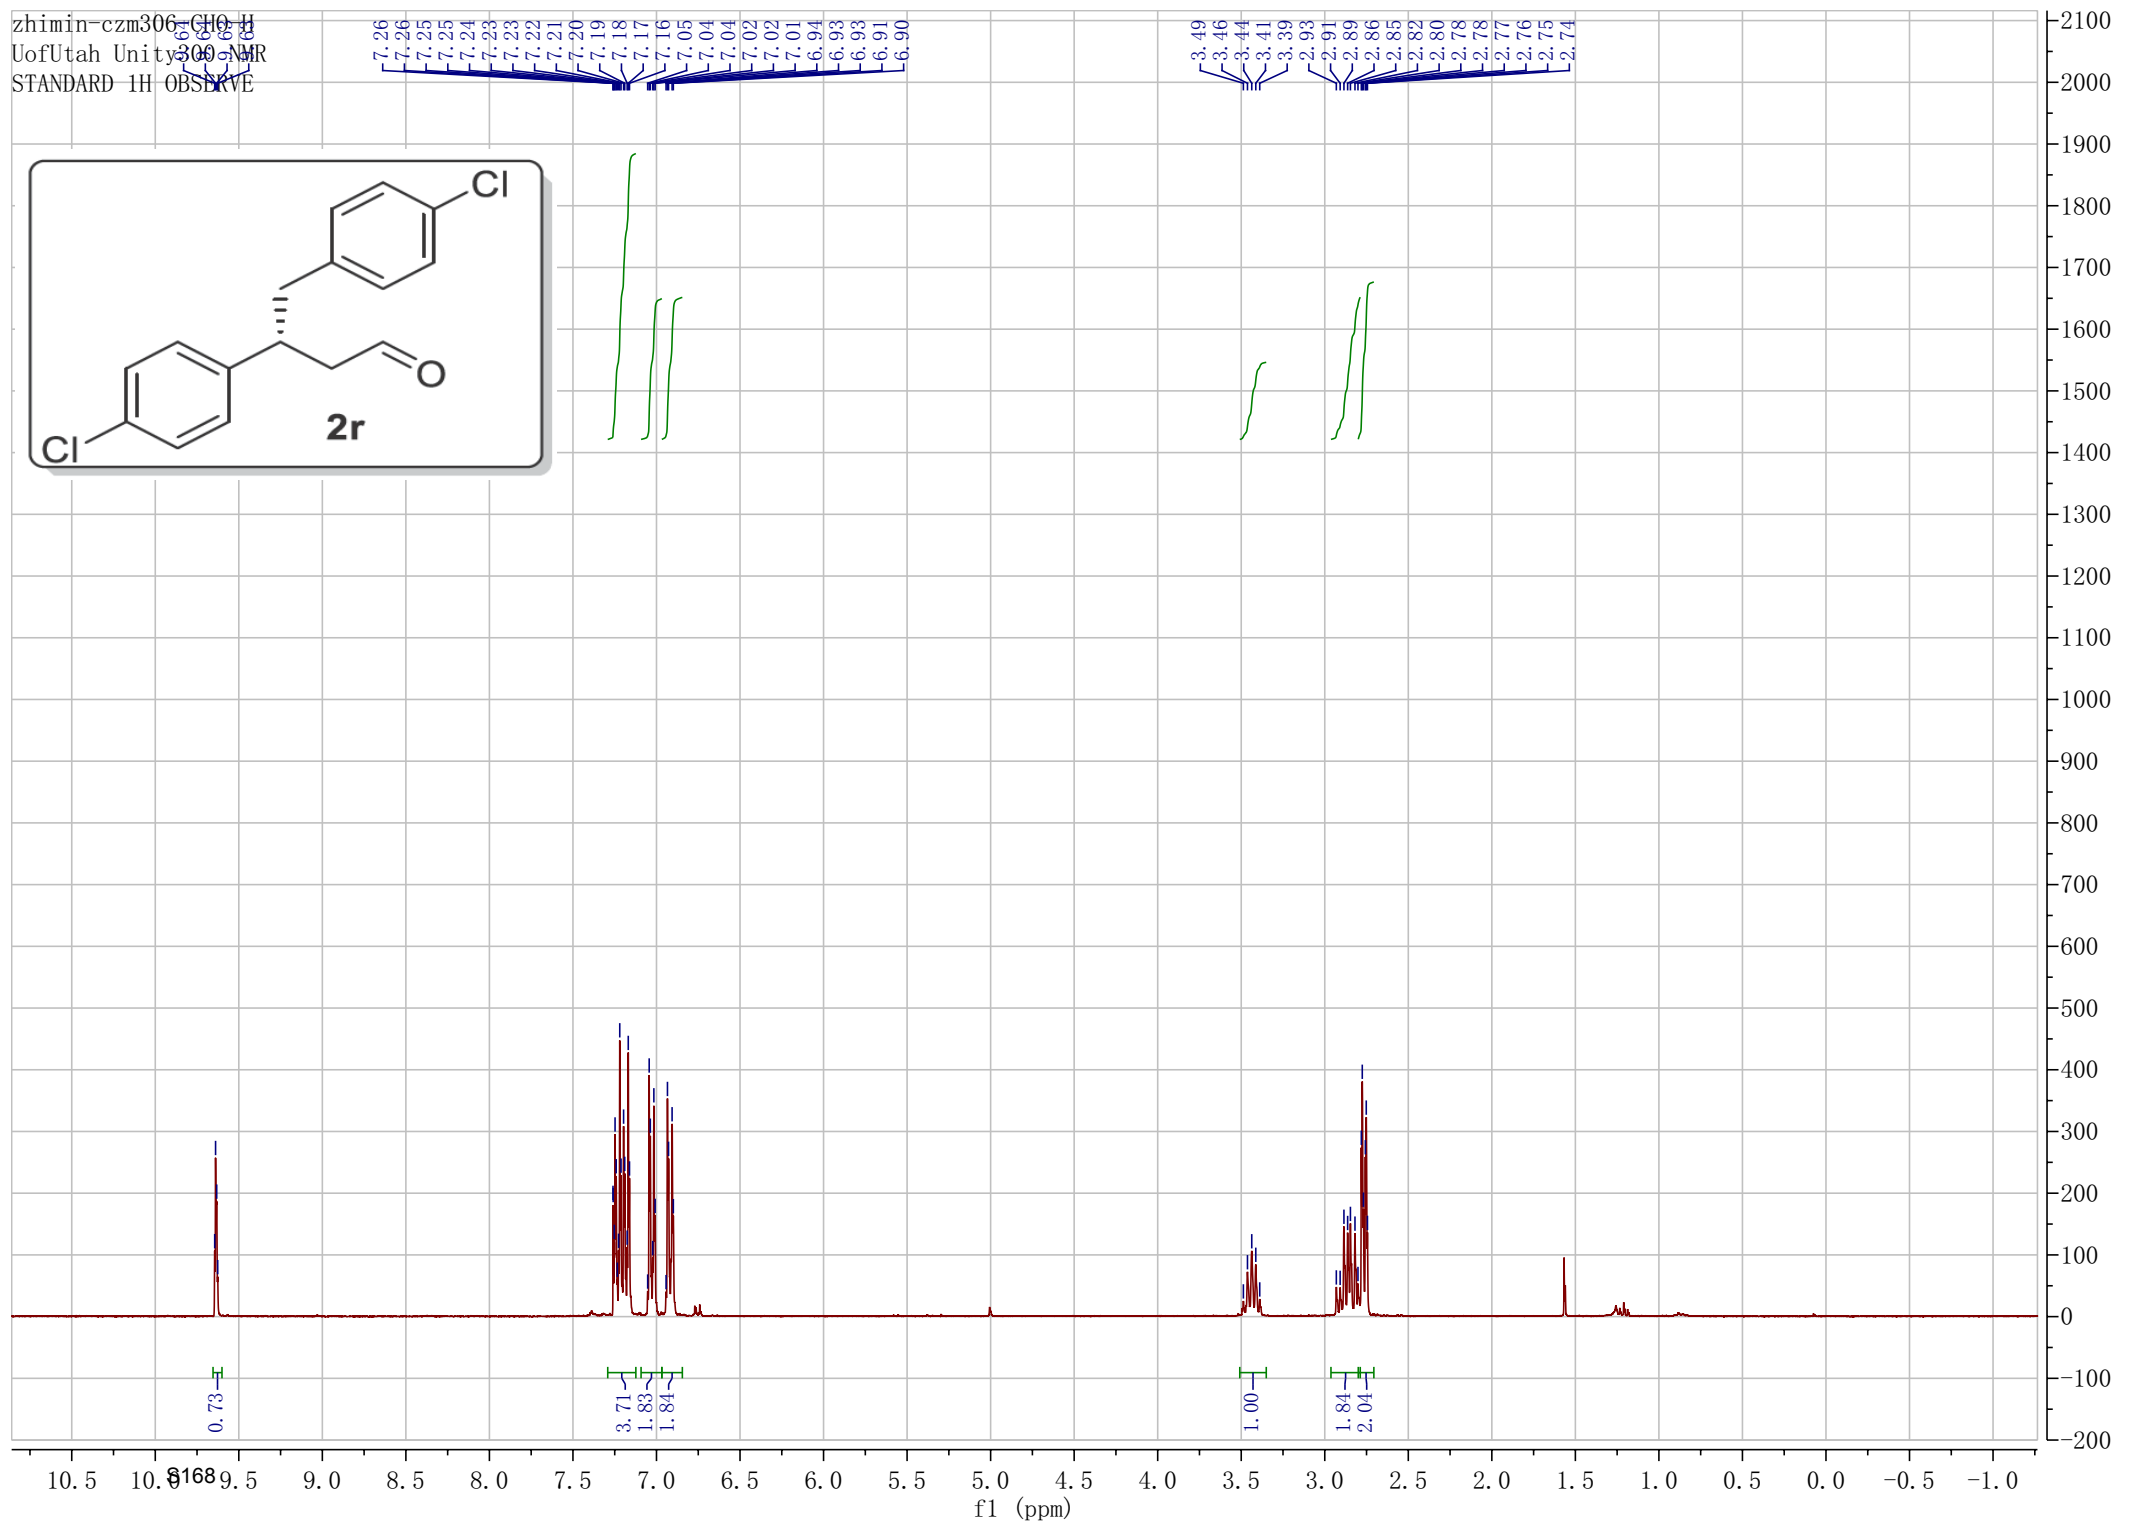

zhimin-czm306-CHO-C  
STANDARD CARBON PARAMETERS

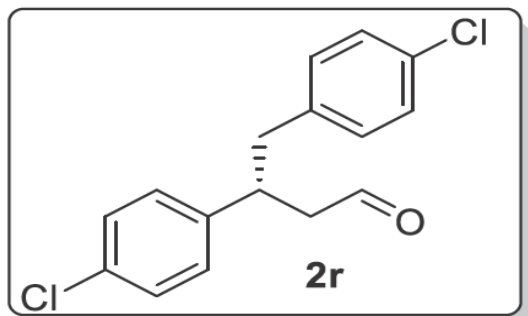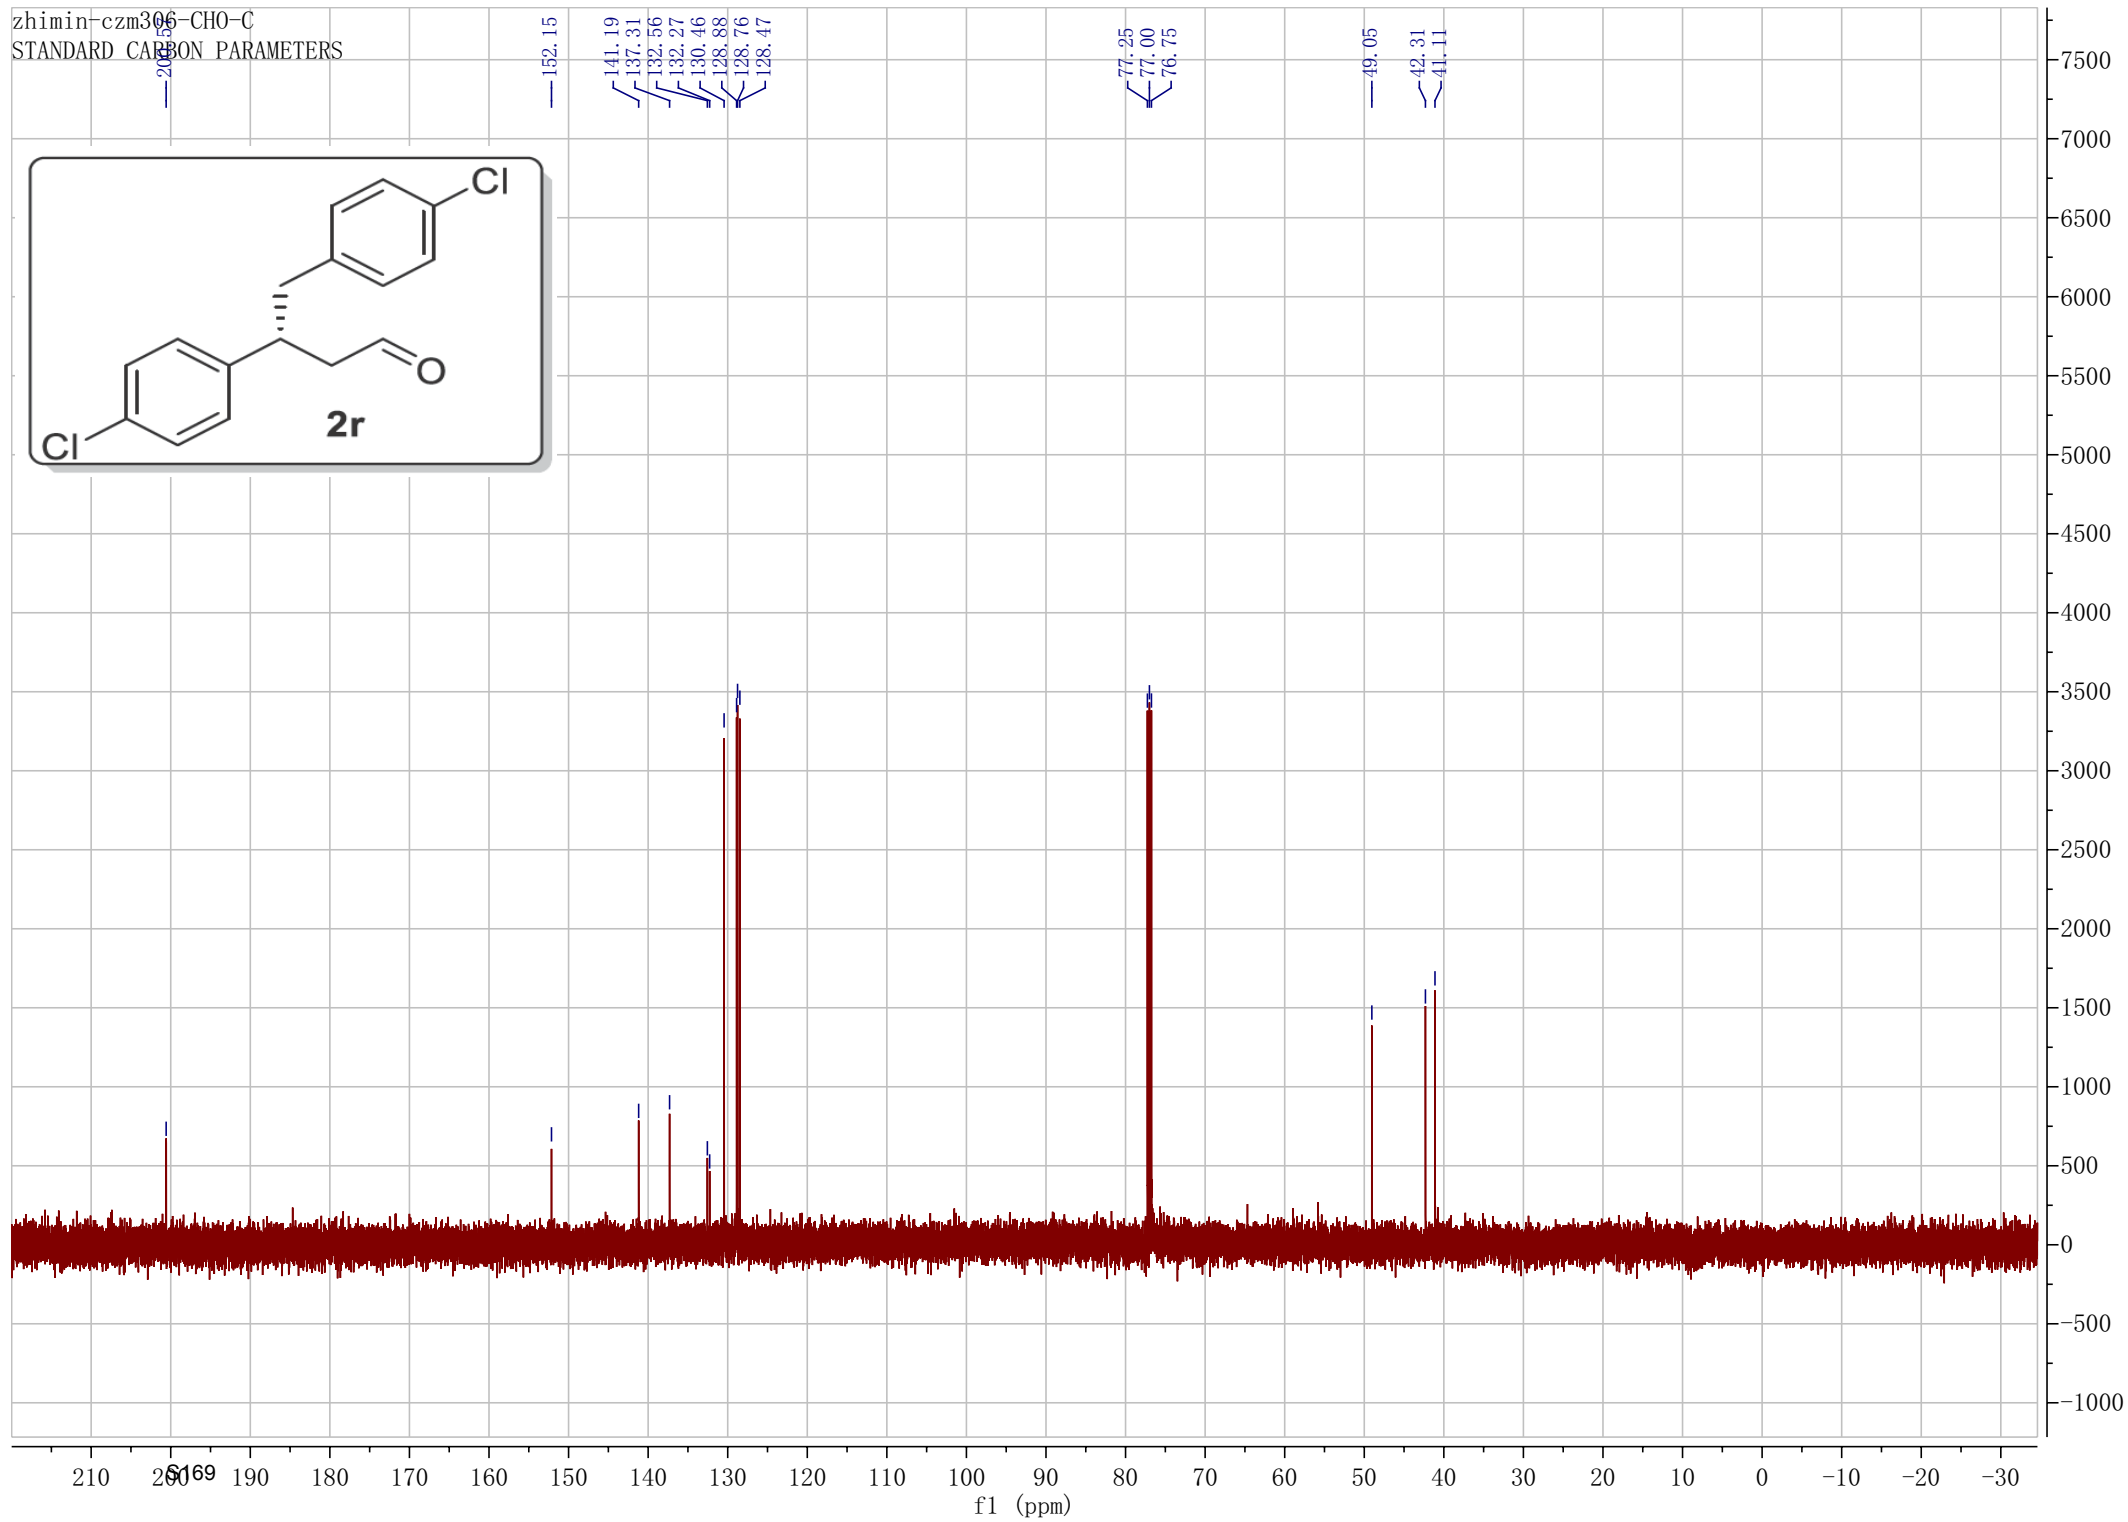

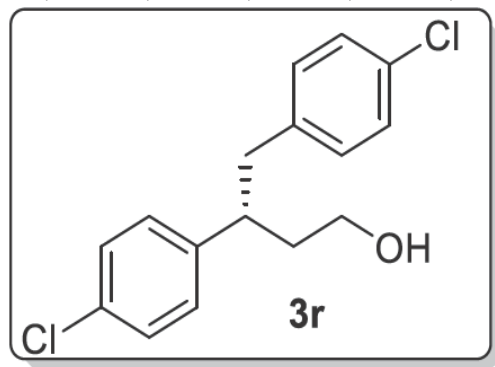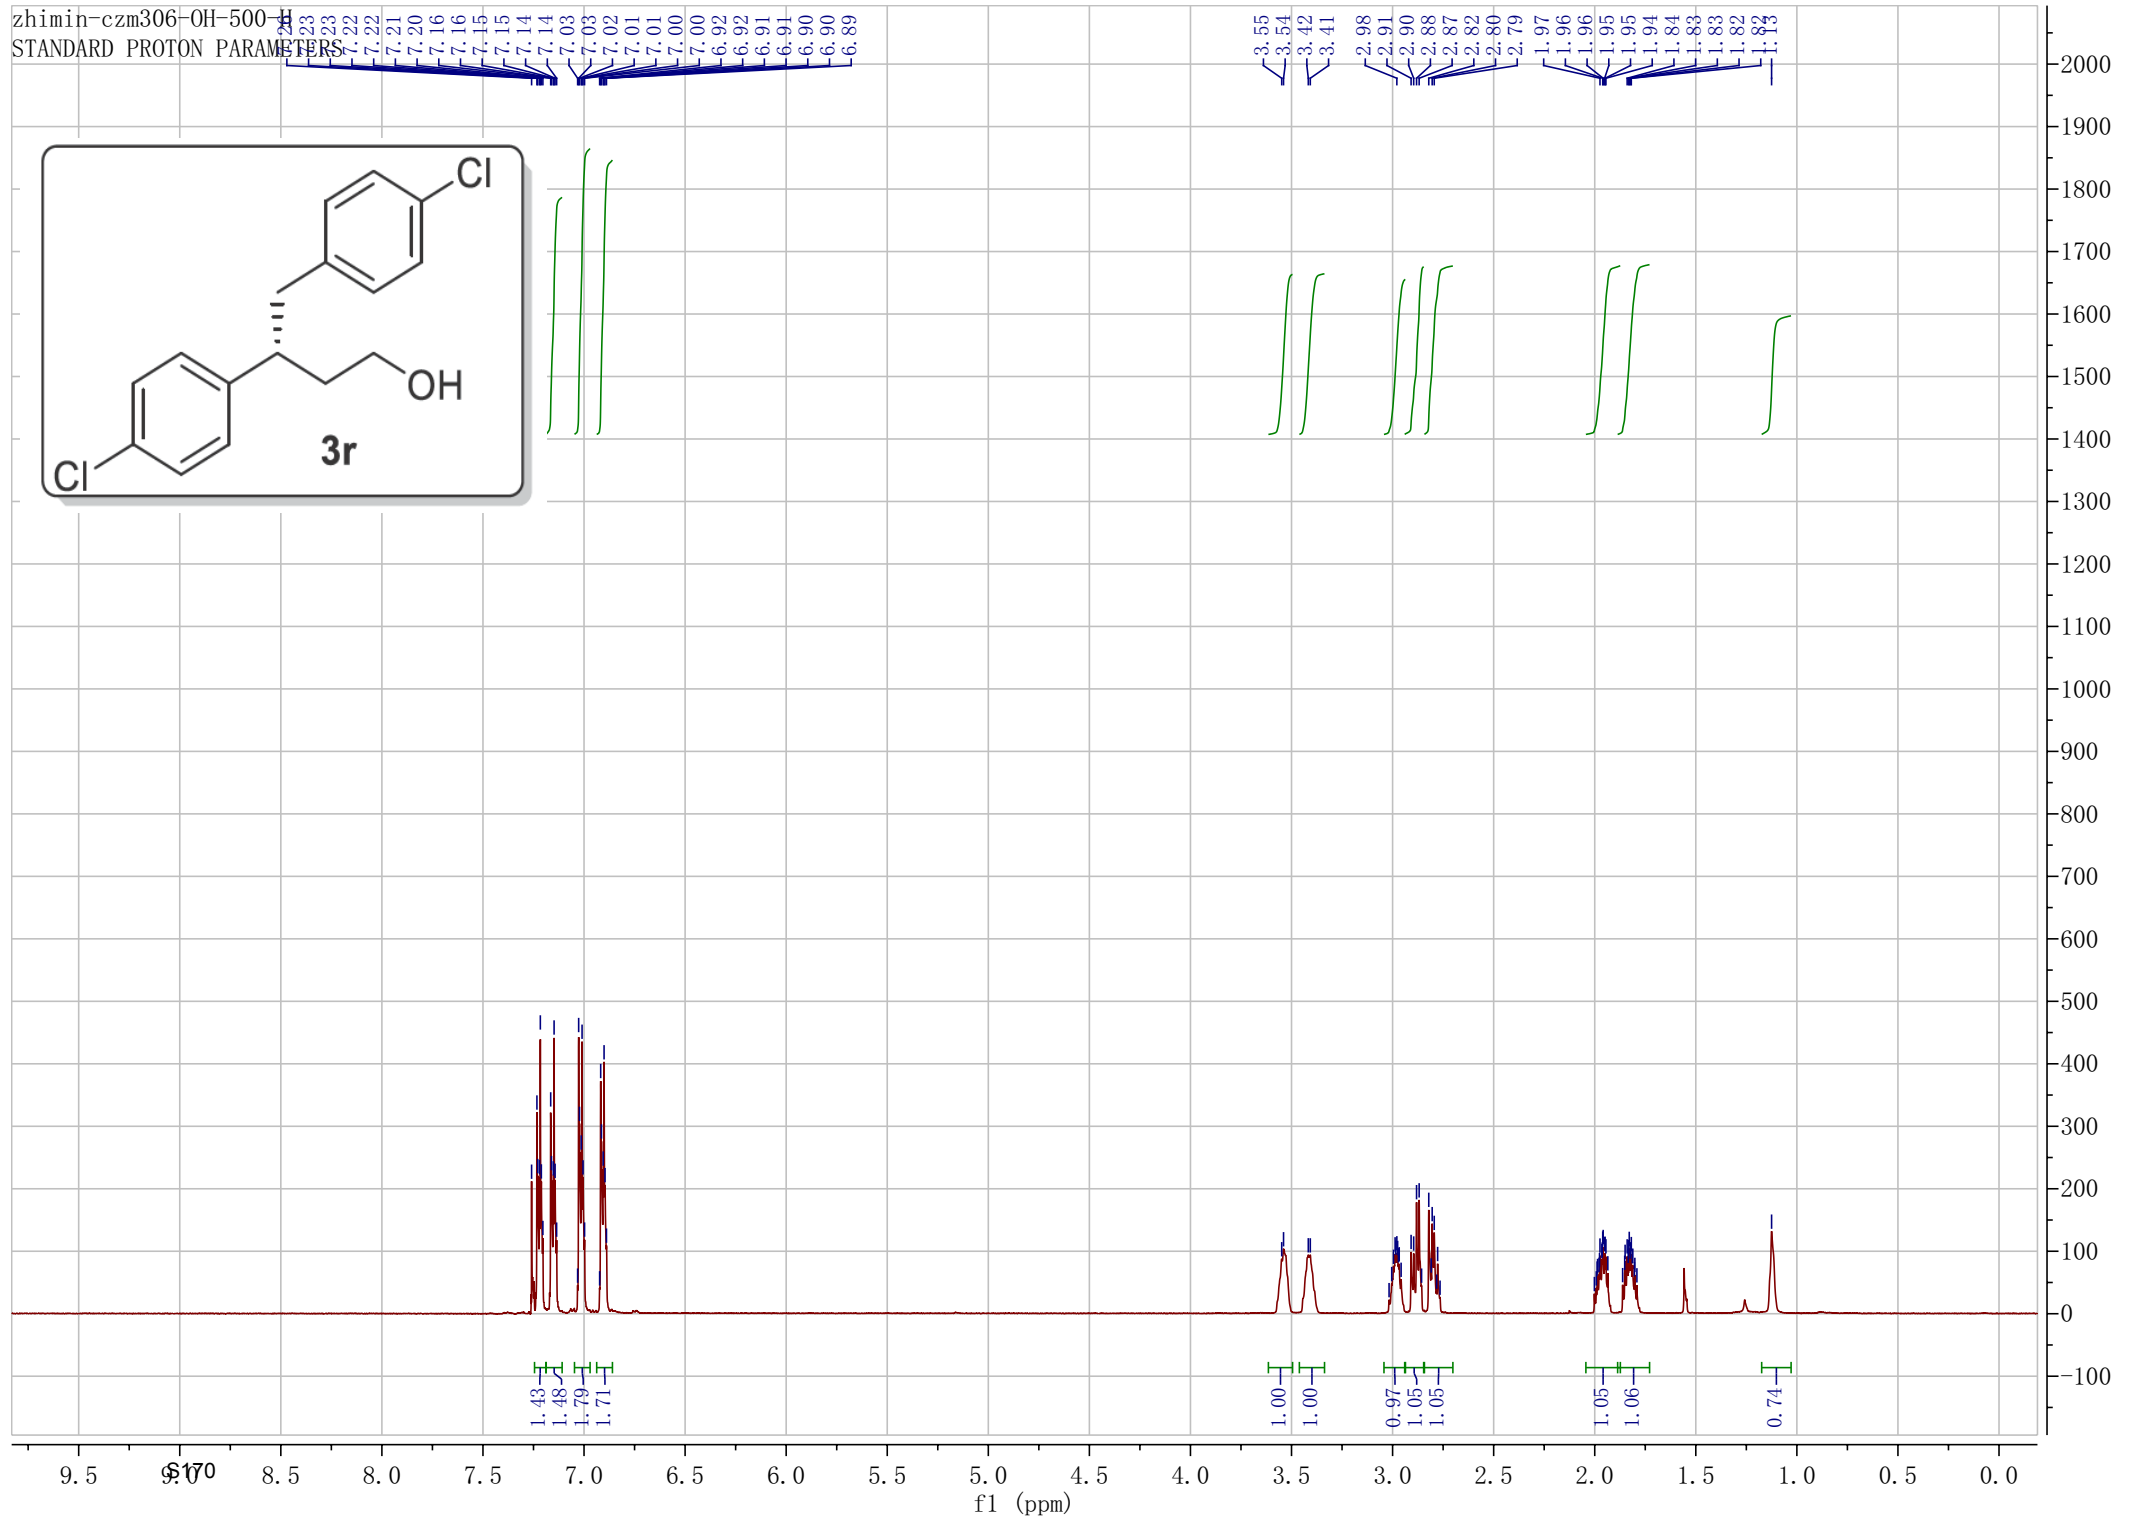



zhimin-czm306-OH-300-C  
13C OBSERVE

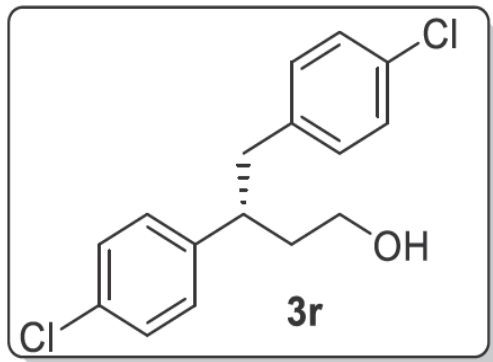

142.14  
138.25  
132.06  
131.78  
130.39  
129.03  
128.58  
128.26

77.42  
77.00  
76.58

60.62

43.70  
42.94

38.21

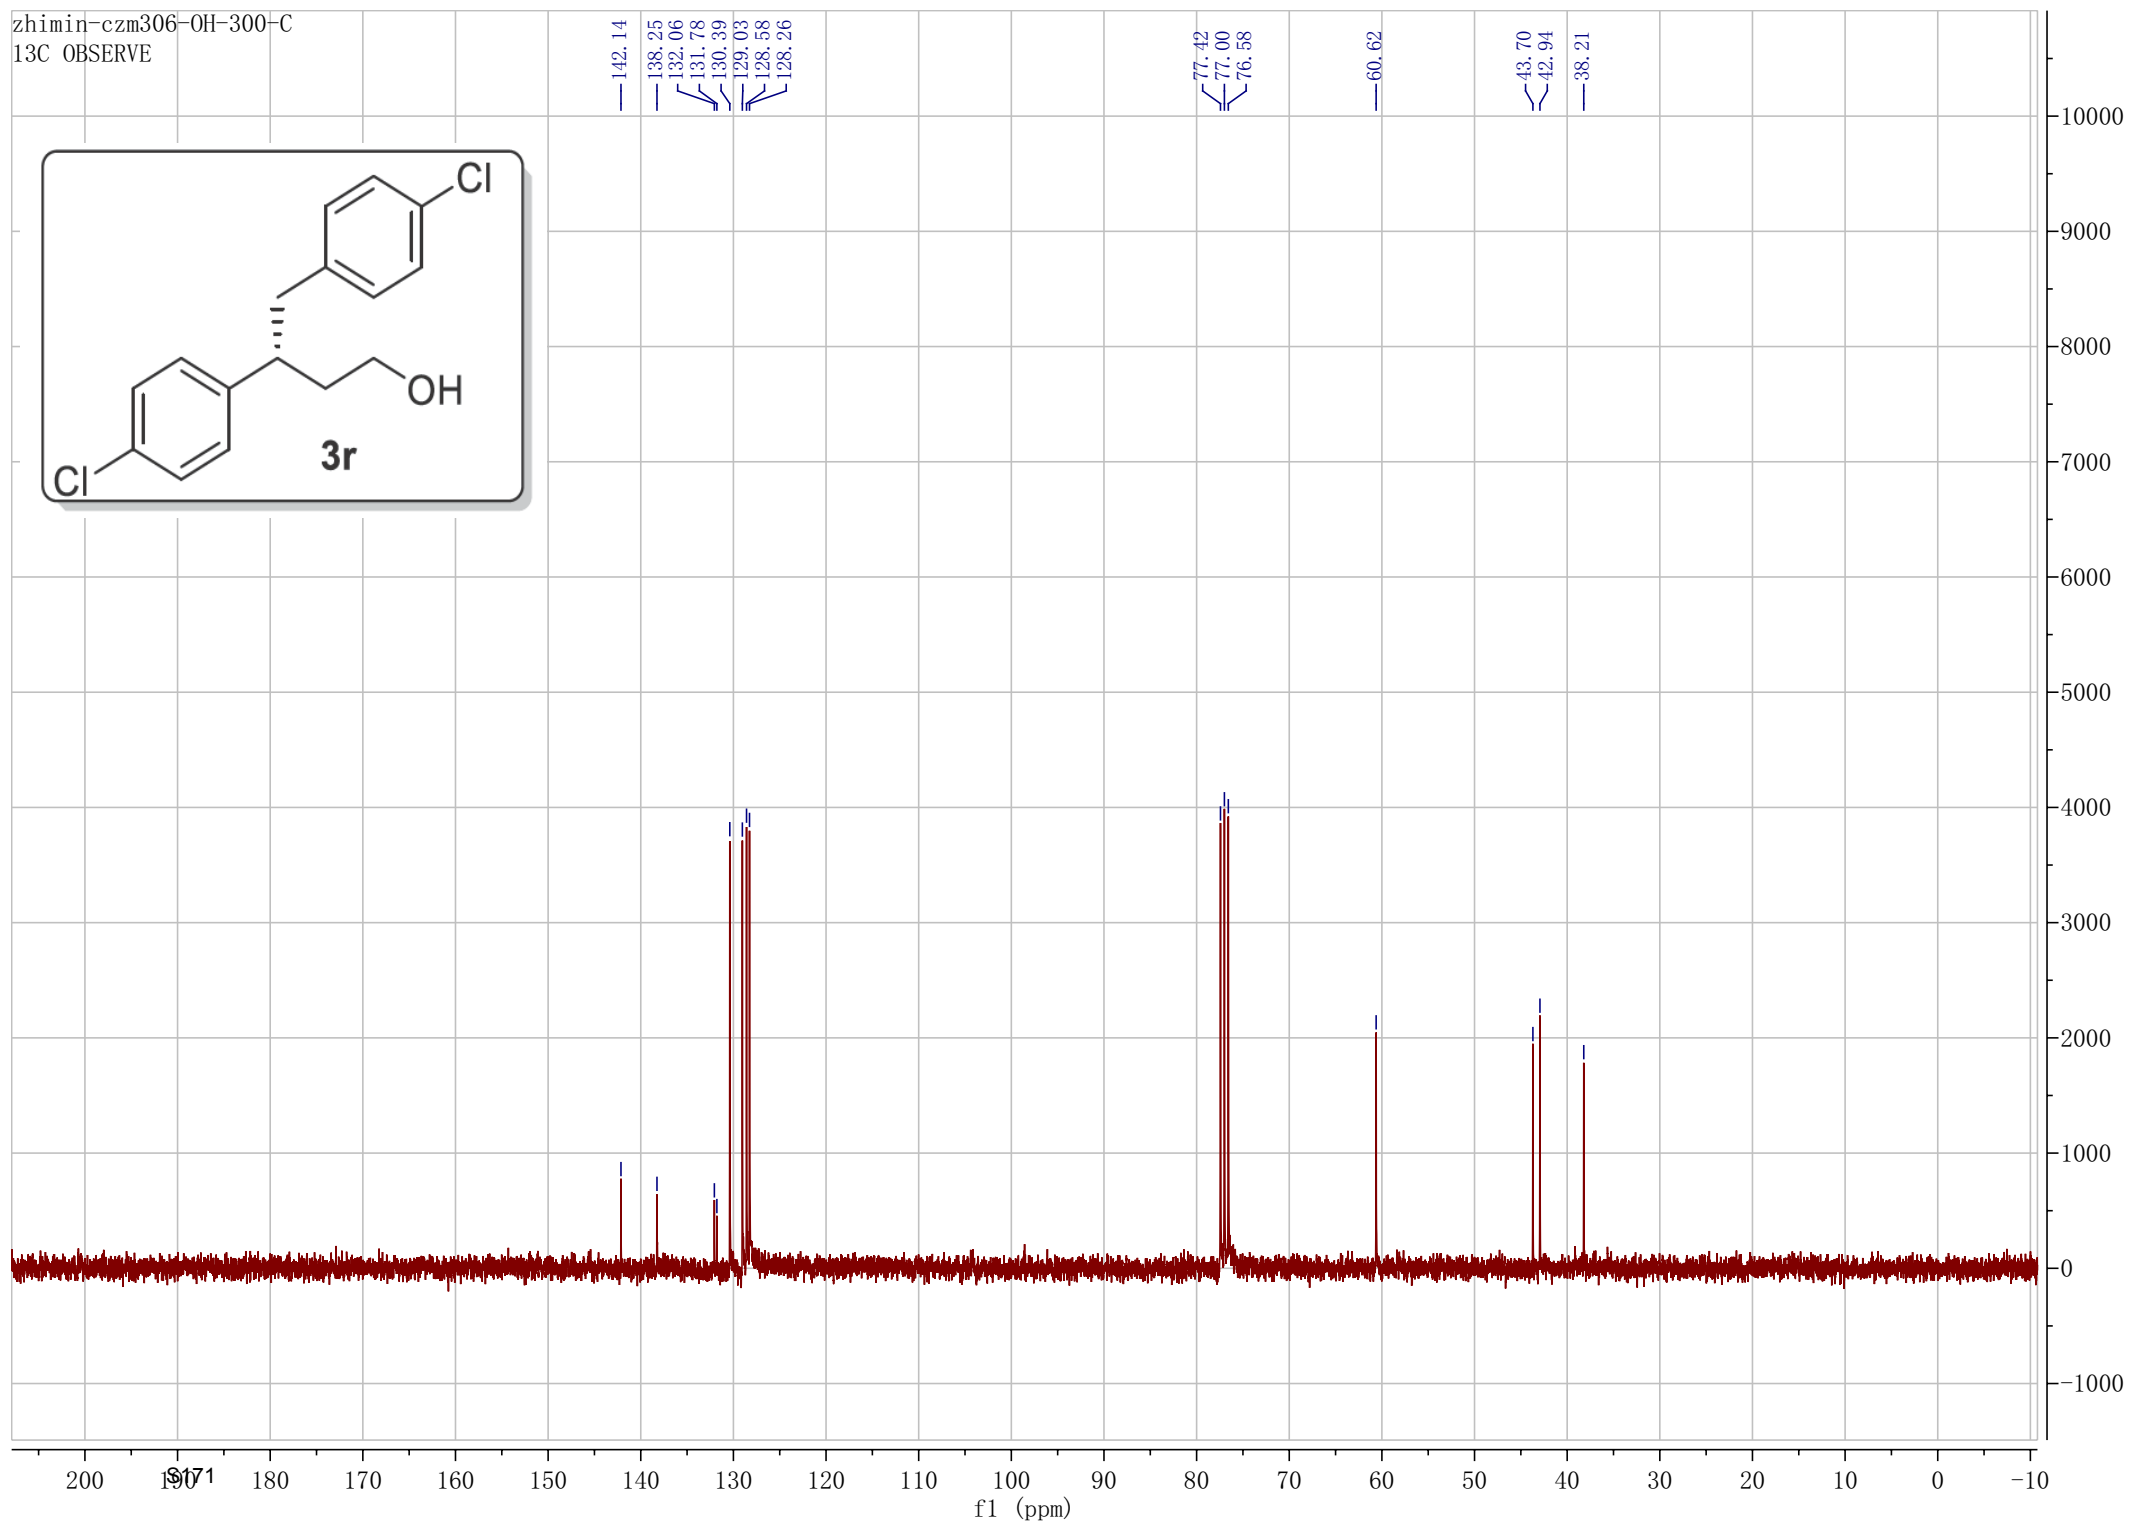

zhimin-czm362-CHO-500-H  
STANDARD PROTON PARAMETERS

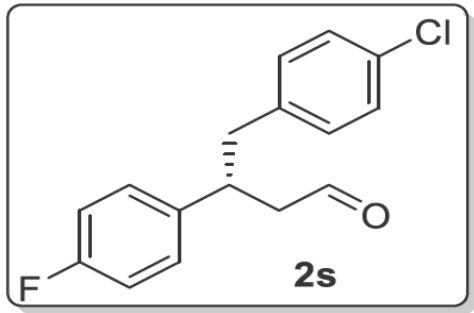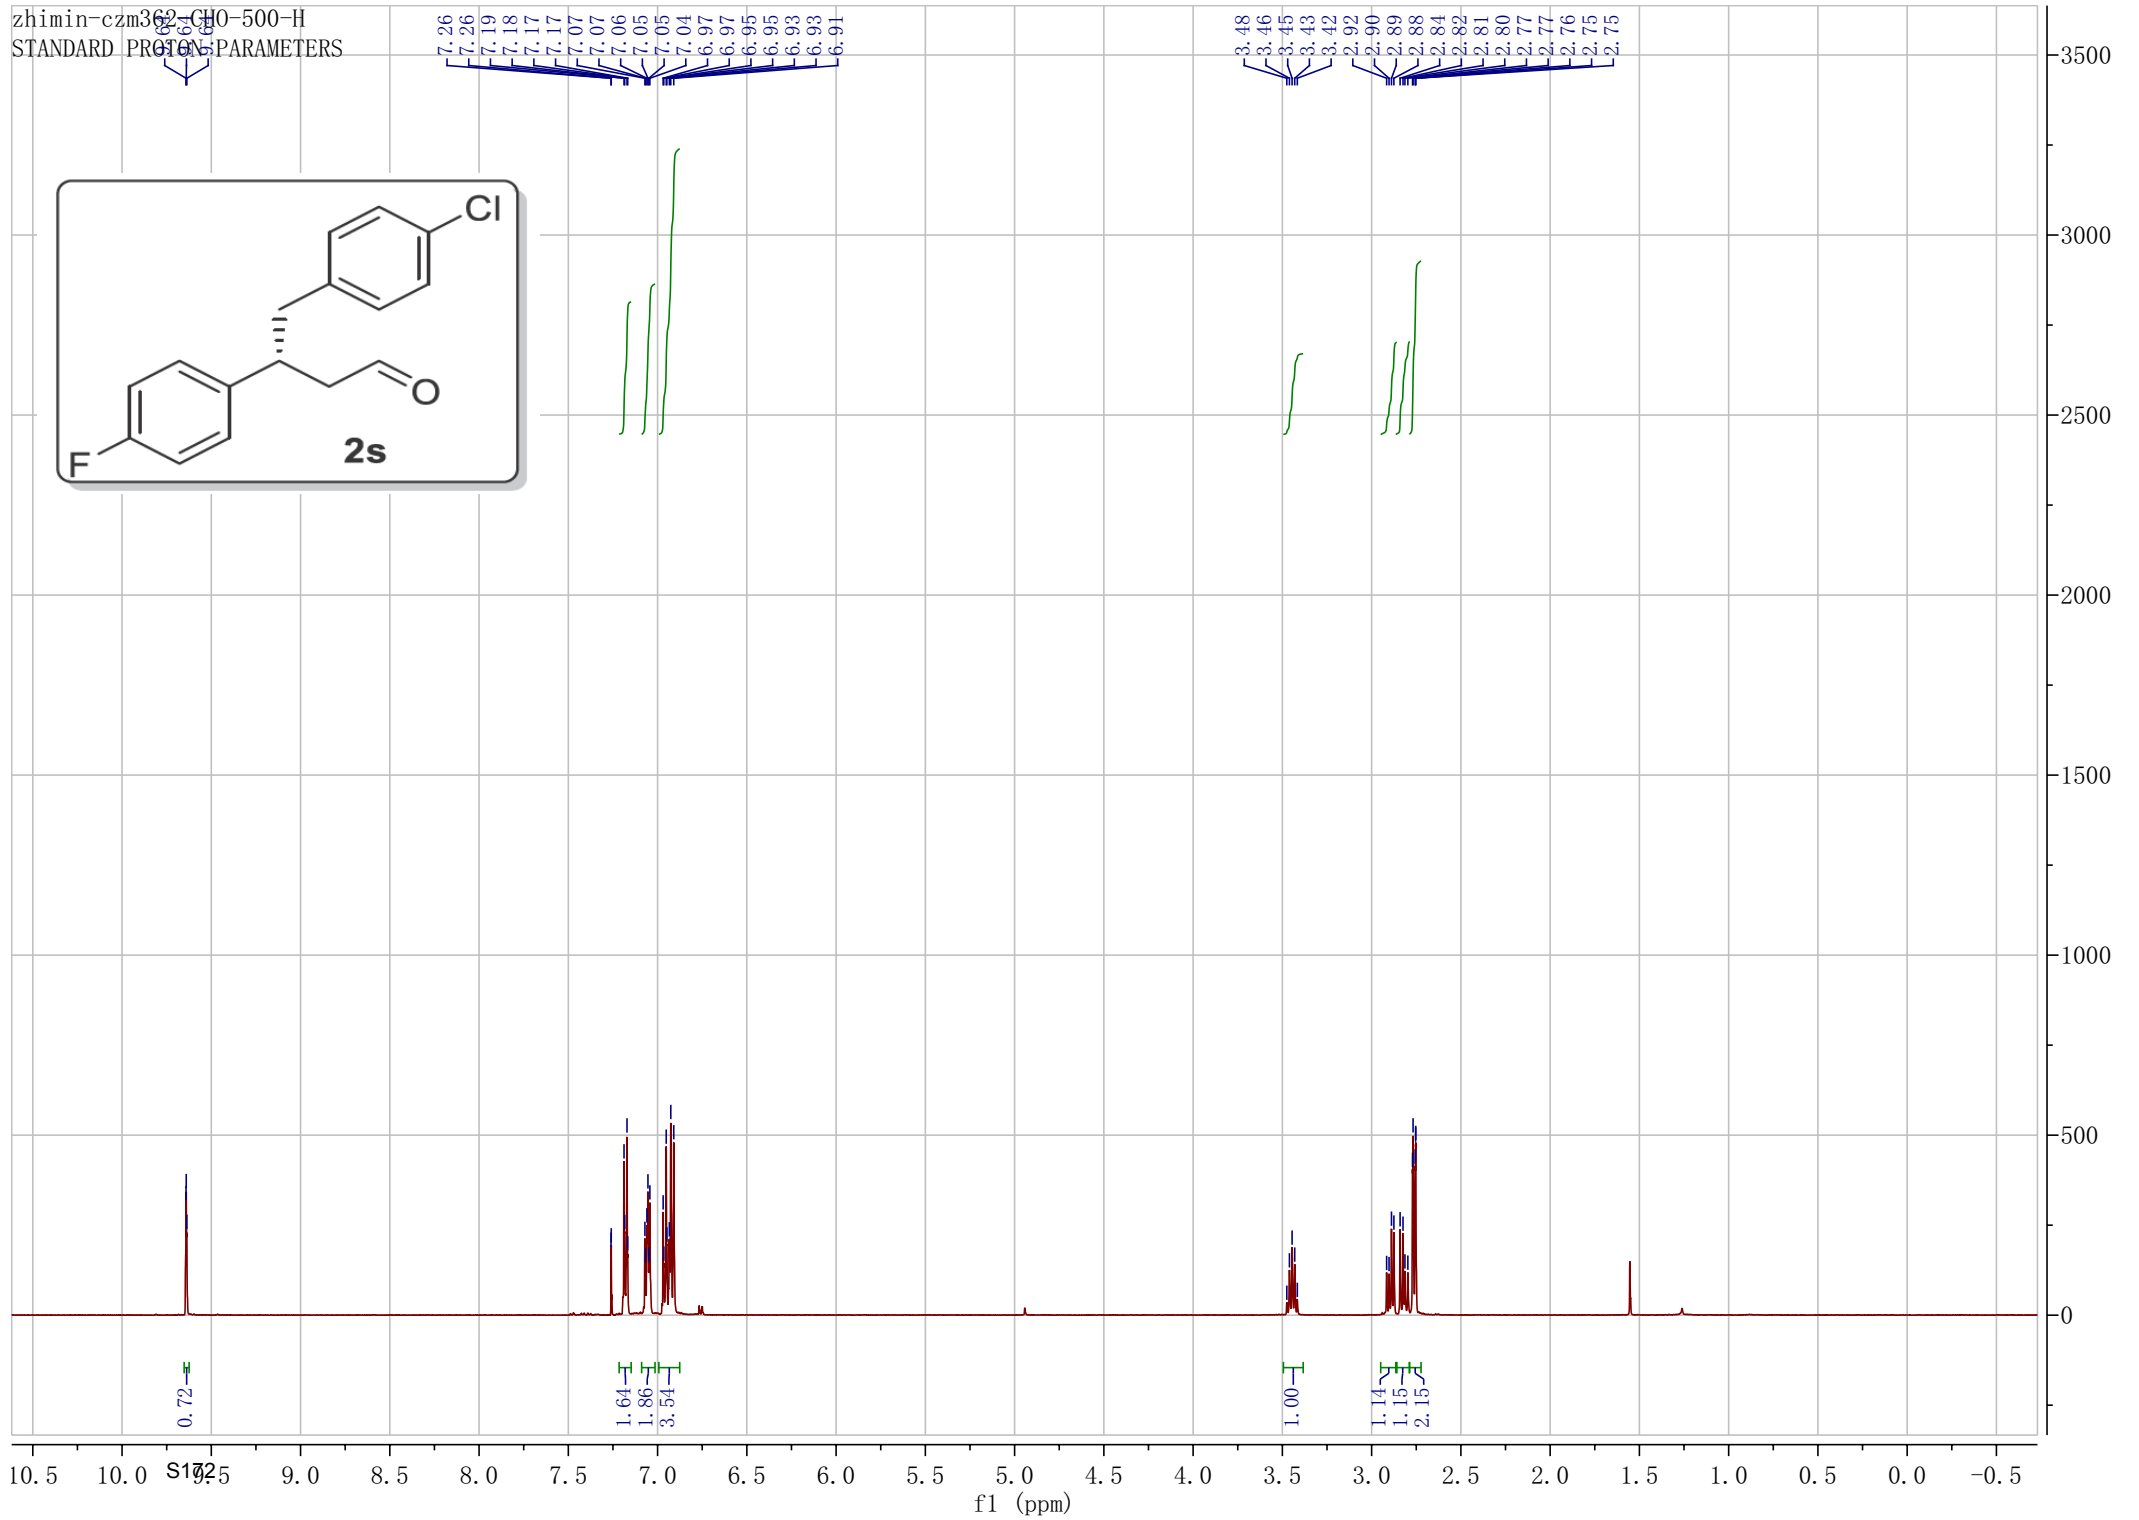

zhimin-czm362-CHO-300-C  
13C OBSERVE

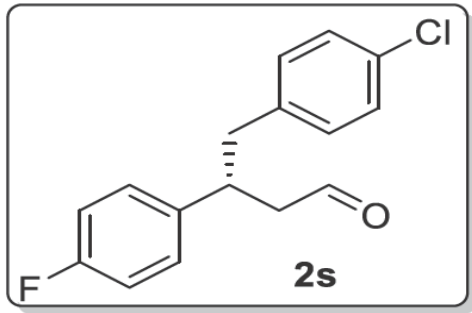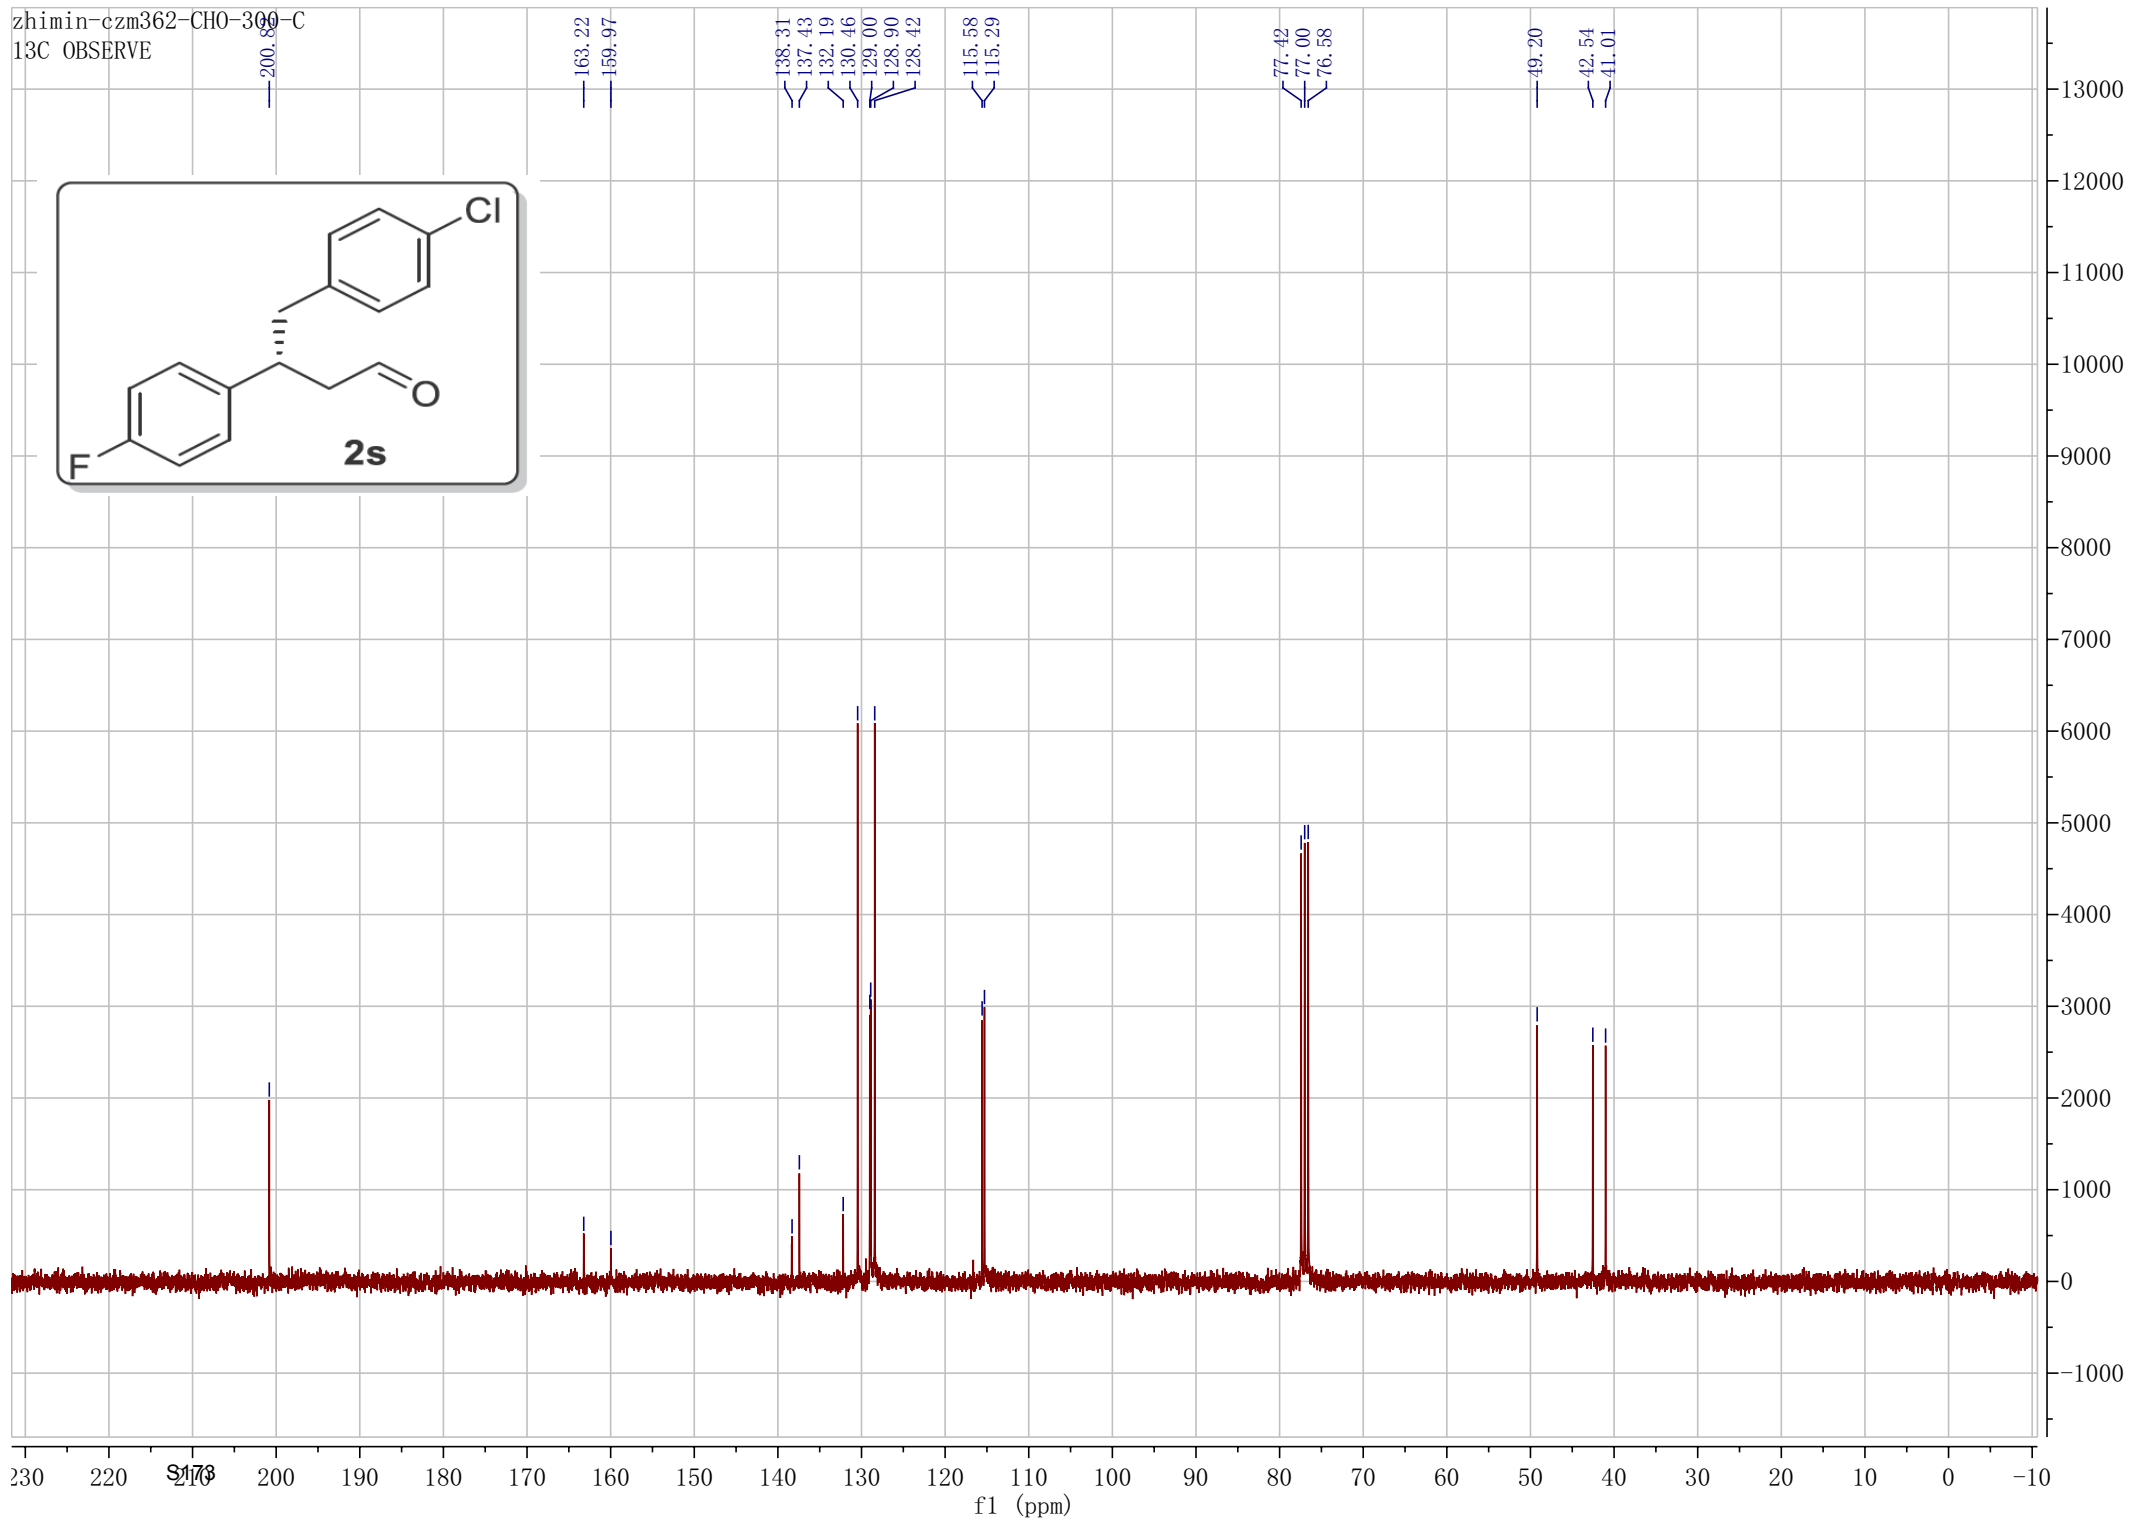

zhimin-czm362-CHO-300-F

19F OBSERVE

STANDARD PARAMETERS

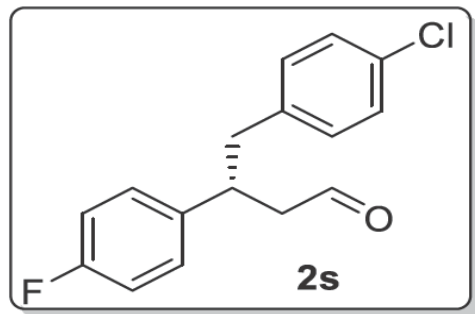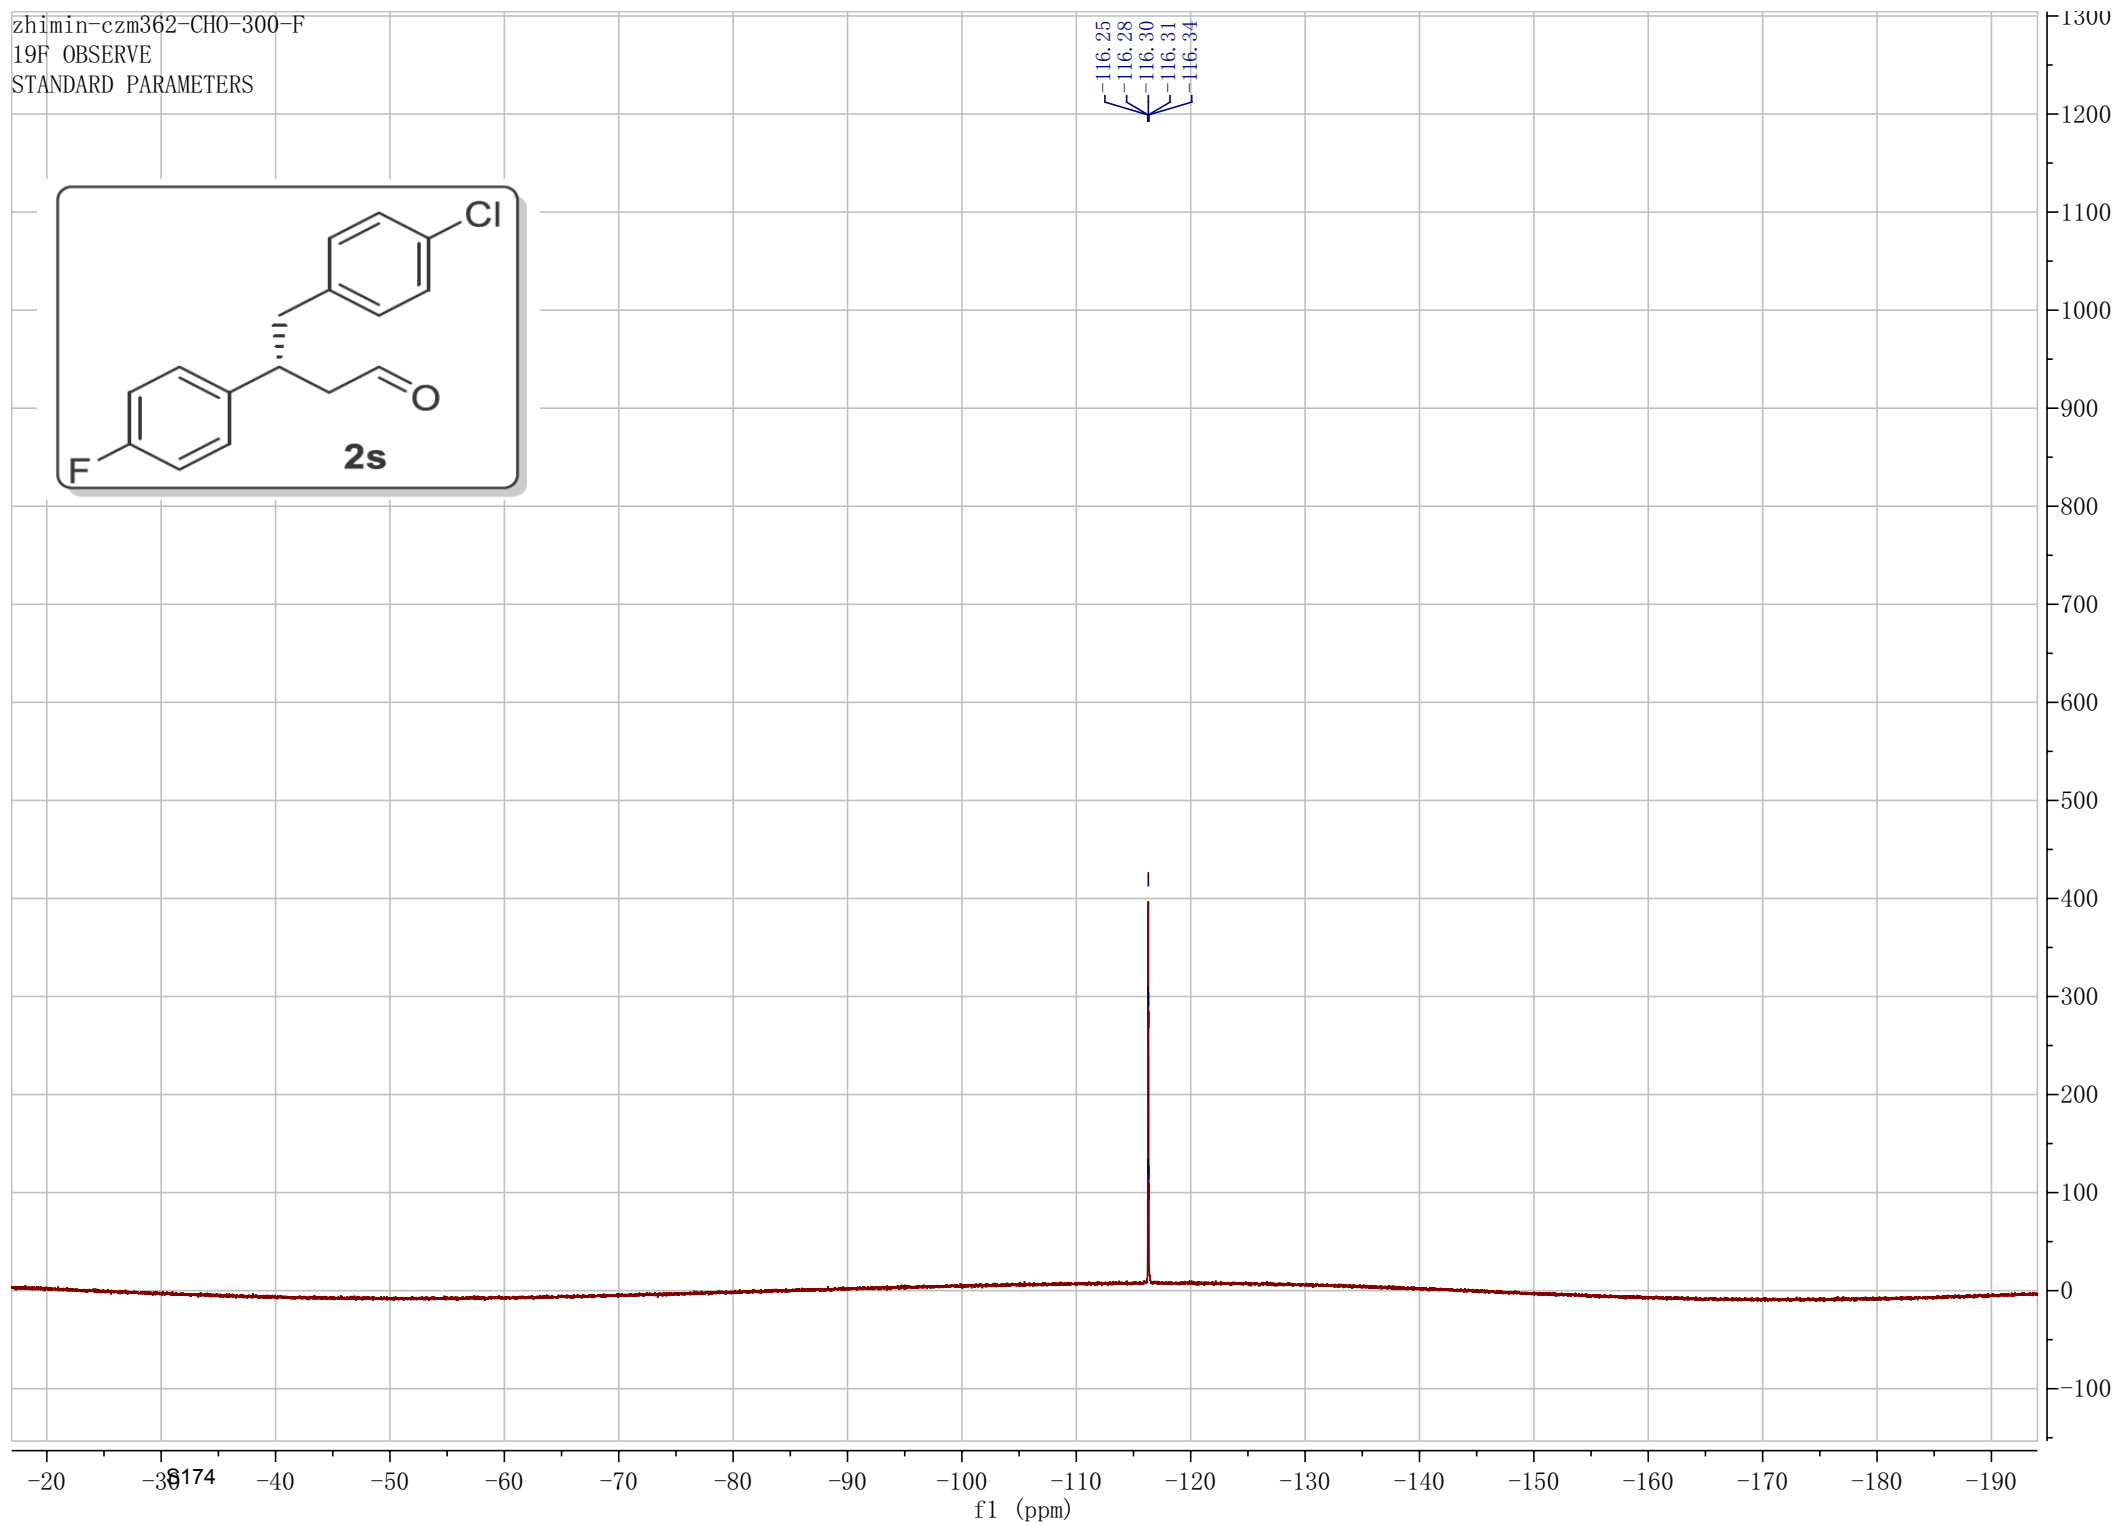

370-OH-500-H  
STANDARD-PROTON-PARAMETERS

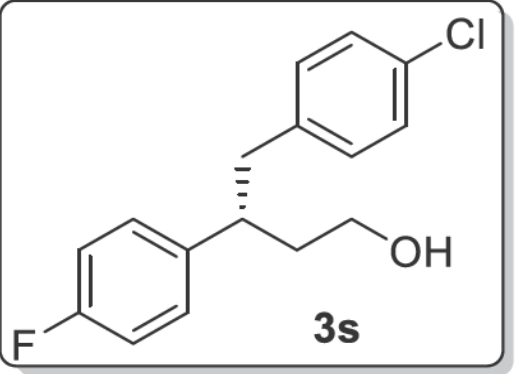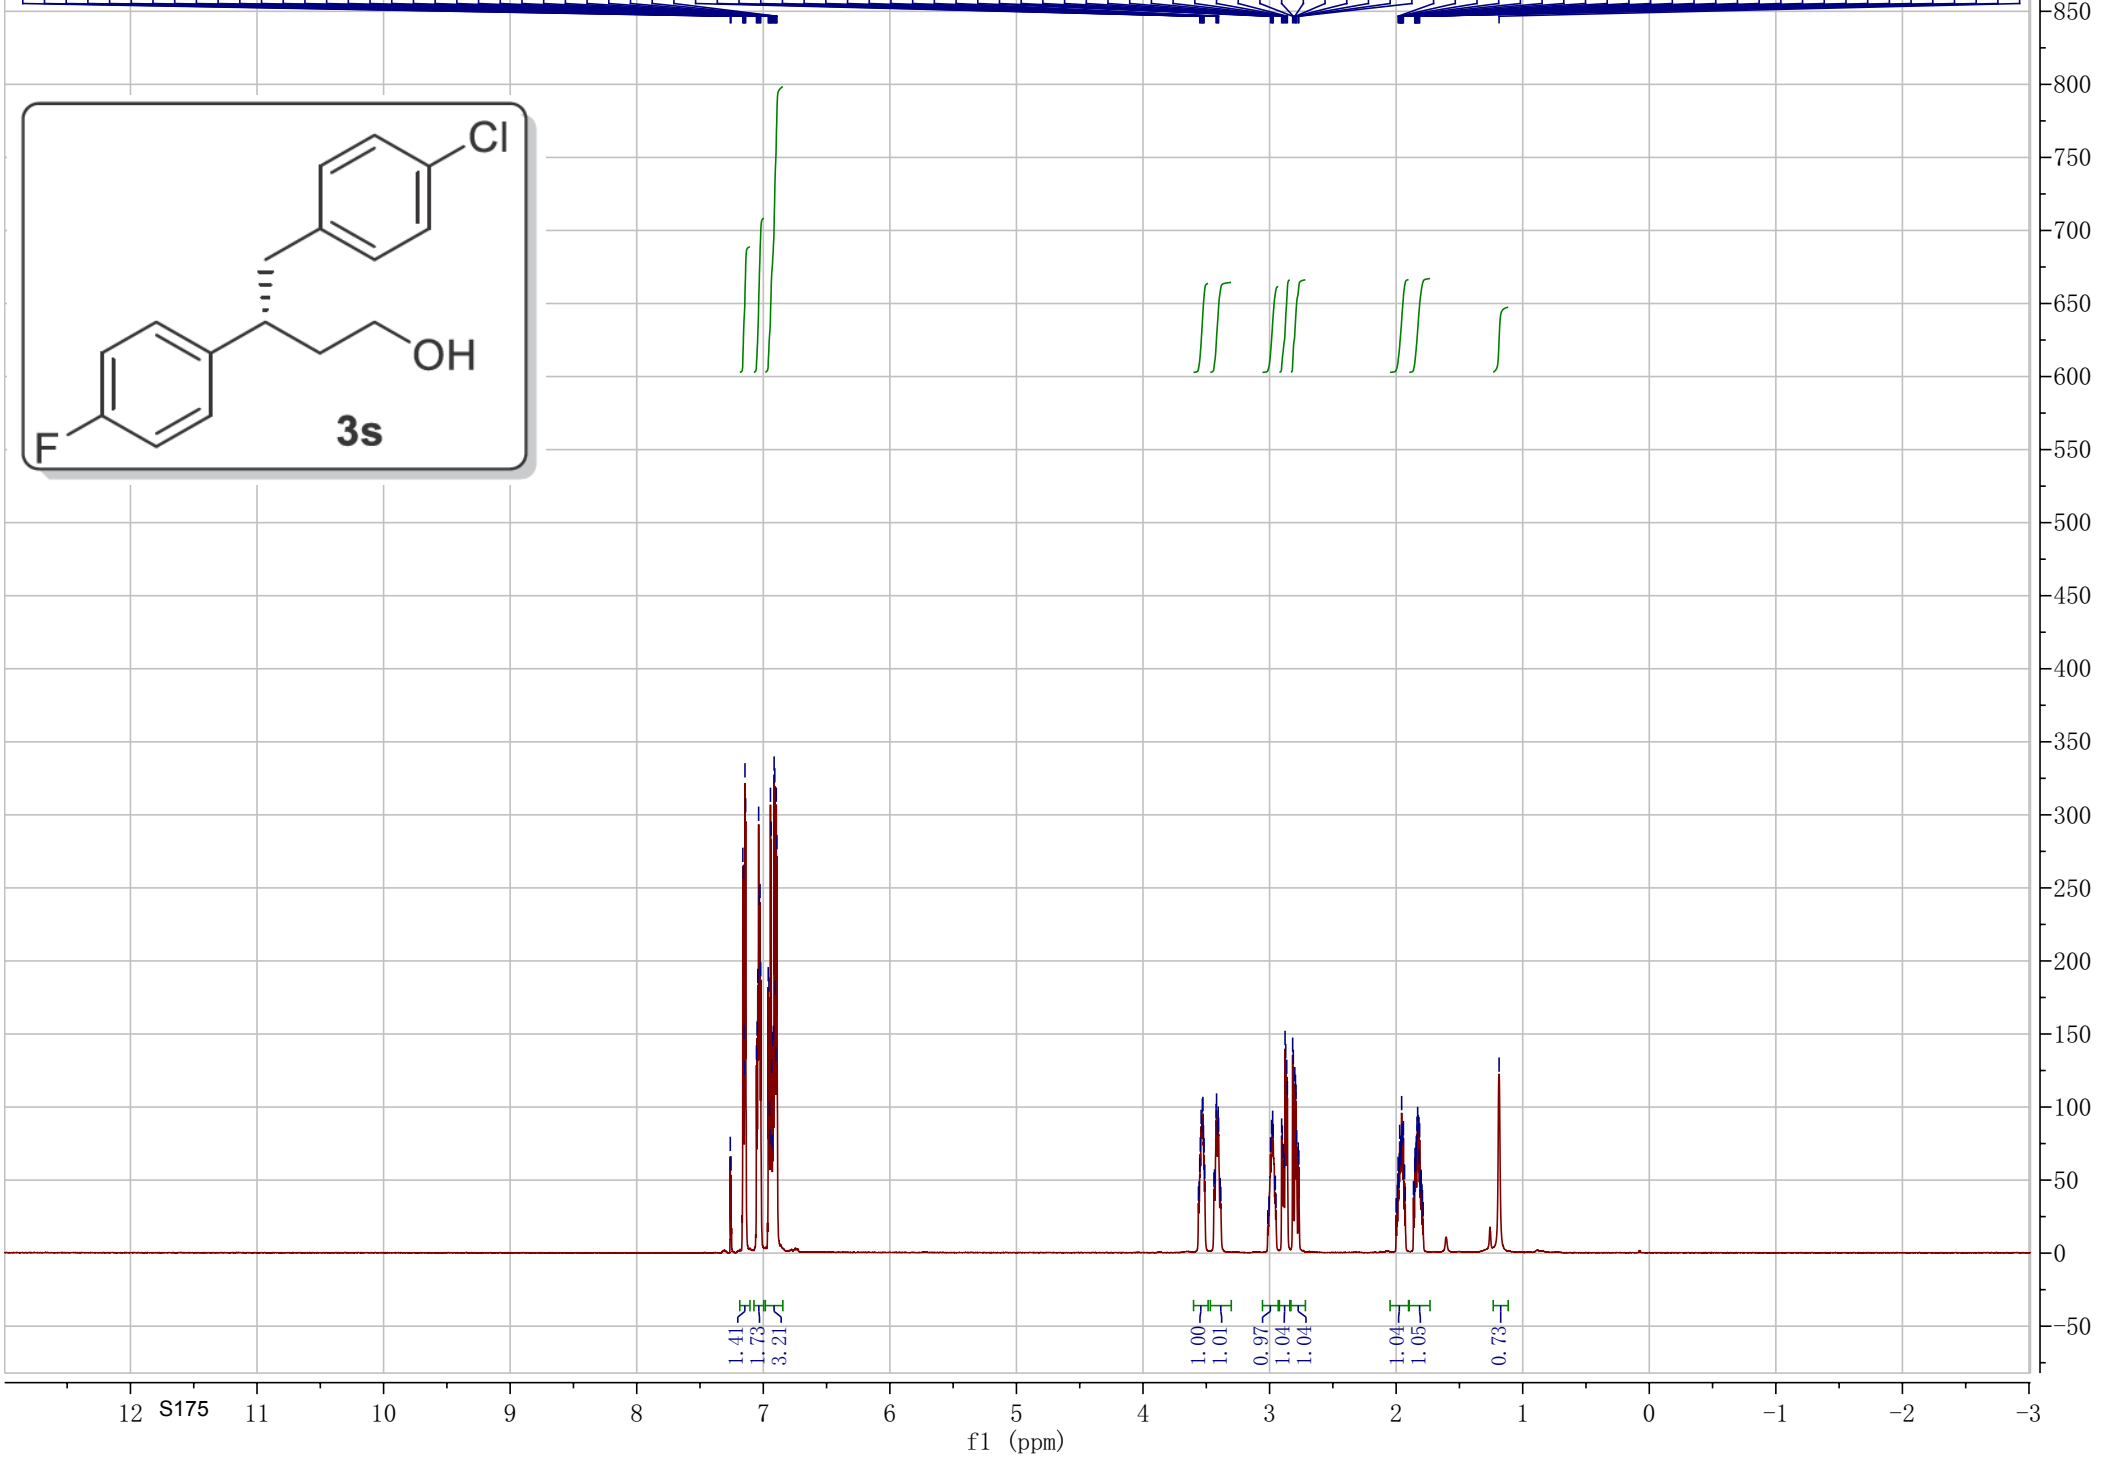

12 S175 11 10 9 8 7 6 5 4 3 2 1 0 -1 -2 -3

f1 (ppm)

zhimin-czm370-OH-300-C  
13C OBSERVE

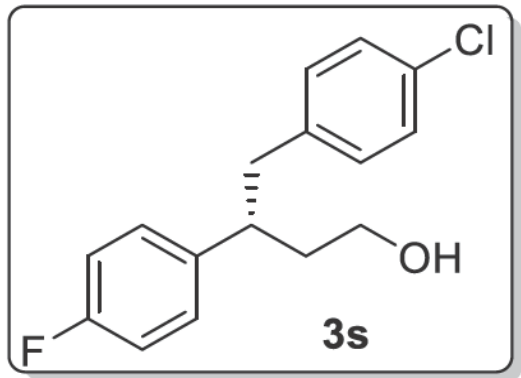

163.02  
159.78

139.24  
139.20  
138.40  
131.69  
130.40  
129.05  
128.95  
128.20

115.36  
115.08

77.42  
77.00  
76.58

60.67

43.55  
43.15

38.32

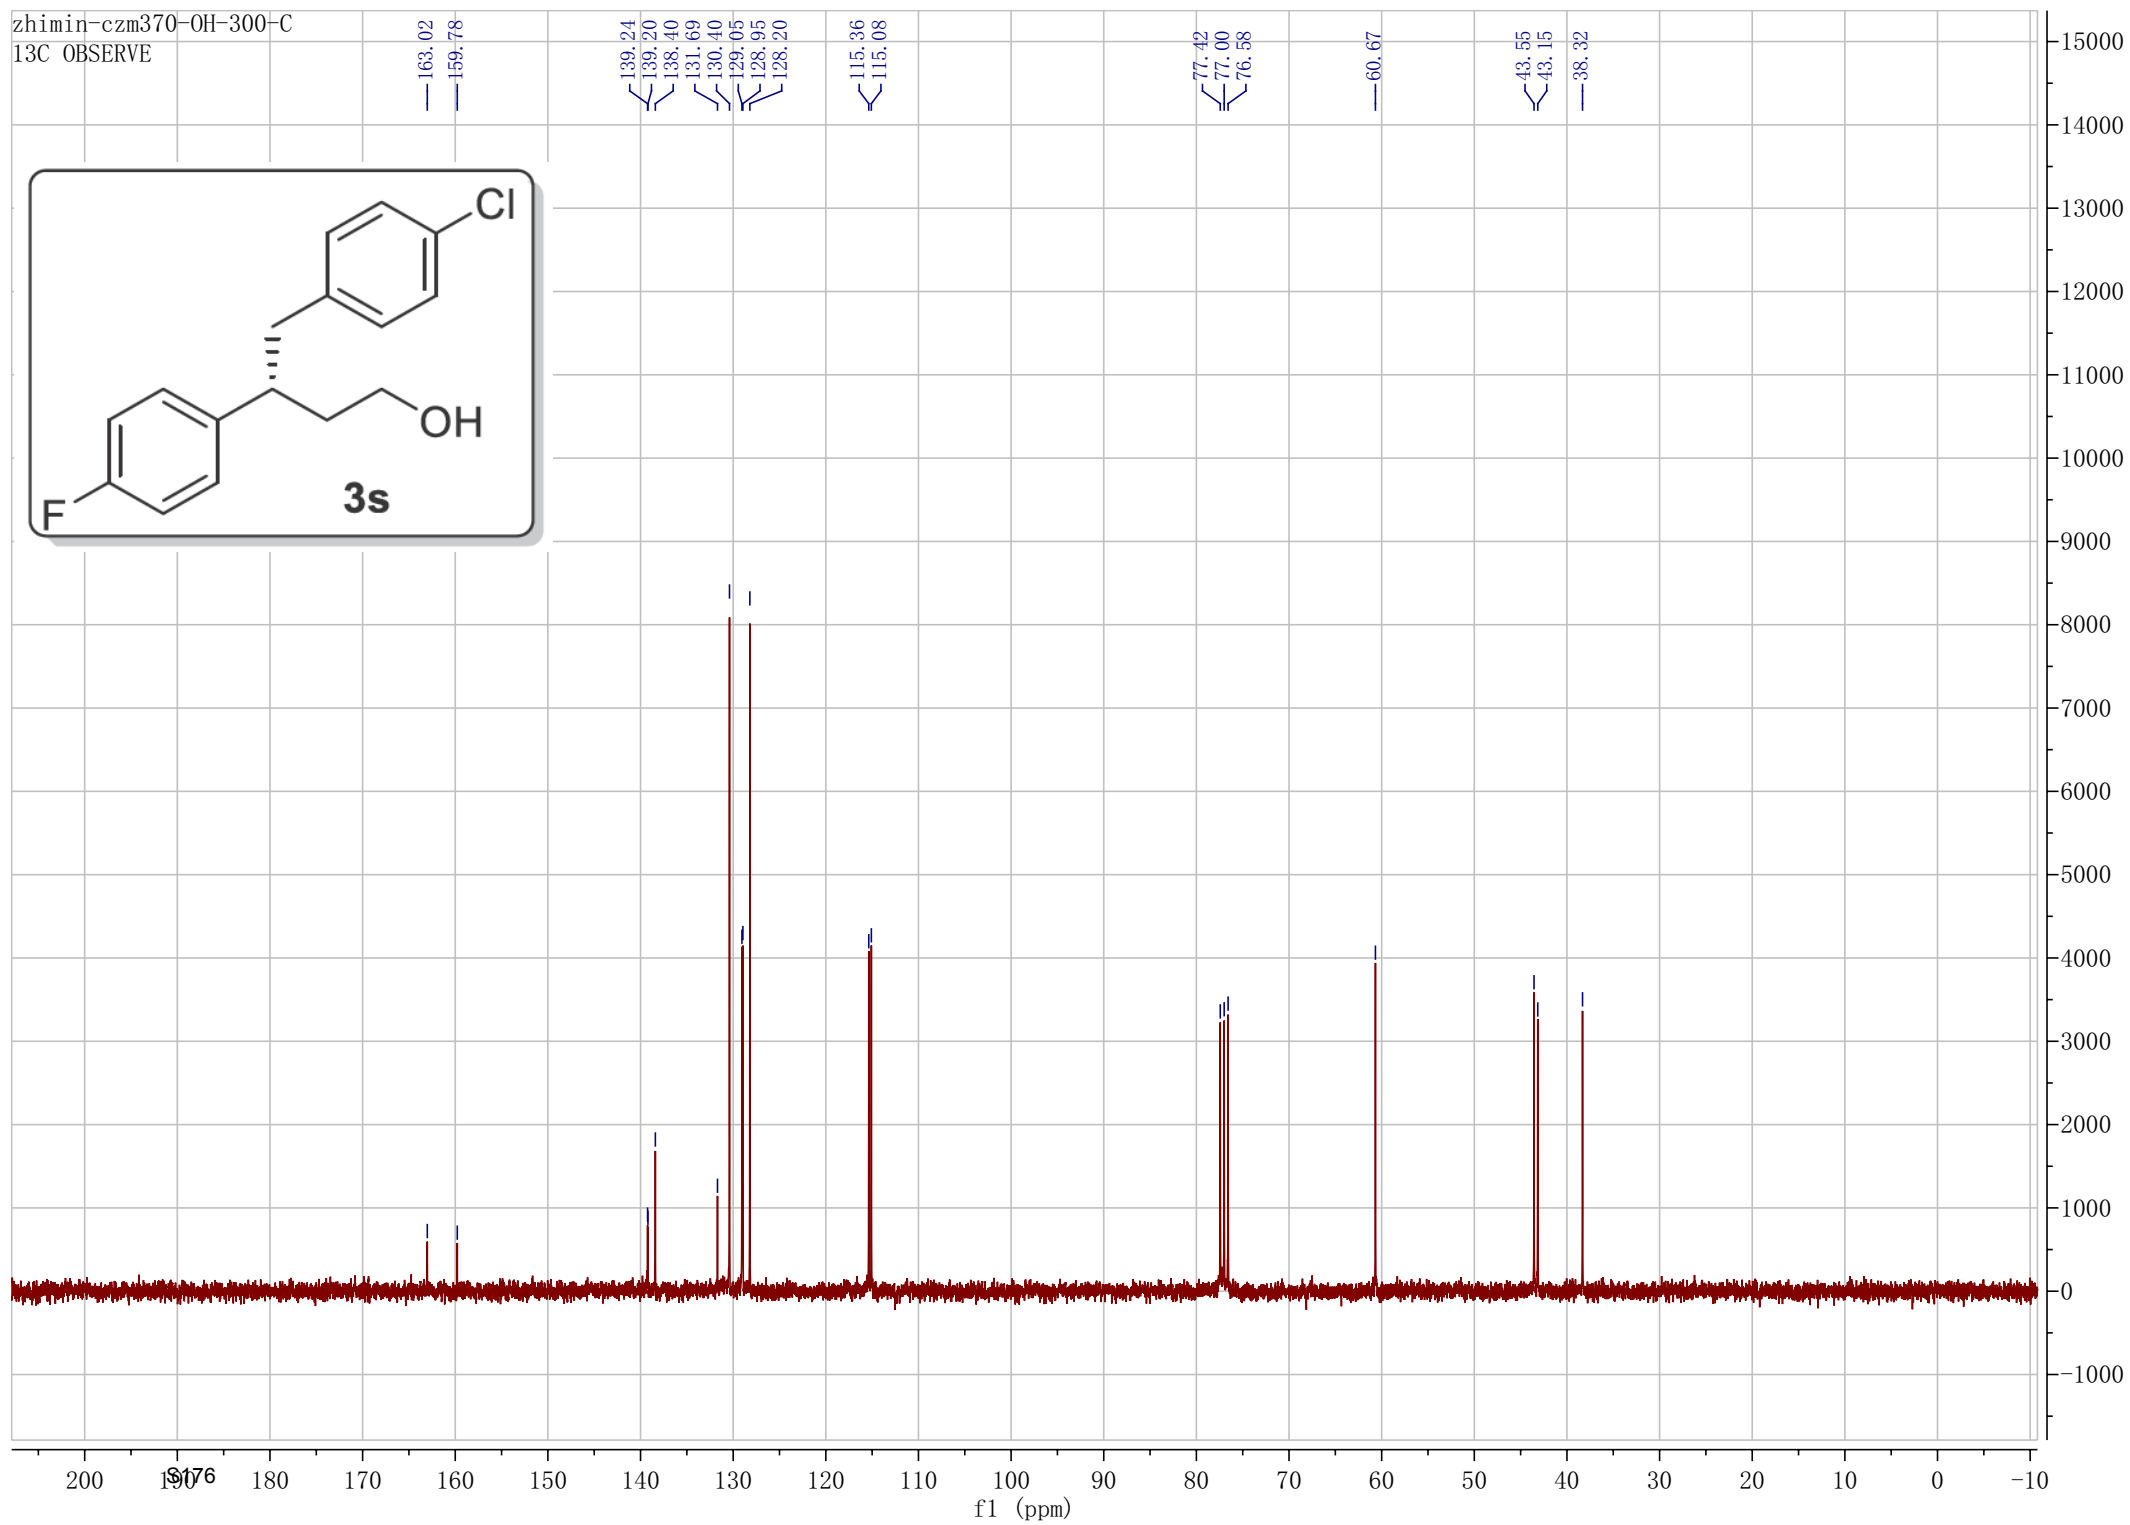

zhimin-czm370-OH-300-F  
19F OBSERVE  
STANDARD PARAMETERS

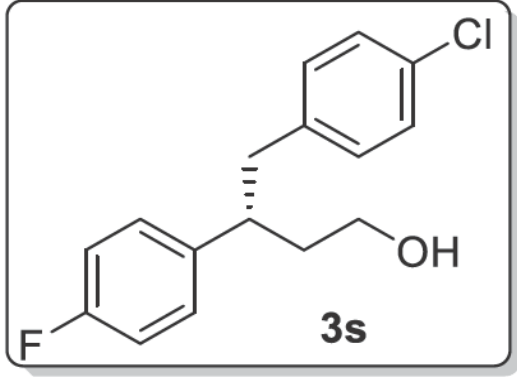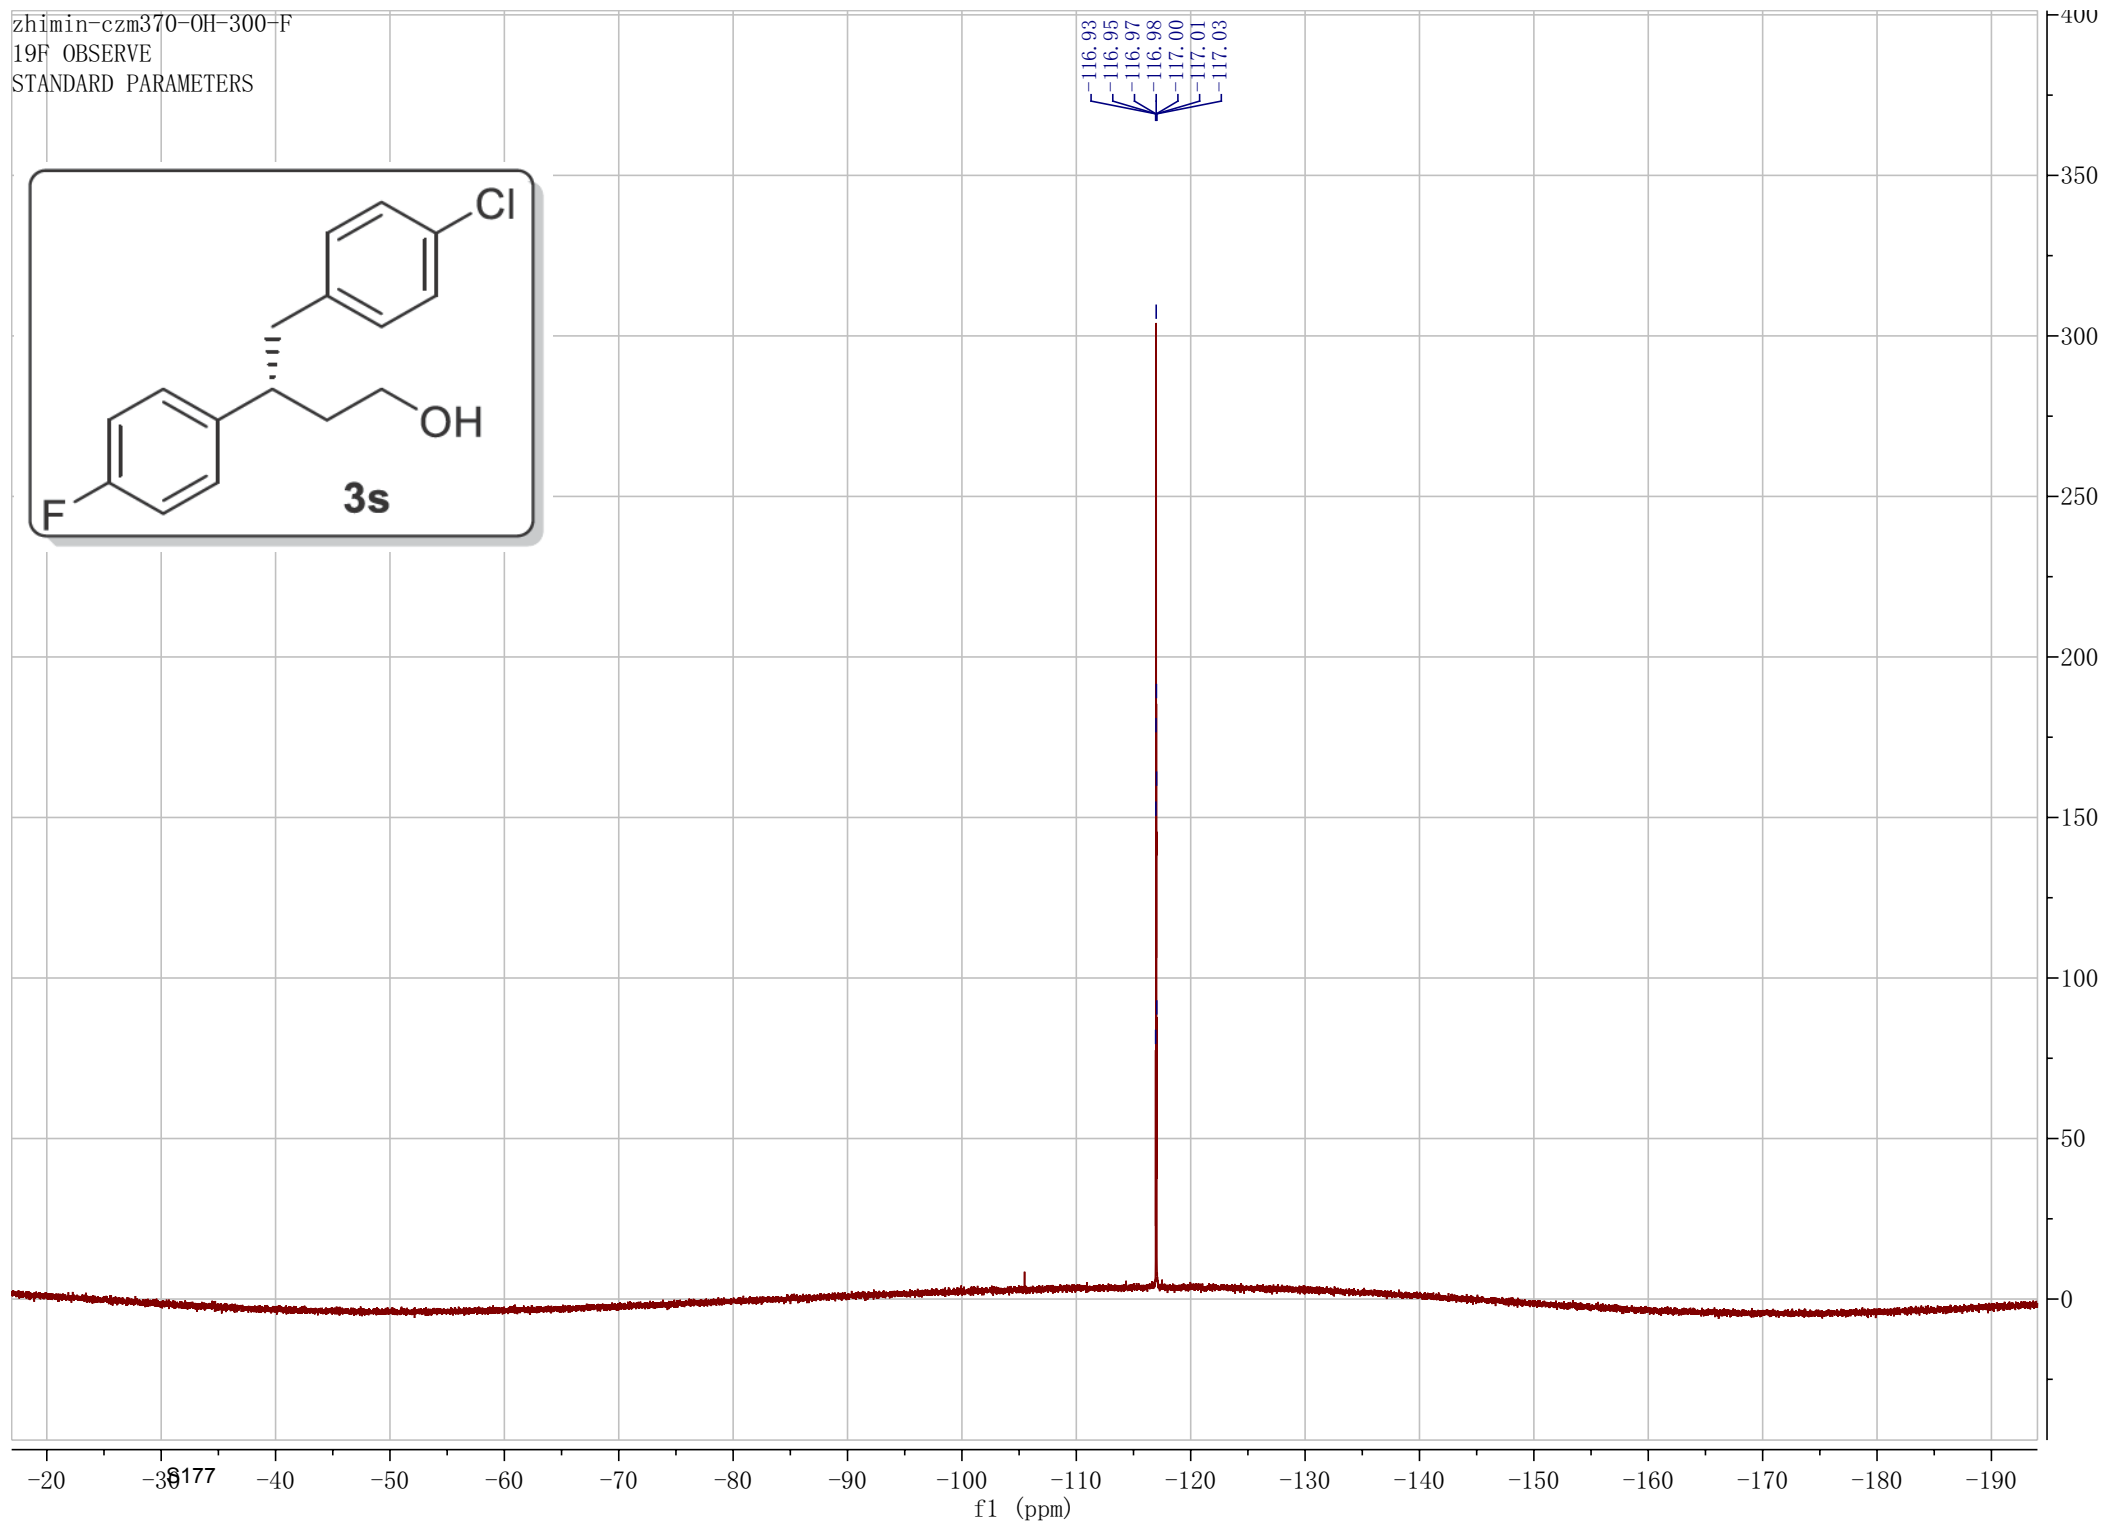

zhimin-czm350-500-H  
STANDARD PROTON PARAMETERS

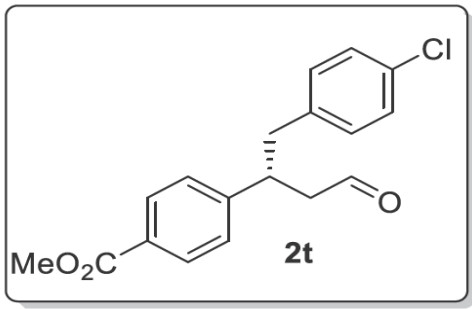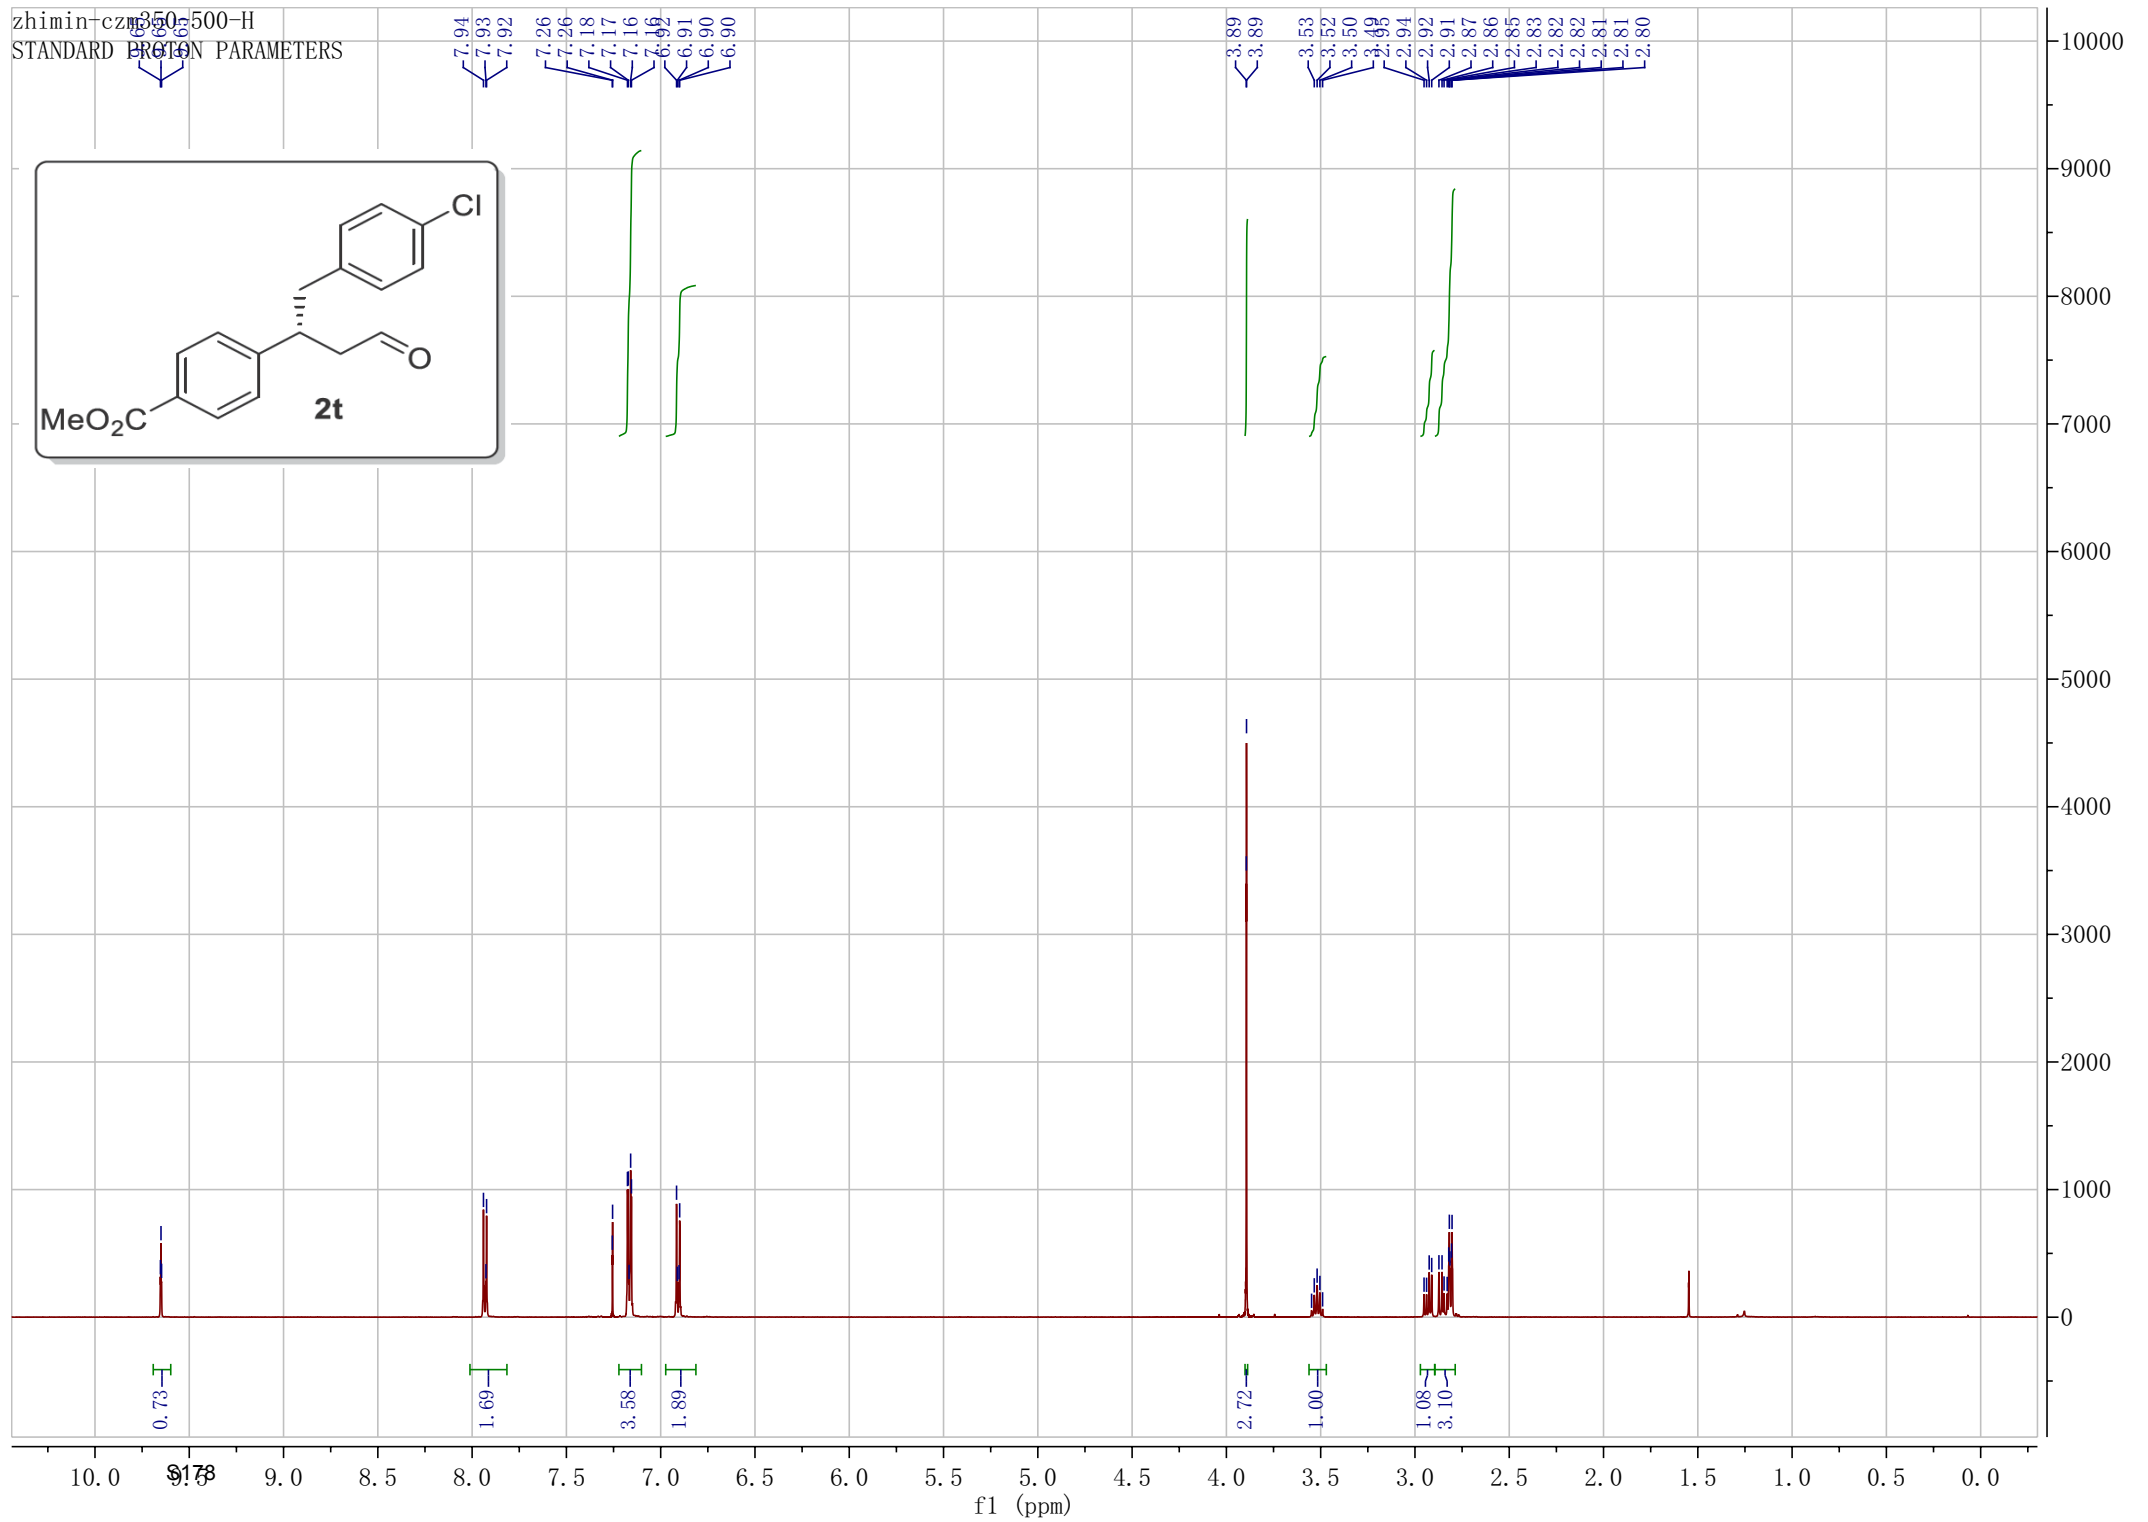



zhimin-czm350-300-C  
13C OBSERVE

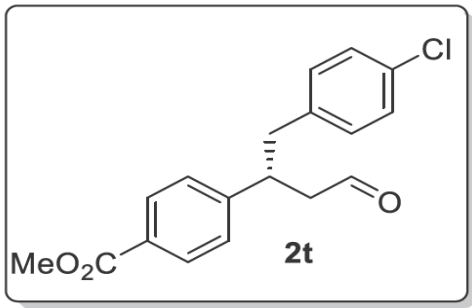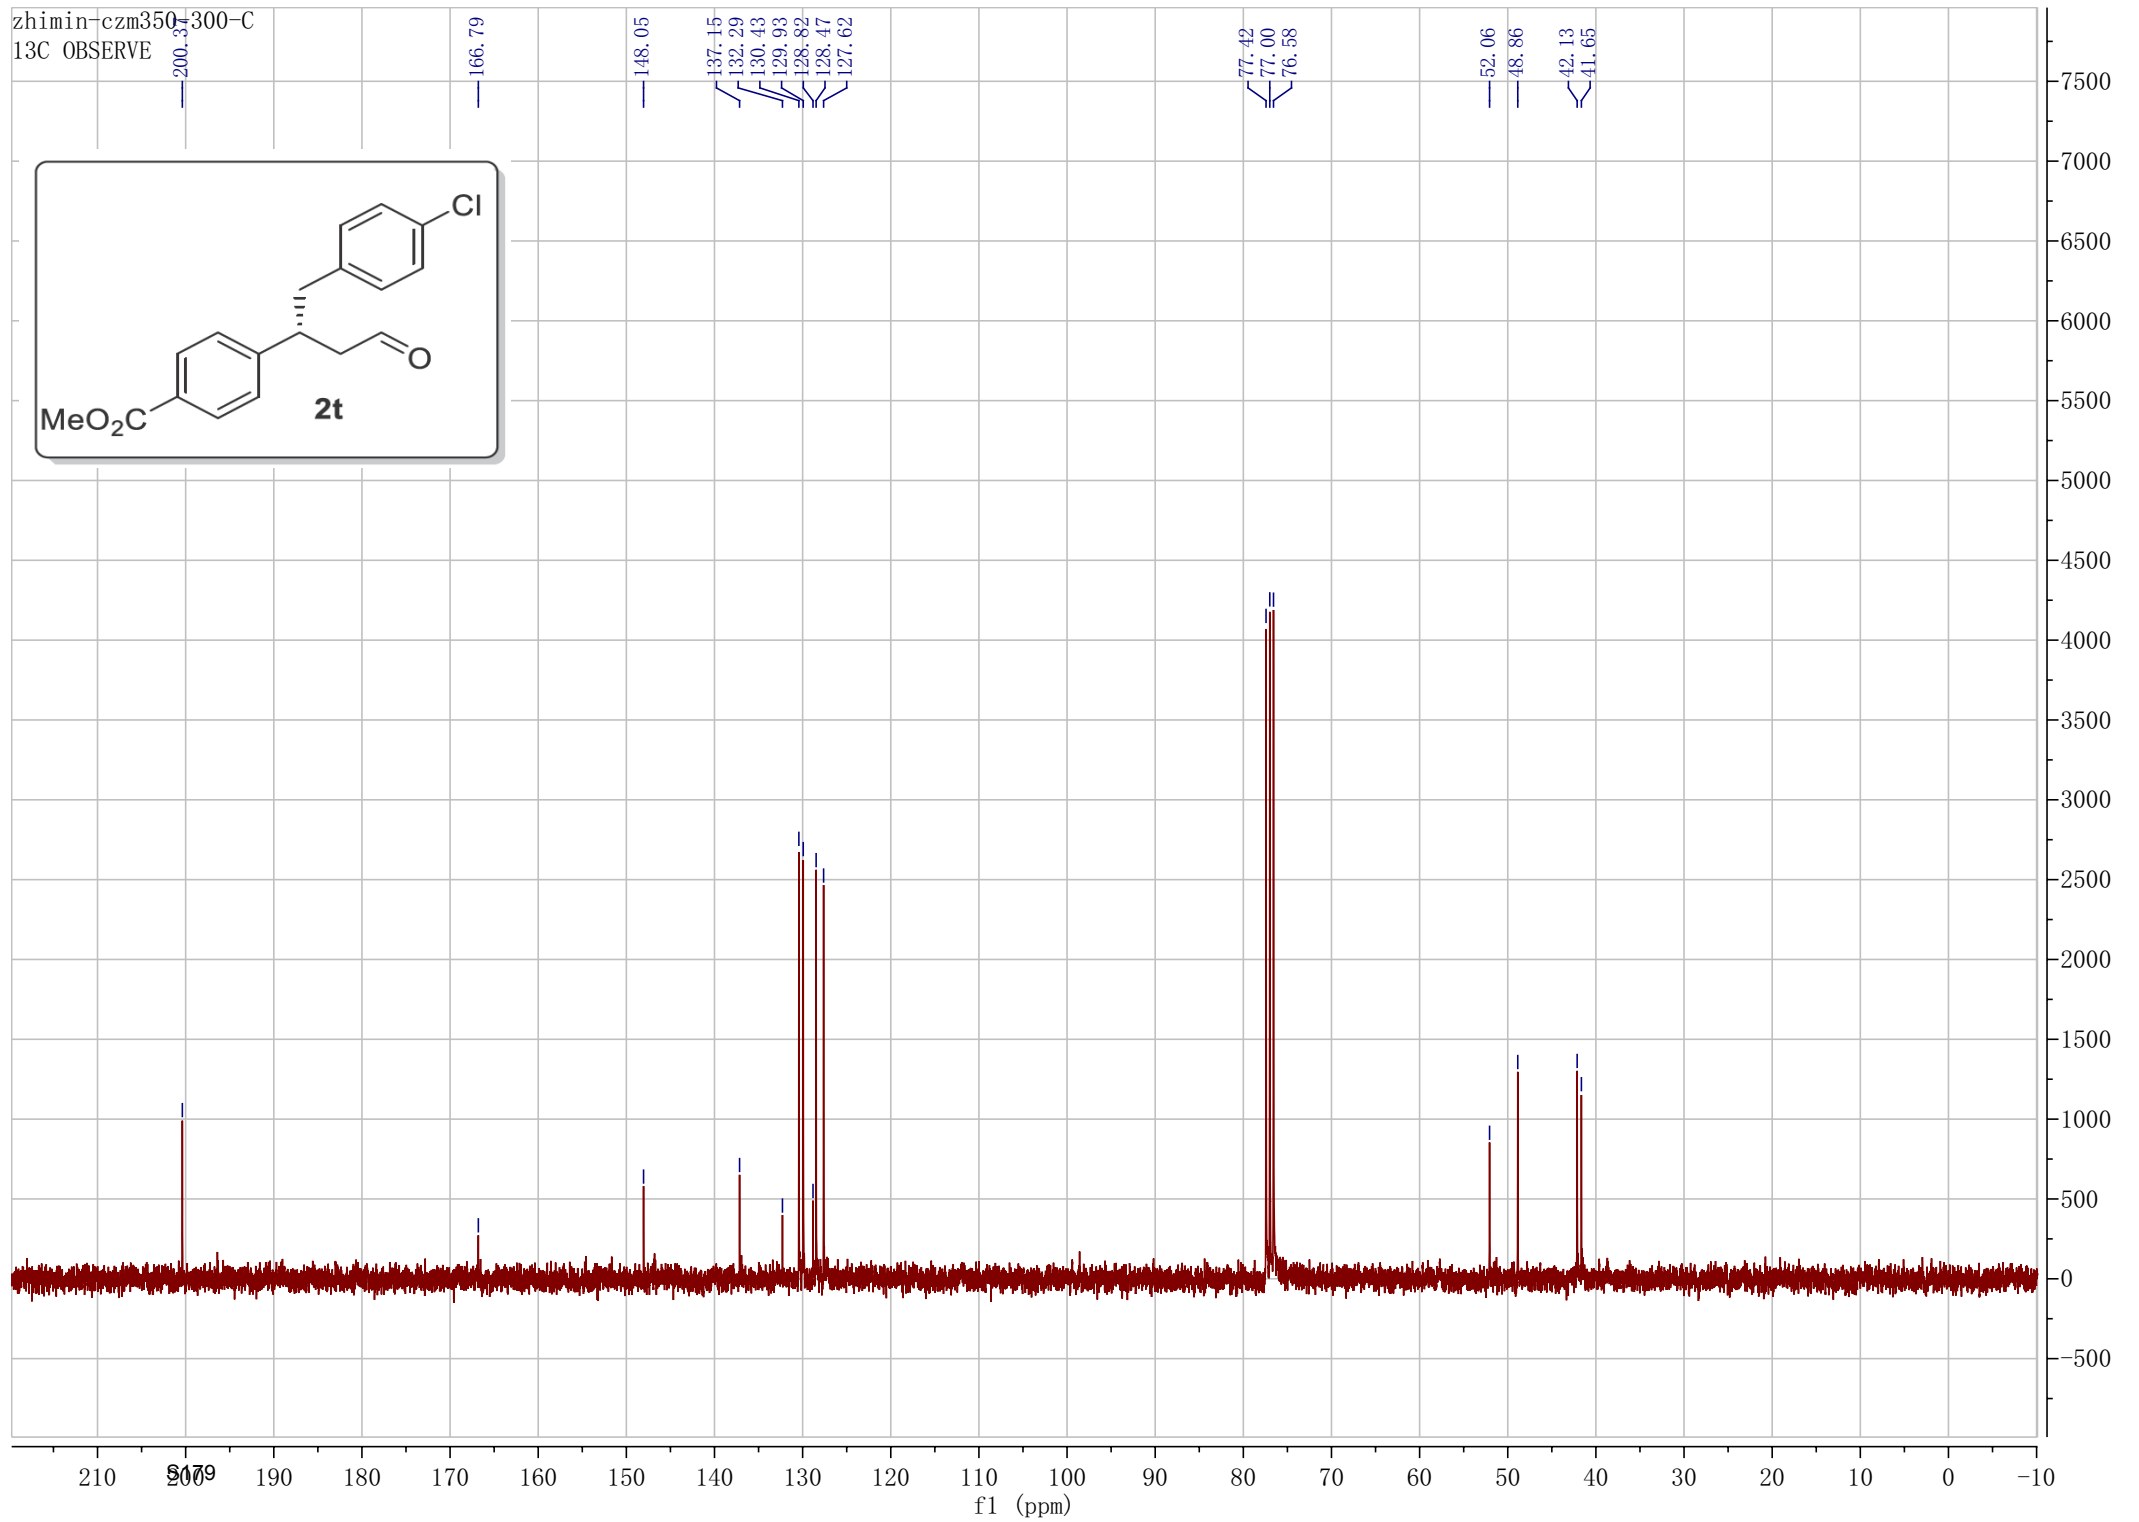

zhimin-czm359-OH-H-500  
STANDARD PROTON PARAMETERS

7.96  
7.93  
7.17  
7.16  
7.15  
7.14  
7.13  
6.91  
6.89

3.89  
3.55  
3.54  
3.53  
3.52  
3.42  
3.40  
2.95  
2.94  
2.92  
2.91  
2.86  
2.84  
2.83  
2.82  
2.01  
2.01  
2.00  
2.00  
1.99  
1.98  
1.91  
1.90  
1.89  
1.89  
1.19  
1.19

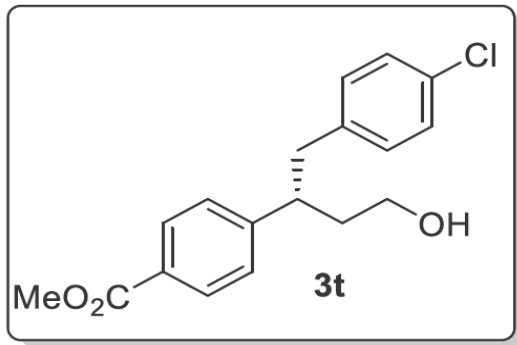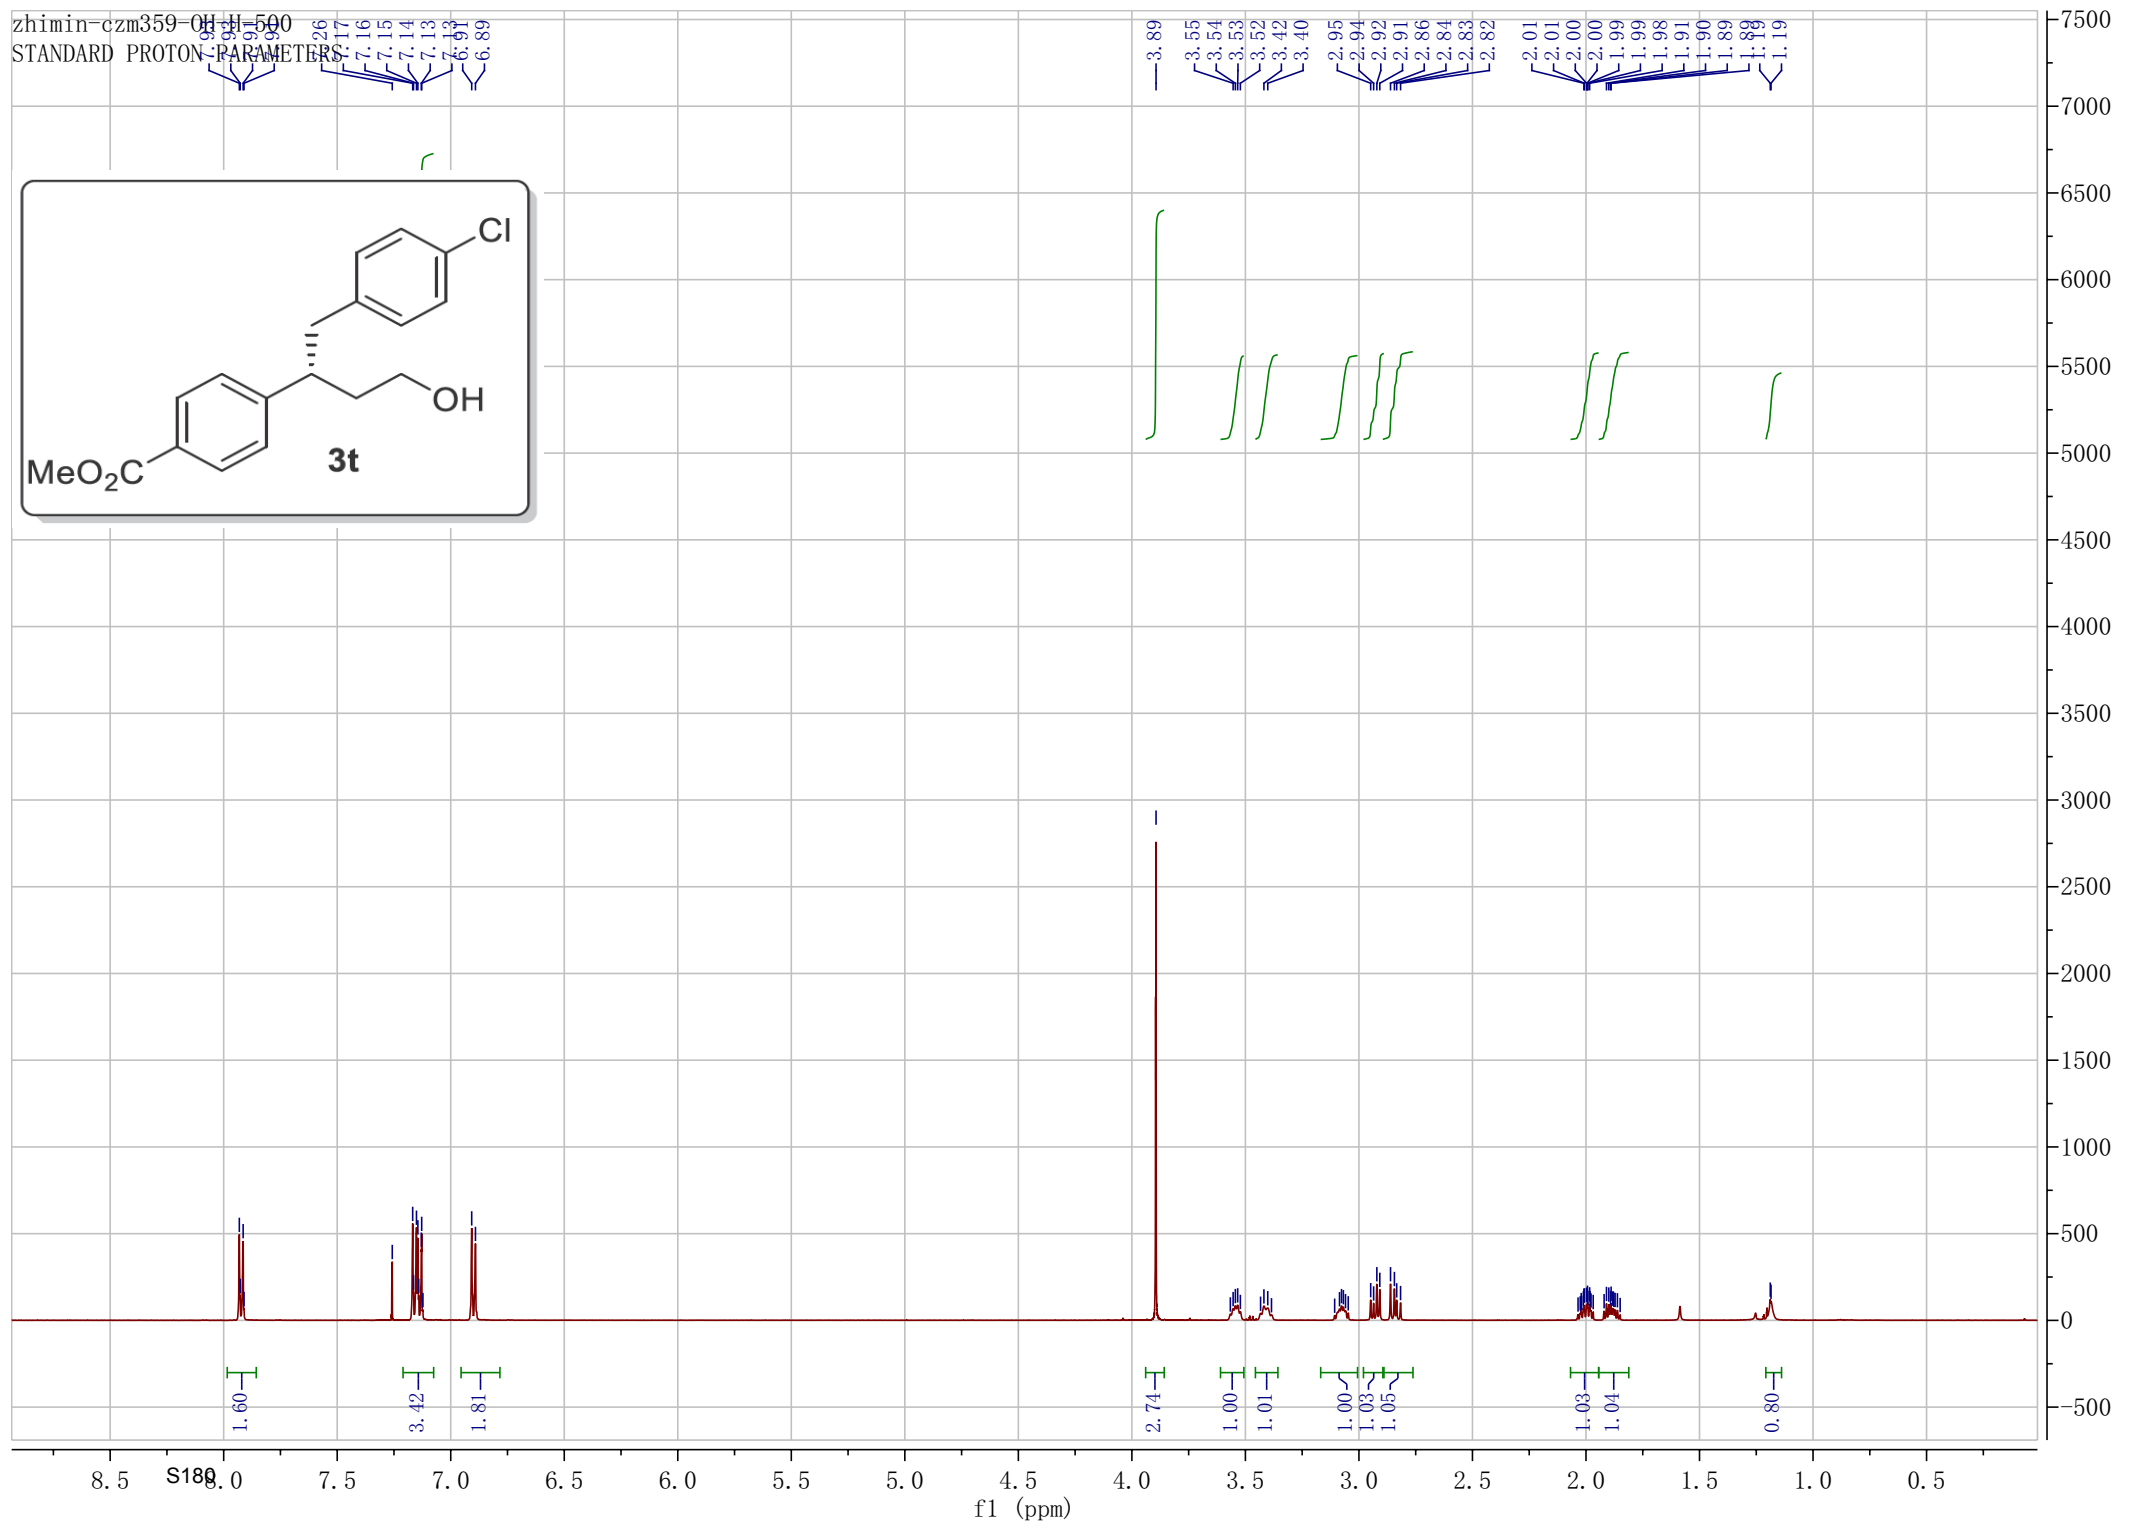

zhimin-czm359-OH-300-C  
13C OBSERVE

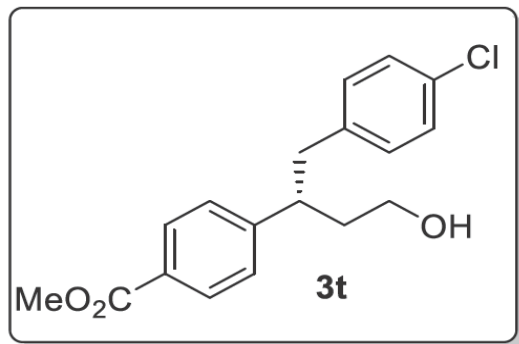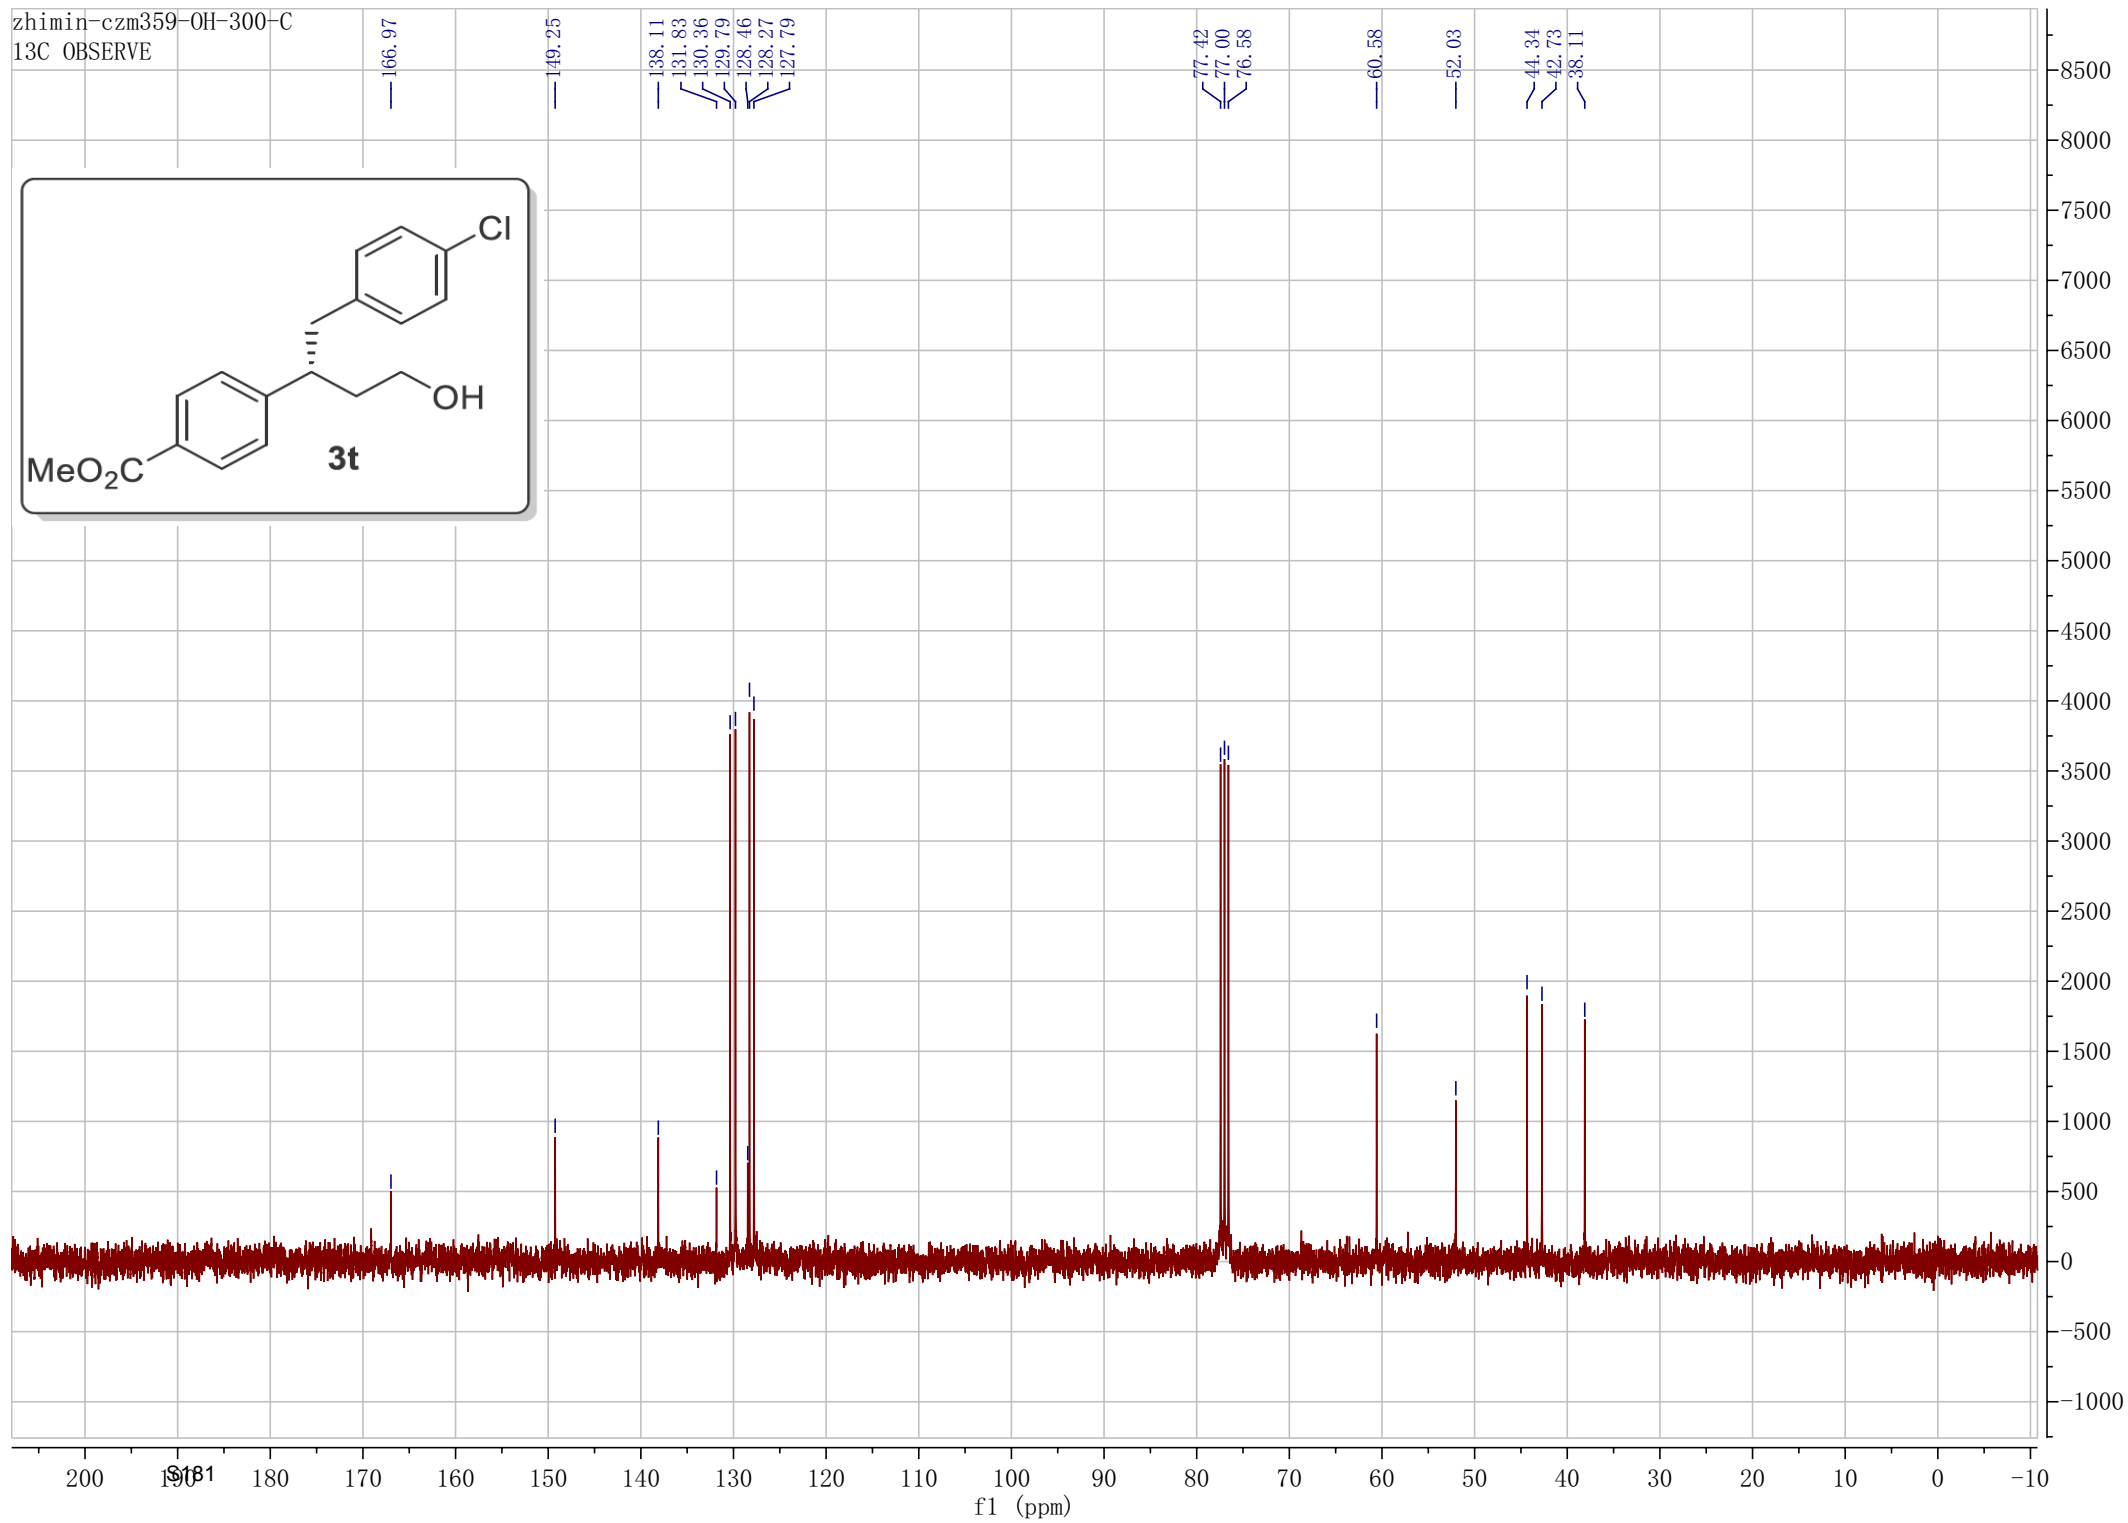

zhimin-czm332-CH<sub>2</sub>-H  
STANDARD PROTON PARAMETERS

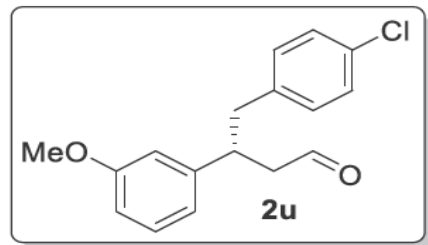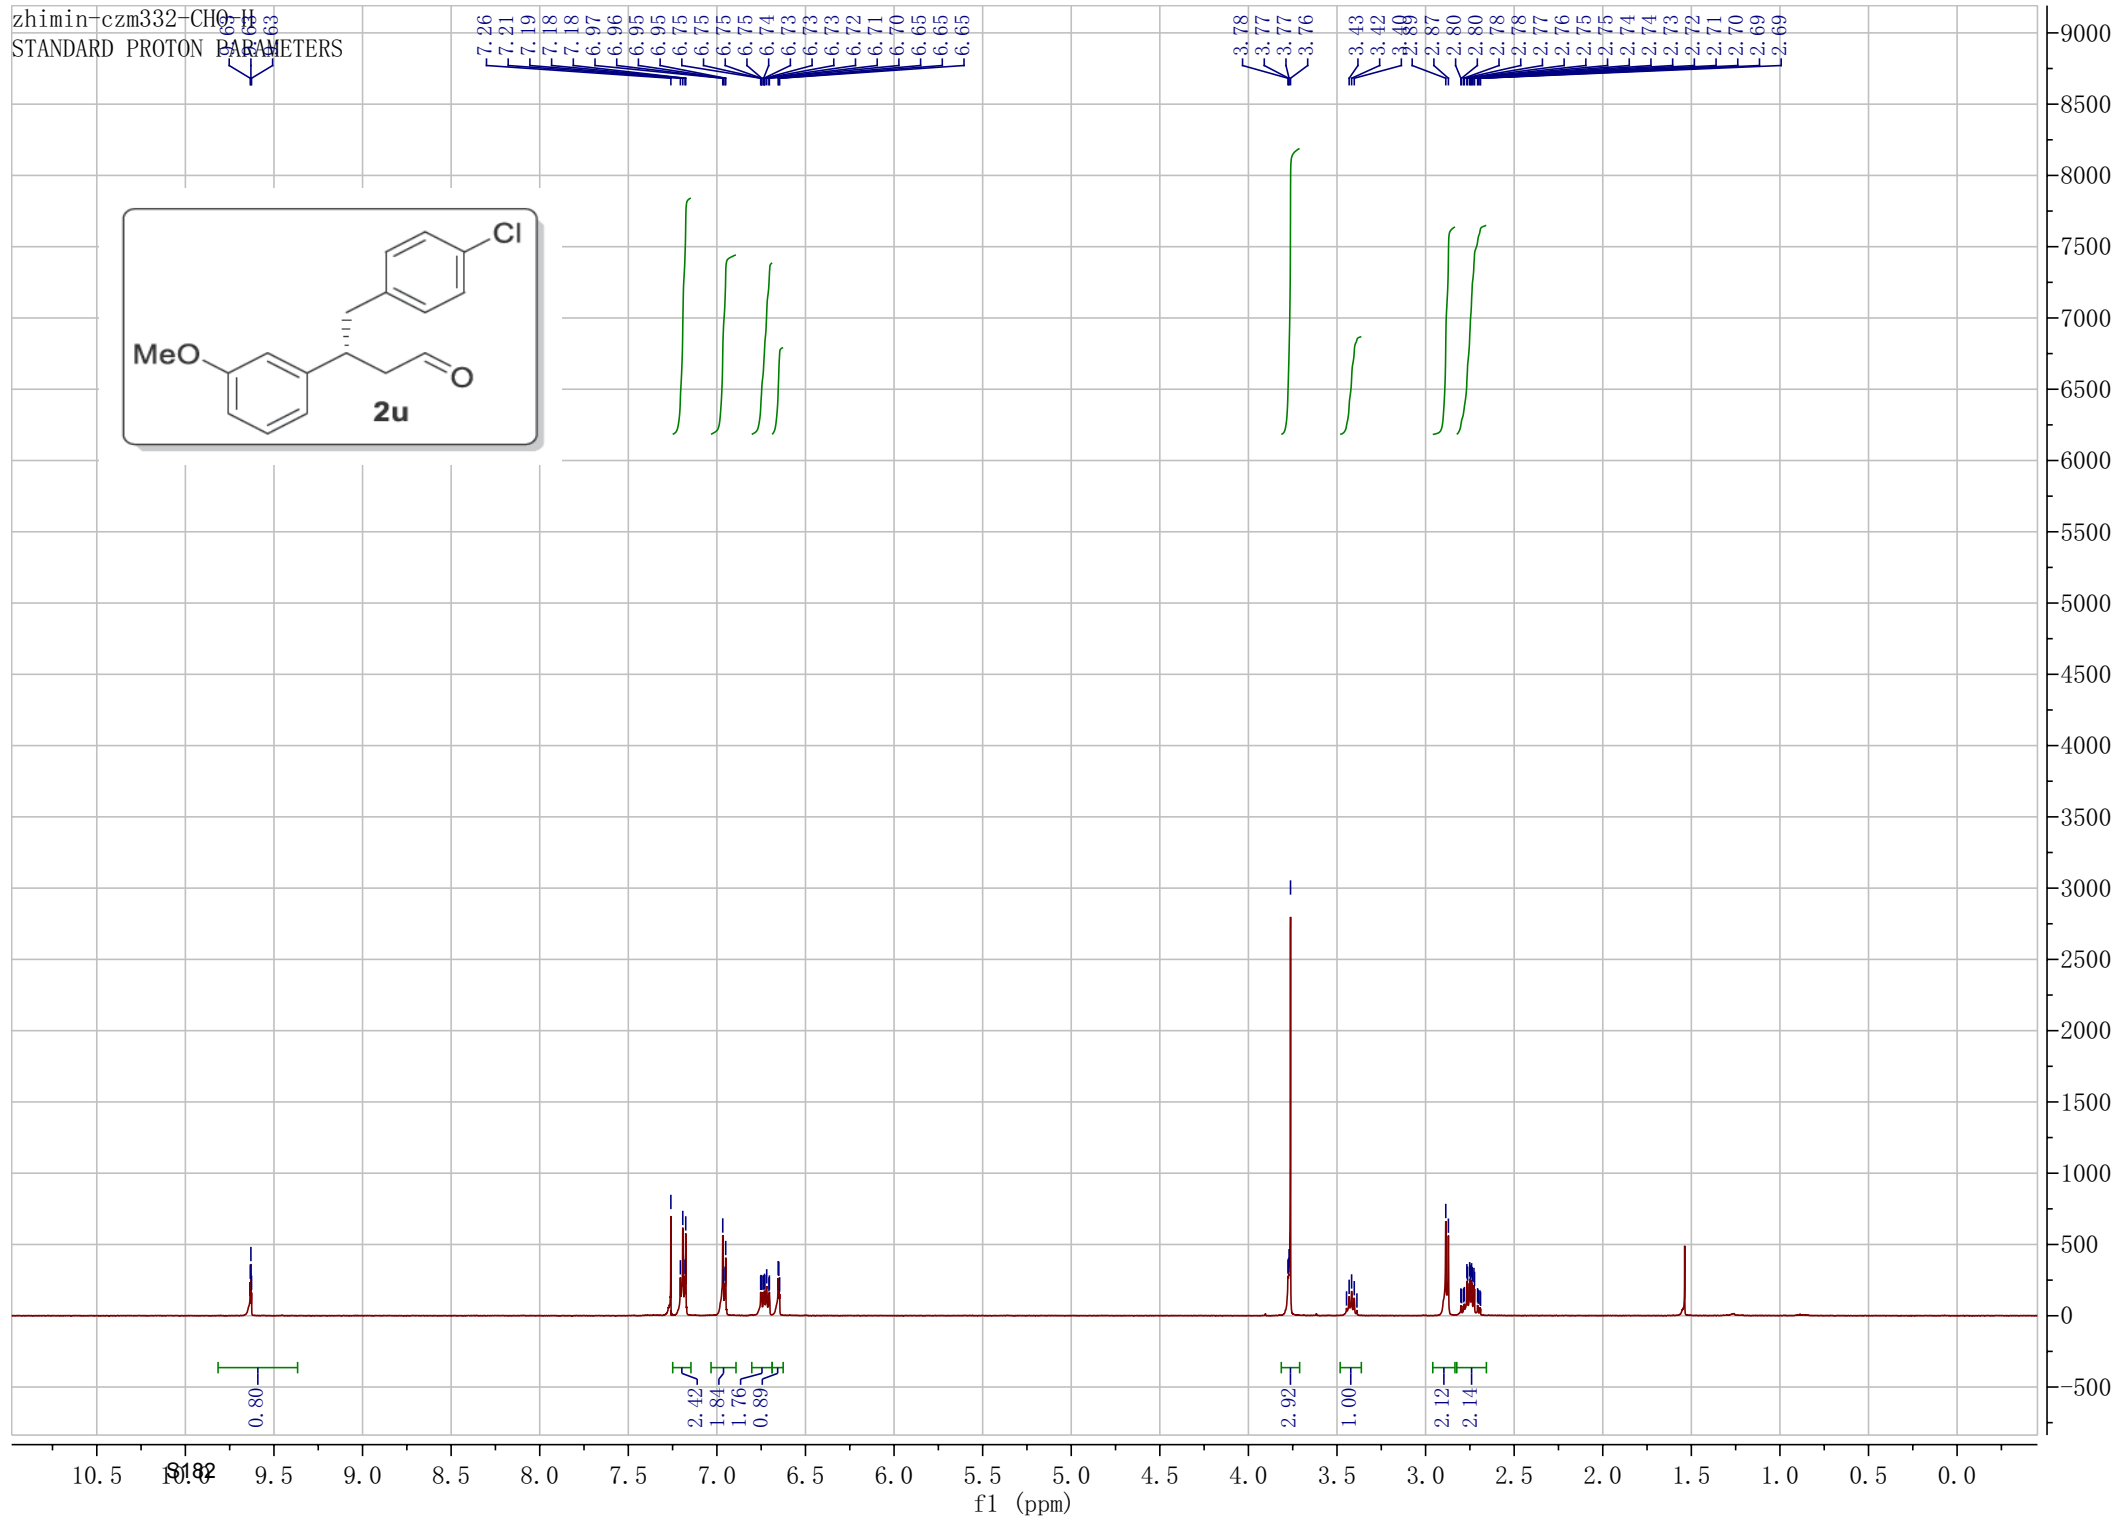

zhimin-czm277-CHO-C  
STANDARD CARBON PARAMETERS

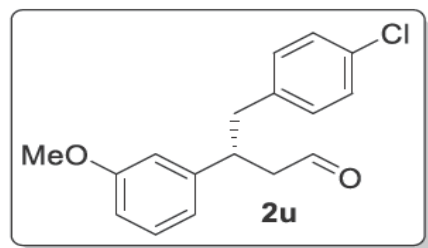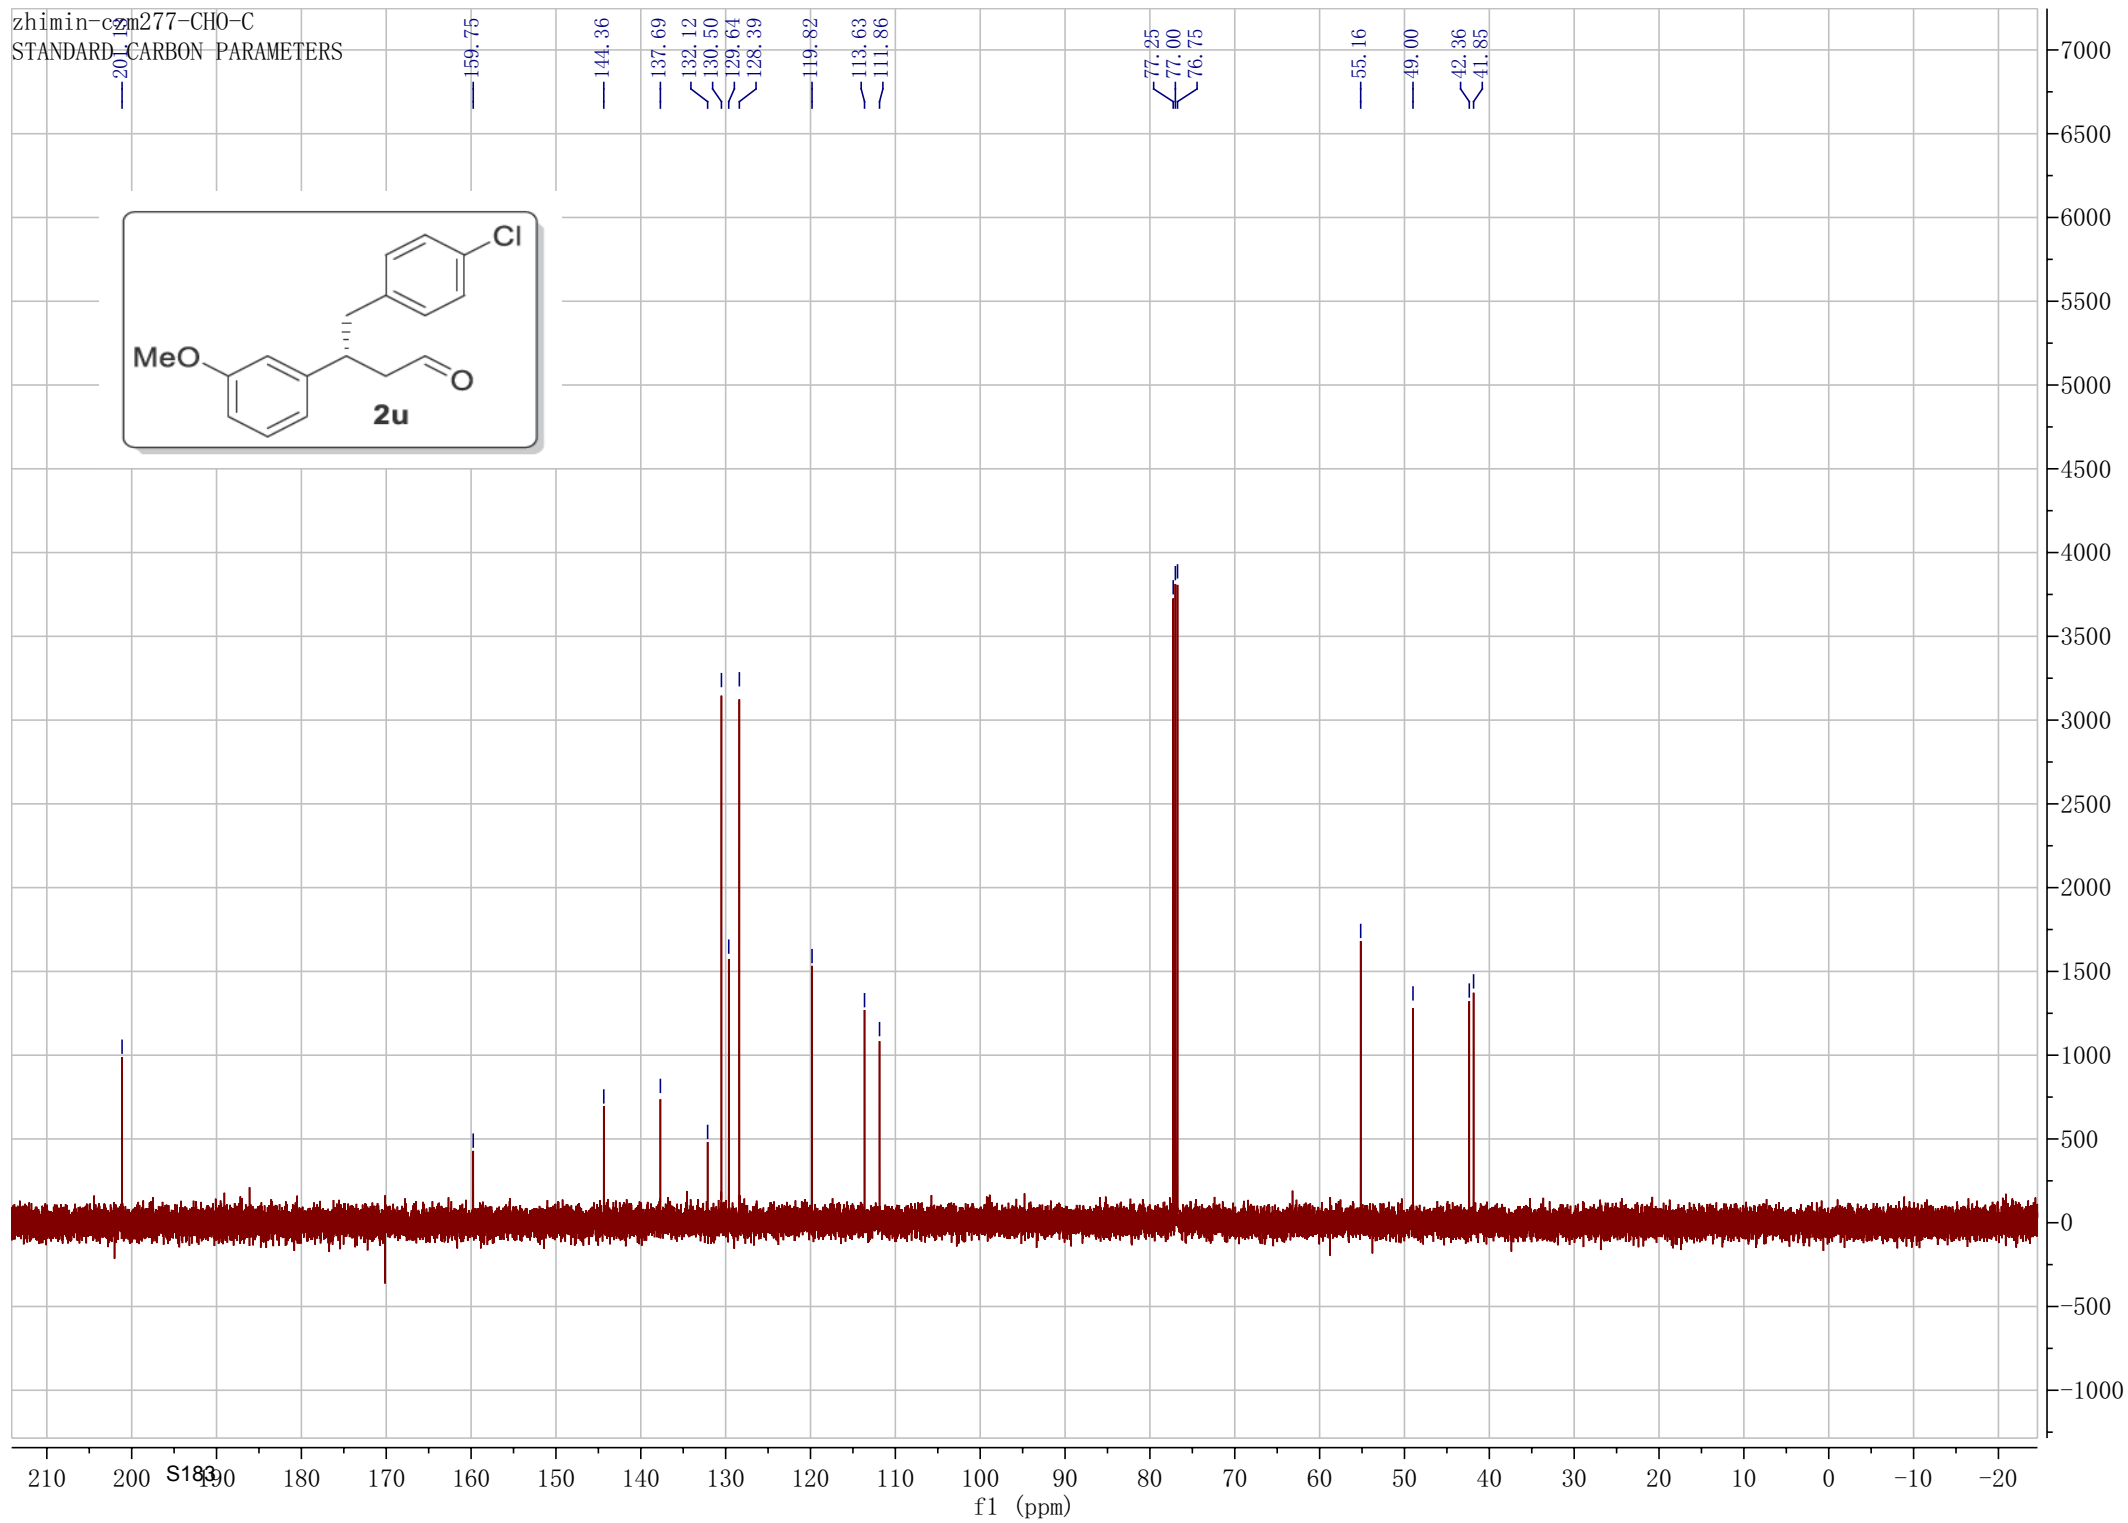

zhimin-czm332-OH-300-H  
UofUtah Unity300 NMR  
STANDARD 1H OBSERVE

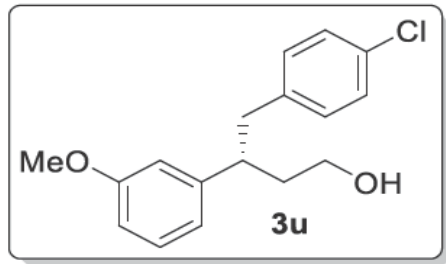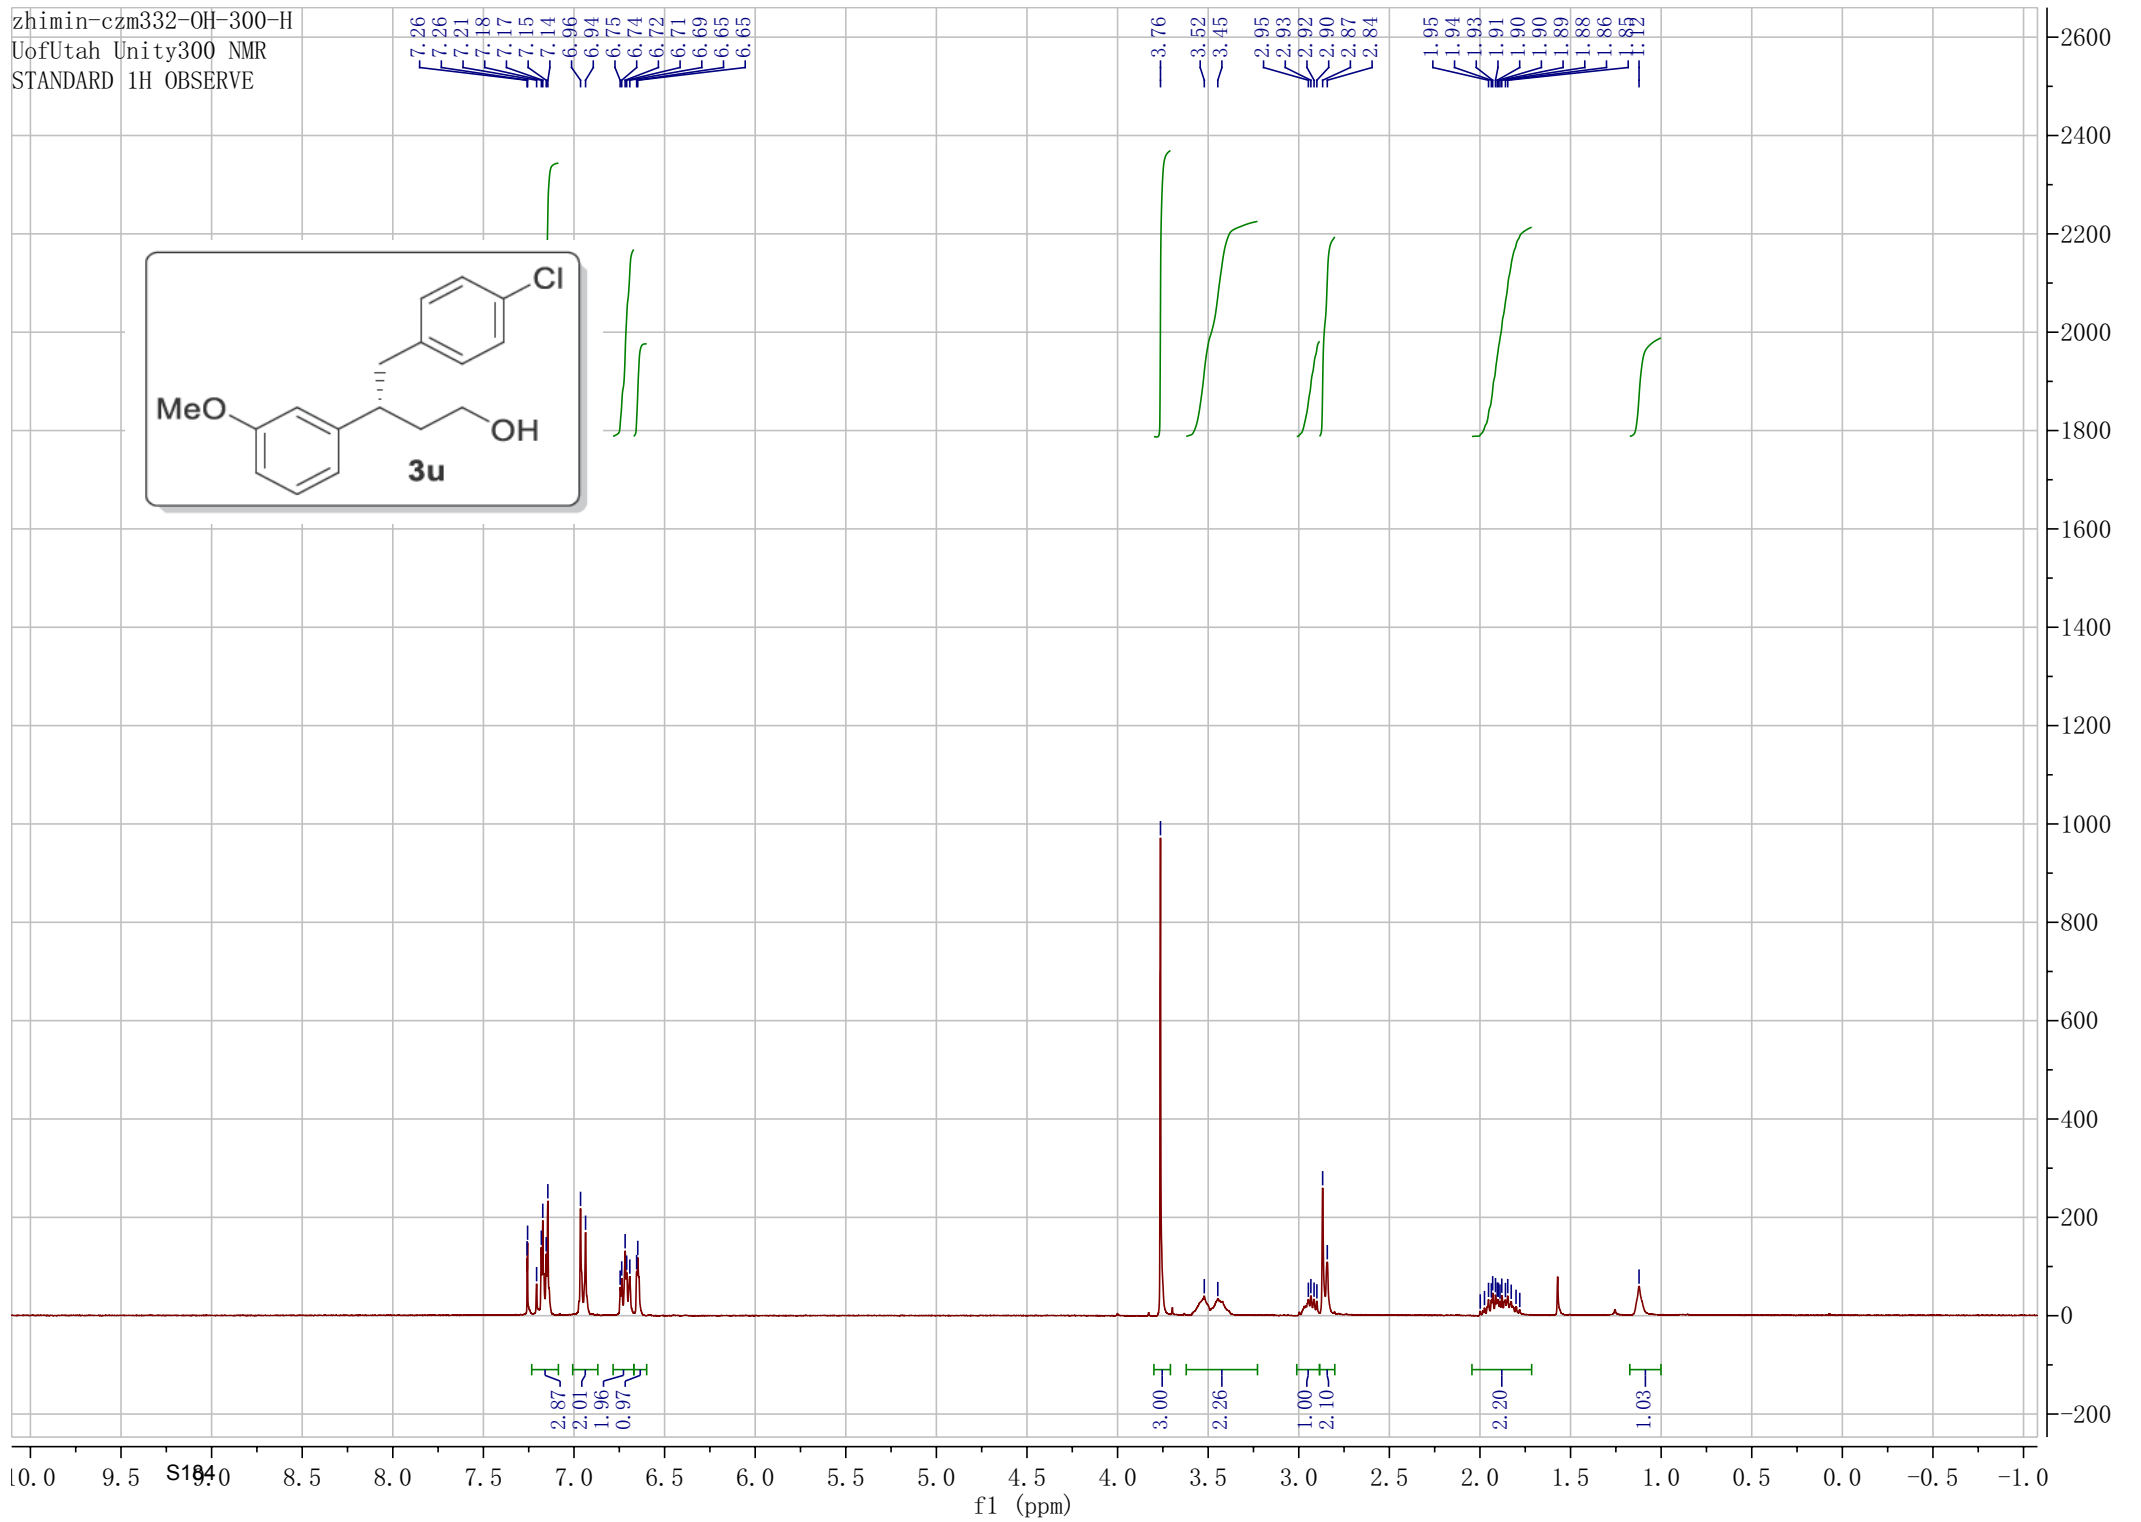

zhimin-czm332-OH-300-C  
13C OBSERVE

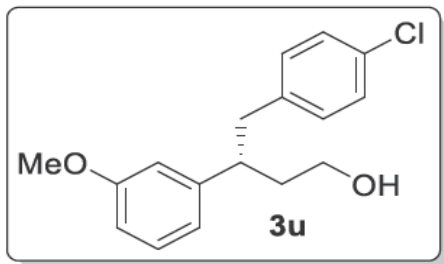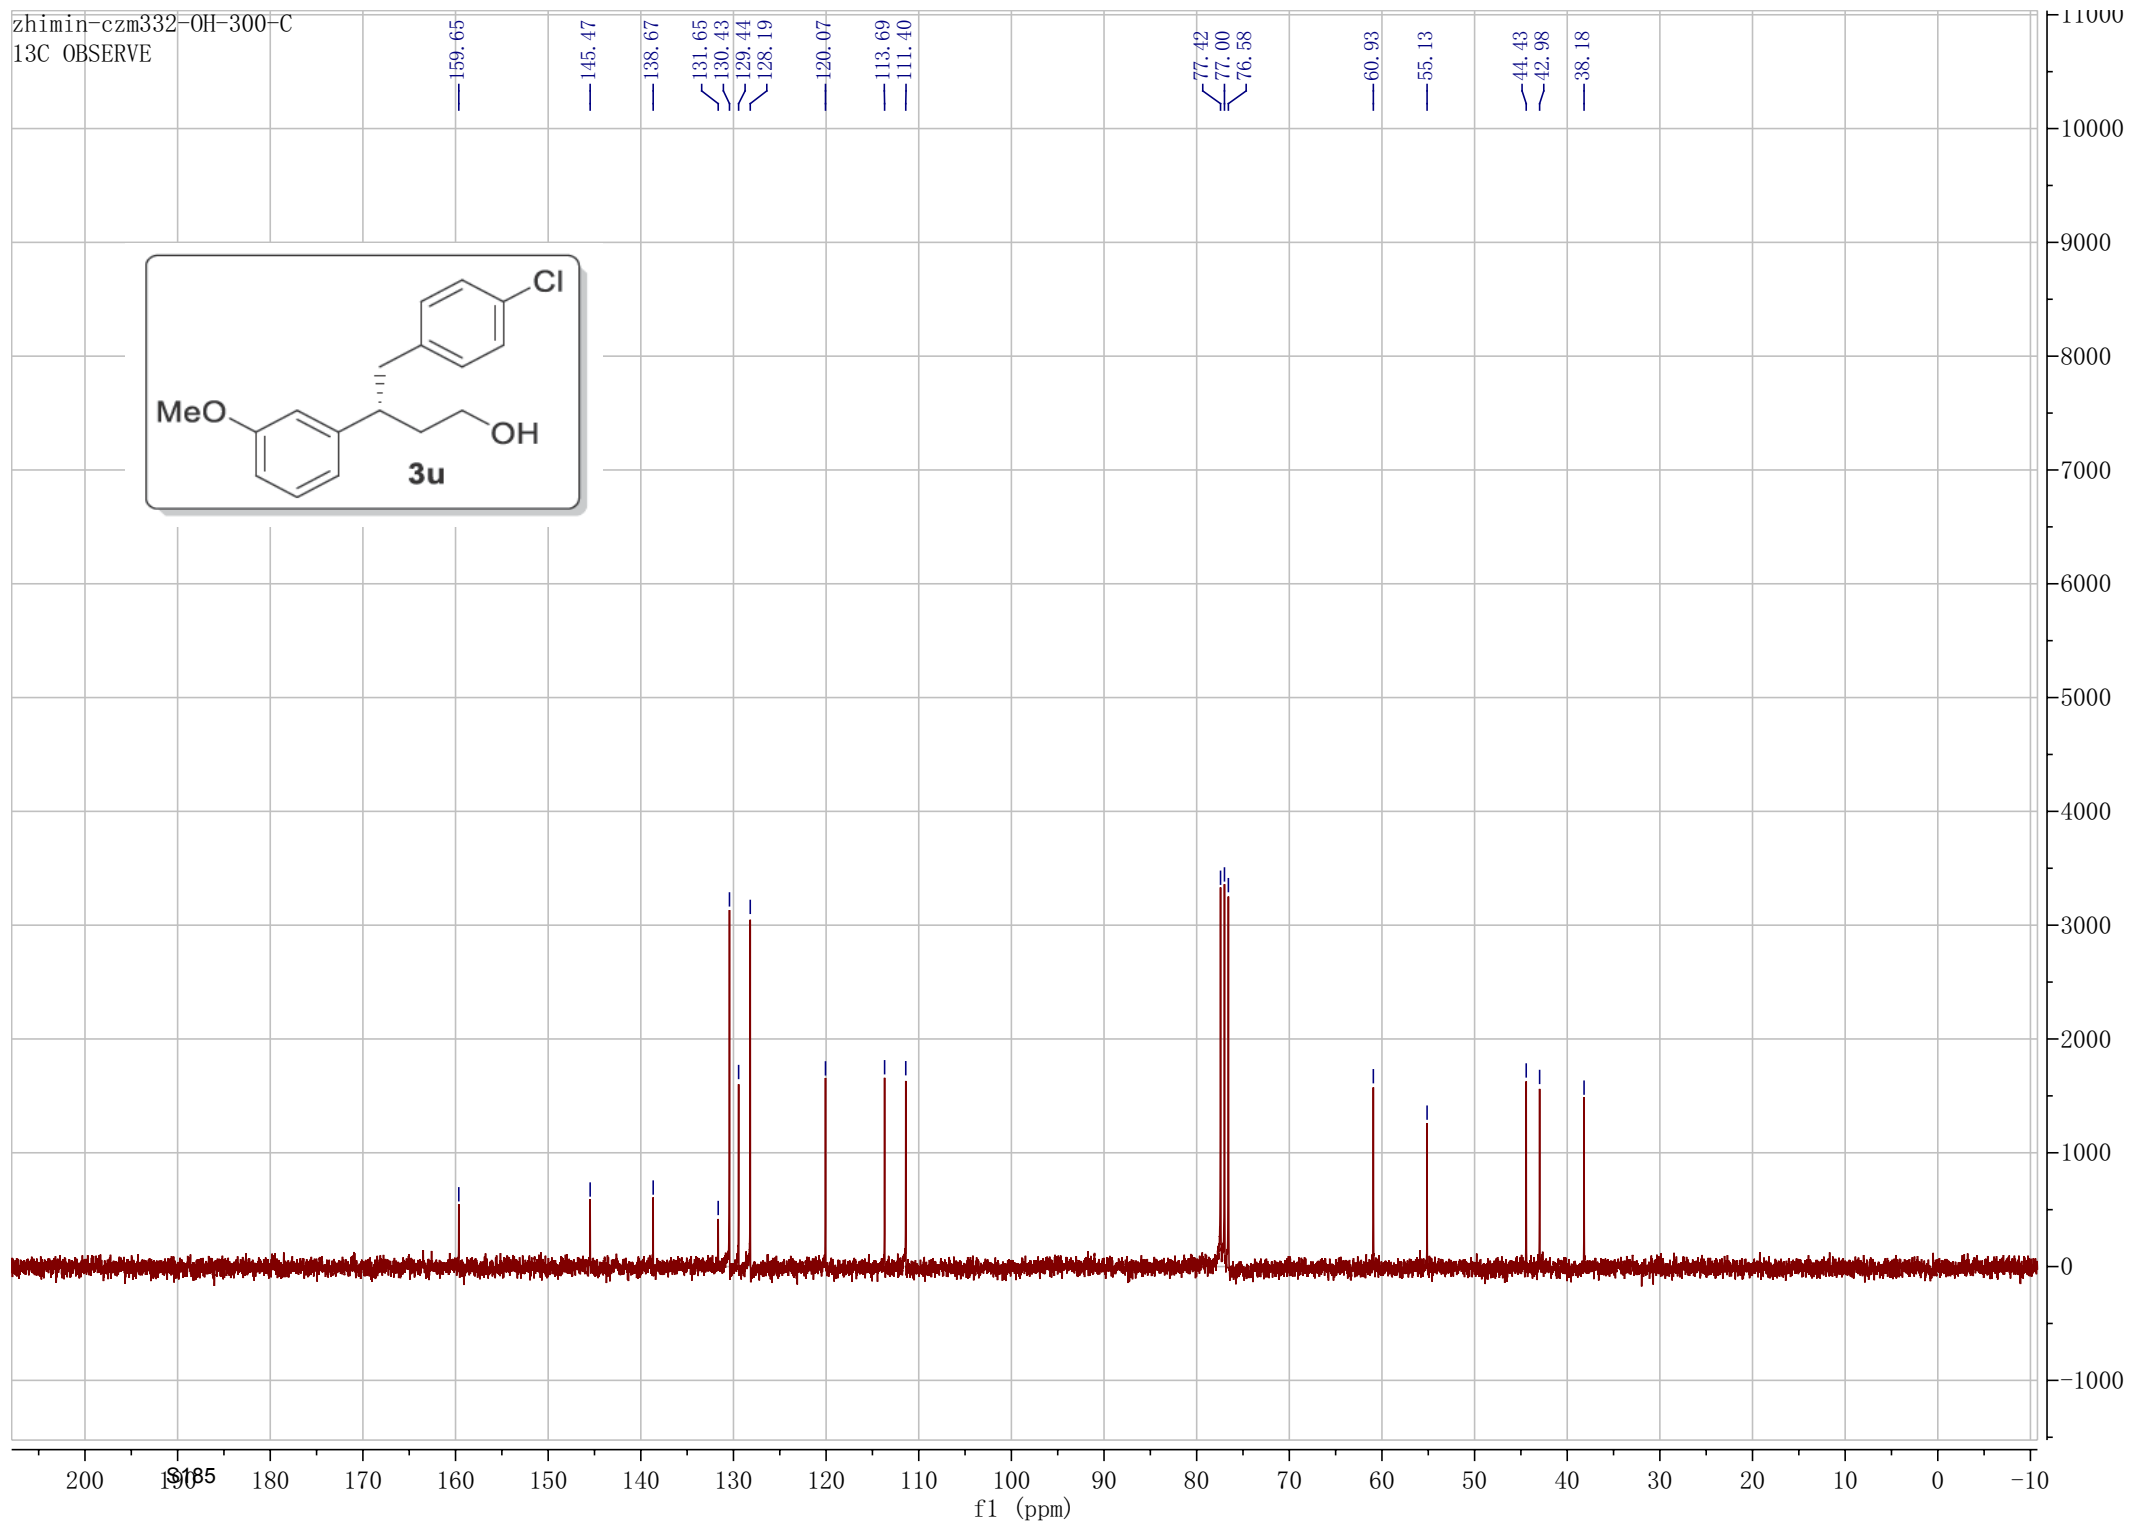

zhimin-czm428-CHQ-300-H  
UofUtah Unity300-NMR  
STANDARD 1H OBSERVE

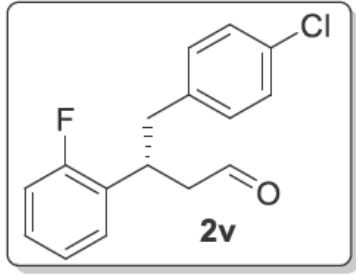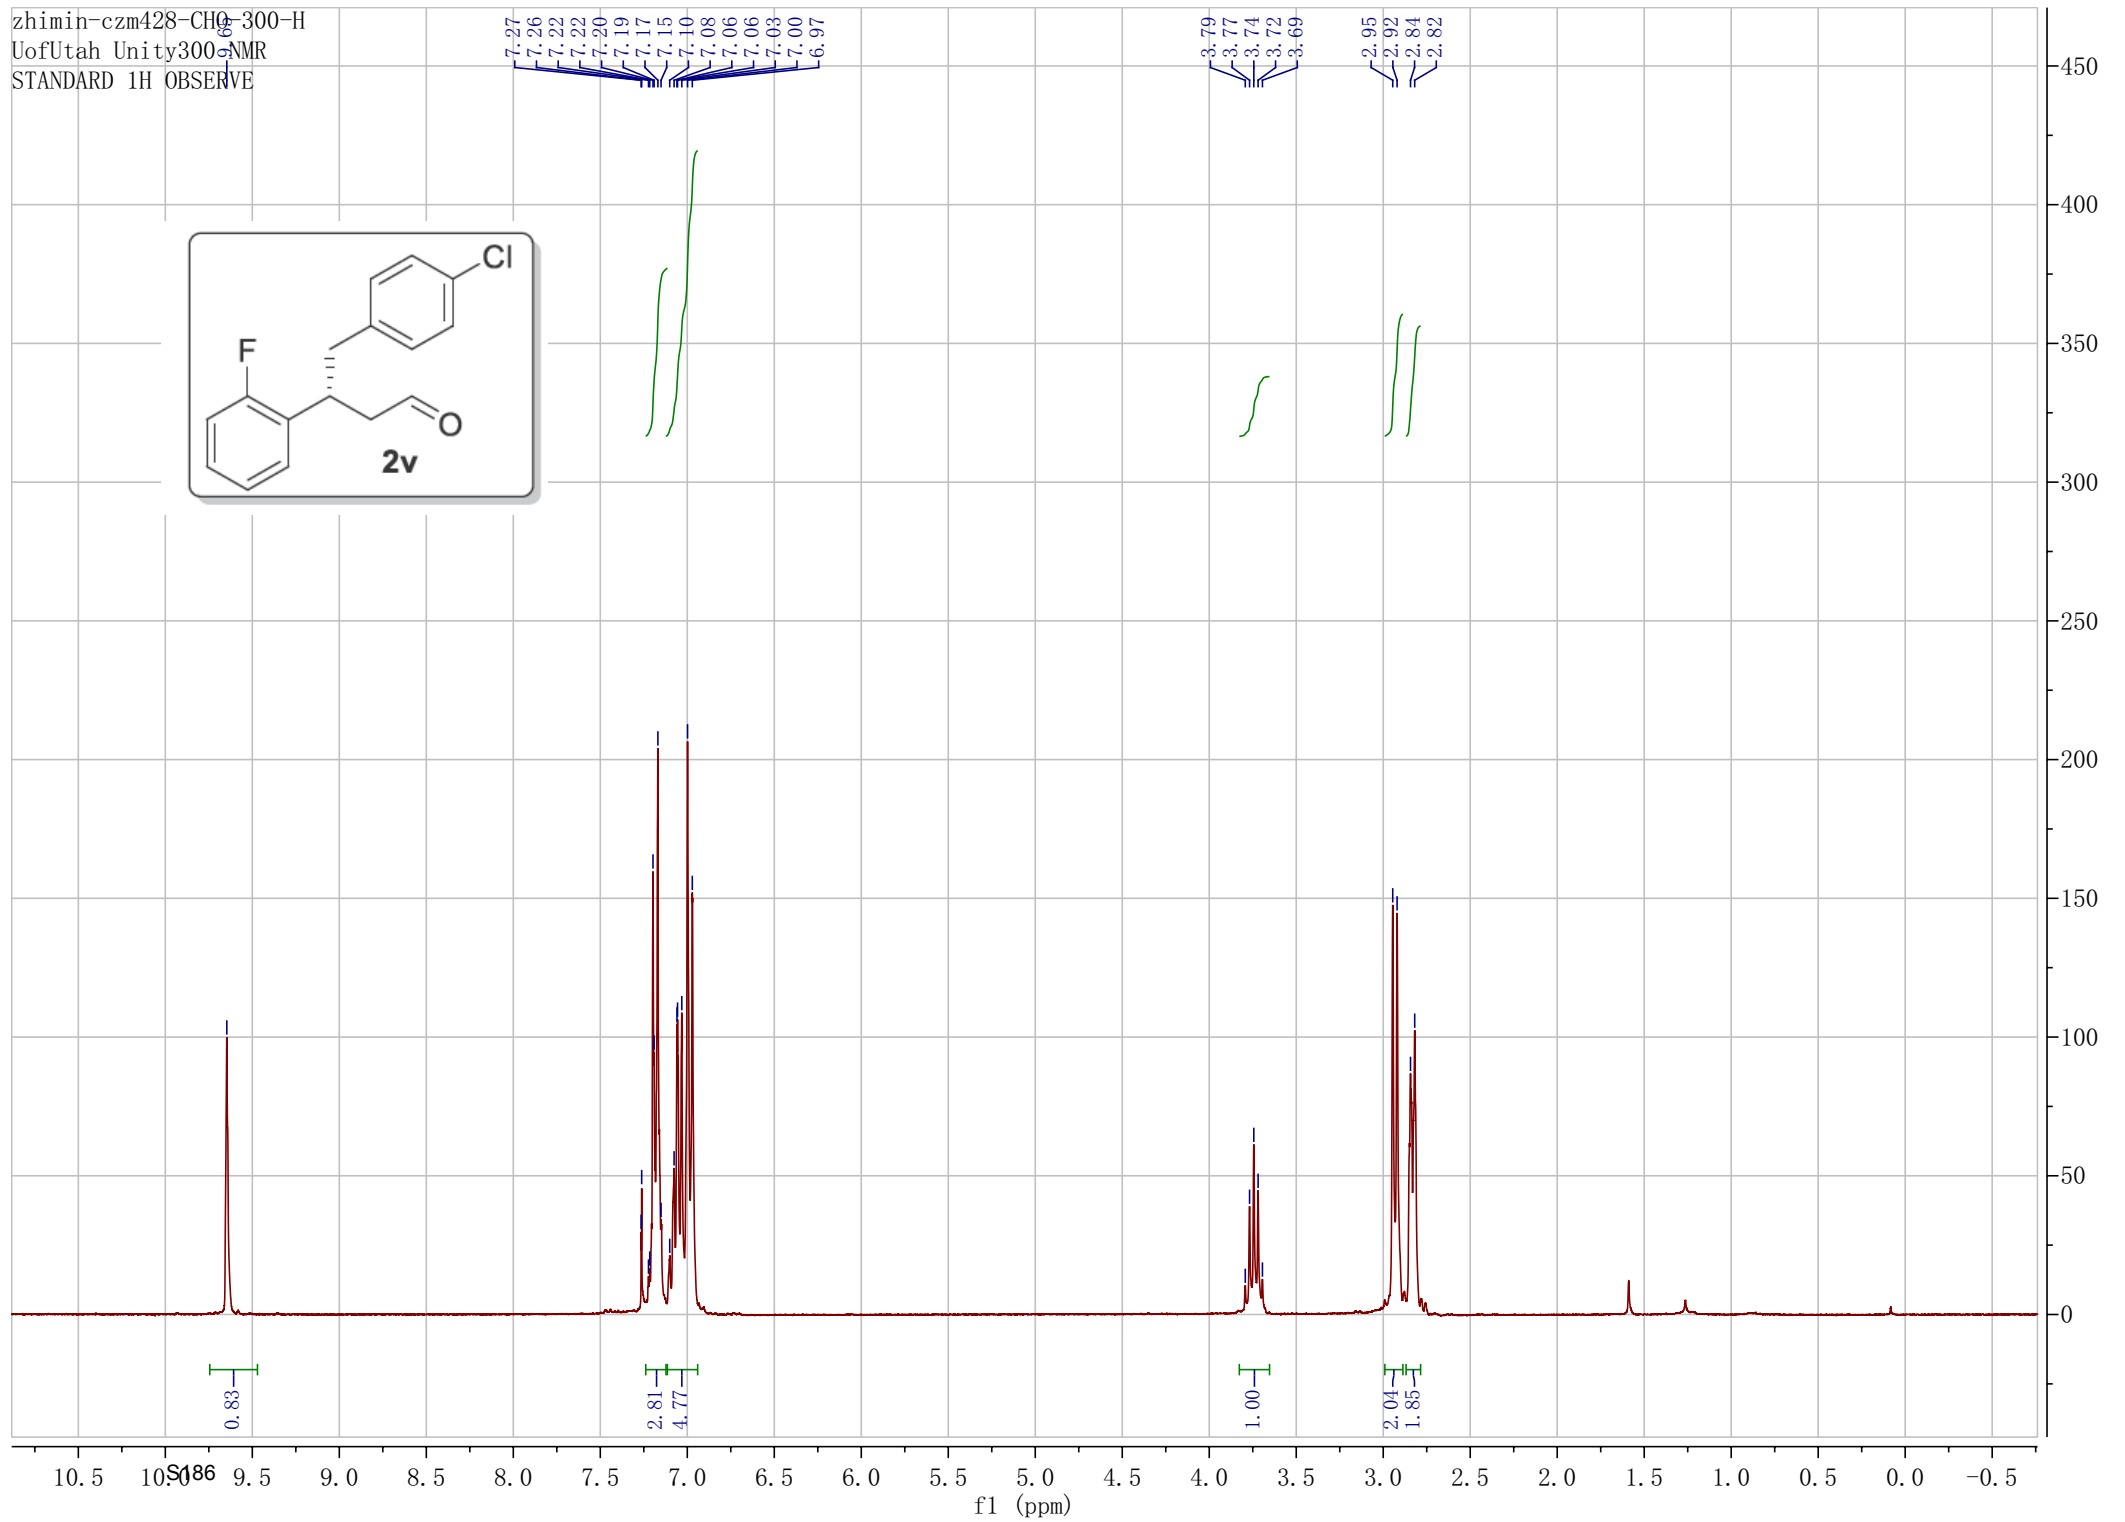



zhimin-czm428-CHO-300-C  
13C OBSERVE

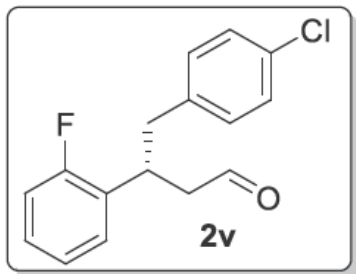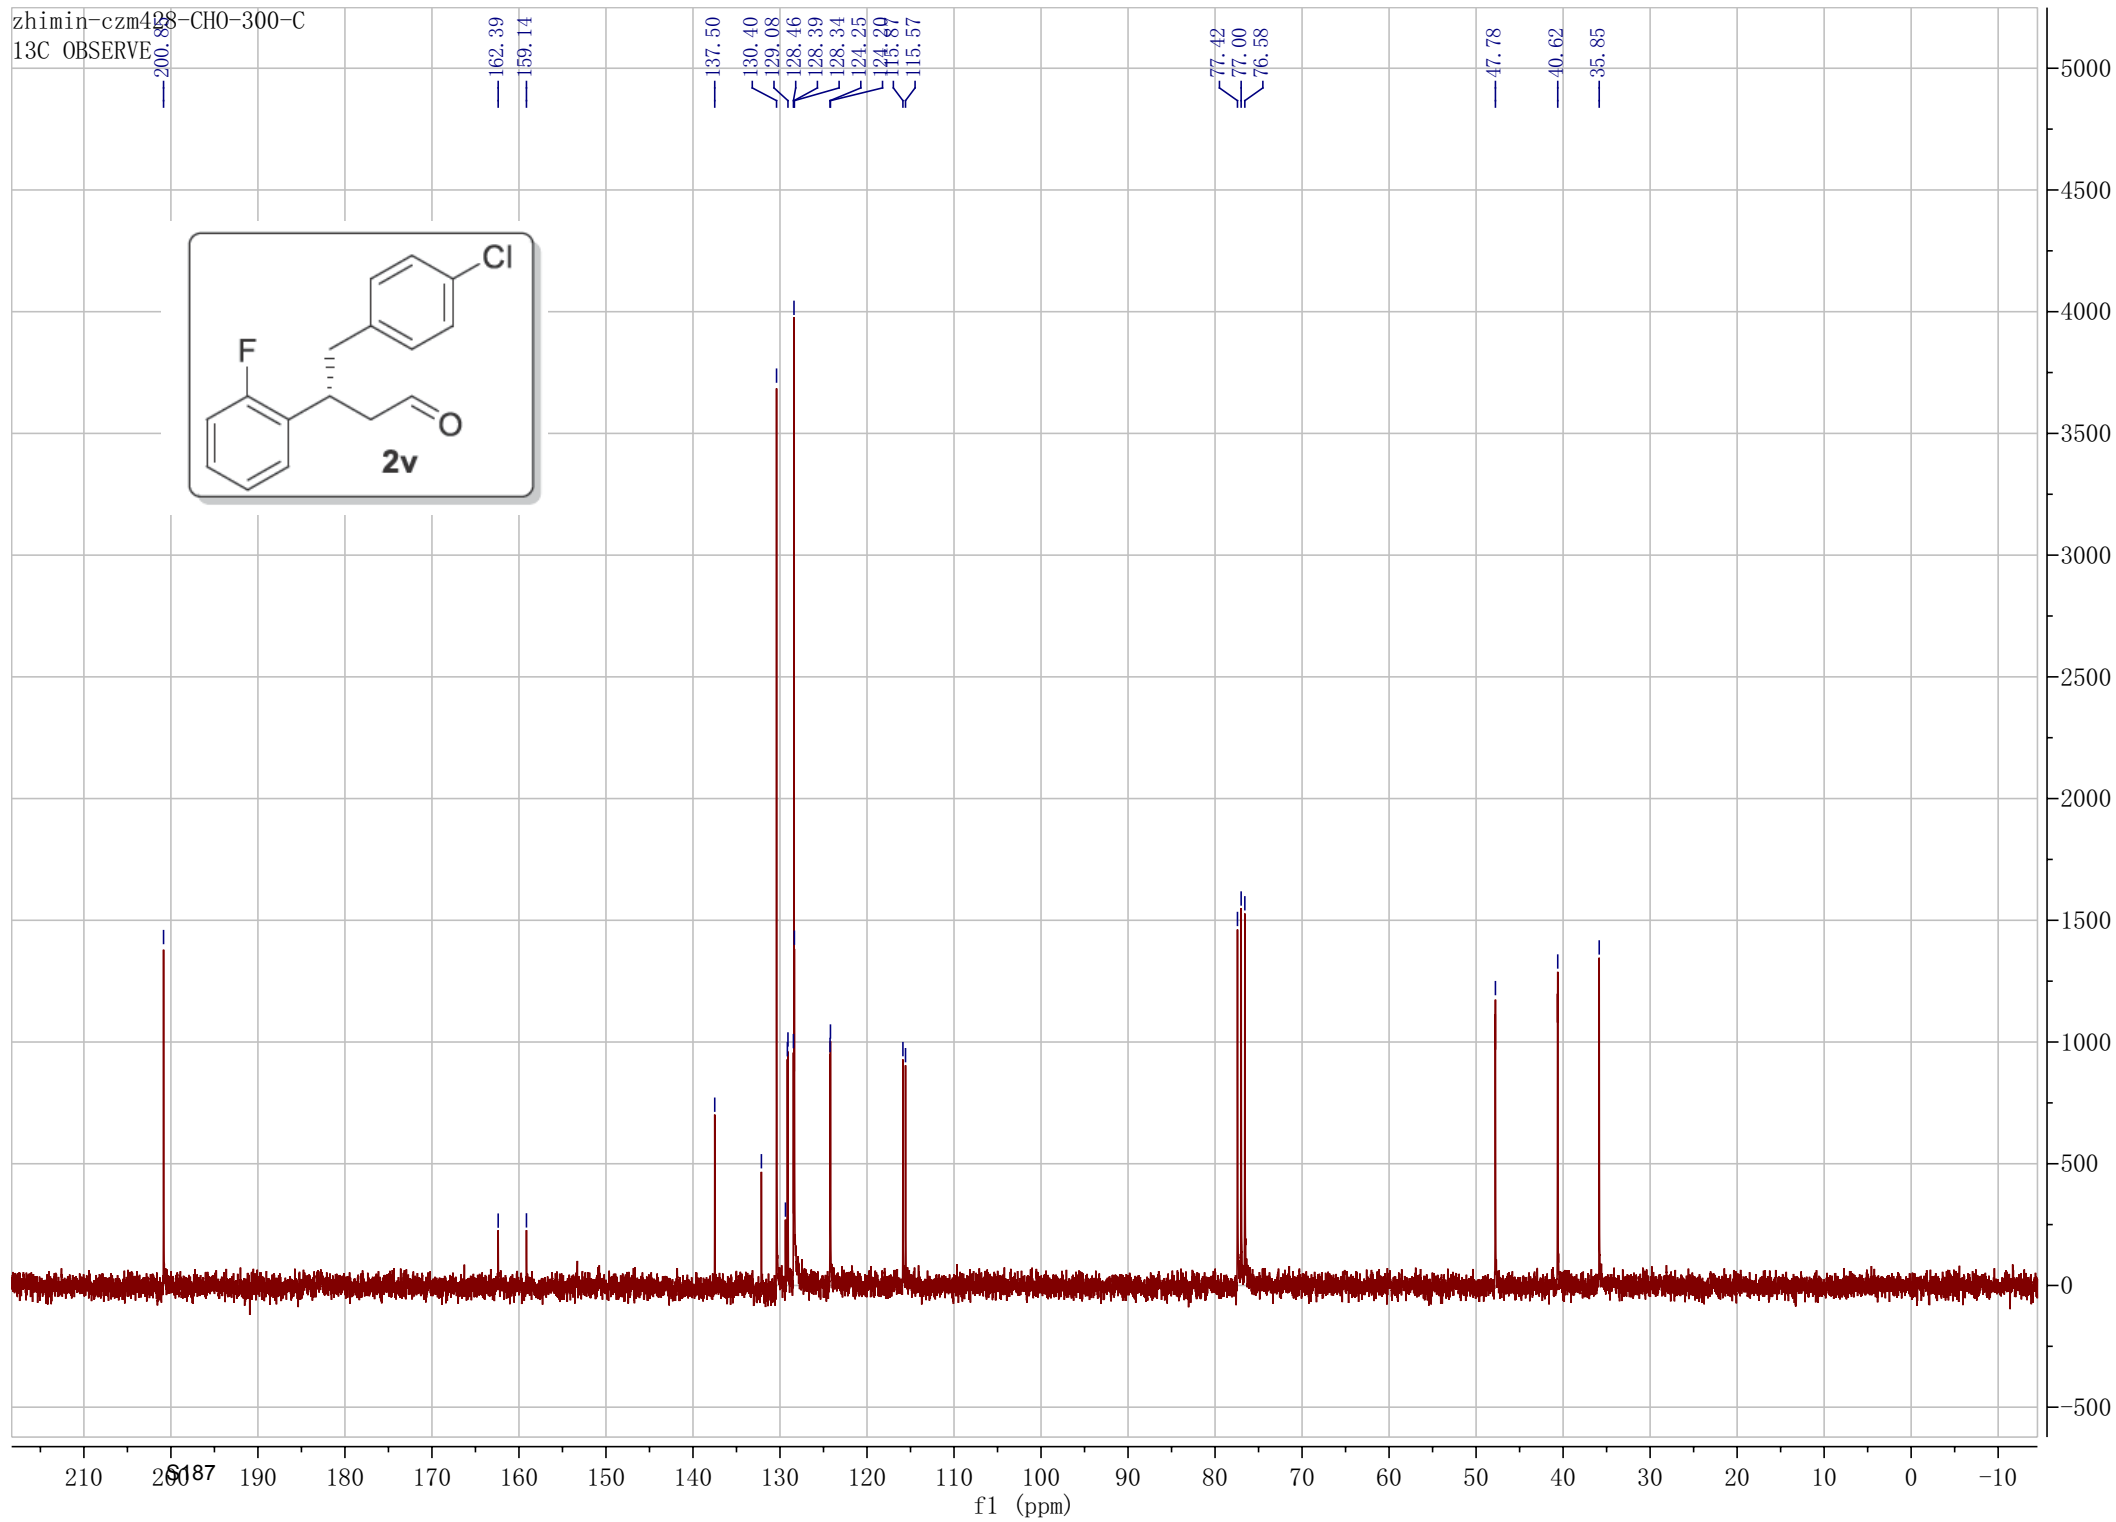

zhimin-czm428-CHO-300-F

19F OBSERVE

STANDARD PARAMETERS

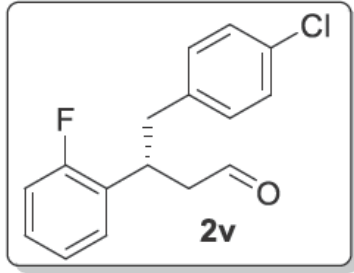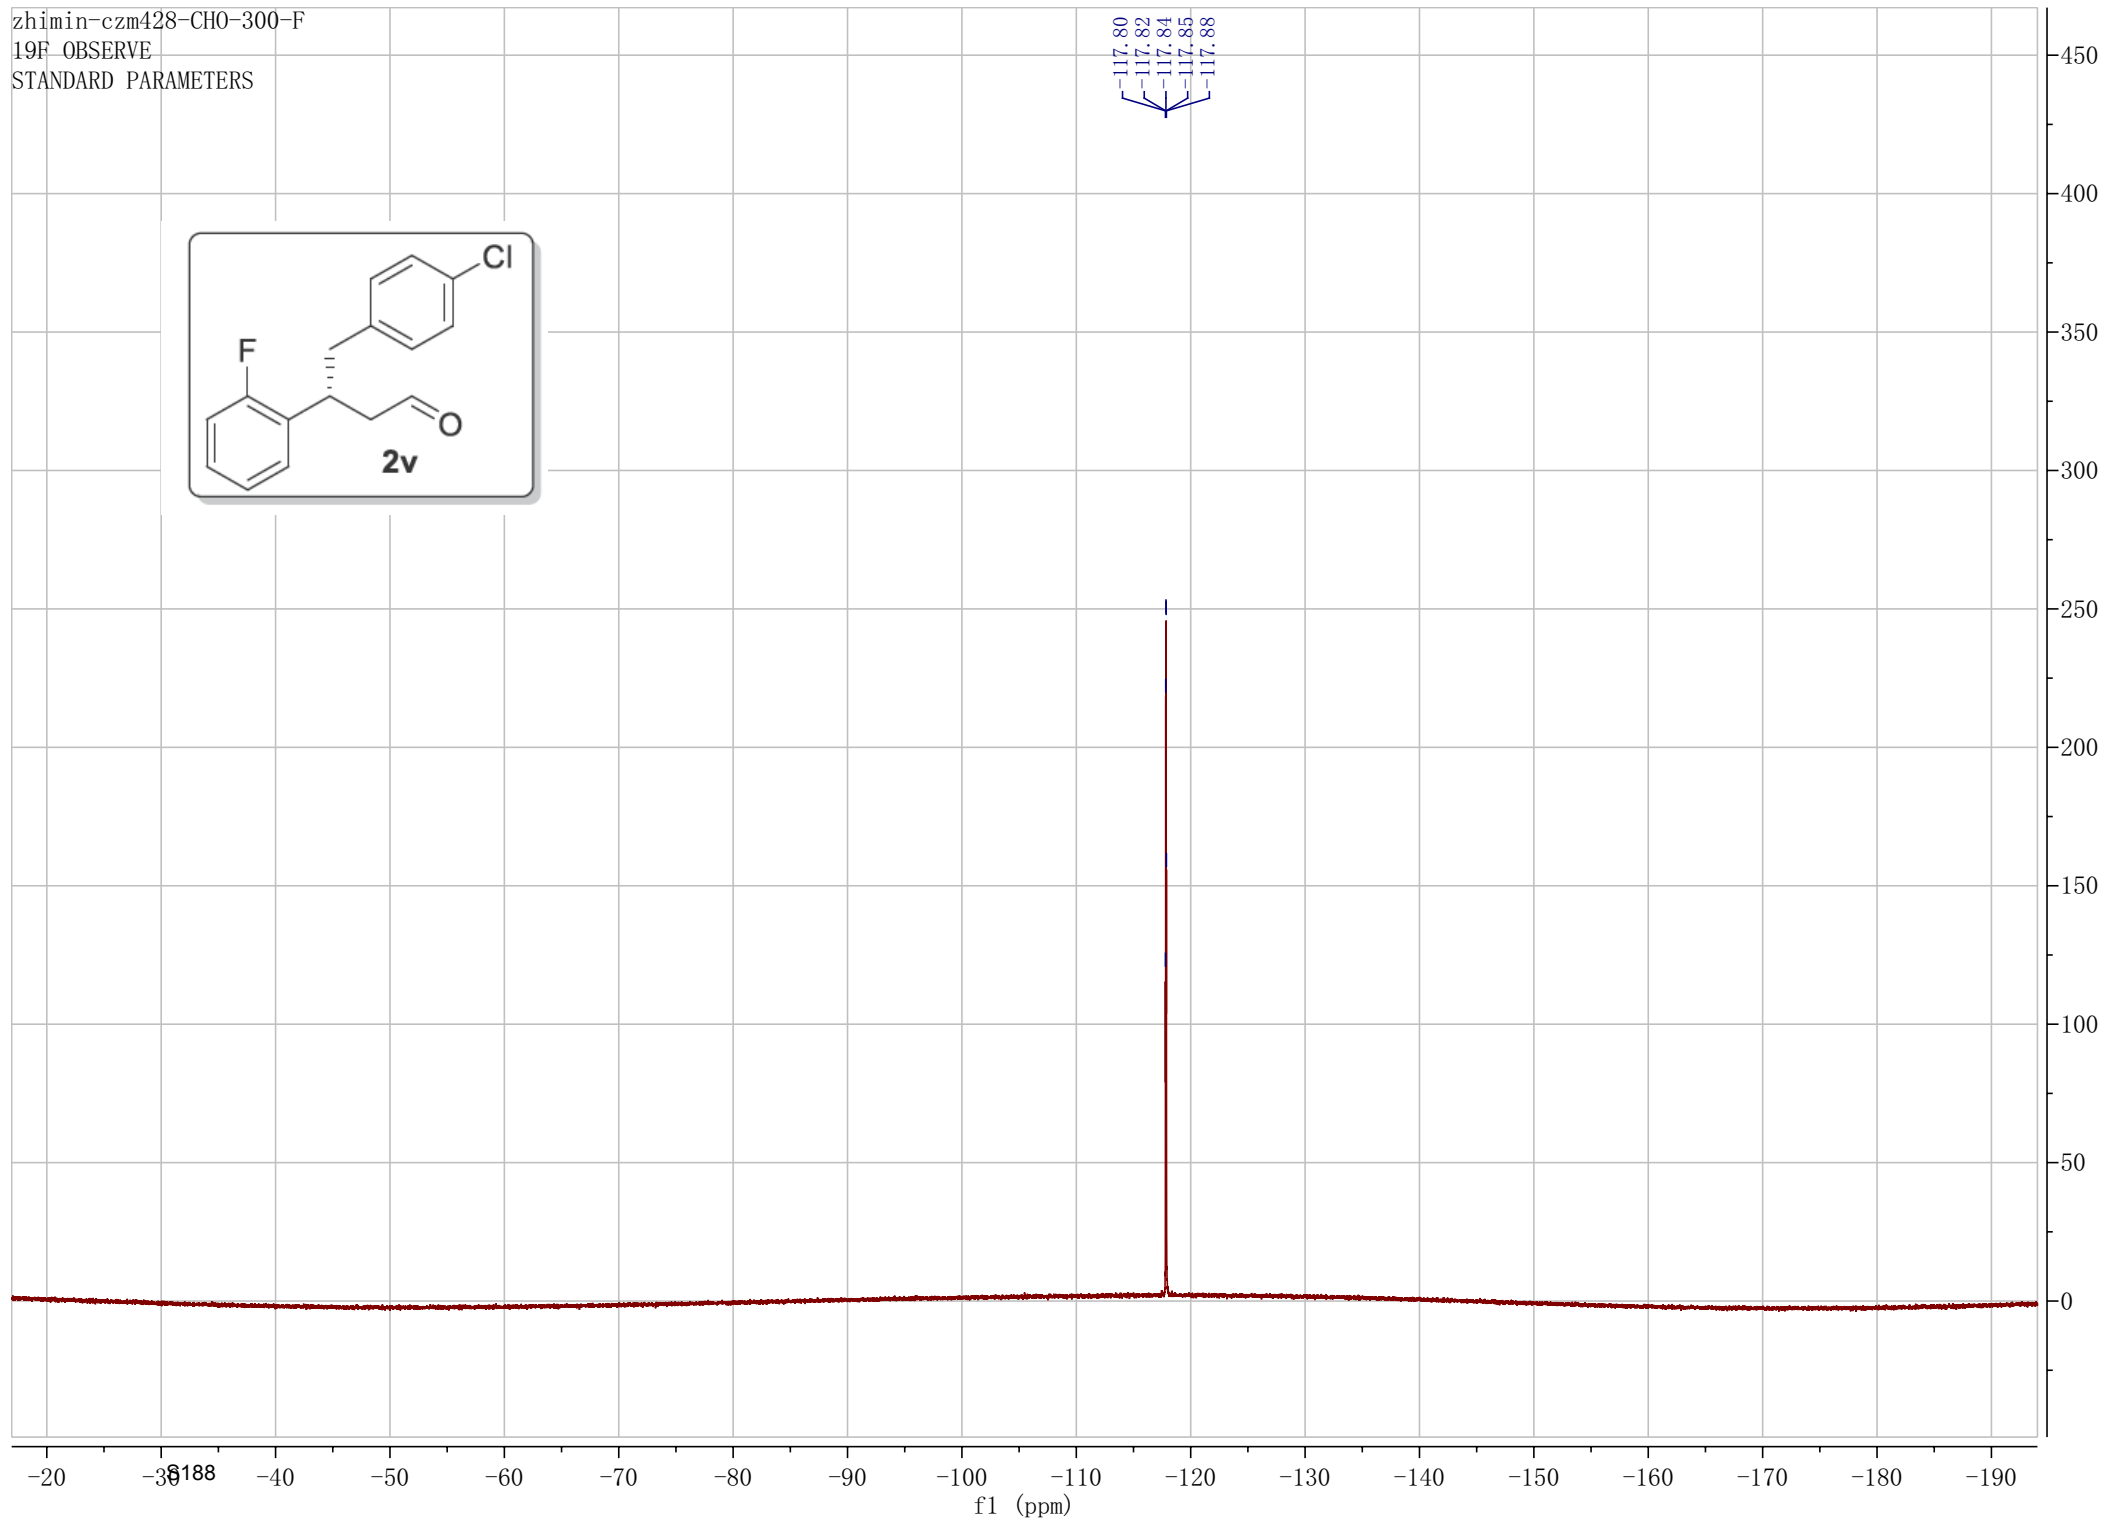

zhimin-czm428-OH-300-H  
UofUtah Unity300 NMR  
STANDARD 1H OBSERVE

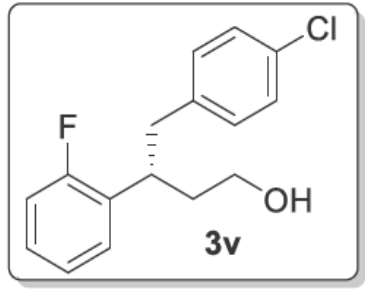

7.27  
7.27  
7.18  
7.15  
7.13  
7.11  
7.08  
7.07  
7.05  
7.03  
7.02  
7.01  
7.00  
6.97  
6.94

3.56  
3.47  
3.41  
3.38  
3.36  
3.33  
3.31  
2.94  
2.92

2.04  
2.01  
1.99  
1.97  
1.95  
1.93  
1.91  
1.89

1.21

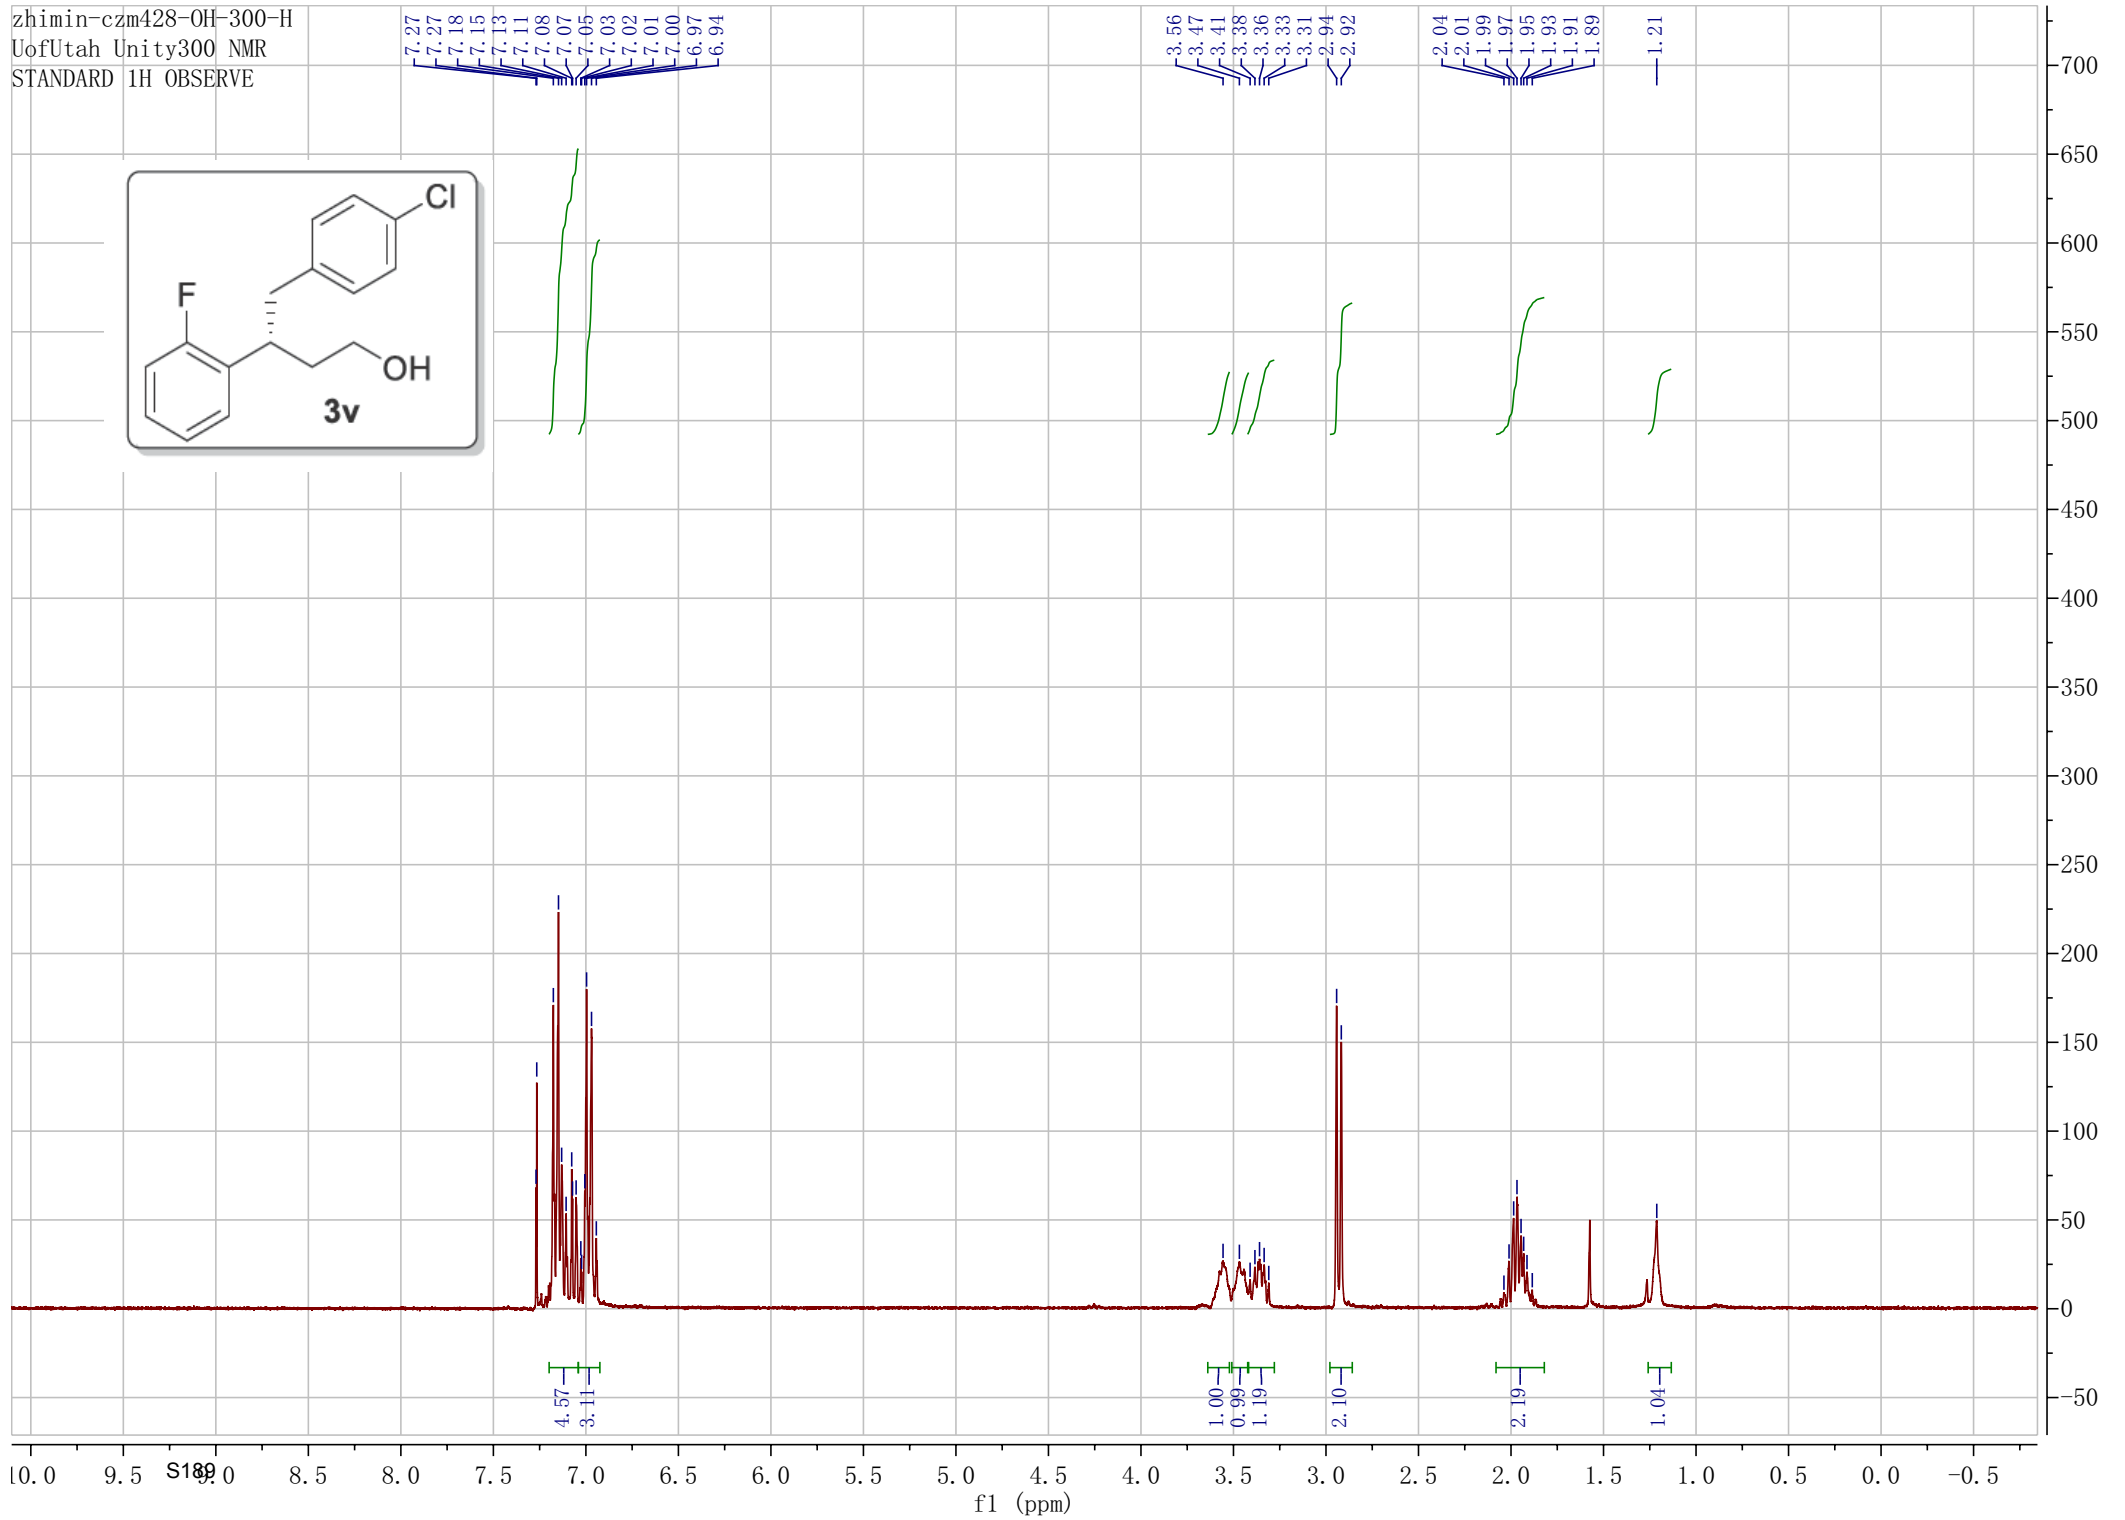

zhimin-czm428-OH-300-C  
13C OBSERVE

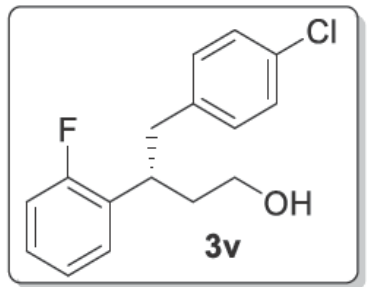

162.71  
159.47  
138.42  
130.33  
129.02  
128.95  
128.23  
127.95  
127.84  
124.19  
119.68  
115.38

77.42  
77.00  
76.58  
60.86  
41.37  
37.59  
37.22

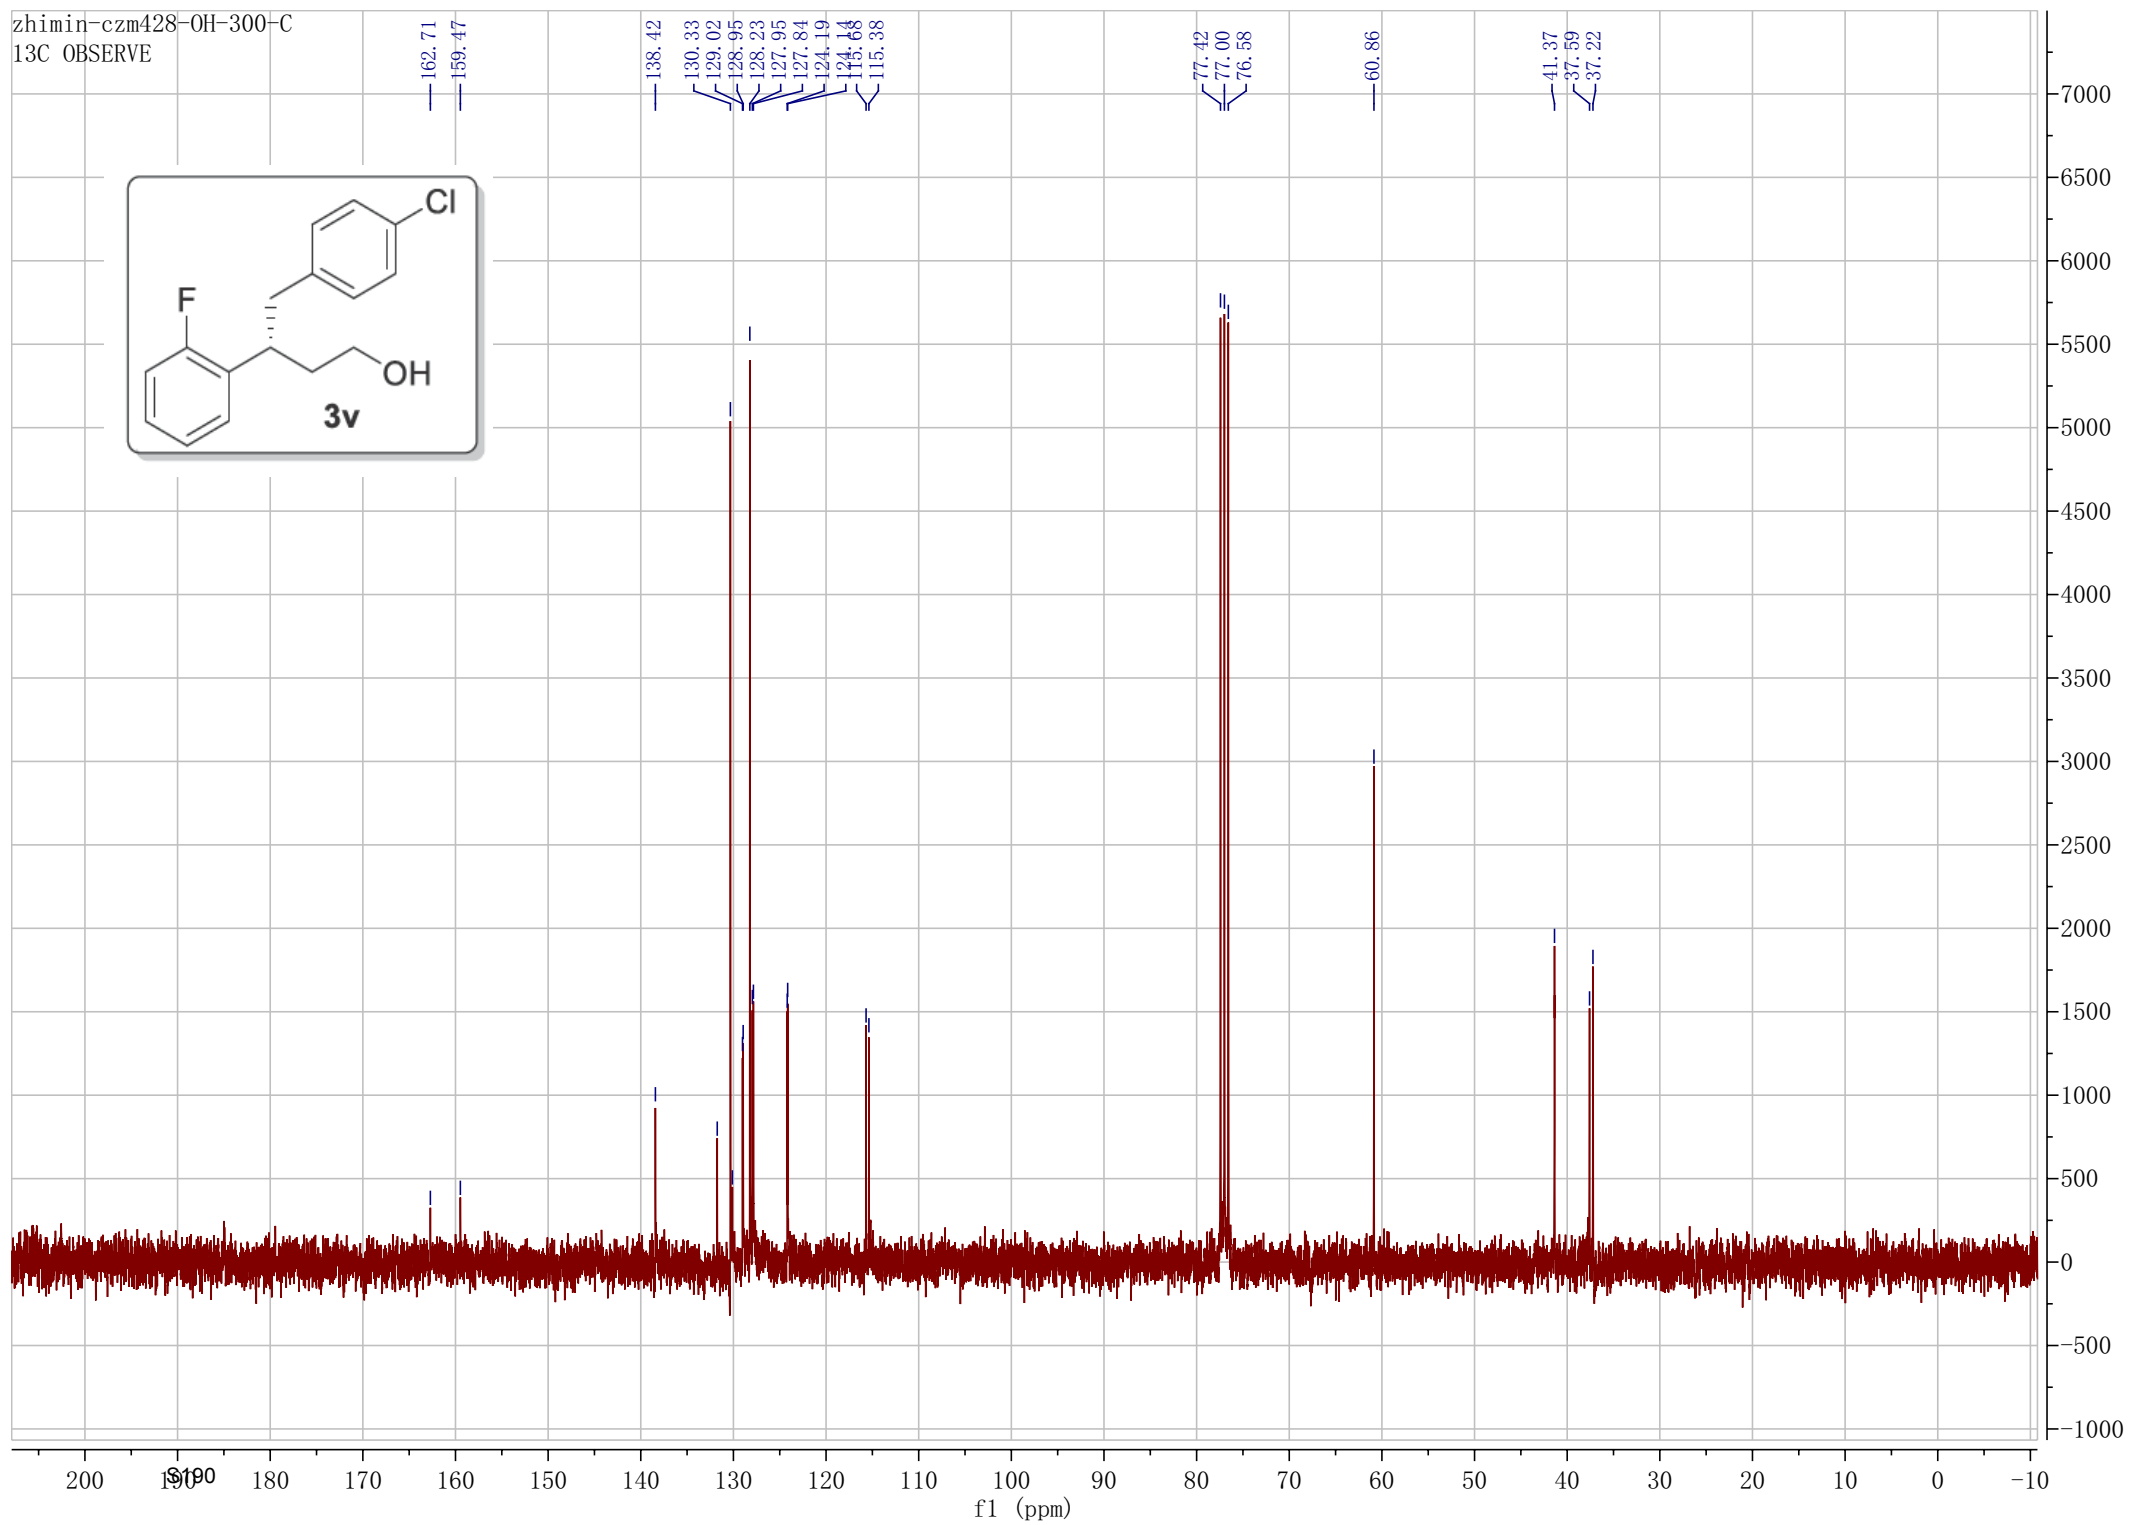

zhimin-czm428-OH-300-F  
19F OBSERVE  
STANDARD PARAMETERS

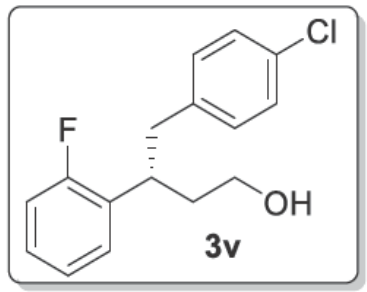

-118.39  
-118.41  
-118.43  
-118.45  
-118.47

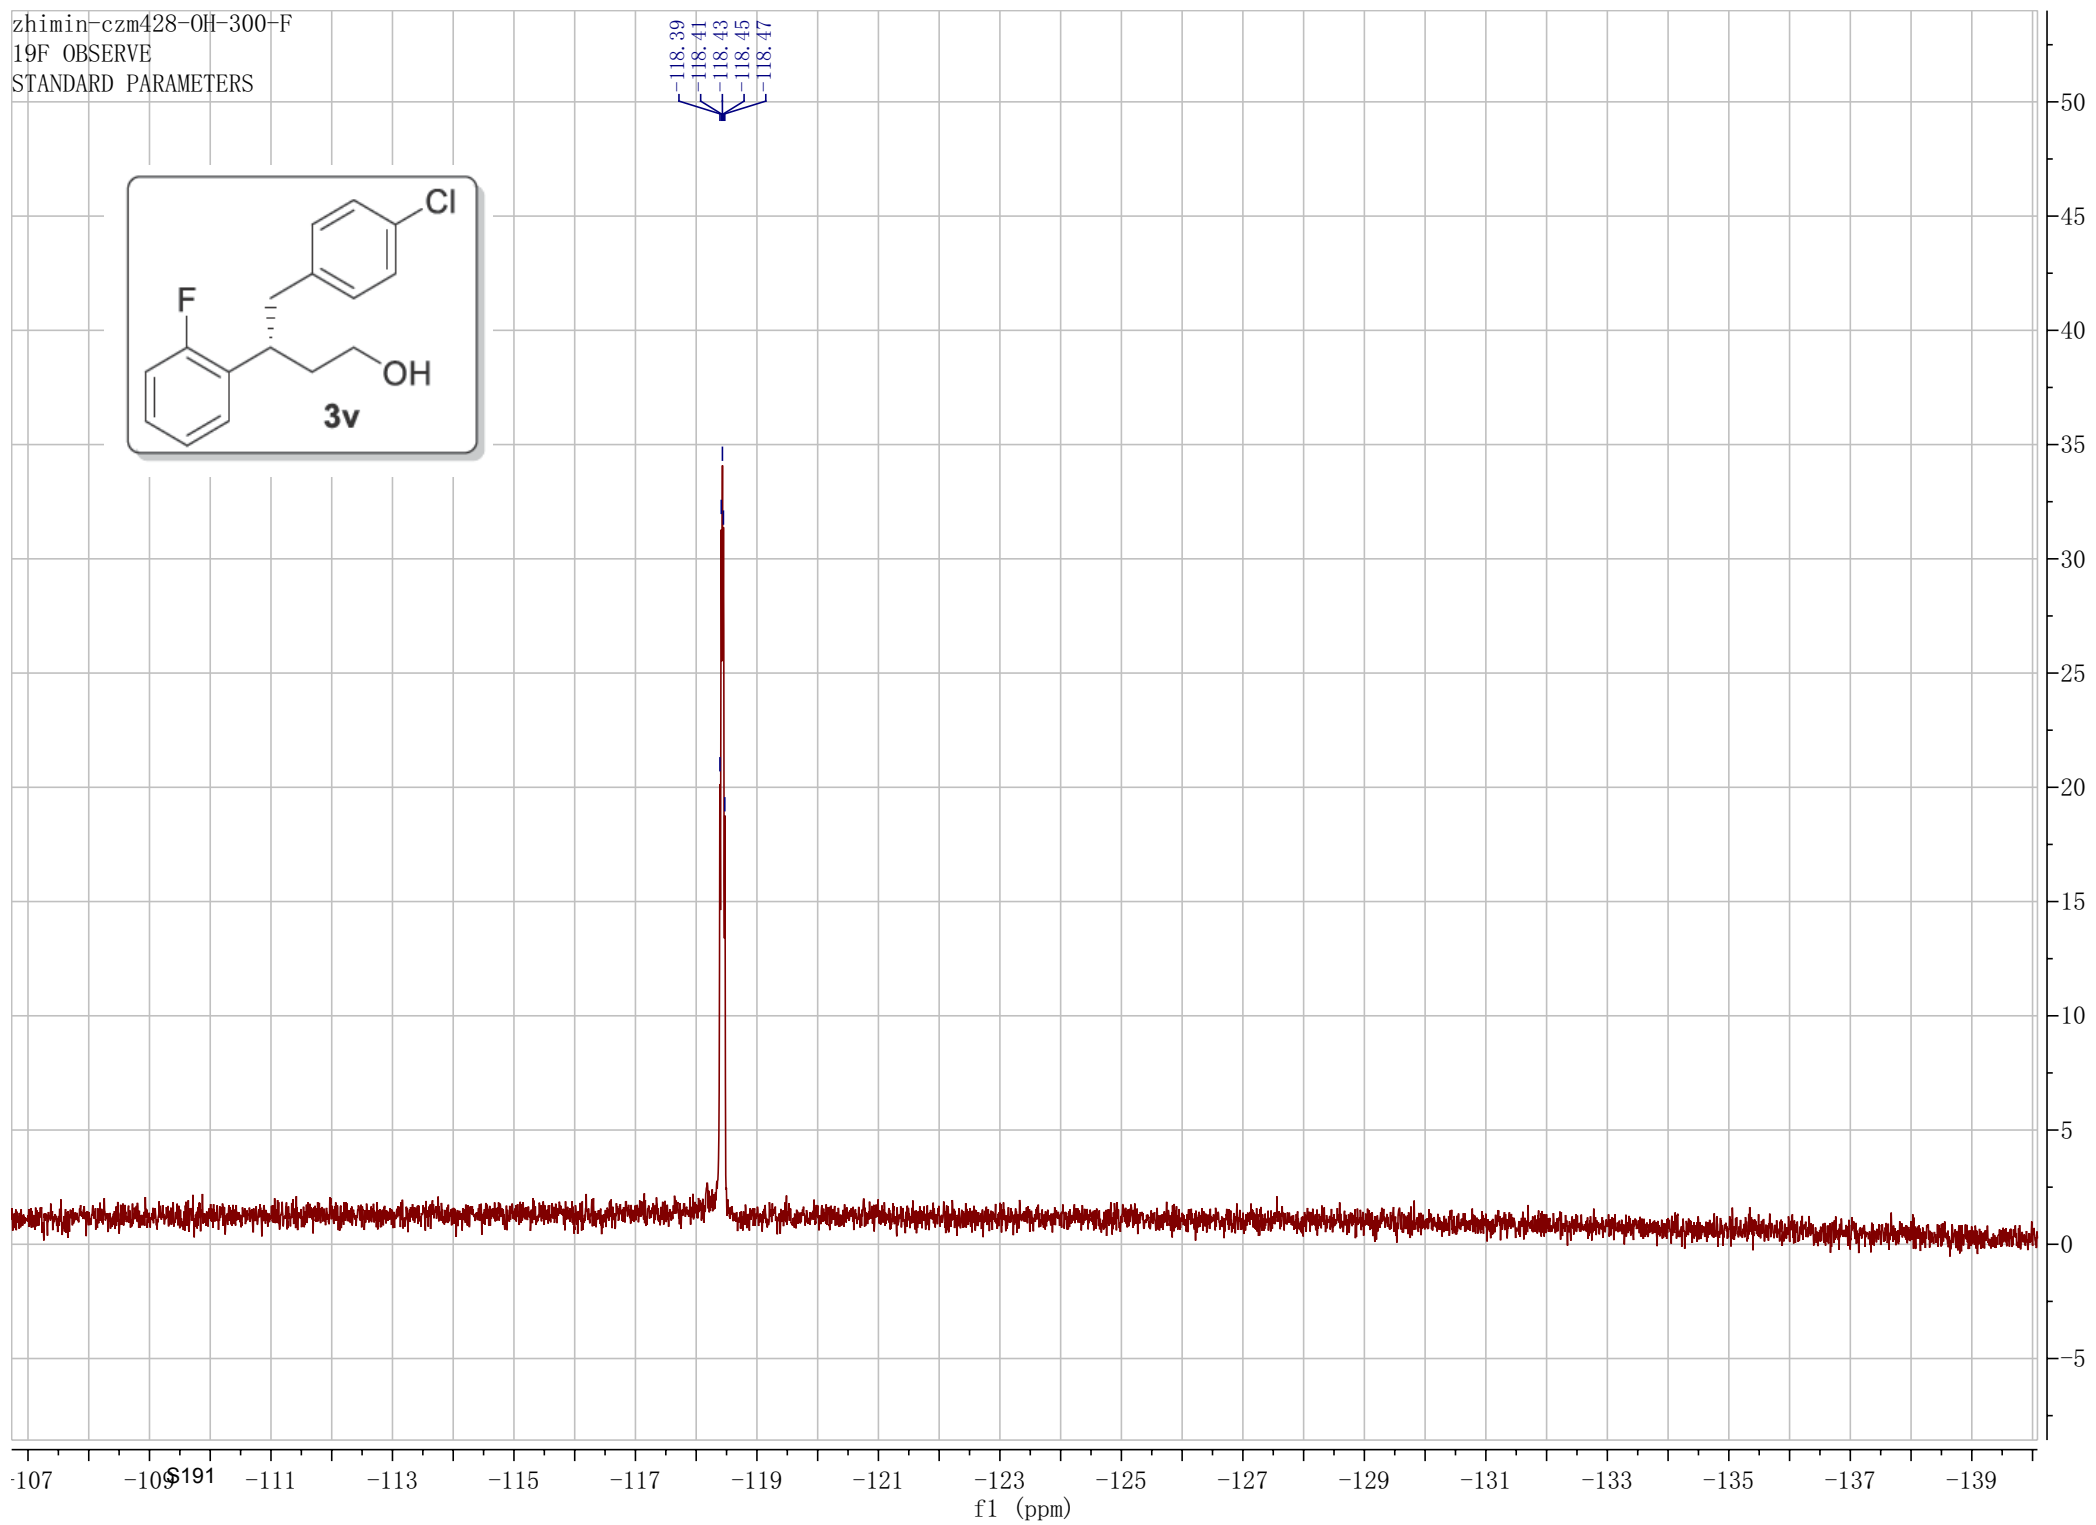

zhimin-czm361-CHO-500-H  
STANDARD PROTON PARAMETERS

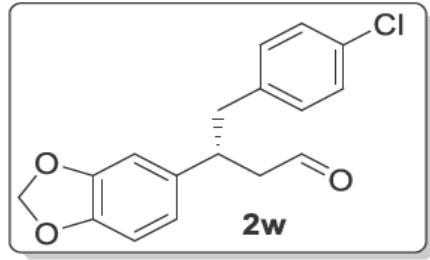

7.26  
7.20  
7.19  
7.18  
7.17  
6.97  
6.96  
6.96  
6.95  
6.95  
6.94  
6.69  
6.68  
6.63  
6.62  
6.54  
5.93  
5.92  
5.92  
5.91  
5.91

3.40  
3.38  
3.37  
3.35  
3.34  
2.88  
2.86  
2.85  
2.84  
2.84  
2.82  
2.80  
2.75  
2.75  
2.74  
2.73  
2.72  
2.71  
2.71  
2.70  
2.70  
2.69  
2.68  
2.67  
2.66  
2.66

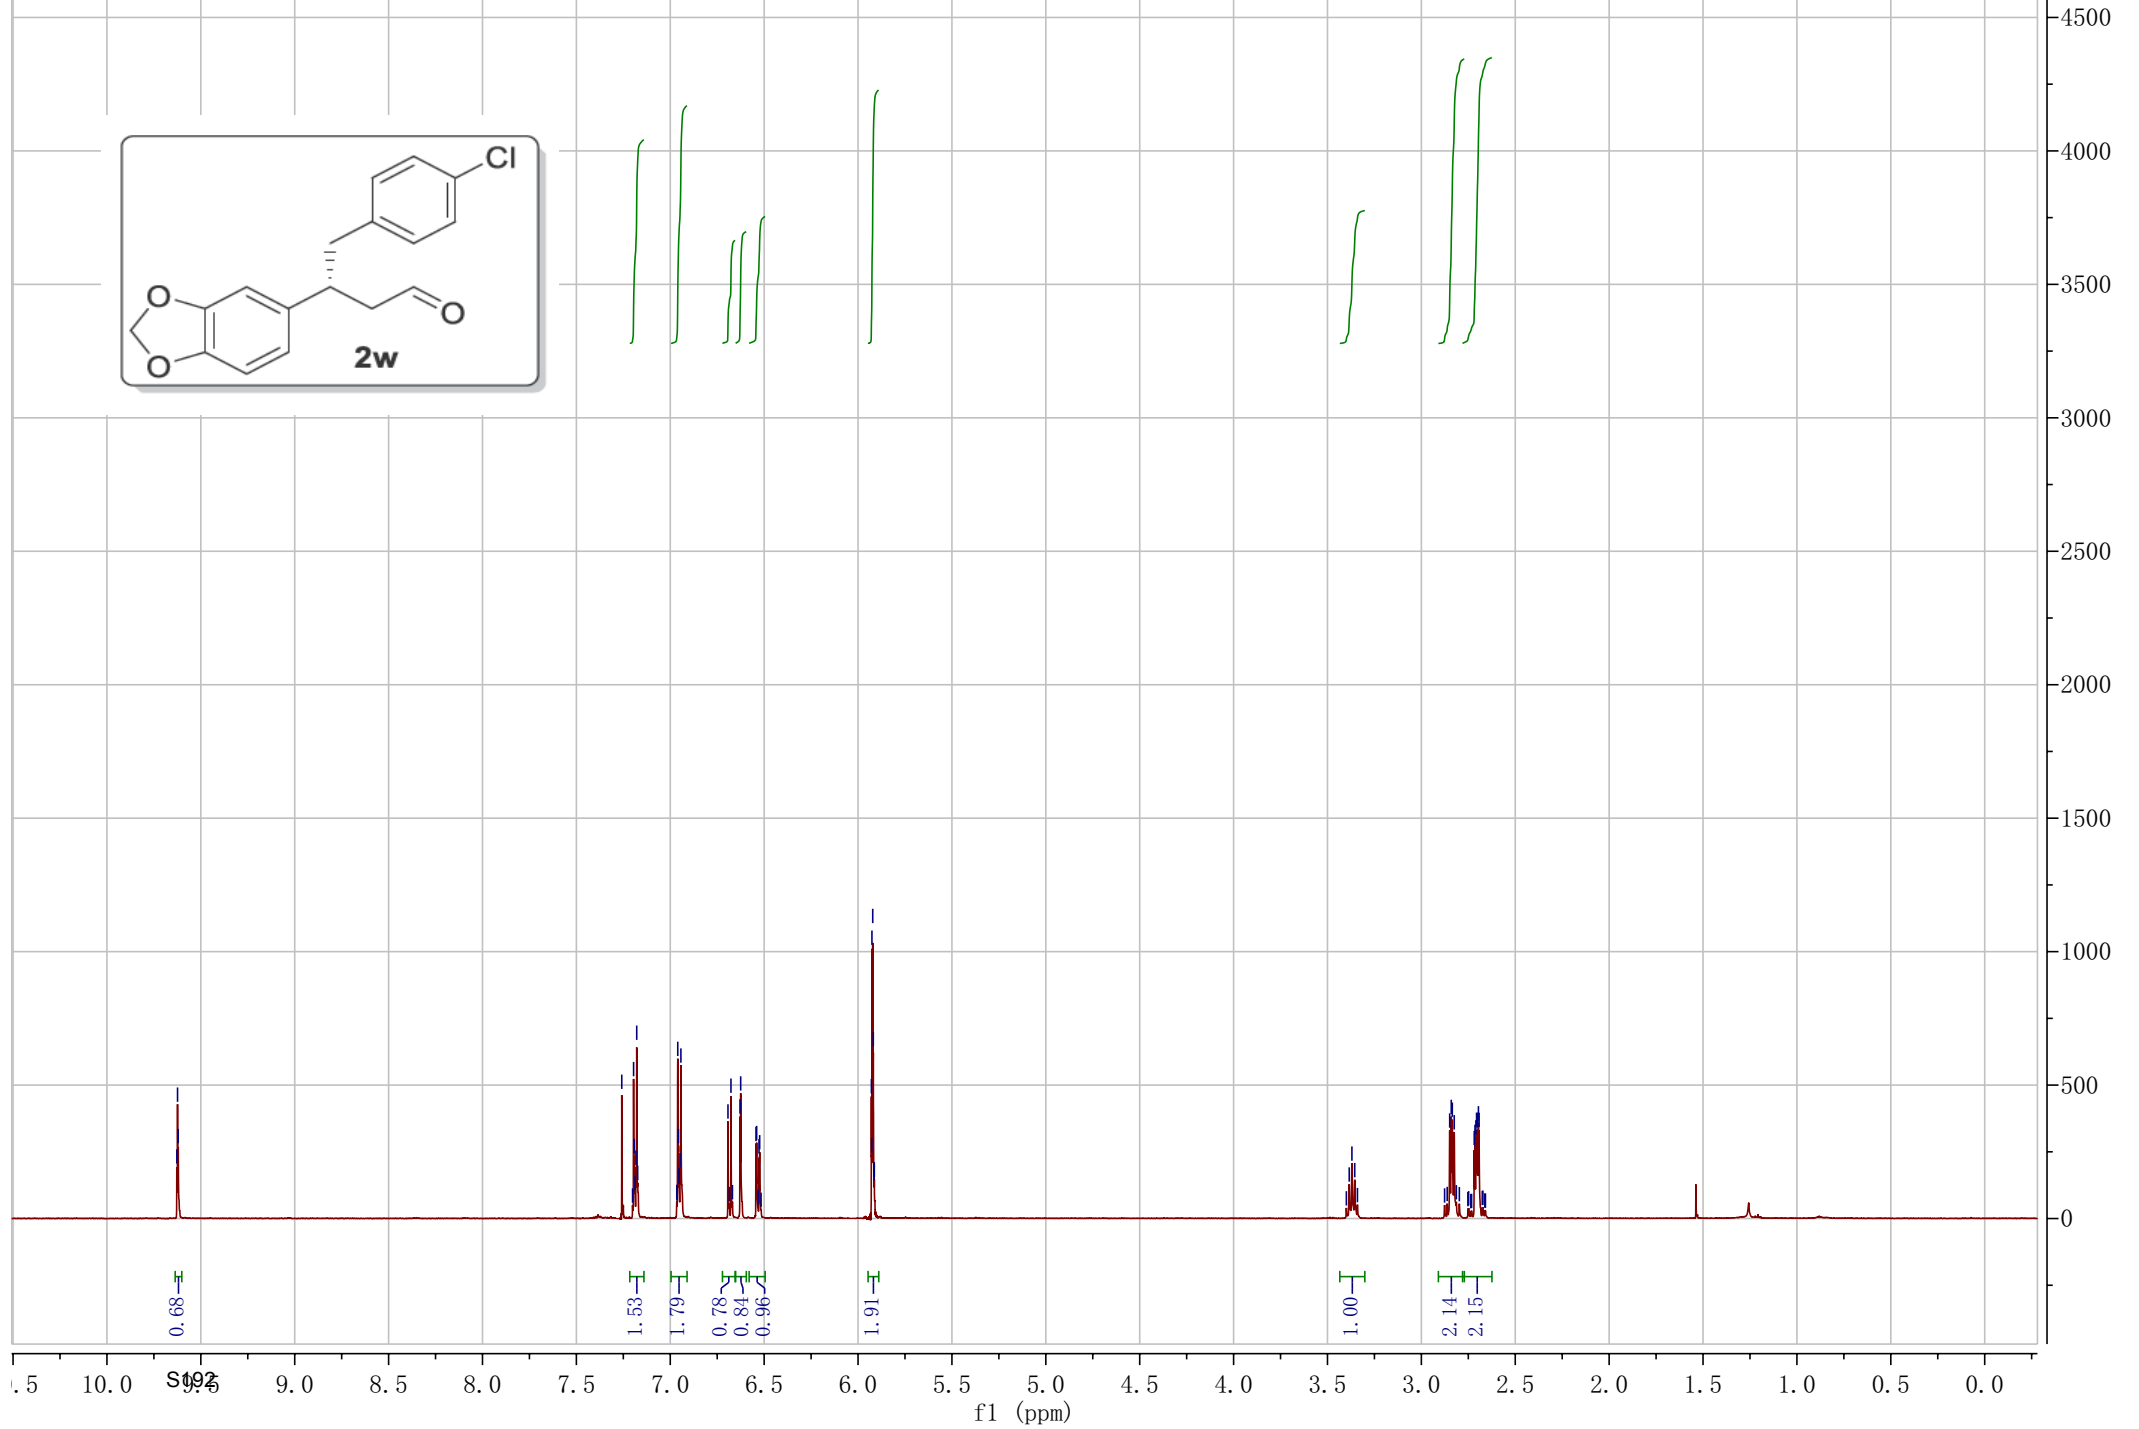

zhimin-czm361-CHO-300-C  
13C OBSERVE

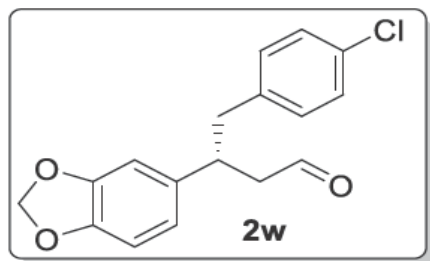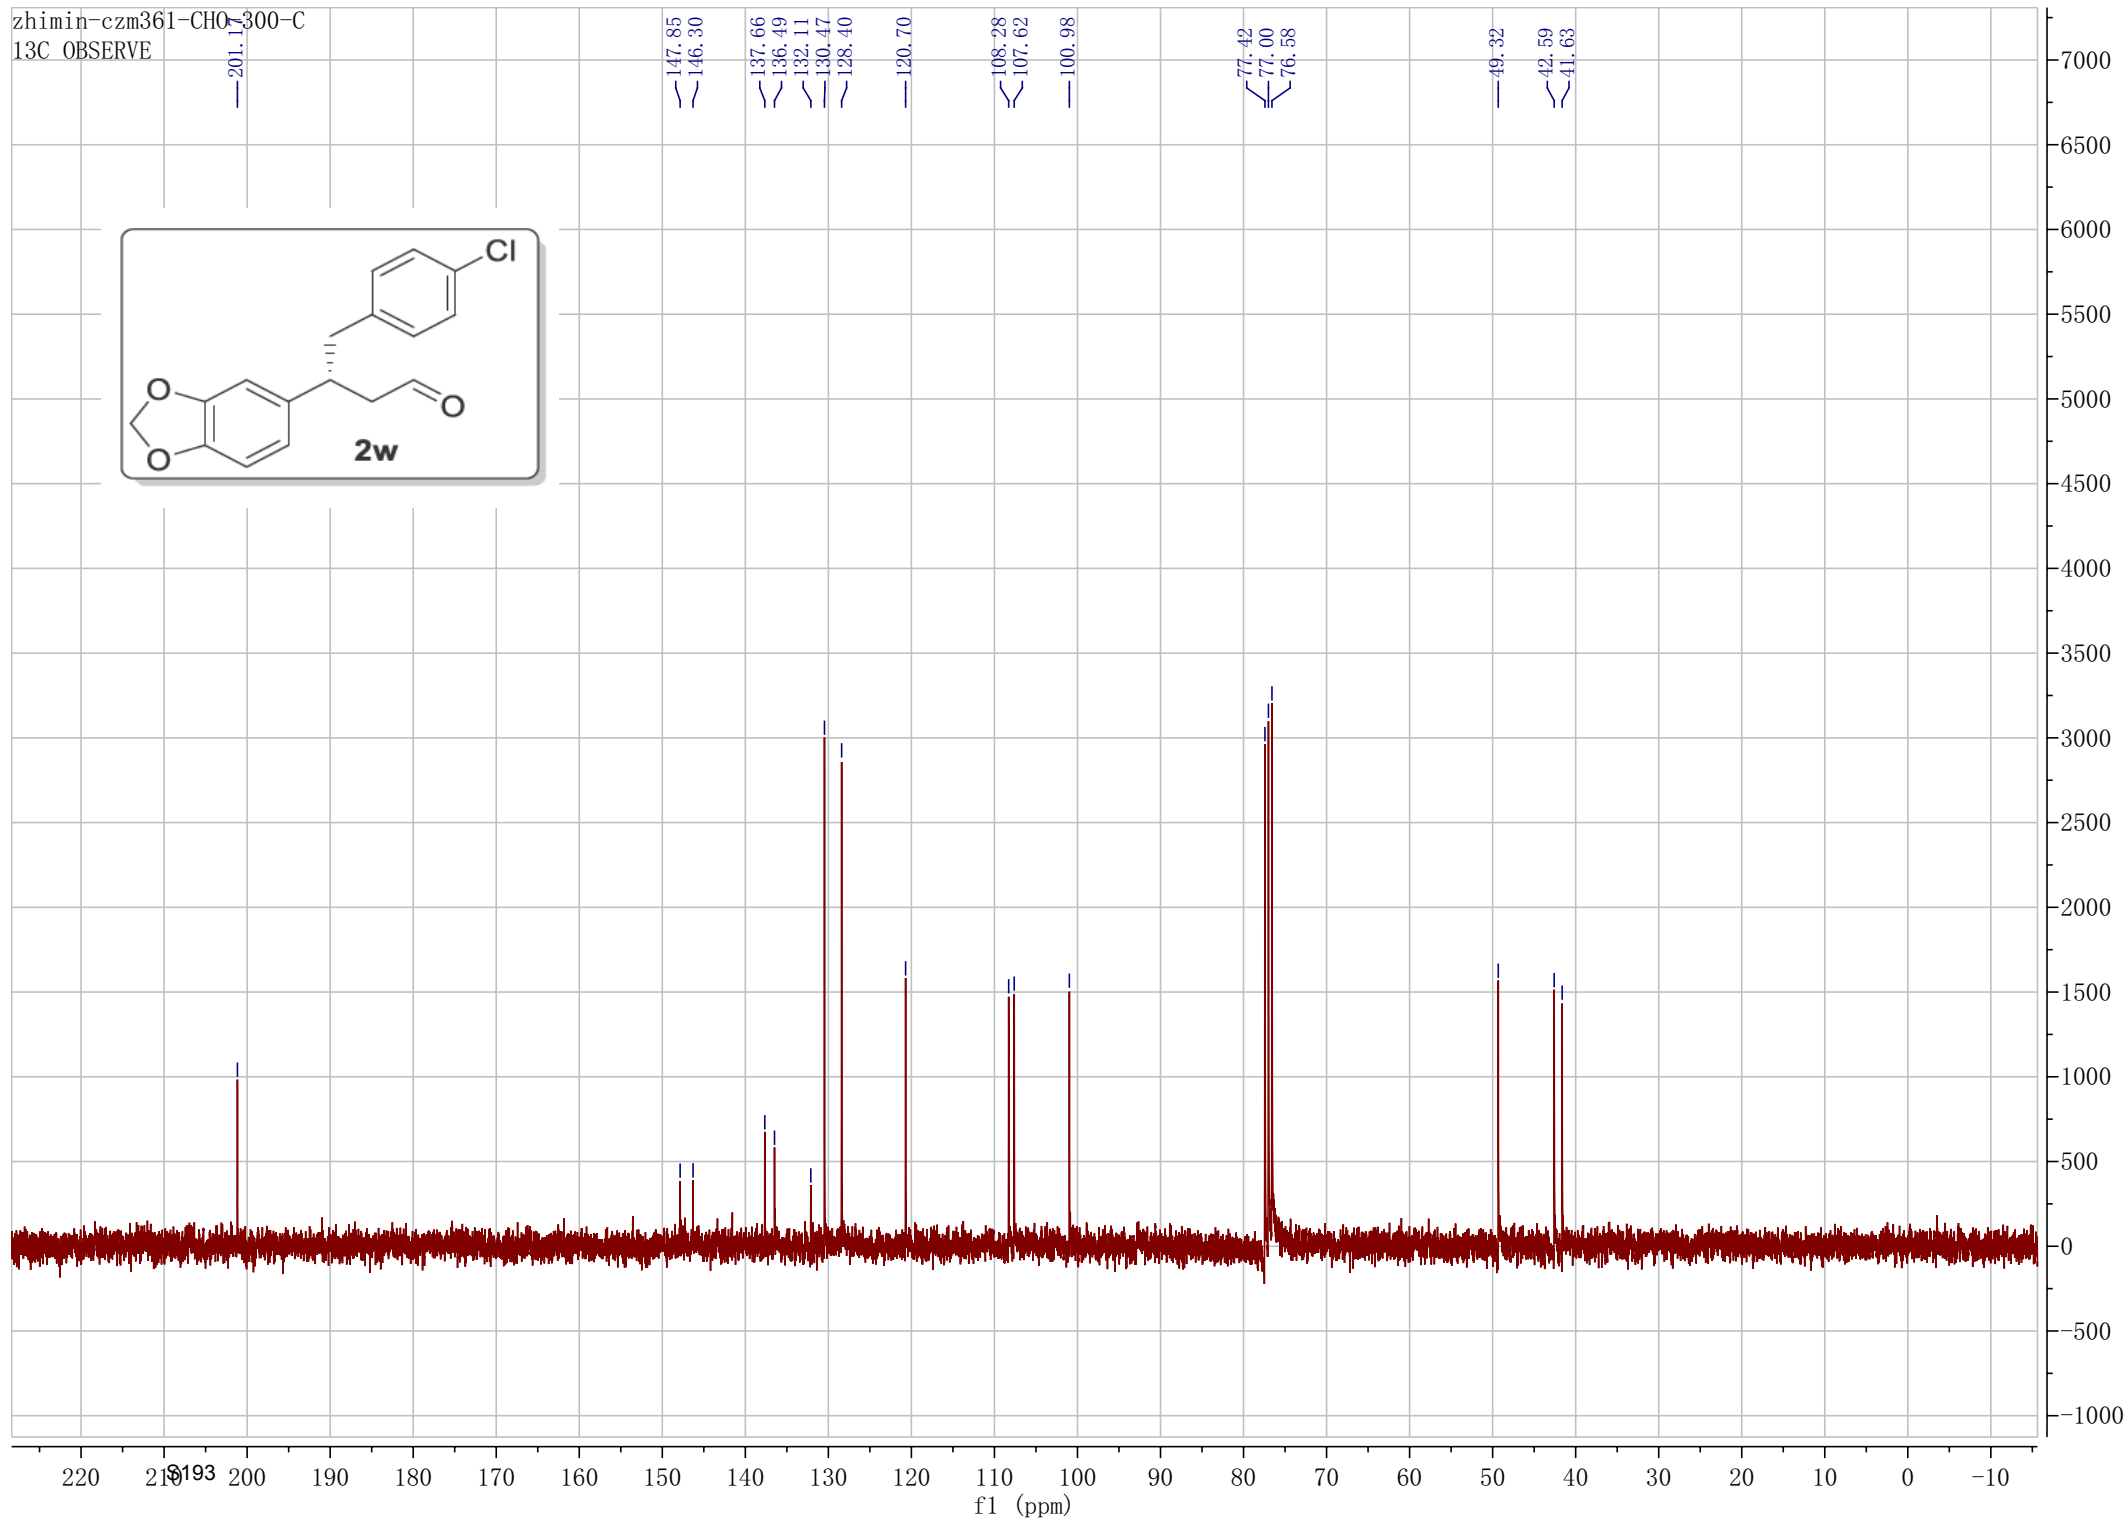

zhimin-czm457-OH-300-H  
UofUtah Unity300 NMR  
STANDARD 1H OBSERVE

7.26  
7.26  
7.18  
7.17  
7.16  
7.15  
7.15  
6.96  
6.95  
6.93  
6.92  
6.66  
6.64  
6.63  
6.63  
6.53  
5.93  
5.92  
5.92  
5.91

3.55  
3.53  
3.51  
3.48  
3.45  
3.43  
2.91  
2.90  
2.87  
2.83  
2.82  
2.79

1.93  
1.92  
1.91  
1.90  
1.87  
1.84  
1.82  
1.81  
1.79  
1.77  
1.74  
1.12

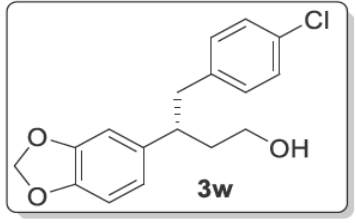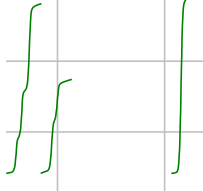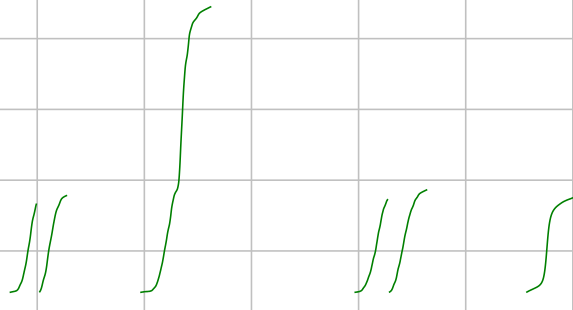

8.94

9.0 8.5 8.0 7.5 7.0 6.5 6.0 5.5 5.0 4.5 4.0 3.5 3.0 2.5 2.0 1.5 1.0 0.5 0.0

f1 (ppm)

1.83

1.99

1.91

1.06

2.00

1.00

1.09

3.21

1.05

1.16

1.07

-100

1800



zhimin-czm457-OH-300-C  
13C OBSERVE

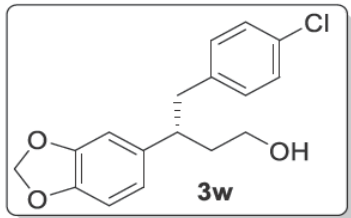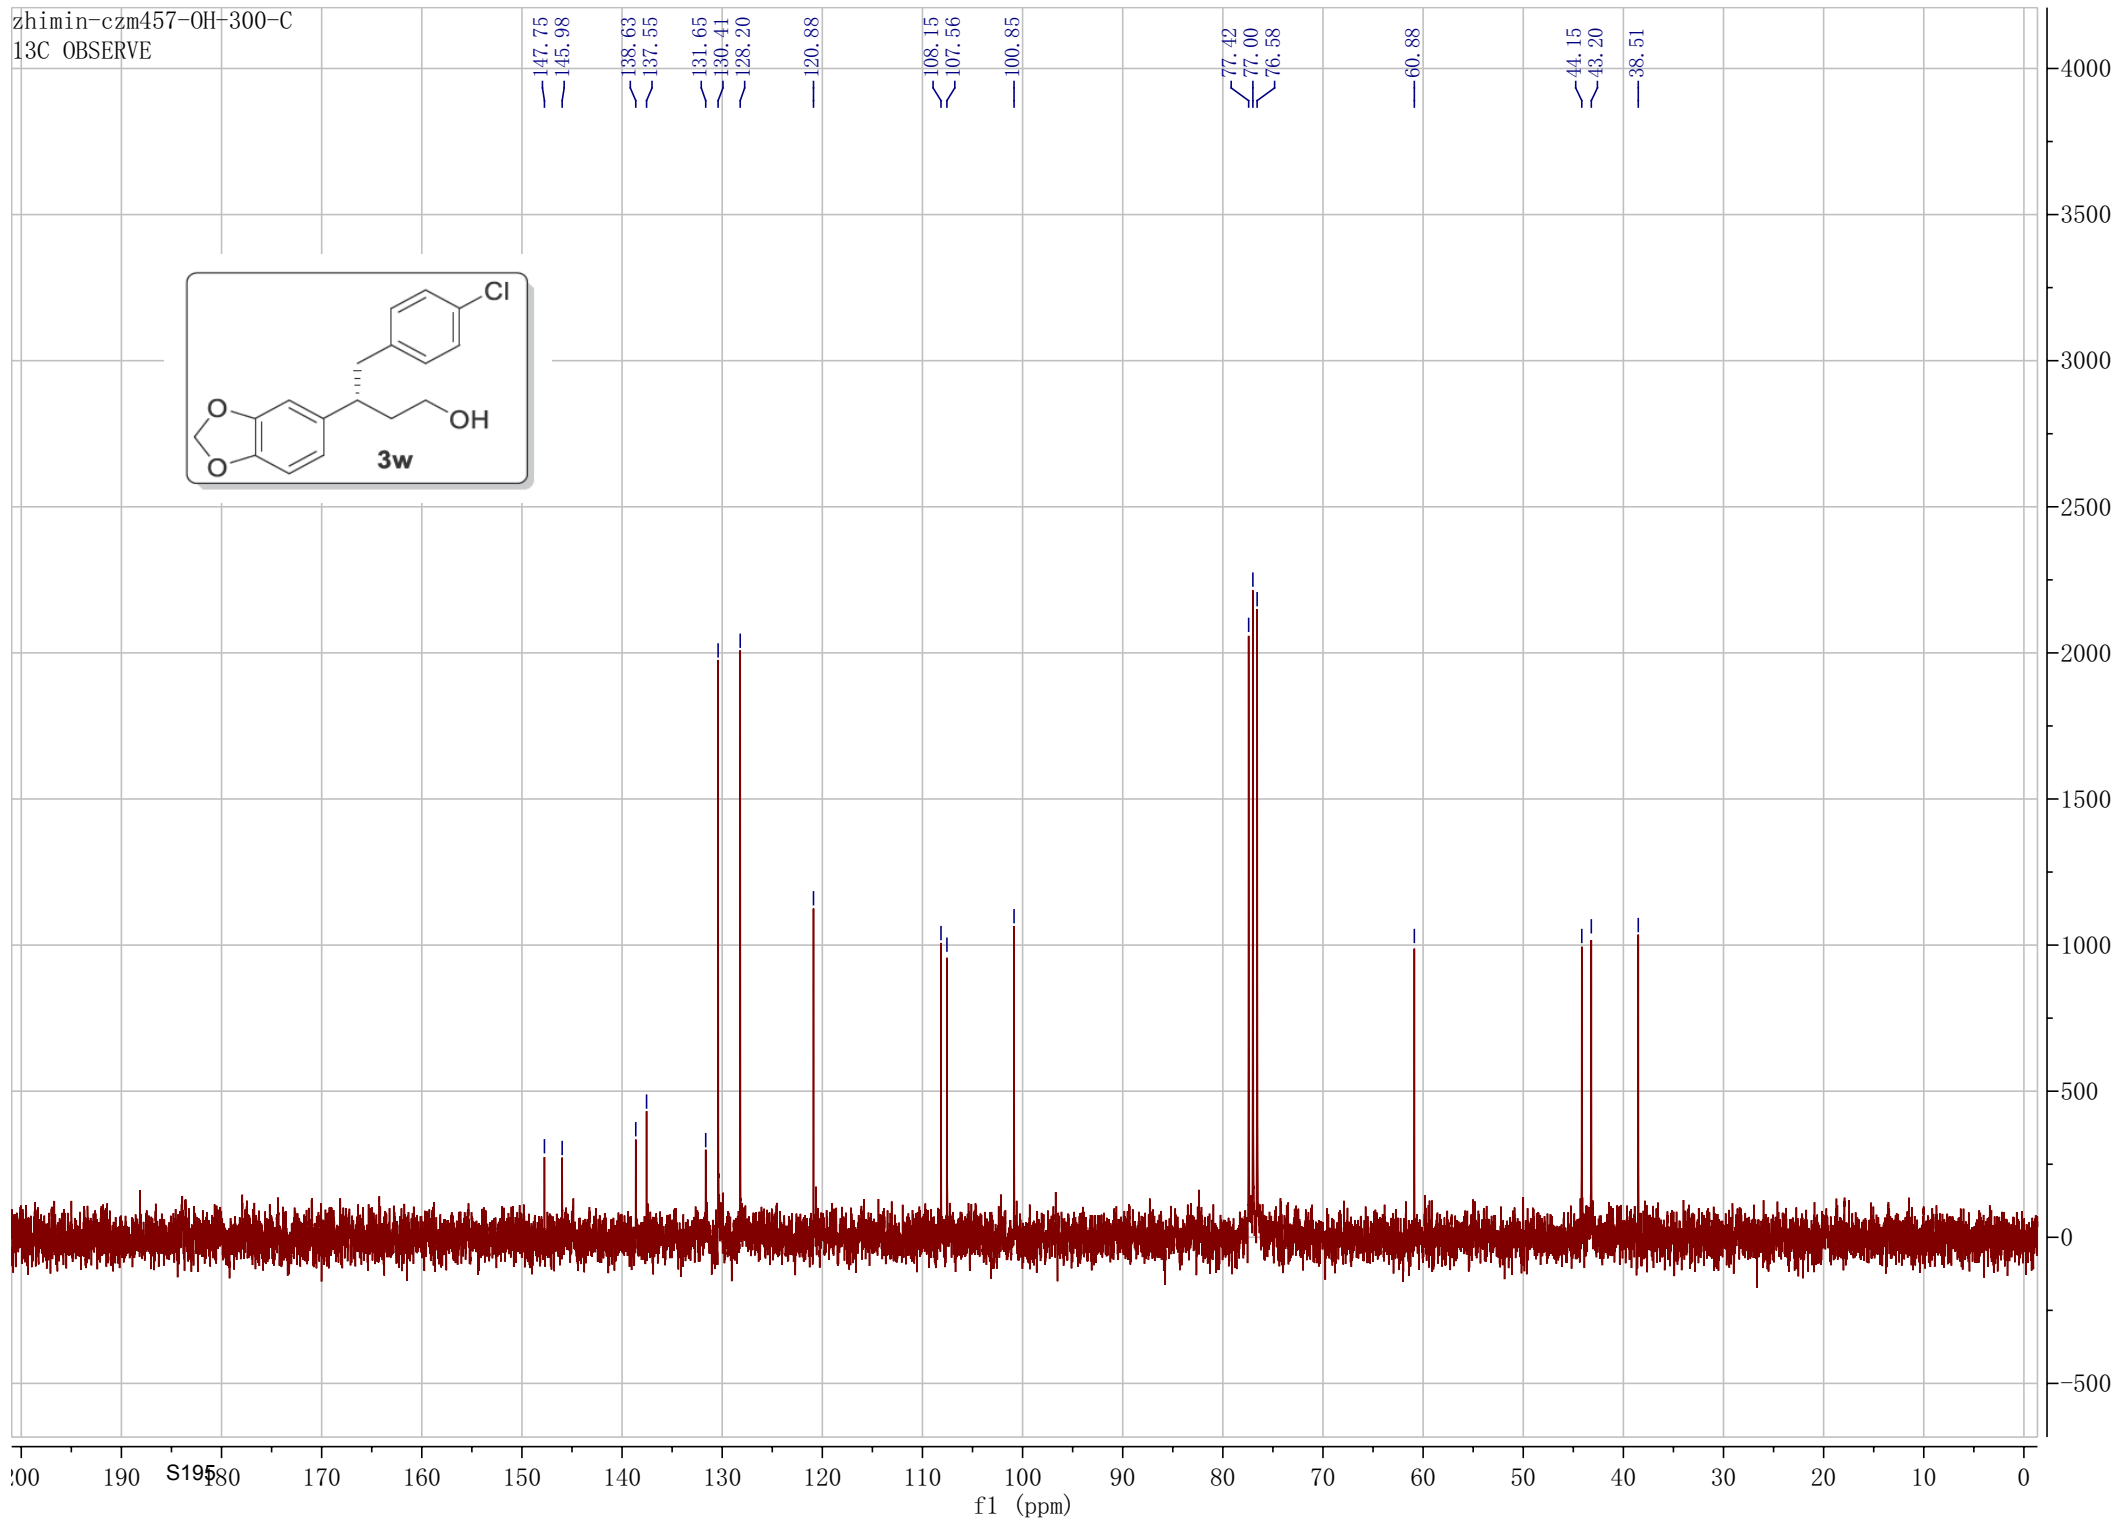

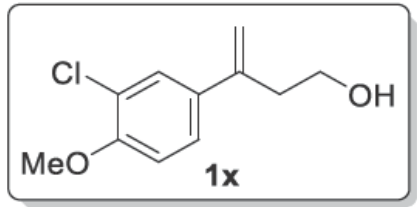

7.44  
7.44  
7.29  
7.28  
7.27  
7.26  
6.89  
6.88

5.35  
5.35  
5.11  
5.11

3.90  
3.74  
3.72  
3.71  
3.70

2.75  
2.74  
2.73  
2.73  
2.72  
2.72

1.44  
1.43  
1.42

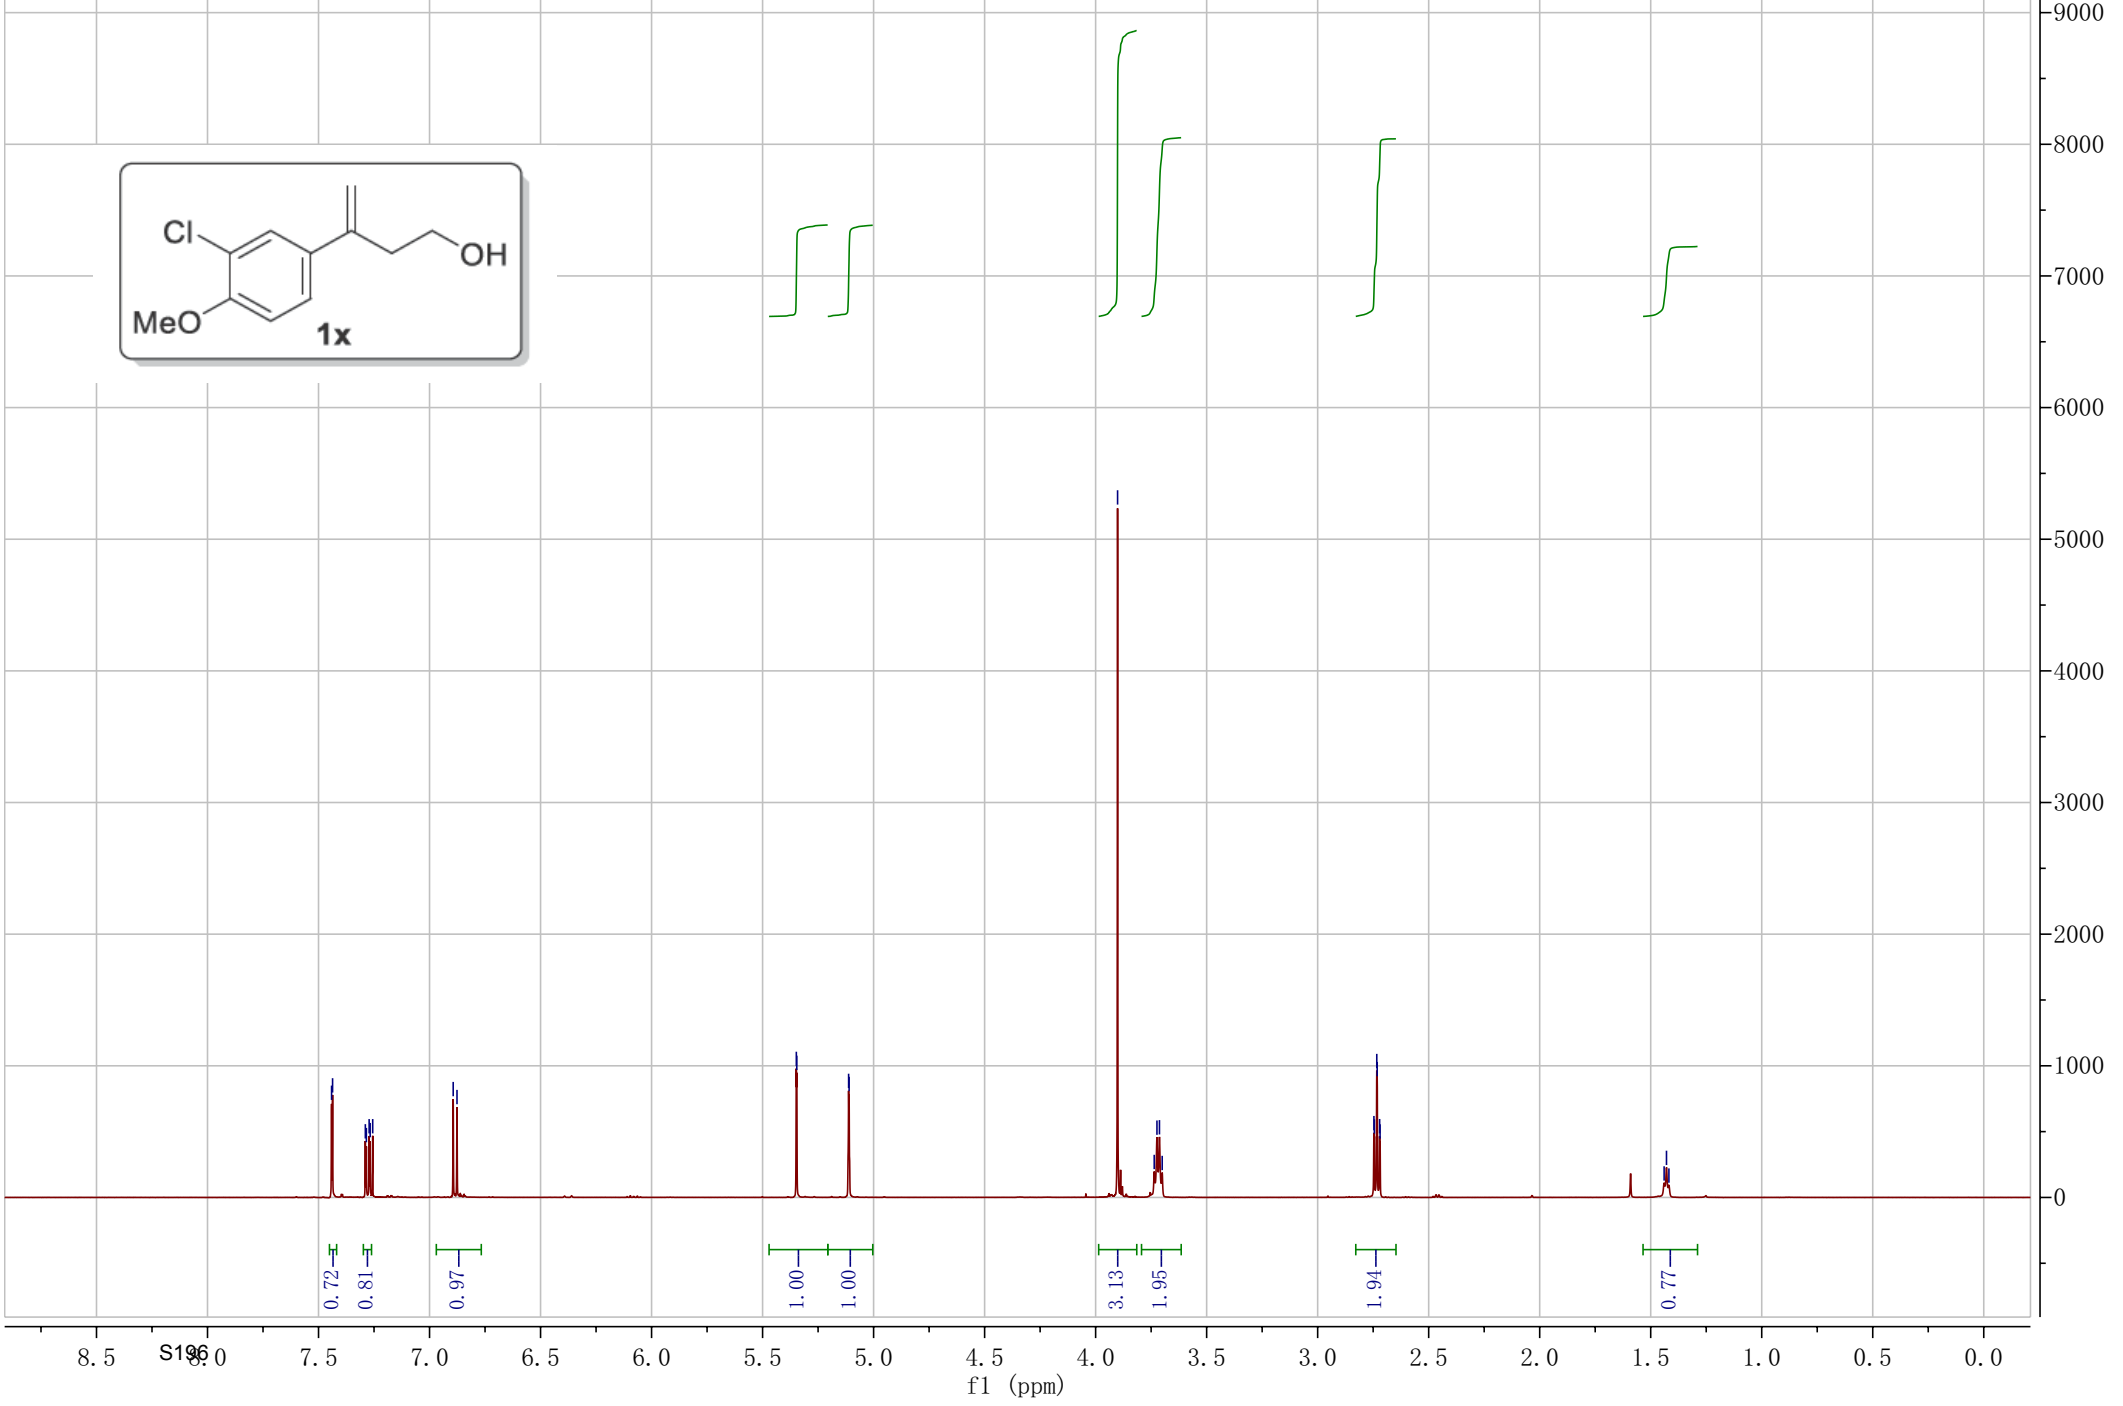

8.5 8.0 7.5 7.0 6.5 6.0 5.5 5.0 4.5 4.0 3.5 3.0 2.5 2.0 1.5 1.0 0.5 0.0  
f1 (ppm)

zhimin-czmlp137-300-C  
13C OBSERVE

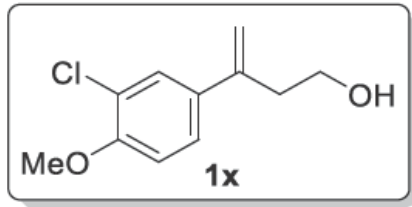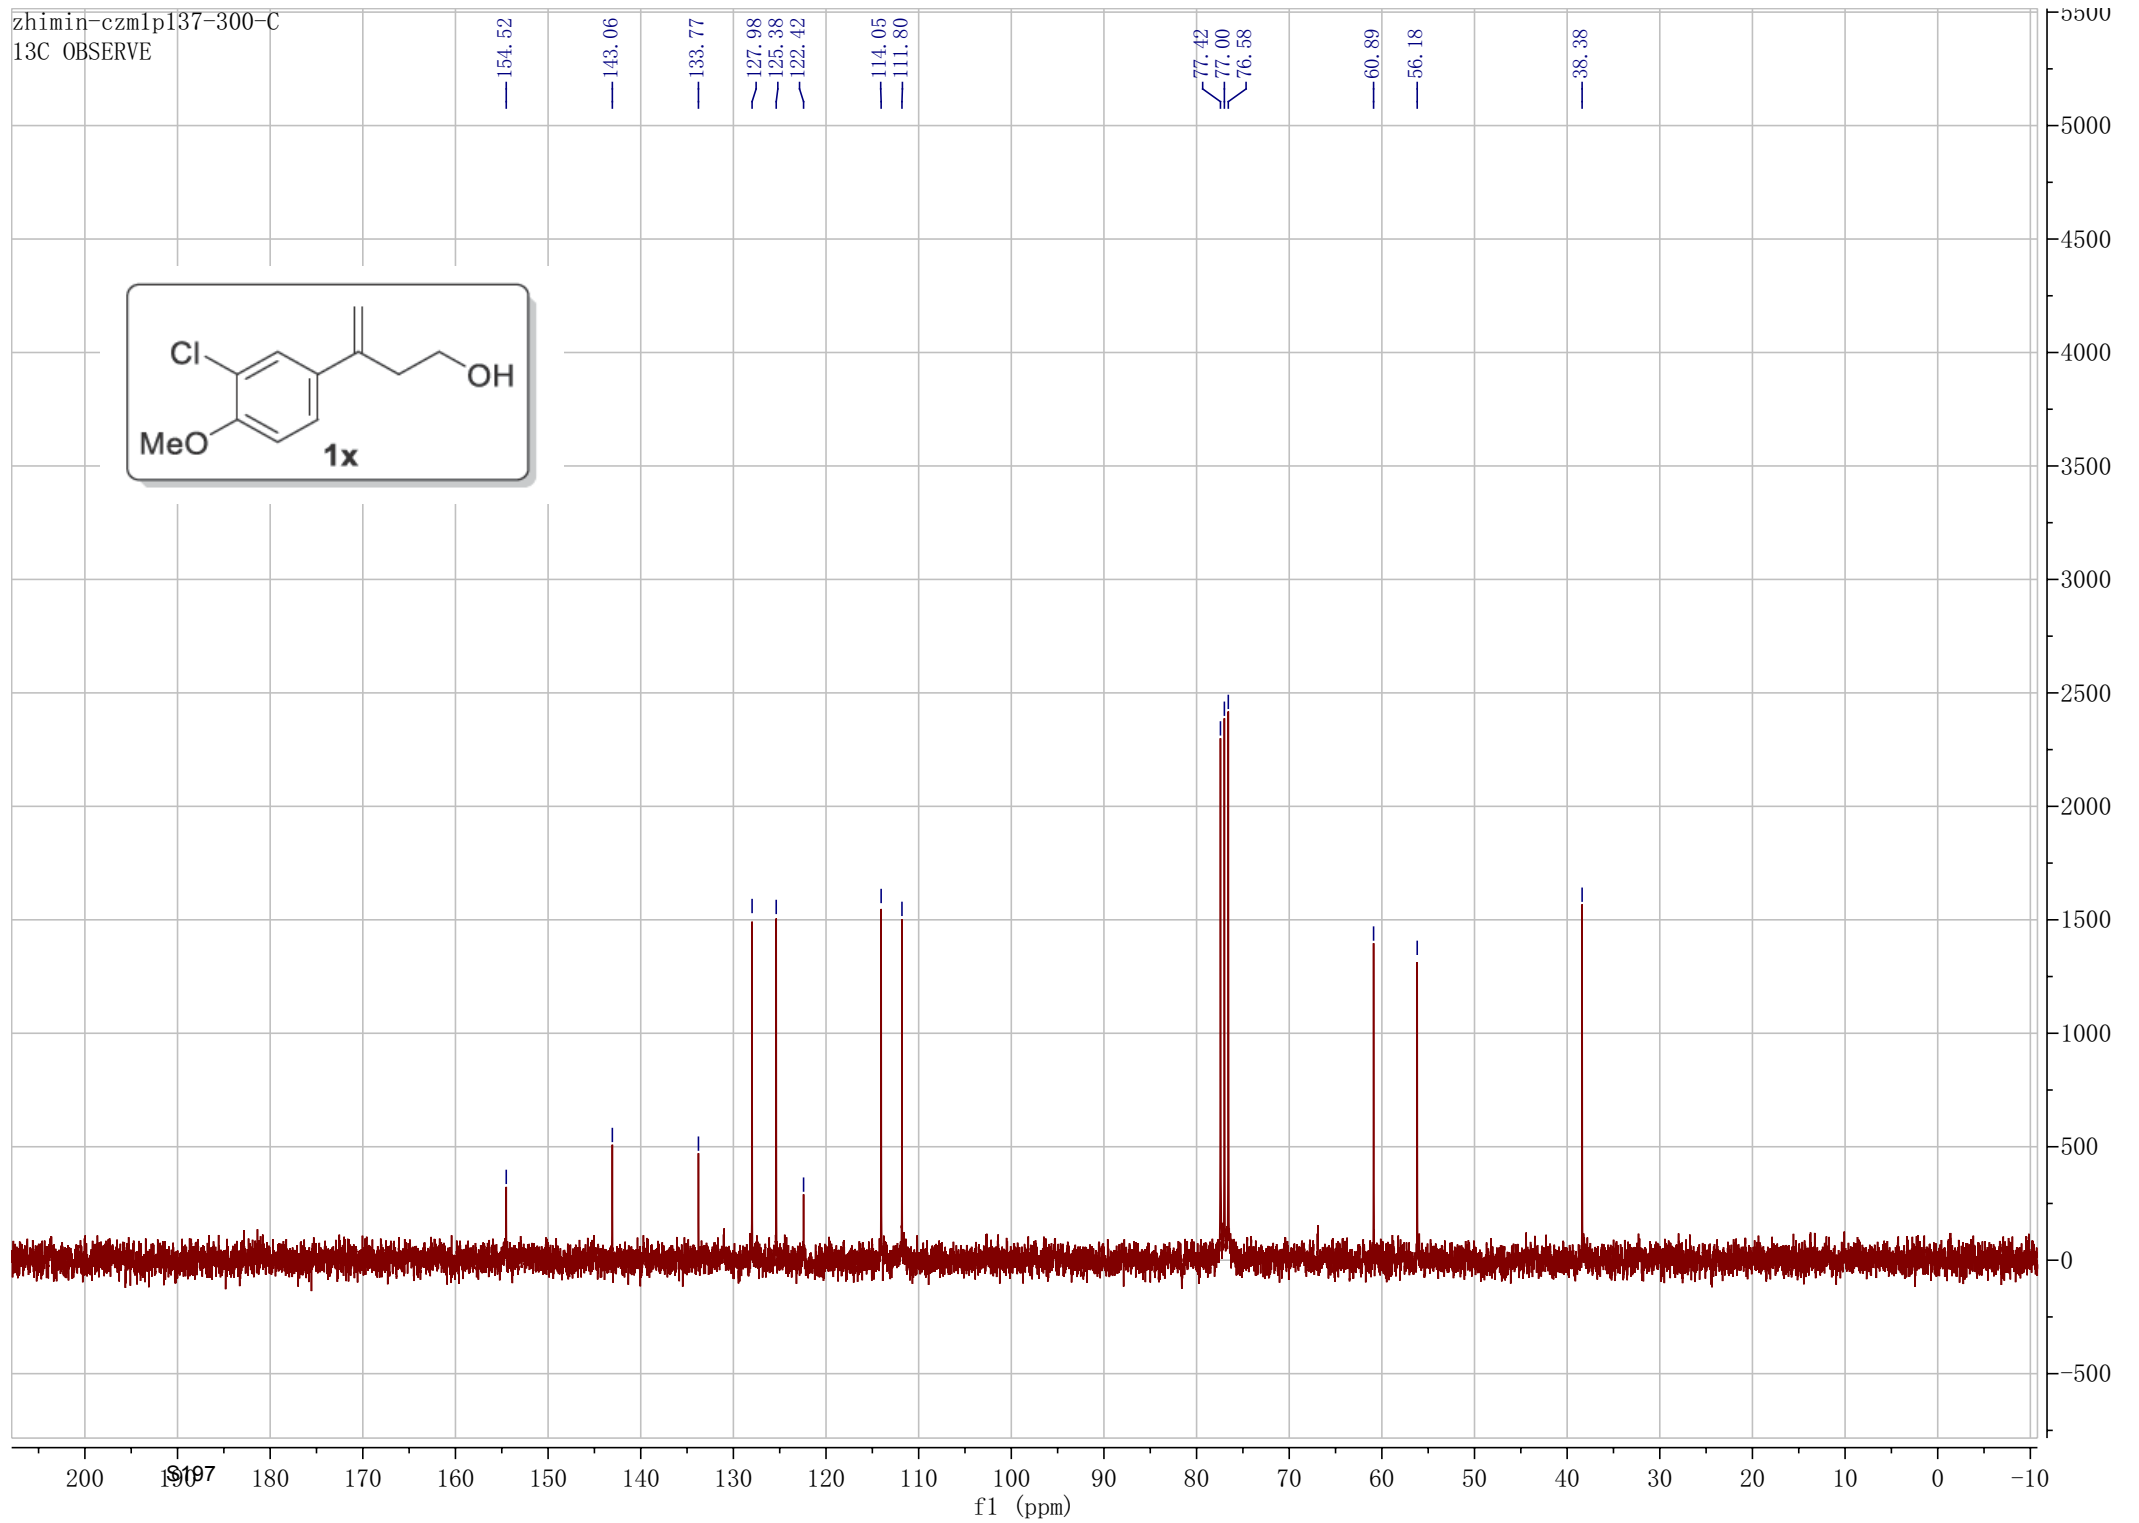

zhimin-czm371-500-H  
STANDARD PROTON PARAMETERS

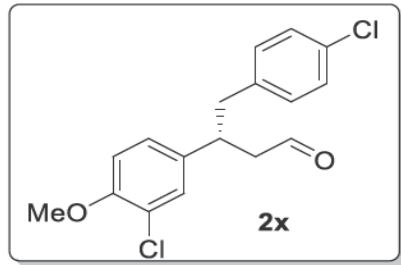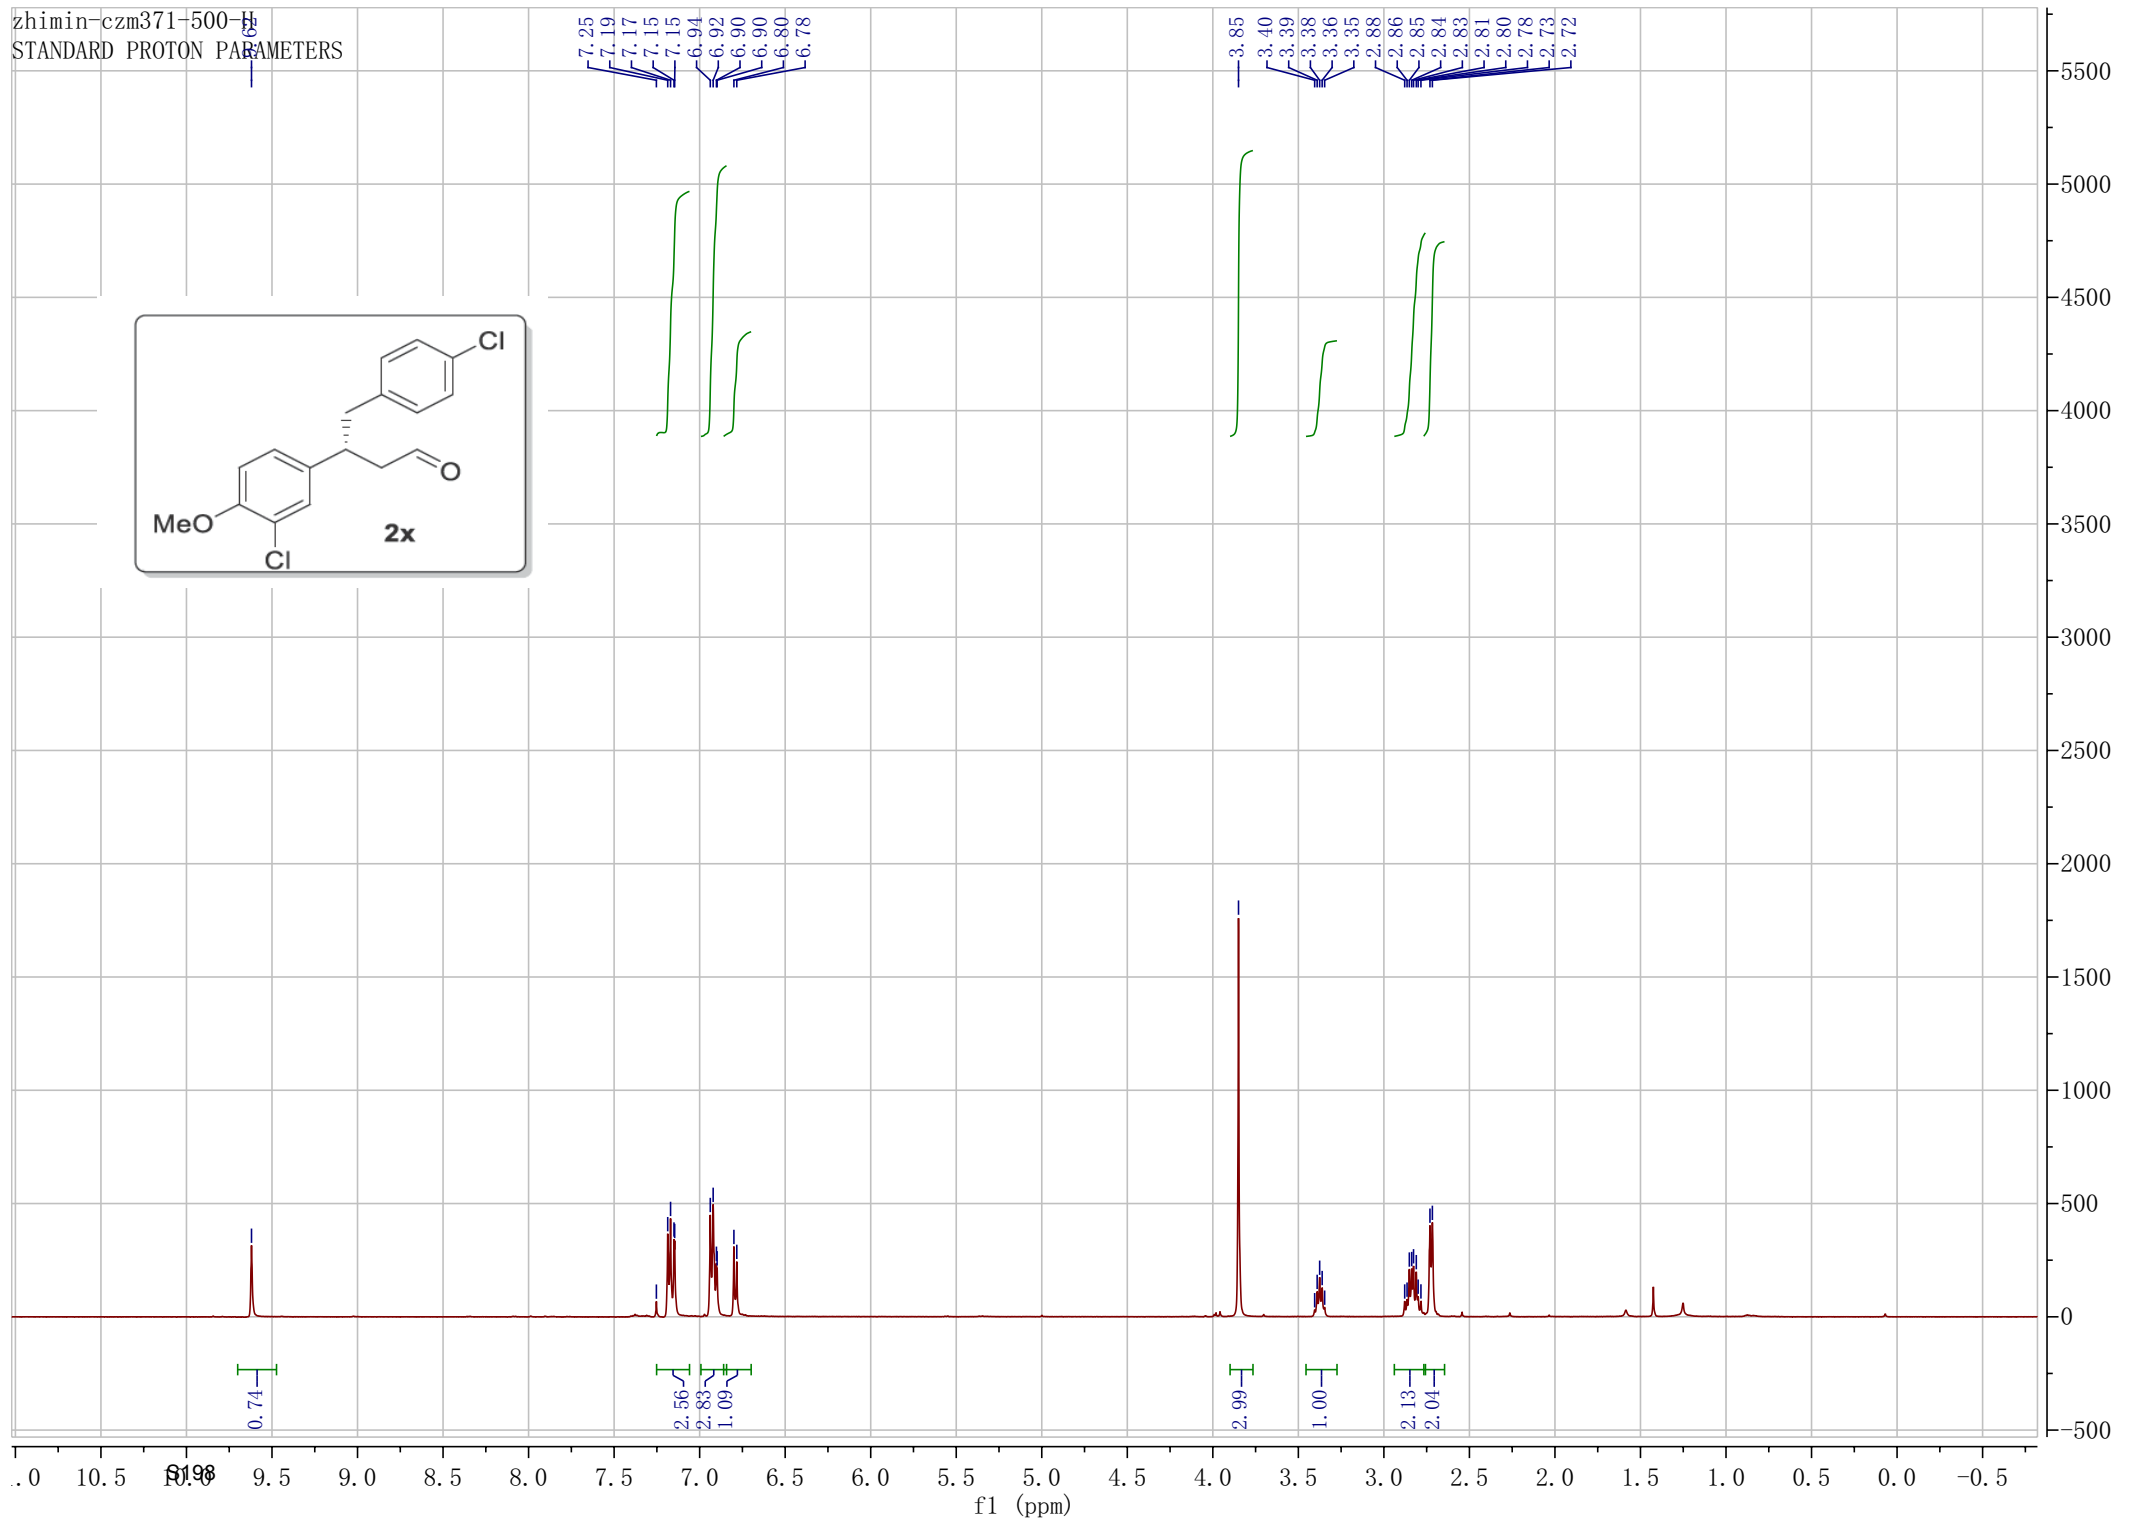

zhimin-czm371-CHO-500-C  
STANDARD CARBON PARAMETERS

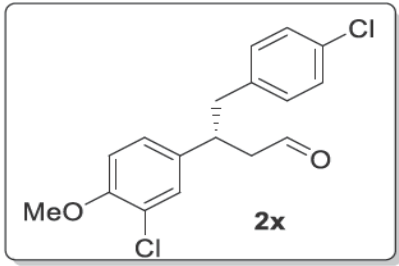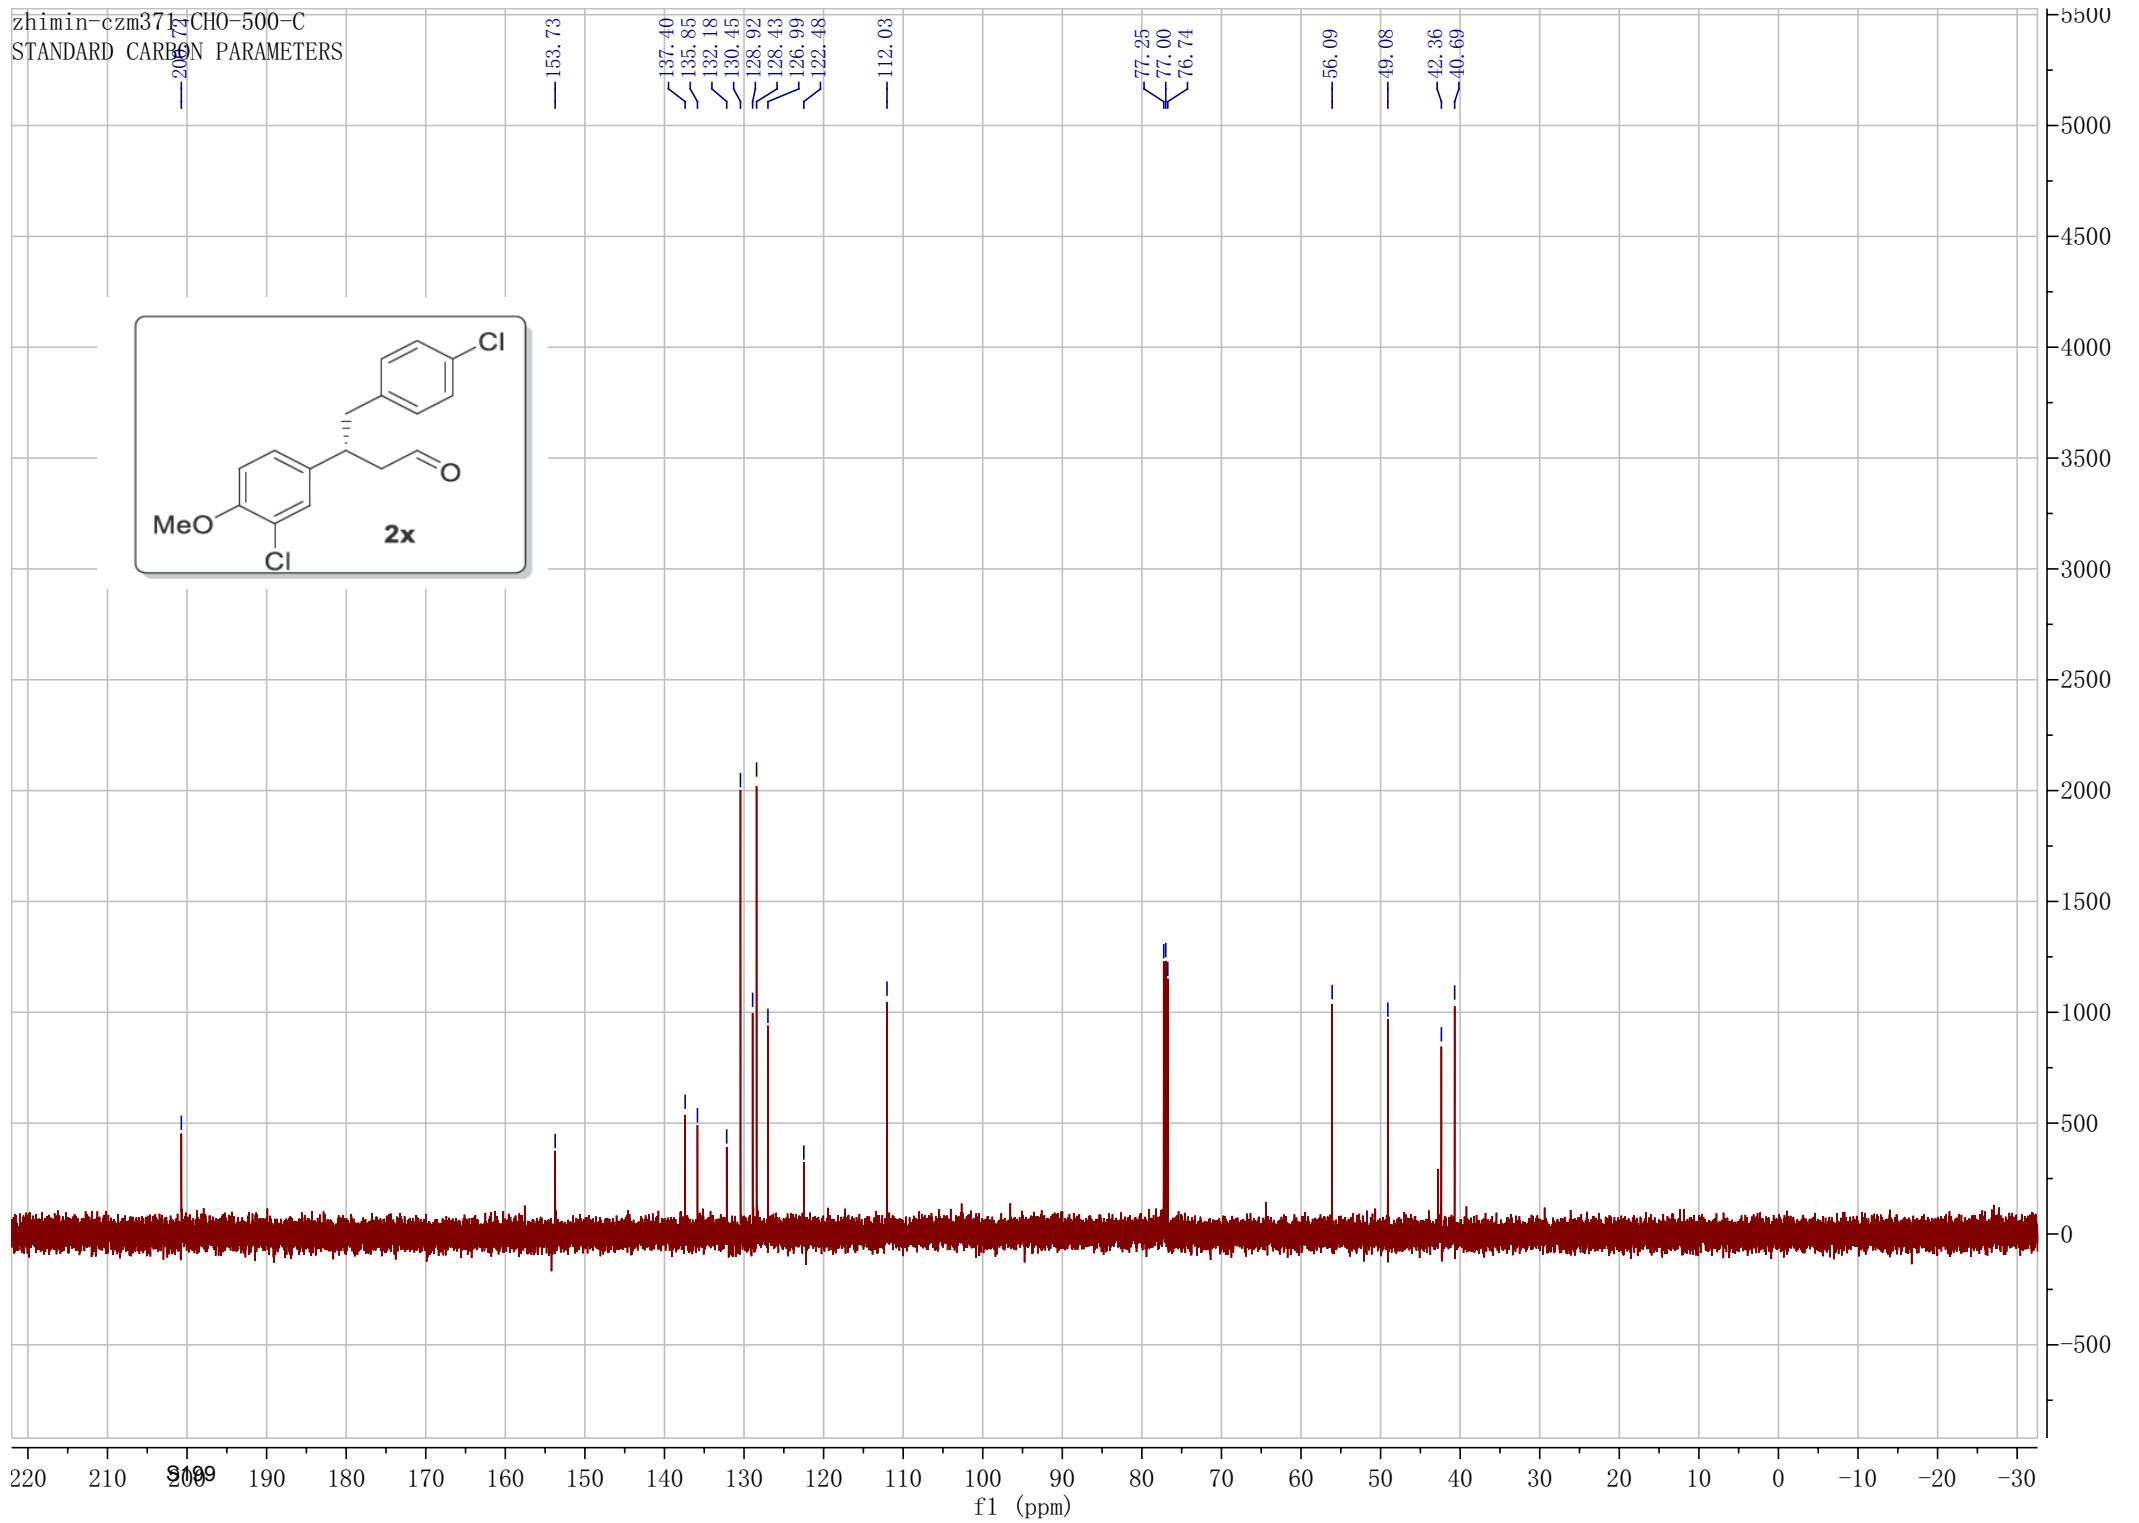

zhimin-czm371-OH-500-H

STANDARD PROTON PARAMETERS

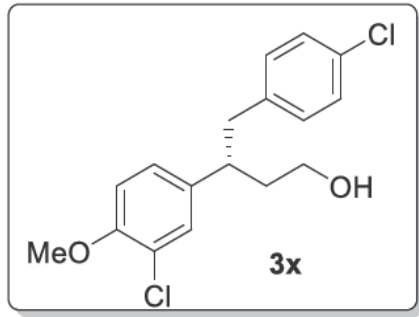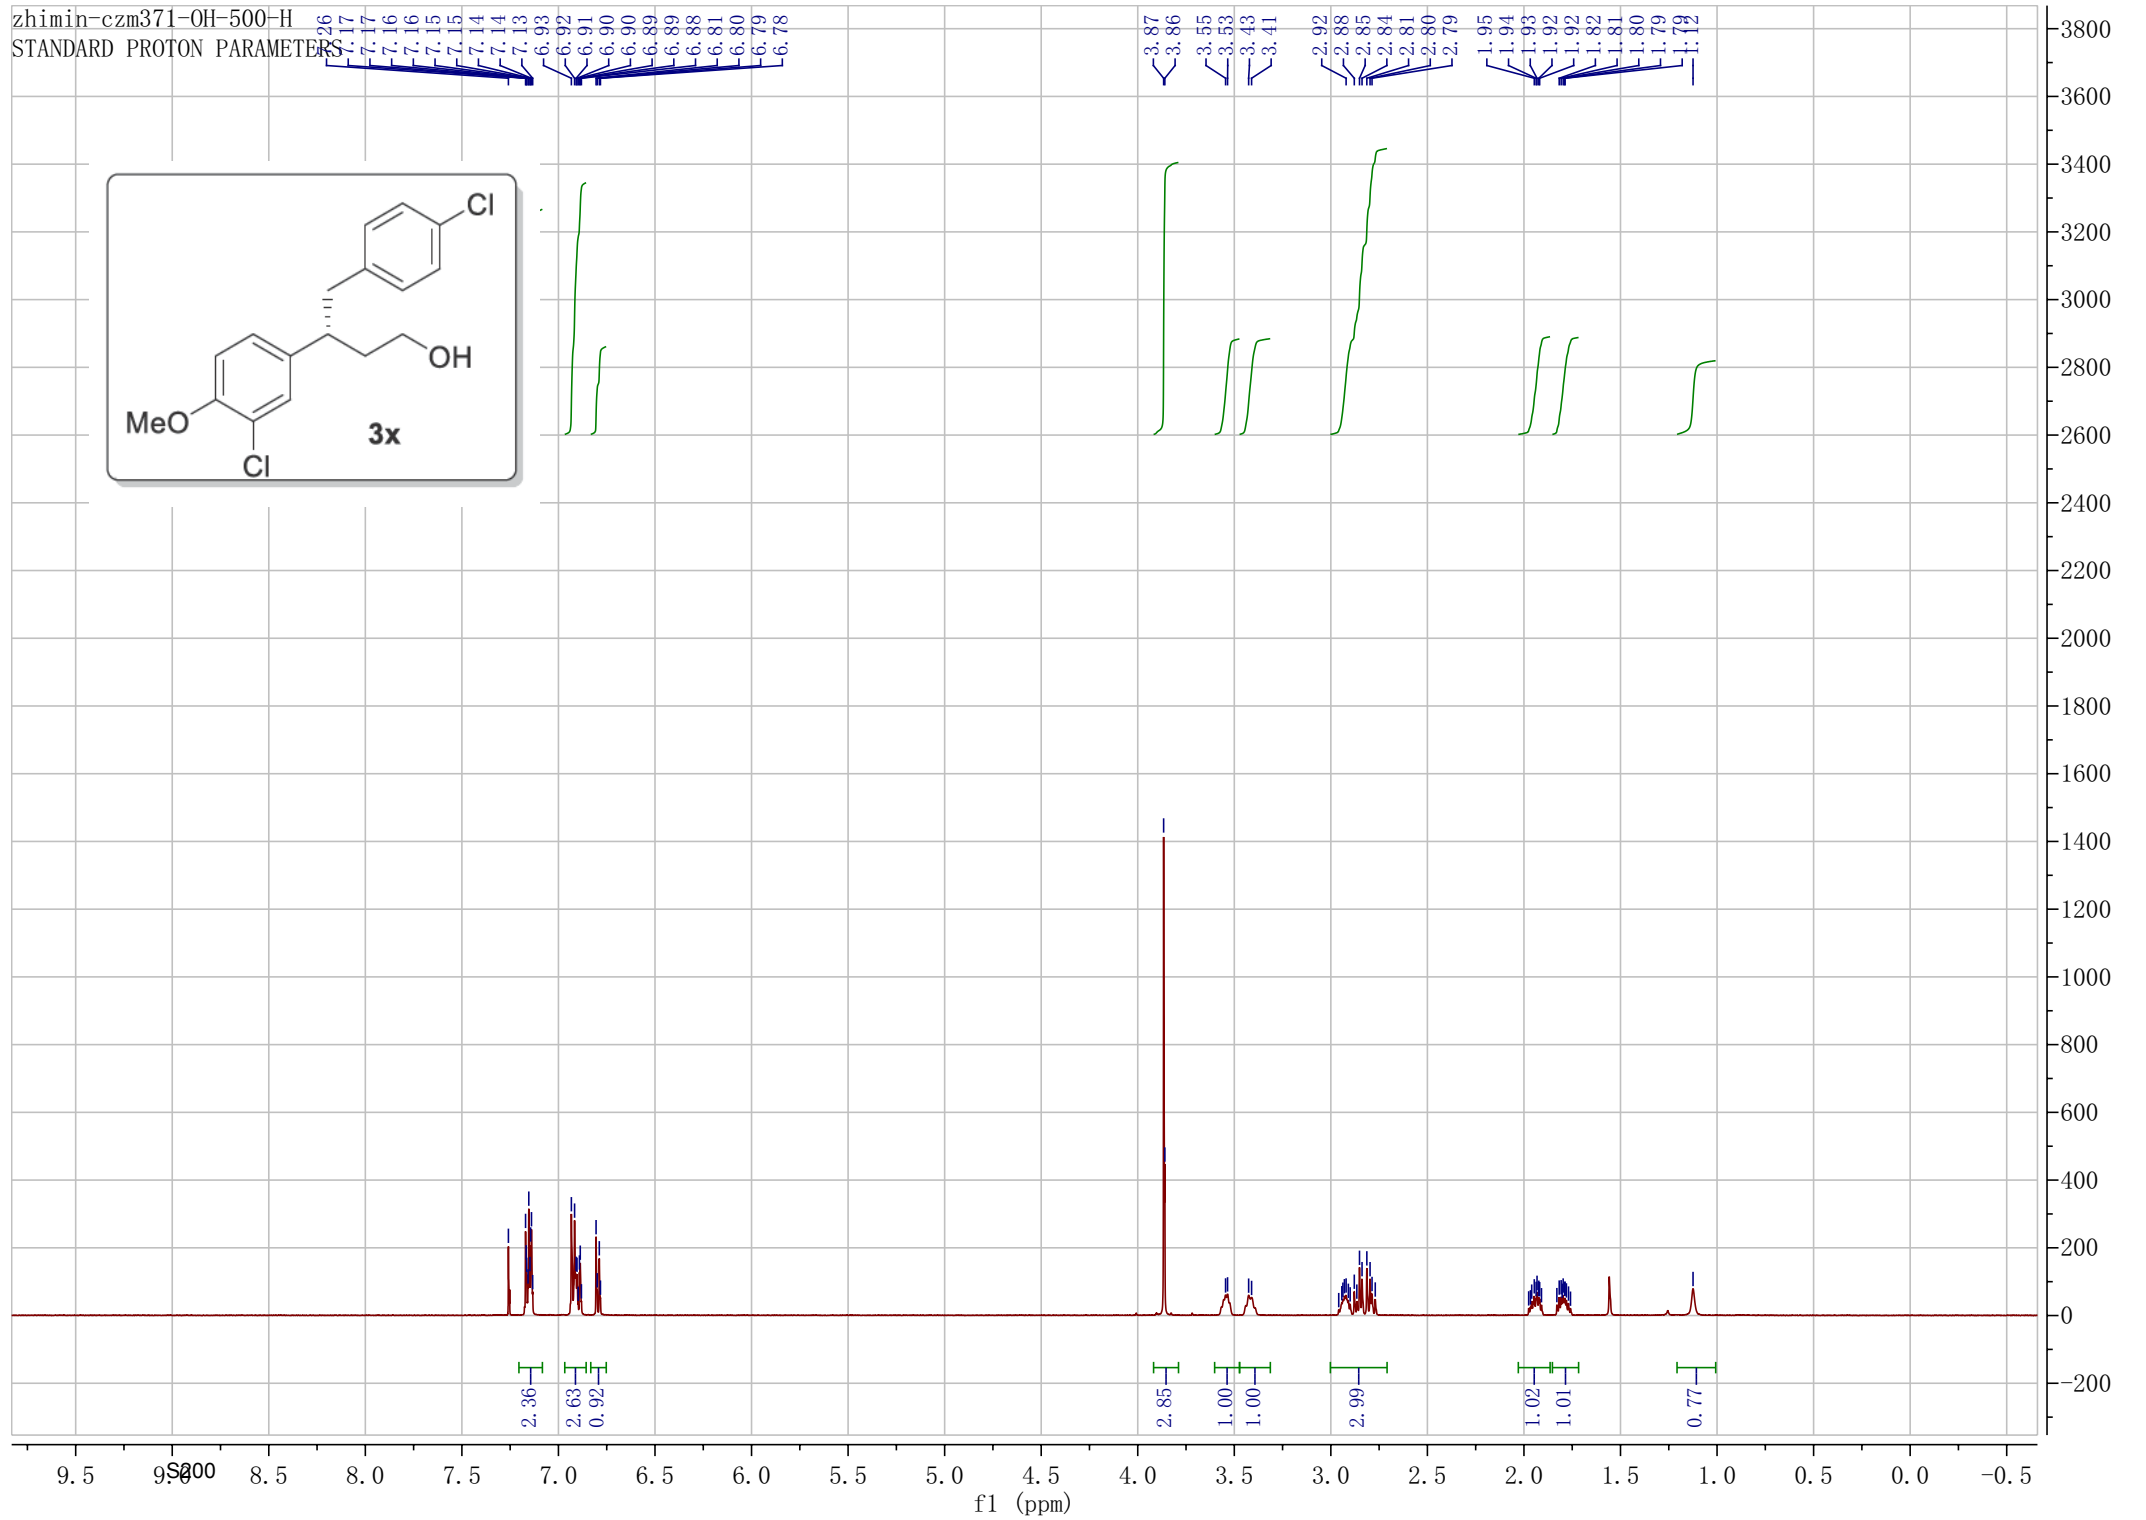

zhimin-czm371-OH-300-C  
13C OBSERVE

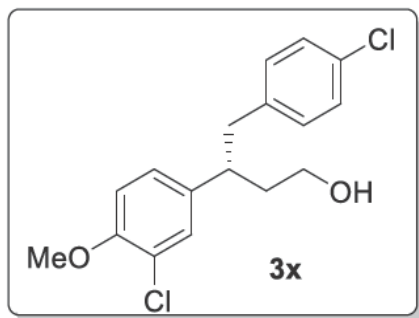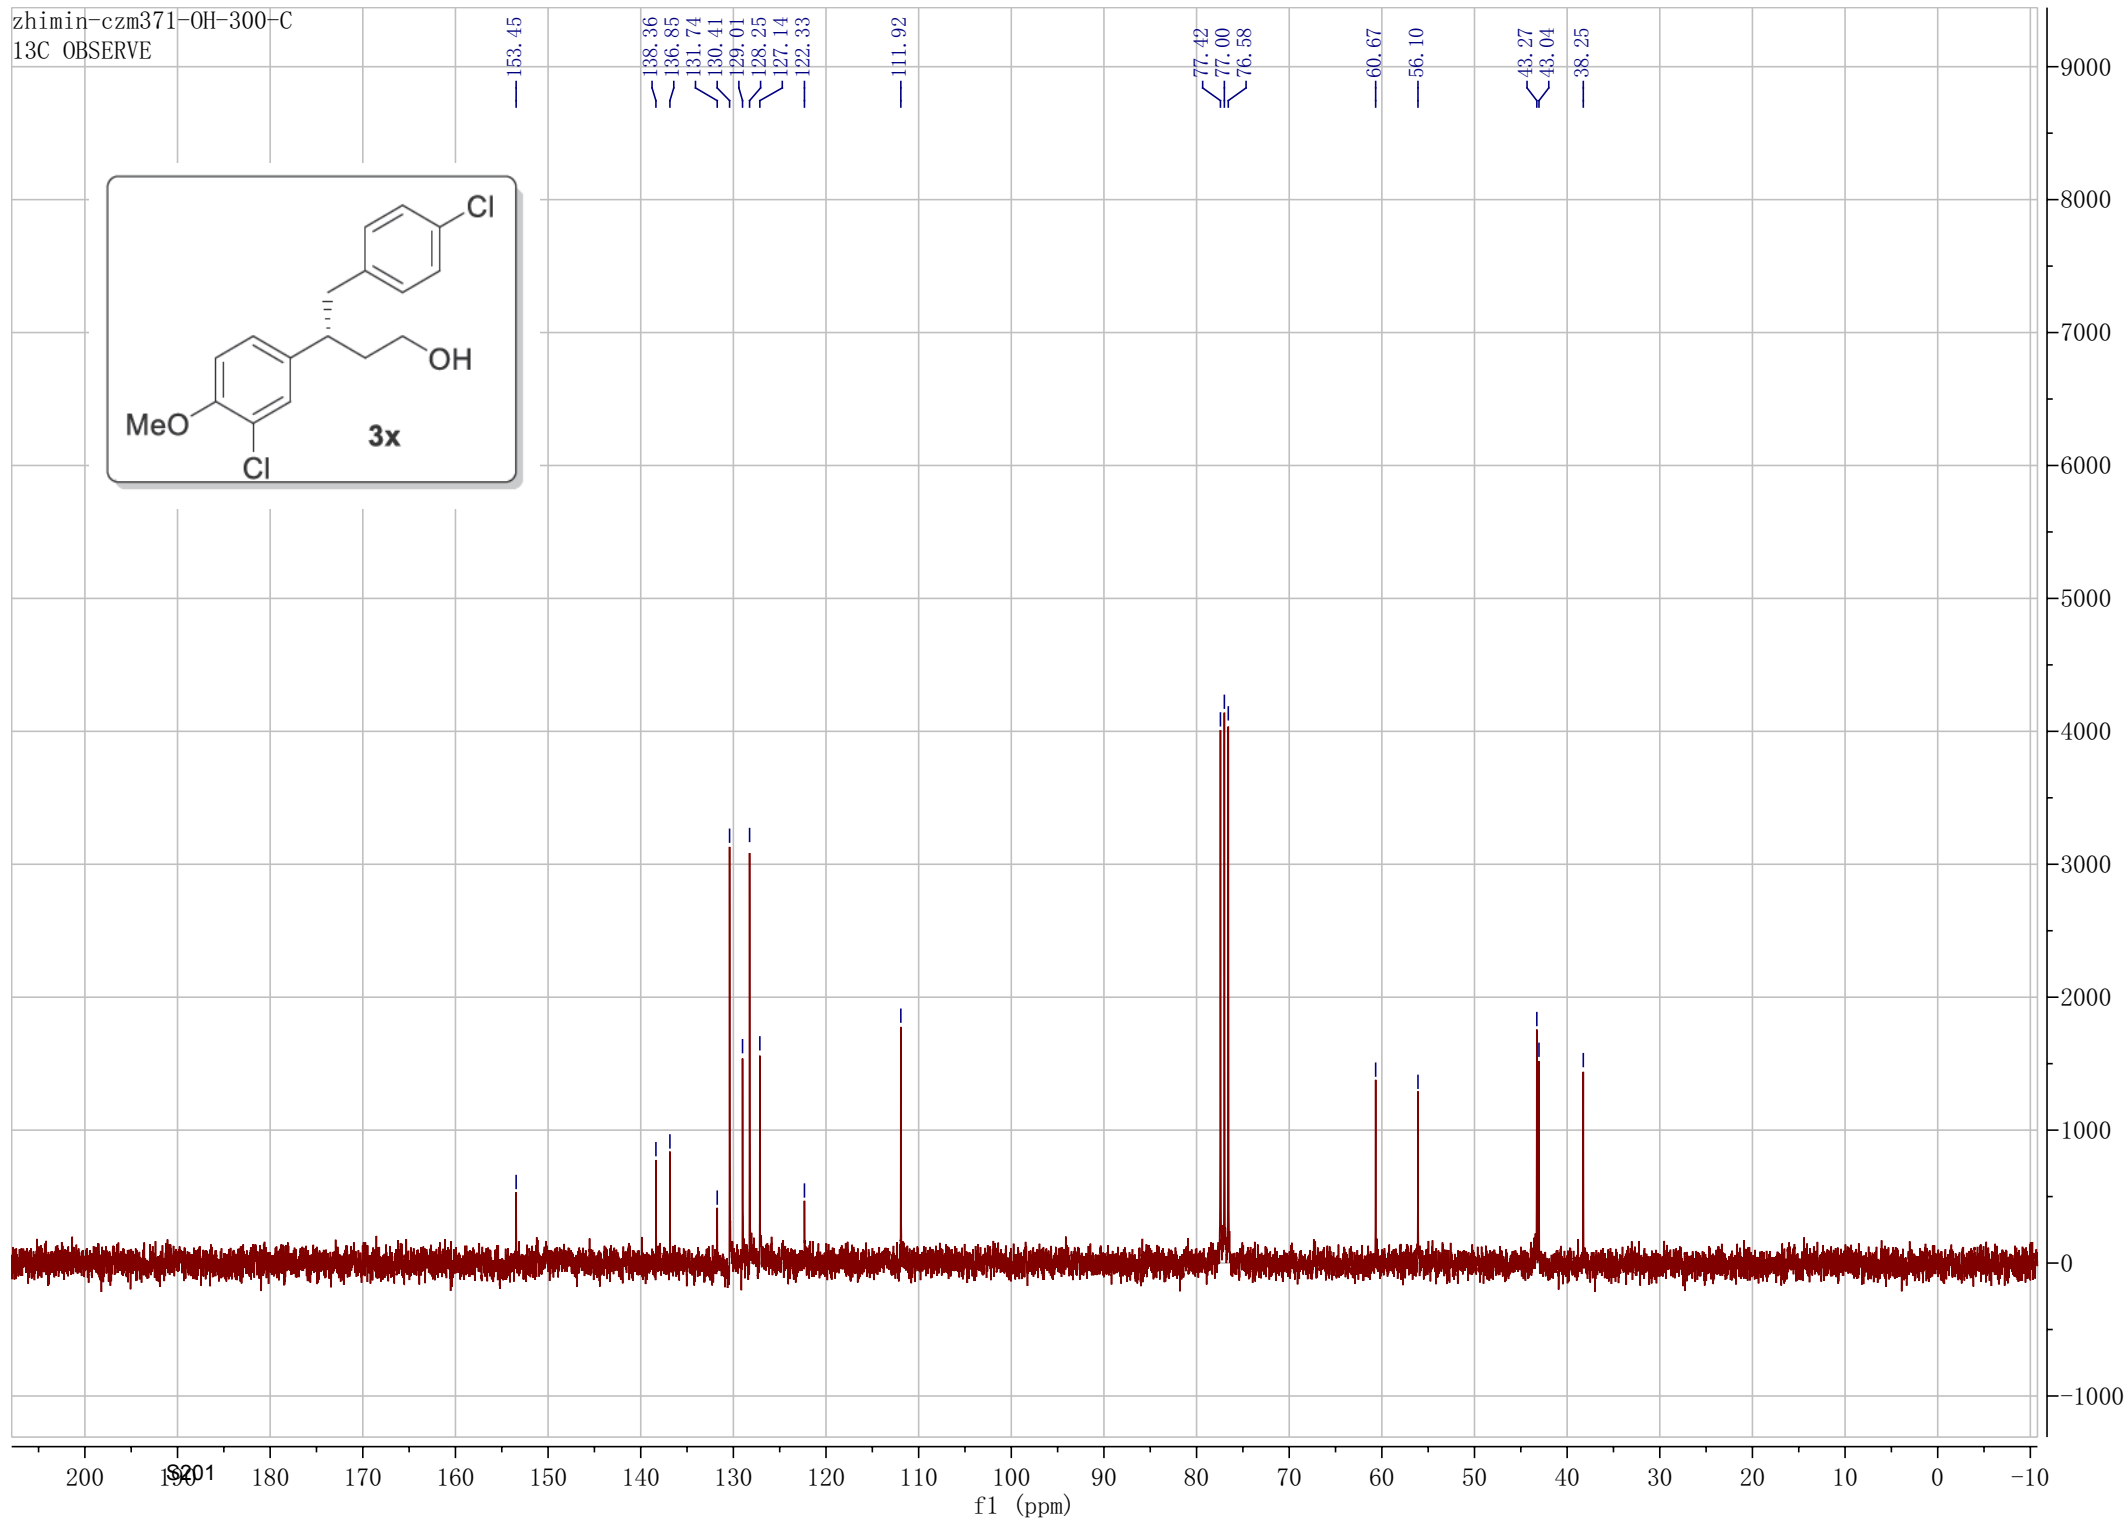

zhimin-czm353-CHO-500-H  
STANDARD PROTON PARAMETERS

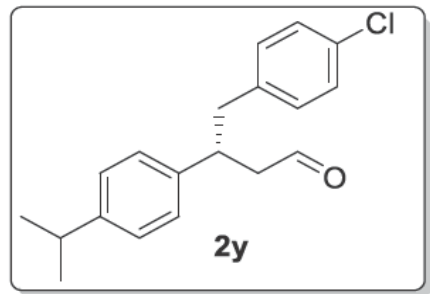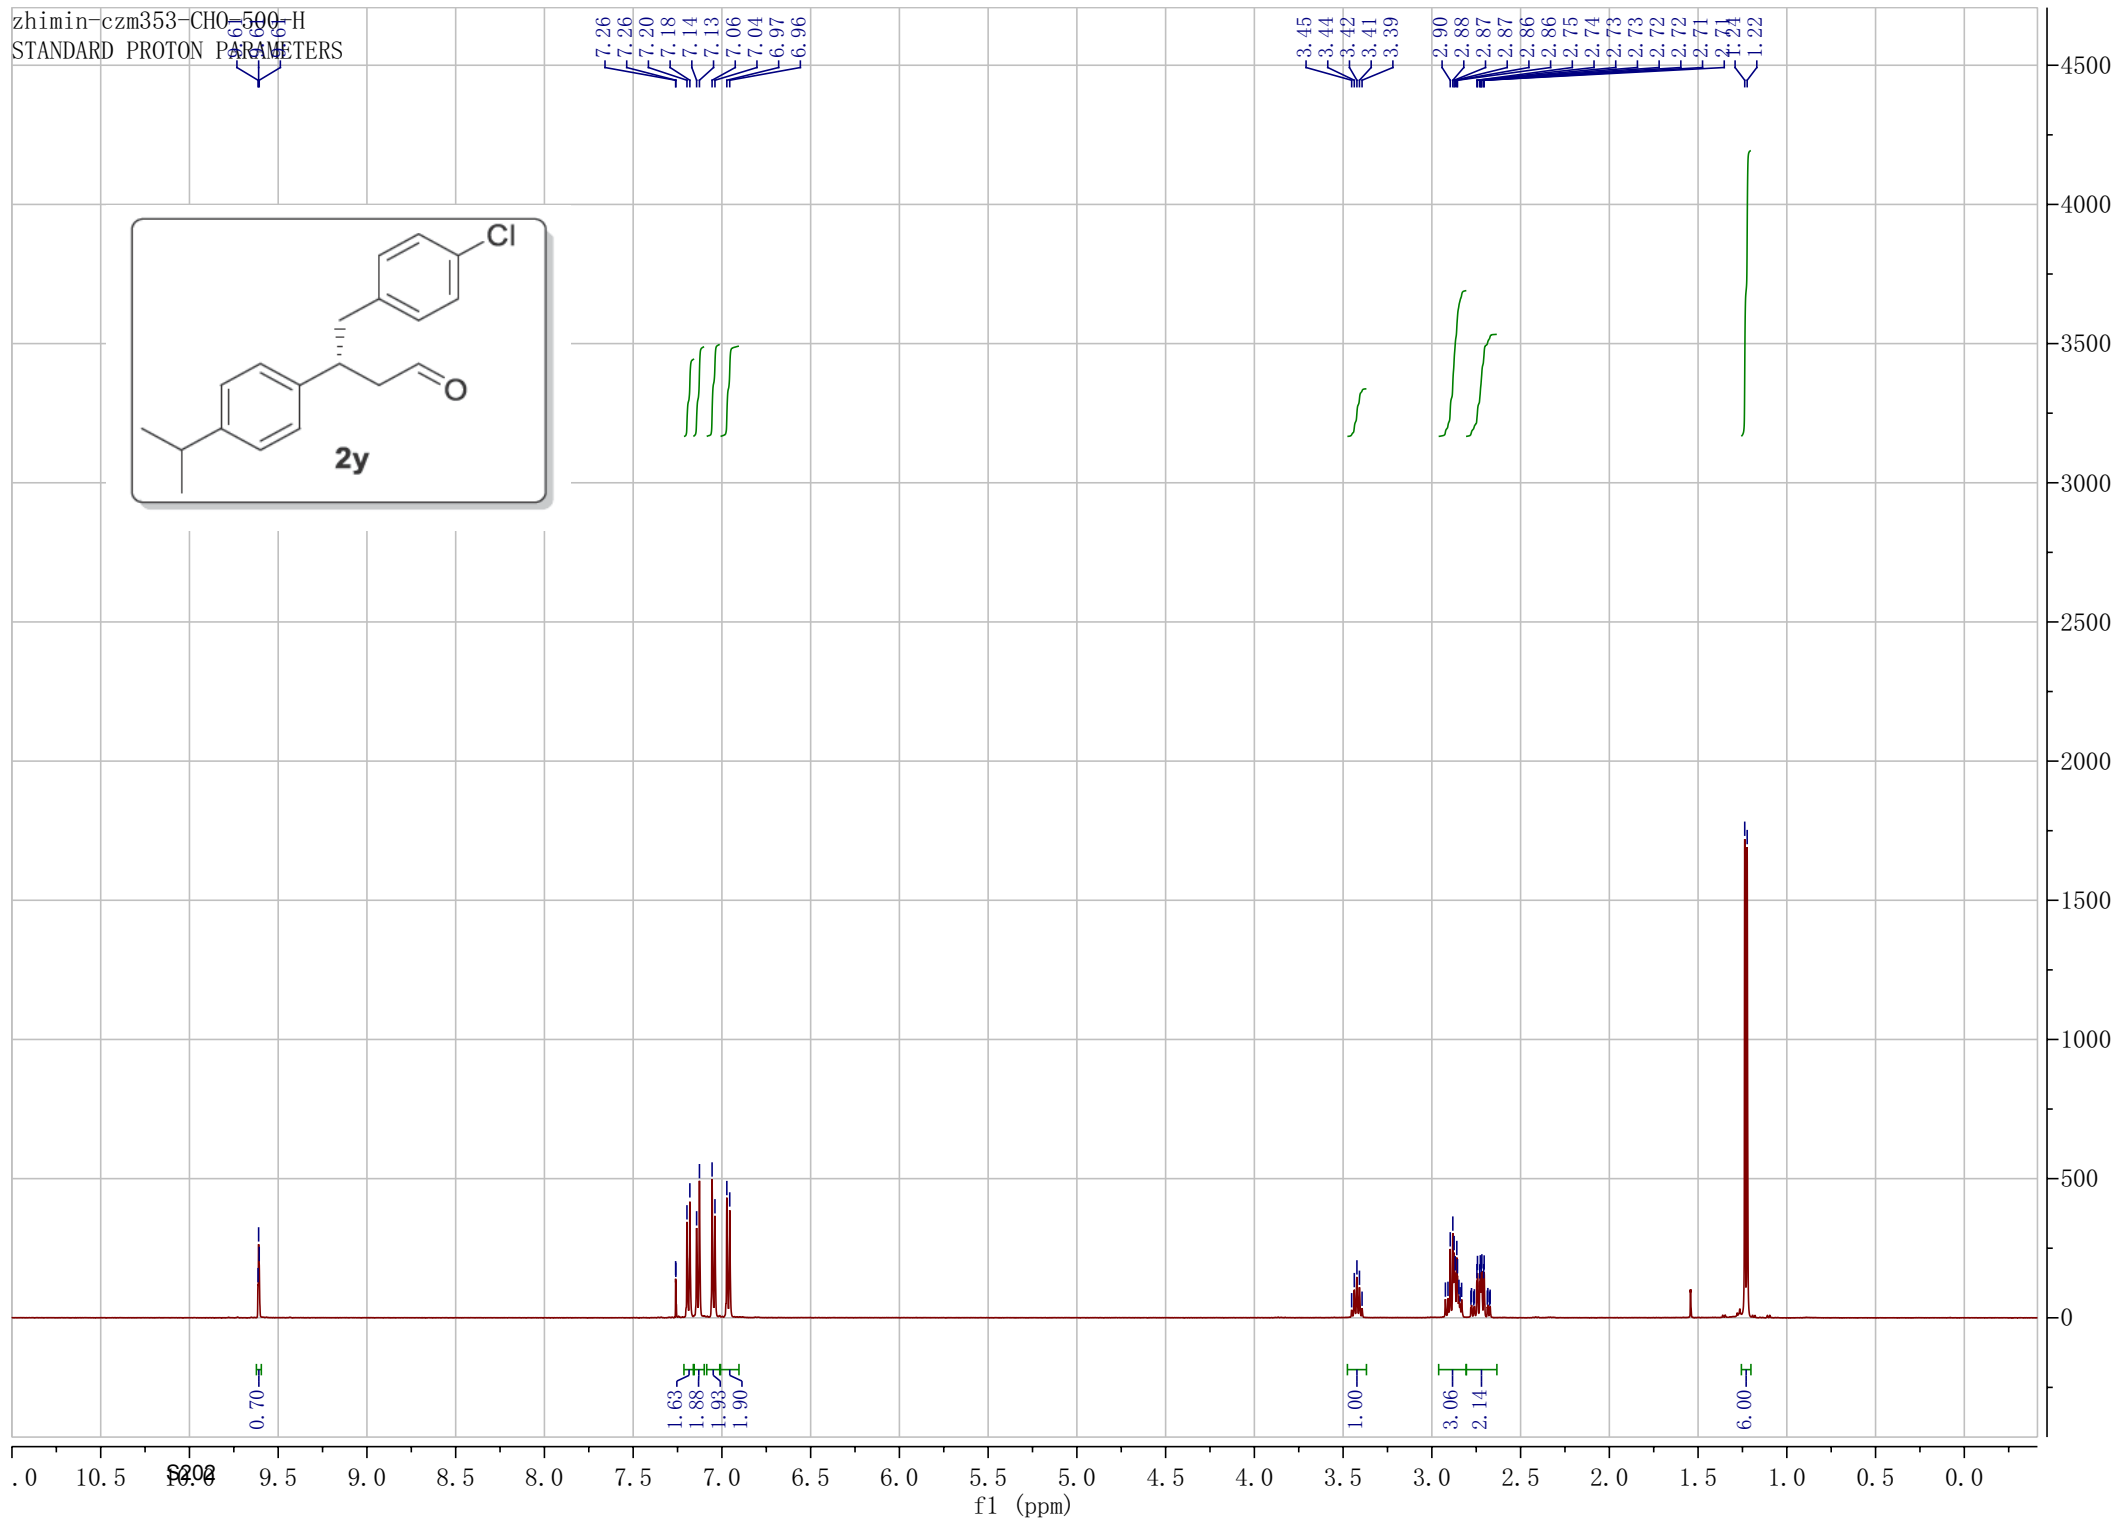



zhimin-czm353-CHO-C-300  
13C OBSERVE

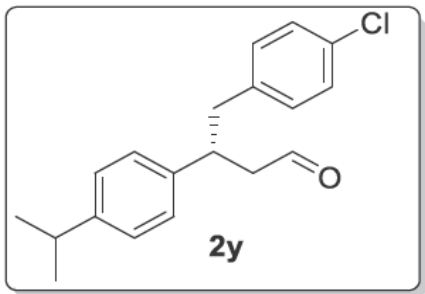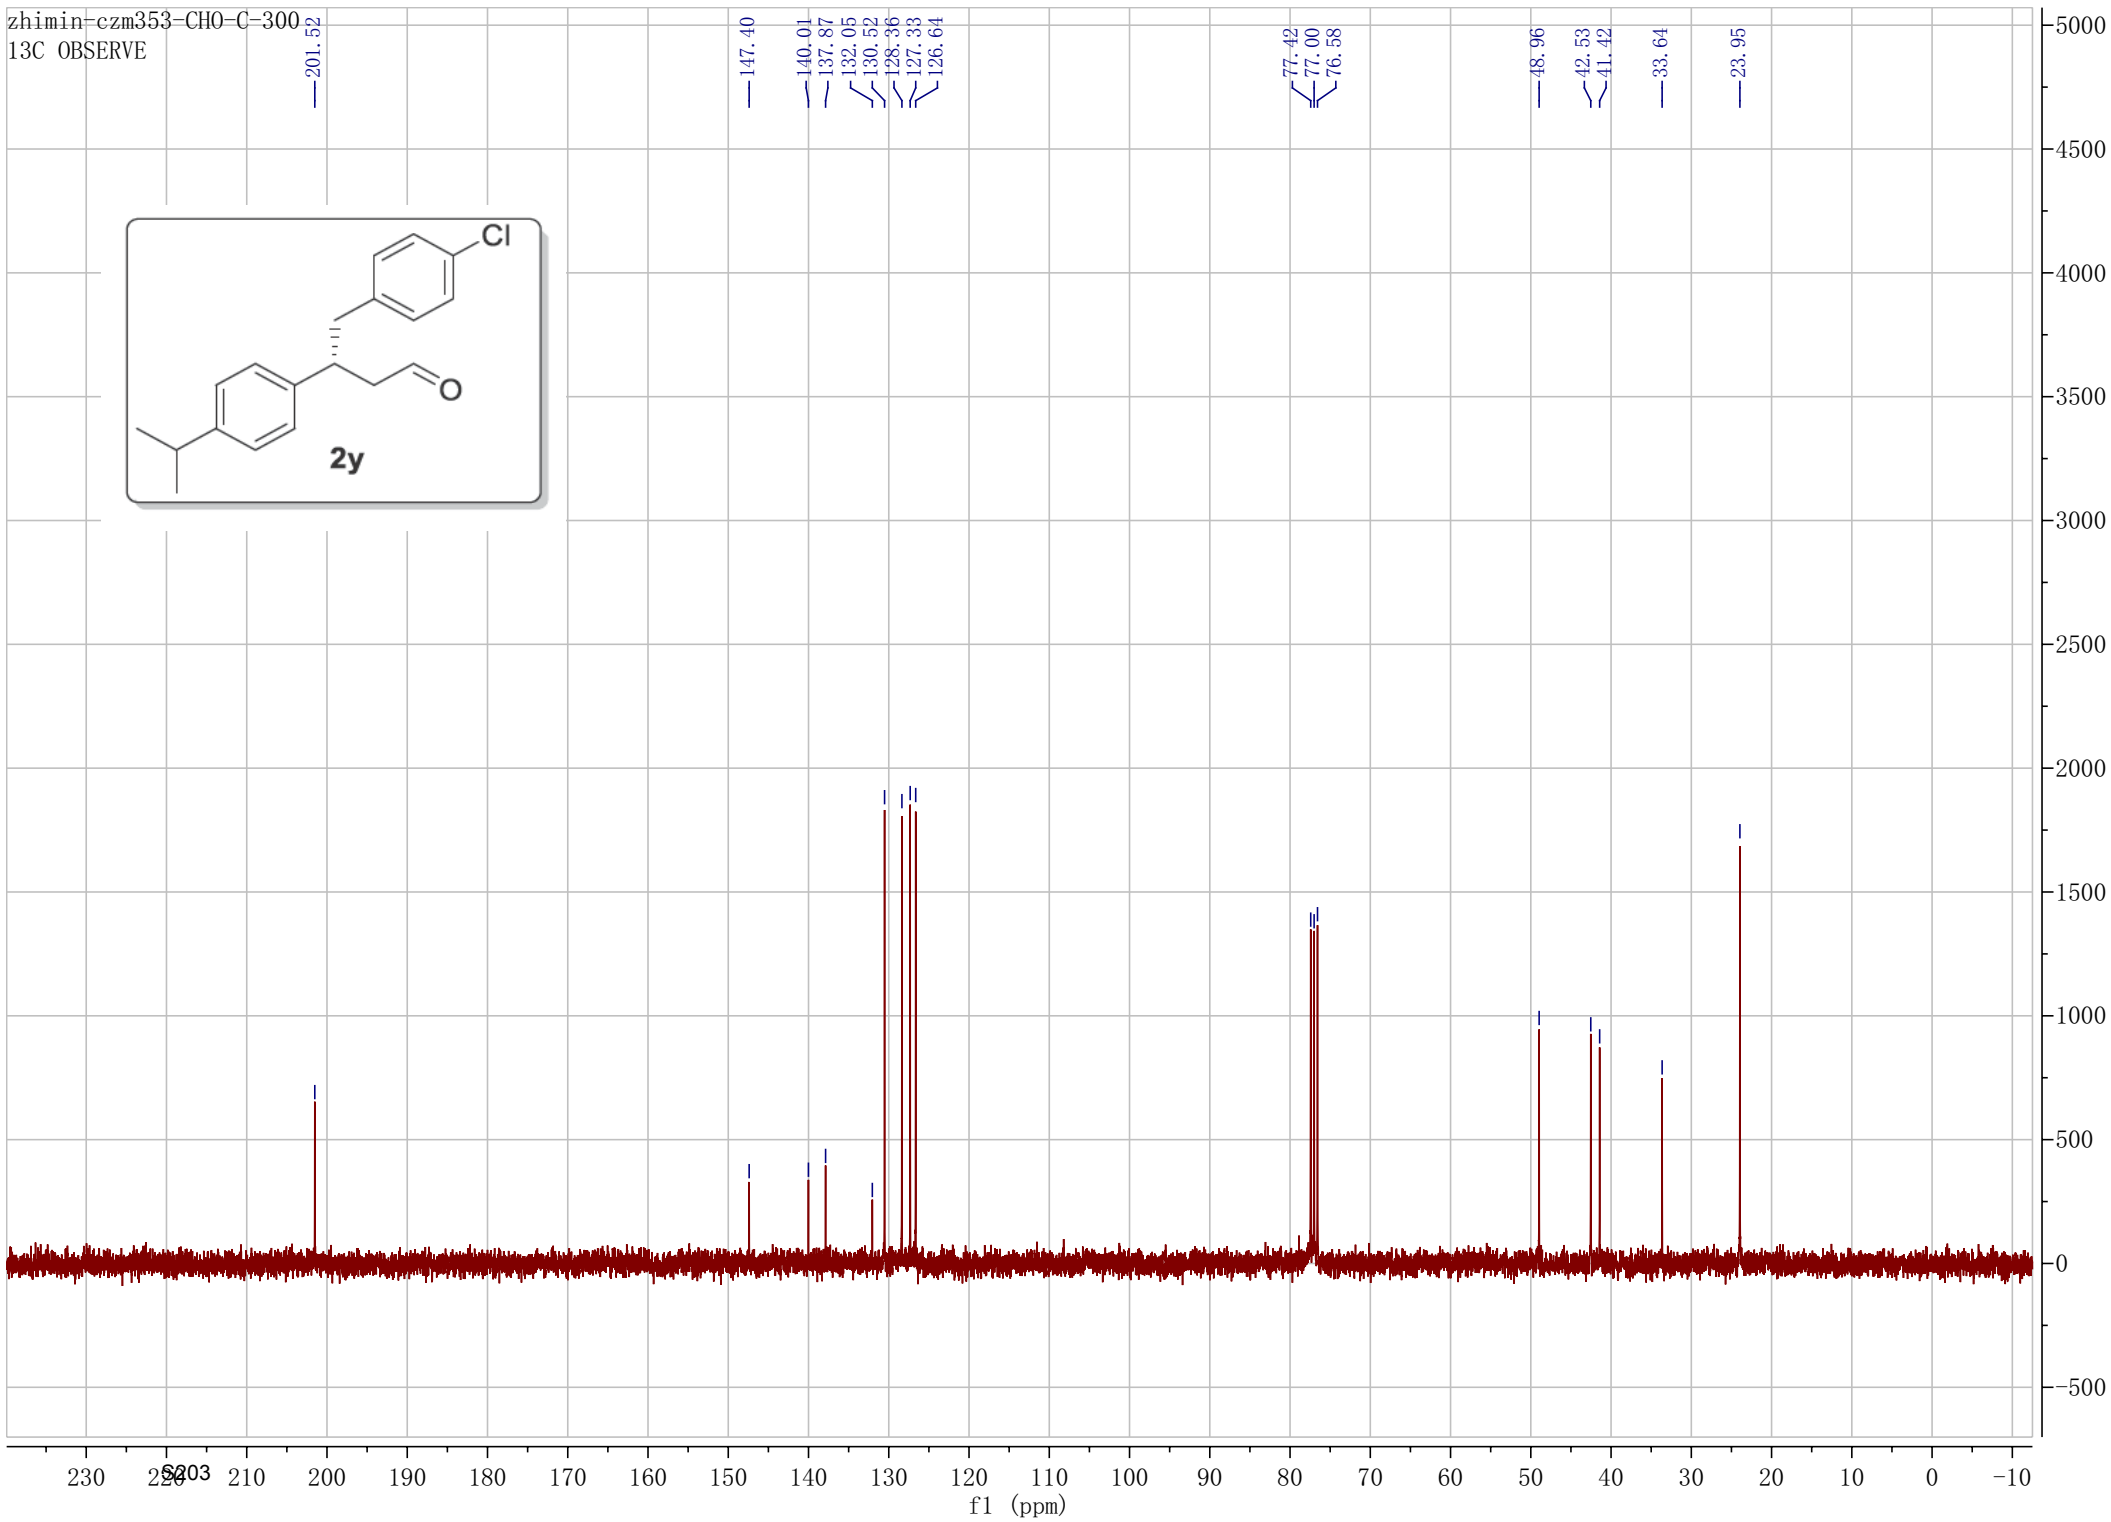

zhimin-czm208-OH-500-H  
STANDARD PROTON PARAMETERS

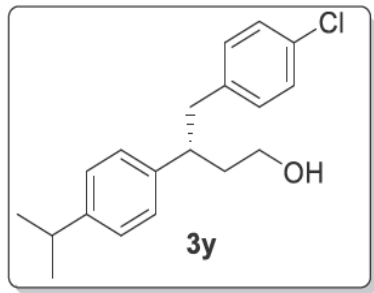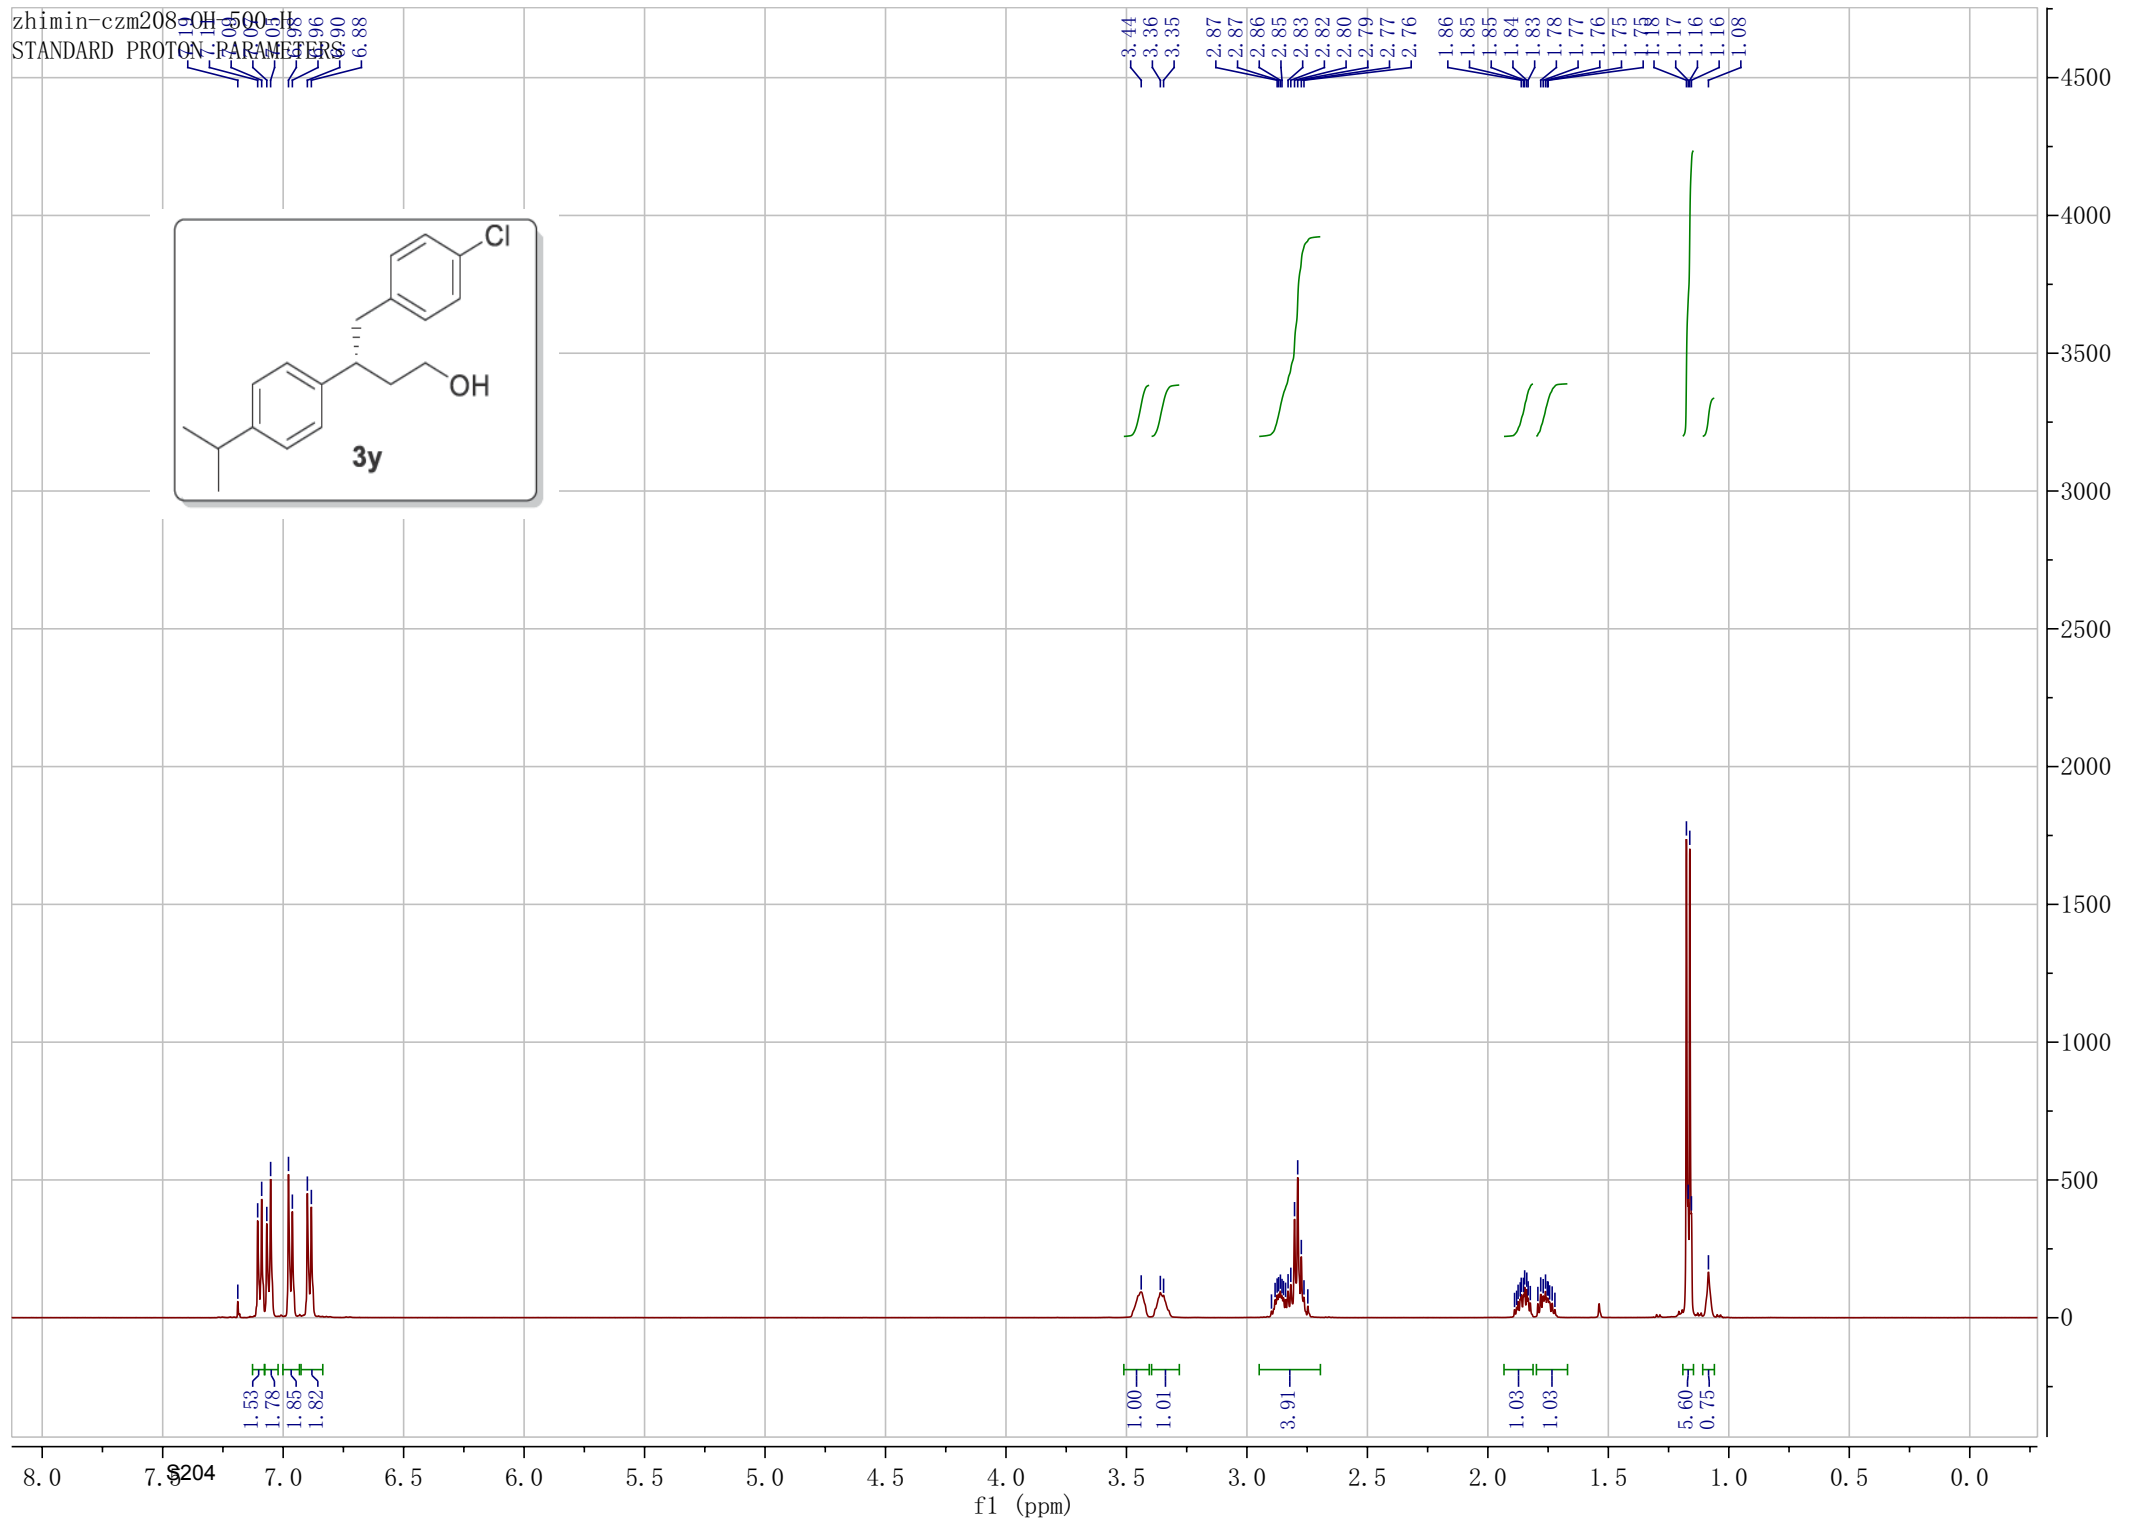

zhimin-czm208-OH-300-C  
13C OBSERVE

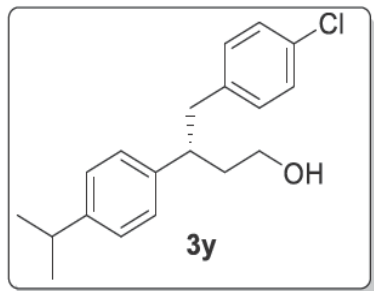

146.96  
141.05  
138.88  
131.56  
130.45  
128.14  
127.44  
126.46

77.42  
77.00  
76.58

61.00

43.90  
43.10

38.11

33.61

23.98

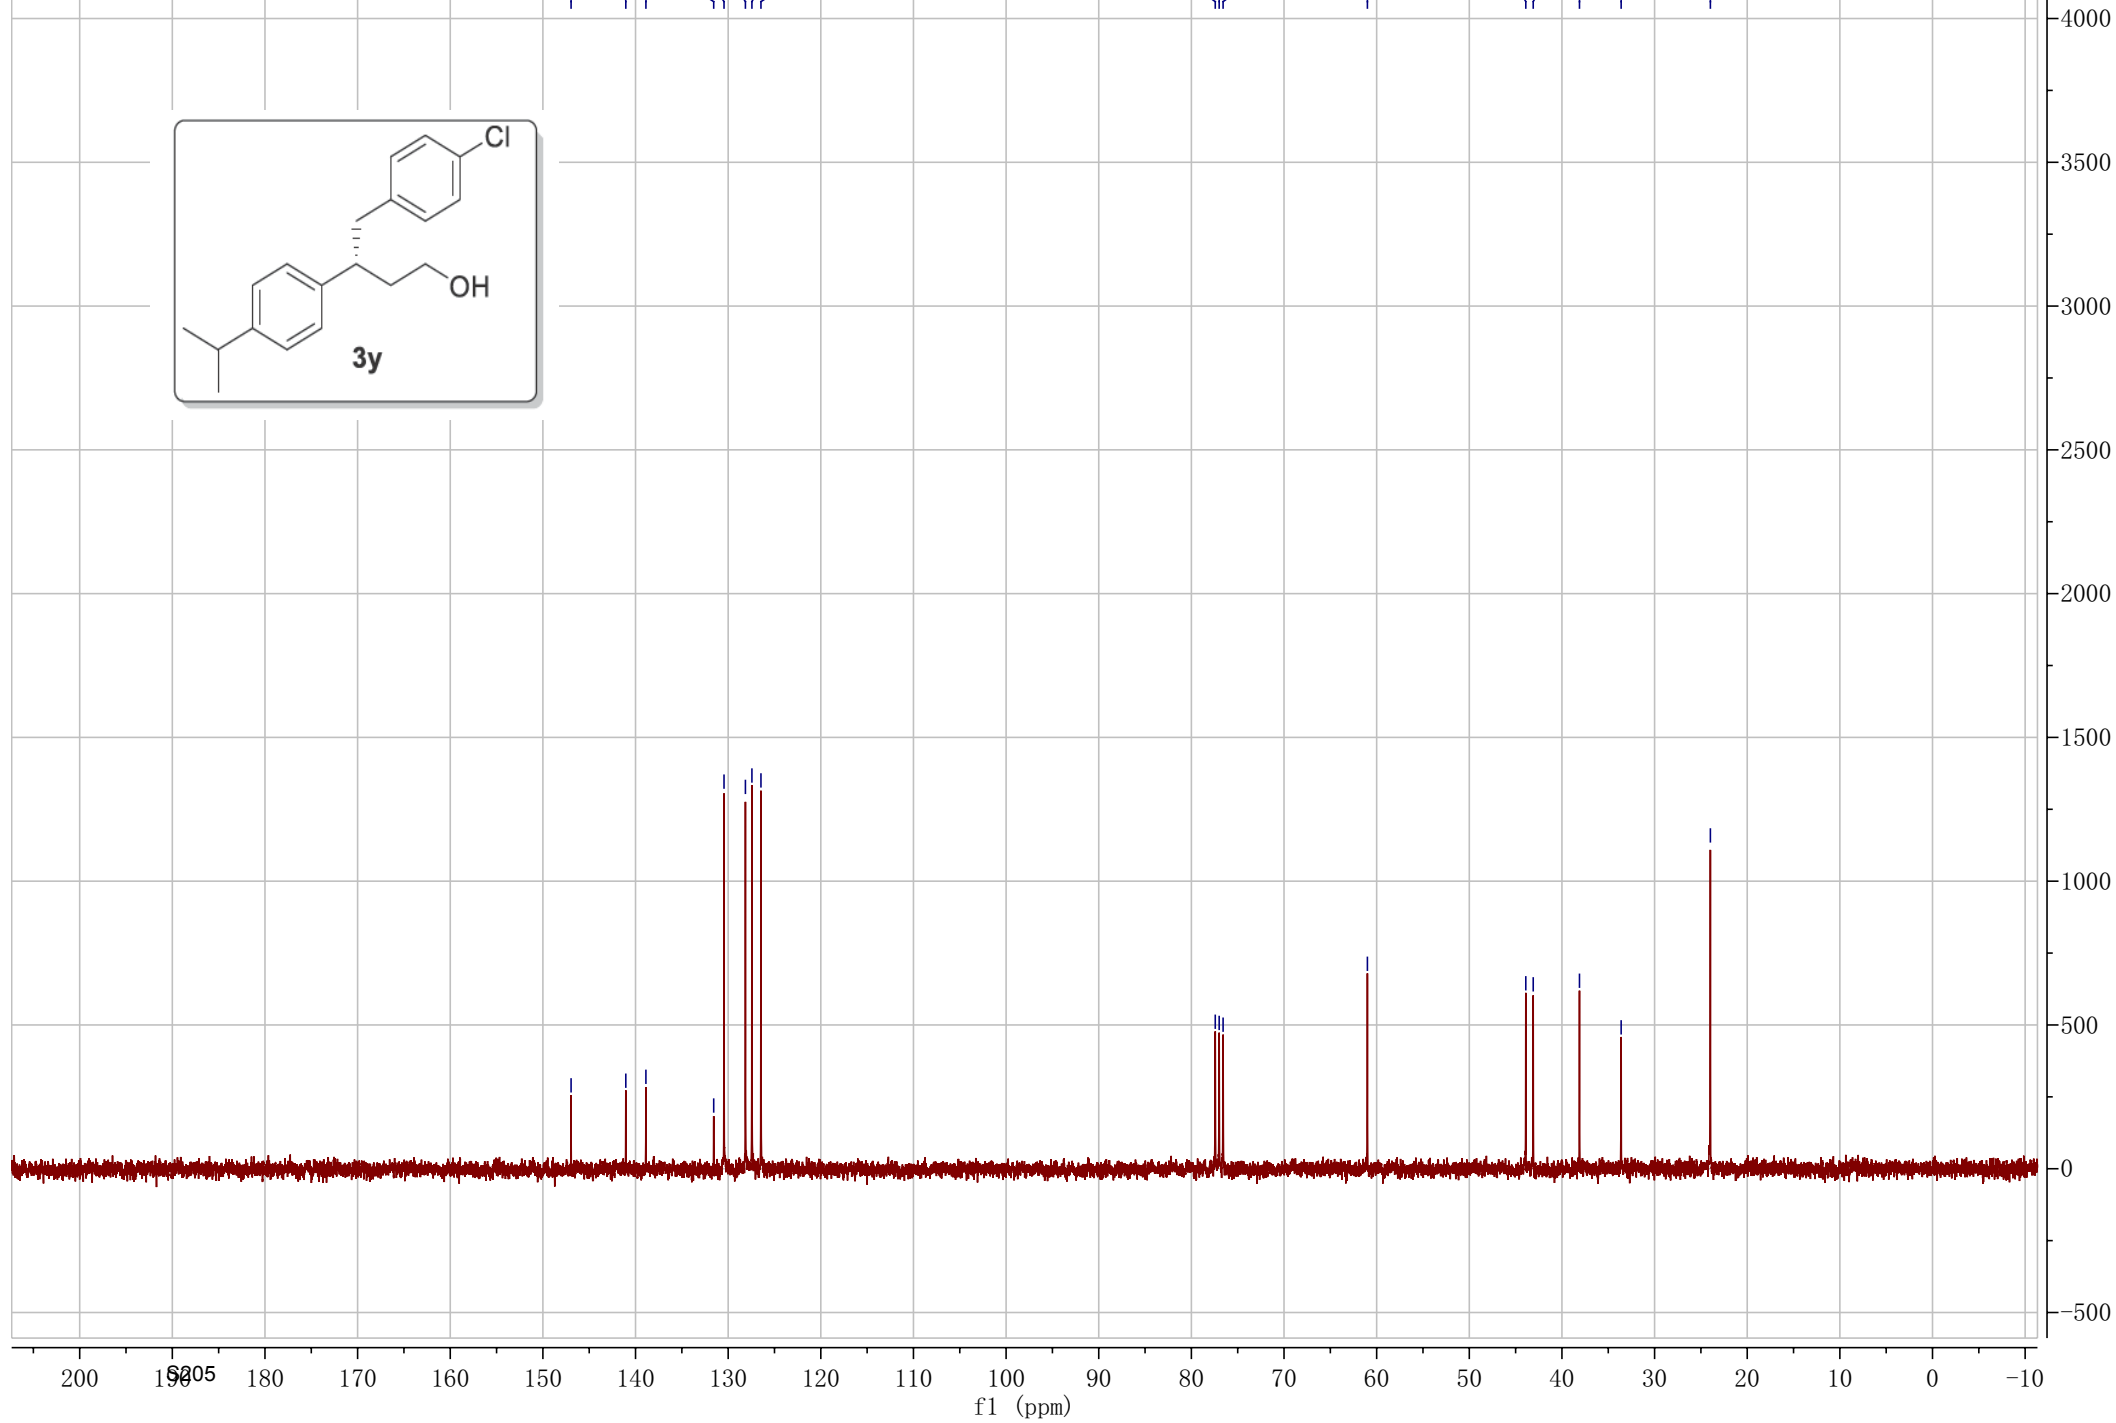

zhimin-czm351-500-H  
STANDARD PROTON PARAMETERS

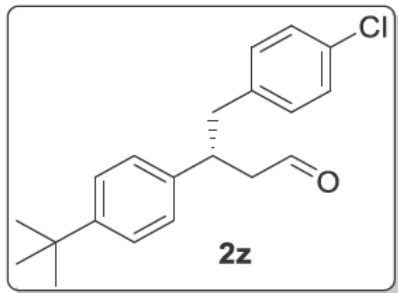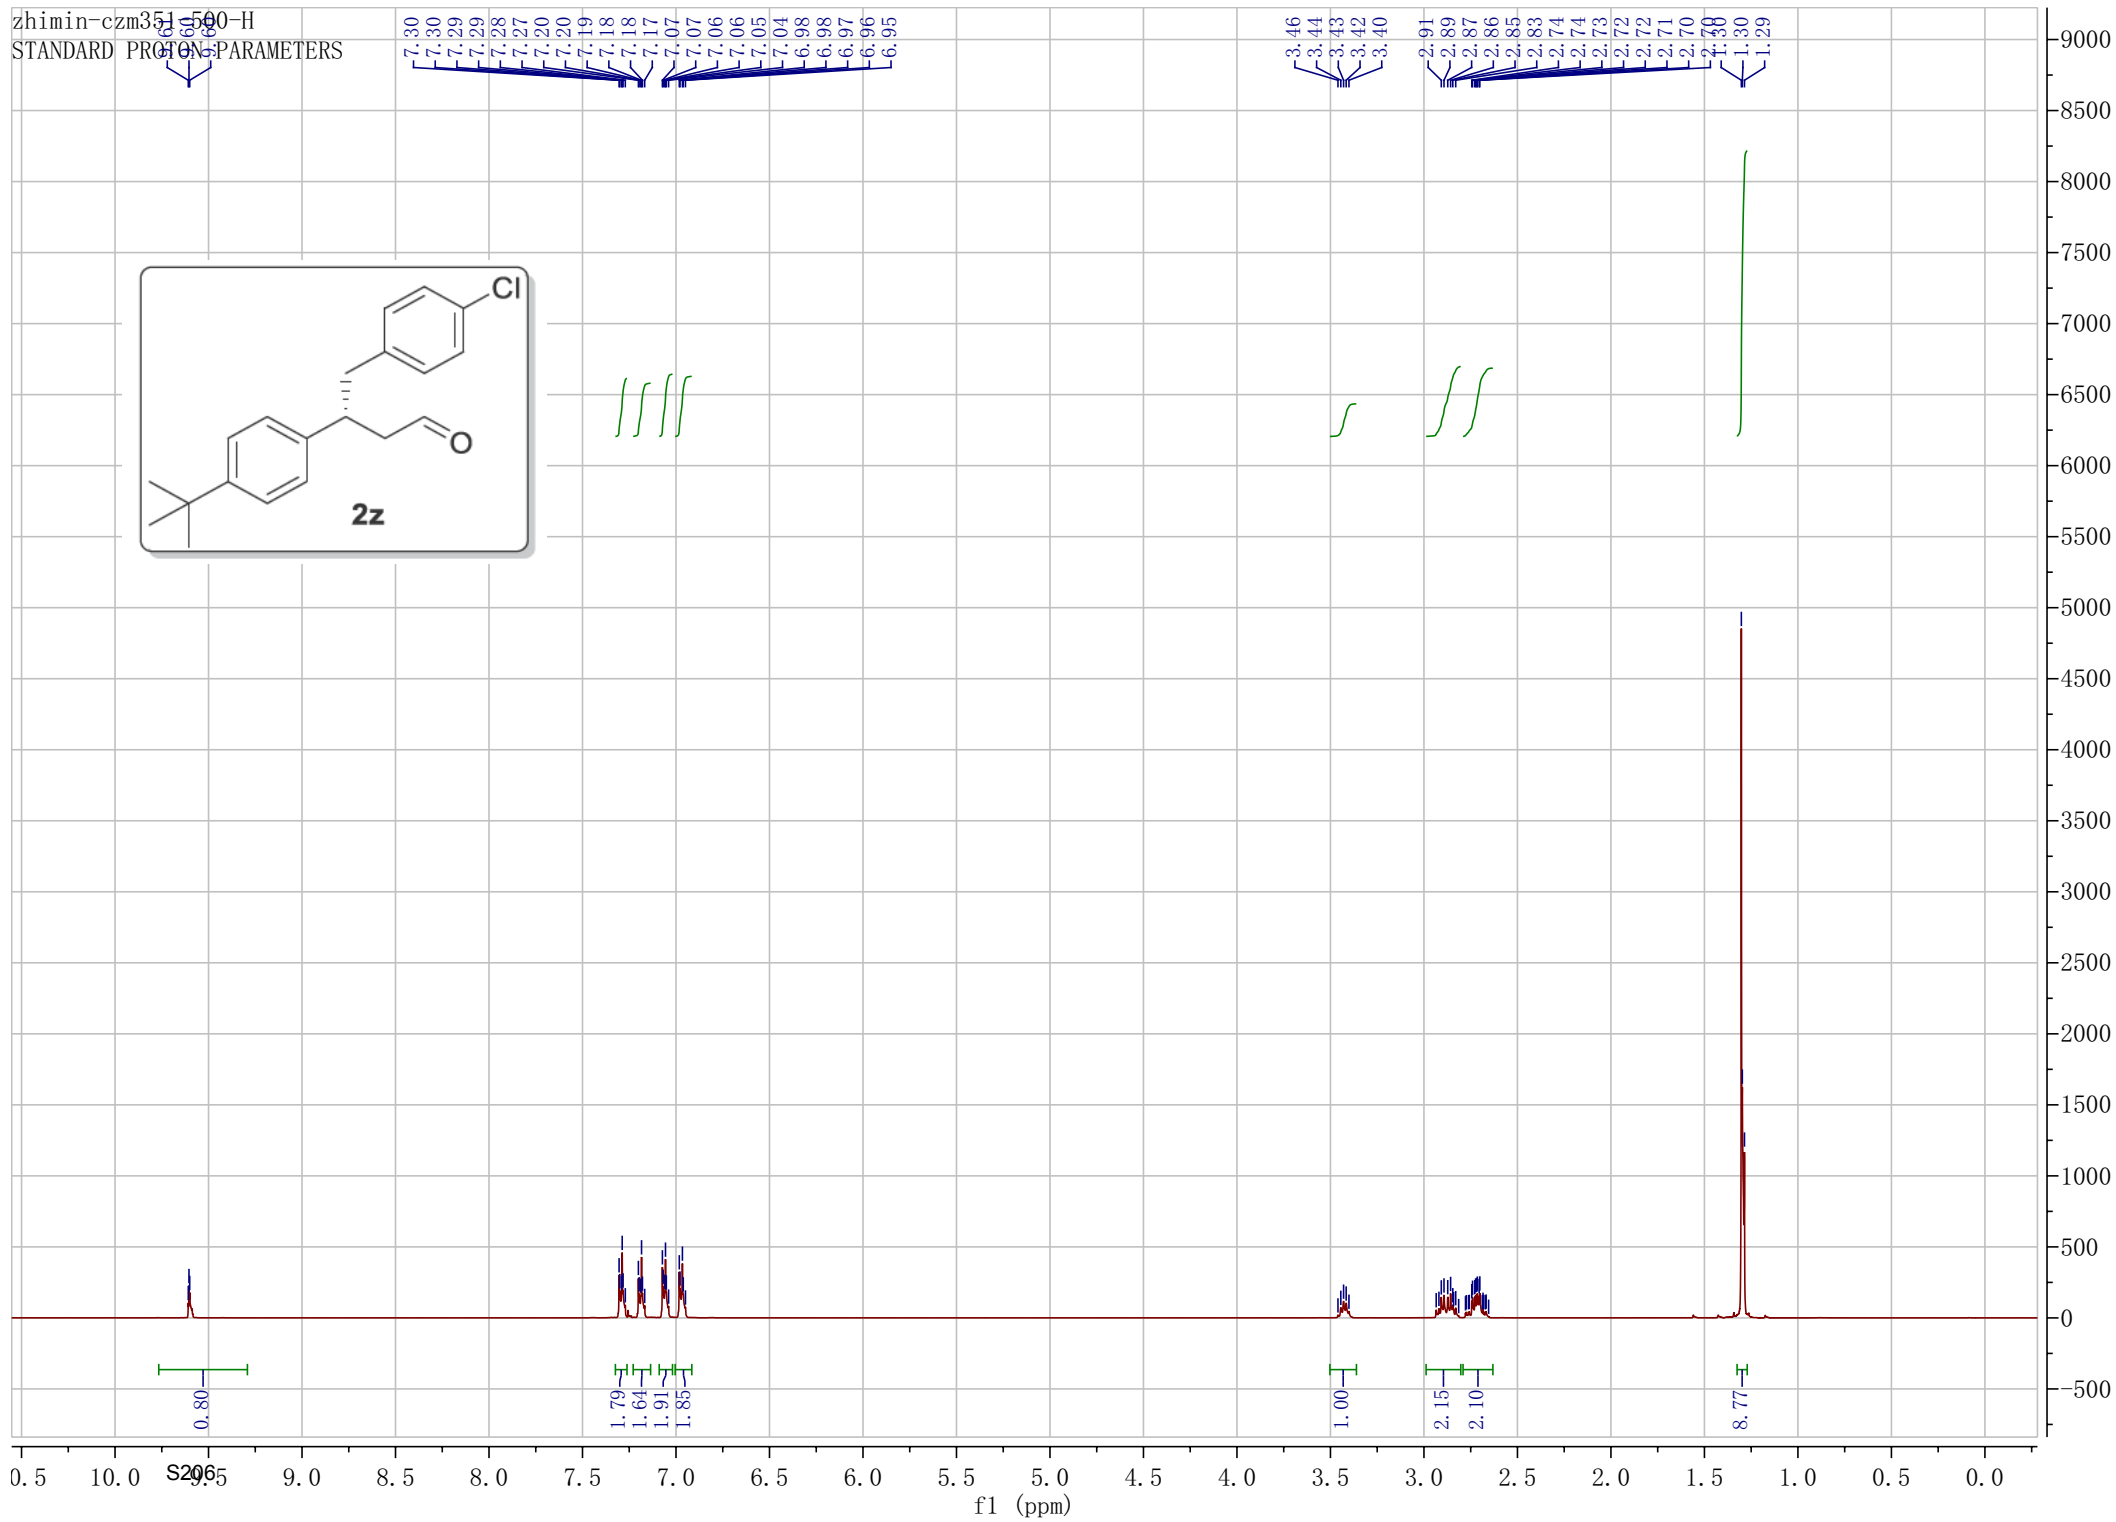

zhimin-czm351-300-C  
13C OBSERVE

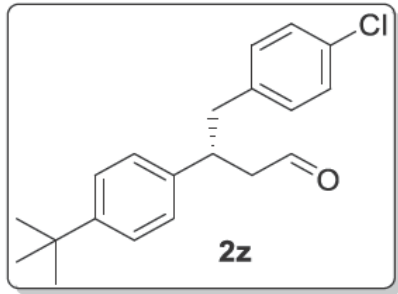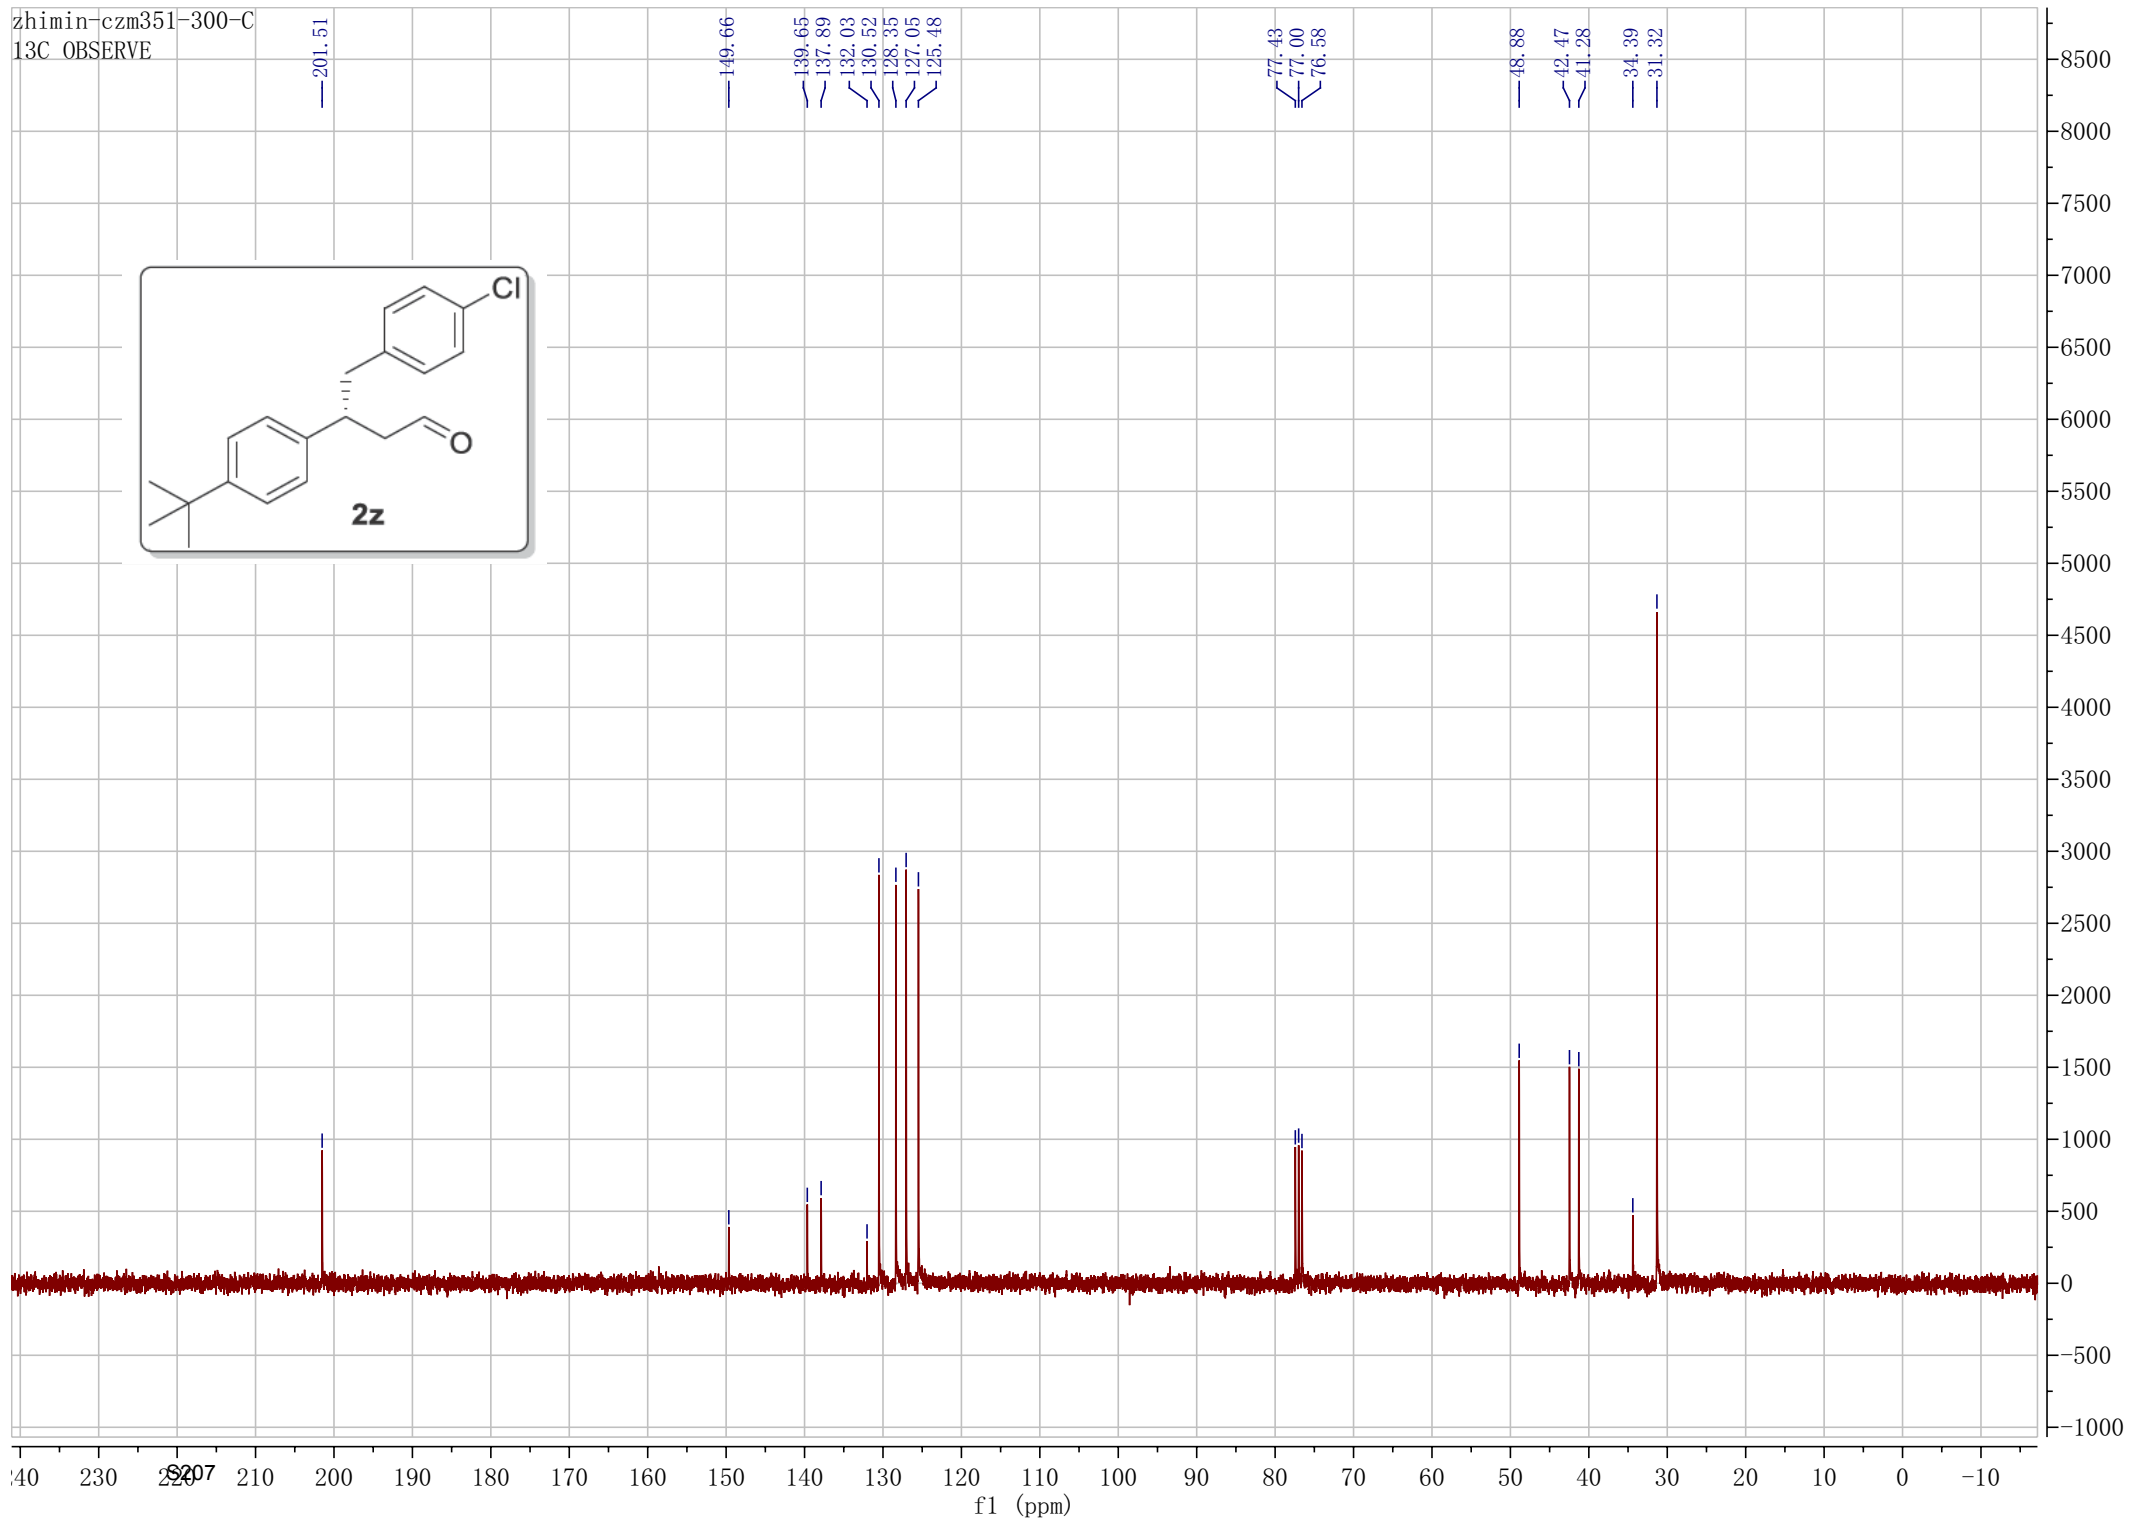

zhimin-czm351-QH-500-H  
STANDARD PROTON PARAMETERS

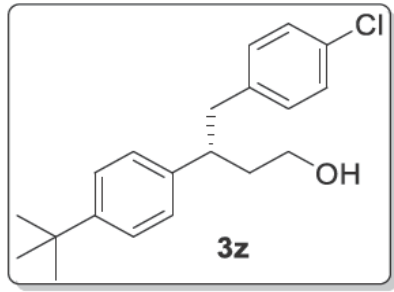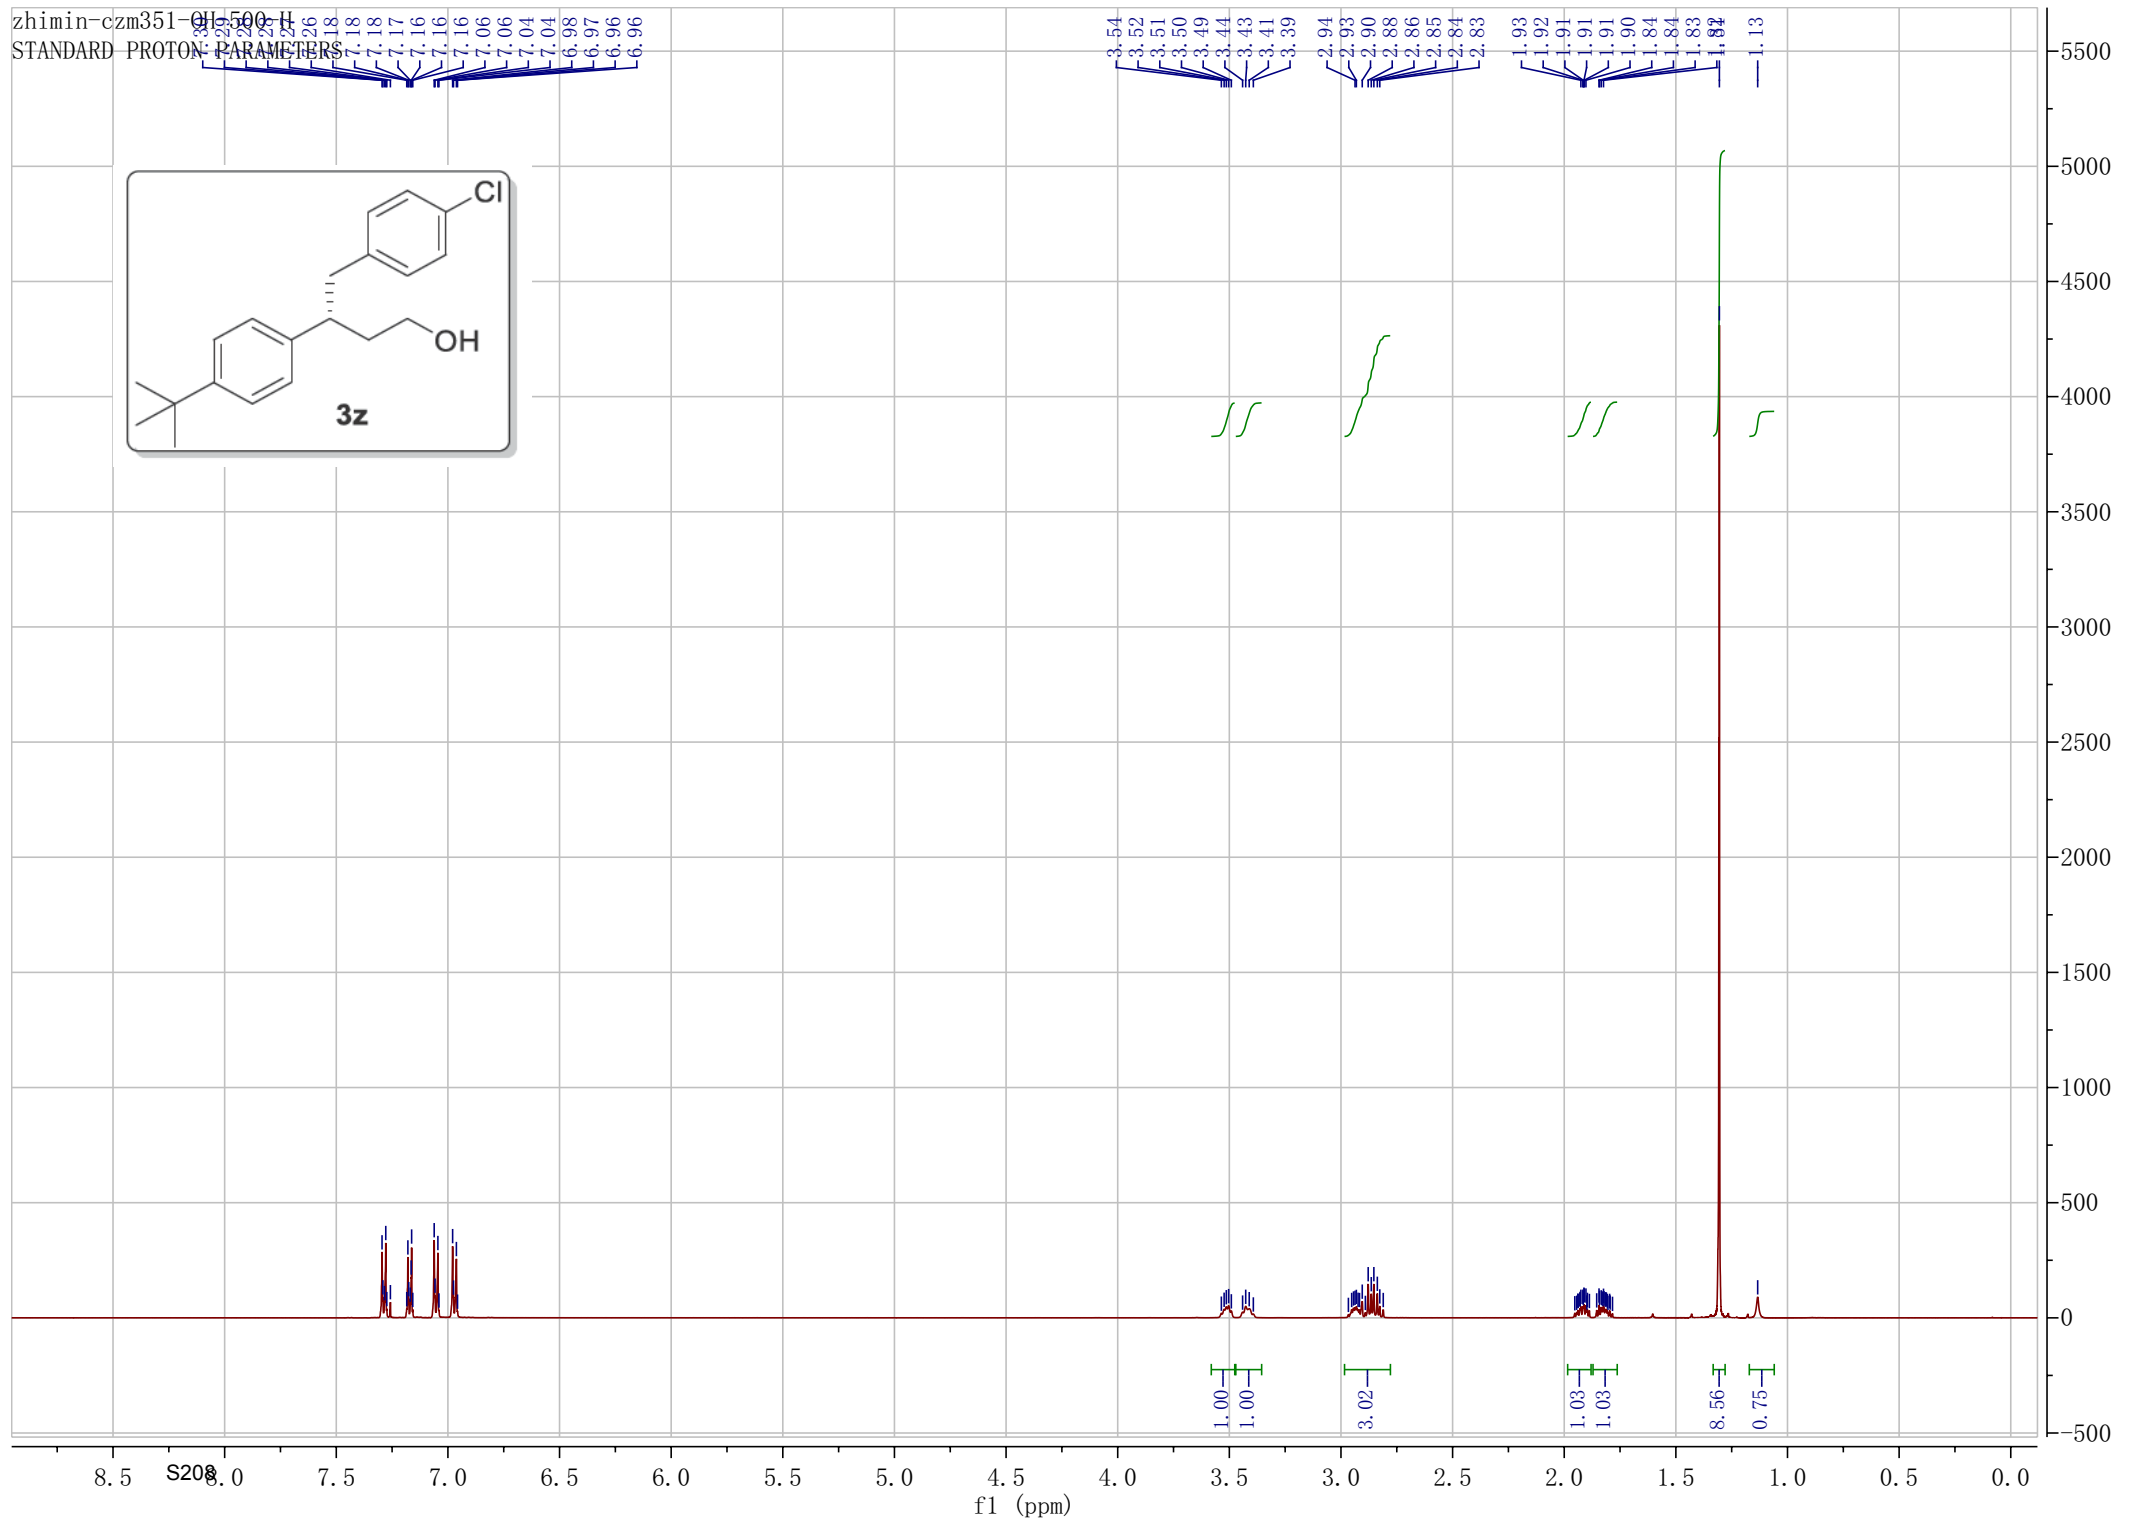

zhimin-czm351-OH-300-C  
13C OBSERVE

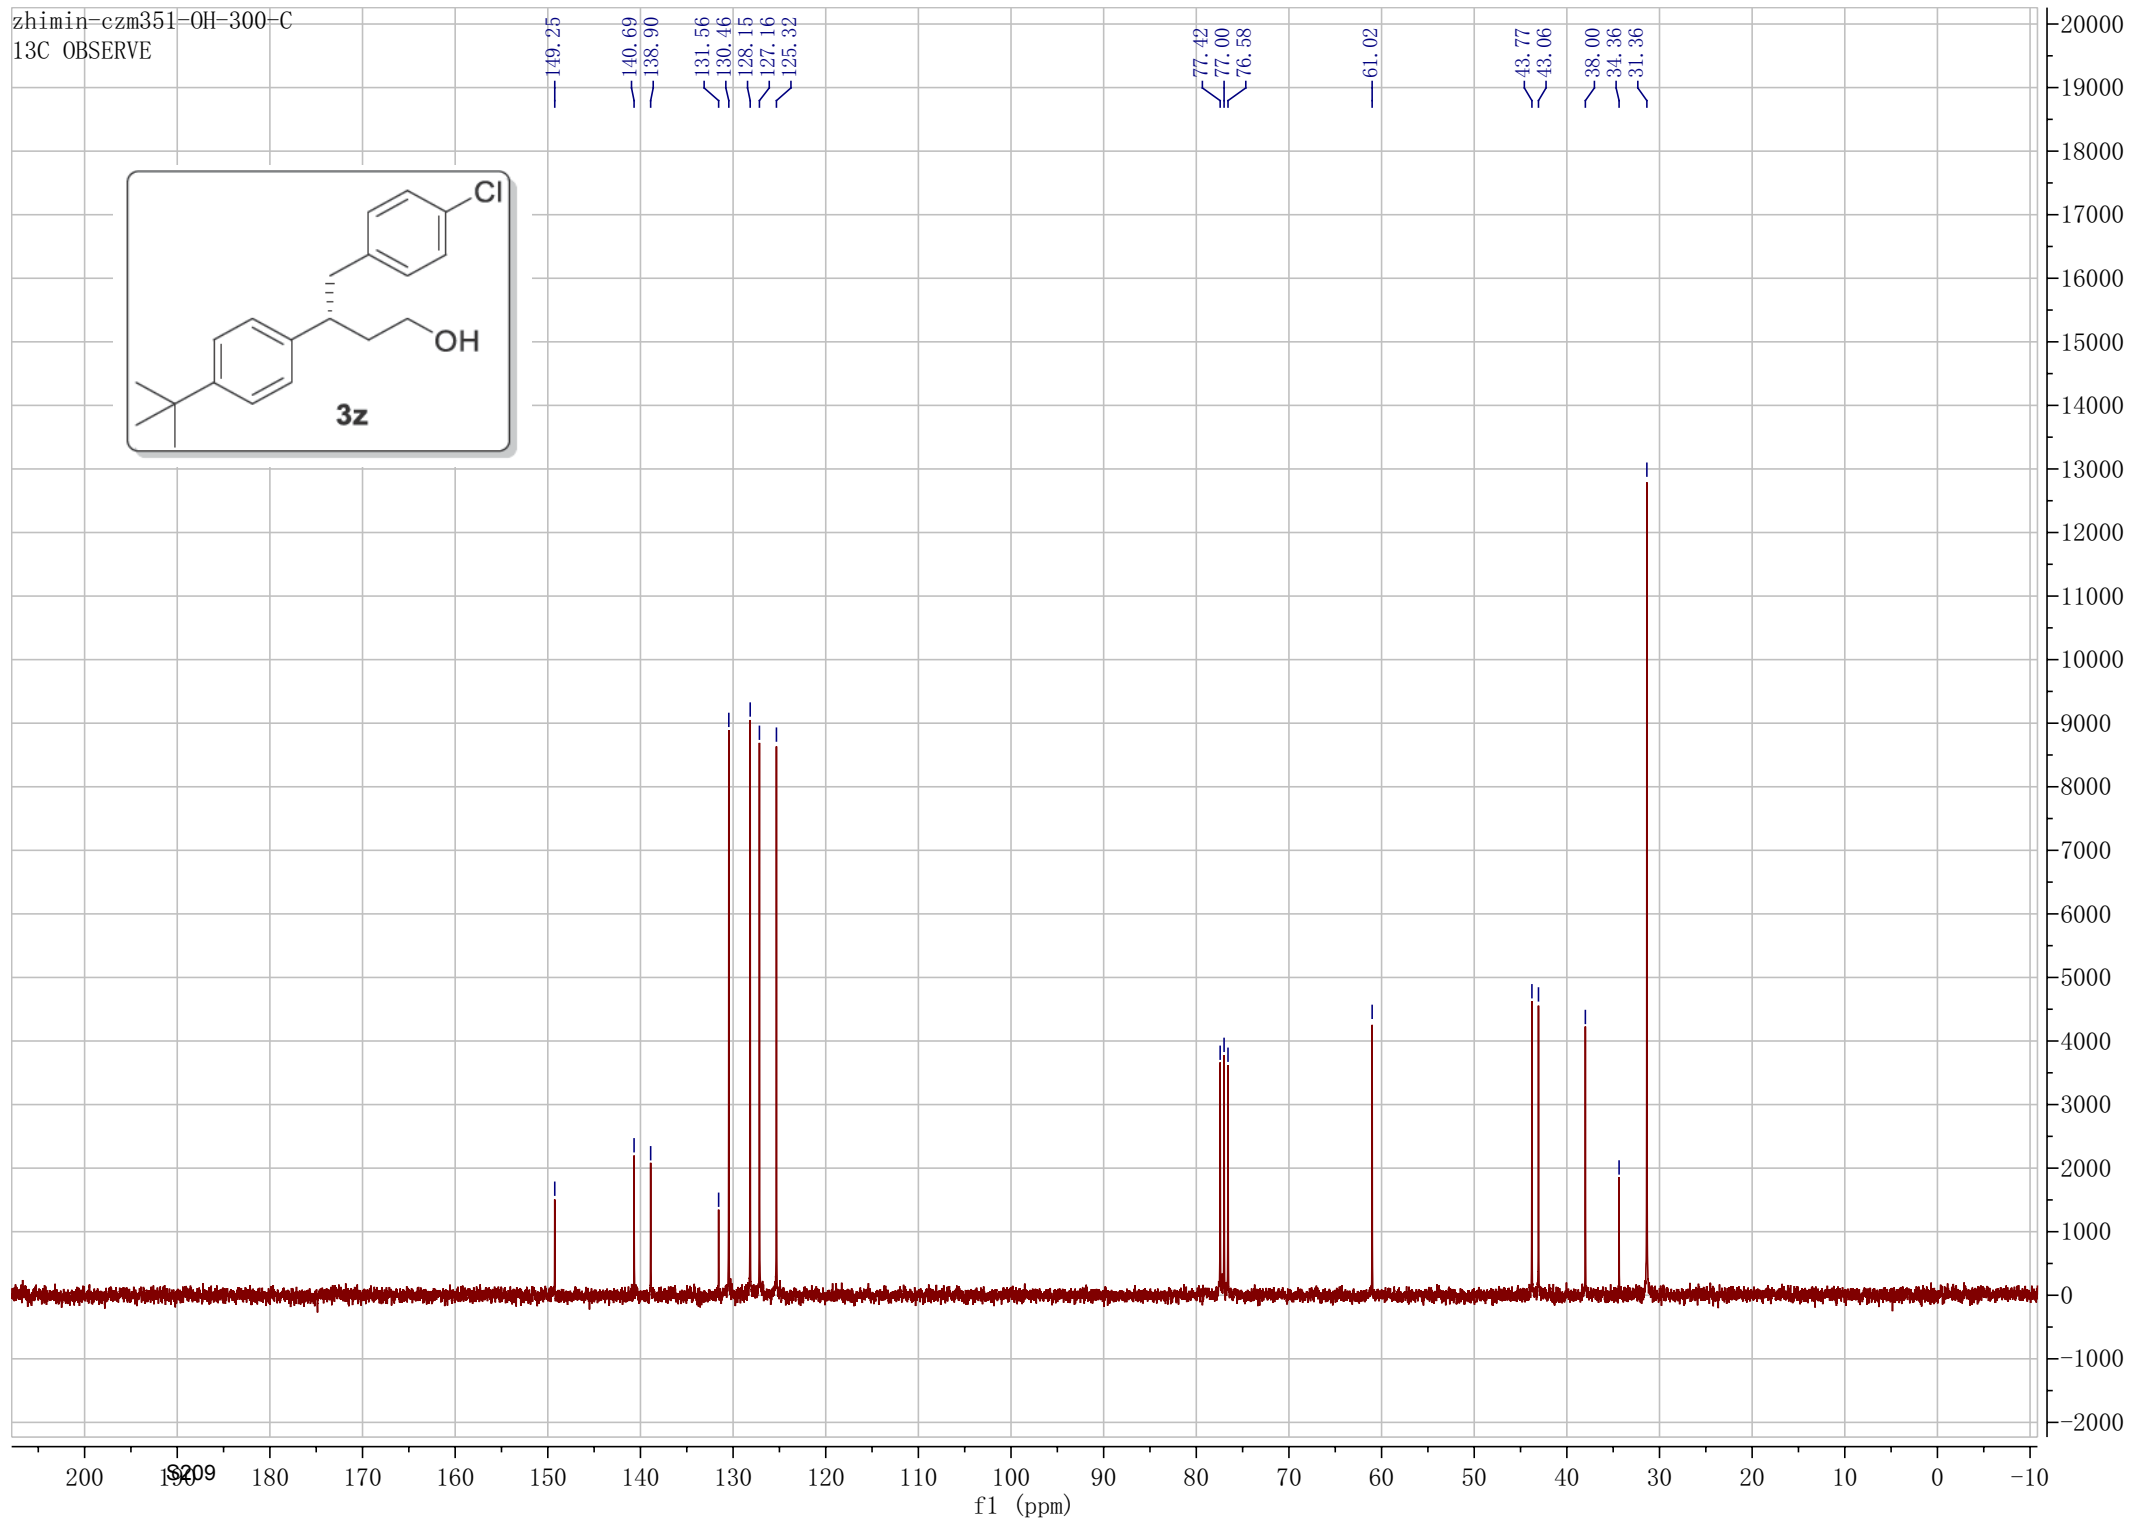

zhimin-czmlp-19-OH-300-H  
UofUtah Unity 300-NMR  
STANDARD 1H OBSERVE

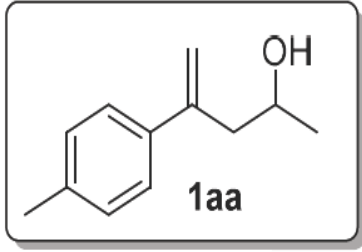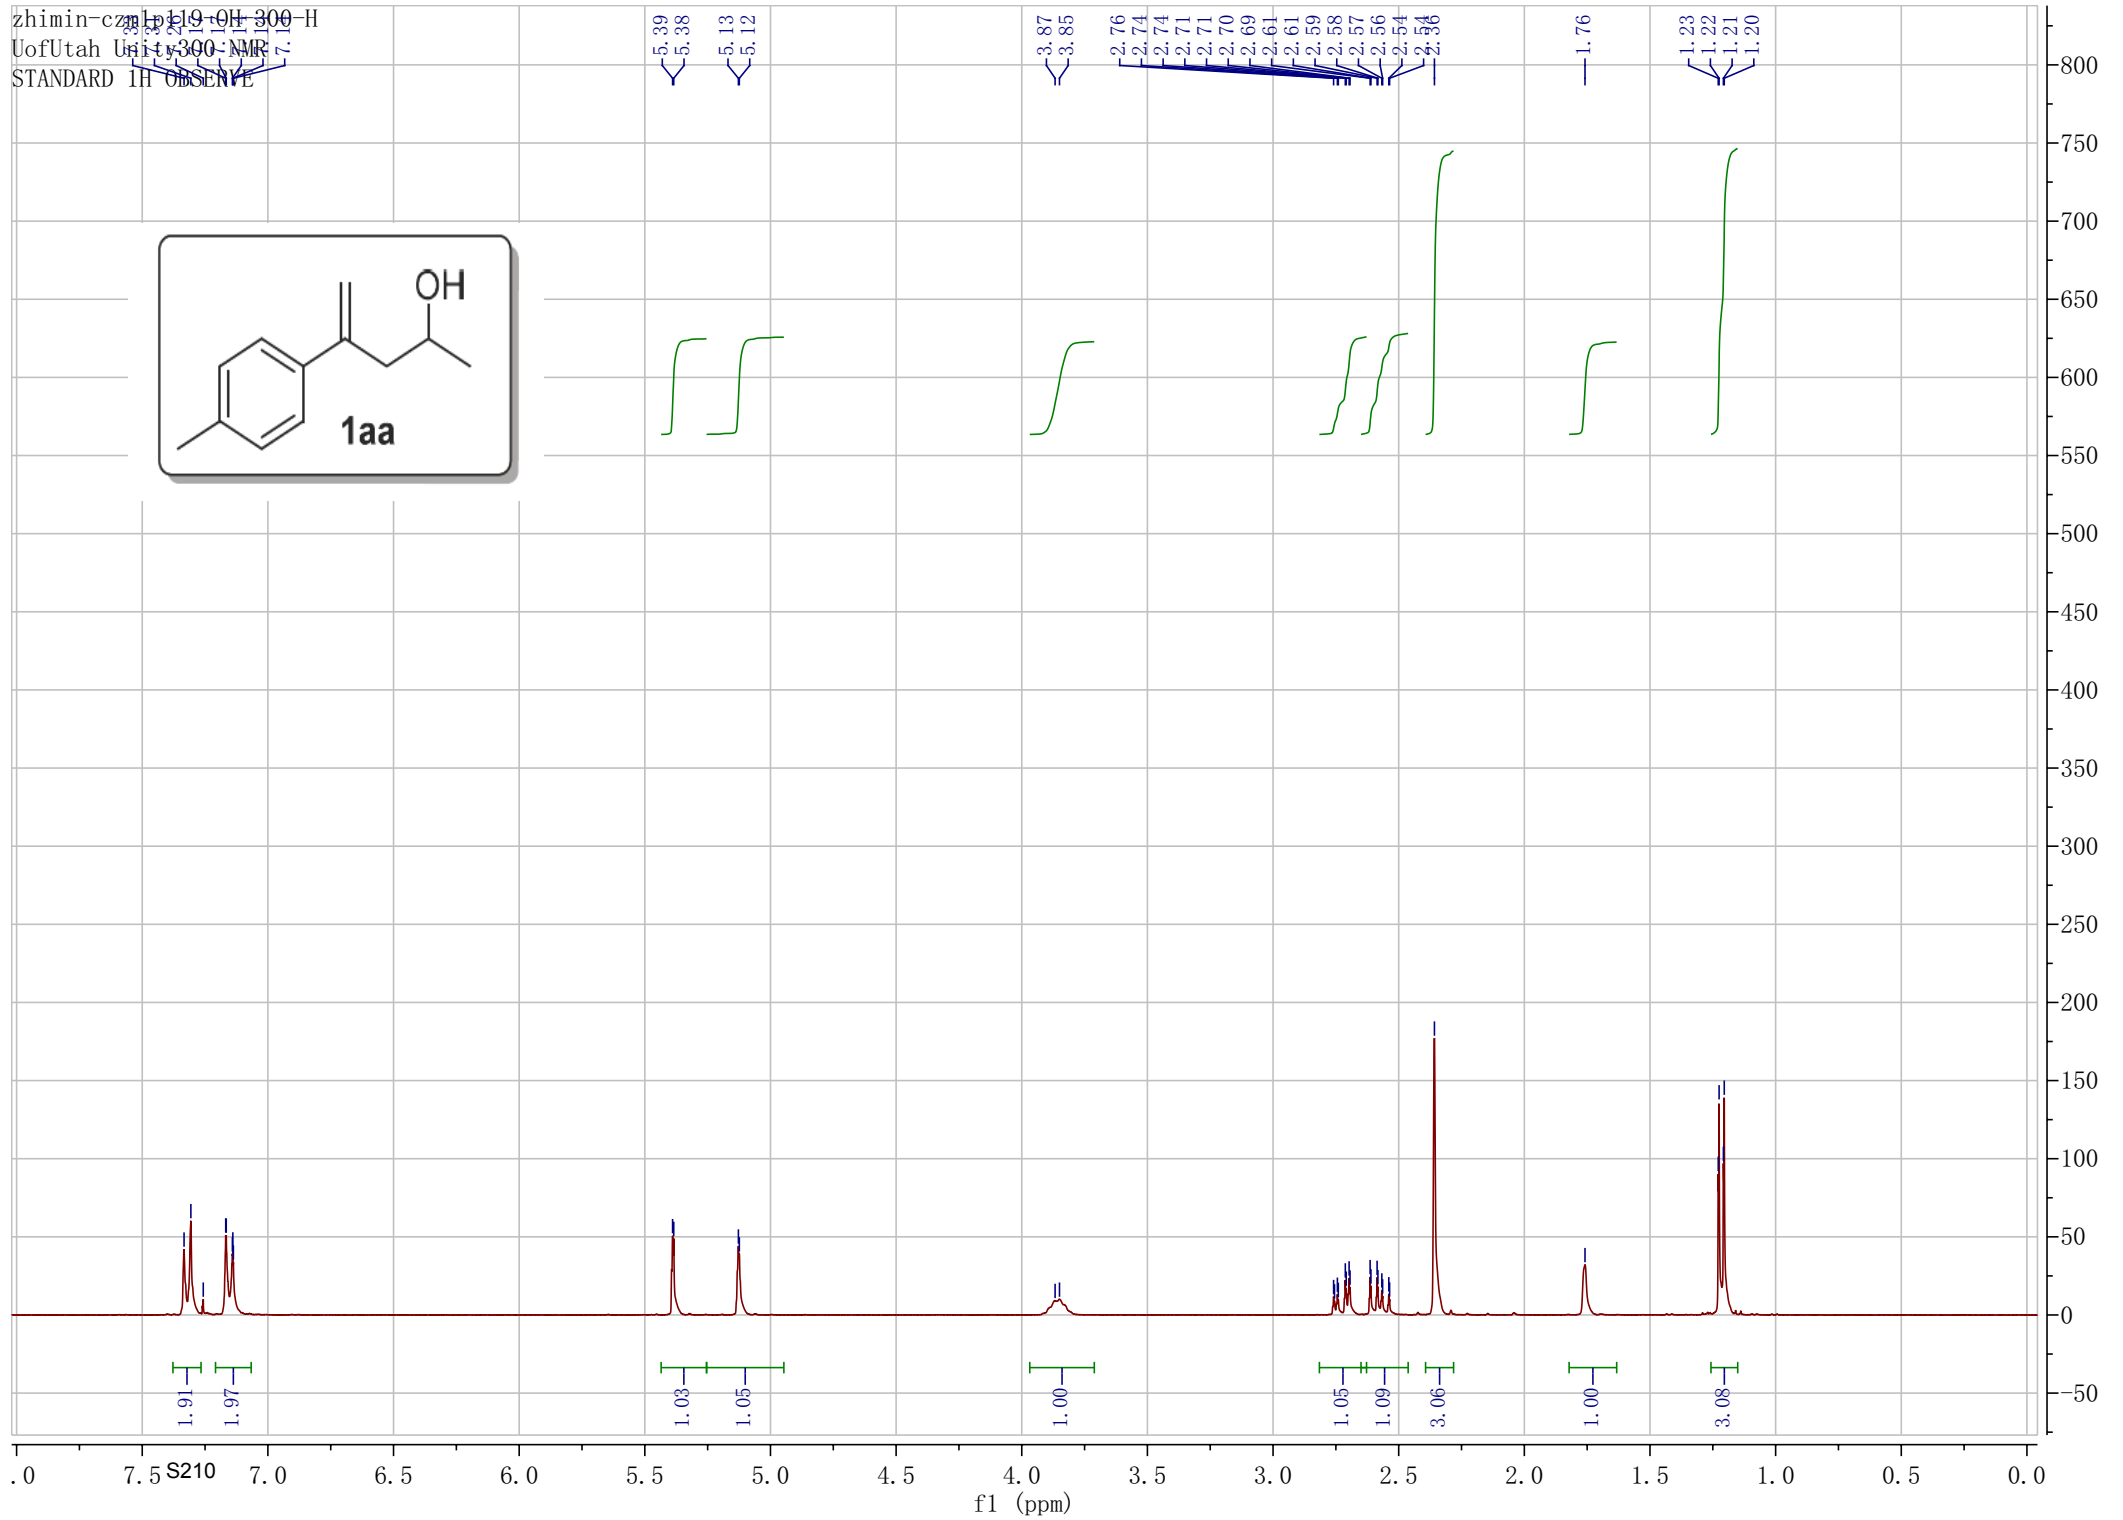



zhimin-czmlp119-OH-300-C  
13C OBSERVE

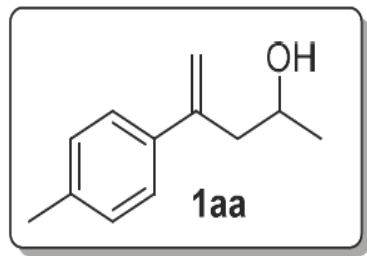

145.14  
137.47  
129.08  
126.01

114.37

77.42  
77.00  
76.58

65.74

45.49

22.77  
21.04

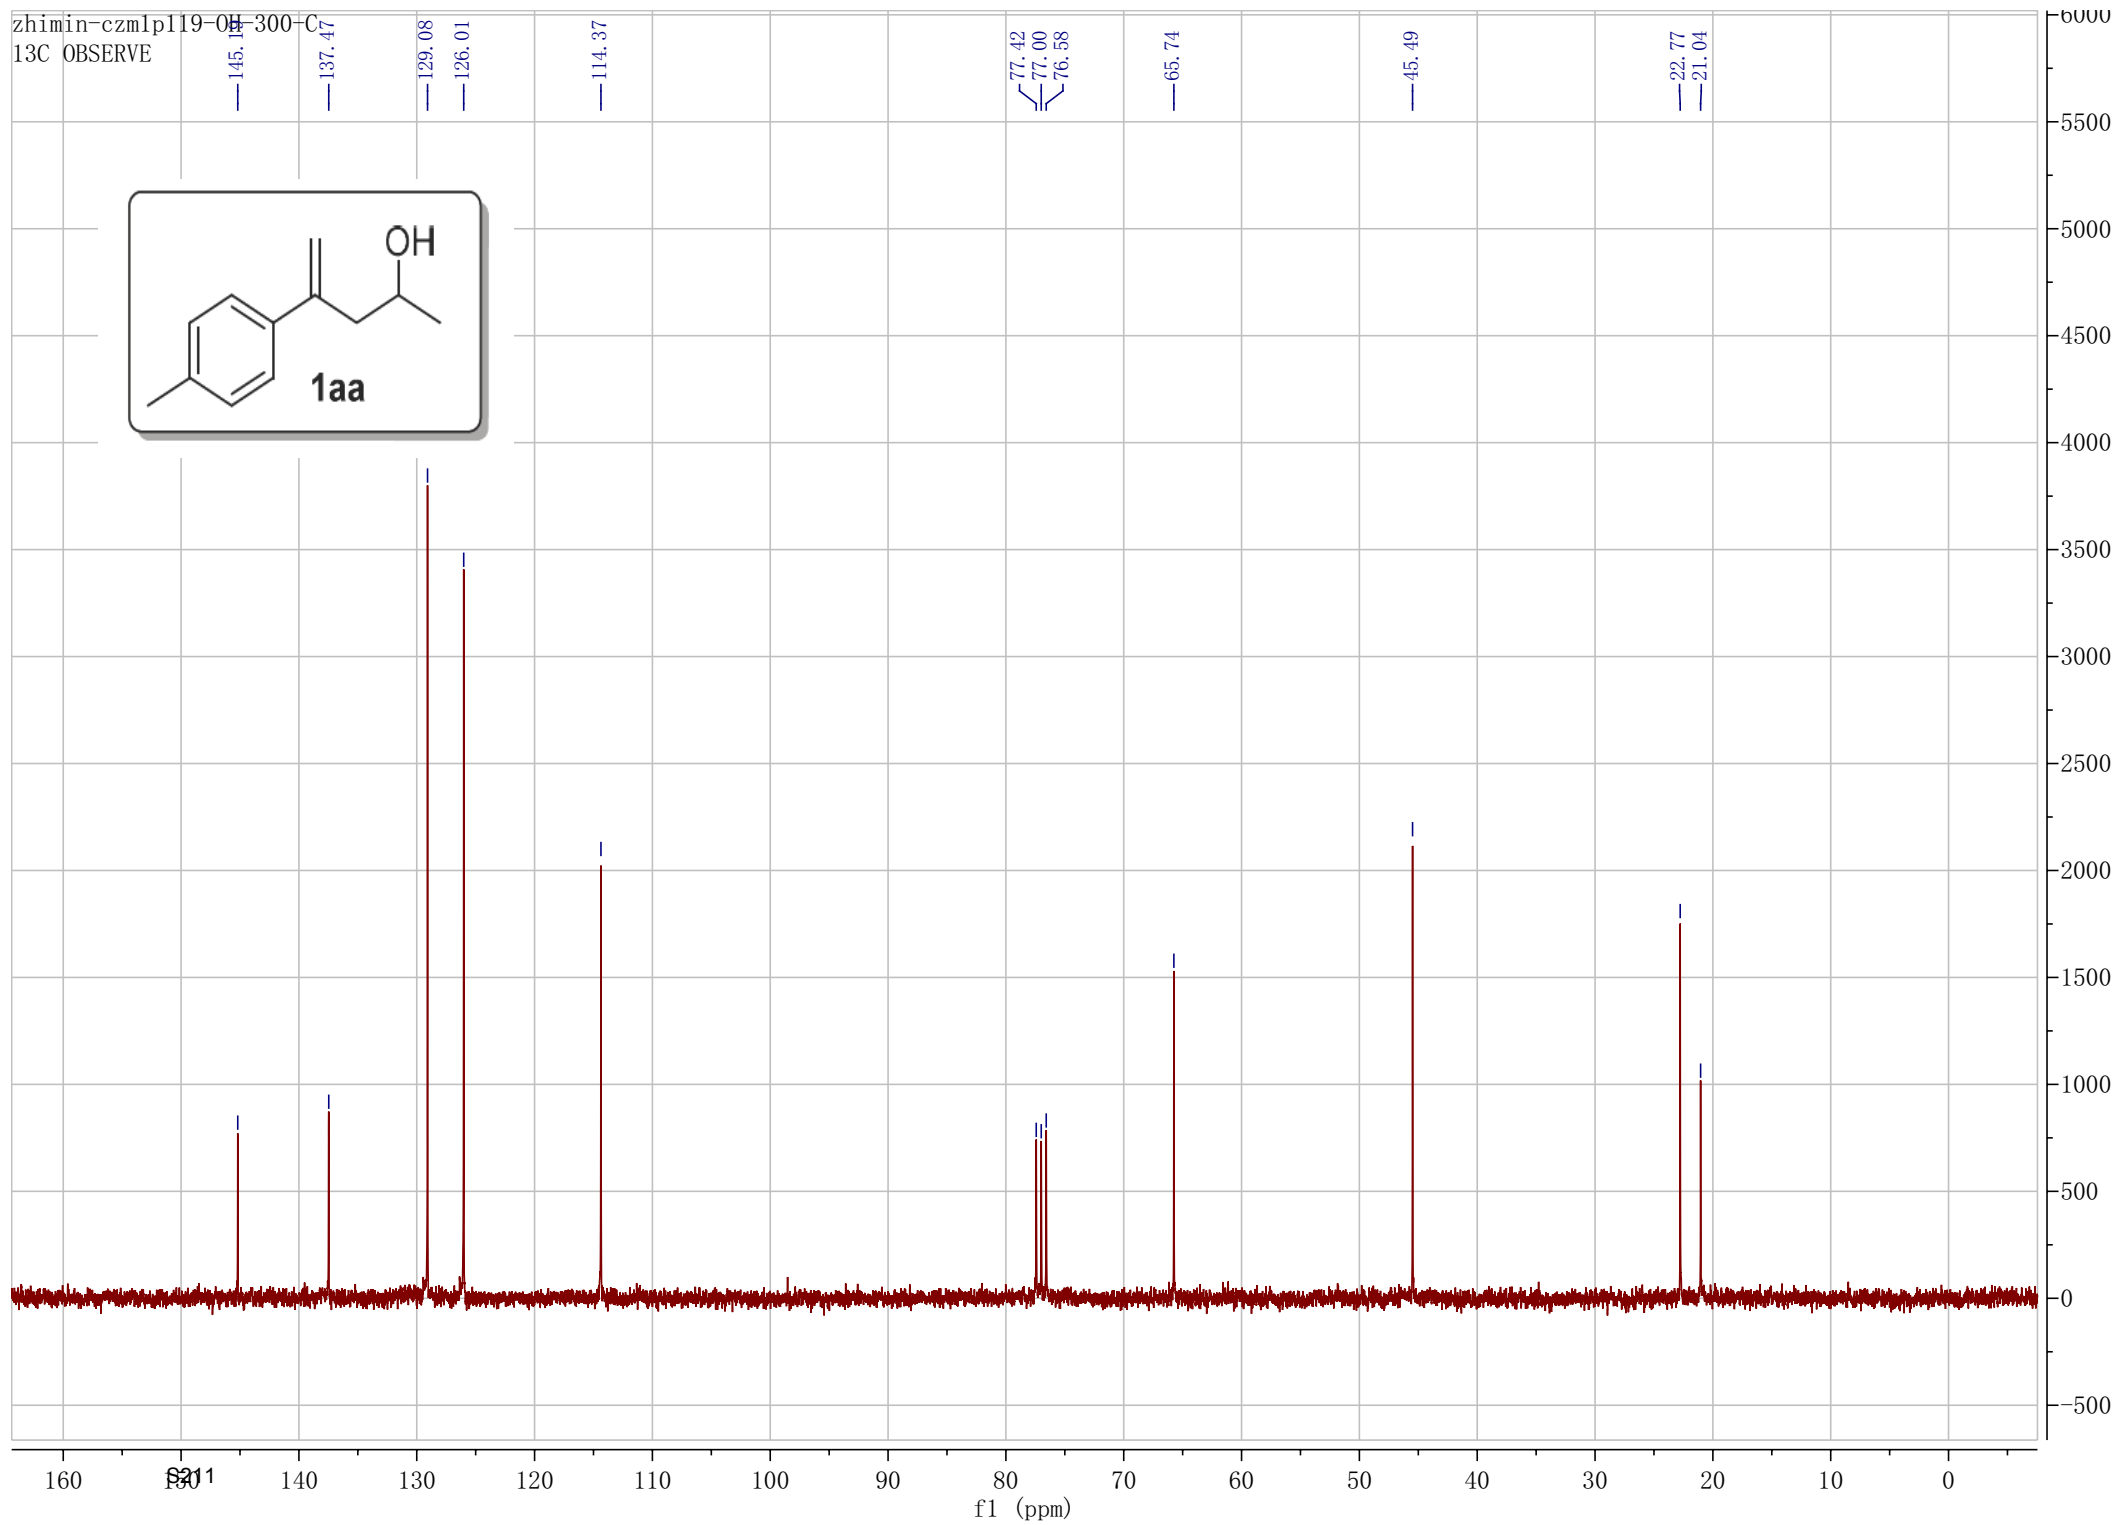

zhimin-czm342-H  
STANDARD PROTON PARAMETERS

7.26  
7.17  
7.15  
7.06  
7.04  
6.99  
6.97  
6.95  
6.93

3.40  
3.39  
3.37  
3.36  
3.34

2.85  
2.82  
2.75  
2.74  
2.72  
2.71

2.00

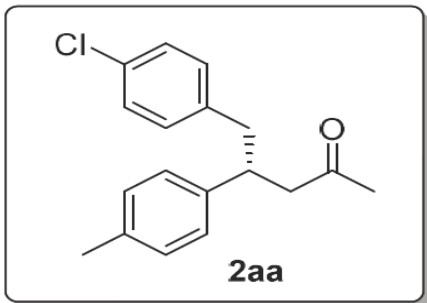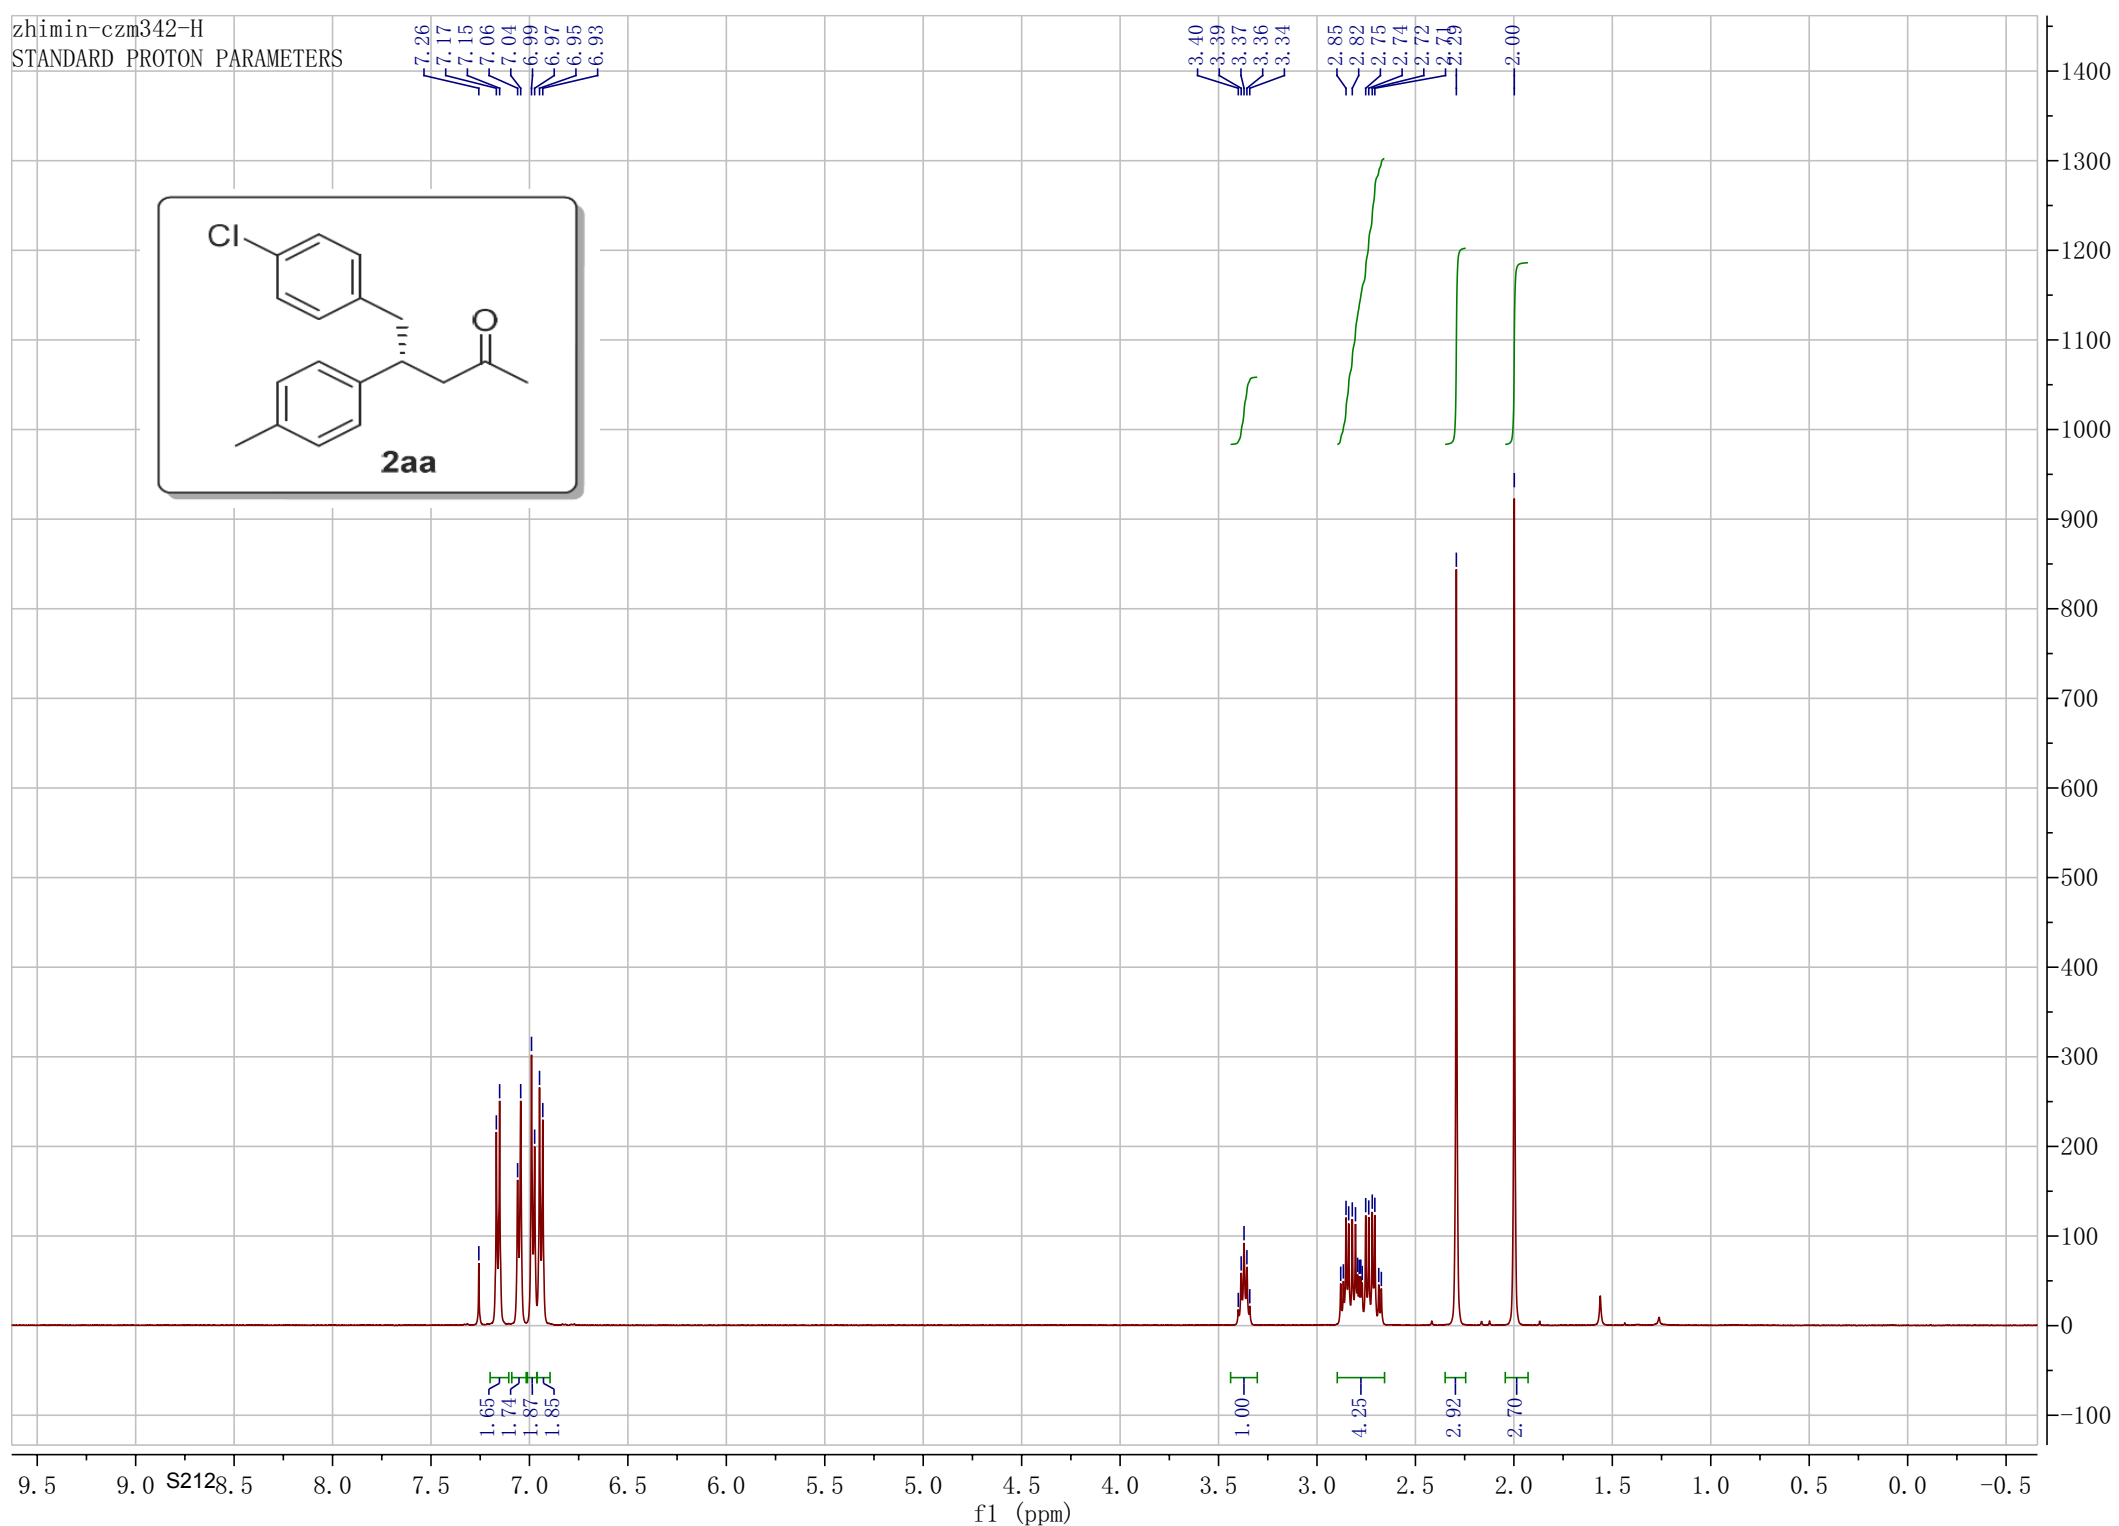

9.5 9.0 S2128 8.5 8.0 7.5 7.0 6.5 6.0 5.5 5.0 4.5 4.0 3.5 3.0 2.5 2.0 1.5 1.0 0.5 0.0 -0.5  
f1 (ppm)

zhimin-4  
zm342-300-C  
13C OBSERVE

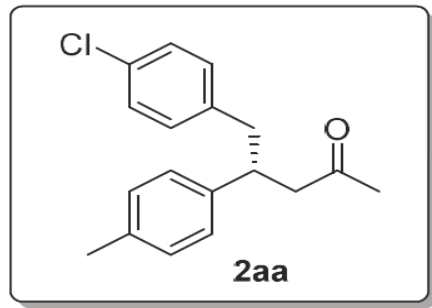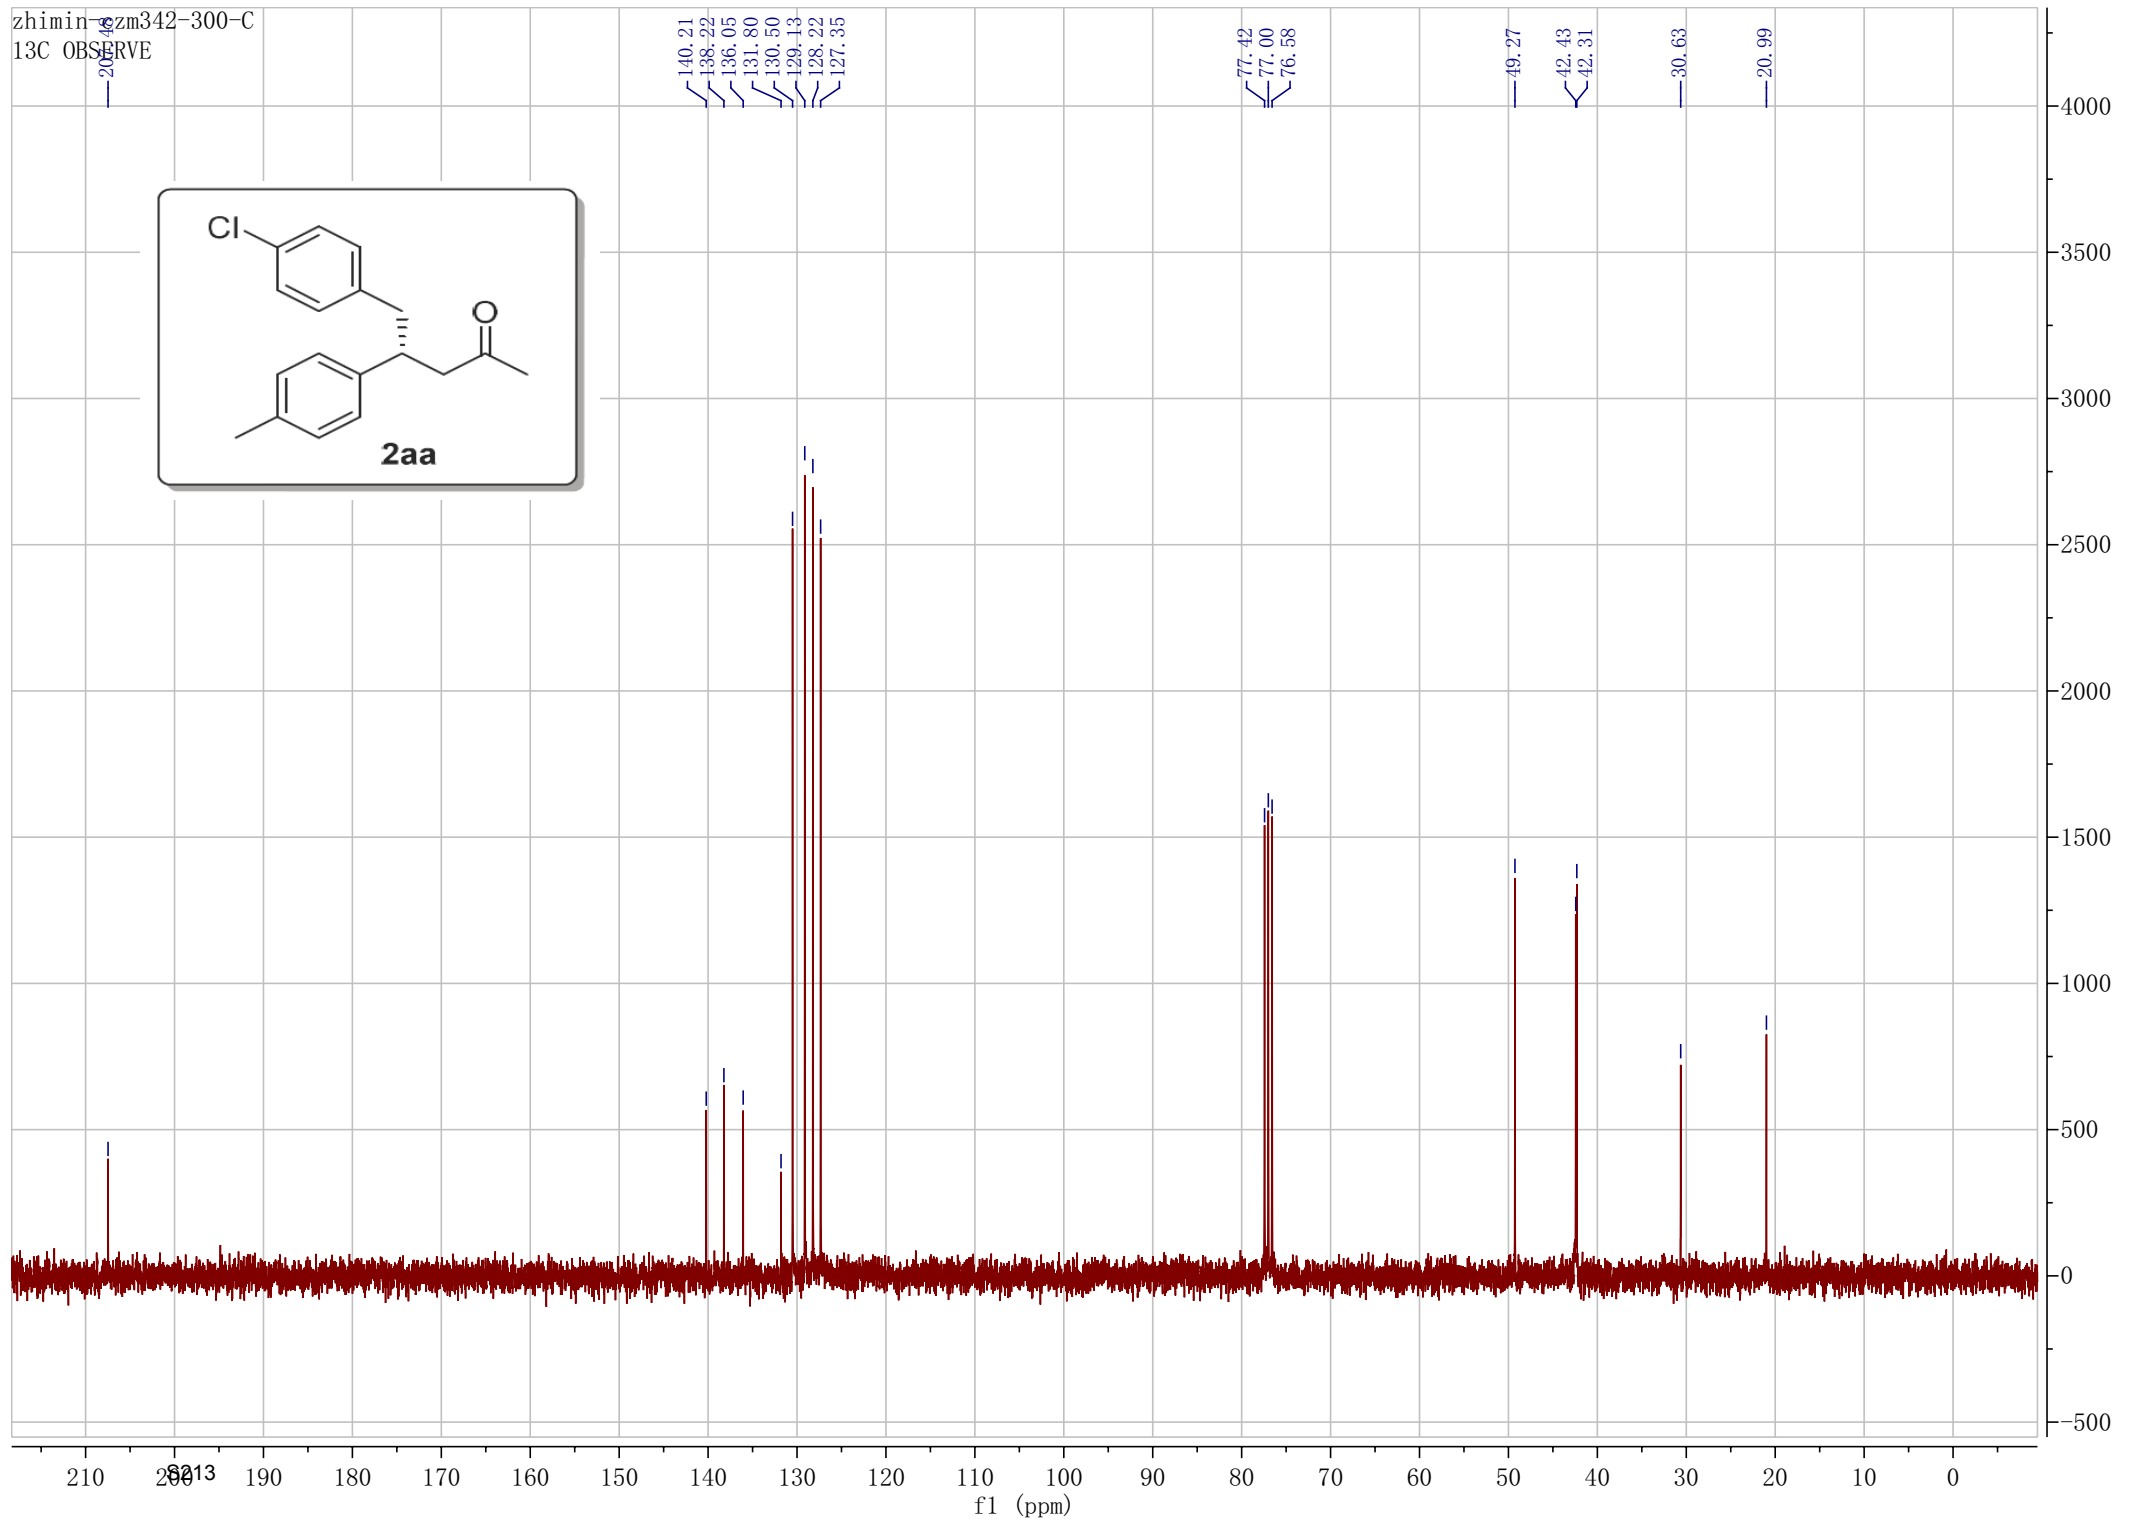

zhimin-czm394-CHO-300-H  
UofUtah Unity300-300-MR  
STANDARD 1H OBSERVE

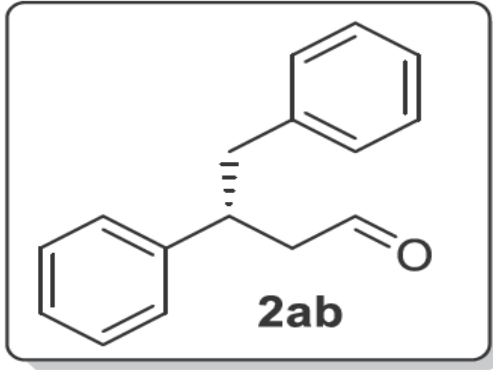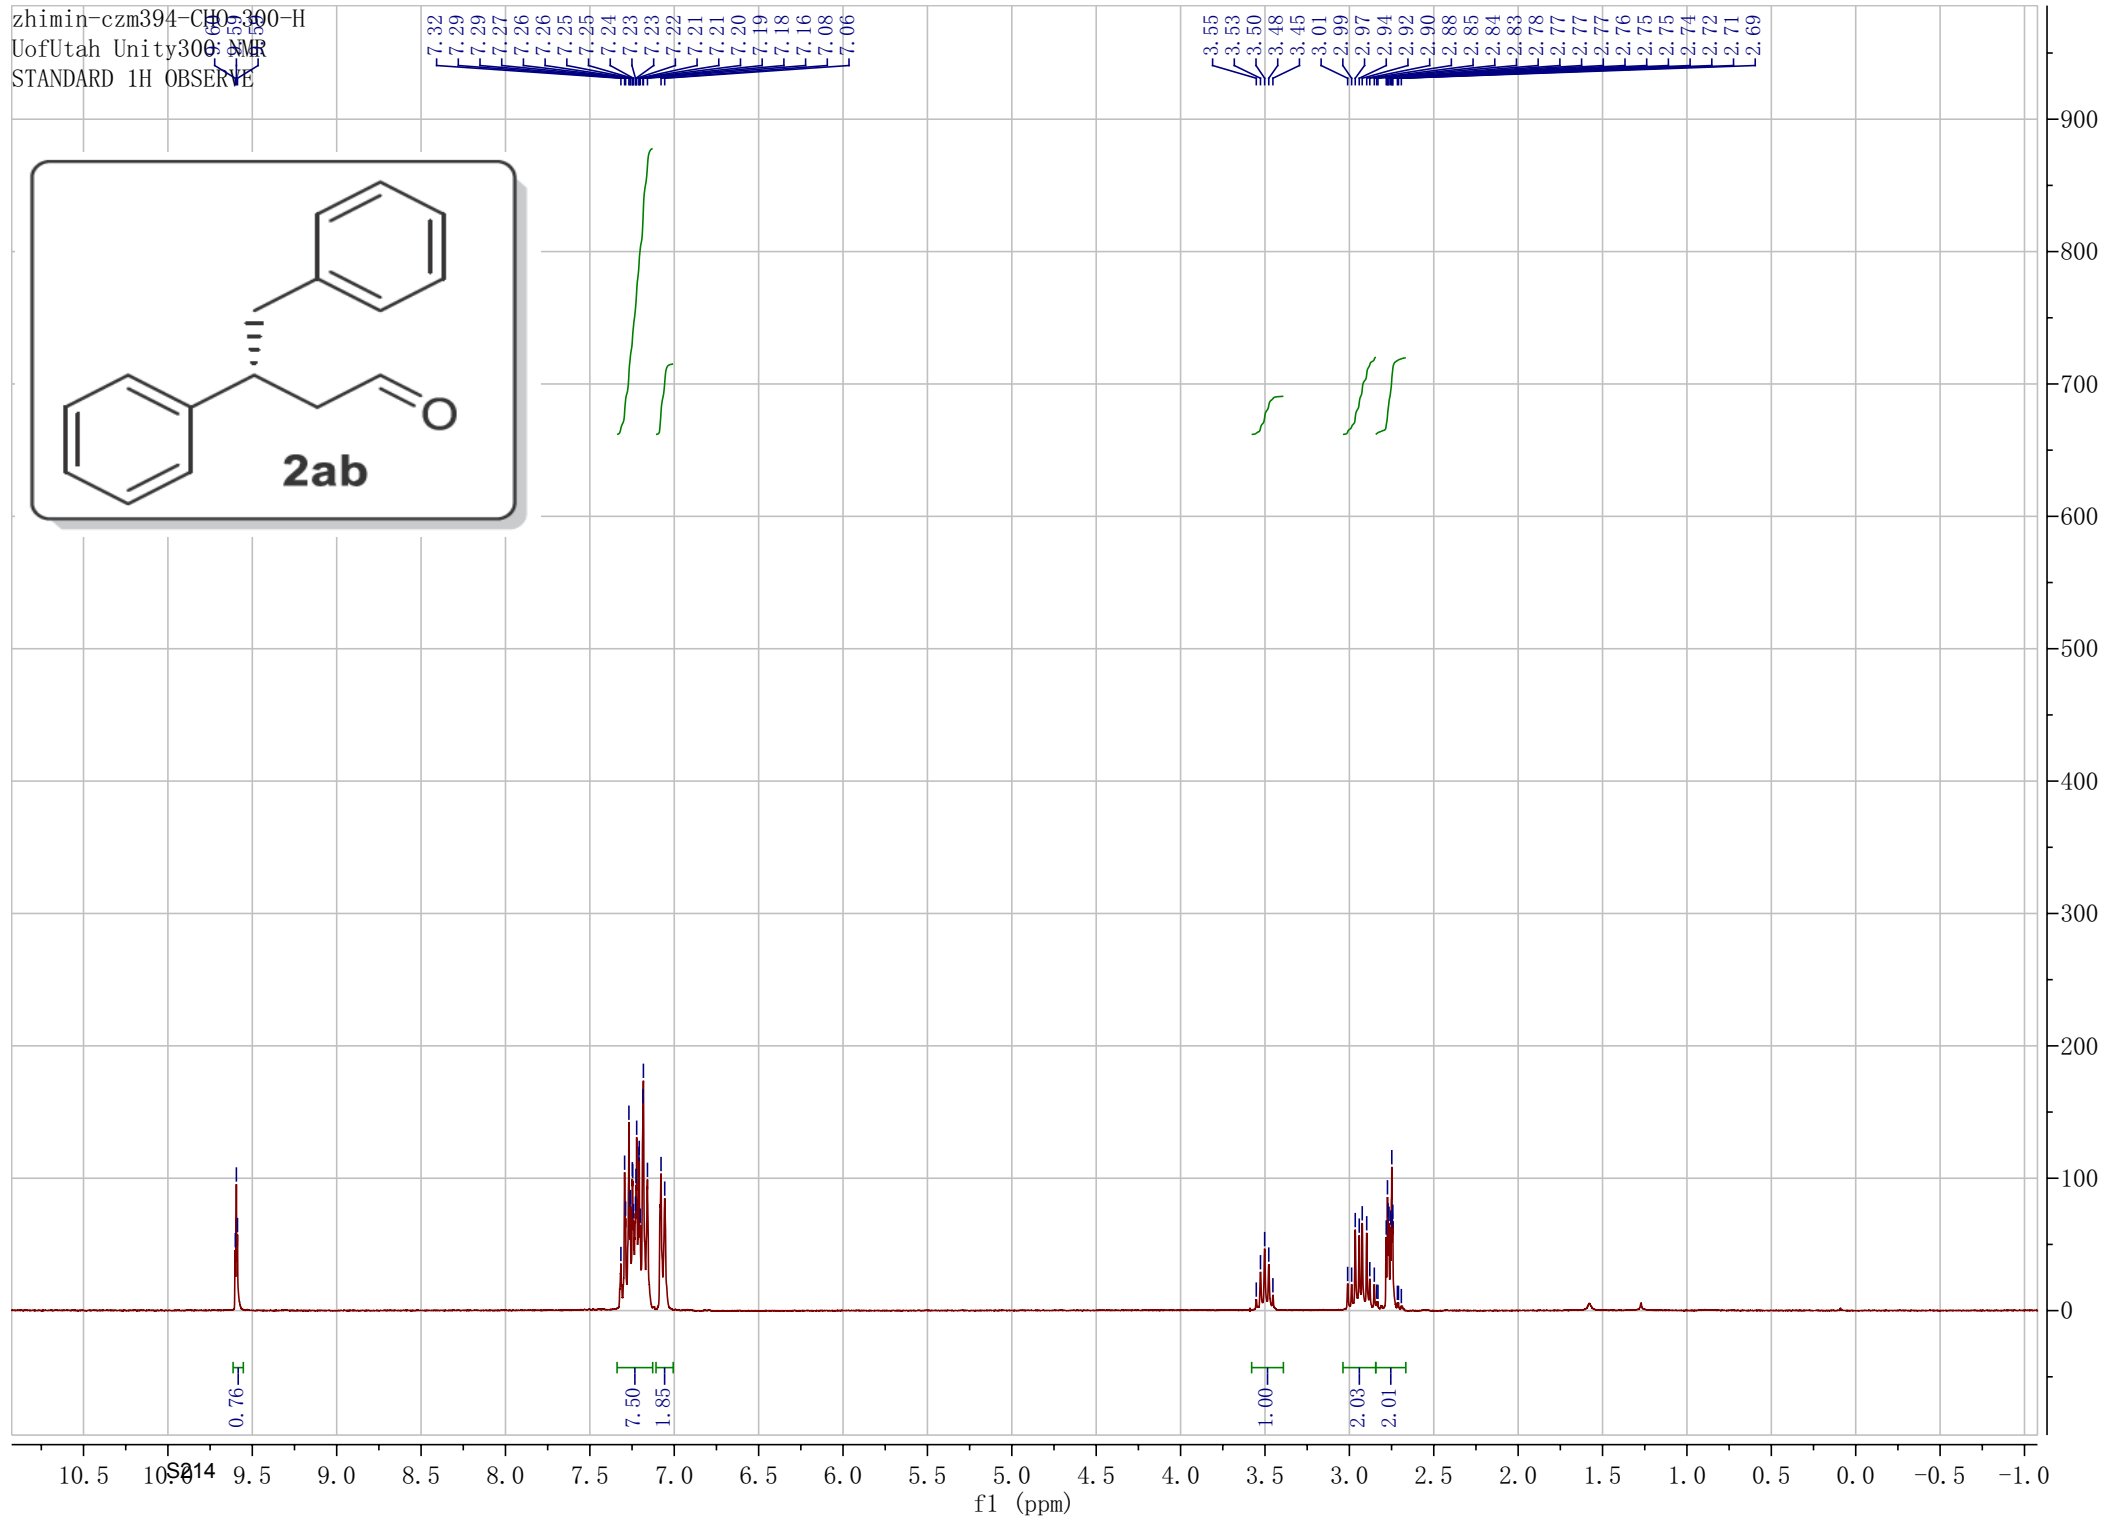

zhimin-czm390-CHO-300-C  
13C OBSERVE

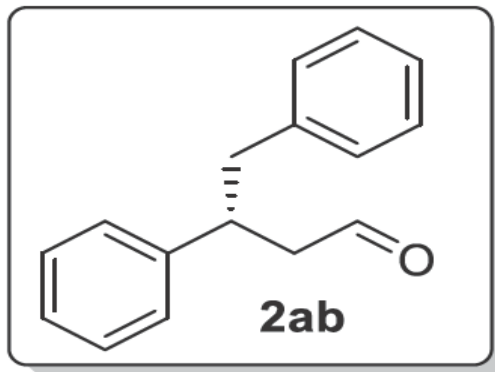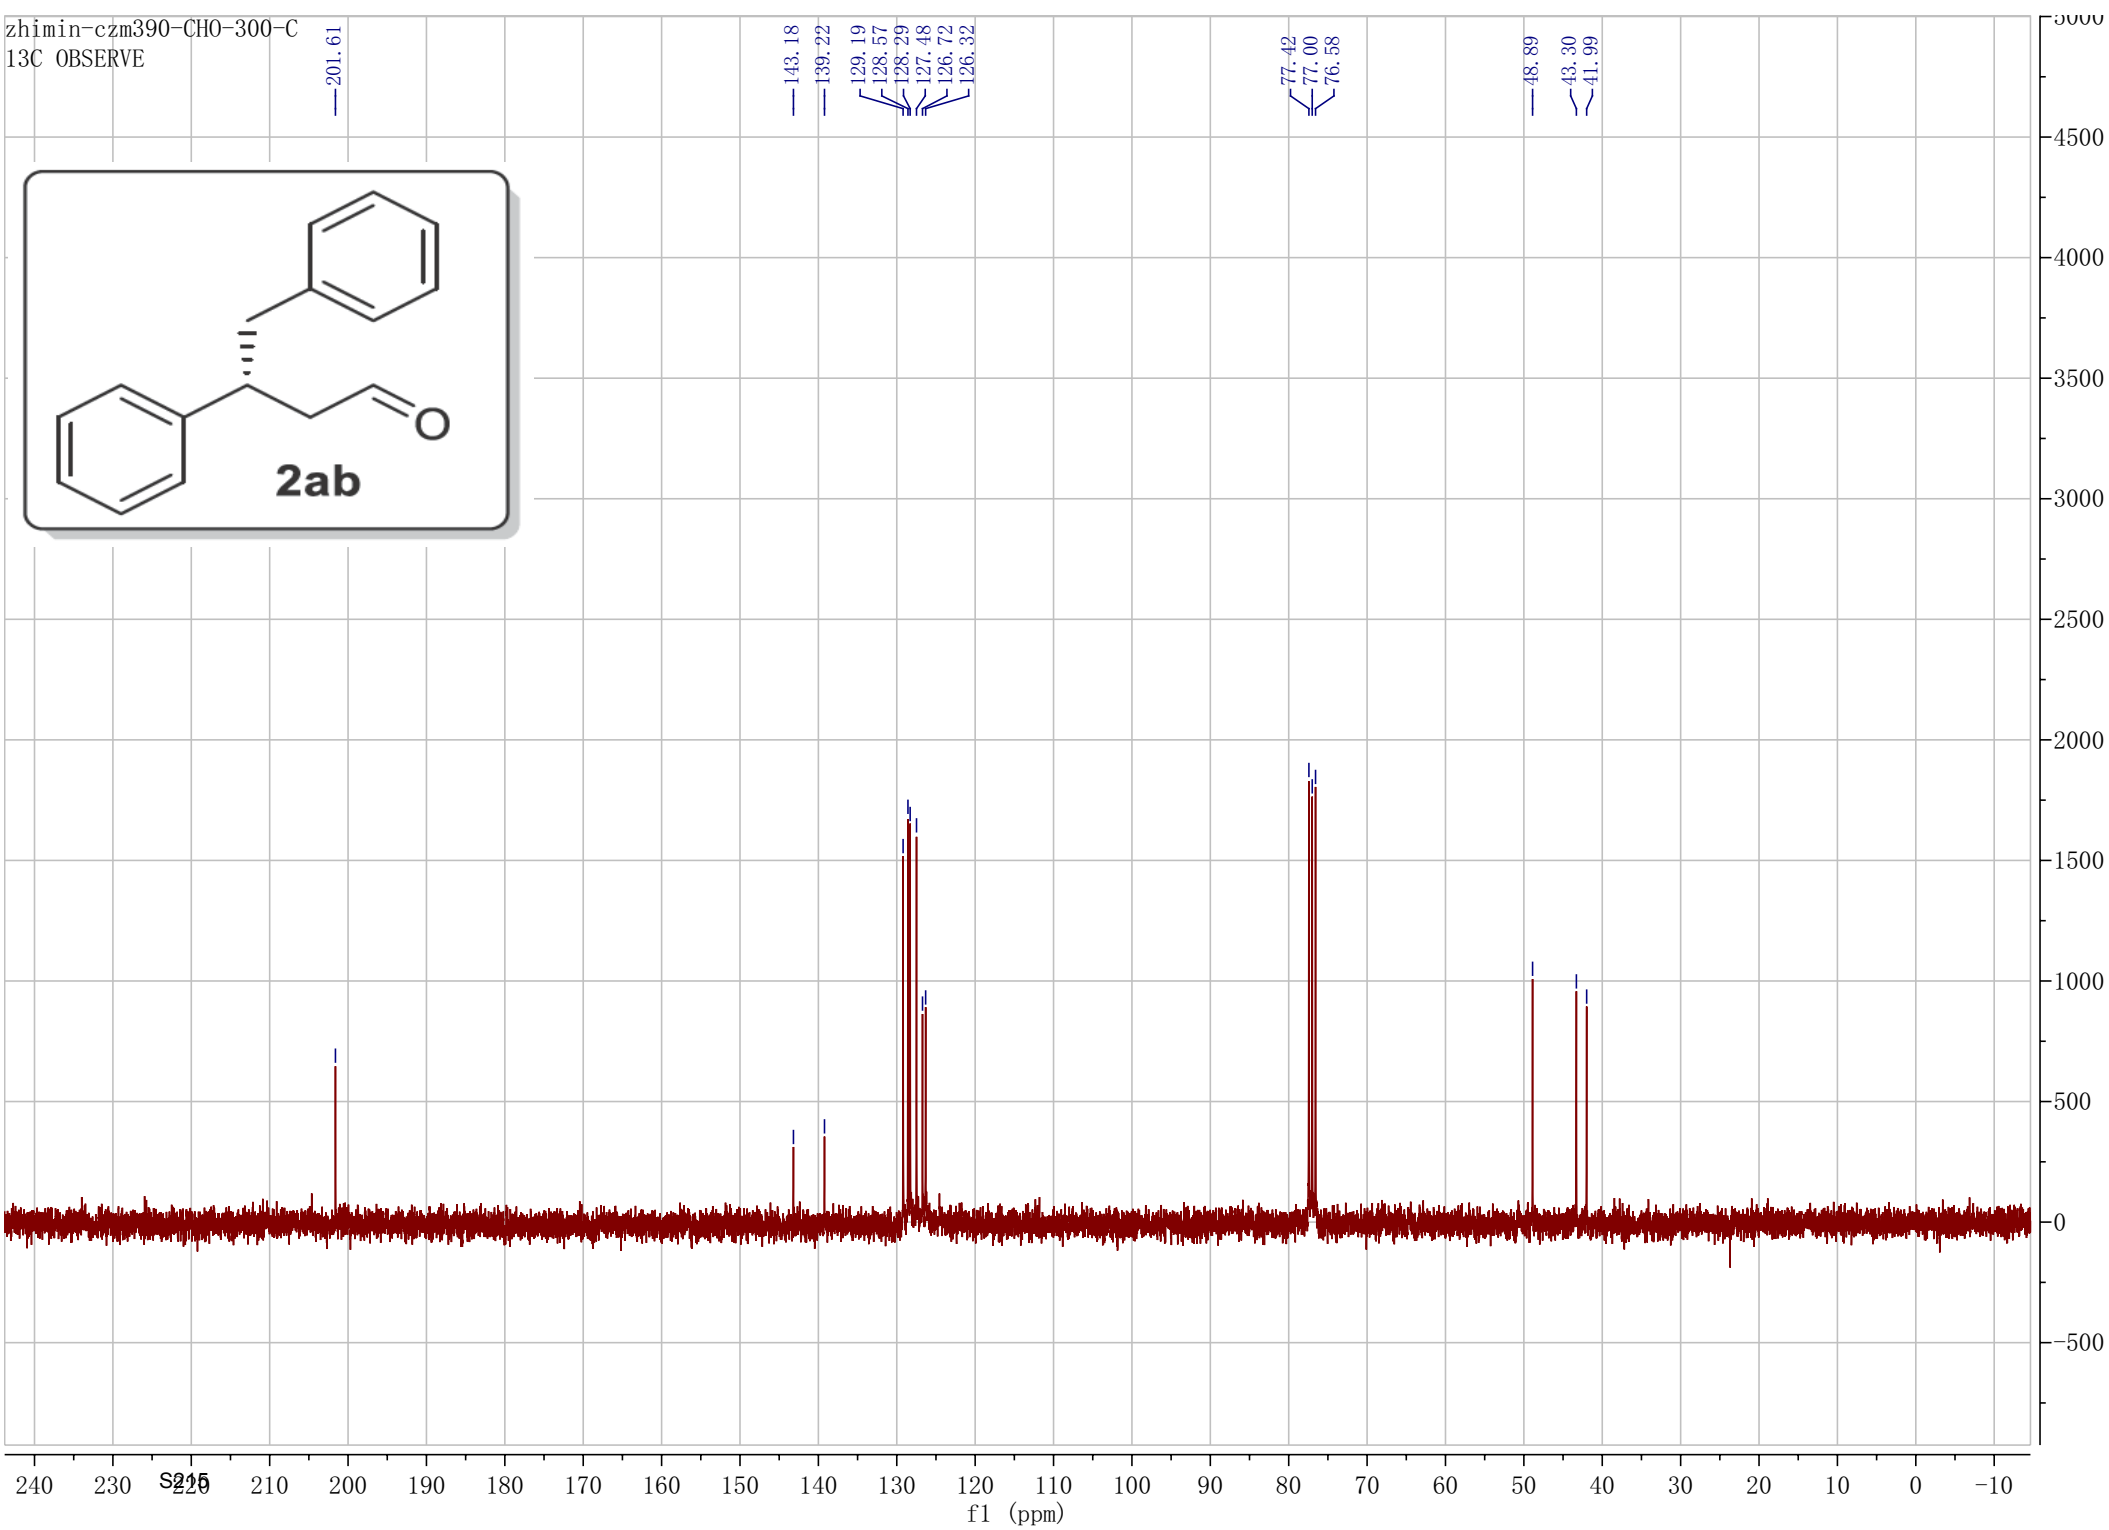

zhimin-8216-390-OH-500-H1  
STANDARD: PROTON PARAMETERS

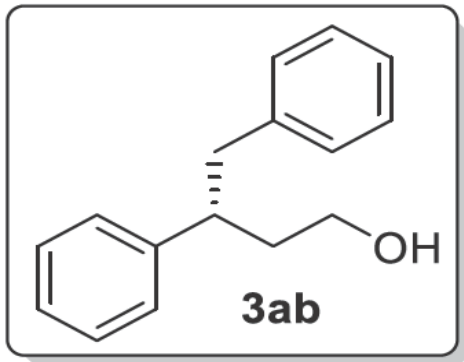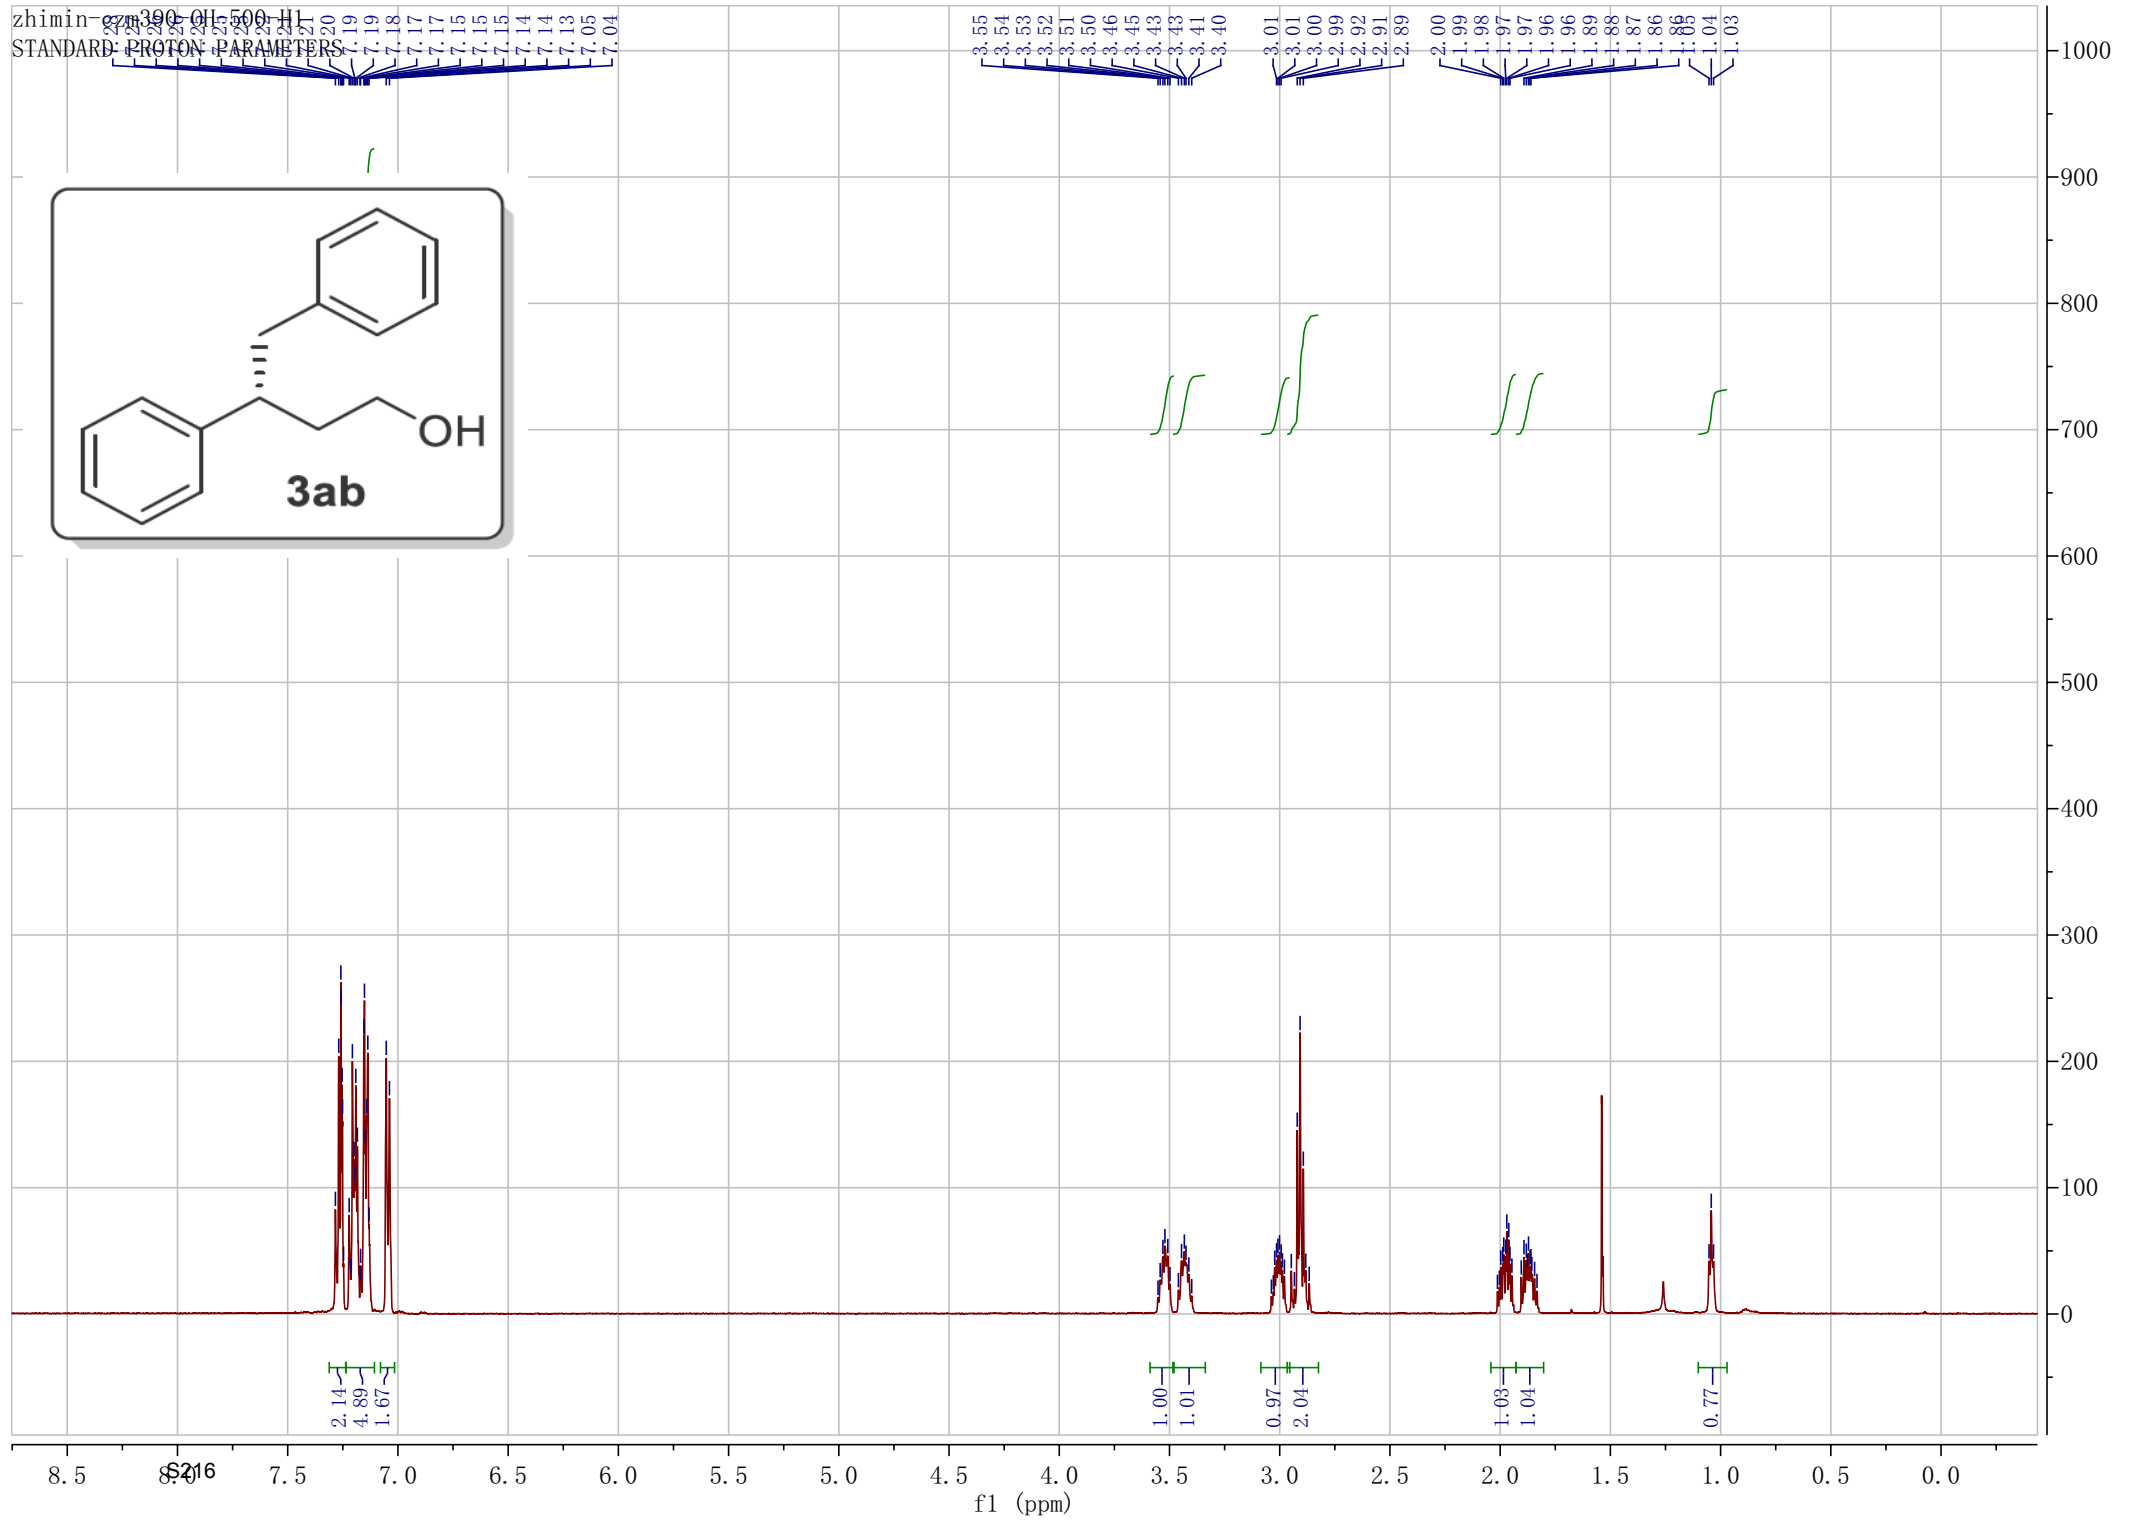

zhimin-390-OH-300-C1  
13C OBSERVE

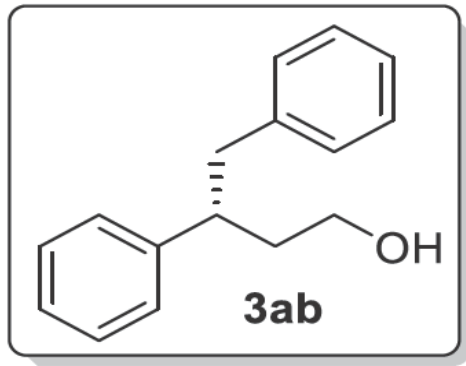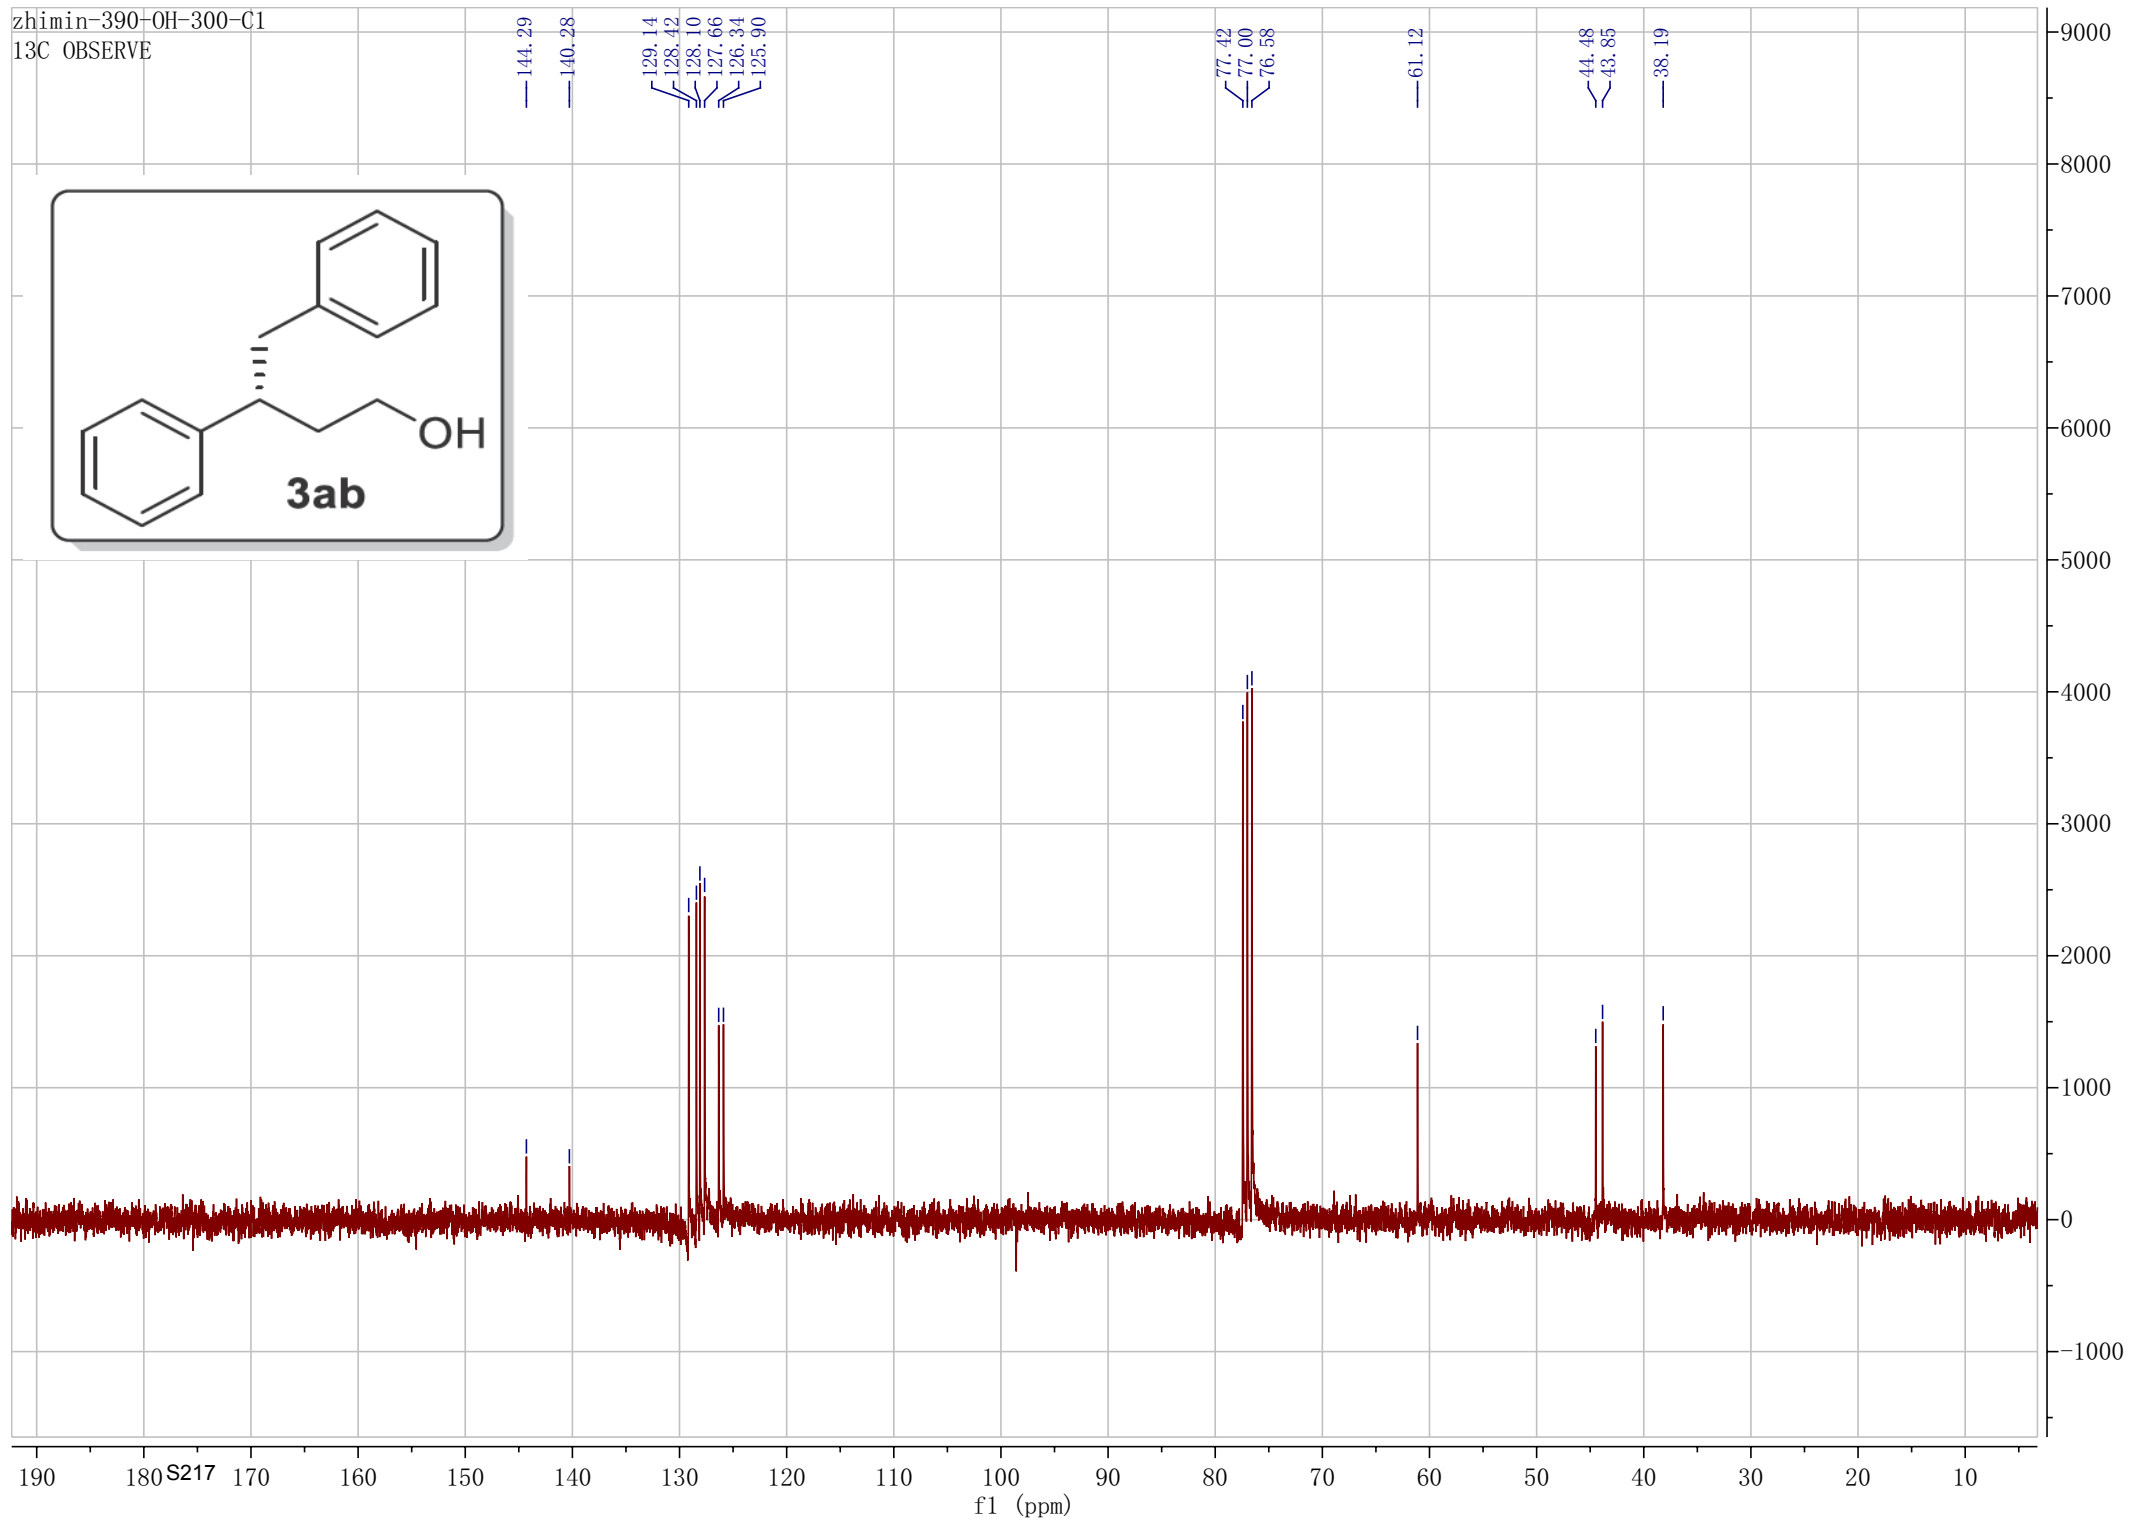

zhimin-czm434-CH0-300-H1  
UofUtah Unity 300-NMR  
STANDARD 1H OBSERVE

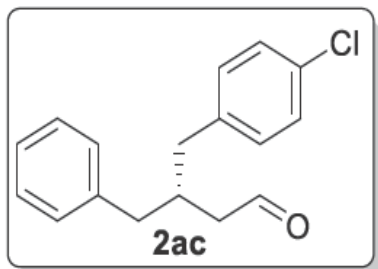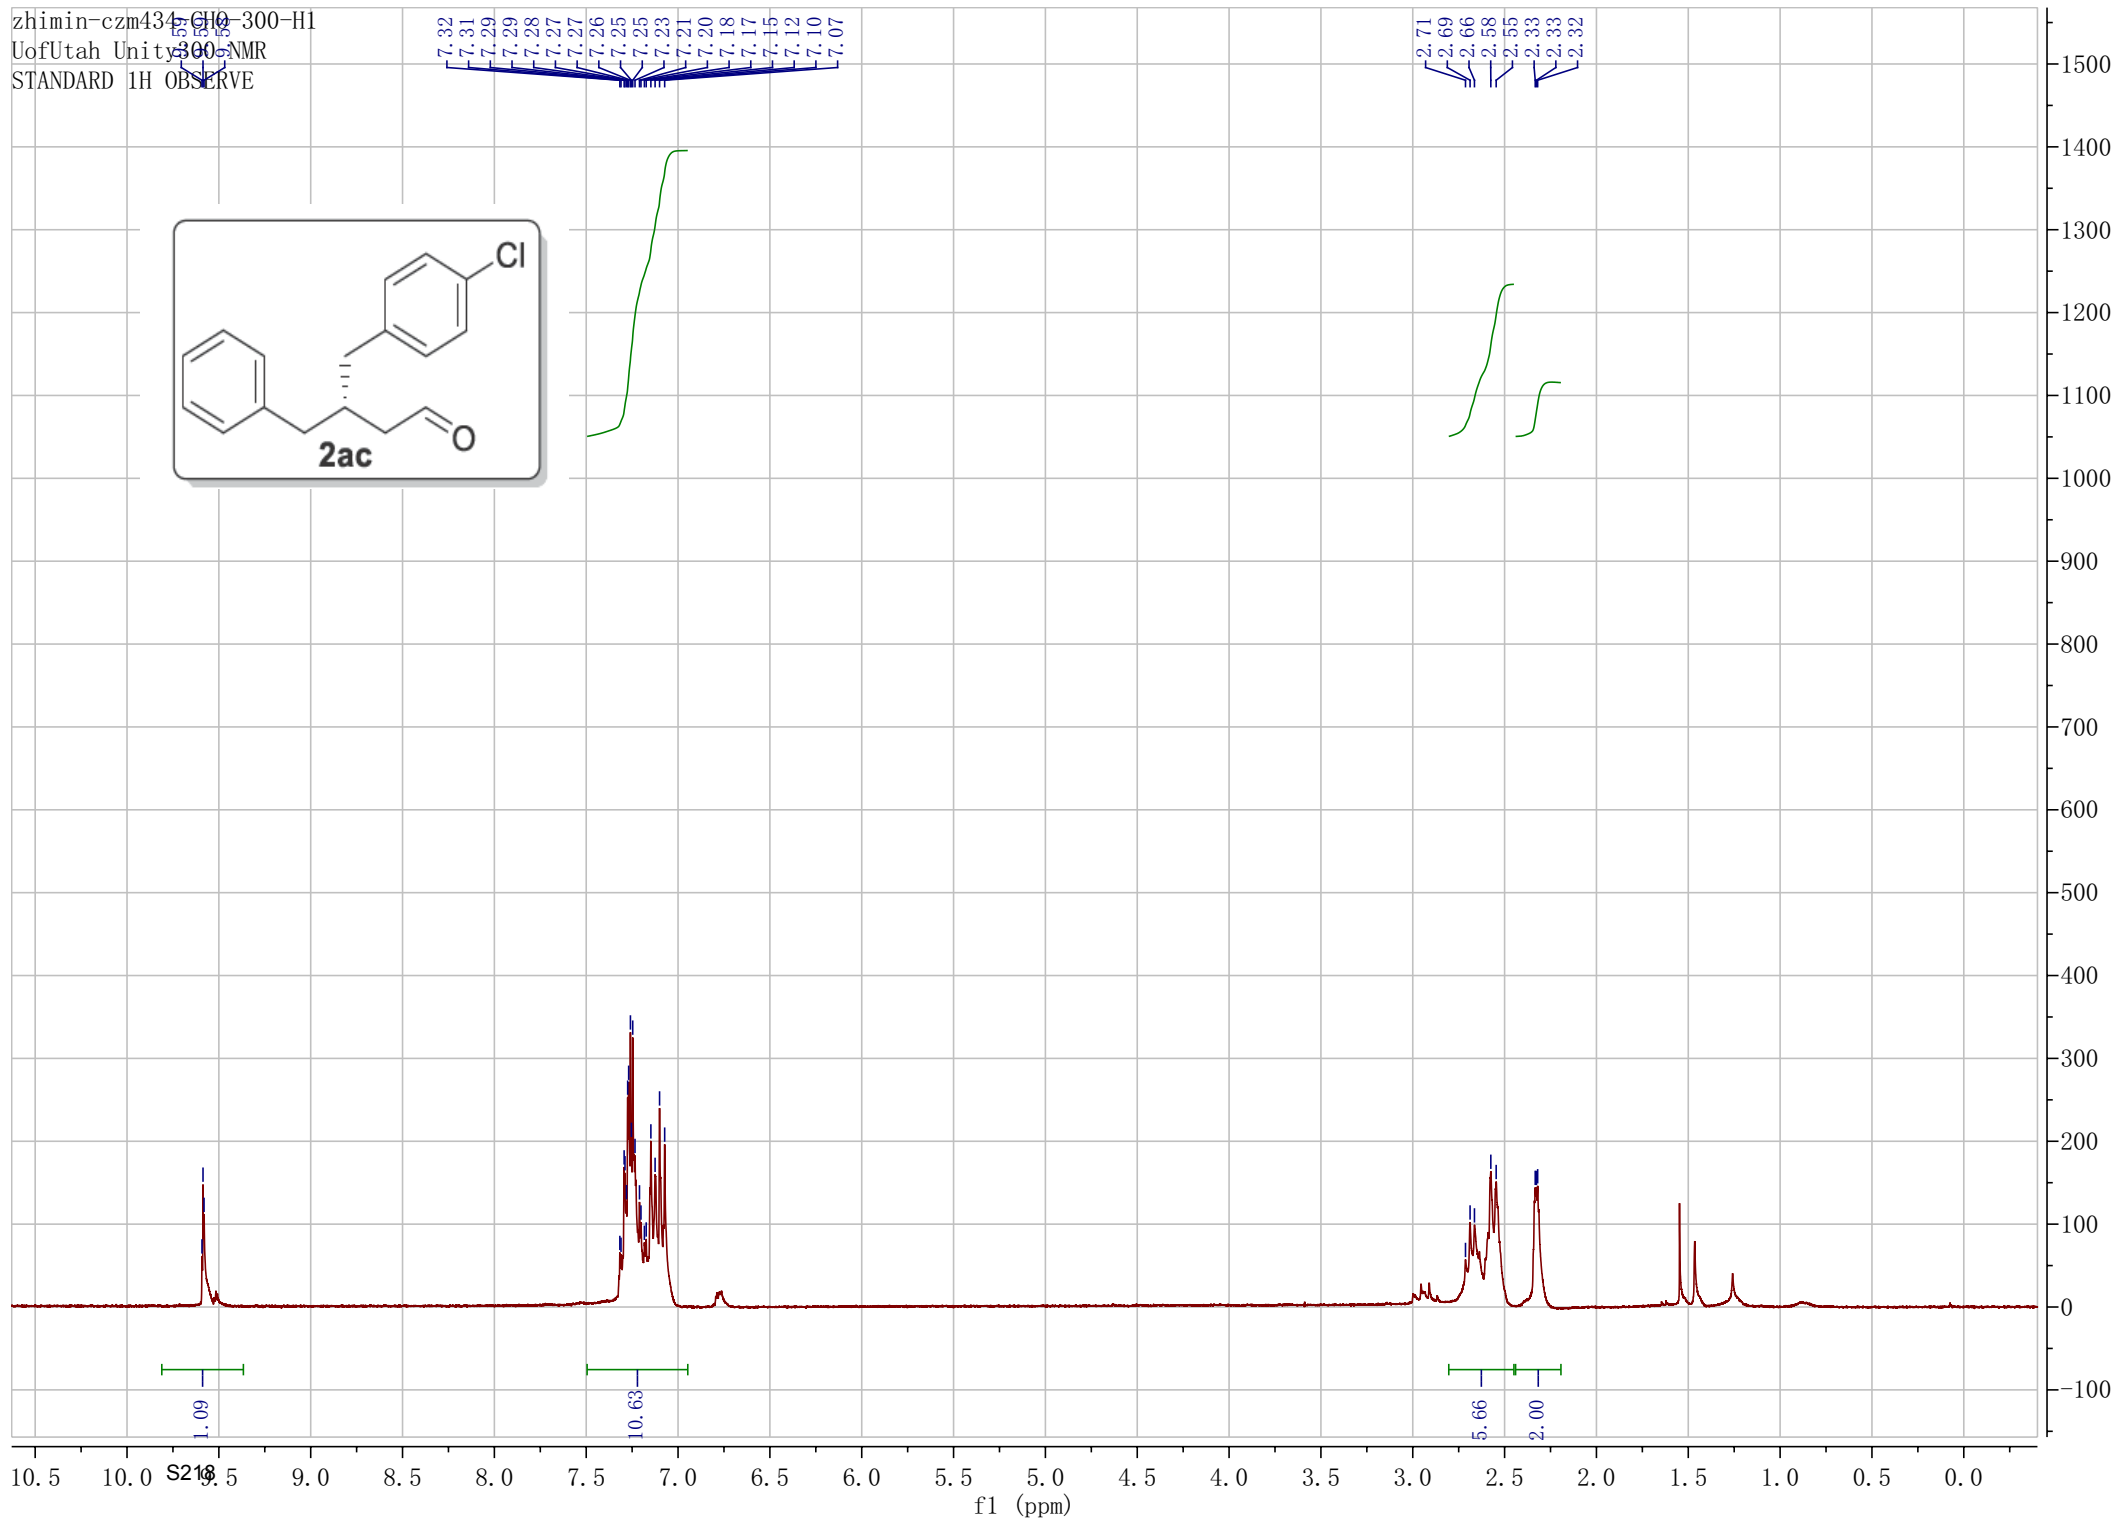



zhimin-czm391-300-CHO  
13C OBSERVE

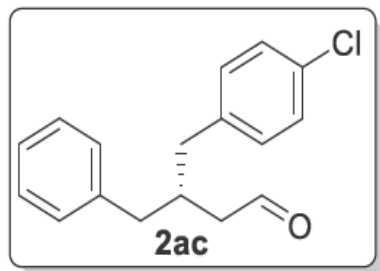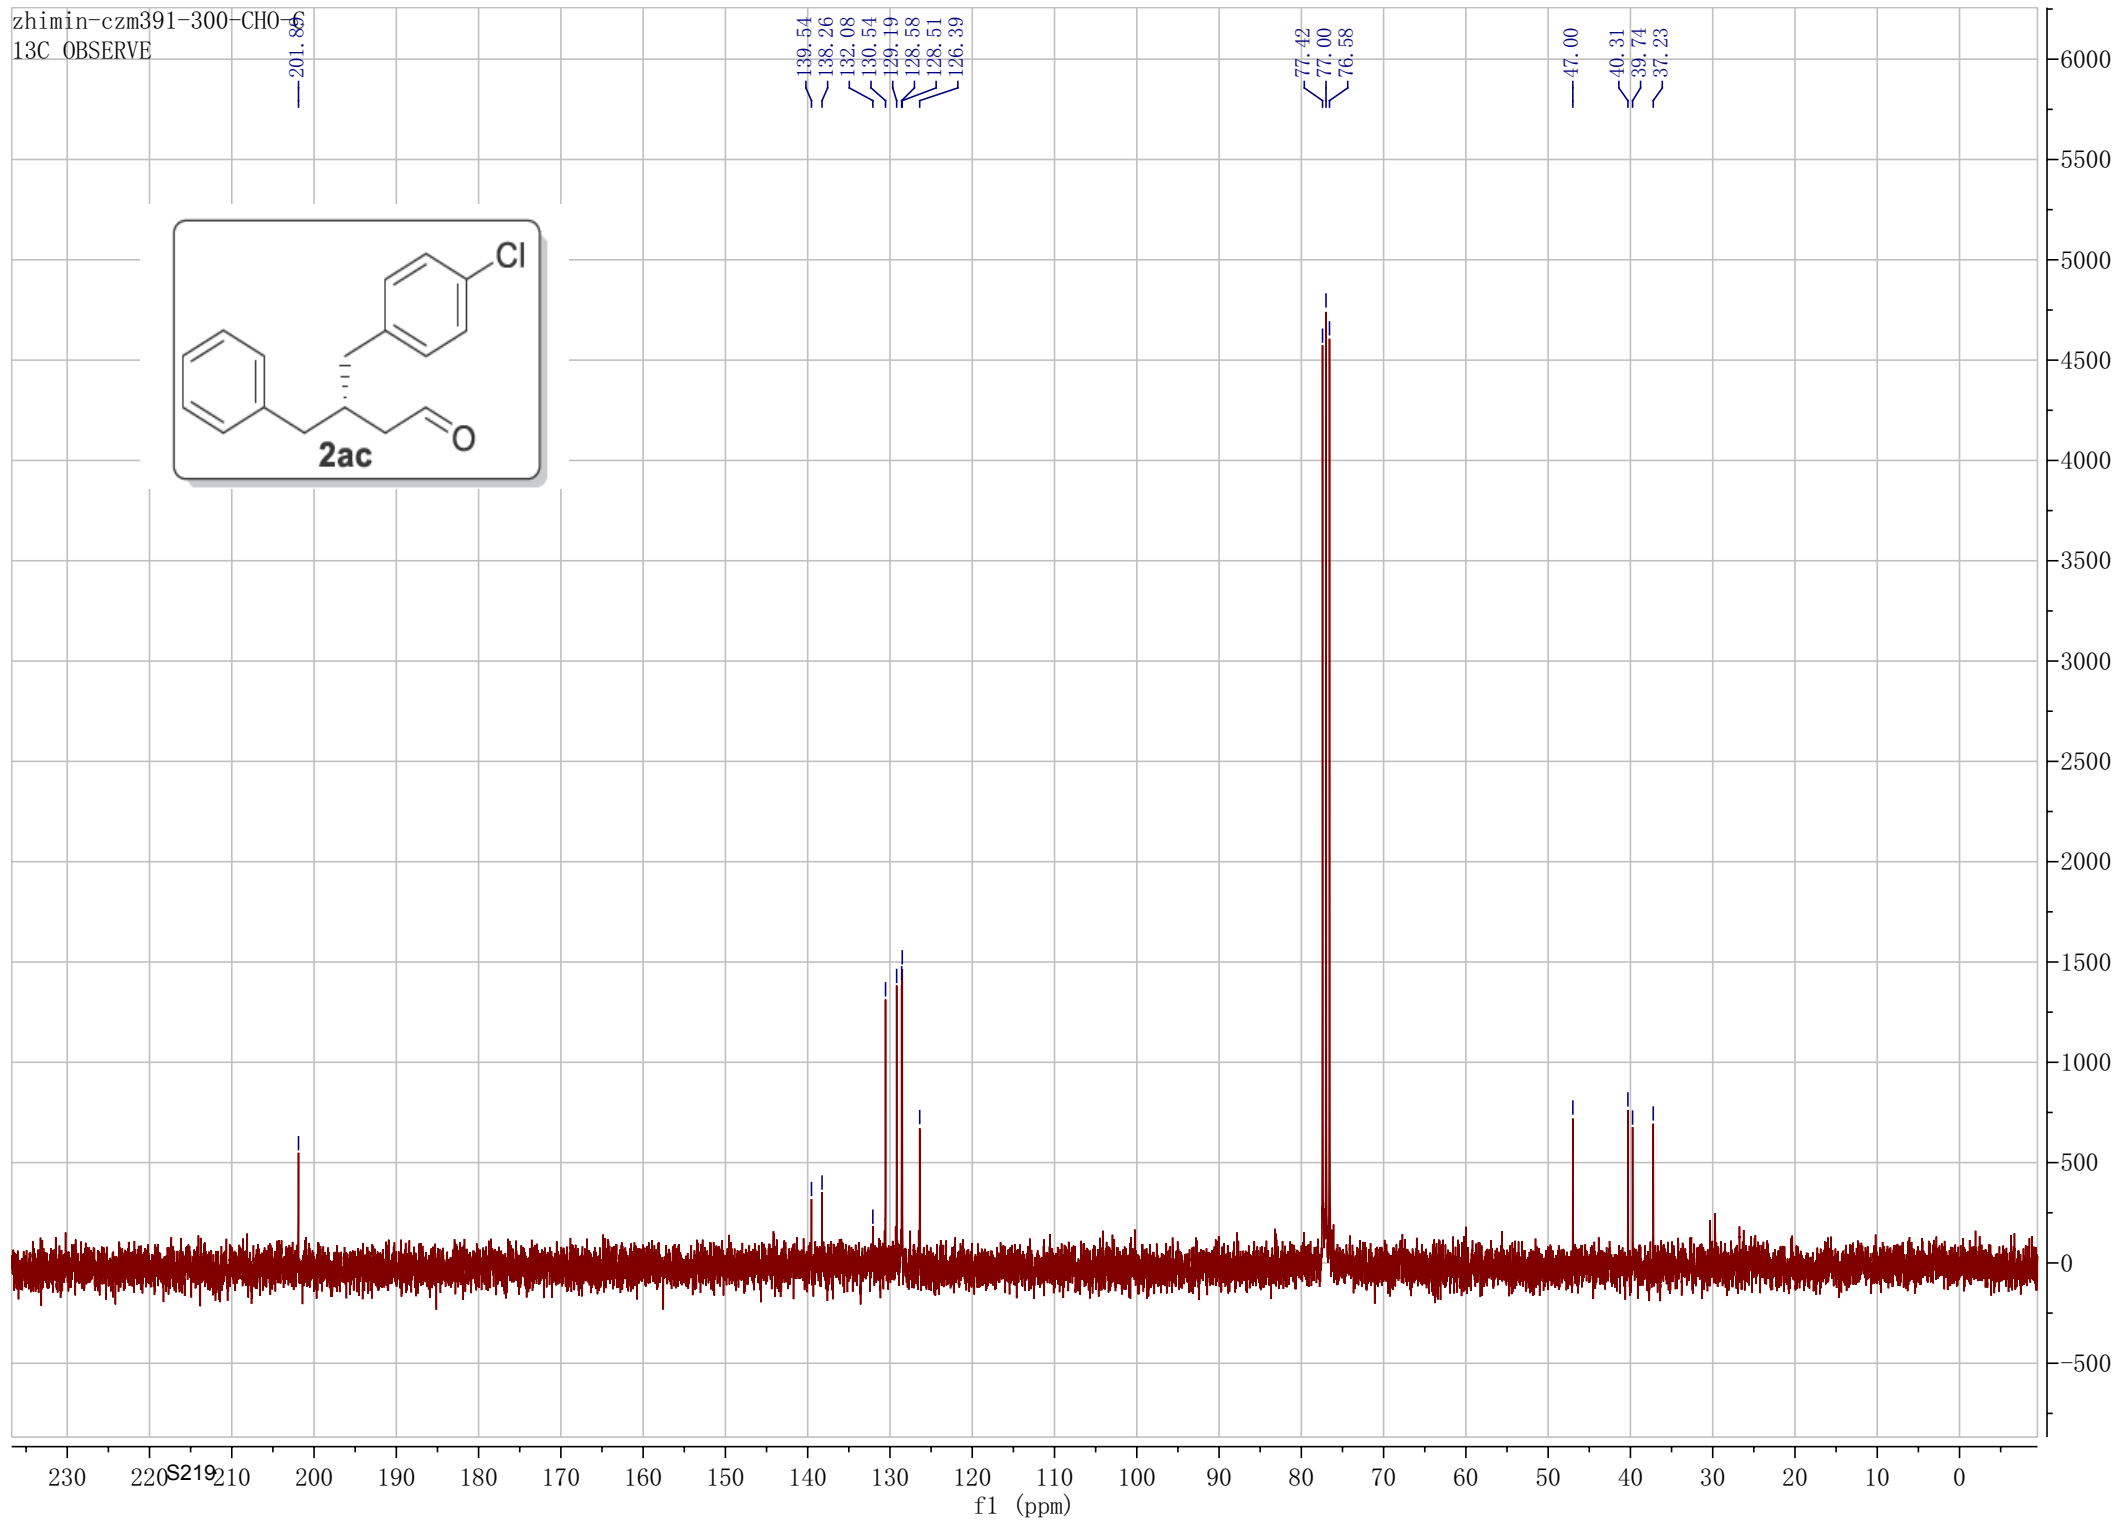

zhimin-czm393-OH-300-H  
UofUtah Unity300 NMR  
STANDARD 1H OBSERVE

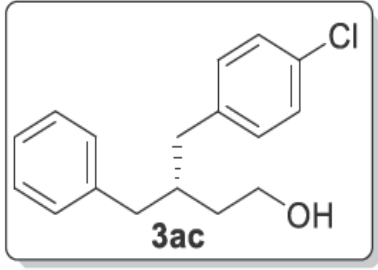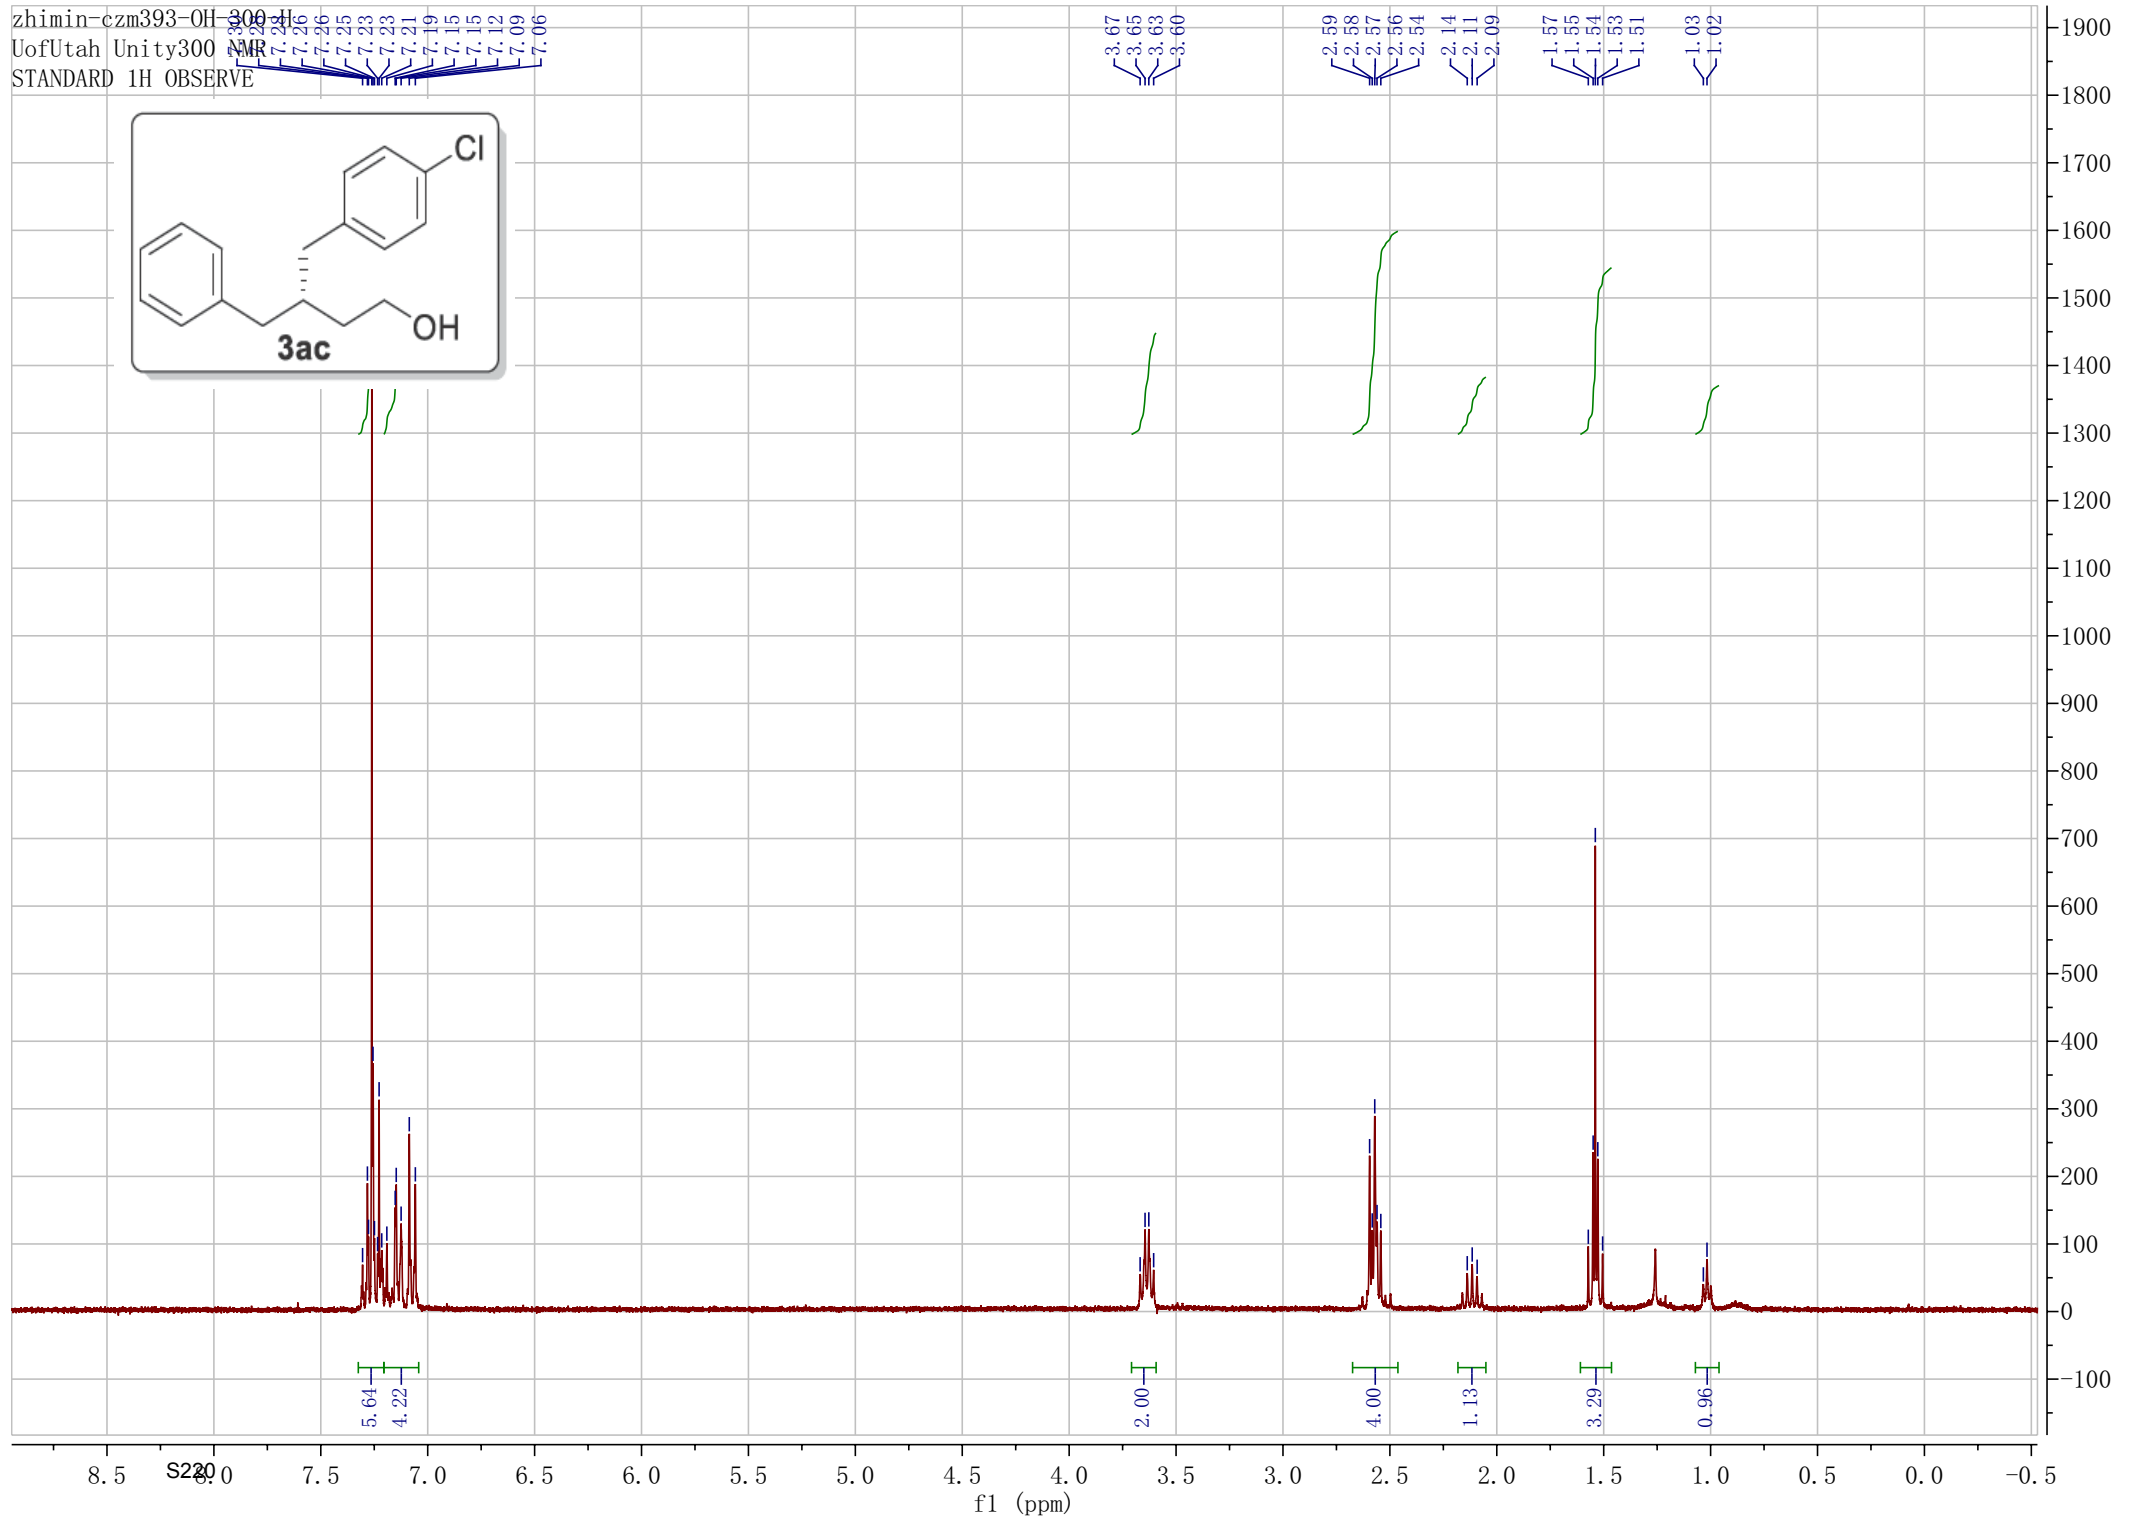

zhimin-czm393-OH-300-C2  
13C OBSERVE

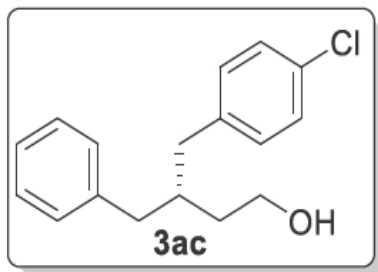

140.56  
139.29  
131.64  
130.47  
129.13  
128.38  
128.34  
126.00

77.42  
77.00  
76.58

60.86

40.46  
39.87  
38.64  
36.13

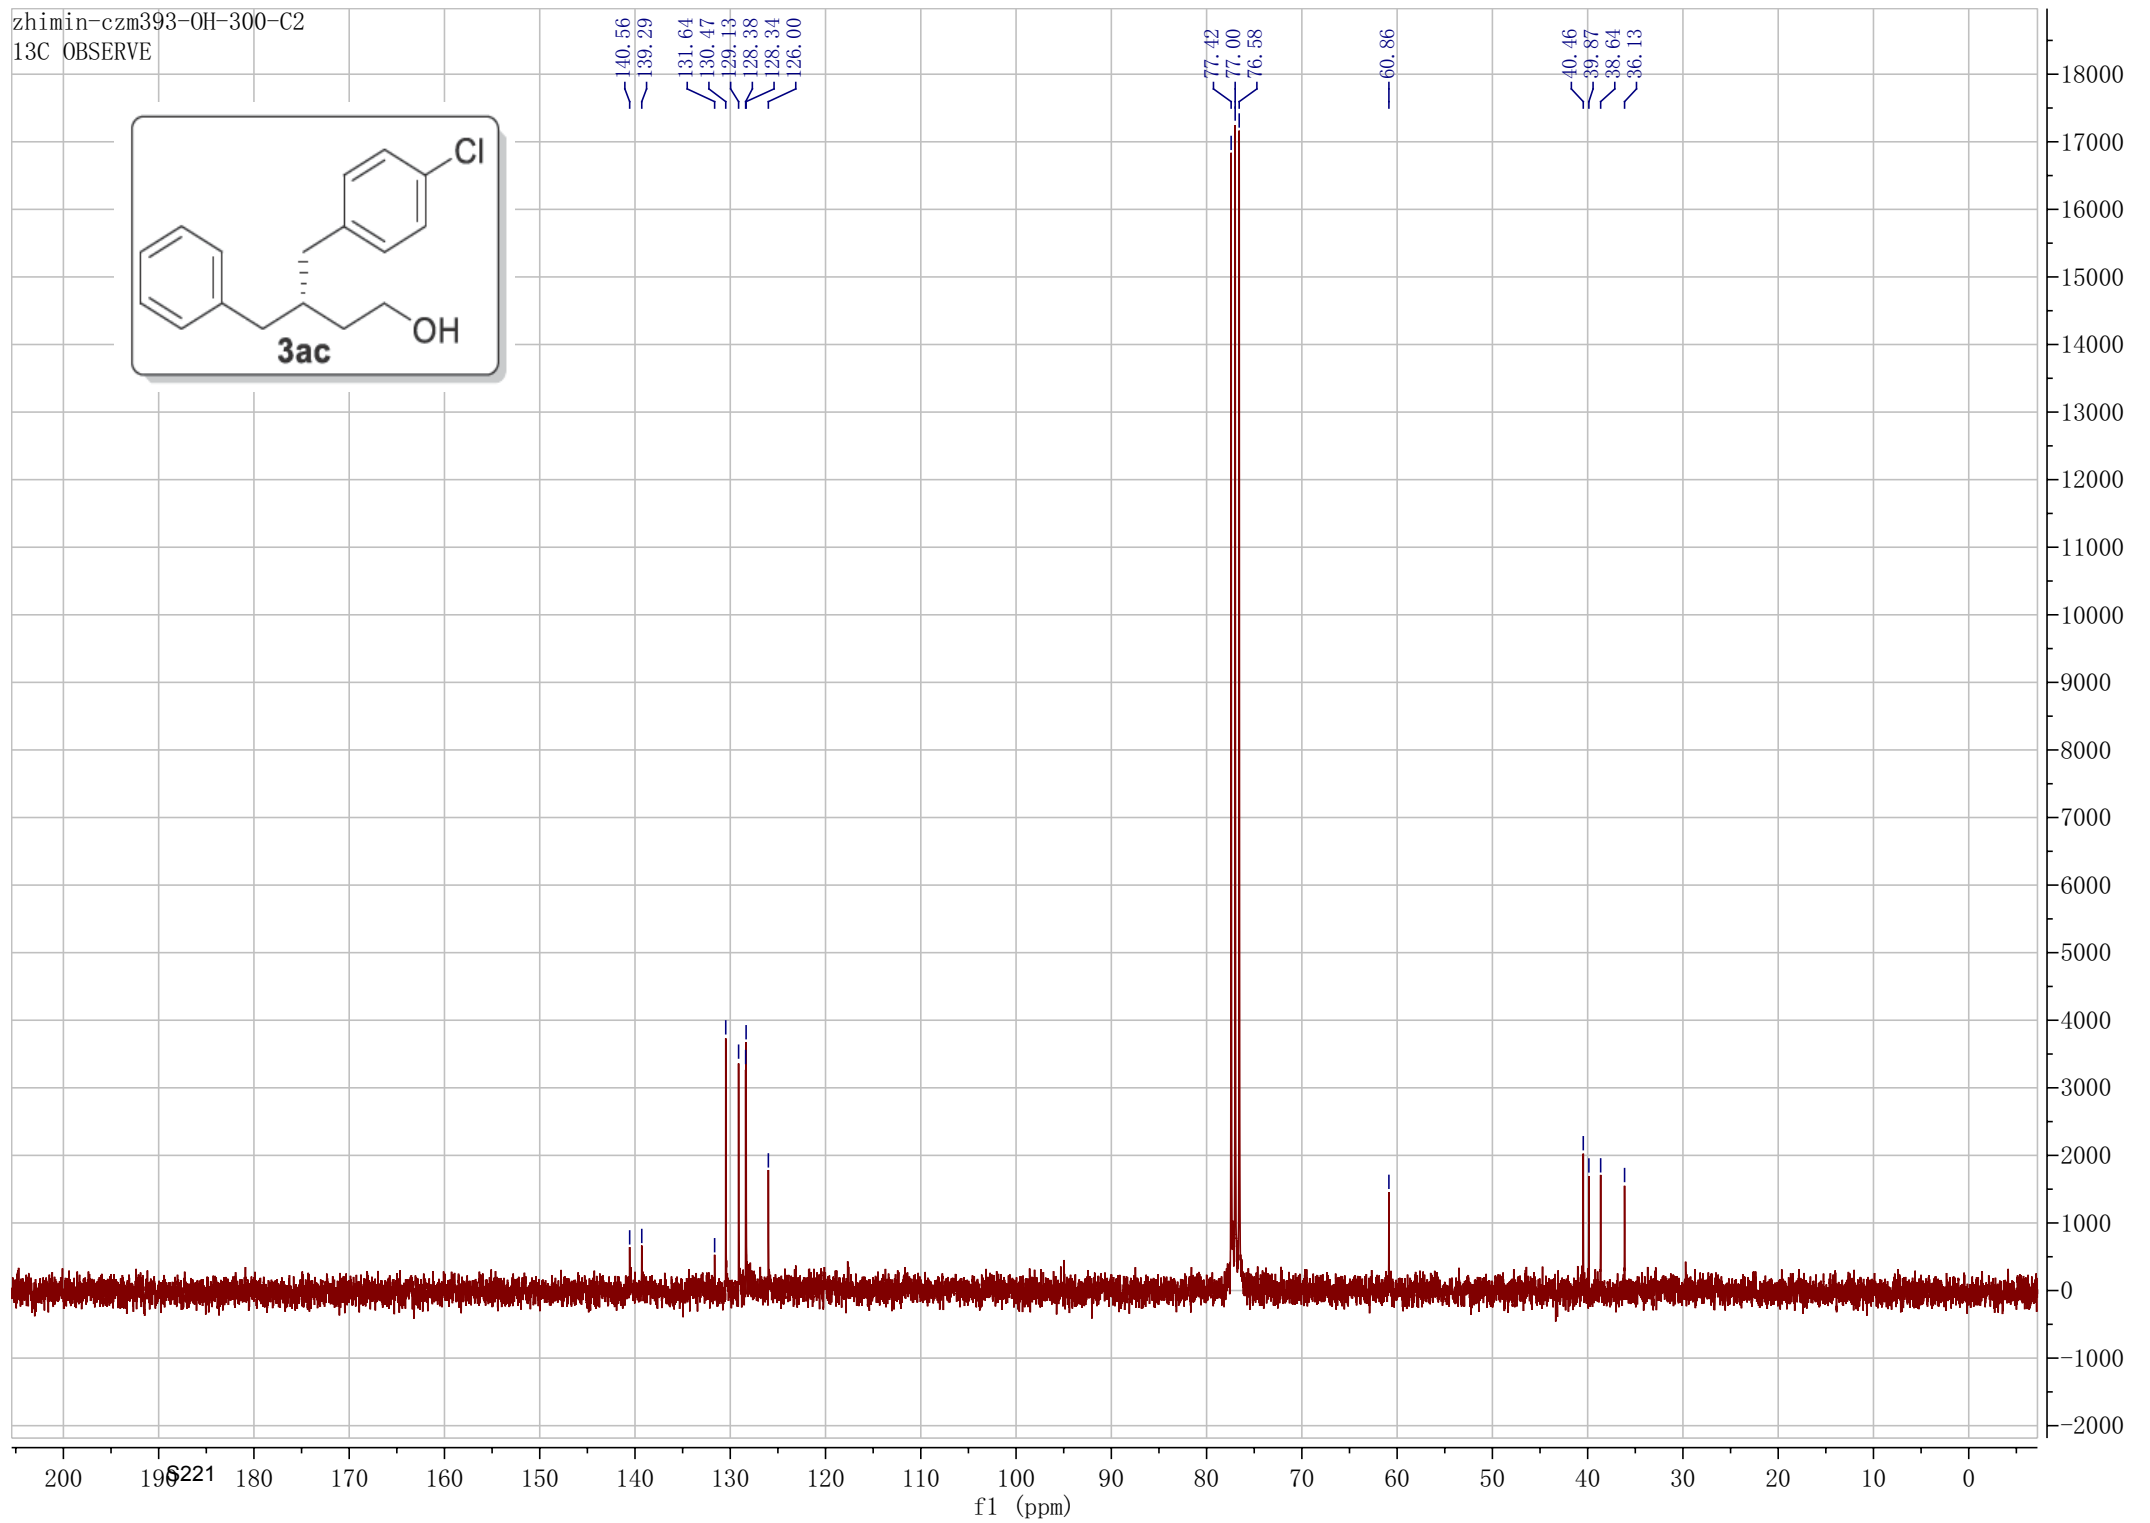

zhimin-czm1p162-300-H  
UofUtah Unity300 NMR  
STANDARD 1H OBSERVE

7.26  
7.26  
7.25

4.84  
4.75

3.71  
3.69  
3.67  
3.65

2.31  
2.31  
2.29  
2.28  
2.27

1.77  
1.73  
1.71  
1.69  
1.65

1.52  
1.27  
1.23  
1.19

1.15  
1.11  
1.10  
1.06

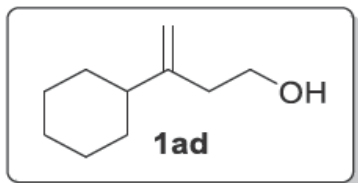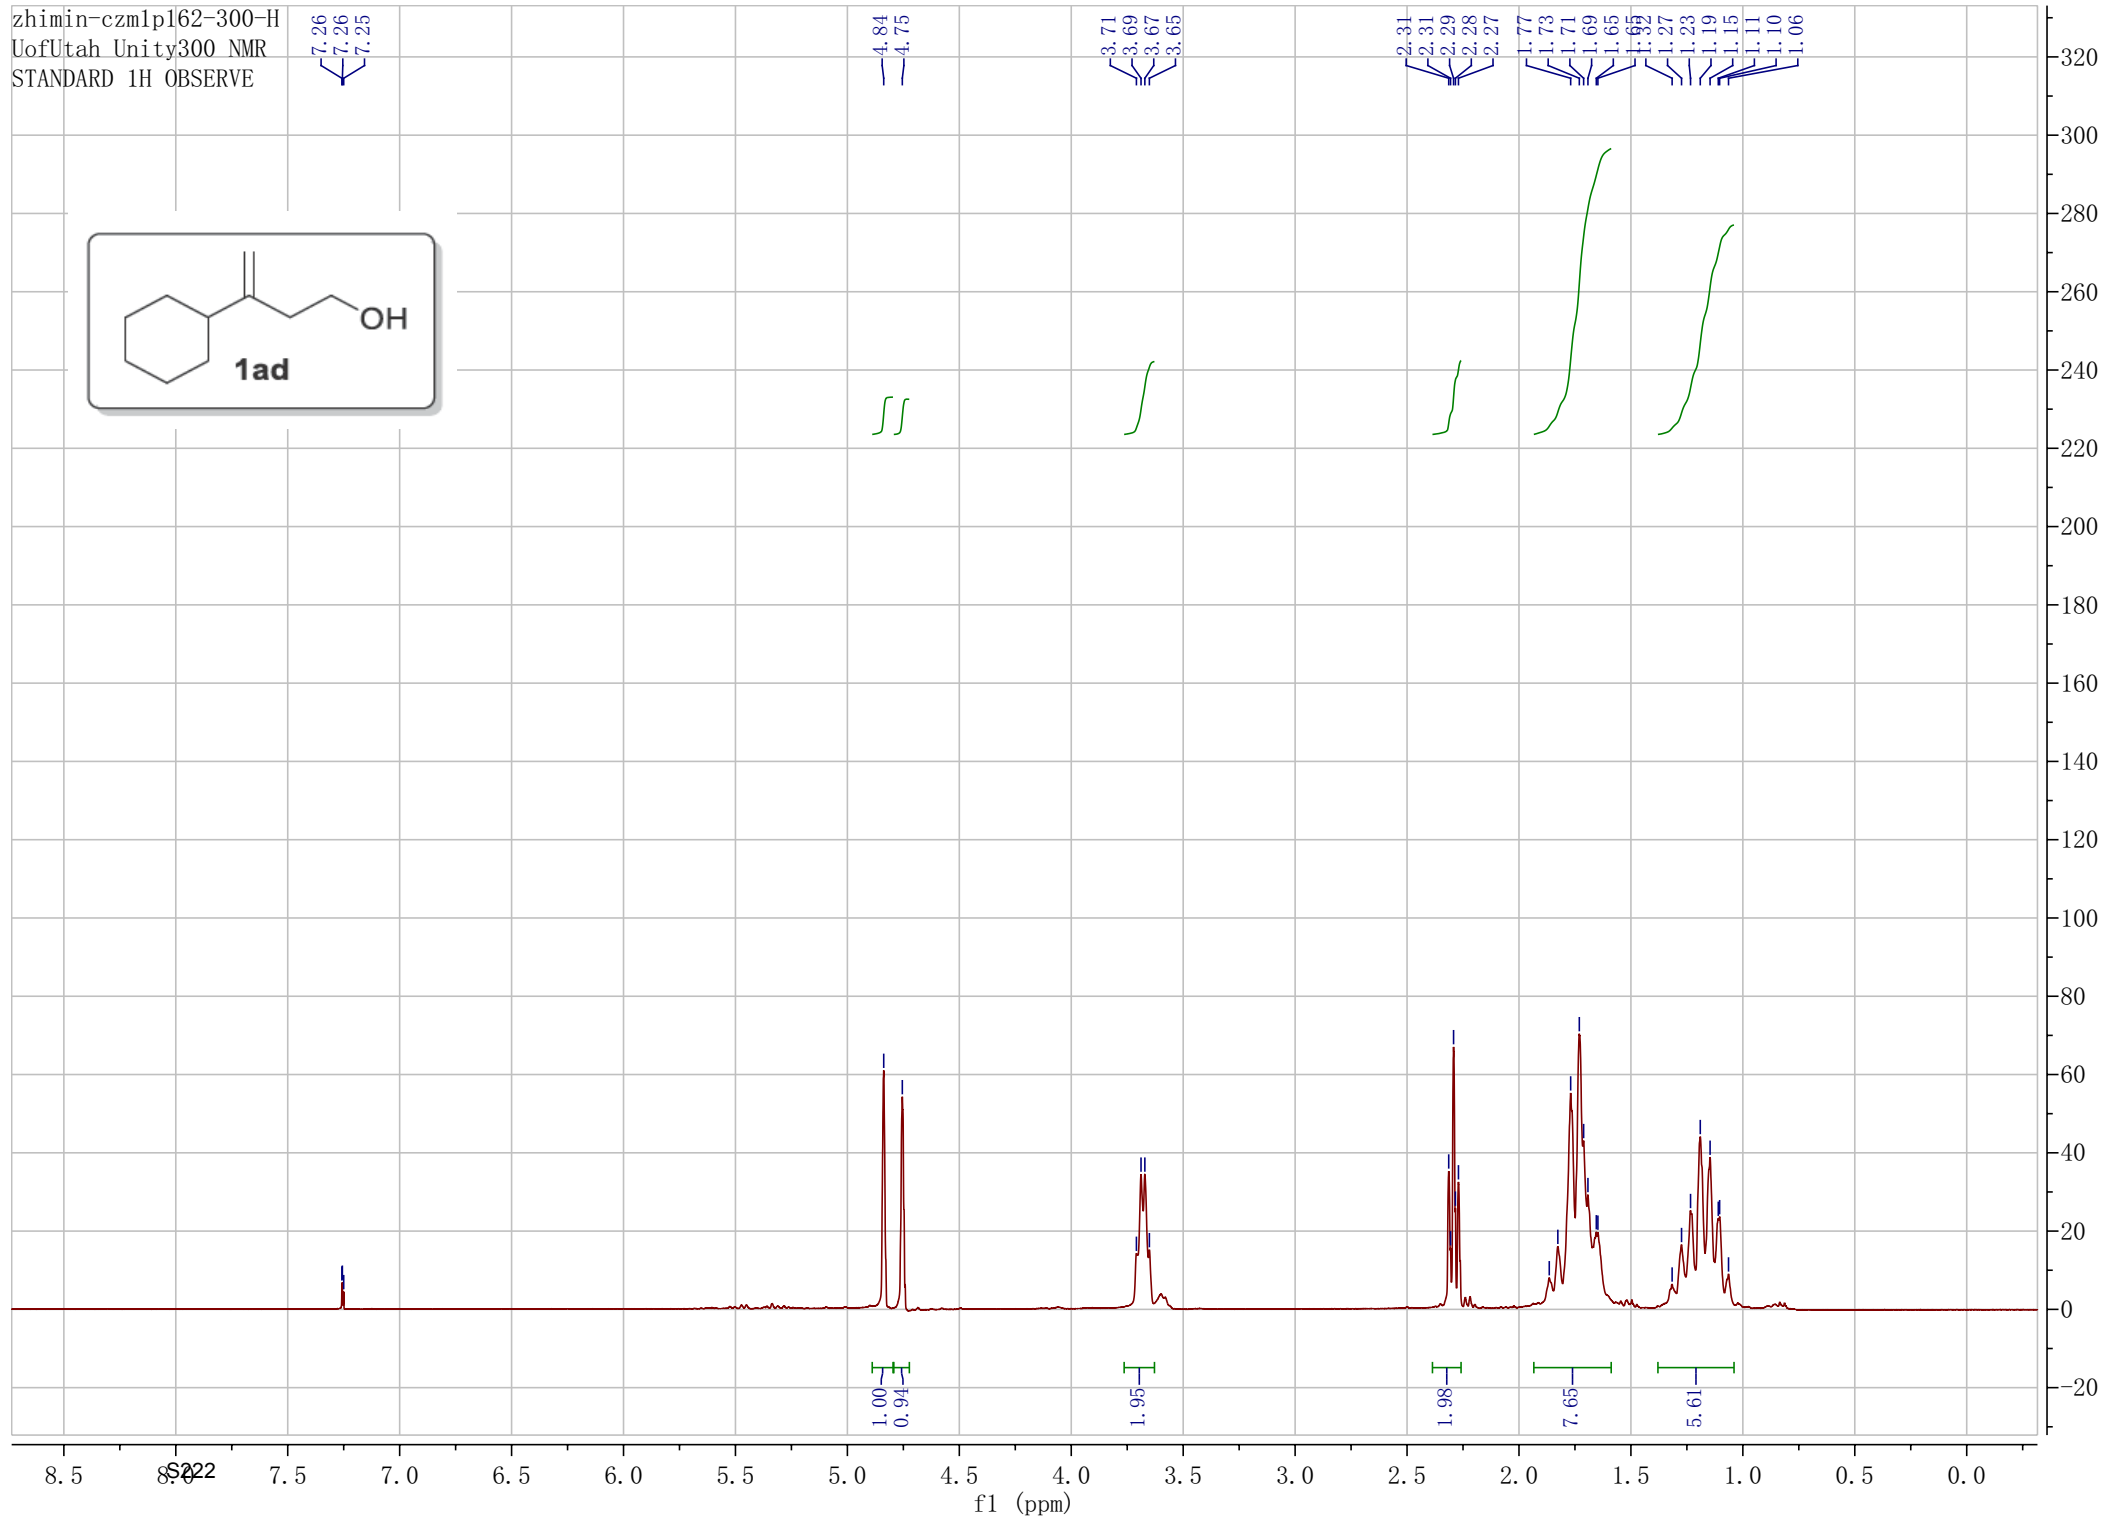

1.00  
0.94

1.95

1.98

7.65

5.61

8.5 8.0 7.5 7.0 6.5 6.0 5.5 5.0 4.5 4.0 3.5 3.0 2.5 2.0 1.5 1.0 0.5 0.0  
f1 (ppm)

zhimin-czm1p162-300-C  
13C-OBSERVE

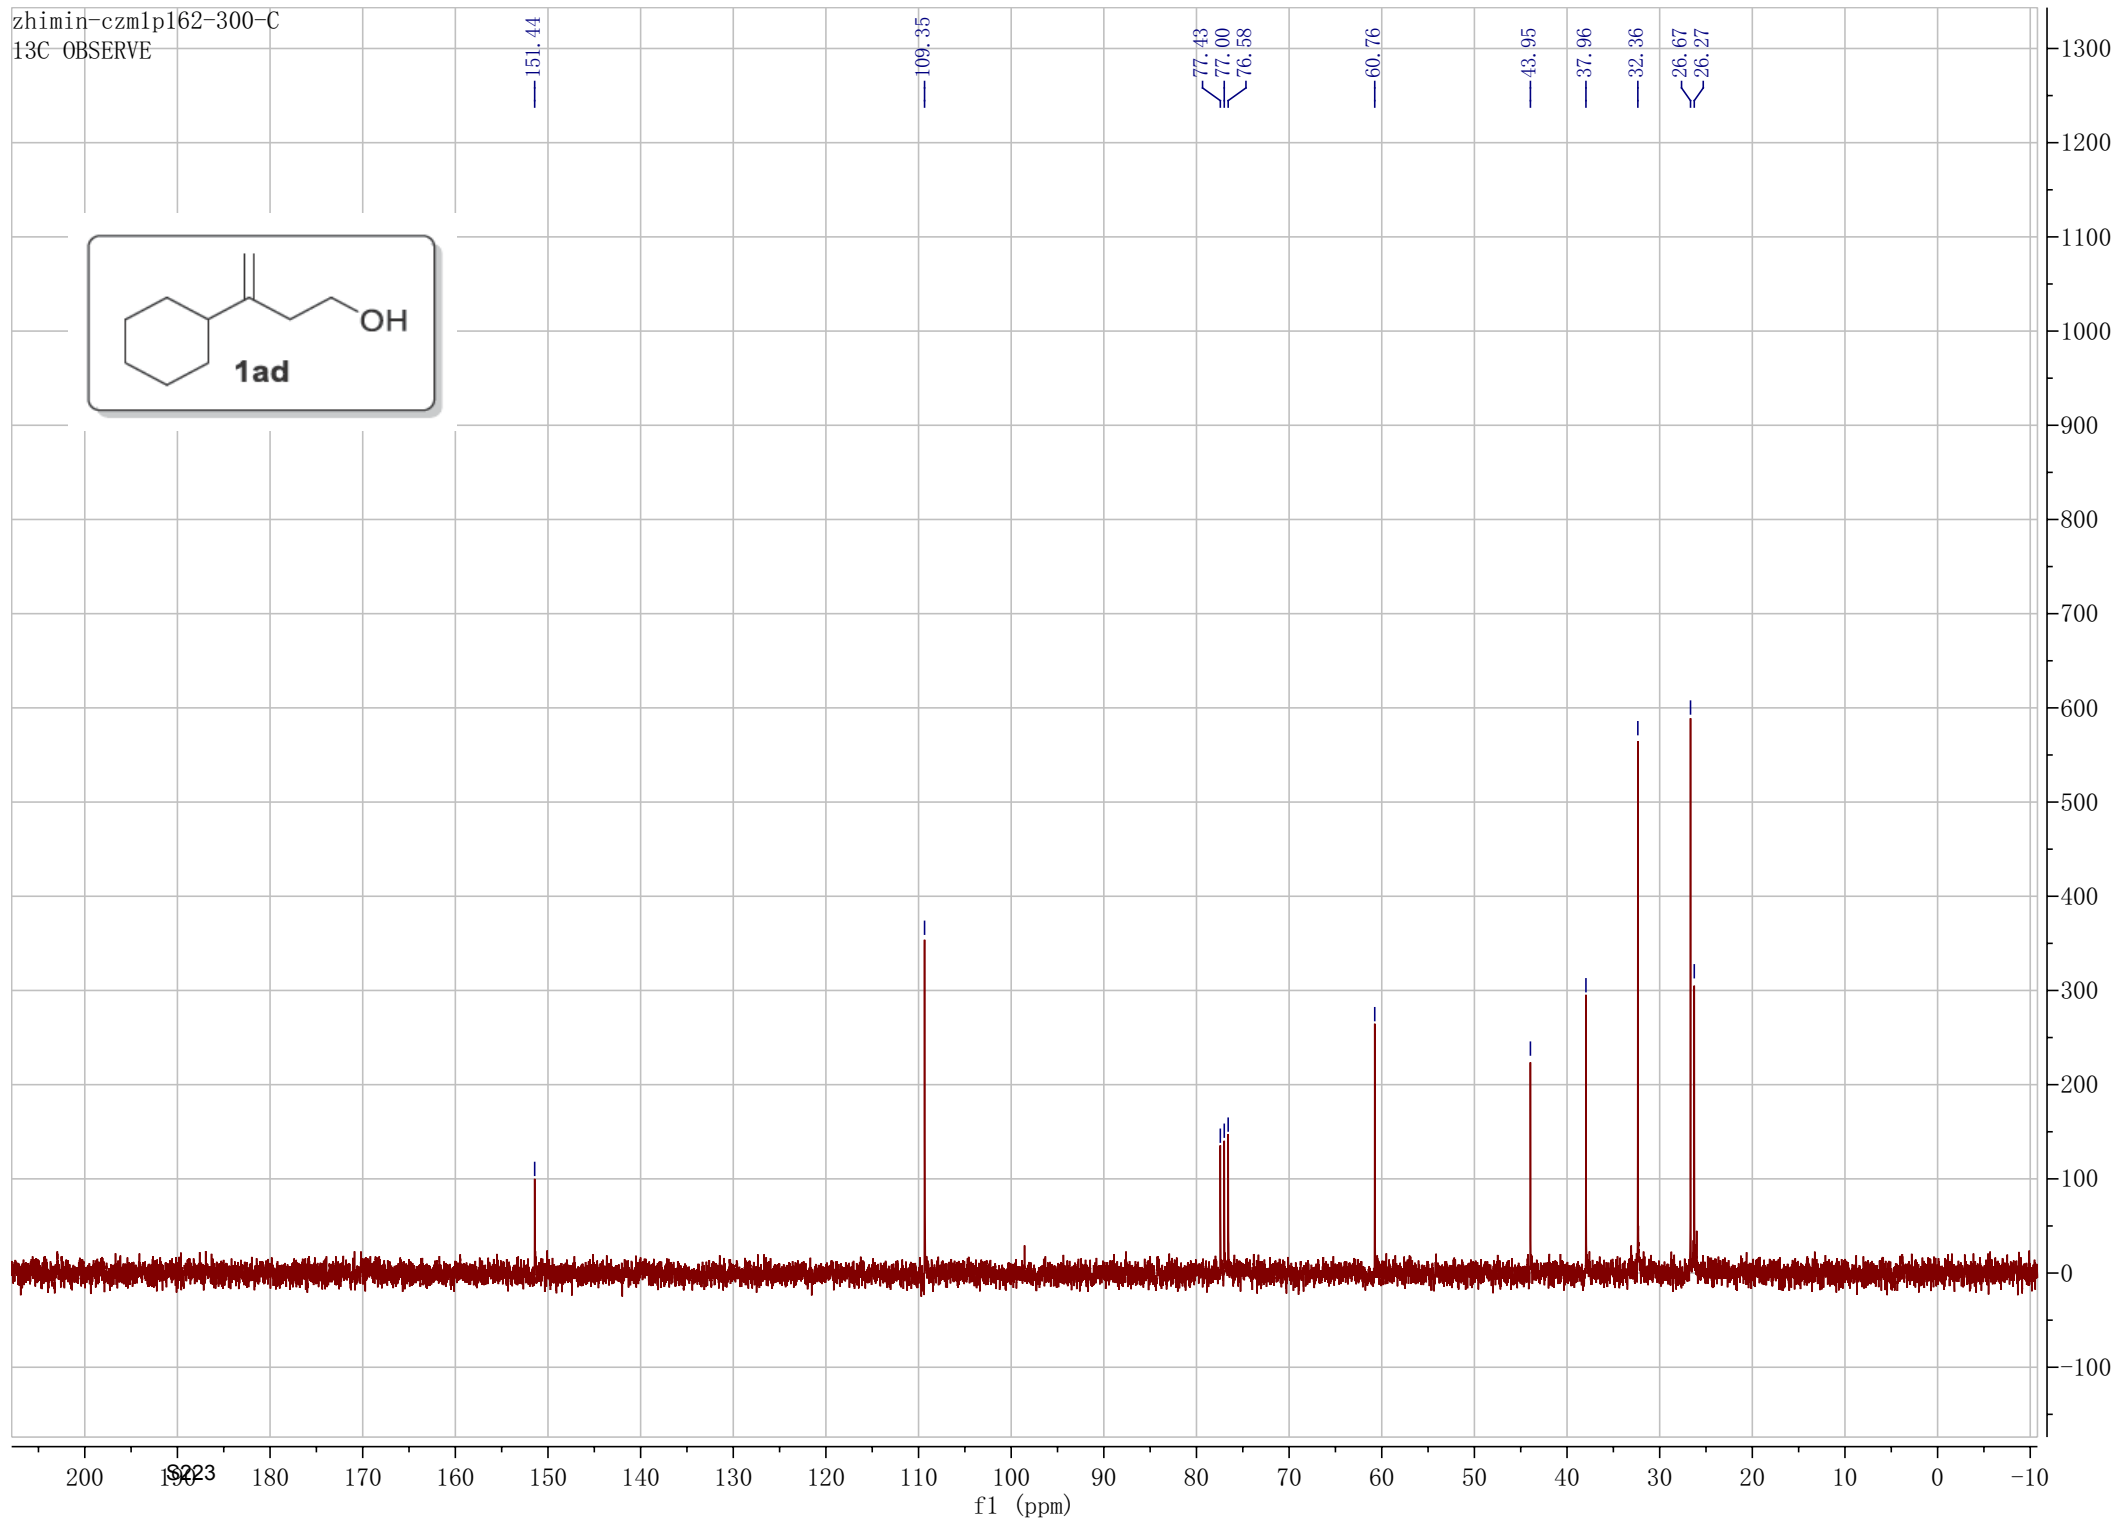

zhimin-czm433-CHO-500-H  
STANDARD PROTON PARAMETERS

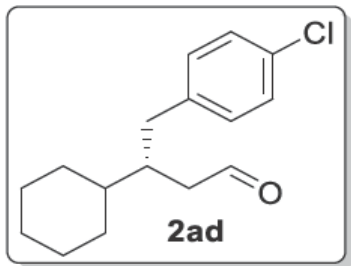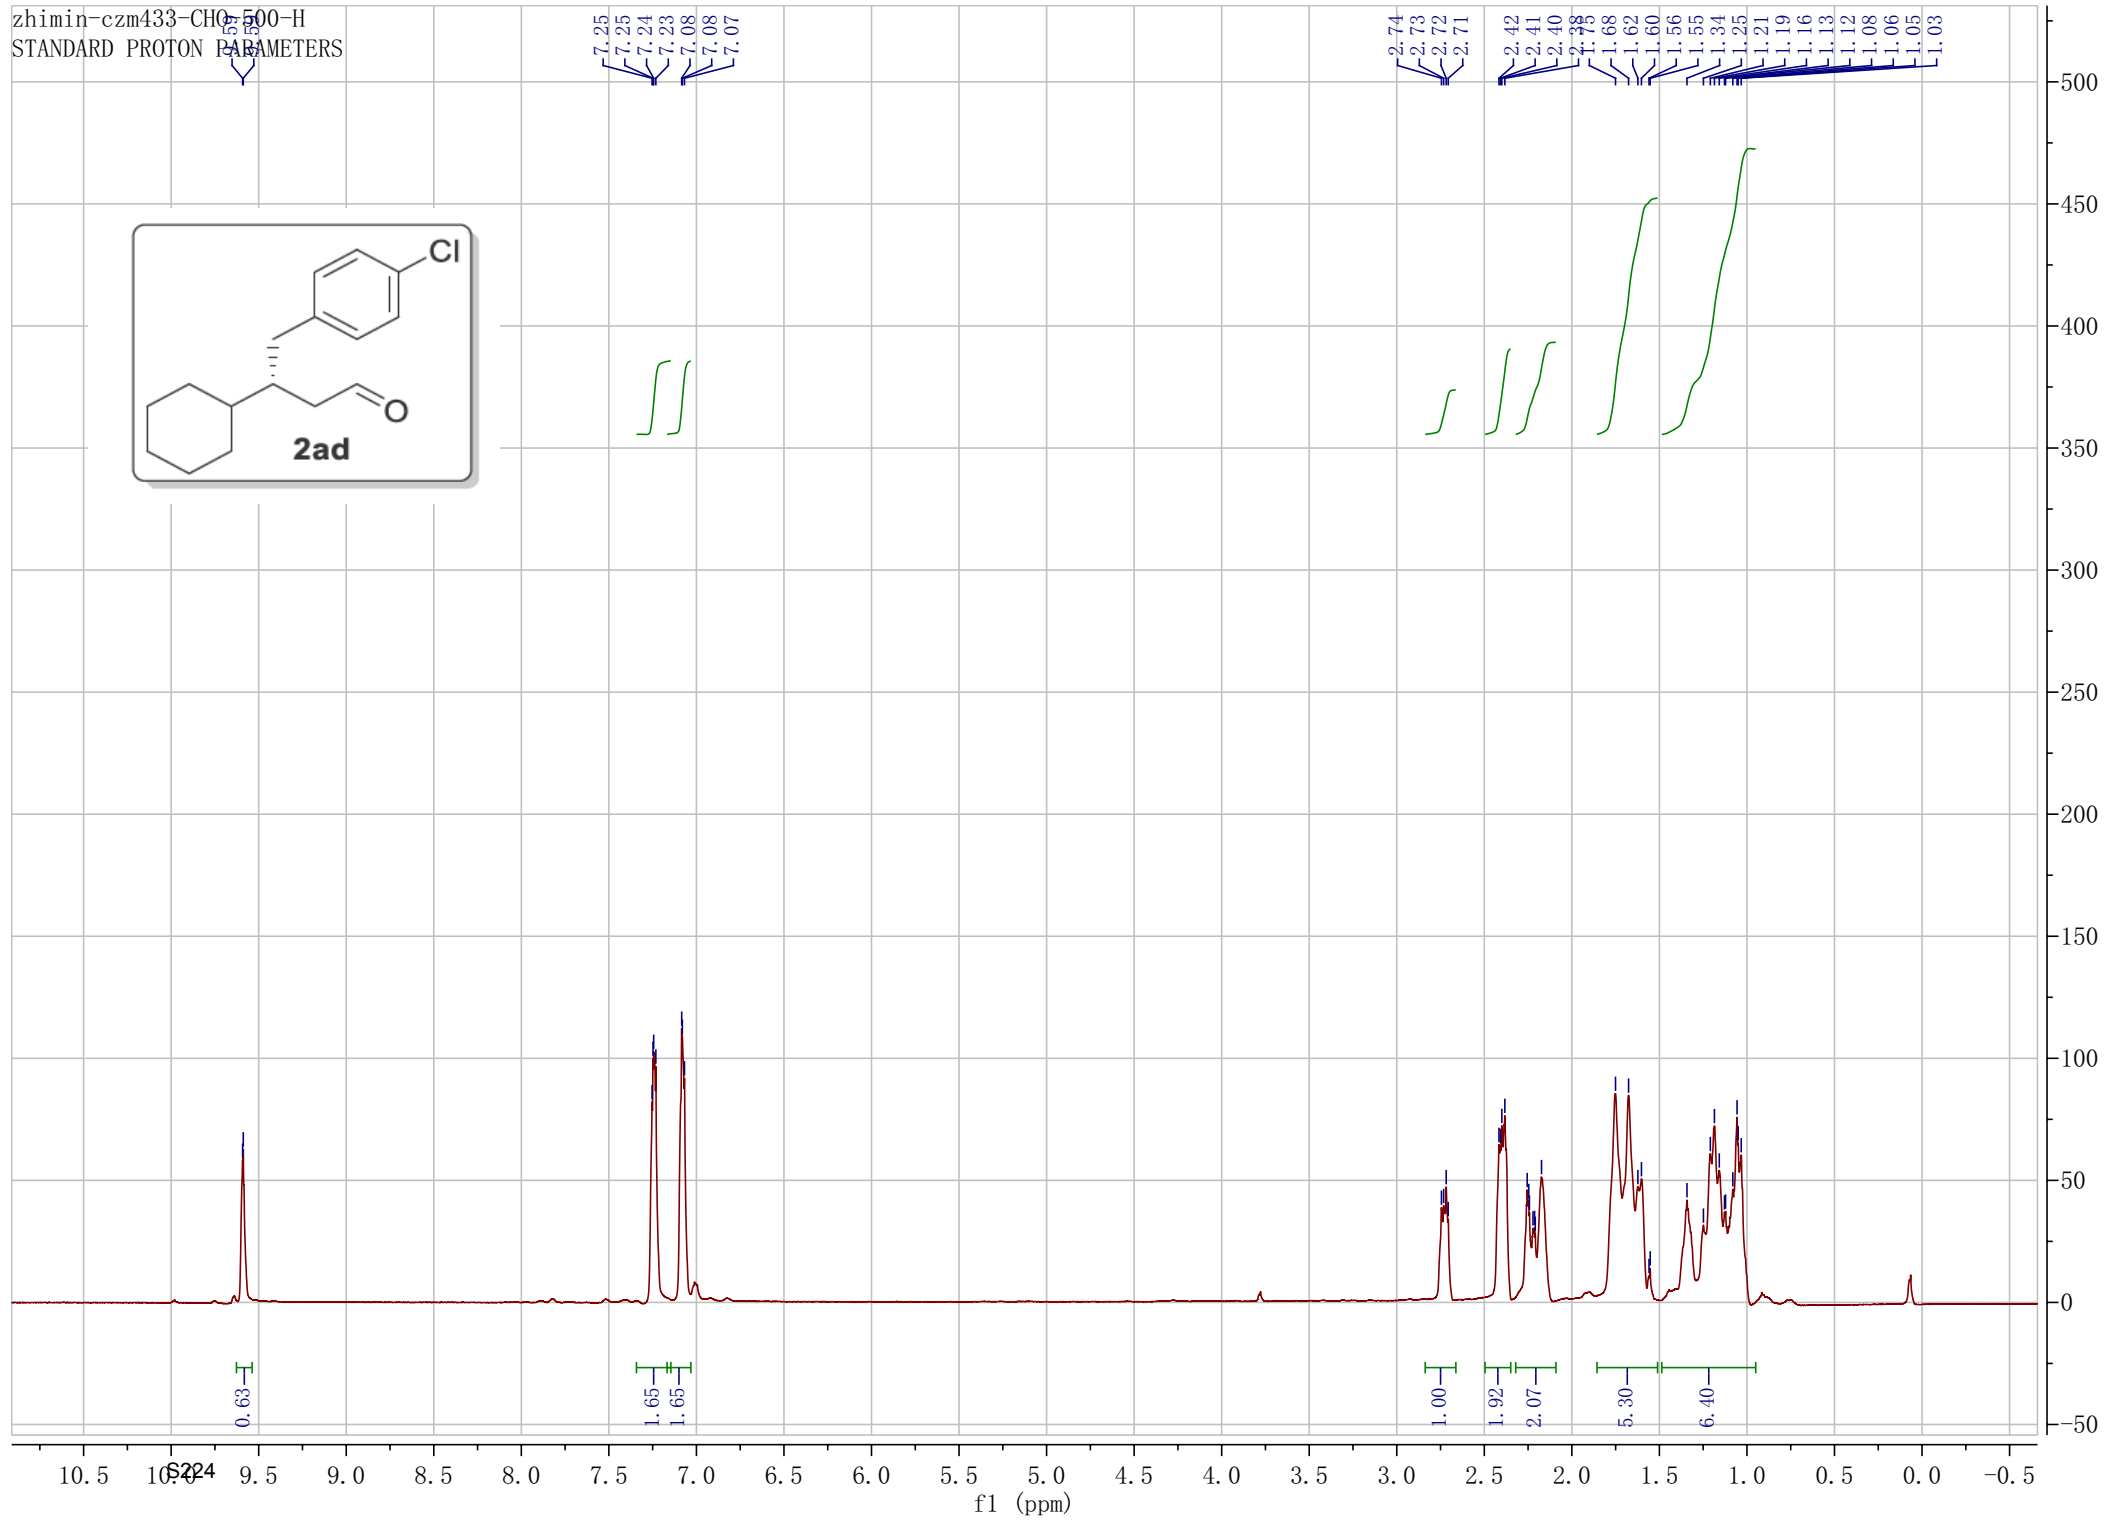

zhimin-czm433-CHO-300-C  
13C OBSERVE

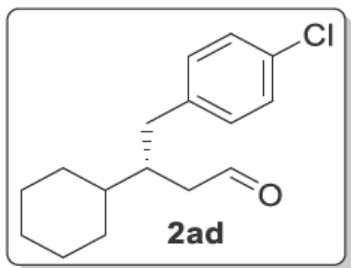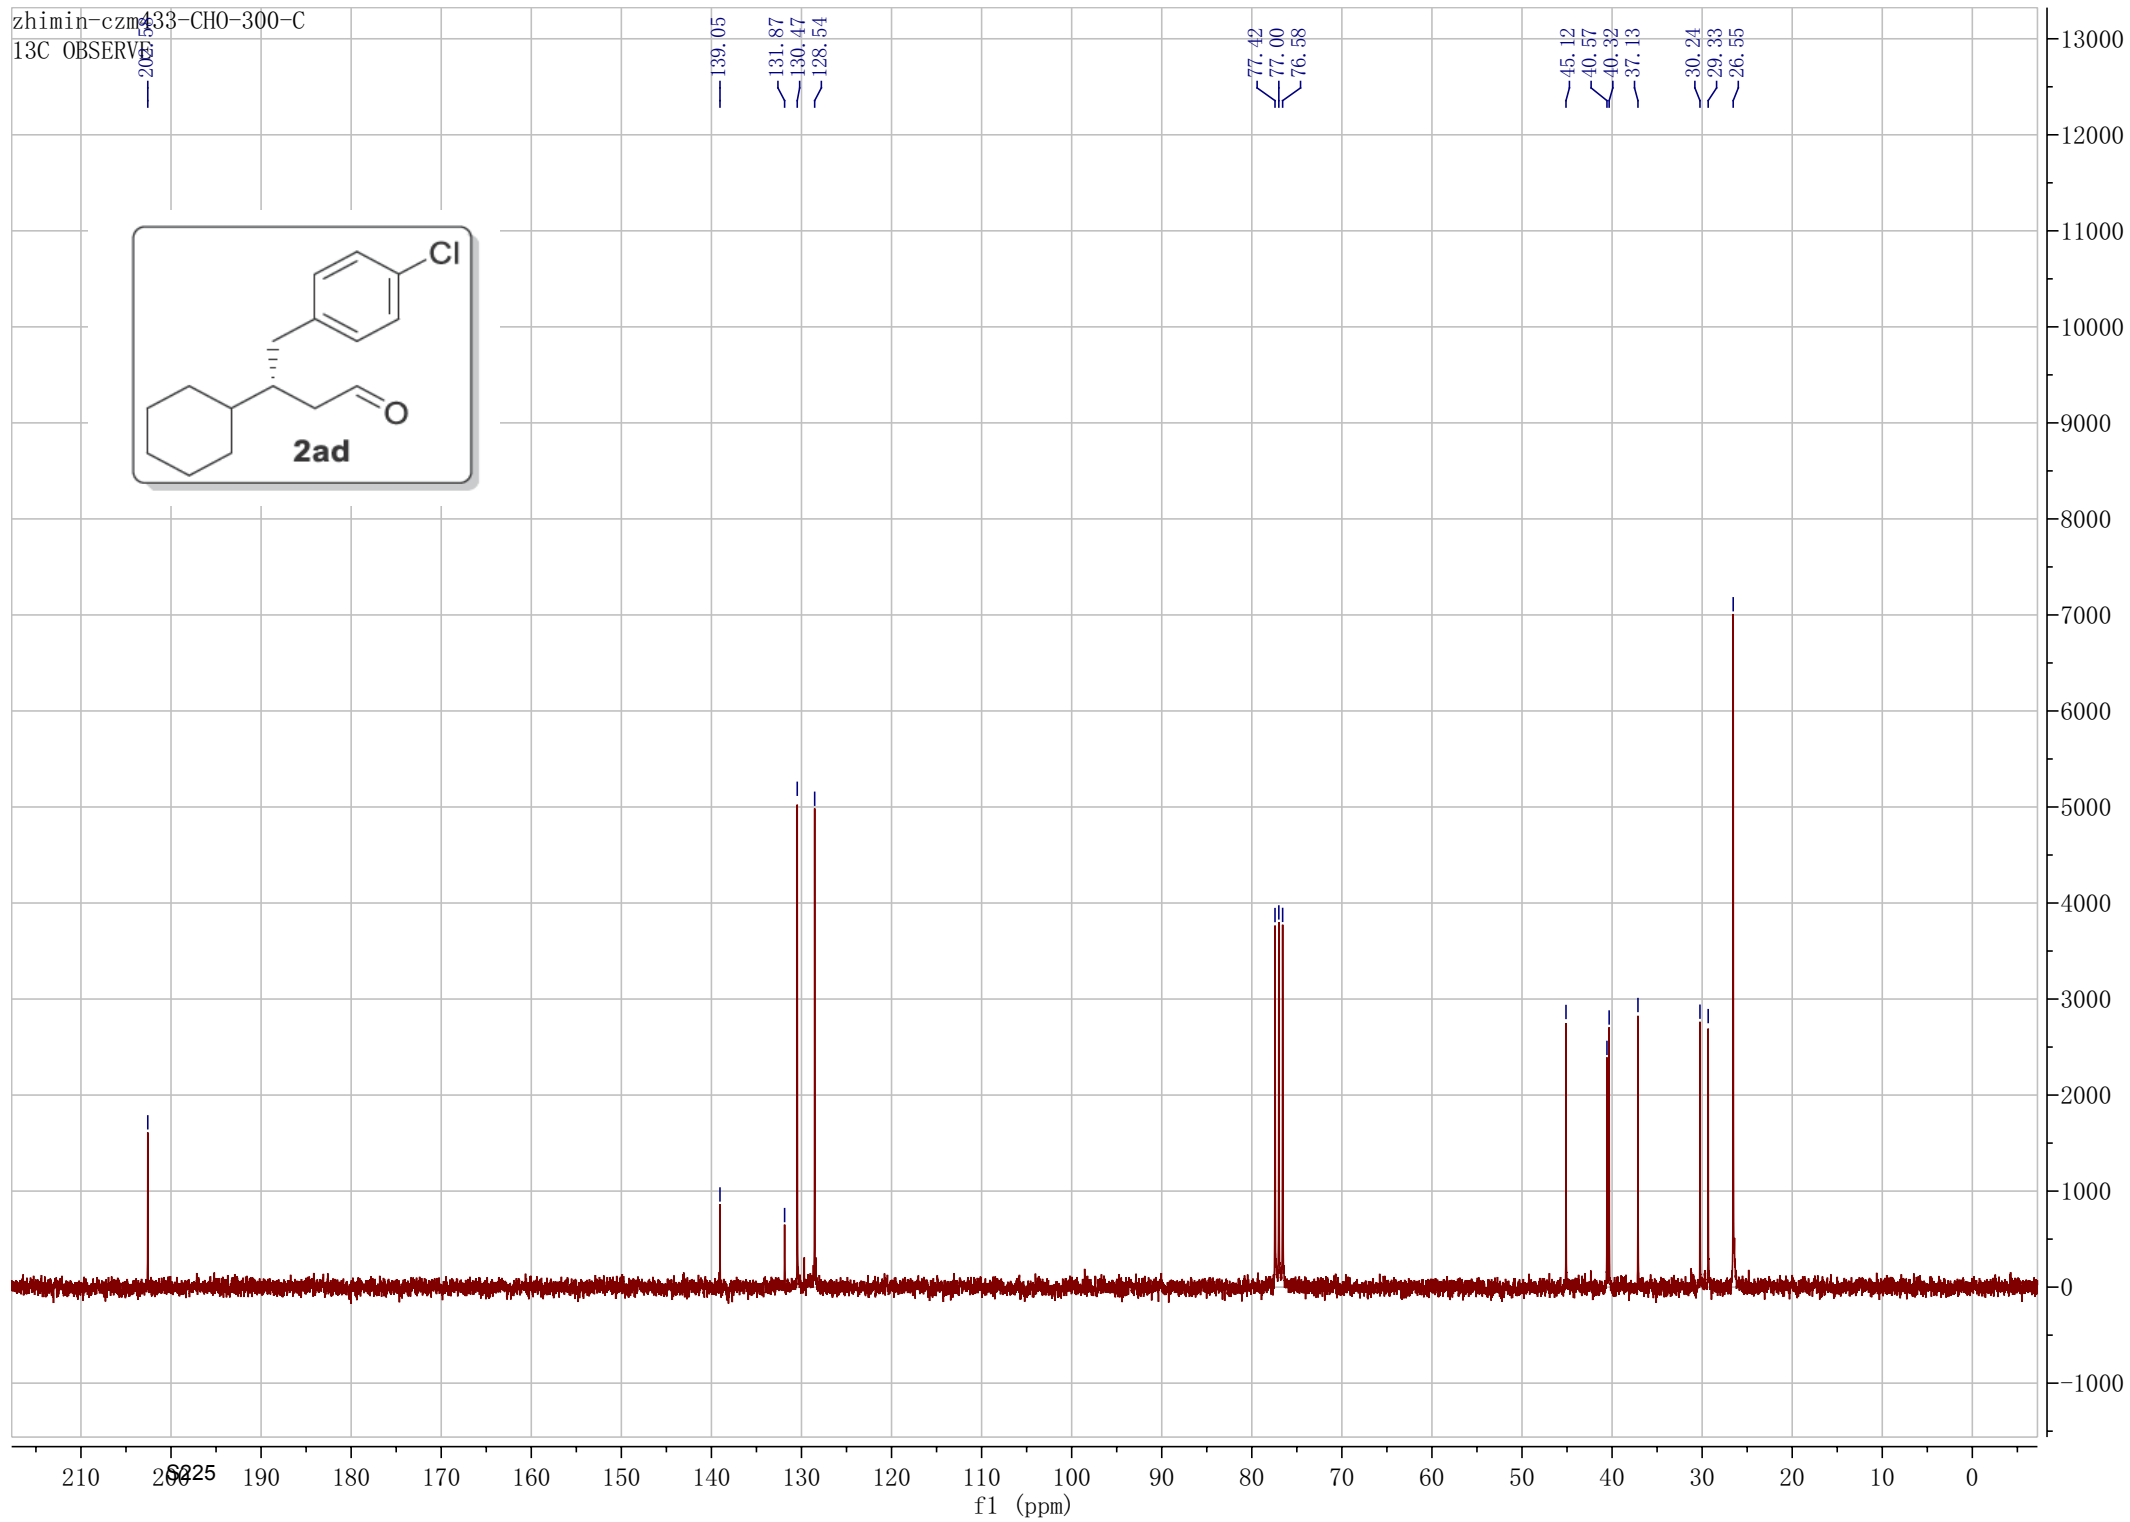

zhimin-czm427-OH-300-H  
UofUtah Unity300 NMR  
STANDARD 1H OBSERVE

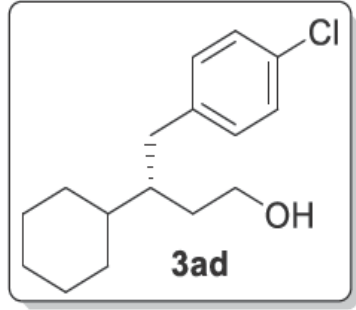

7.26  
7.26  
7.25  
7.22  
7.09  
7.06

3.56  
3.55  
2.69  
2.67  
2.65  
2.63  
2.42  
2.39  
2.37  
2.35  
1.74  
1.72  
1.66  
1.64  
1.62  
1.60  
1.58  
1.53  
1.45  
1.43  
1.41  
1.39  
1.36  
1.33  
1.29  
1.23  
1.17  
1.14  
1.11  
1.07

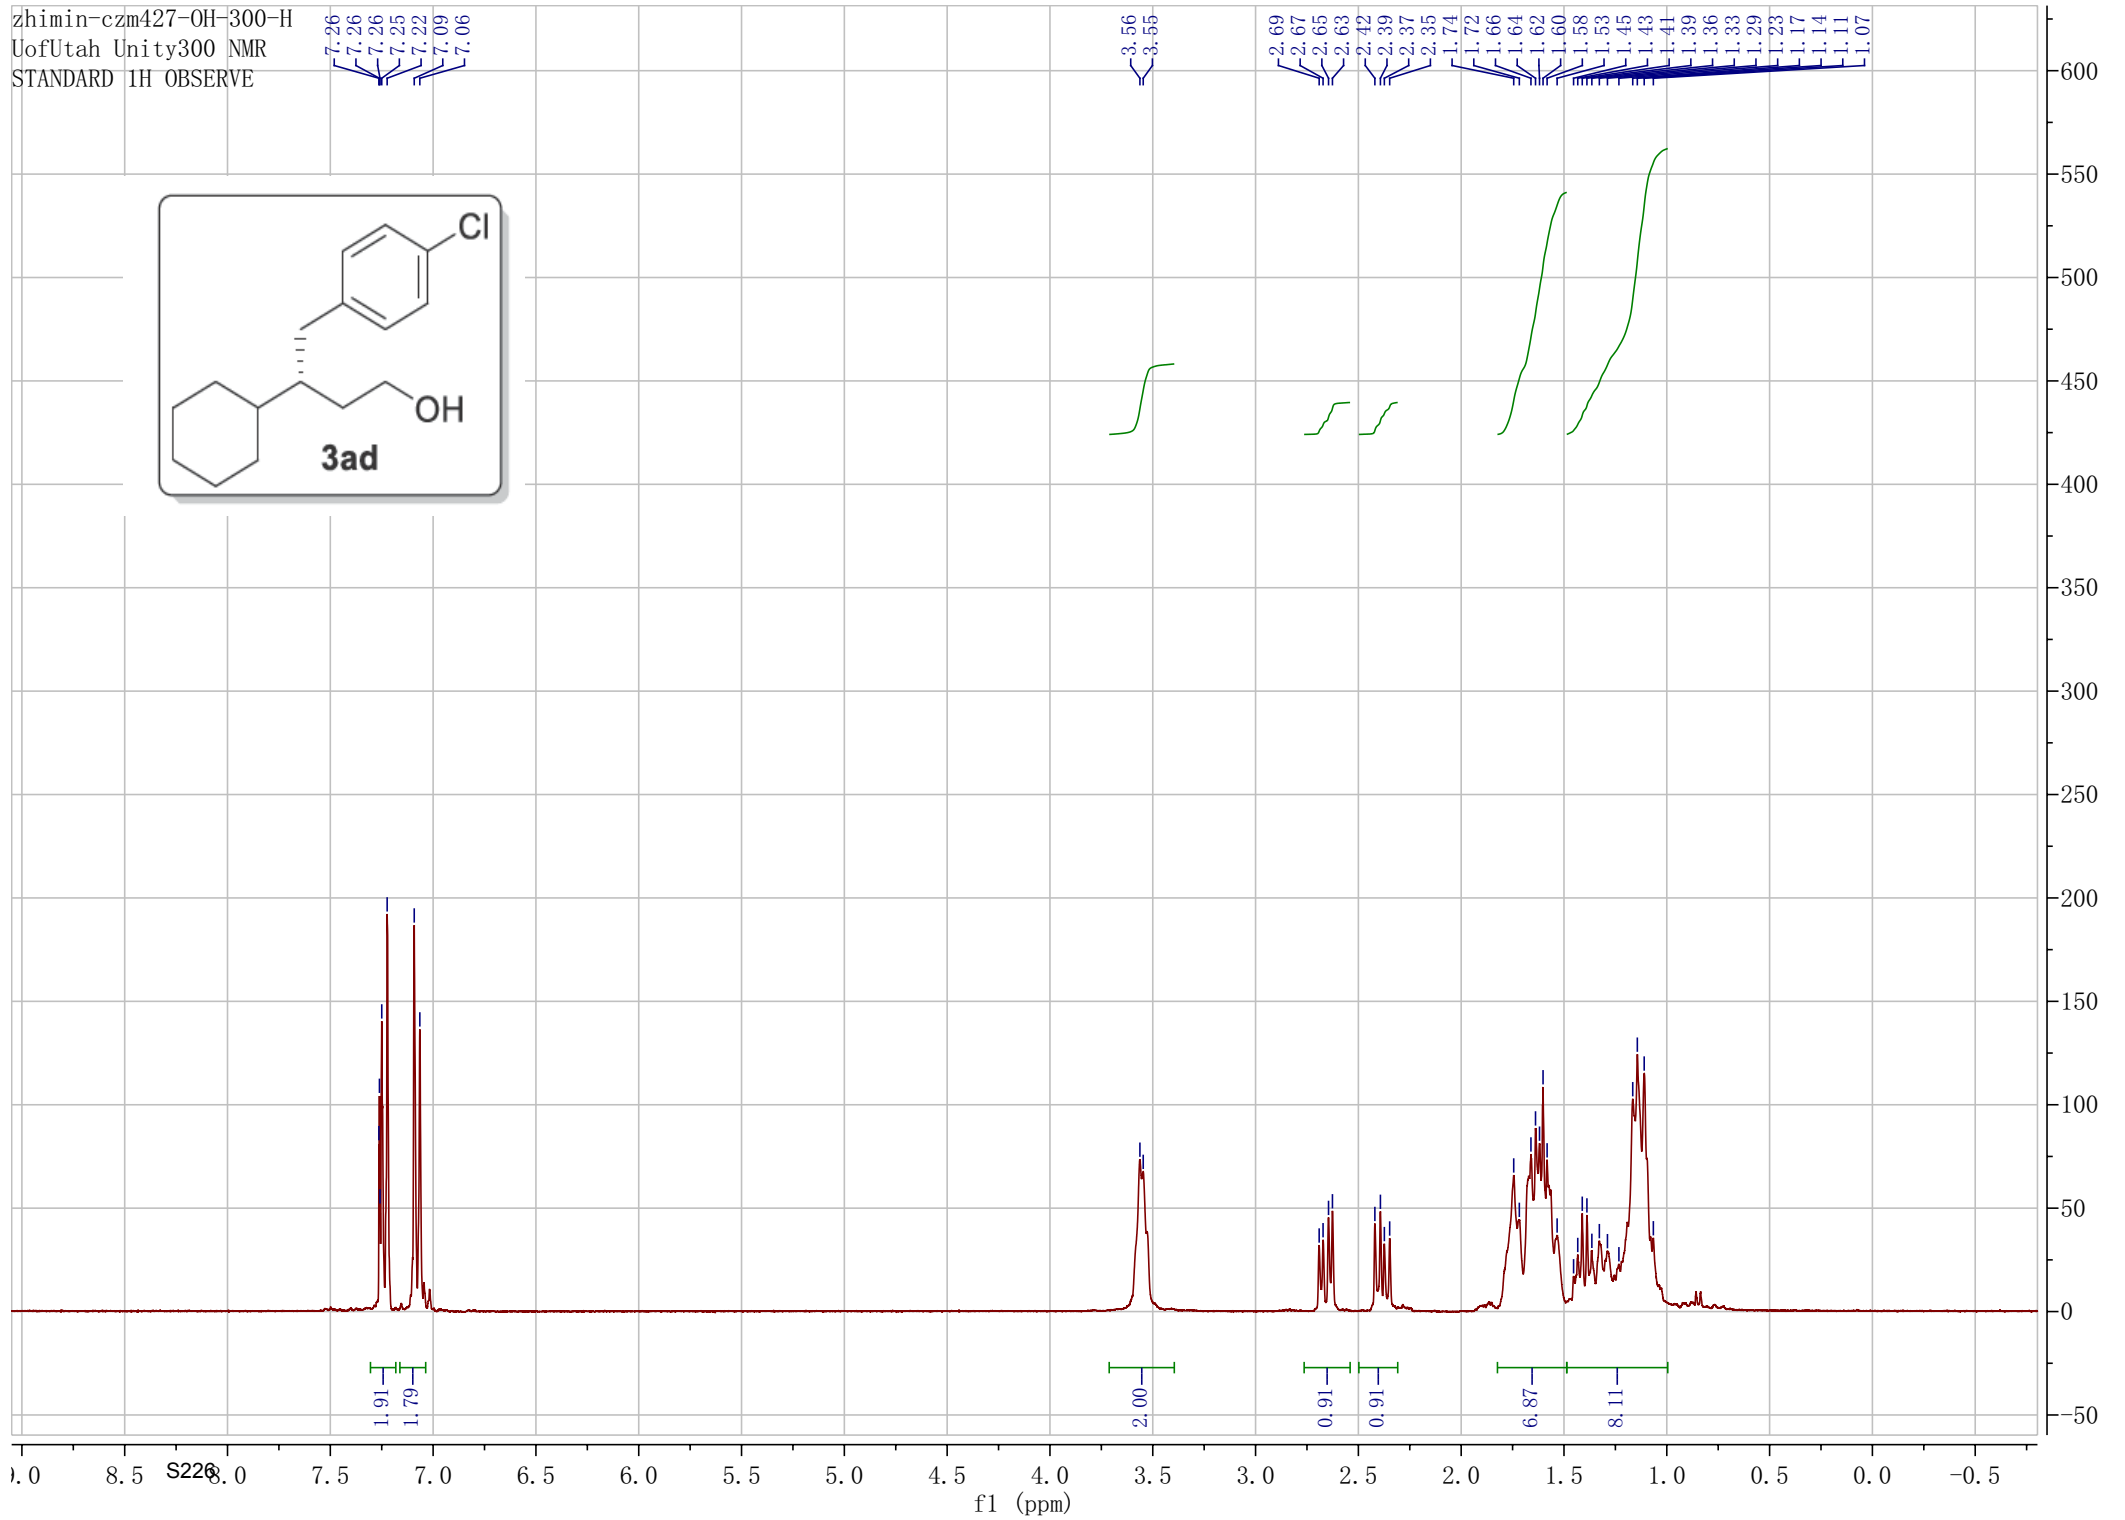



zhimin-czm427-OH-300-C  
13C OBSERVE

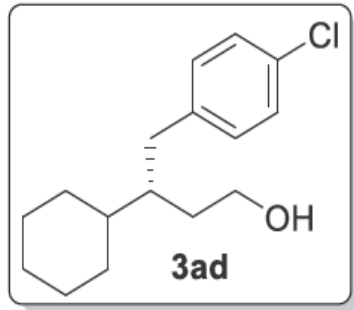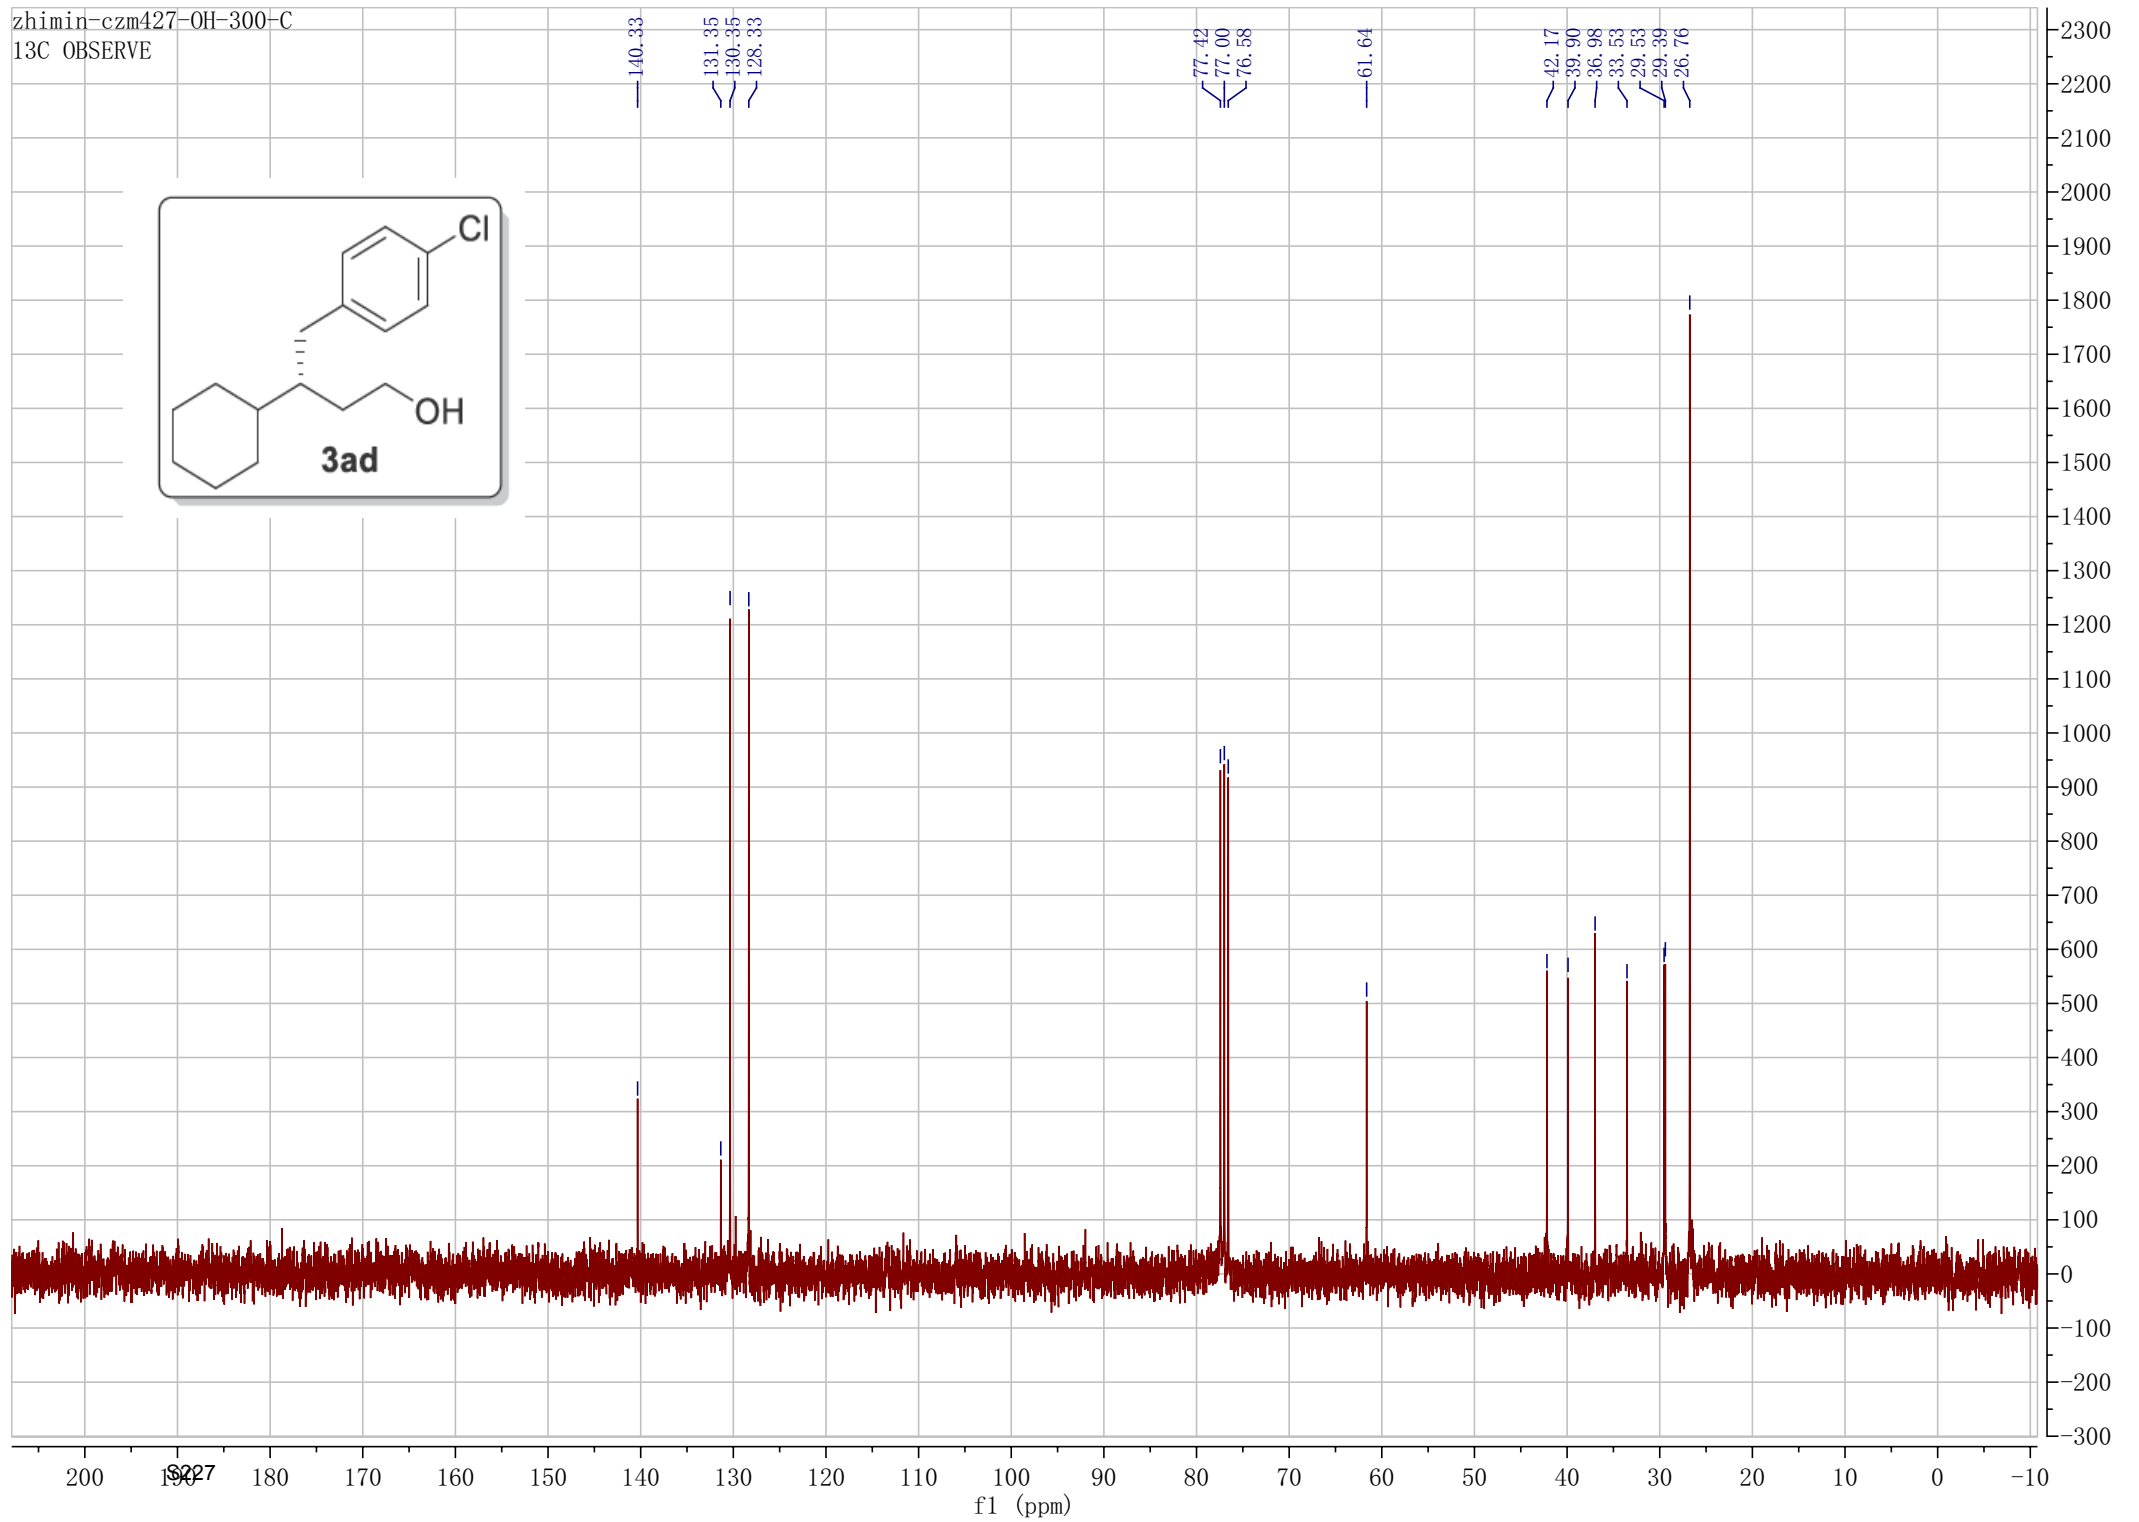

zhimin-czm421-CHO-300-H  
UofUtah Unity 300 NMR  
STANDARD 1H OBSERVE

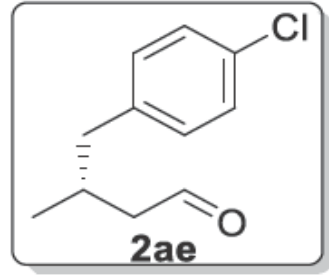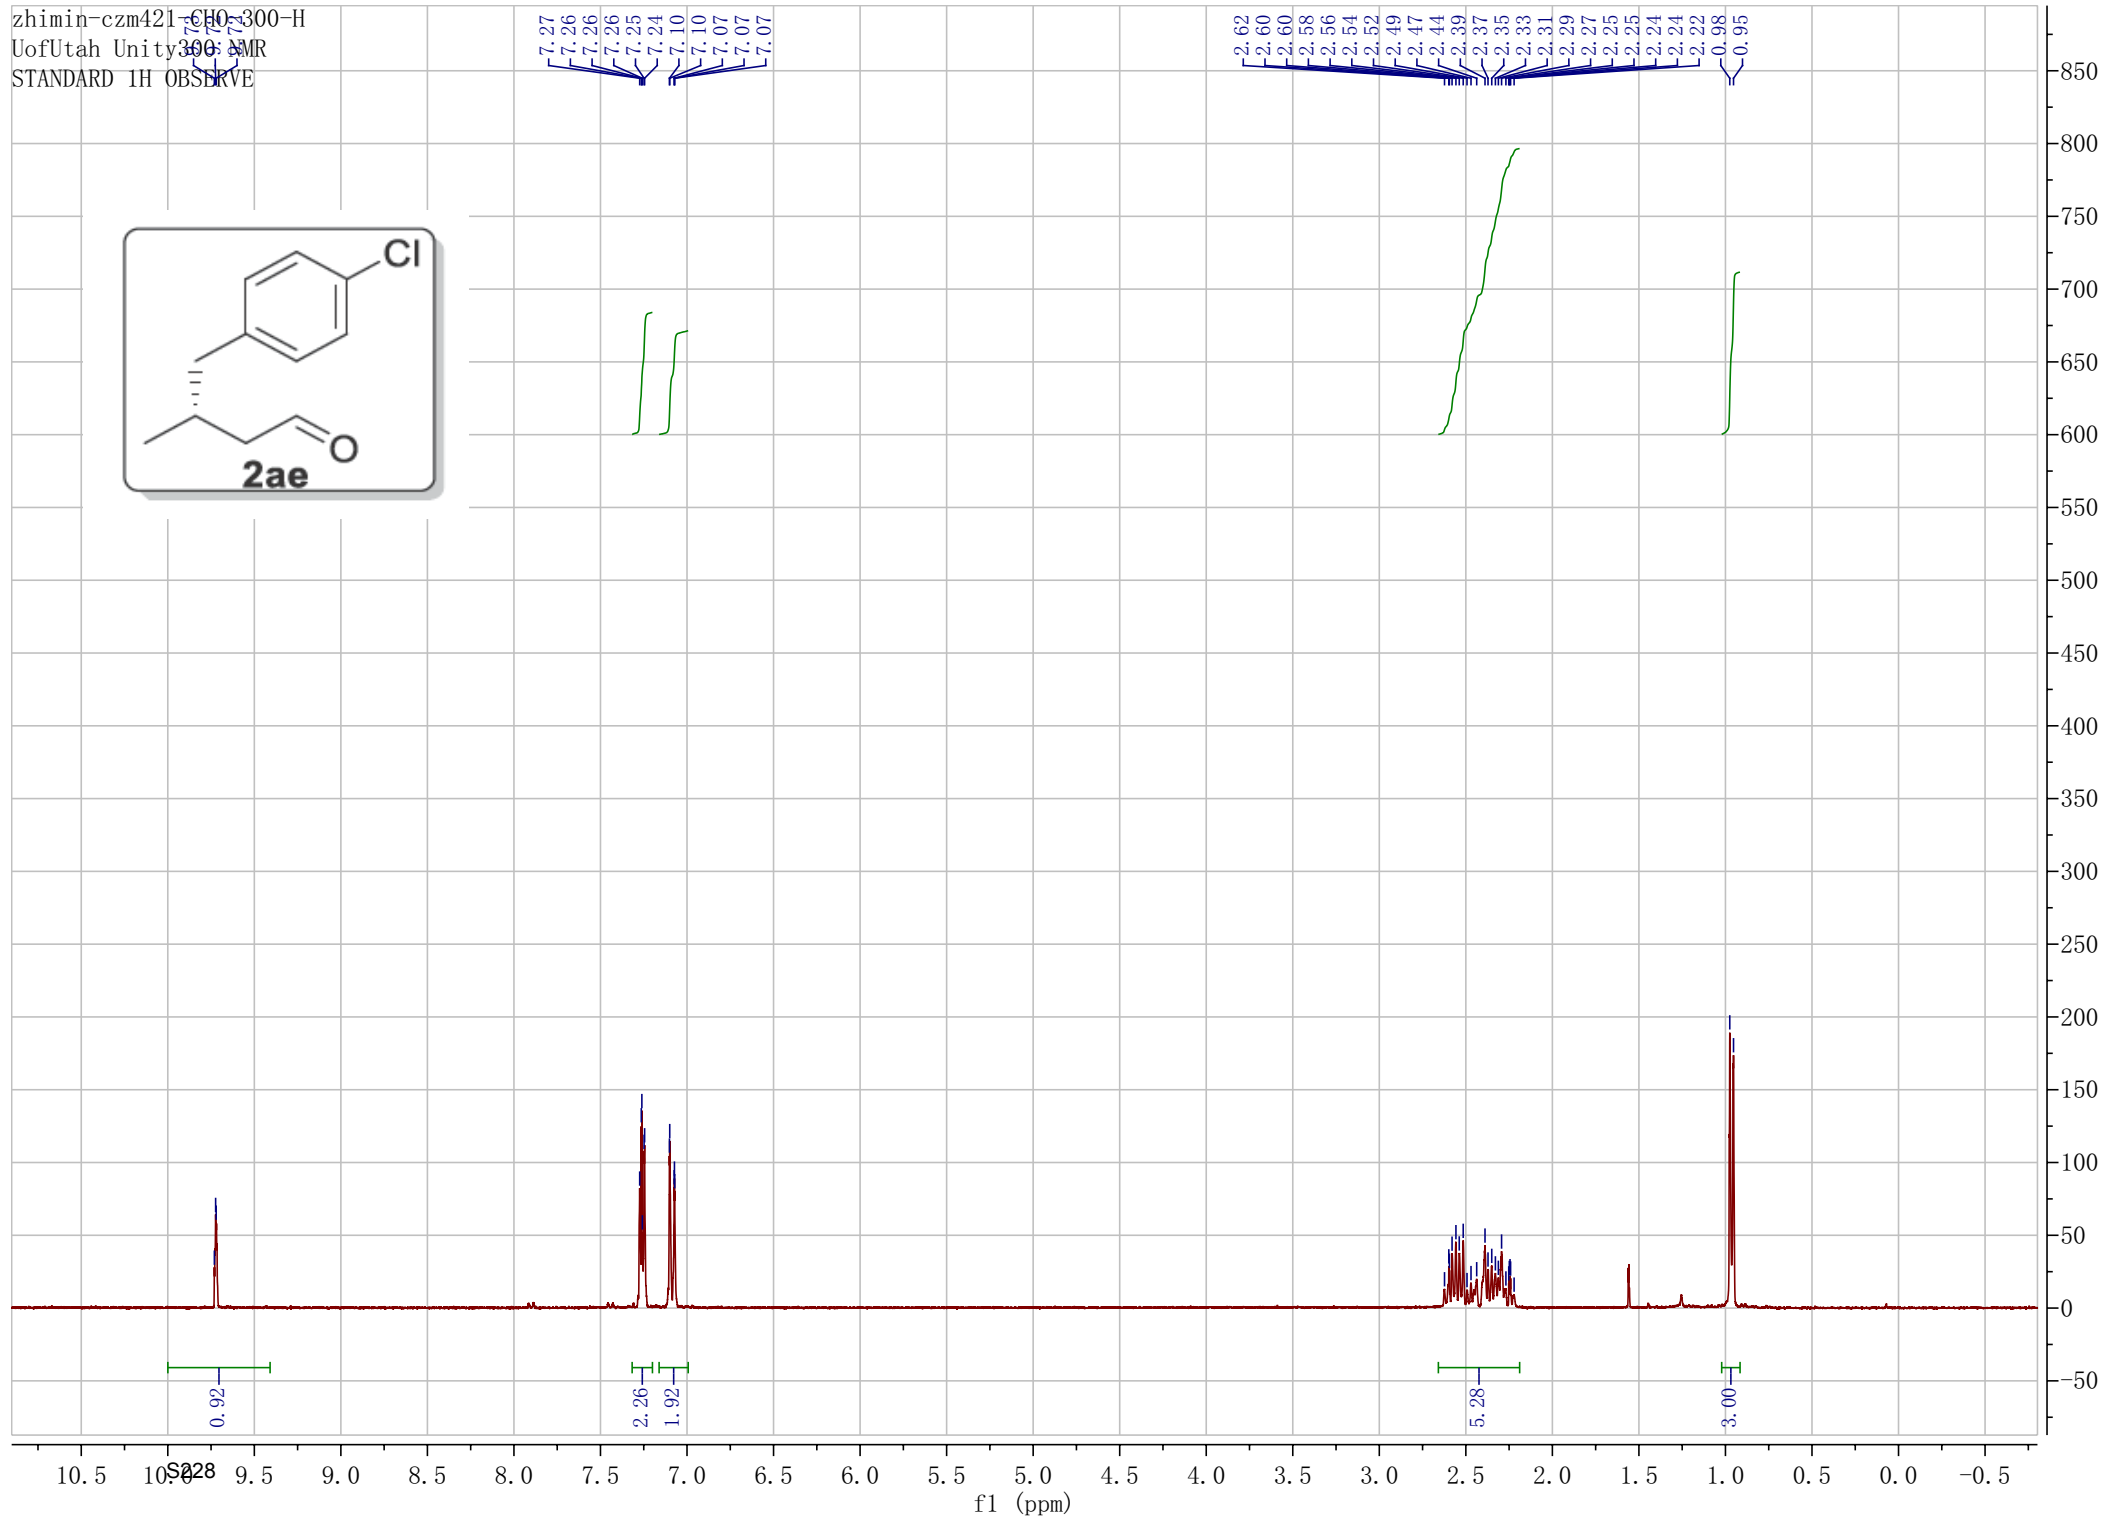

zhimin-czm378-CHO-300.14  
13C OBSERVE

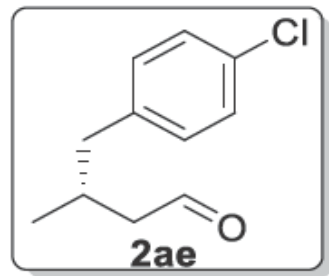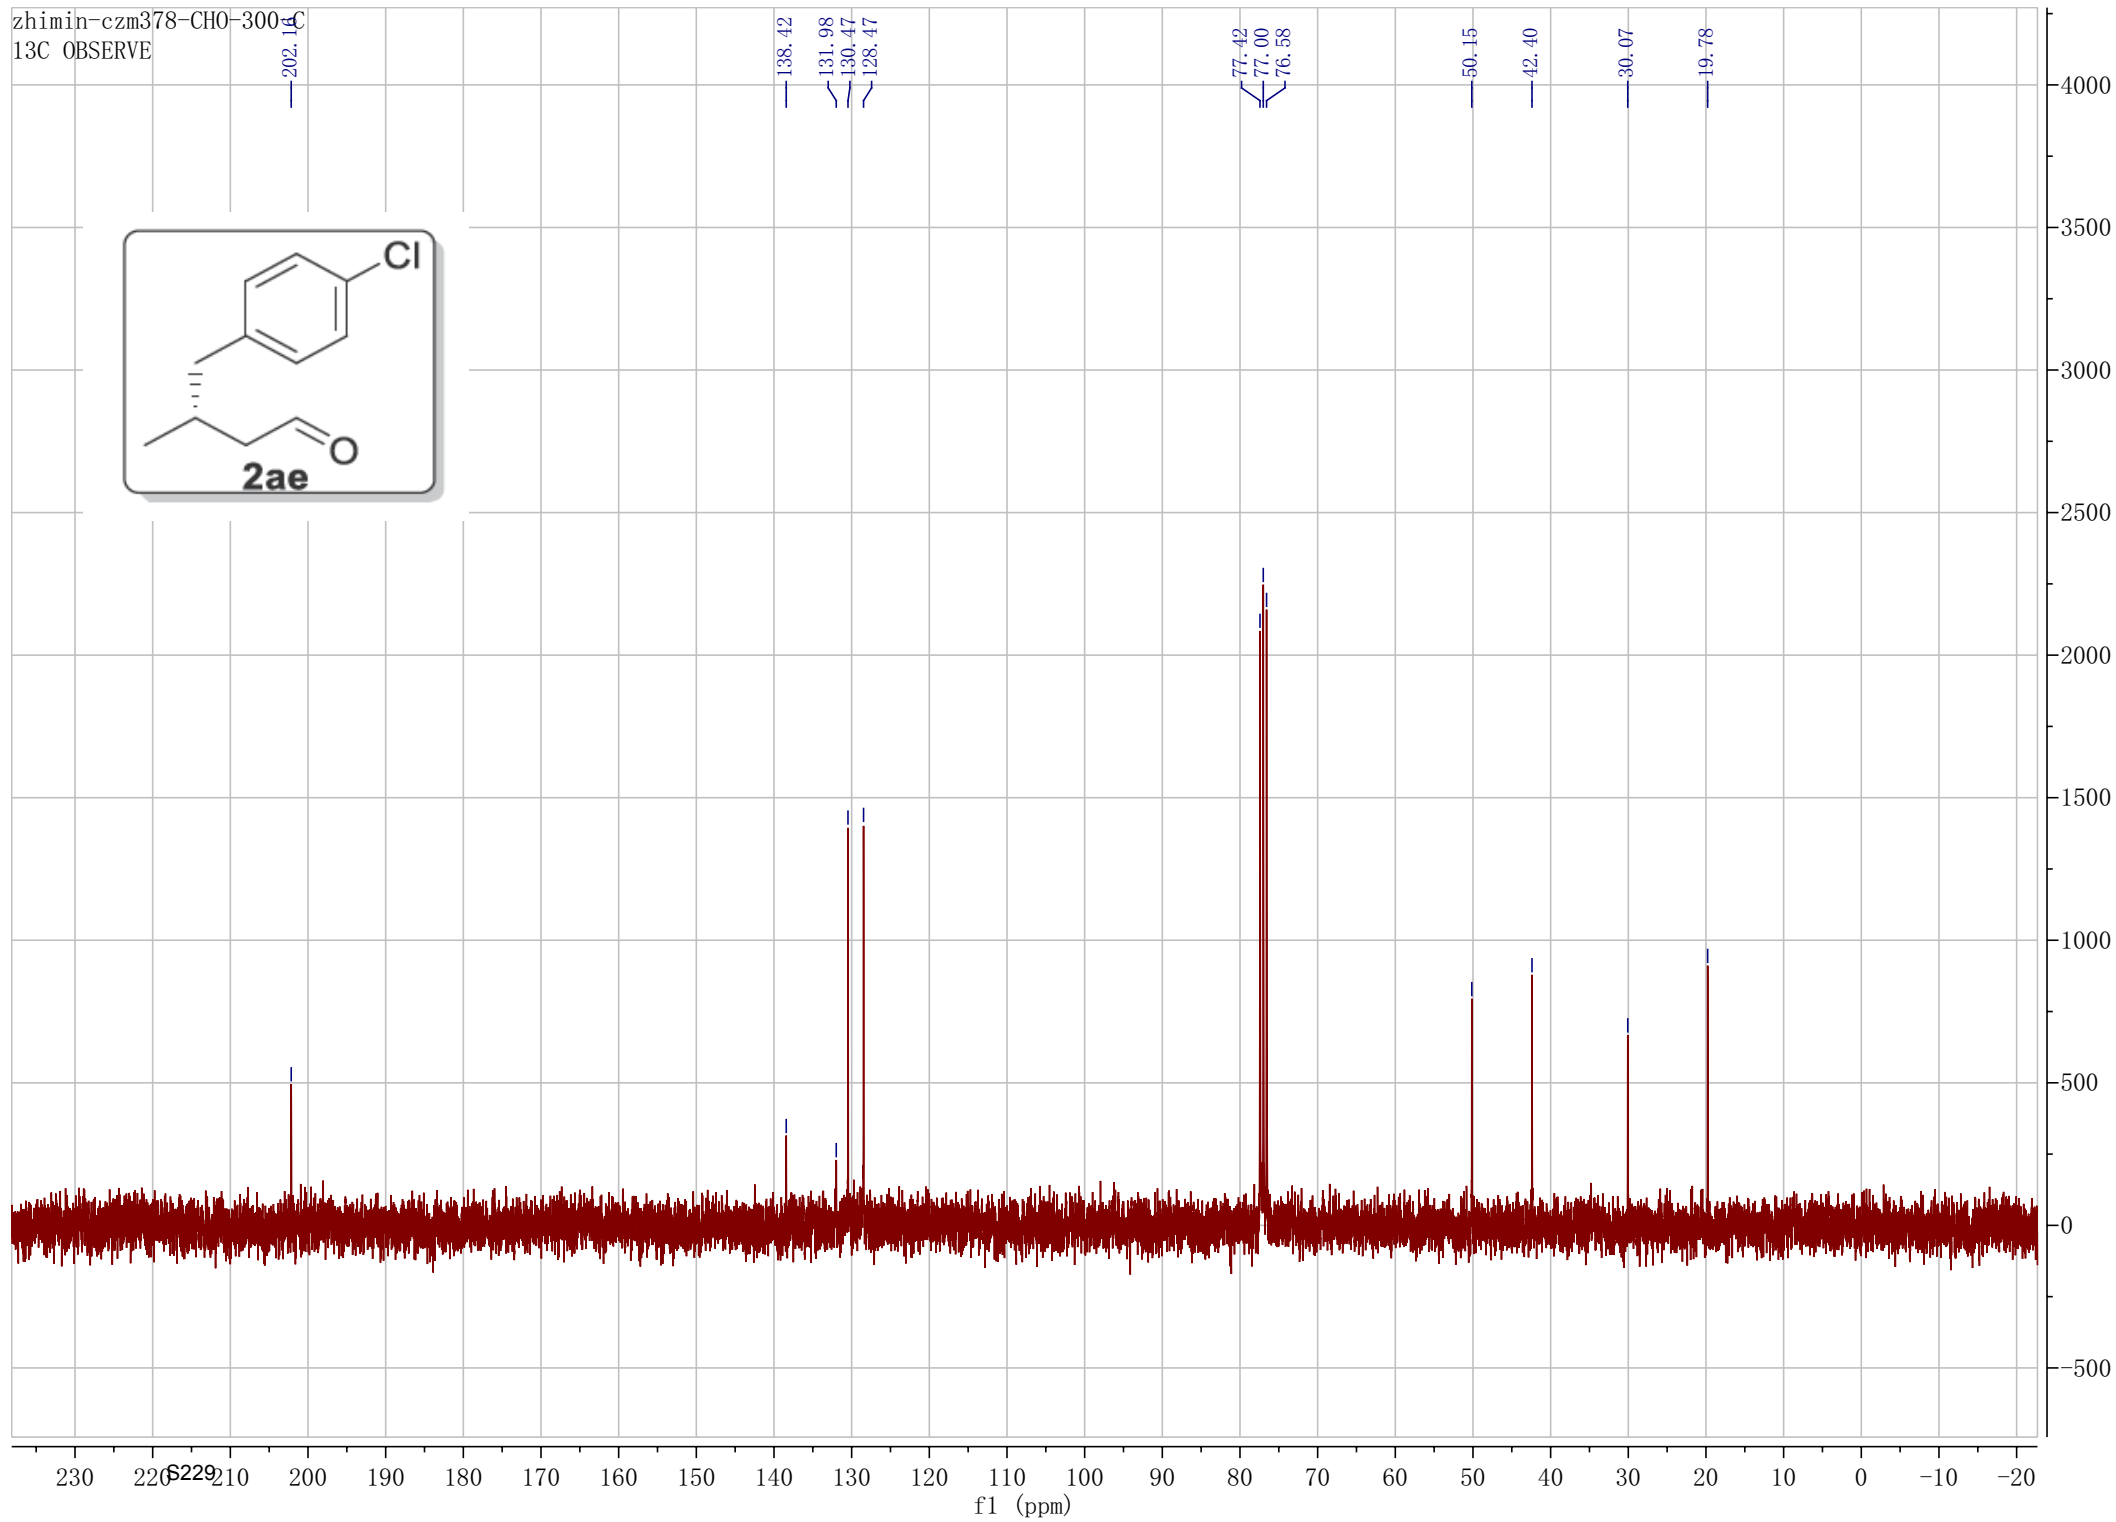

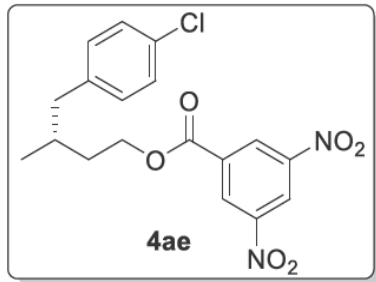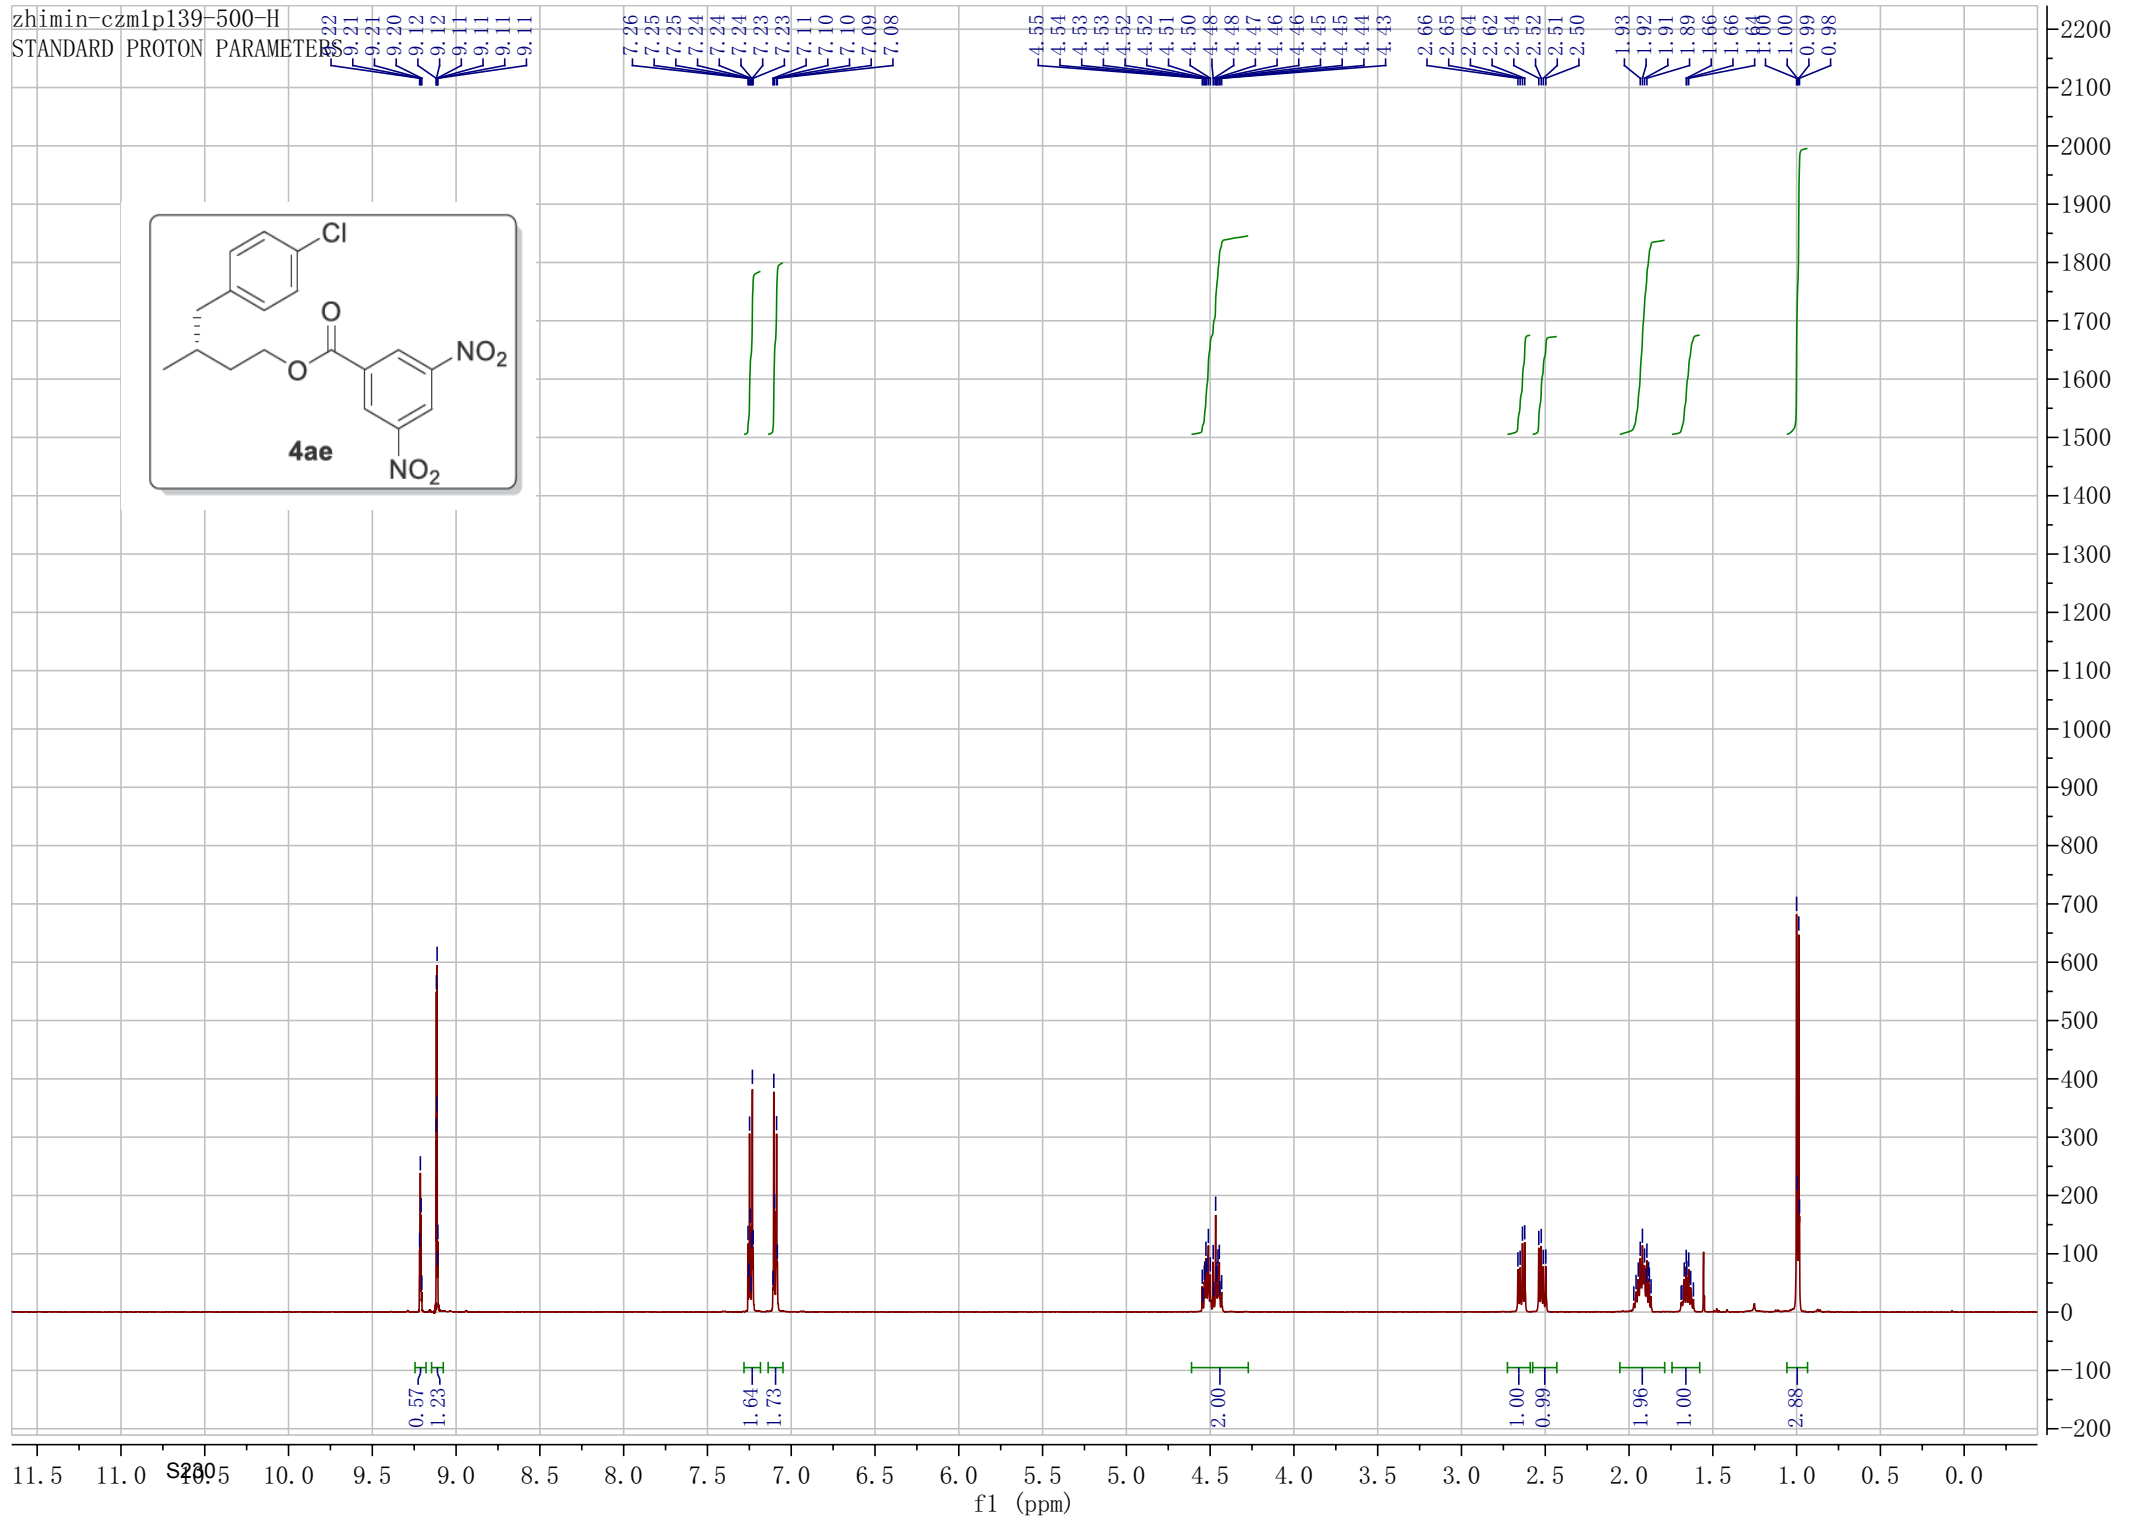

zhimin-czmlp139-300-C  
13C OBSERVE

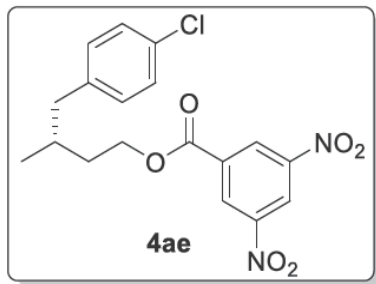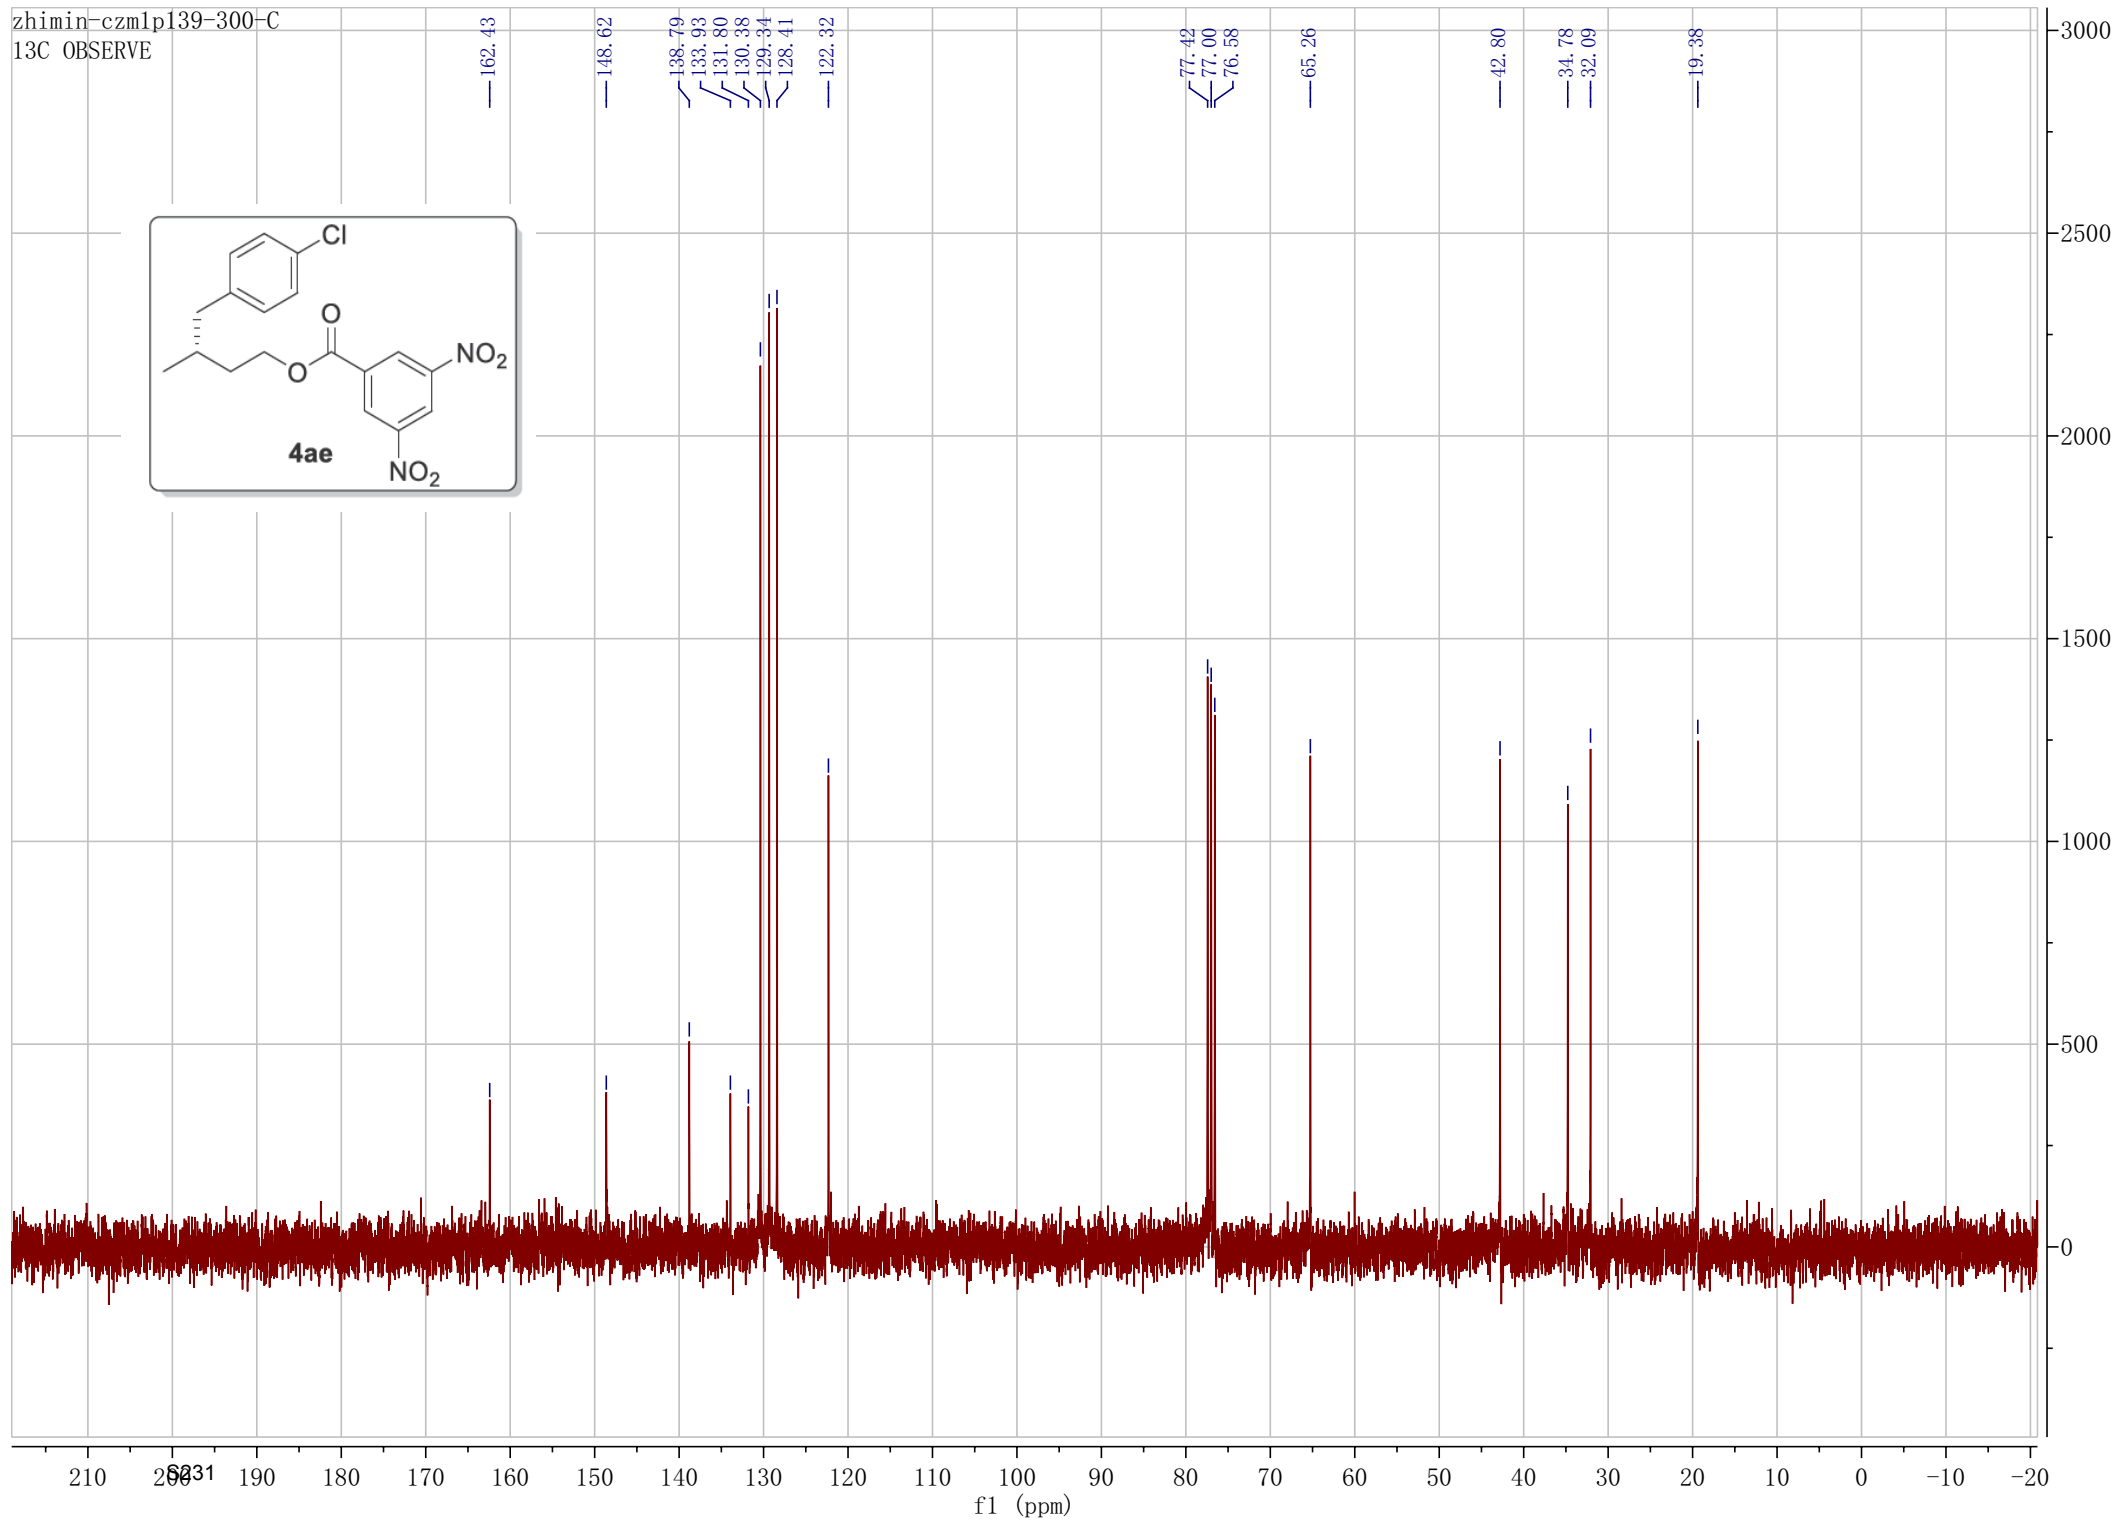

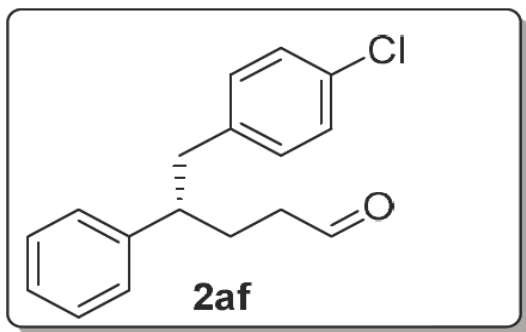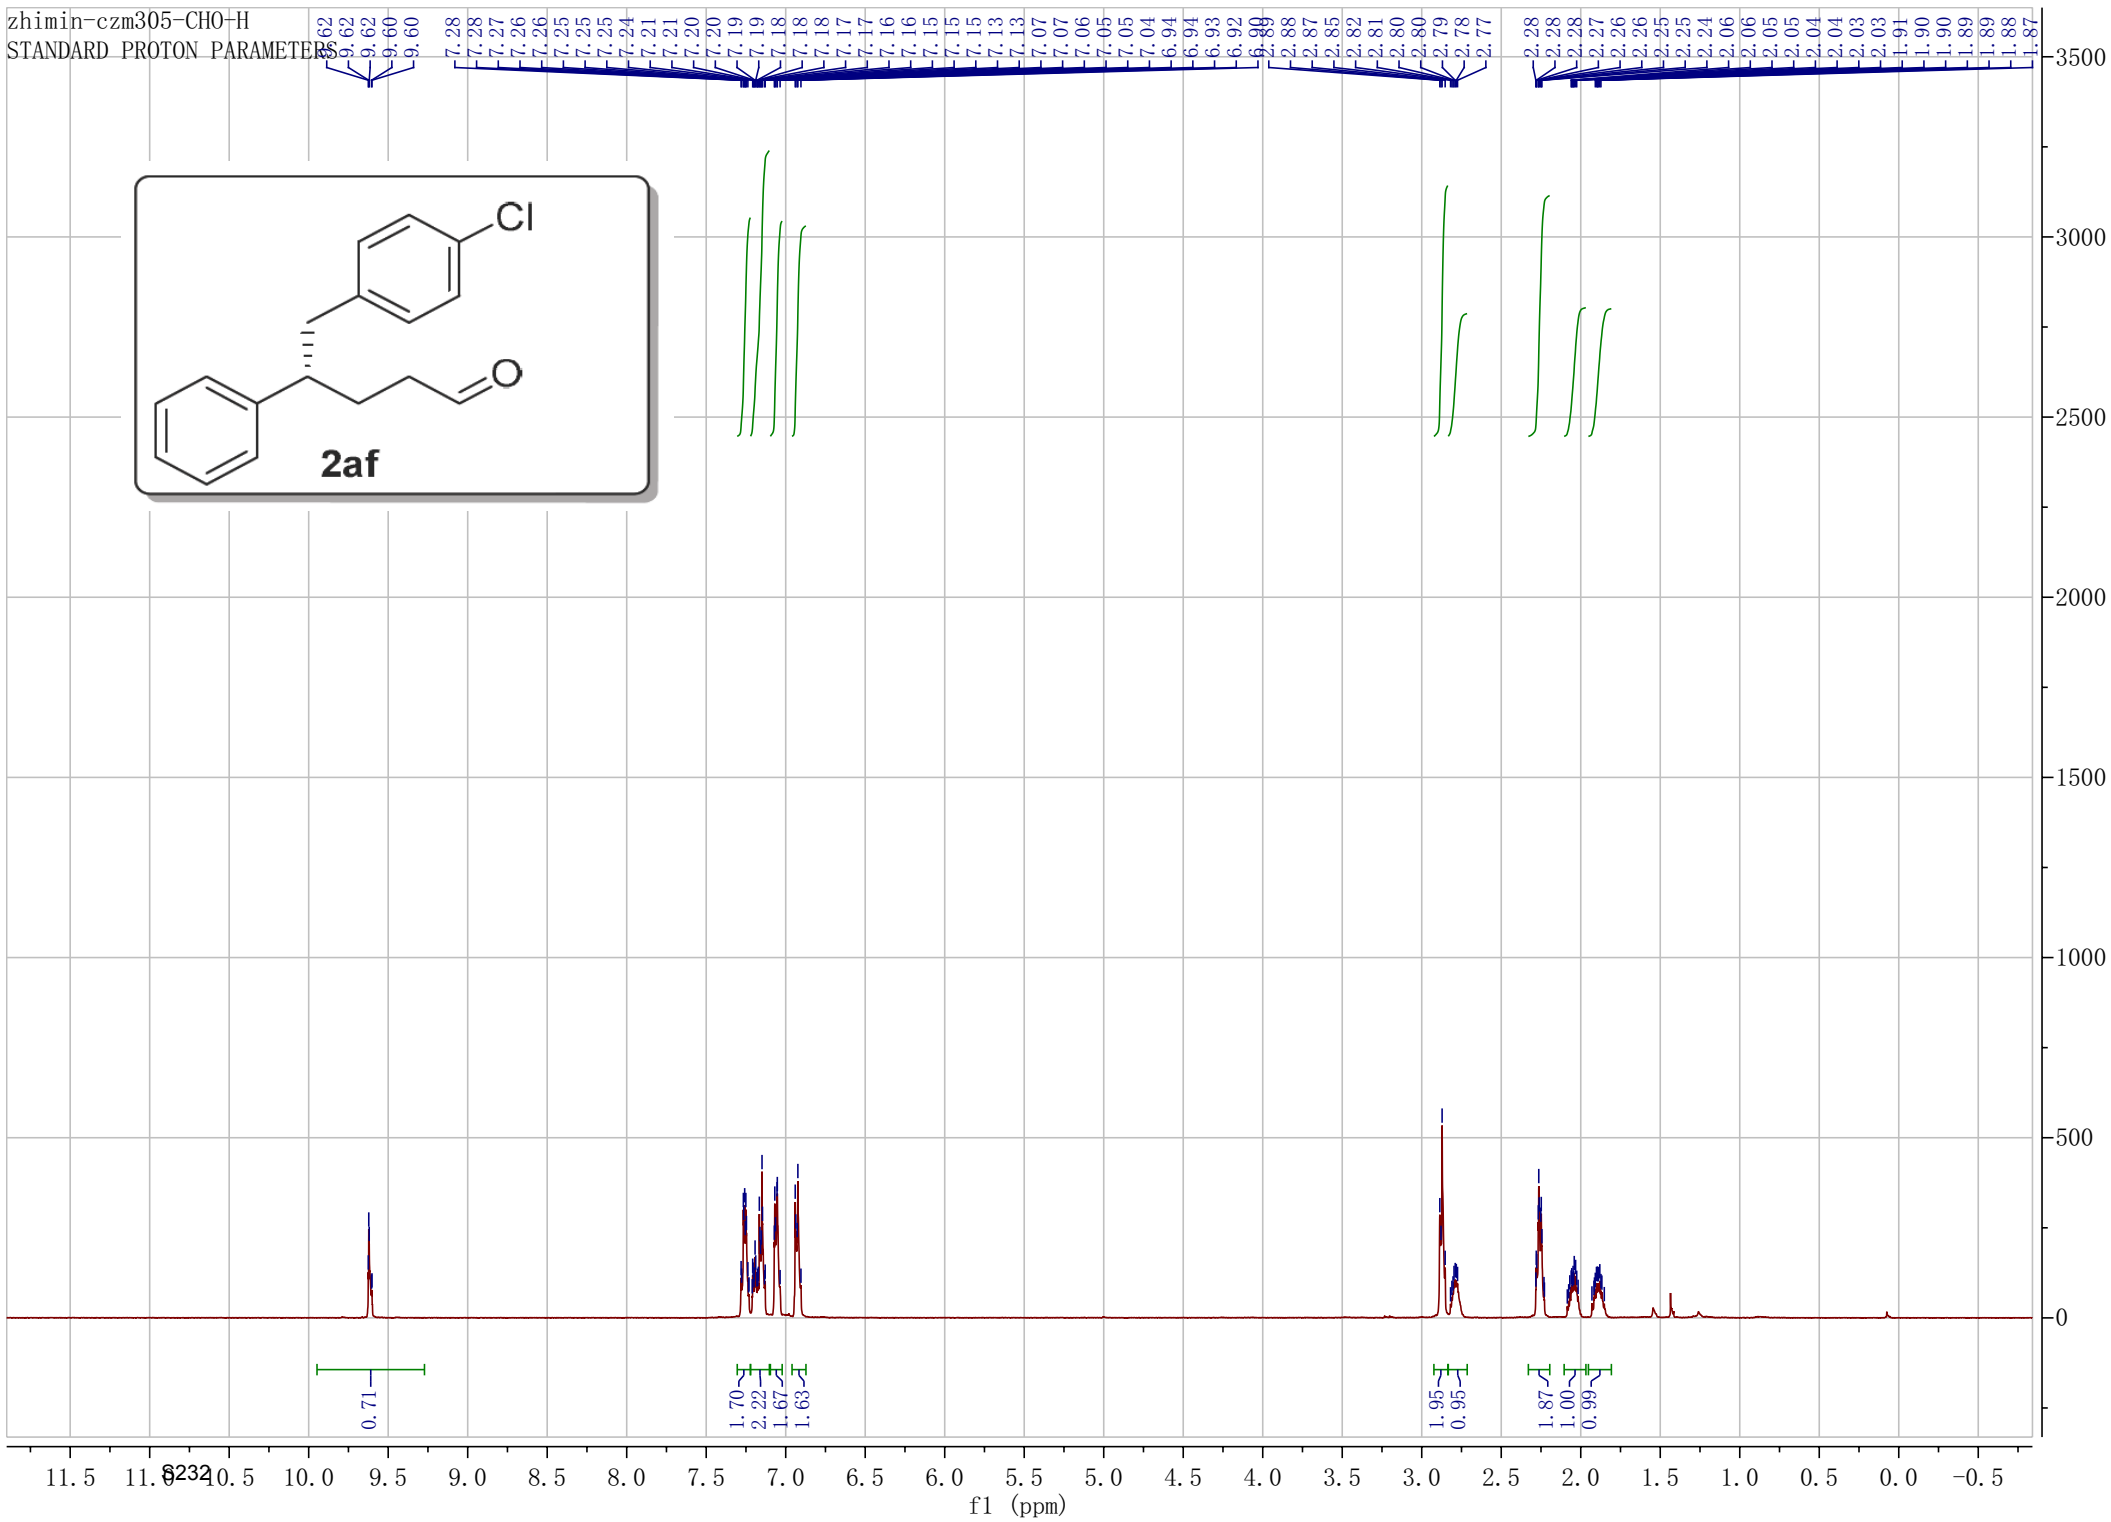

zhimin-201305-CHO-C  
STANDARD: CARBON PARAMETERS

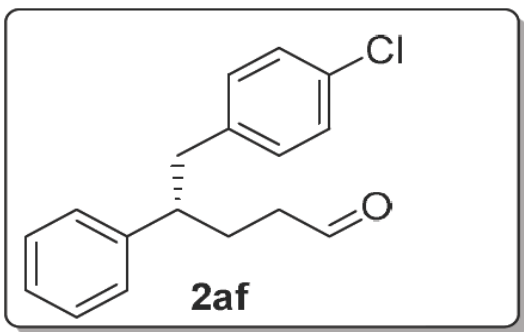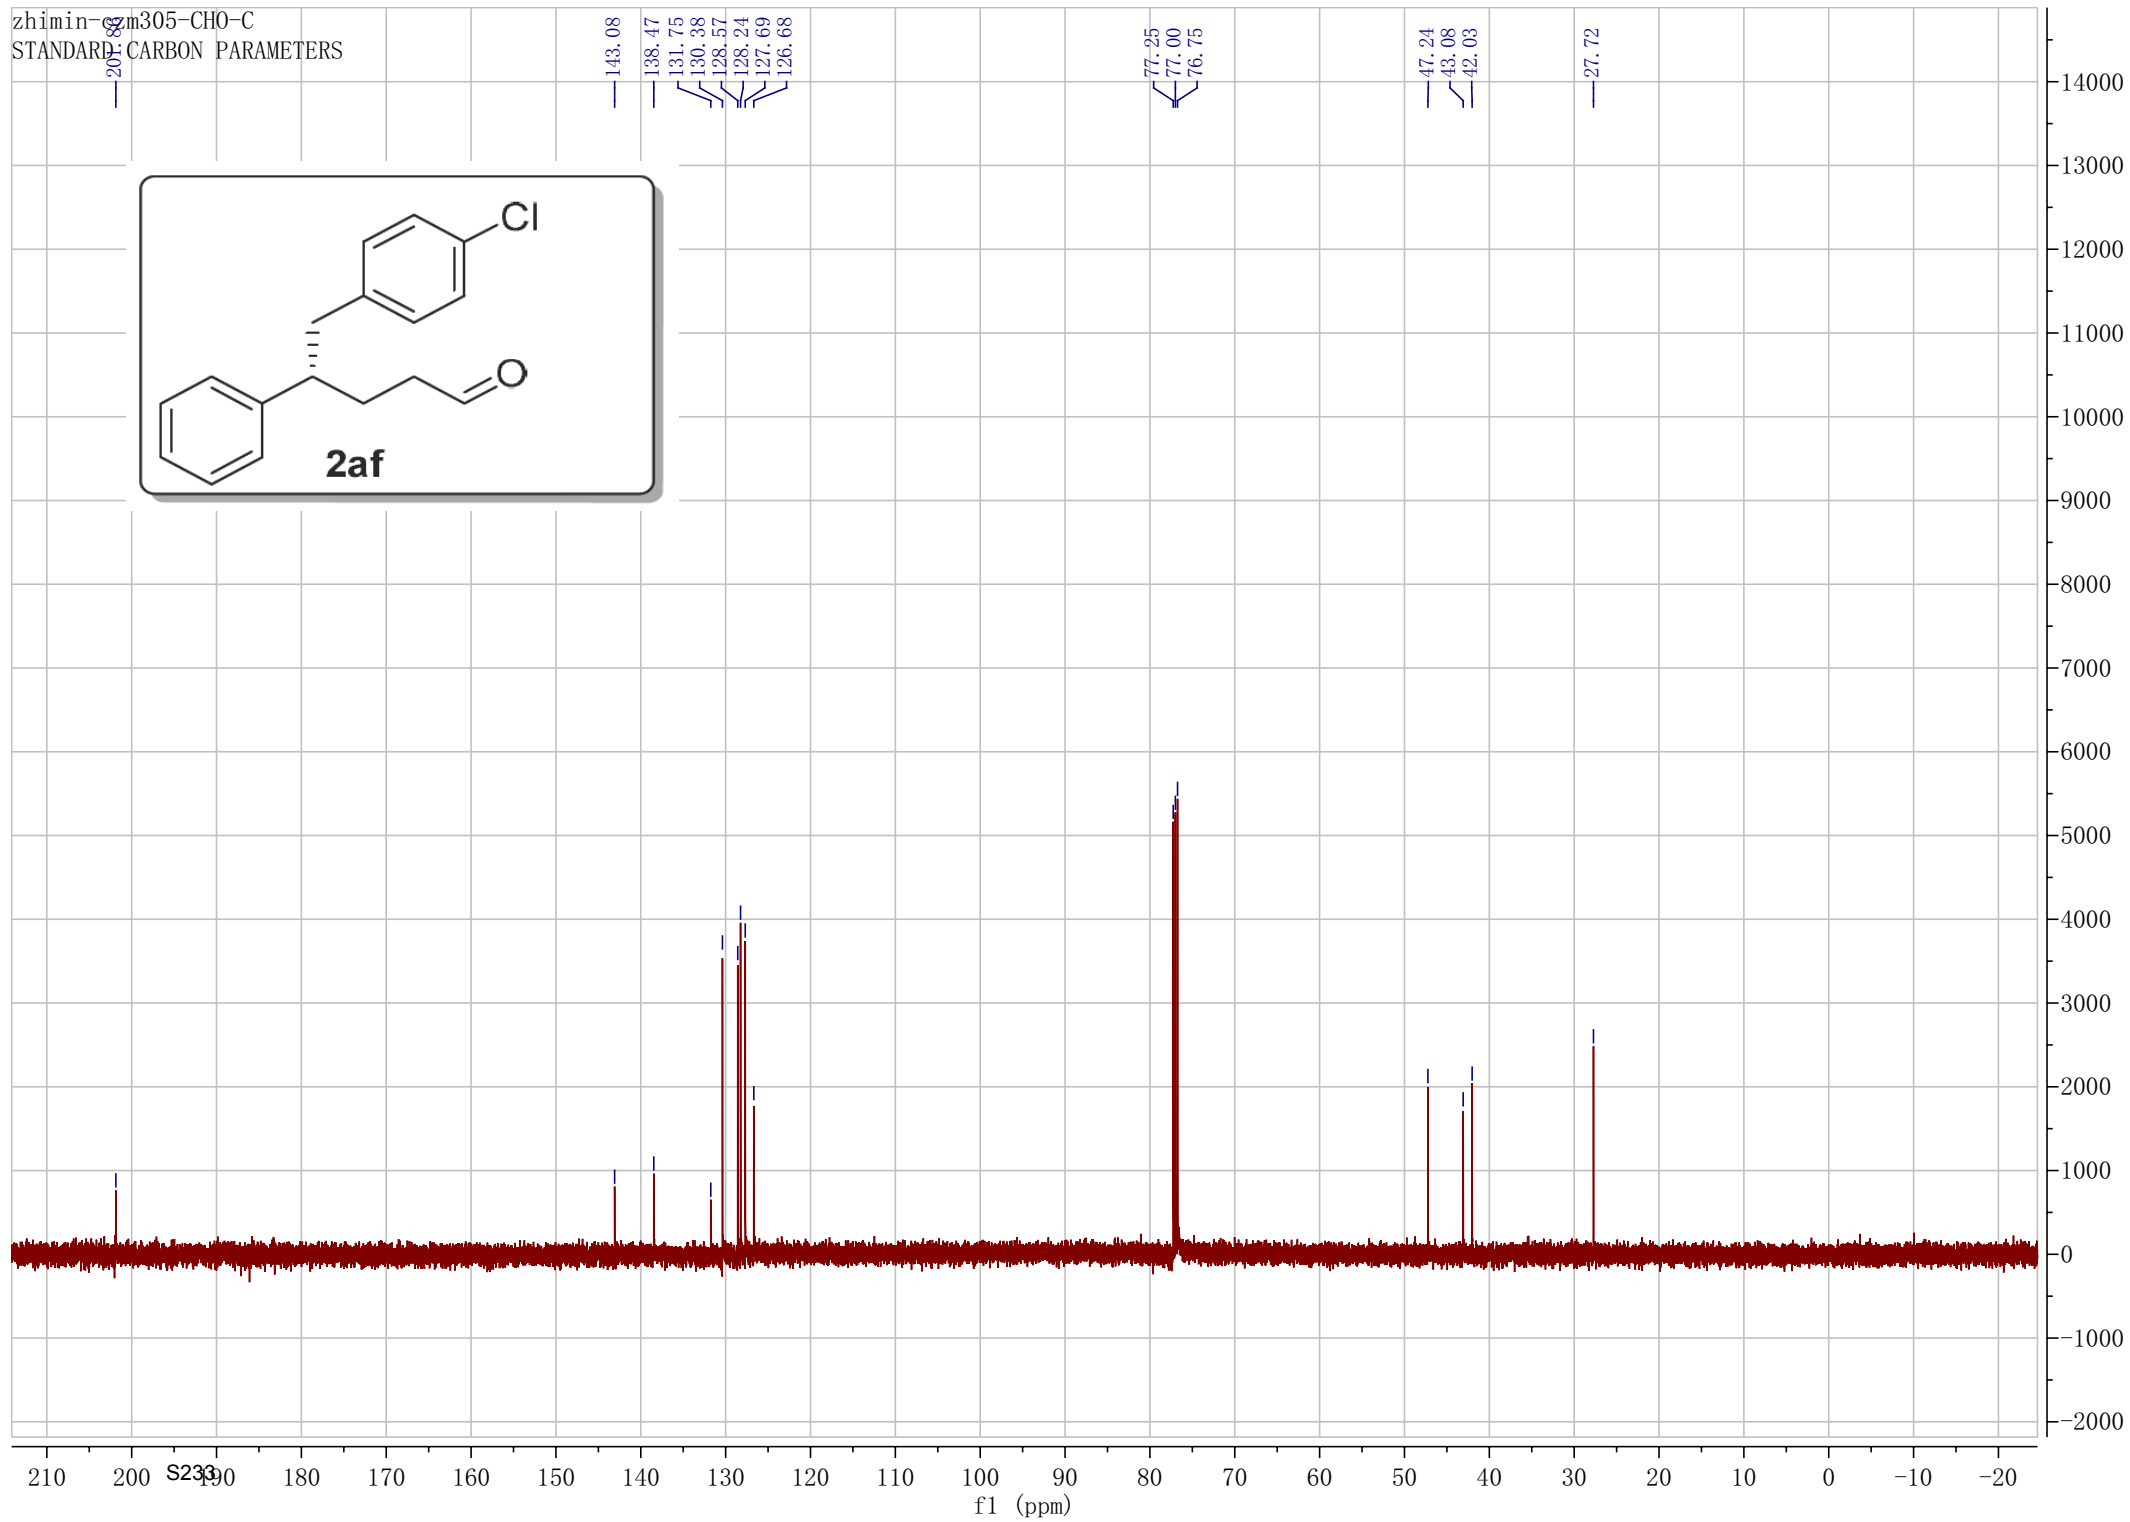

Standard Proton Parameters

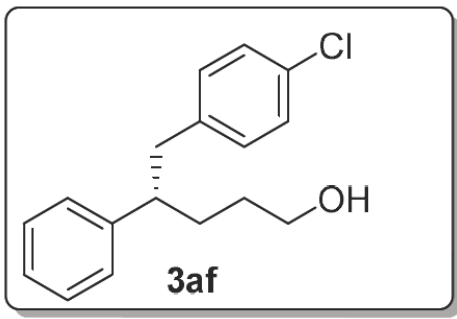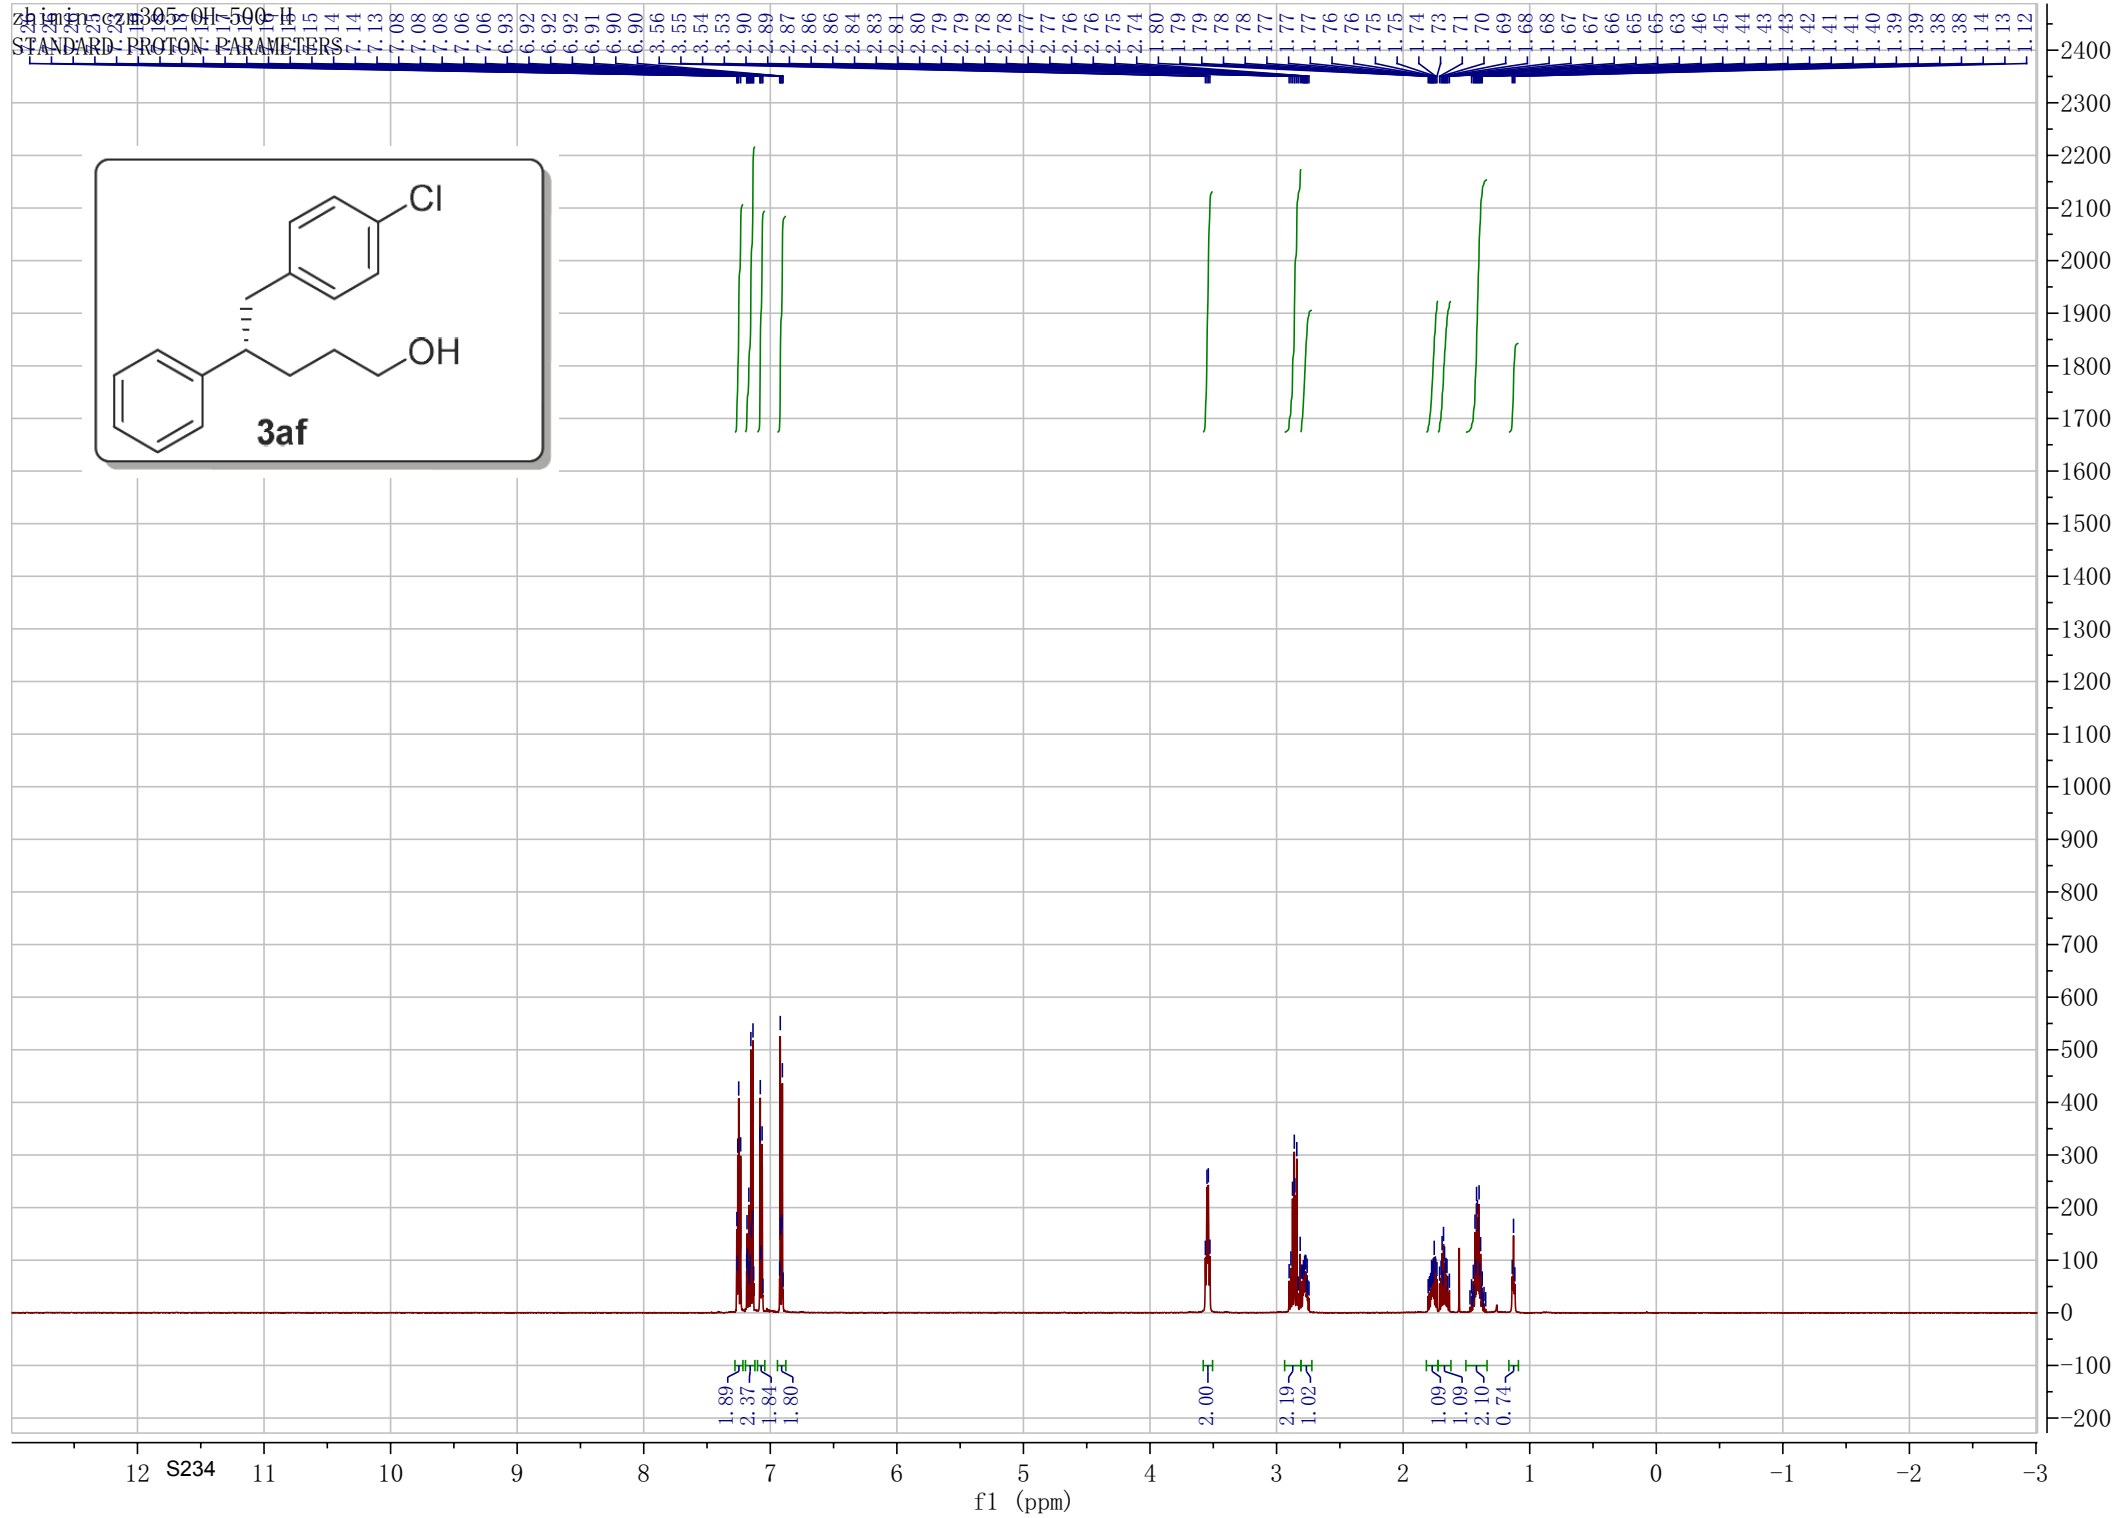



zhimin-czm305-OH-300-C  
13C OBSERVE

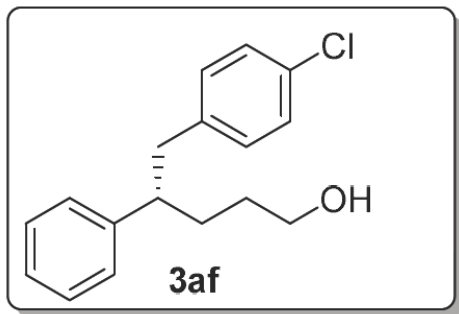

144.17  
138.91  
131.52  
130.40  
128.34  
128.13  
127.69  
126.28

77.42  
77.00  
76.58  
62.86  
47.86  
43.18  
31.69  
30.77

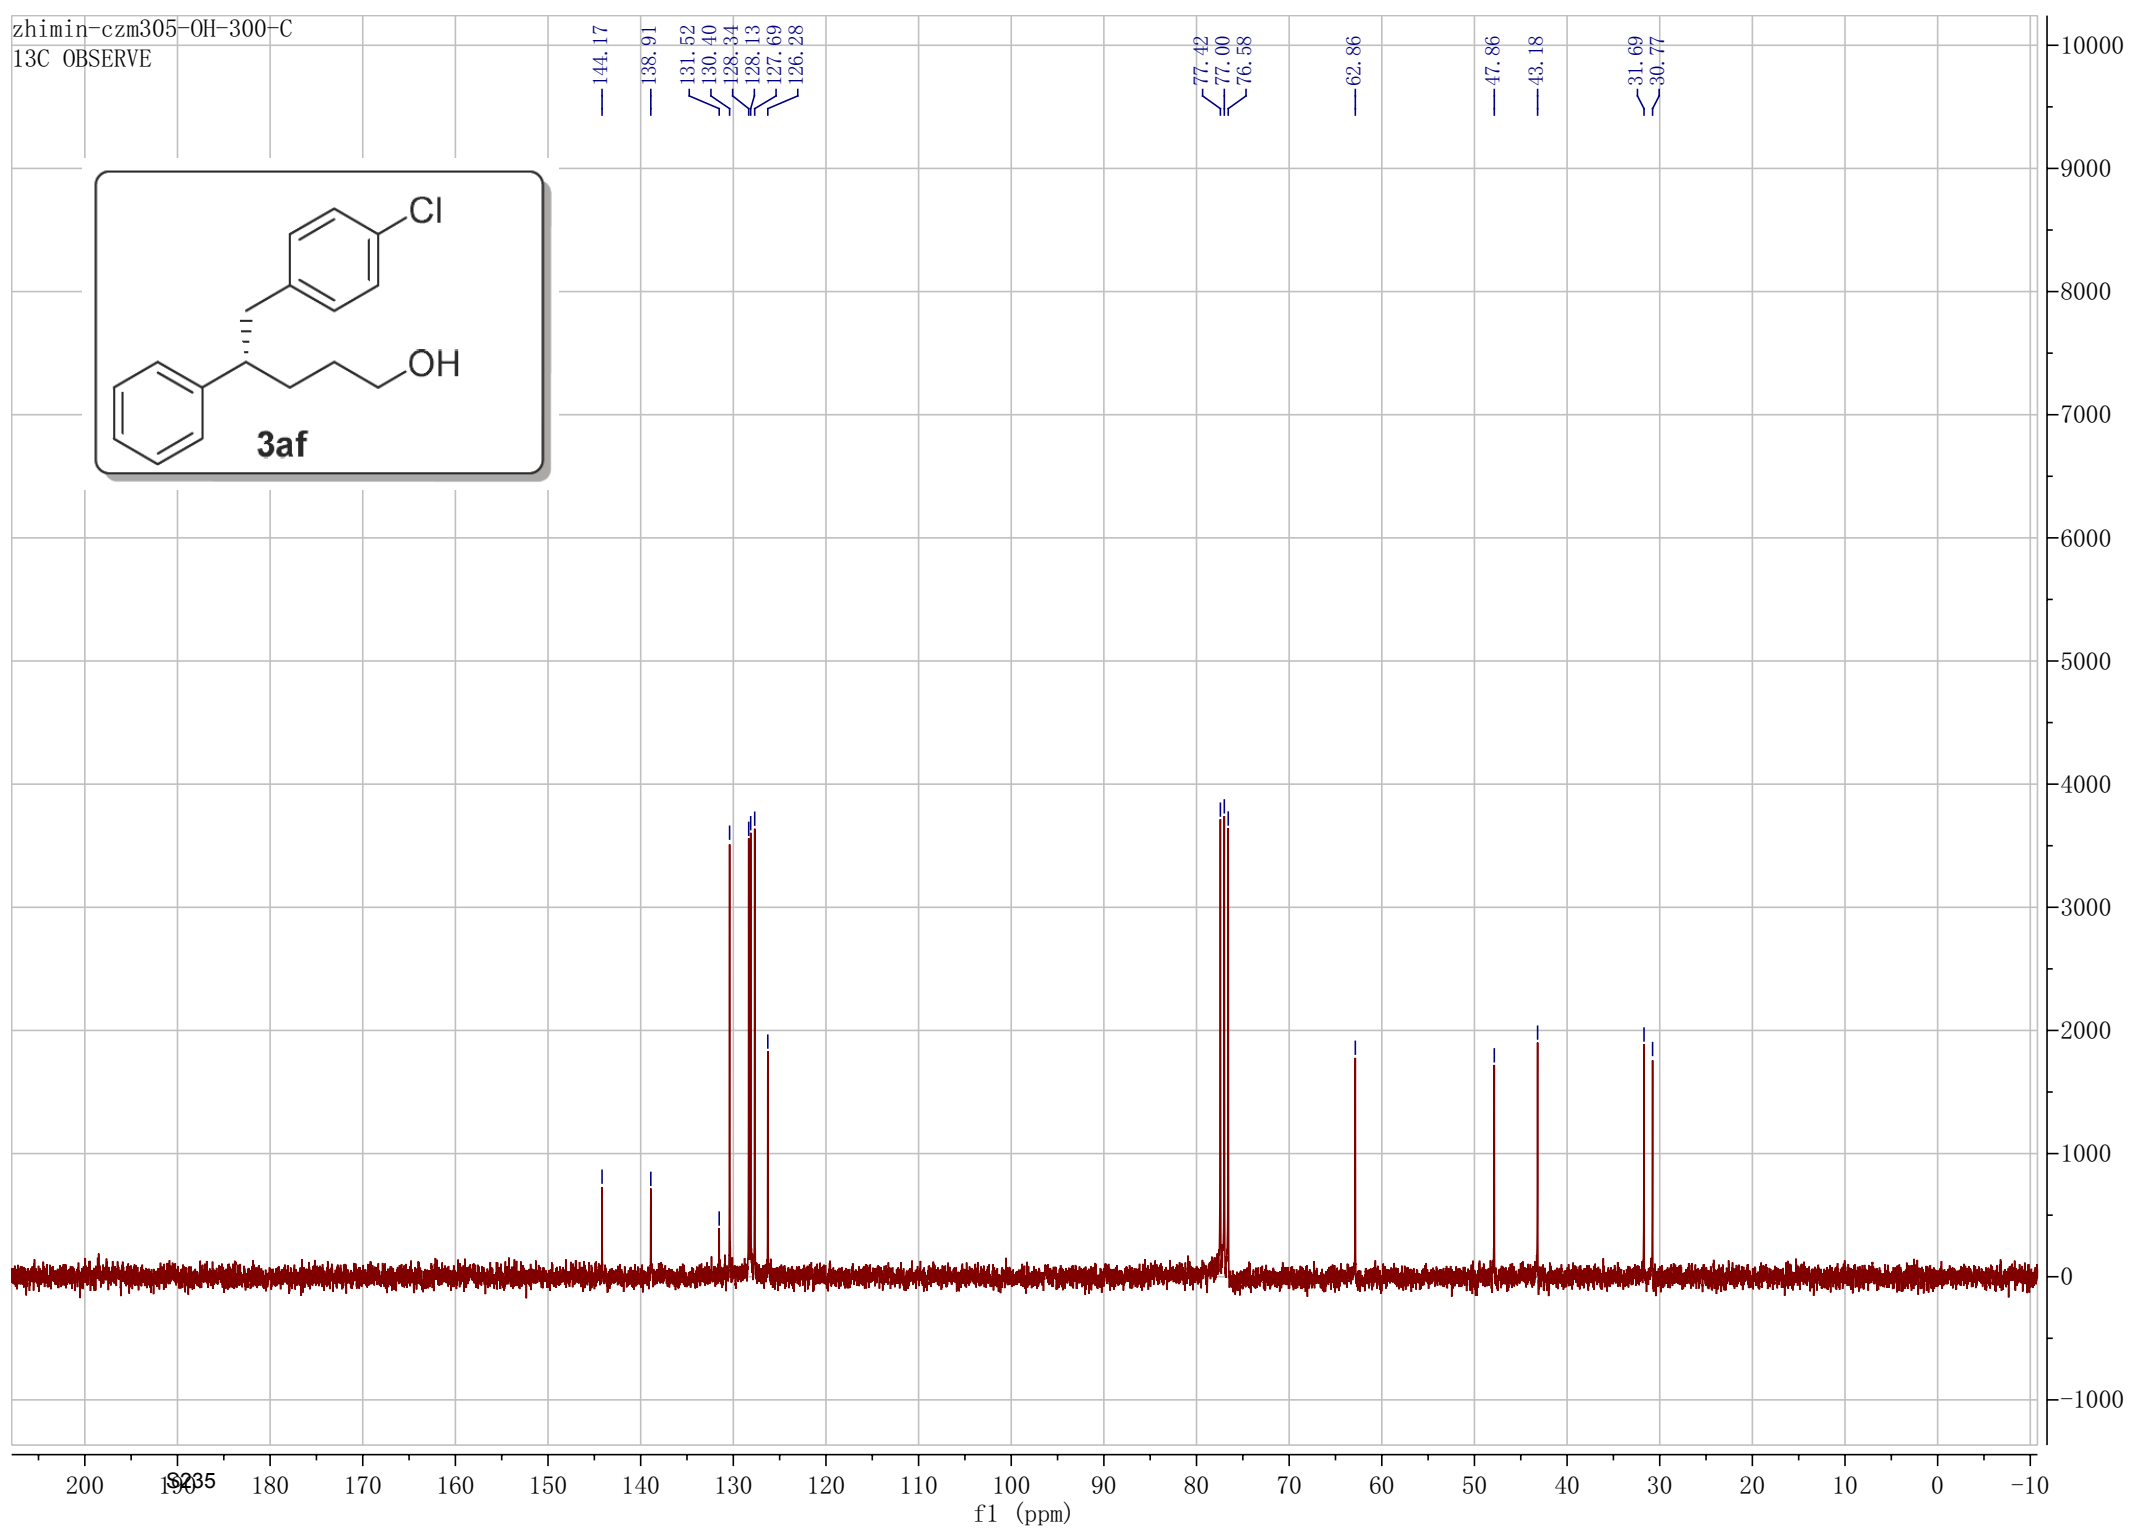

zhimin-czm396-CHO-300-H  
UofUtah Unity 300 NMR  
STANDARD 1H OBSERVE

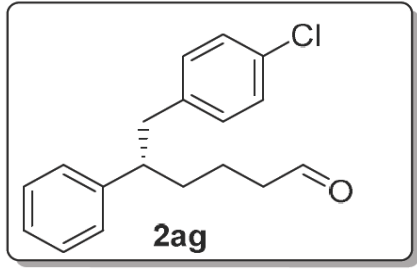

7.29  
7.27  
7.26  
7.26  
7.24  
7.21  
7.21  
7.20  
7.19  
7.18  
7.17  
7.17  
7.16  
7.15  
7.14  
7.13  
7.09  
7.09  
7.06  
6.93  
6.90

2.88  
2.87  
2.85  
2.84  
2.83  
2.79  
2.77  
2.74  
2.72  
2.34  
2.33  
2.32  
1.72  
1.71  
1.70  
1.68  
1.66  
1.63  
1.53  
1.50  
1.48  
1.45  
1.42

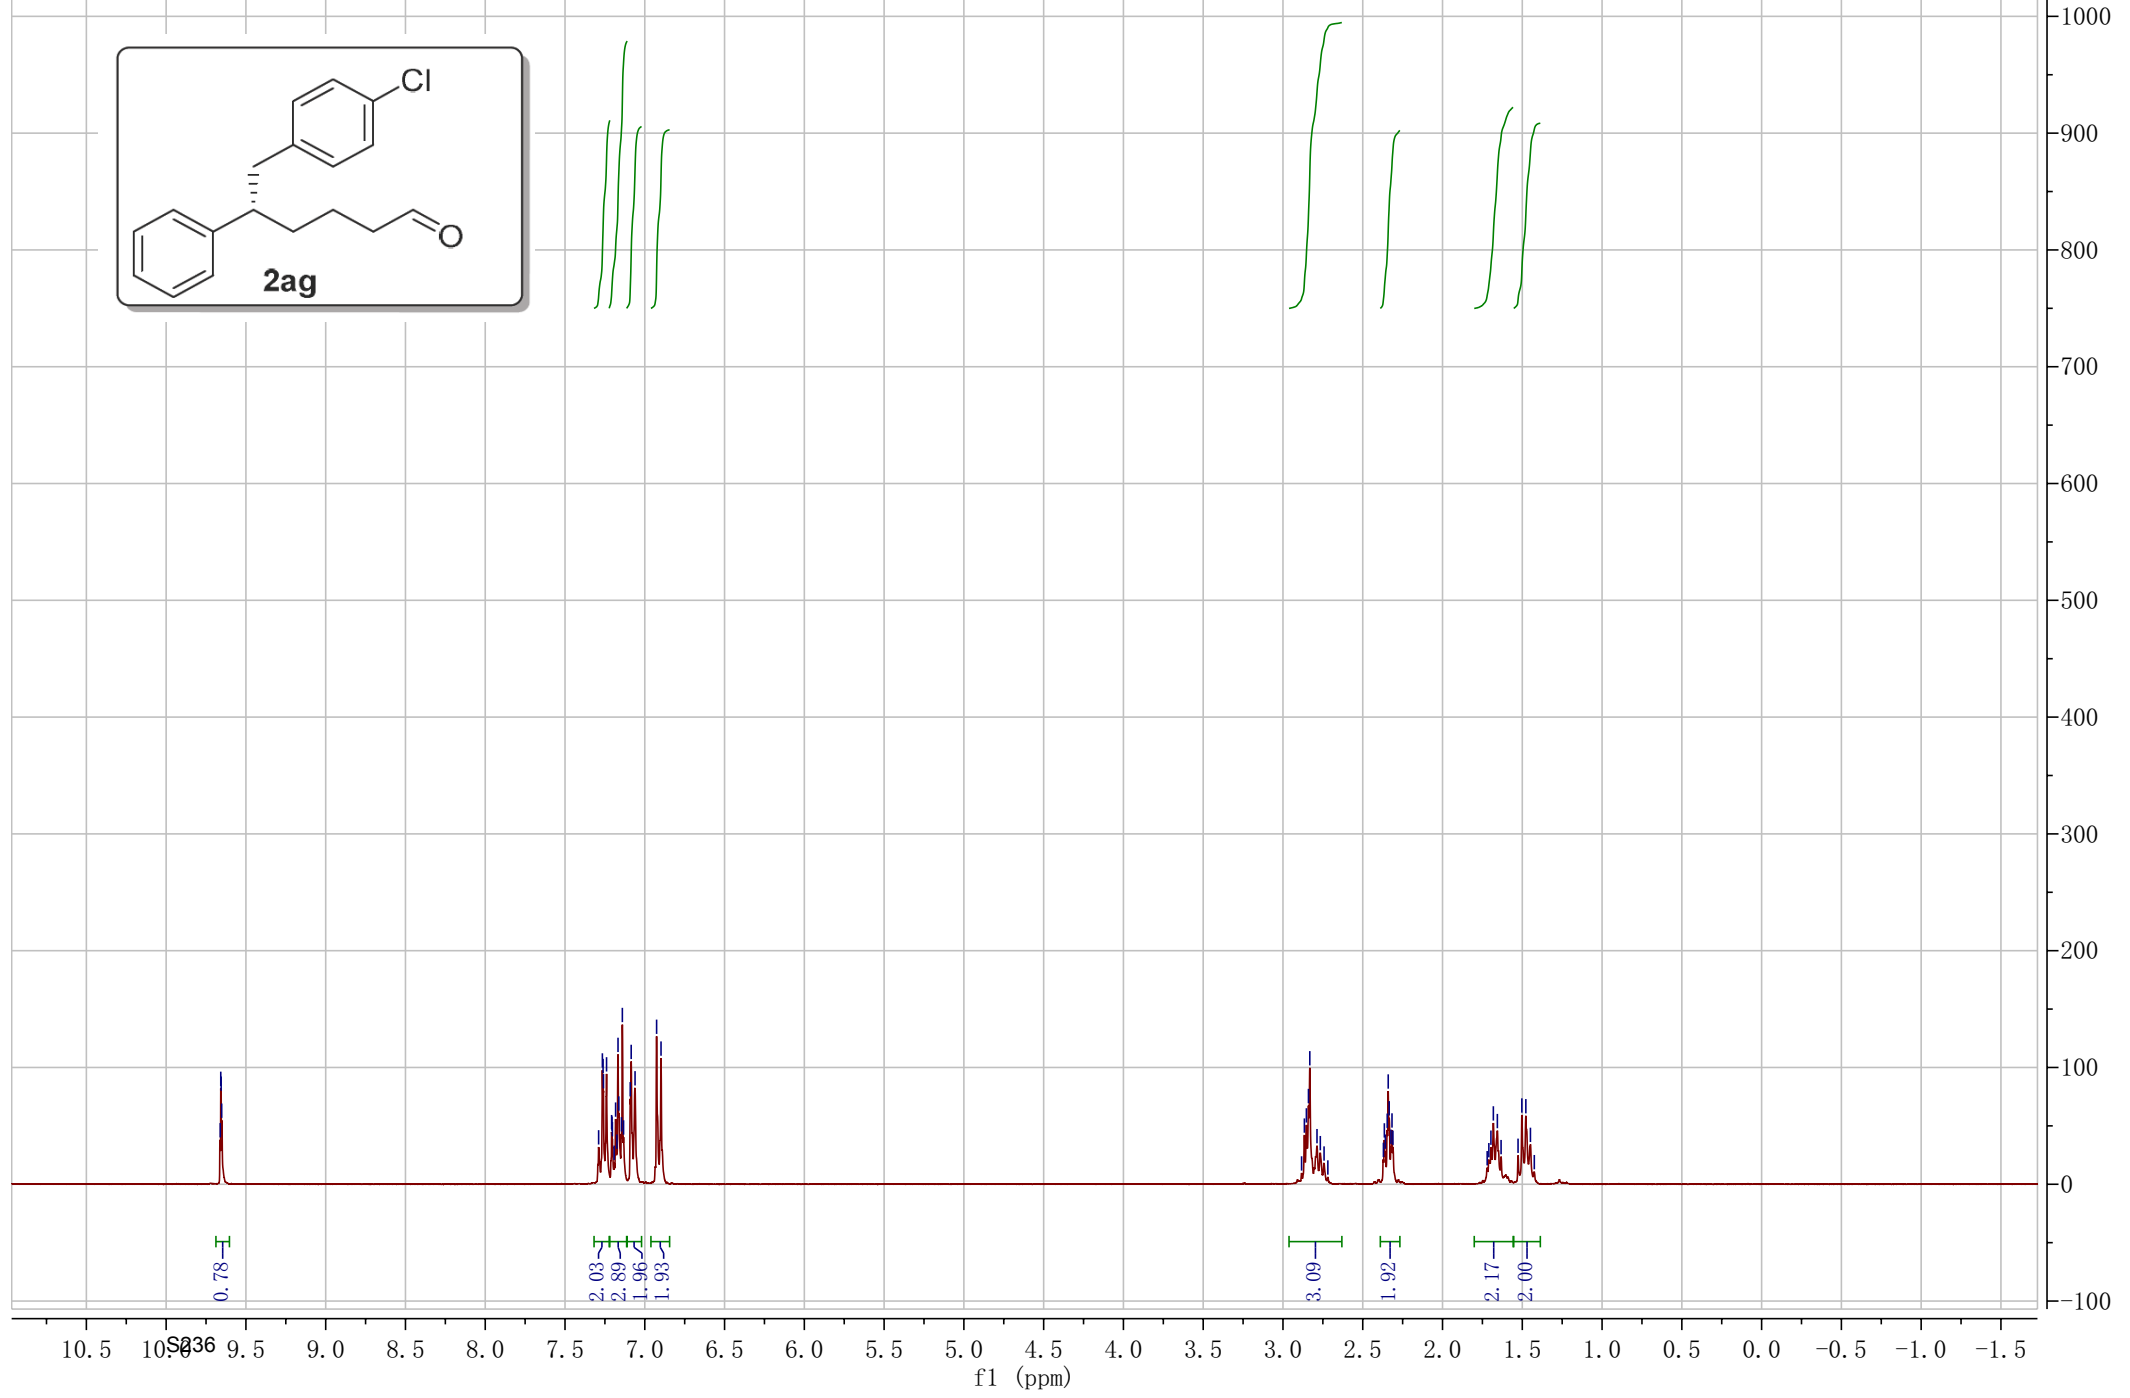

zhimin-czm396-CHO-300-C  
13C OBSERVE

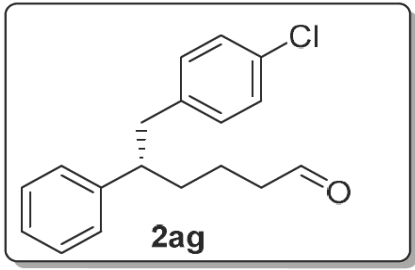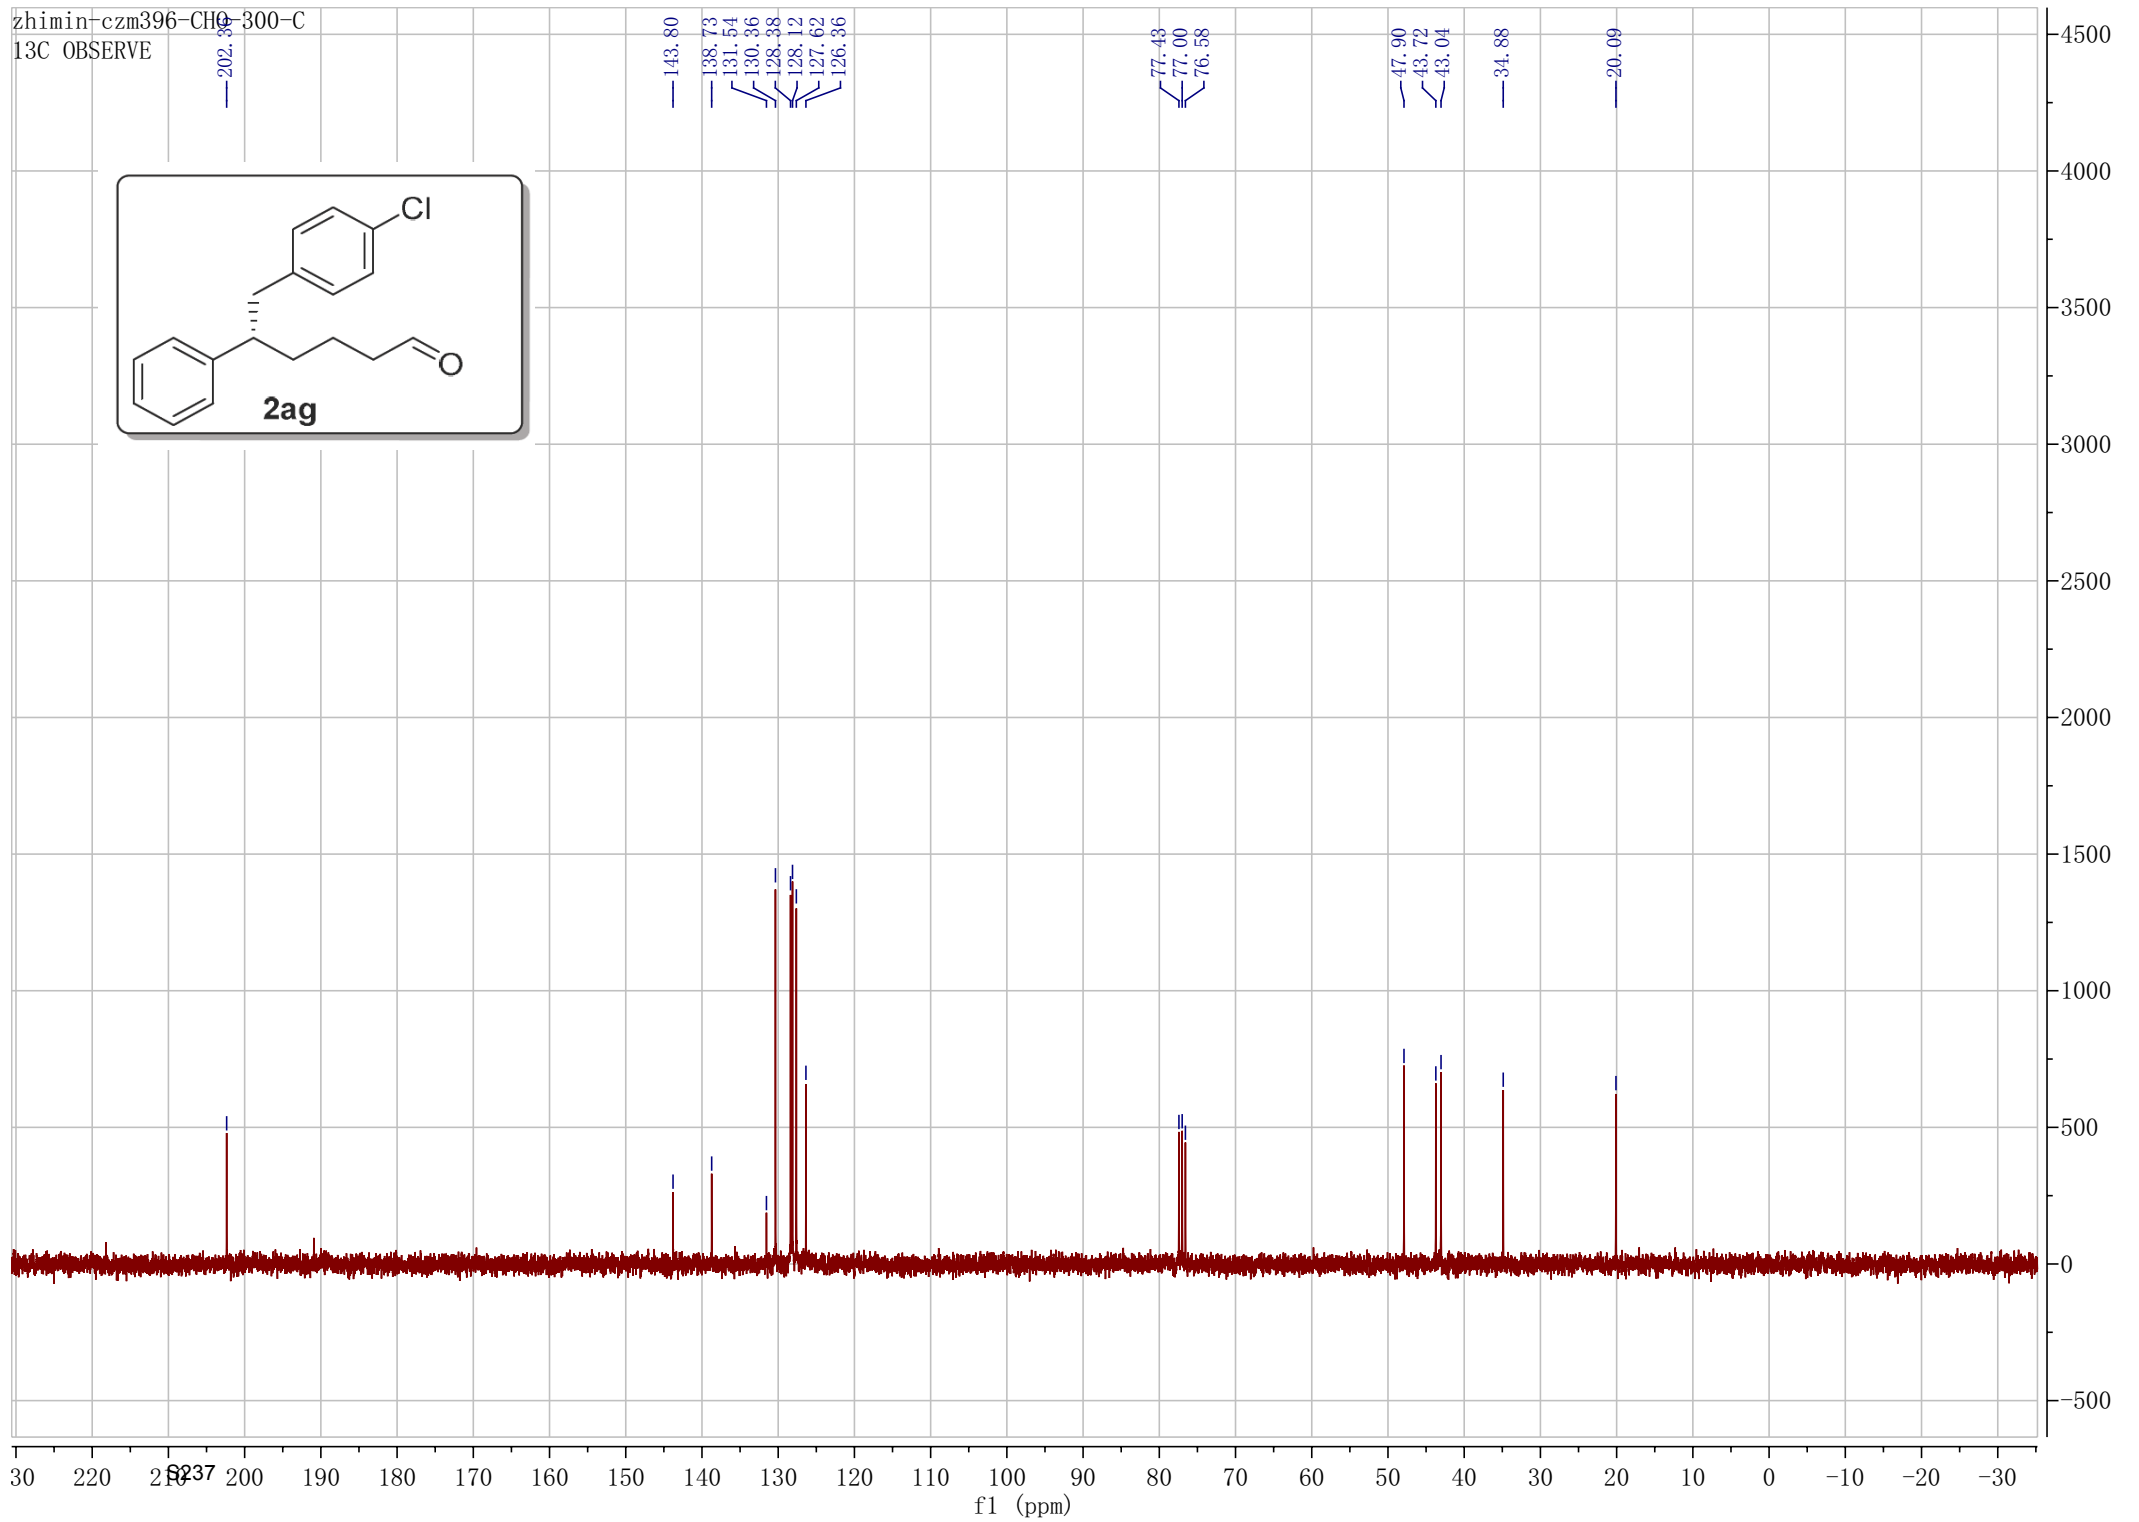

zhimin-czm396-OH-300-H  
UofUtah Unity300 NMR  
STANDARD 1H OBSERVE

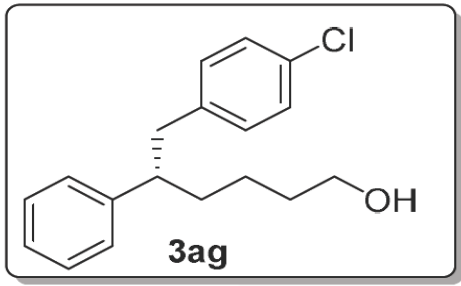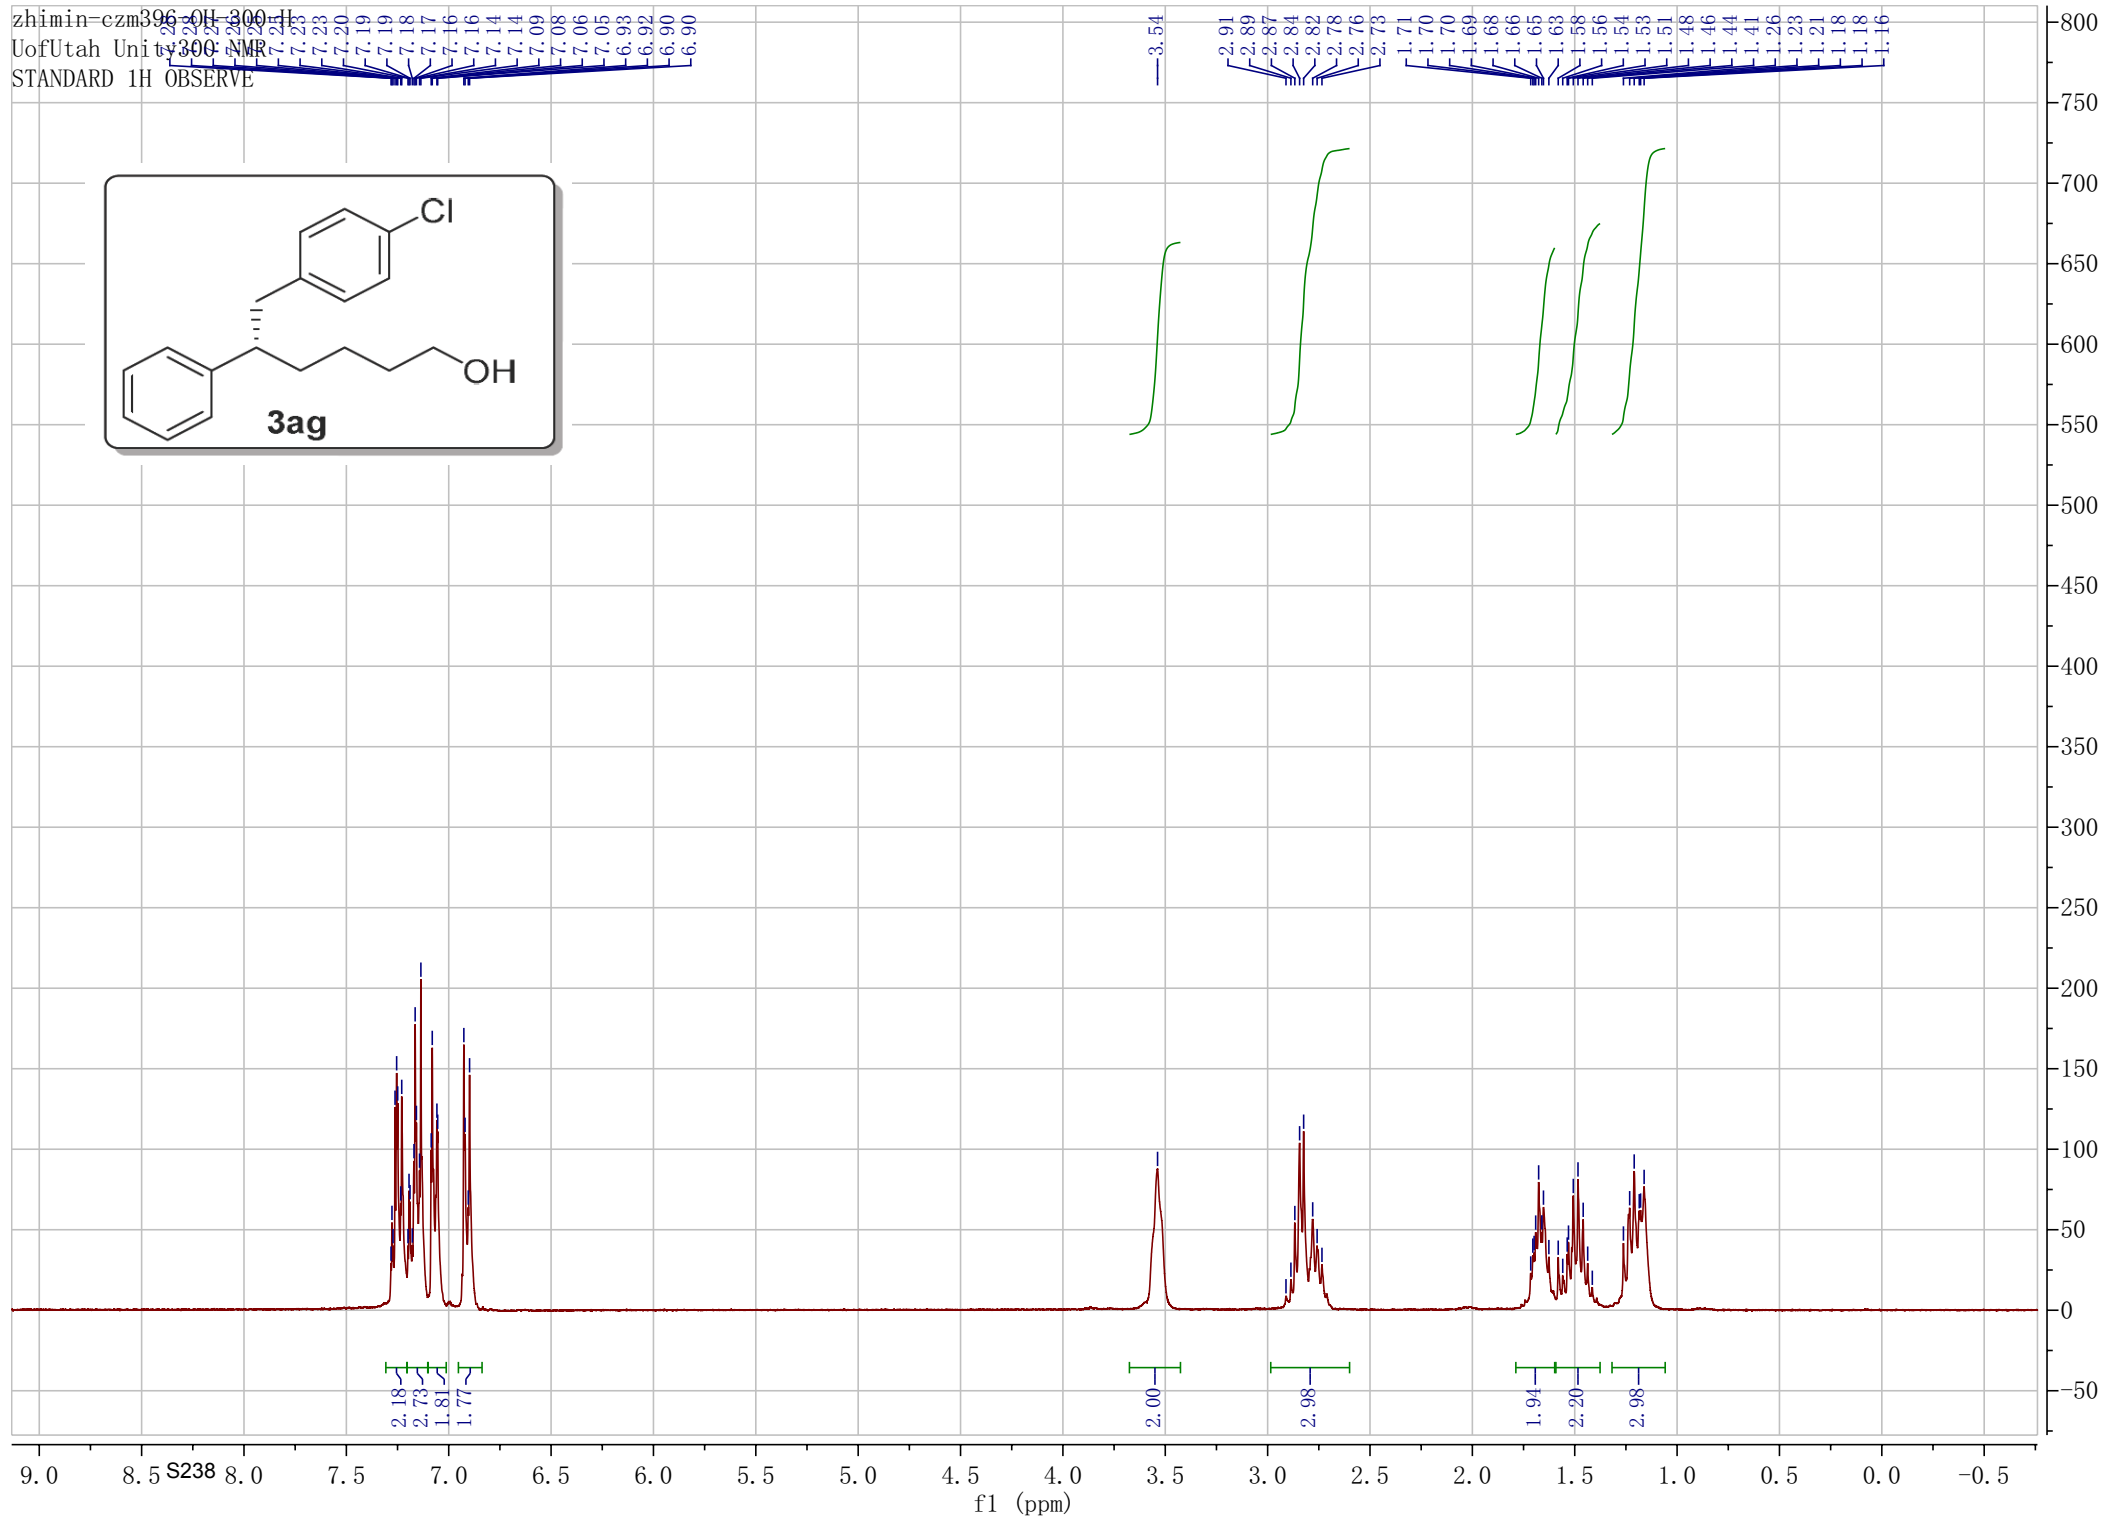

zhimin-czm396-OH-300-C  
13C-OBSERVE

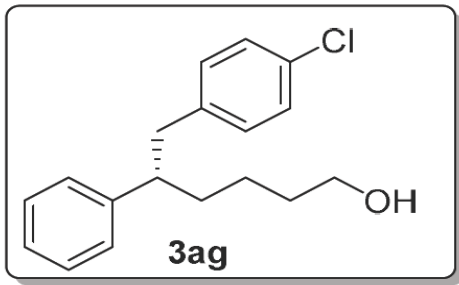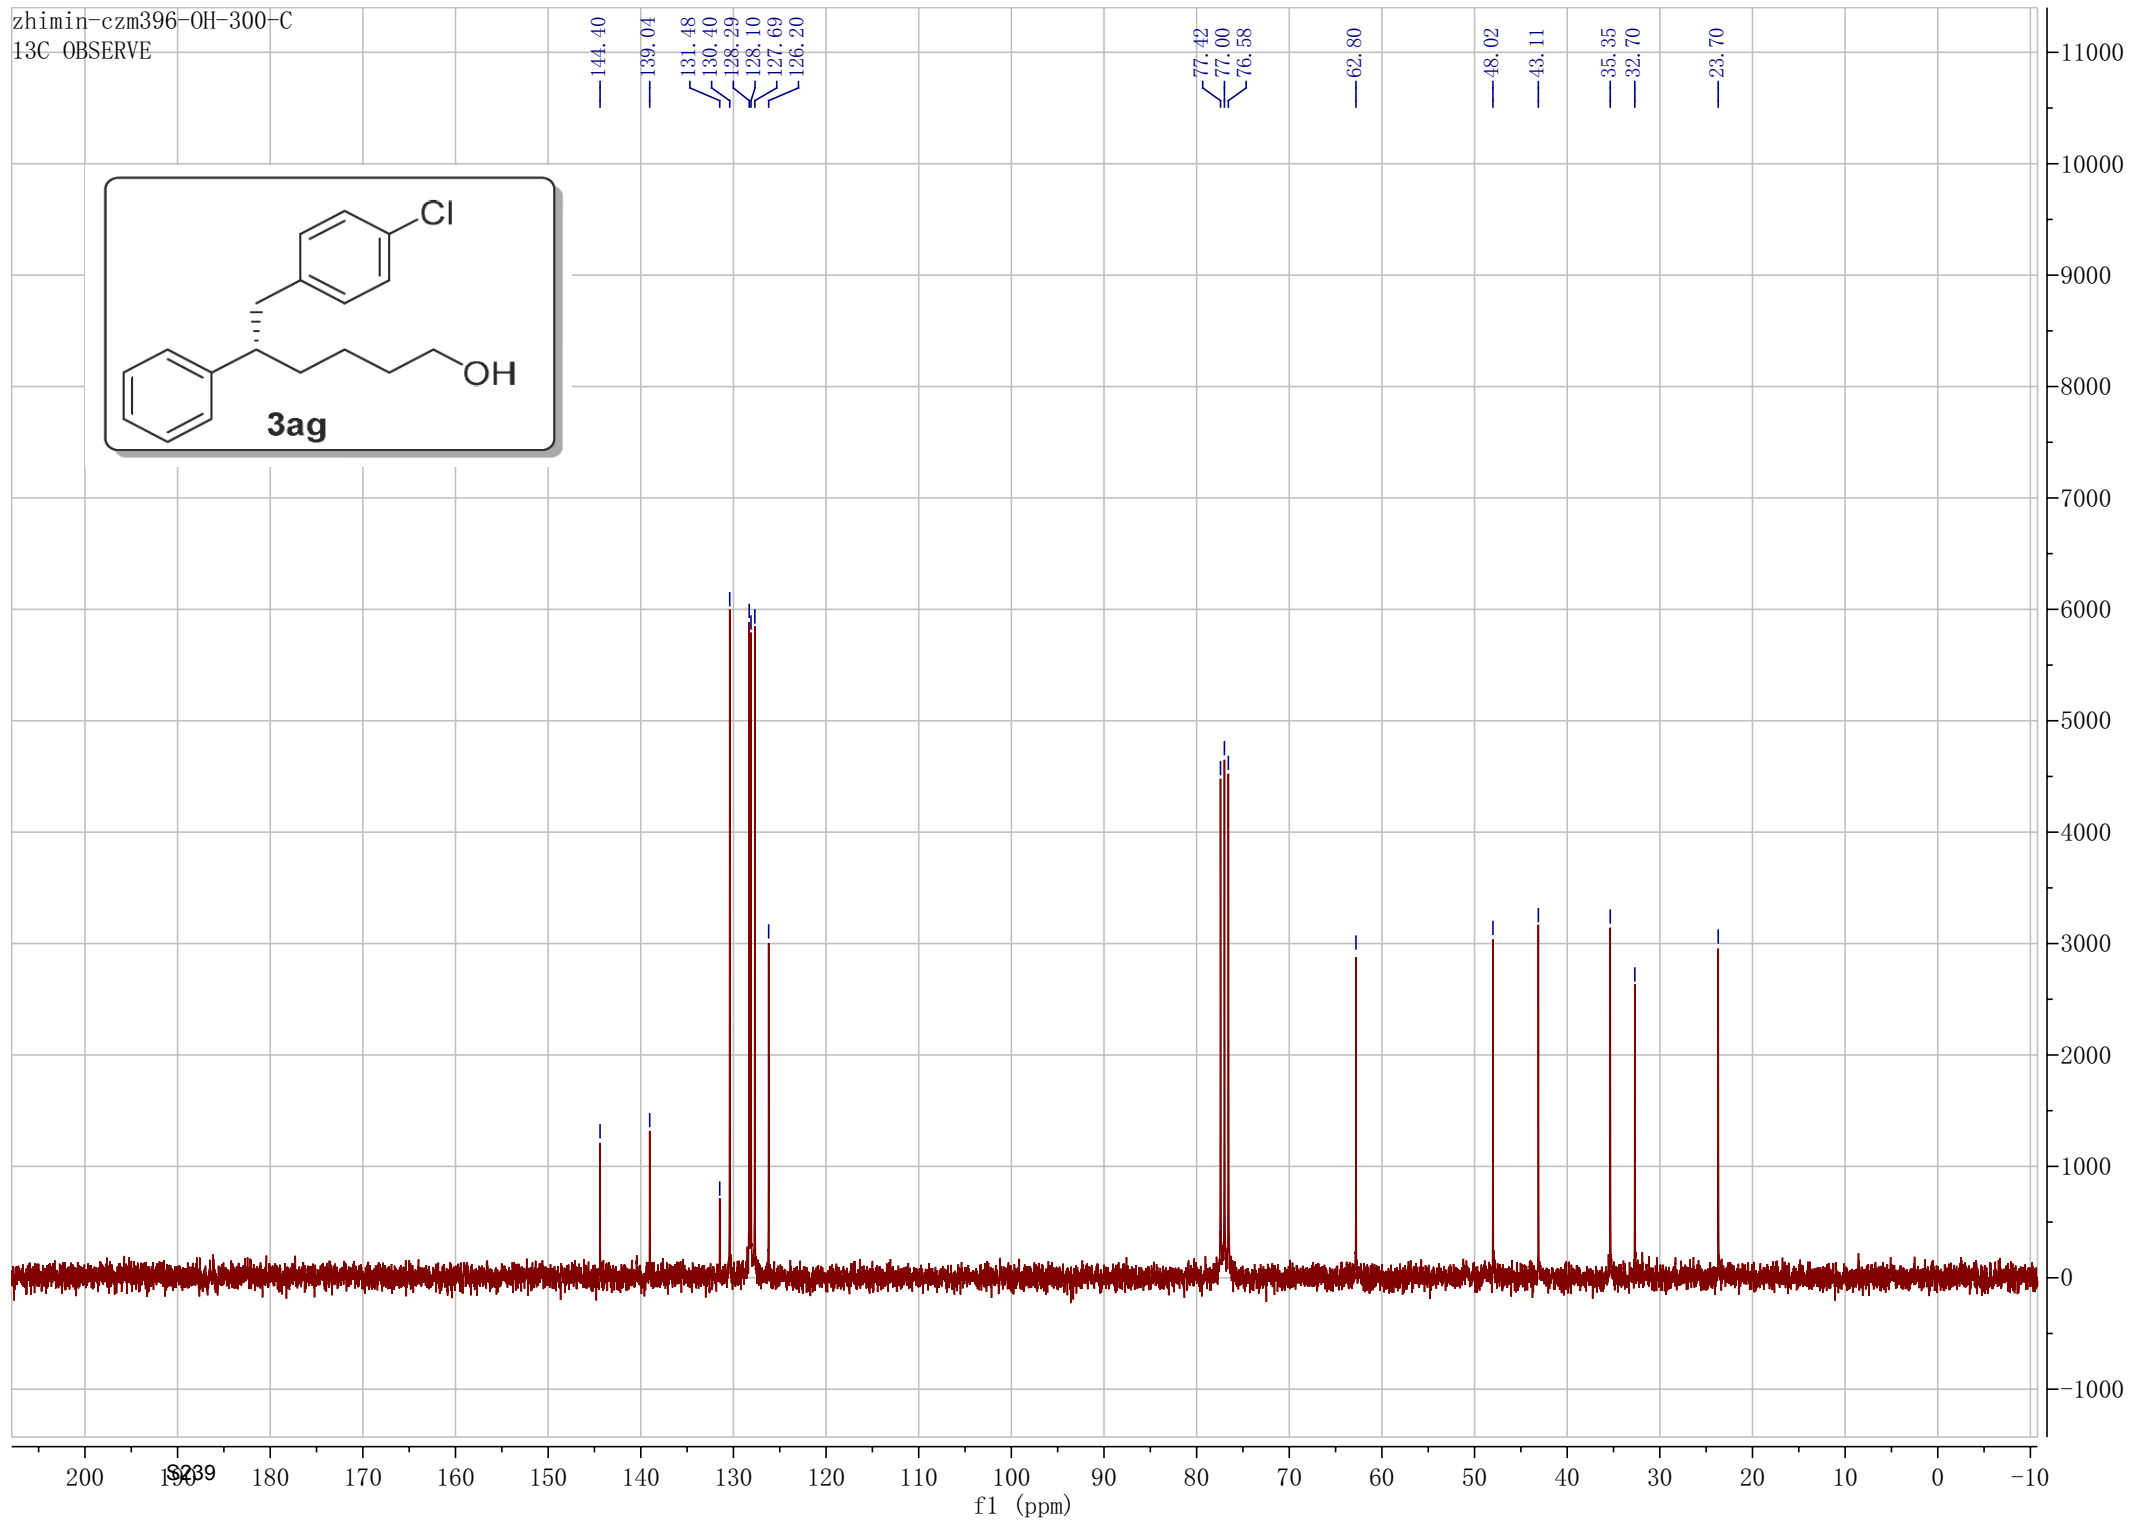

zhimin-czm462-GH0-300-H  
UofUtah Unity 300-MR  
STANDARD 1H OBSERVE

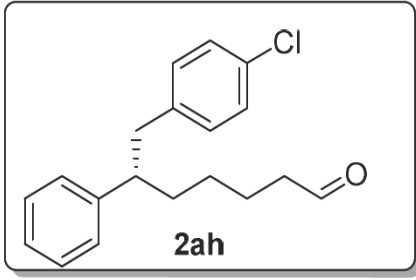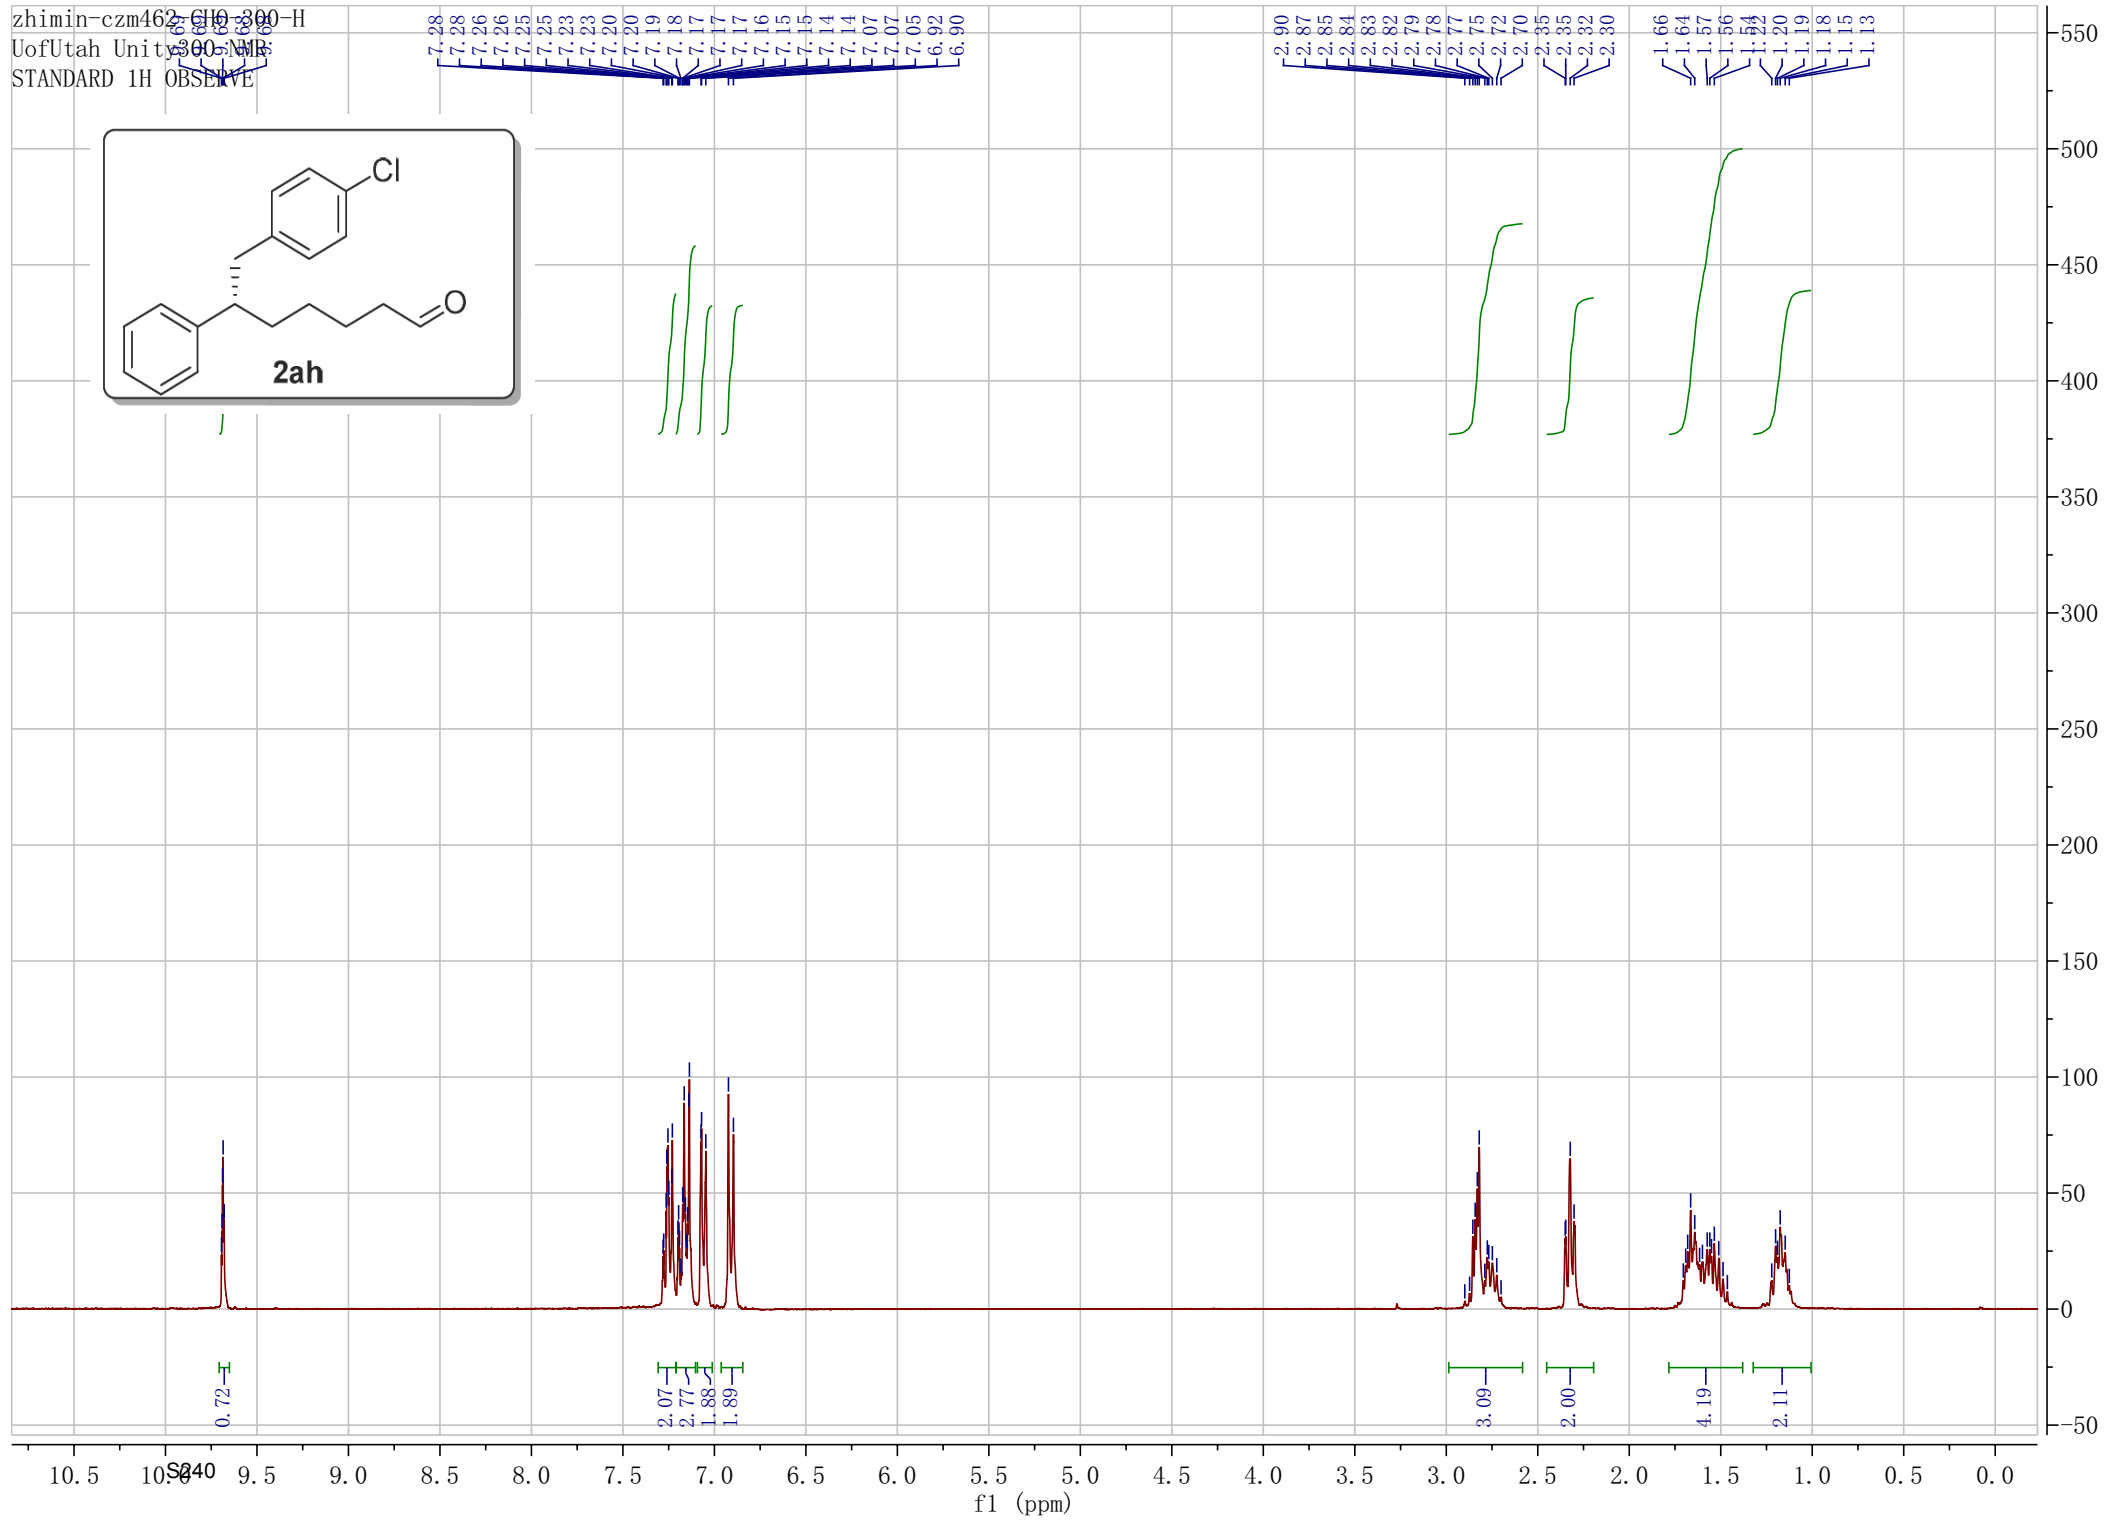

zhimin-czm462-CH0-300-C  
13C OBSERVE

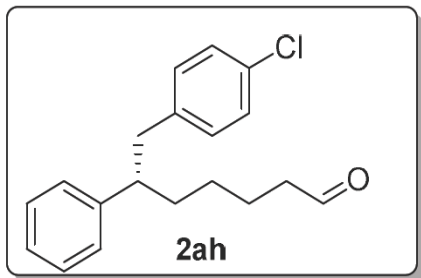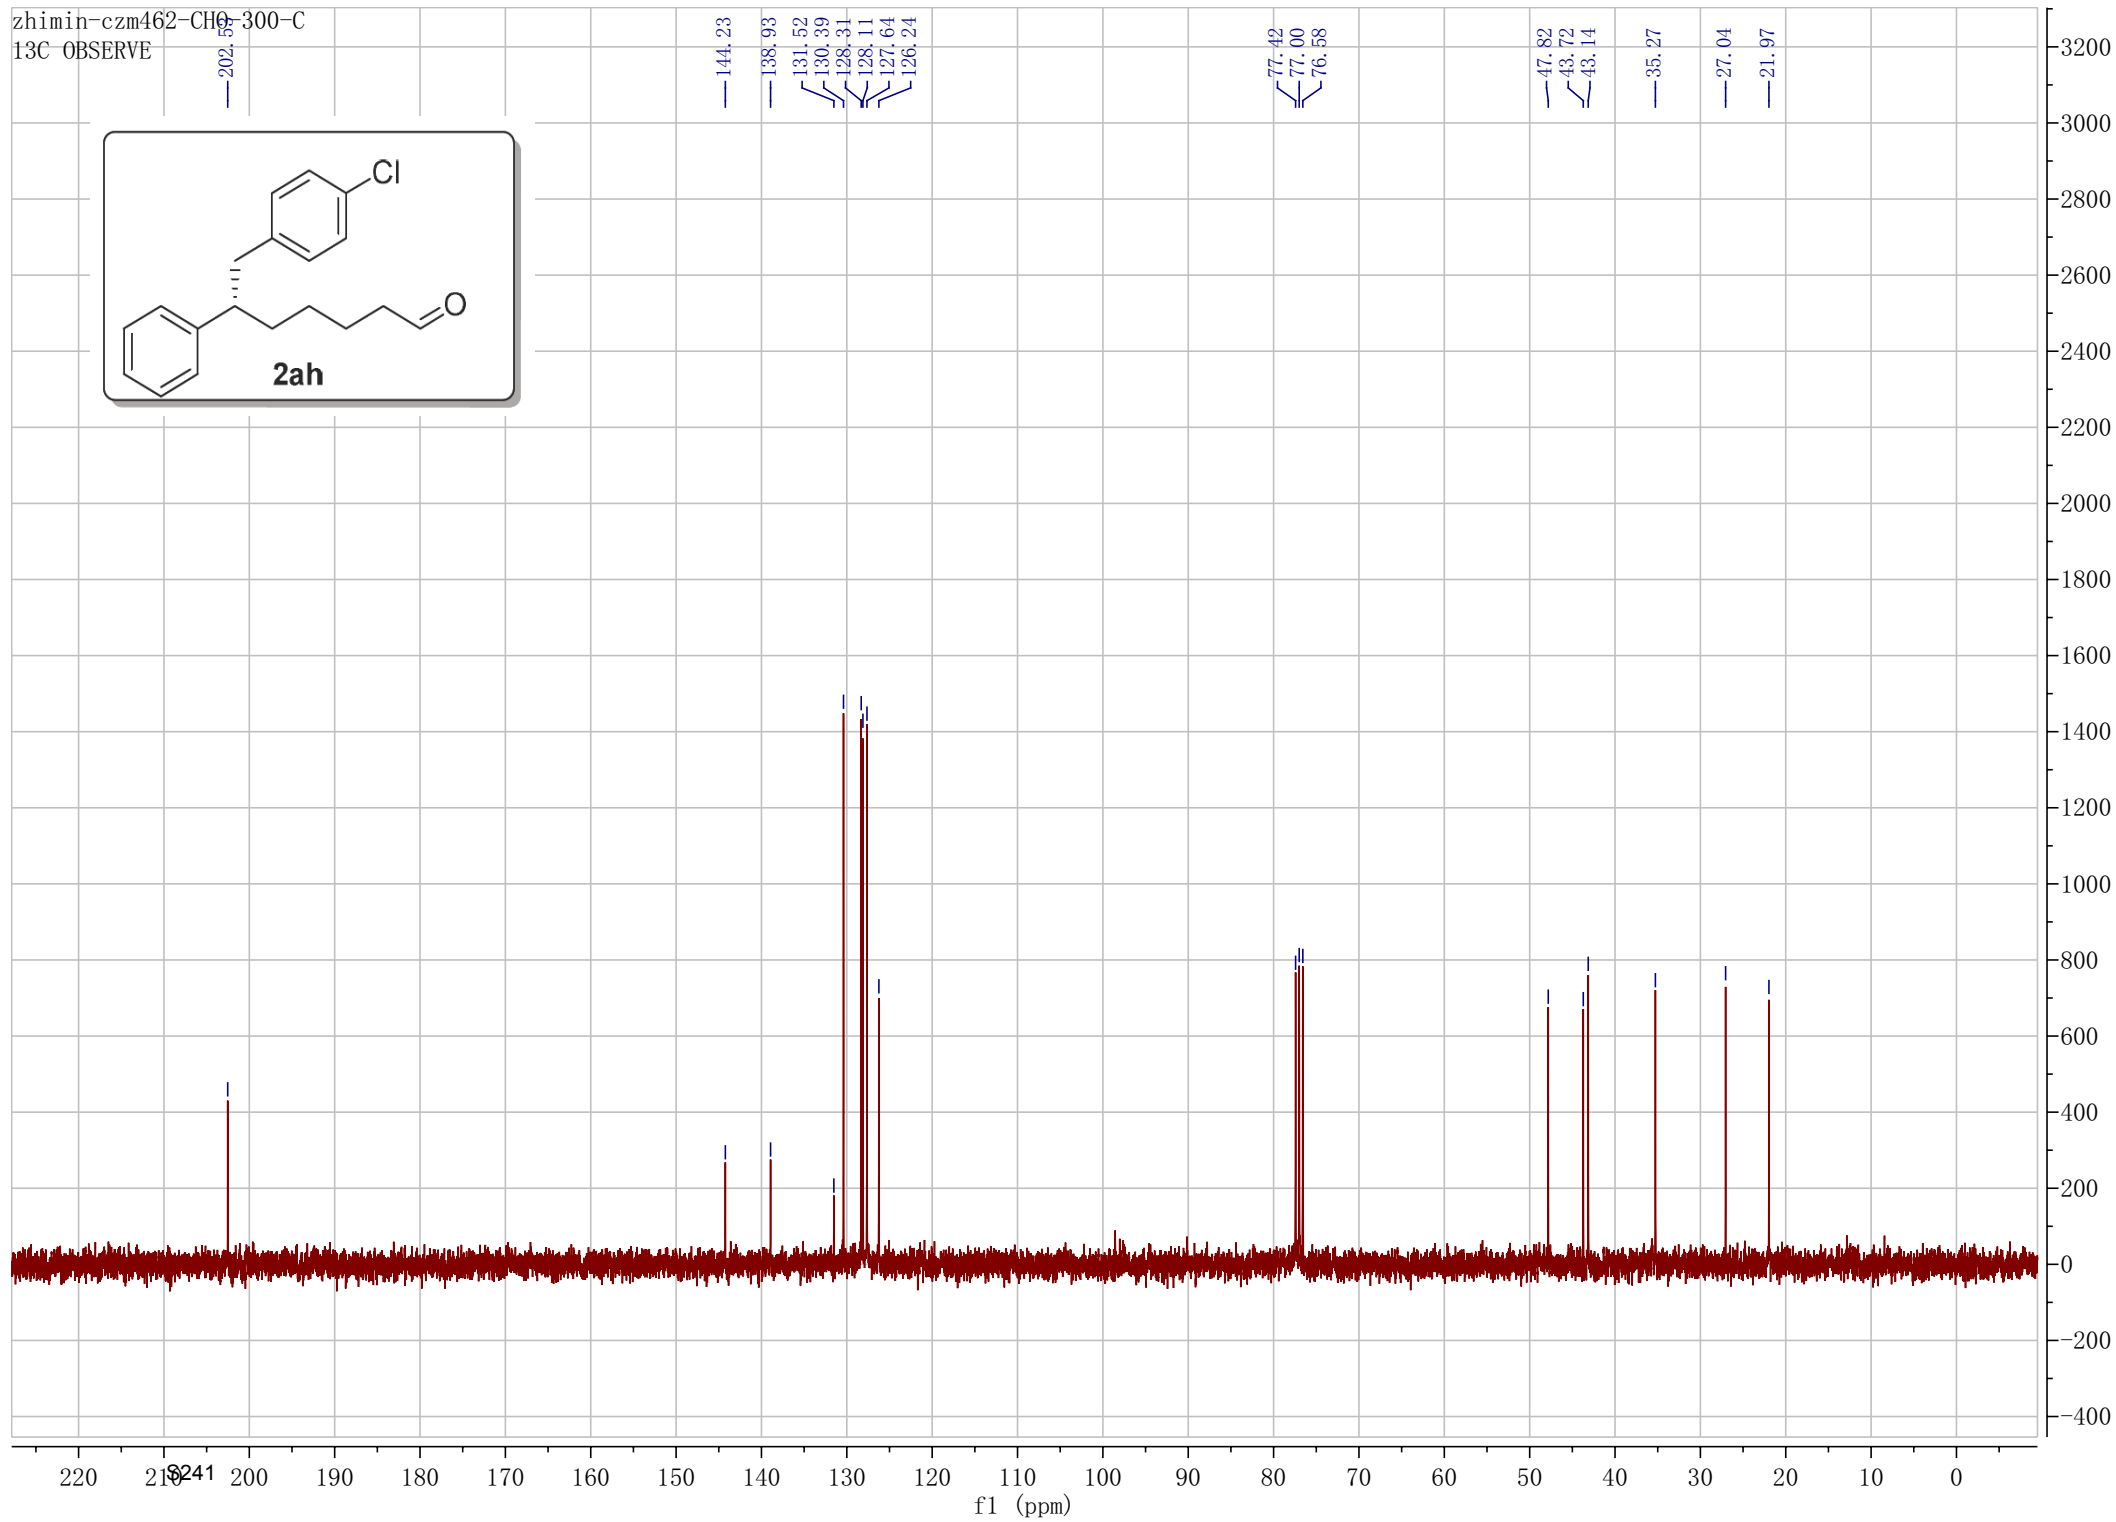

zhimin-czm462-OH-300-H  
UofUtah Unity300 NMR  
STANDARD 1H OBSERVE

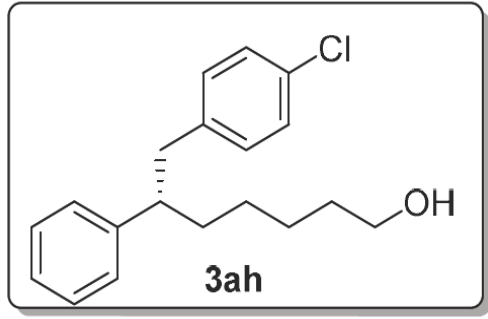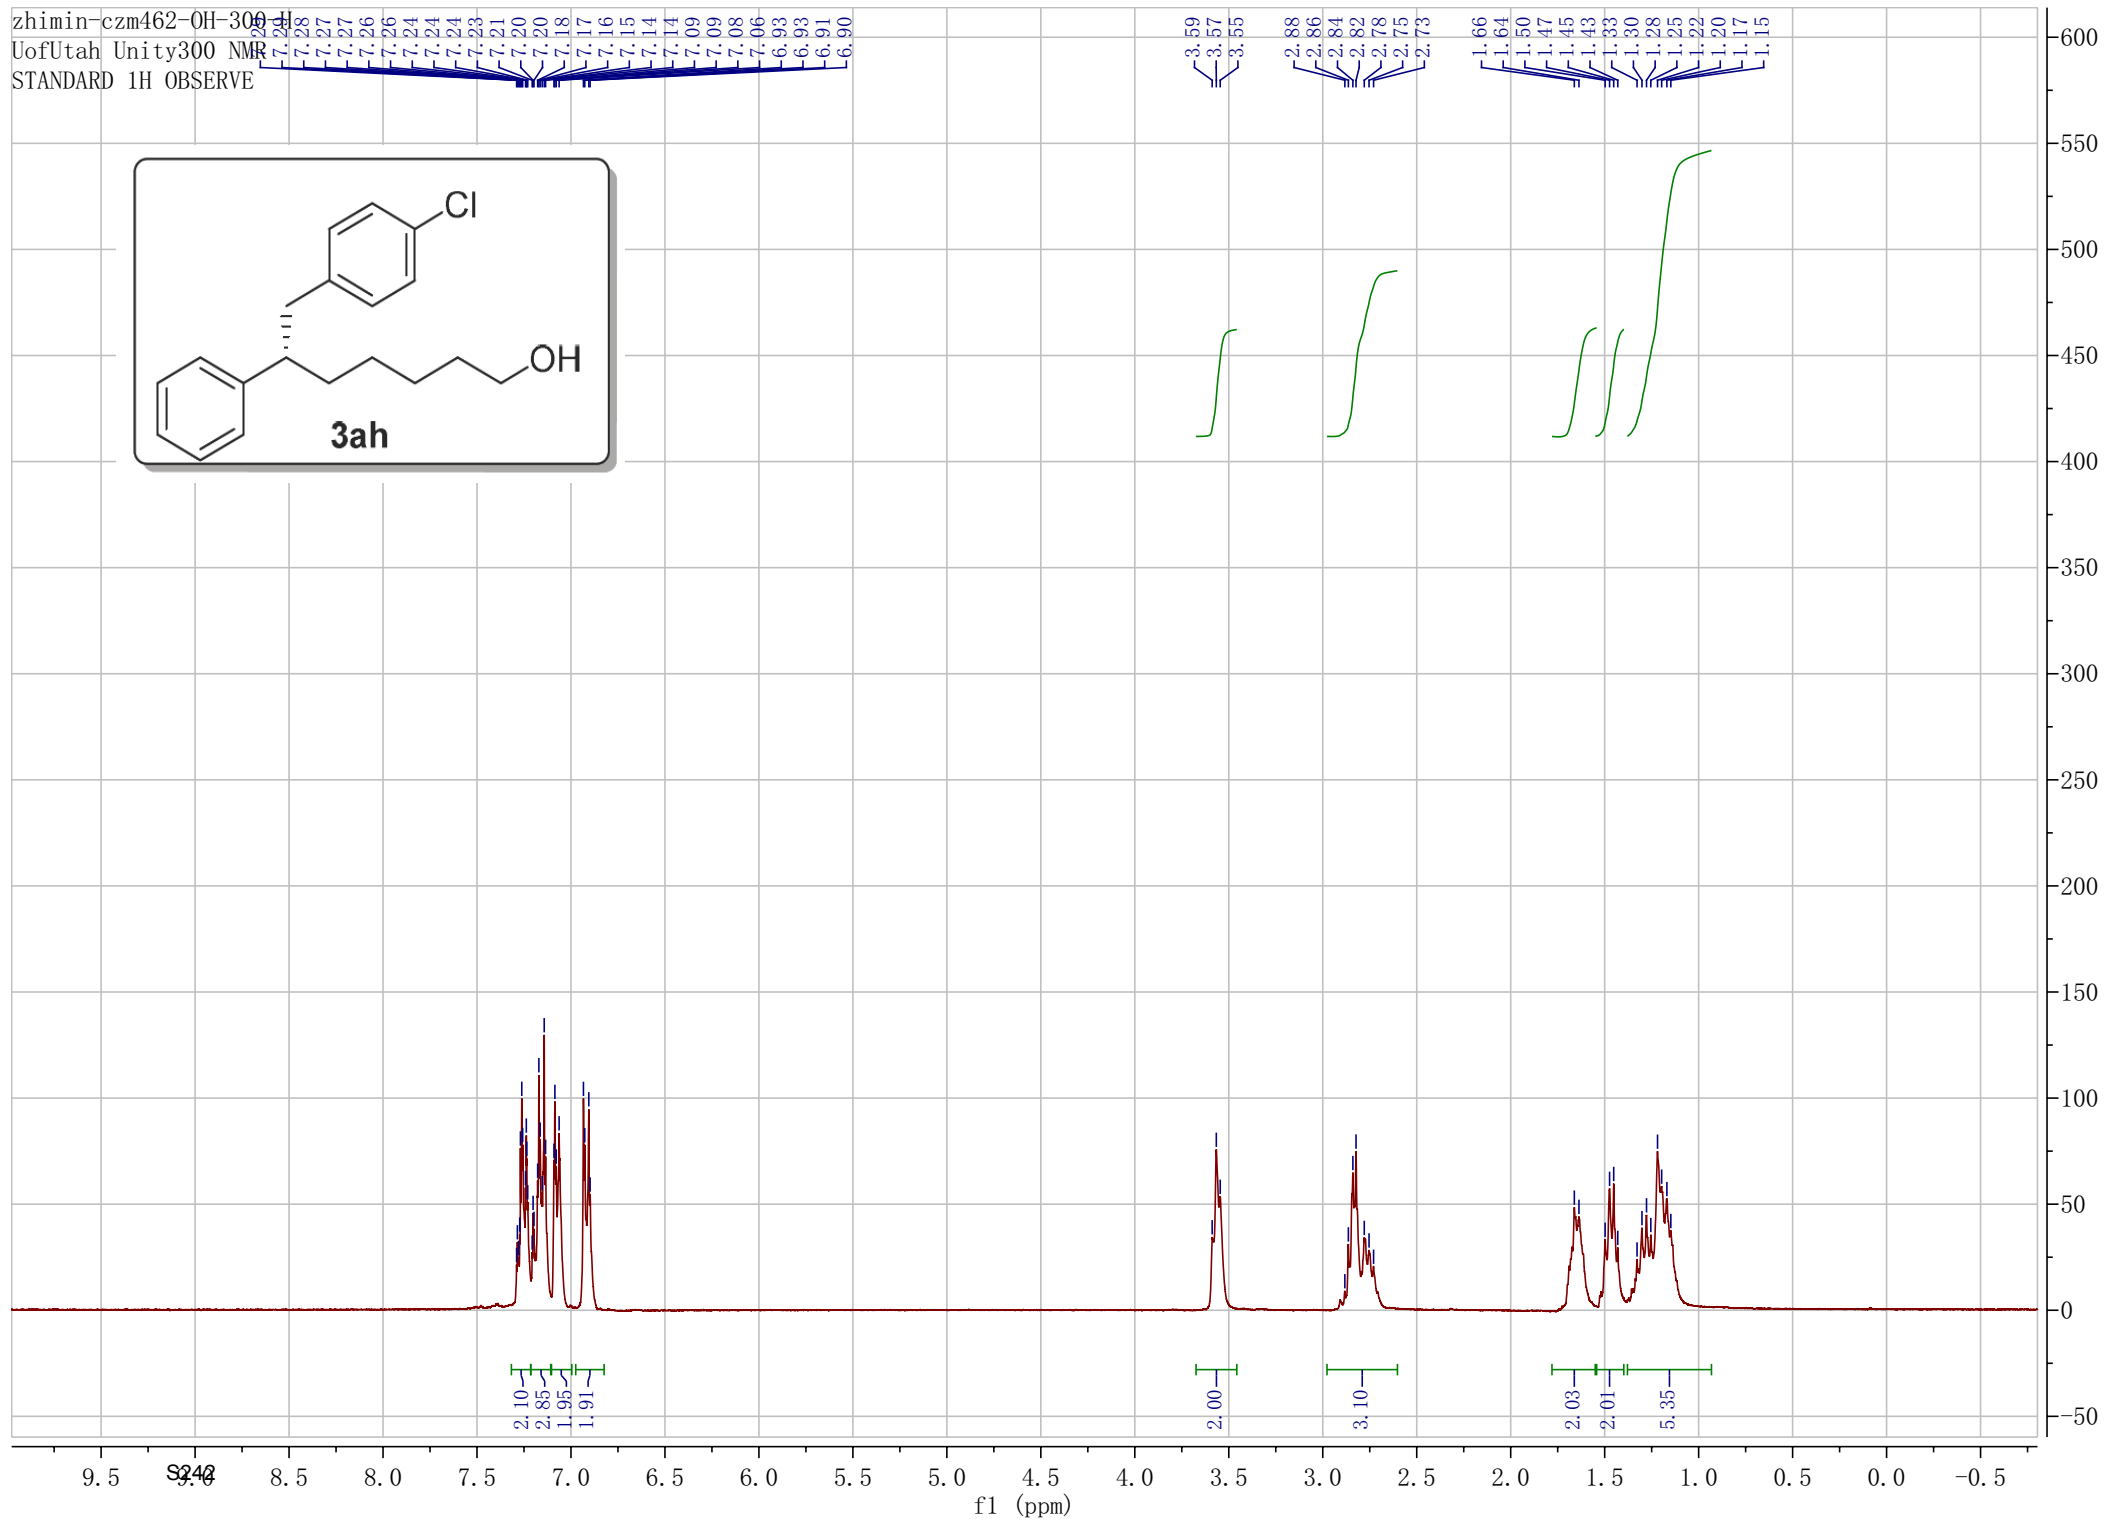



zhimin-czm462-OH-300-C  
13C OBSERVE

144.54  
139.09  
131.42  
130.40  
128.24  
128.07  
127.67  
126.12

77.42  
77.00  
76.58

62.87

47.95

43.16

35.50

32.56

27.26

25.67

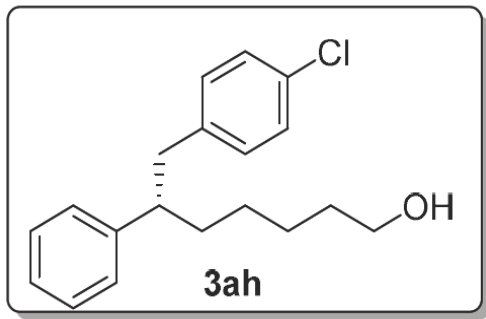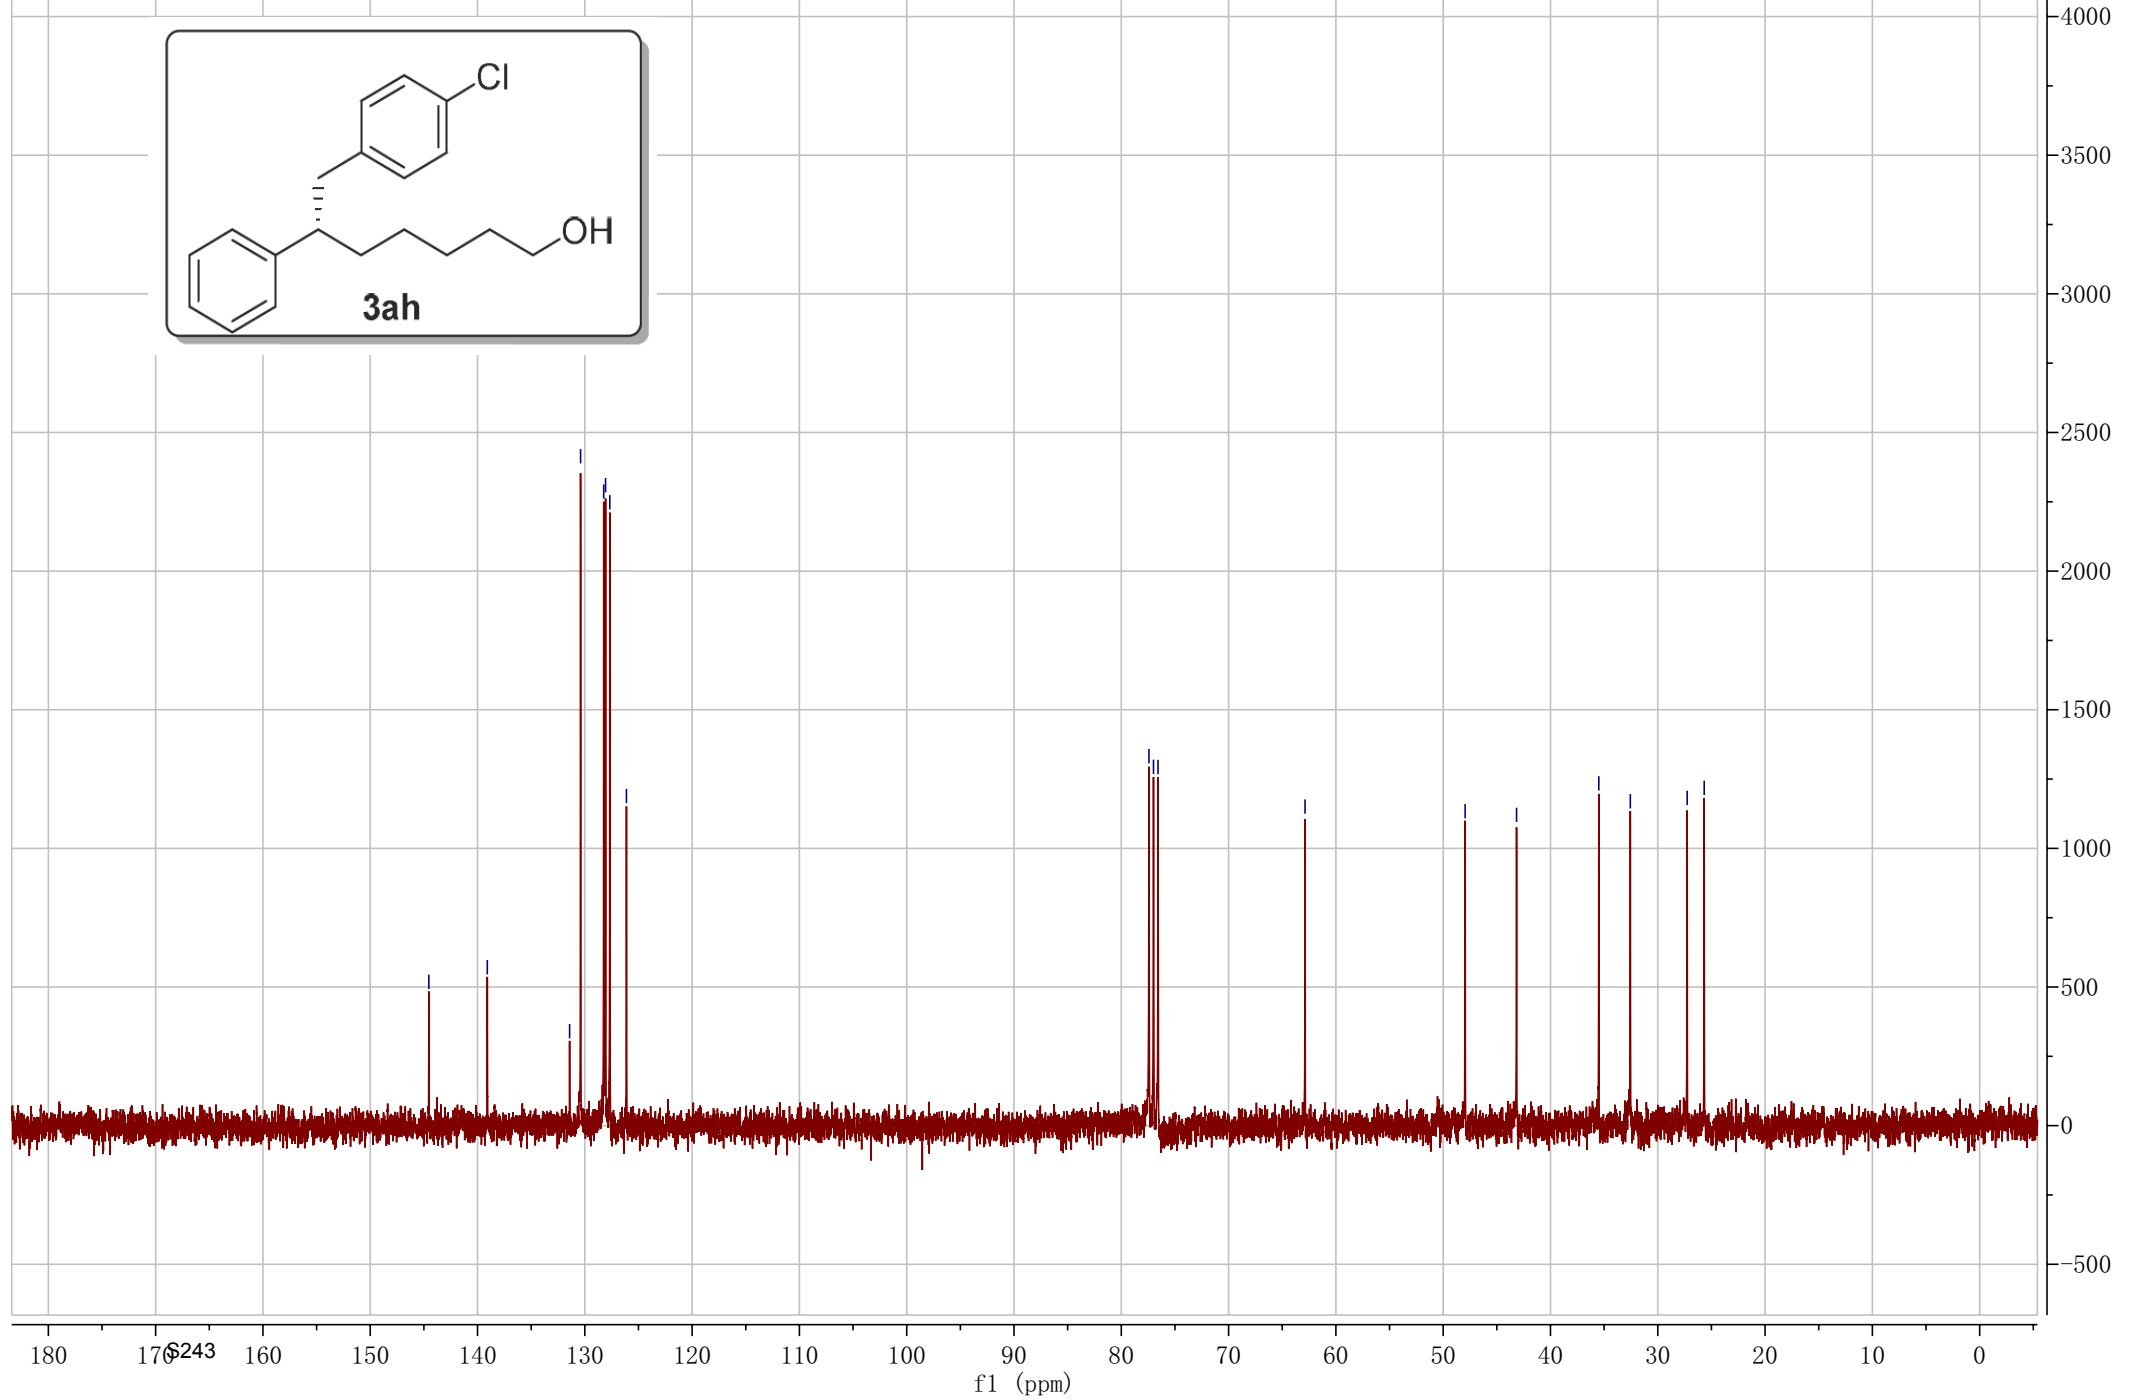

## Cartesian coordinates for optimized structures:

### Substrates

#### 1a

|   |             |             |             |
|---|-------------|-------------|-------------|
| C | 2.07779900  | -1.24607500 | -0.34540300 |
| C | 0.72515200  | -0.94310900 | -0.42311400 |
| C | 0.25325700  | 0.32926600  | -0.10712300 |
| C | 1.18707700  | 1.27697200  | 0.32125200  |
| C | 2.53287300  | 0.97006200  | 0.40156400  |
| C | 3.00596000  | -0.29706900 | 0.06329400  |
| H | 2.41506500  | -2.24237600 | -0.60642200 |
| H | 0.03599800  | -1.71194500 | -0.74649700 |
| H | 0.84623000  | 2.25935700  | 0.62215800  |
| H | 3.23242000  | 1.72334500  | 0.74635100  |
| C | -1.19052900 | 0.66702100  | -0.20709300 |
| C | -1.58573800 | 1.90363000  | -0.50606900 |
| H | -0.87020200 | 2.68594100  | -0.72163800 |
| H | -2.63036200 | 2.17666100  | -0.56513700 |
| C | -2.16073400 | -0.45970600 | 0.03939900  |
| H | -2.06285100 | -1.20981600 | -0.75068600 |
| H | -1.89371600 | -0.96903600 | 0.96968300  |
| C | -3.61753600 | -0.05773200 | 0.11285900  |
| H | -3.93674400 | 0.38453600  | -0.83721500 |
| H | -3.76076000 | 0.68944100  | 0.90165300  |
| O | -4.35727400 | -1.23421800 | 0.38917500  |
| H | -5.29081900 | -1.01423000 | 0.43304600  |
| C | 4.47315200  | -0.61405100 | 0.14284300  |
| H | 5.03052200  | -0.06545000 | -0.61914900 |
| H | 4.88303200  | -0.33082200 | 1.11335100  |
| H | 4.65597900  | -1.67712300 | -0.00735100 |

#### 1p

|   |             |             |             |
|---|-------------|-------------|-------------|
| C | -2.46121200 | -1.48034700 | 0.29316200  |
| C | -1.13352200 | -1.09137900 | 0.39818500  |
| C | -0.74057900 | 0.21147300  | 0.08864300  |
| C | -1.71749200 | 1.10342500  | -0.35934300 |
| C | -3.04300000 | 0.71576200  | -0.46844000 |
| C | -3.42240800 | -0.57839300 | -0.13779800 |
| H | -2.74357300 | -2.49353400 | 0.54881800  |
| H | -0.40049400 | -1.81065000 | 0.73828300  |
| H | -1.42668600 | 2.10476700  | -0.64977800 |
| H | -3.78102100 | 1.42321400  | -0.82423900 |
| H | -4.45703900 | -0.88318000 | -0.22540300 |
| C | 0.67753600  | 0.63929600  | 0.21927200  |
| C | 0.98346300  | 1.88976900  | 0.56090800  |
| H | 0.21262500  | 2.61411000  | 0.78848100  |
| H | 2.00614600  | 2.23106600  | 0.64456300  |
| C | 1.72266200  | -0.41283200 | -0.04879000 |
| H | 1.66427100  | -1.19424200 | 0.71428400  |
| H | 1.50190500  | -0.90665600 | -0.99936500 |
| C | 3.15034600  | 0.08679100  | -0.08649700 |
| H | 3.42627600  | 0.51723800  | 0.88241200  |
| H | 3.25392200  | 0.86789500  | -0.84820700 |
| O | 3.97016400  | -1.02819100 | -0.38930000 |
| H | 4.88759500  | -0.74589500 | -0.41126500 |

## 1q

|   |             |             |             |
|---|-------------|-------------|-------------|
| C | -1.60849100 | -1.32842800 | 0.43121100  |
| C | -0.27088500 | -0.99221300 | 0.47705600  |
| C | 0.17009500  | 0.29677200  | 0.15691200  |
| C | -0.79154800 | 1.21996600  | -0.24189200 |
| C | -2.14144600 | 0.89900700  | -0.29849000 |
| C | -2.55690800 | -0.38293500 | 0.04595600  |
| H | -1.94701600 | -2.32289400 | 0.68974300  |
| H | 0.44147000  | -1.74742400 | 0.78166600  |
| H | -0.48015100 | 2.21212900  | -0.54284200 |
| H | -2.84952800 | 1.64740100  | -0.62330700 |
| C | 1.60708900  | 0.66491100  | 0.22674900  |
| C | 1.98520500  | 1.90385900  | 0.53893100  |
| H | 1.25967000  | 2.66493800  | 0.79399300  |
| H | 3.02483700  | 2.19959200  | 0.56867600  |
| C | 2.59352700  | -0.43530500 | -0.07104700 |
| H | 2.53033300  | -1.20613000 | 0.70254400  |
| H | 2.31365900  | -0.92768200 | -1.00671300 |
| C | 4.03992600  | -0.00241800 | -0.16950700 |
| H | 4.37240800  | 0.42568900  | 0.78249100  |
| H | 4.14968100  | 0.76435200  | -0.94473700 |
| O | 4.79628500  | -1.15731500 | -0.48895900 |
| H | 5.72417900  | -0.91773800 | -0.54738100 |
| O | -3.84613900 | -0.80270600 | 0.02548200  |
| C | -4.83260000 | 0.12706500  | -0.35887500 |
| H | -4.67167900 | 0.47468400  | -1.38302100 |
| H | -5.78323300 | -0.39607900 | -0.30083500 |
| H | -4.84958900 | 0.98764000  | 0.31551700  |

## 1r

|    |             |             |             |
|----|-------------|-------------|-------------|
| C  | -1.71720800 | -1.13802900 | 0.39492800  |
| C  | -0.35851100 | -0.86989100 | 0.45888700  |
| C  | 0.15149700  | 0.38413900  | 0.12132600  |
| C  | -0.74923500 | 1.35793300  | -0.31510600 |
| C  | -2.10801200 | 1.10480000  | -0.38793400 |
| C  | -2.58540200 | -0.14537800 | -0.02611000 |
| H  | -2.10319400 | -2.11028300 | 0.66838700  |
| H  | 0.30711800  | -1.65506700 | 0.79094400  |
| H  | -0.37753500 | 2.32451400  | -0.62904300 |
| H  | -2.79605900 | 1.86357500  | -0.73432300 |
| C  | 1.60646300  | 0.67377000  | 0.20945100  |
| C  | 2.04162600  | 1.89817900  | 0.50157000  |
| H  | 1.35307100  | 2.70350800  | 0.72041100  |
| H  | 3.09470600  | 2.13796300  | 0.55282200  |
| C  | 2.53618500  | -0.48548400 | -0.04065300 |
| H  | 2.42278000  | -1.22813400 | 0.75448500  |
| H  | 2.24393000  | -0.99048000 | -0.96576300 |
| C  | 4.00460600  | -0.13111600 | -0.13081300 |
| H  | 4.34770000  | 0.30426900  | 0.81411600  |
| H  | 4.16348300  | 0.60784700  | -0.92434000 |
| O  | 4.70061700  | -1.33252500 | -0.40942000 |
| H  | 5.64087300  | -1.14568800 | -0.46365900 |
| Cl | -4.28434500 | -0.47325600 | -0.11893900 |

## 1s

|   |             |             |            |
|---|-------------|-------------|------------|
| C | -2.10310300 | -1.28048300 | 0.35412100 |
| C | -0.75656500 | -0.95781200 | 0.43269600 |
| C | -0.29432100 | 0.31855800  | 0.10859900 |

|   |             |             |             |
|---|-------------|-------------|-------------|
| C | -1.22735100 | 1.26055600  | -0.33093100 |
| C | -2.57538100 | 0.95671500  | -0.41940400 |
| C | -2.99129000 | -0.31299200 | -0.06835800 |
| H | -2.46789900 | -2.26483200 | 0.61345100  |
| H | -0.06183000 | -1.71680700 | 0.76575400  |
| H | -0.88789600 | 2.24232200  | -0.63377400 |
| H | -3.30068600 | 1.67969600  | -0.76675100 |
| C | 1.14701200  | 0.66623600  | 0.21511400  |
| C | 1.53029300  | 1.90284000  | 0.52790100  |
| H | 0.80788100  | 2.67624000  | 0.75290700  |
| H | 2.57234300  | 2.18461300  | 0.58969800  |
| C | 2.12566900  | -0.45017100 | -0.04345400 |
| H | 2.03442400  | -1.20991300 | 0.73831700  |
| H | 1.86338000  | -0.95122900 | -0.97960500 |
| C | 3.57950600  | -0.03592800 | -0.11161100 |
| H | 3.89437400  | 0.39901100  | 0.84327300  |
| H | 3.71721400  | 0.72036800  | -0.89264800 |
| O | 4.32684900  | -1.20414100 | -0.39929700 |
| H | 5.25917200  | -0.97835100 | -0.44060300 |
| F | -4.29467600 | -0.61701200 | -0.15374200 |

## 1t

|   |             |             |             |
|---|-------------|-------------|-------------|
| C | 1.08160400  | -0.87318000 | -0.33514400 |
| C | -0.29501100 | -0.74069700 | -0.41533400 |
| C | -0.91764000 | 0.47998000  | -0.14791300 |
| C | -0.11652400 | 1.56033600  | 0.23429100  |
| C | 1.25653100  | 1.43303600  | 0.31935400  |
| C | 1.86451900  | 0.21534800  | 0.03019600  |
| H | 1.55210300  | -1.82113100 | -0.55538300 |
| H | -0.88733400 | -1.59855600 | -0.70285500 |
| H | -0.58293800 | 2.50187400  | 0.49236900  |
| H | 1.87806900  | 2.26594600  | 0.62048600  |
| C | -2.39278200 | 0.62717500  | -0.25331700 |
| C | -2.93345900 | 1.78471000  | -0.62969800 |
| H | -2.31742800 | 2.63205800  | -0.89982900 |
| H | -4.00334000 | 1.92372800  | -0.70245700 |
| C | -3.21499800 | -0.59215900 | 0.07524700  |
| H | -3.03199100 | -1.37311200 | -0.66832200 |
| H | -2.88212100 | -1.00550400 | 1.03156300  |
| C | -4.70950100 | -0.36490800 | 0.14459100  |
| H | -5.08649800 | -0.02823400 | -0.82741800 |
| H | -4.93663700 | 0.41017600  | 0.88535200  |
| O | -5.29665900 | -1.60135600 | 0.50737300  |
| H | -6.25026300 | -1.49667000 | 0.54768900  |
| C | 3.34569000  | 0.12920800  | 0.13854600  |
| O | 4.05687400  | 1.04458500  | 0.45775400  |
| O | 3.81597200  | -1.08951100 | -0.16097400 |
| C | 5.23146900  | -1.22924000 | -0.07501800 |
| H | 5.44587700  | -2.25915400 | -0.34342700 |
| H | 5.72178100  | -0.54215300 | -0.76318300 |
| H | 5.57182700  | -1.01666600 | 0.93738200  |

## 1u

|   |             |             |             |
|---|-------------|-------------|-------------|
| C | 1.38662200  | 1.97990300  | 0.36137500  |
| C | 0.11599300  | 1.44028600  | 0.43050300  |
| C | -0.07293100 | 0.06491500  | 0.25296300  |
| C | 1.03338700  | -0.72893600 | -0.01866000 |
| C | 2.31145900  | -0.18103300 | -0.09061900 |
| C | 2.49679400  | 1.18359300  | 0.10289300  |
| H | 1.52562300  | 3.04301800  | 0.51076800  |

|   |             |             |             |
|---|-------------|-------------|-------------|
| H | -0.72594300 | 2.08567700  | 0.63730000  |
| H | 0.92351500  | -1.78873900 | -0.20659500 |
| H | 3.47779700  | 1.63165300  | 0.04731800  |
| C | -1.42828400 | -0.54166800 | 0.34382600  |
| C | -1.59395500 | -1.76623100 | 0.83978900  |
| H | -0.75540800 | -2.33459500 | 1.22001500  |
| H | -2.56548500 | -2.23730100 | 0.90088000  |
| C | -2.57342700 | 0.30575300  | -0.14698900 |
| H | -2.68030900 | 1.18753200  | 0.49097000  |
| H | -2.33807600 | 0.68652600  | -1.14490600 |
| C | -3.91616400 | -0.38936200 | -0.20049700 |
| H | -4.21291000 | -0.71584100 | 0.80233600  |
| H | -3.85457800 | -1.27521200 | -0.84275700 |
| O | -4.84615800 | 0.54660600  | -0.71675100 |
| H | -5.71474200 | 0.13889200  | -0.75076800 |
| O | 3.31245000  | -1.05565300 | -0.36574500 |
| C | 4.62160400  | -0.54438400 | -0.46285200 |
| H | 5.26350100  | -1.39189800 | -0.68772100 |
| H | 4.70022800  | 0.19373500  | -1.26577000 |
| H | 4.93987000  | -0.08809400 | 0.47851700  |

### 1v

|   |             |             |             |
|---|-------------|-------------|-------------|
| C | -2.20574100 | -1.86618200 | 0.24081800  |
| C | -0.91605400 | -1.38110100 | 0.38560700  |
| C | -0.60109200 | -0.03425200 | 0.18303900  |
| C | -1.66029500 | 0.78748500  | -0.19940900 |
| C | -2.95292100 | 0.32881700  | -0.36126400 |
| C | -3.23036100 | -1.00921400 | -0.13306400 |
| H | -2.40818500 | -2.91377100 | 0.41803900  |
| H | -0.12878400 | -2.06382800 | 0.67469700  |
| H | -3.71727900 | 1.02964900  | -0.66837000 |
| H | -4.24018800 | -1.37798800 | -0.25327900 |
| C | 0.79004100  | 0.46294500  | 0.34533500  |
| C | 1.04601800  | 1.67465000  | 0.83345800  |
| H | 0.25413300  | 2.34444400  | 1.13440000  |
| H | 2.05852800  | 2.03501300  | 0.95483200  |
| C | 1.87866600  | -0.49822000 | -0.06331800 |
| H | 1.88619900  | -1.36374600 | 0.60506000  |
| H | 1.65642400  | -0.89096400 | -1.05956800 |
| C | 3.27750200  | 0.07914200  | -0.07903400 |
| H | 3.56400900  | 0.40706700  | 0.92614600  |
| H | 3.31628700  | 0.94814800  | -0.74538600 |
| O | 4.14057100  | -0.94833200 | -0.53303900 |
| H | 5.04158300  | -0.61691400 | -0.54804700 |
| F | -1.44020800 | 2.08723700  | -0.45413600 |

### 1w

|   |             |             |             |
|---|-------------|-------------|-------------|
| C | -1.74479900 | -0.61588400 | 0.21746400  |
| C | -0.38380800 | -0.59256200 | 0.36921100  |
| C | 0.28093100  | 0.61916800  | 0.10037600  |
| C | -0.45398200 | 1.72288400  | -0.32583800 |
| C | -1.84321300 | 1.68479500  | -0.47616700 |
| C | -2.46360900 | 0.49518400  | -0.19379700 |
| H | 0.14405400  | -1.47475400 | 0.70142100  |
| H | 0.07250500  | 2.63384500  | -0.57600400 |
| H | -2.40304400 | 2.54705500  | -0.80948900 |
| C | 1.75626300  | 0.71326600  | 0.25706000  |
| C | 2.32688300  | 1.83524900  | 0.69262100  |
| H | 1.73063700  | 2.68920800  | 0.98578100  |
| H | 3.39923000  | 1.93751800  | 0.78754000  |

|   |             |             |             |
|---|-------------|-------------|-------------|
| C | 2.54571400  | -0.51889600 | -0.10351400 |
| H | 2.29871100  | -1.33145100 | 0.58589200  |
| H | 2.23967000  | -0.86547600 | -1.09473300 |
| C | 4.04943500  | -0.35176500 | -0.09434500 |
| H | 4.39252400  | -0.07433500 | 0.90840600  |
| H | 4.34211200  | 0.44520400  | -0.78724300 |
| O | 4.60547900  | -1.59406300 | -0.48753300 |
| H | 5.56309600  | -1.52499400 | -0.48108400 |
| O | -3.79534800 | 0.18859900  | -0.22368400 |
| O | -2.61003600 | -1.64698200 | 0.46154500  |
| C | -3.85629000 | -1.22378500 | -0.07381500 |
| H | -4.00577600 | -1.68614900 | -1.05564800 |
| H | -4.65563700 | -1.48202300 | 0.61699800  |

## 1x

|    |             |             |             |
|----|-------------|-------------|-------------|
| C  | -1.40381300 | 0.77717200  | -0.14124400 |
| C  | -0.03799500 | 0.61521800  | -0.25522200 |
| C  | 0.55098700  | -0.64700900 | -0.15368400 |
| C  | -0.28667600 | -1.72902600 | 0.09816900  |
| C  | -1.65952700 | -1.57431900 | 0.21844600  |
| C  | -2.24249600 | -0.31705000 | 0.09492000  |
| H  | 0.56177100  | 1.49562600  | -0.43940500 |
| H  | 0.14098900  | -2.71408700 | 0.23032200  |
| H  | -2.27281600 | -2.43964100 | 0.42336500  |
| C  | 2.01903800  | -0.82195200 | -0.29724000 |
| C  | 2.52683000  | -1.94289300 | -0.80718100 |
| H  | 1.88696800  | -2.73615800 | -1.17039300 |
| H  | 3.59223700  | -2.10347000 | -0.89756800 |
| C  | 2.87790200  | 0.32906000  | 0.15921500  |
| H  | 2.70093300  | 1.19816100  | -0.48117400 |
| H  | 2.57255700  | 0.63170200  | 1.16490800  |
| C  | 4.36749700  | 0.06293700  | 0.16878100  |
| H  | 4.71717600  | -0.16600100 | -0.84388100 |
| H  | 4.59019200  | -0.79811500 | 0.80915600  |
| O  | 4.99203800  | 1.23513500  | 0.66051000  |
| H  | 5.94356700  | 1.10687000  | 0.66227400  |
| O  | -3.56372100 | -0.07055500 | 0.19790900  |
| C  | -4.42144800 | -1.16497300 | 0.43449800  |
| H  | -4.18933500 | -1.64972800 | 1.38630300  |
| H  | -5.42691600 | -0.75568000 | 0.47223700  |
| H  | -4.35617900 | -1.89894900 | -0.37285900 |
| Cl | -2.09585100 | 2.35234300  | -0.28984600 |

## 1y

|   |             |             |             |
|---|-------------|-------------|-------------|
| C | -1.38815300 | -0.94379900 | 0.31714400  |
| C | -0.01917900 | -0.73621700 | 0.42172500  |
| C | 0.56470900  | 0.46028400  | 0.01025900  |
| C | -0.27501000 | 1.43112800  | -0.54132300 |
| C | -1.63746800 | 1.21936700  | -0.64684800 |
| C | -2.22449900 | 0.03040100  | -0.21546500 |
| H | -1.79956700 | -1.88686500 | 0.65374200  |
| H | 0.59530600  | -1.52175600 | 0.84136200  |
| H | 0.15265500  | 2.35067600  | -0.92001800 |
| H | -2.26352800 | 1.98698500  | -1.08918100 |
| C | 2.02695200  | 0.69338100  | 0.13645400  |
| C | 2.50974300  | 1.91826000  | 0.33976000  |
| H | 1.85198800  | 2.76932100  | 0.45631600  |
| H | 3.57033200  | 2.11495500  | 0.41549800  |
| C | 2.91128100  | -0.52234300 | 0.02910000  |
| H | 2.72481600  | -1.18958500 | 0.87552400  |

|   |             |             |             |
|---|-------------|-------------|-------------|
| H | 2.63742900  | -1.09001100 | -0.86472500 |
| C | 4.39744400  | -0.24214300 | -0.01589600 |
| H | 4.71630100  | 0.25772200  | 0.90533000  |
| H | 4.62910000  | 0.41799600  | -0.85944200 |
| O | 5.04959400  | -1.49213000 | -0.15712100 |
| H | 5.99893900  | -1.34986000 | -0.17519500 |
| C | -3.72631900 | -0.13771400 | -0.30354100 |
| H | -4.05454700 | 0.40691300  | -1.19408600 |
| C | -4.17433300 | -1.58881600 | -0.44819600 |
| H | -5.24693900 | -1.63196000 | -0.64107900 |
| H | -3.65690600 | -2.08820000 | -1.26815800 |
| H | -3.98693800 | -2.15338000 | 0.46727700  |
| C | -4.39546600 | 0.50887400  | 0.91384500  |
| H | -4.12402400 | 1.56136300  | 1.00111100  |
| H | -5.48222900 | 0.43585300  | 0.84255500  |
| H | -4.07715600 | 0.00289500  | 1.82803900  |

## 1z

|   |             |             |             |
|---|-------------|-------------|-------------|
| C | 1.03933700  | -1.03214700 | -0.41885900 |
| C | -0.33138900 | -0.80549900 | -0.46719700 |
| C | -0.87369600 | 0.43031100  | -0.12909100 |
| C | 0.01399200  | 1.42479000  | 0.29133300  |
| C | 1.37512100  | 1.19461000  | 0.34212500  |
| C | 1.92543500  | -0.03923200 | -0.01694500 |
| H | 1.40612700  | -2.00855900 | -0.70329700 |
| H | -0.97779900 | -1.61144300 | -0.78877500 |
| H | -0.37384200 | 2.38439500  | 0.60861200  |
| H | 2.02324600  | 1.99350800  | 0.68192700  |
| C | -2.33610100 | 0.68367400  | -0.19918100 |
| C | -2.80910400 | 1.90027000  | -0.46562700 |
| H | -2.14534900 | 2.72848000  | -0.67515500 |
| H | -3.86895900 | 2.11128700  | -0.50330100 |
| C | -3.23358000 | -0.50363900 | 0.03812000  |
| H | -3.10056200 | -1.23231000 | -0.76672000 |
| H | -2.92450000 | -1.01227100 | 0.95569900  |
| C | -4.71087500 | -0.19188800 | 0.13589000  |
| H | -5.06802600 | 0.24713600  | -0.80212500 |
| H | -4.88908300 | 0.53097600  | 0.94005000  |
| O | -5.37489100 | -1.41570500 | 0.39882700  |
| H | -6.31955300 | -1.25360900 | 0.45502700  |
| C | 3.43613100  | -0.24746100 | 0.05656800  |
| C | 3.84647500  | -1.65364900 | -0.37969900 |
| H | 4.93127900  | -1.75170200 | -0.31477600 |
| H | 3.40319300  | -2.41802200 | 0.26104900  |
| H | 3.55365300  | -1.85471200 | -1.41180600 |
| C | 4.13368600  | 0.76588000  | -0.86164000 |
| H | 3.91203400  | 1.79217900  | -0.56741900 |
| H | 5.21631200  | 0.62874600  | -0.81720700 |
| H | 3.81177600  | 0.63405900  | -1.89607700 |
| C | 3.90964500  | -0.03249400 | 1.50101200  |
| H | 4.98999700  | -0.17869700 | 1.56694100  |
| H | 3.68439300  | 0.97541900  | 1.85075300  |
| H | 3.42432200  | -0.74037000 | 2.17513000  |

## 1ac

|   |             |             |             |
|---|-------------|-------------|-------------|
| C | -1.89539400 | 2.04075800  | -0.37523500 |
| H | -1.48958500 | 3.04508900  | -0.37782100 |
| H | -2.81252900 | 1.88633400  | -0.92883800 |
| C | -1.78604200 | -0.35465200 | 0.33950000  |
| H | -1.01040100 | -1.02375400 | -0.04634400 |

|   |             |             |             |
|---|-------------|-------------|-------------|
| H | -1.92787900 | -0.64080400 | 1.38749700  |
| C | -3.07203700 | -0.62270900 | -0.40954200 |
| H | -2.93933700 | -0.39228400 | -1.47267500 |
| H | -3.87383600 | 0.01555900  | -0.02100900 |
| O | -3.38652300 | -1.99194200 | -0.22583600 |
| H | -4.19288400 | -2.19527300 | -0.70567000 |
| C | -1.28615500 | 1.06138600  | 0.28411200  |
| C | -0.00214500 | 1.30972100  | 1.03976400  |
| H | 0.22379600  | 2.37777200  | 1.02209600  |
| H | -0.13857800 | 1.02227300  | 2.08600900  |
| C | 1.16421500  | 0.53465600  | 0.46758500  |
| C | 1.81682600  | -0.44406000 | 1.20780500  |
| C | 1.59292000  | 0.78527400  | -0.83417300 |
| C | 2.87964500  | -1.15598100 | 0.66503100  |
| H | 1.48922400  | -0.65223100 | 2.21987700  |
| C | 2.65372700  | 0.07939200  | -1.37919100 |
| H | 1.08032700  | 1.53833500  | -1.42246500 |
| C | 3.30143600  | -0.89538500 | -0.62958700 |
| H | 3.37614800  | -1.91539200 | 1.25540000  |
| H | 2.97685600  | 0.28786600  | -2.39114700 |
| H | 4.12888300  | -1.44836100 | -1.05463100 |

## 1ad

|   |             |             |             |
|---|-------------|-------------|-------------|
| C | 1.07969500  | -1.73064300 | 0.76697600  |
| H | 0.27643900  | -2.39293900 | 1.05962200  |
| H | 2.07844100  | -2.04298500 | 1.04246900  |
| C | 1.95708300  | 0.32187800  | -0.33712100 |
| H | 1.93942200  | 0.39264900  | -1.42978600 |
| H | 1.76197400  | 1.33515000  | 0.02581300  |
| C | 3.35487600  | -0.06592800 | 0.09099200  |
| H | 3.61392000  | -1.04992000 | -0.31524400 |
| H | 3.40947700  | -0.12429100 | 1.18393500  |
| O | 4.23464600  | 0.92864100  | -0.40558600 |
| H | 5.13443800  | 0.70117800  | -0.15983200 |
| C | 0.85126700  | -0.60034000 | 0.10563700  |
| C | -0.53935400 | -0.12934700 | -0.26261600 |
| C | -1.59851600 | -1.23065500 | -0.29835200 |
| C | -1.00914100 | 0.99760200  | 0.67376500  |
| H | -0.47483900 | 0.29867400  | -1.27274300 |
| C | -2.94942100 | -0.68233400 | -0.75277300 |
| H | -1.71432000 | -1.65304700 | 0.70531800  |
| H | -1.26973700 | -2.04260200 | -0.95079100 |
| C | -2.36573800 | 1.55230900  | 0.24428800  |
| H | -1.08060400 | 0.58828500  | 1.68746300  |
| H | -0.27197500 | 1.80161000  | 0.70710600  |
| C | -3.41679400 | 0.44886900  | 0.15964700  |
| H | -3.69095700 | -1.48339200 | -0.77440300 |
| H | -2.86031900 | -0.30631100 | -1.77766100 |
| H | -2.68725100 | 2.33164300  | 0.93821900  |
| H | -2.26239900 | 2.02634900  | -0.73772500 |
| H | -4.36697700 | 0.85529200  | -0.19259500 |
| H | -3.59564700 | 0.04706200  | 1.16286300  |

## 1ae

|   |             |             |             |
|---|-------------|-------------|-------------|
| C | -1.28767100 | 1.40595300  | 0.00002000  |
| H | -2.28836600 | 1.81989100  | -0.00000600 |
| H | -0.46952300 | 2.11439900  | 0.00005400  |
| C | 0.26495400  | -0.55170000 | 0.00007200  |
| H | 0.34939900  | -1.20879000 | 0.87202500  |
| H | 0.34938400  | -1.20897300 | -0.87174400 |



|   |             |             |             |
|---|-------------|-------------|-------------|
| C | 1.44286400  | 0.39661200  | -0.00004200 |
| H | 1.40628400  | 1.03931500  | 0.88672100  |
| H | 1.40623500  | 1.03913300  | -0.88692900 |
| O | 2.61831300  | -0.39517900 | 0.00002000  |
| H | 3.38493900  | 0.18278600  | -0.00022700 |
| C | -1.09396100 | 0.09186700  | 0.00001600  |
| C | -2.24171400 | -0.87647800 | -0.00004400 |
| H | -2.19531000 | -1.52617600 | -0.87755800 |
| H | -2.19542500 | -1.52616100 | 0.87748900  |
| H | -3.20094400 | -0.36151100 | -0.00011500 |

## 1af

|   |             |             |             |
|---|-------------|-------------|-------------|
| C | 1.62884700  | -1.08425300 | -0.44742500 |
| C | 1.27341000  | 0.22007100  | -0.10021900 |
| C | 2.26570700  | 1.05397200  | 0.42000500  |
| C | 3.56994800  | 0.60933400  | 0.56505900  |
| H | 2.00120700  | 2.05492900  | 0.73607700  |
| H | 4.31994500  | 1.27268800  | 0.97648600  |
| C | -0.12034200 | 0.71173700  | -0.26527100 |
| C | -0.35964200 | 1.97565000  | -0.60681600 |
| H | 0.45073000  | 2.66324800  | -0.81050400 |
| H | -1.36438000 | 2.36061500  | -0.71203700 |
| C | -1.22103400 | -0.29413100 | -0.02737400 |
| H | -1.14809700 | -1.07839400 | -0.78847200 |
| H | -1.02215200 | -0.79538000 | 0.92632400  |
| H | 0.88424000  | -1.75873100 | -0.84888500 |
| C | 2.93513200  | -1.53024000 | -0.30664500 |
| H | 3.18902100  | -2.54265300 | -0.59357200 |
| C | 3.91219000  | -0.68532200 | 0.19823900  |
| H | 4.92989300  | -1.03463300 | 0.31351400  |
| C | -2.63549500 | 0.26325100  | -0.03265200 |
| H | -2.87421400 | 0.69650600  | -1.00652900 |
| H | -2.73477000 | 1.06003000  | 0.70813400  |
| C | -3.65756600 | -0.81110300 | 0.27327600  |
| H | -3.46032200 | -1.24020900 | 1.26319000  |
| H | -3.57892000 | -1.61981300 | -0.46387800 |
| O | -4.94188800 | -0.21642200 | 0.23034000  |
| H | -5.60400700 | -0.88061600 | 0.43636100  |

## 1ag

|   |             |             |             |
|---|-------------|-------------|-------------|
| C | 2.09696300  | -1.09423700 | -0.48123300 |
| C | 1.82074300  | 0.21701900  | -0.09101300 |
| C | 2.85367700  | 0.96267400  | 0.48145700  |
| C | 4.12219600  | 0.42702500  | 0.63527600  |
| H | 2.64873800  | 1.96637200  | 0.83130800  |
| H | 4.90476100  | 1.02284900  | 1.08737900  |
| C | 0.46629600  | 0.80602300  | -0.26575100 |
| C | 0.32018800  | 2.09624200  | -0.55942300 |
| H | 1.17867700  | 2.73606000  | -0.71637200 |
| H | -0.65378300 | 2.55197000  | -0.67084700 |
| C | -0.70324500 | -0.13300900 | -0.09435700 |
| H | -0.66465100 | -0.89098900 | -0.88373700 |
| H | -0.56559600 | -0.68414100 | 0.84206800  |
| H | 1.31852400  | -1.70243300 | -0.92227900 |
| C | 3.36754300  | -1.63118500 | -0.33169000 |
| H | 3.56037300  | -2.64698600 | -0.65214000 |
| C | 4.38650900  | -0.87281400 | 0.22508600  |
| H | 5.37610800  | -1.29332500 | 0.34713500  |
| C | -2.08269300 | 0.50821000  | -0.10915200 |
| H | -2.24514000 | 1.00790000  | -1.06886500 |

|   |             |             |             |
|---|-------------|-------------|-------------|
| H | -2.13259500 | 1.28425600  | 0.66080100  |
| C | -3.18726300 | -0.51525100 | 0.12165500  |
| H | -3.04706100 | -1.01279500 | 1.08488400  |
| H | -3.14897400 | -1.29335300 | -0.64549500 |
| C | -4.56445500 | 0.11193500  | 0.10075100  |
| H | -4.73503200 | 0.59831200  | -0.86756200 |
| H | -4.63182100 | 0.88241500  | 0.87860800  |
| O | -5.51786200 | -0.91164100 | 0.32343600  |
| H | -6.39839200 | -0.52876700 | 0.31799000  |

## 1ah

|   |             |             |             |
|---|-------------|-------------|-------------|
| C | 2.64523700  | -1.09980500 | -0.48880500 |
| C | 2.38179800  | 0.21021800  | -0.08574500 |
| C | 3.41610800  | 0.93285500  | 0.51309000  |
| C | 4.67394800  | 0.37640100  | 0.68040300  |
| H | 3.22011100  | 1.93500200  | 0.87240100  |
| H | 5.45764900  | 0.95463500  | 1.15292300  |
| C | 1.03924400  | 0.82171300  | -0.27434400 |
| C | 0.91753800  | 2.11668600  | -0.55781100 |
| H | 1.78836300  | 2.74409300  | -0.69608000 |
| H | -0.04750300 | 2.58866200  | -0.67885200 |
| C | -0.14758300 | -0.10000800 | -0.12835600 |
| H | -0.10980700 | -0.85029500 | -0.92546100 |
| H | -0.02977300 | -0.66319800 | 0.80391800  |
| H | 1.86520100  | -1.69004400 | -0.95100400 |
| C | 3.90517200  | -1.65755400 | -0.32588600 |
| H | 4.08852600  | -2.67168900 | -0.65709200 |
| C | 4.92589100  | -0.92181500 | 0.25745700  |
| H | 5.90710500  | -1.35855600 | 0.38982200  |
| C | -1.51620000 | 0.56315000  | -0.15360800 |
| H | -1.66345200 | 1.07285600  | -1.11018500 |
| H | -1.56627500 | 1.33351500  | 0.62163400  |
| C | -2.64548100 | -0.43880300 | 0.05634200  |
| H | -2.50347200 | -0.94680200 | 1.01609400  |
| H | -2.58799300 | -1.21526600 | -0.71407500 |
| C | -4.02210200 | 0.21143600  | 0.02230400  |
| H | -4.18143600 | 0.70689600  | -0.93913300 |
| H | -4.09309800 | 0.98417900  | 0.79241100  |
| C | -5.13785100 | -0.78763700 | 0.23906700  |
| H | -5.09617800 | -1.56281200 | -0.53594800 |
| H | -5.01010000 | -1.27967200 | 1.211103800 |
| O | -6.37037300 | -0.09130200 | 0.18688800  |
| H | -7.08918300 | -0.71211600 | 0.32784100  |

## Ligands

### L1

|   |             |             |             |
|---|-------------|-------------|-------------|
| C | -0.34933100 | 0.35207300  | 0.24825700  |
| C | -1.12560700 | 1.43621400  | -0.14418300 |
| C | -2.49451200 | 1.25797200  | -0.26985700 |
| C | -3.01944900 | 0.00986100  | 0.00228000  |
| C | -2.15829400 | -1.01542000 | 0.38820900  |
| N | -0.85402500 | -0.85395400 | 0.50932500  |
| H | -3.13858000 | 2.07308100  | -0.57055600 |
| H | -0.66005100 | 2.38993100  | -0.34270500 |
| H | -2.55031100 | -2.00351500 | 0.60695700  |
| C | 3.00760100  | 1.68800100  | 0.31620900  |
| C | 3.27048300  | 0.21891800  | 0.72189400  |

|   |             |             |             |
|---|-------------|-------------|-------------|
| H | 3.52829700  | 1.99736200  | -0.58829800 |
| H | 3.22920100  | 2.39437400  | 1.11559300  |
| H | 3.71693300  | 0.16819500  | 1.71882900  |
| O | 1.59657100  | 1.73380700  | 0.05500300  |
| N | 1.92956300  | -0.37051300 | 0.78879800  |
| C | 4.18570400  | -0.58022700 | -0.22998200 |
| C | 1.11769100  | 0.50766800  | 0.39434600  |
| C | -4.48749800 | -0.27867100 | -0.12039400 |
| F | -4.73607600 | -1.14306400 | -1.11221100 |
| F | -5.19667500 | 0.82546000  | -0.36894300 |
| F | -4.97521600 | -0.82563500 | 0.99900800  |
| C | 5.56596200  | 0.07767900  | -0.25496700 |
| H | 6.24868100  | -0.50799500 | -0.87320300 |
| H | 5.53444200  | 1.08772100  | -0.66884500 |
| H | 5.98964000  | 0.13407000  | 0.75070100  |
| C | 4.31738600  | -2.00501000 | 0.30918900  |
| H | 4.75021000  | -2.00193800 | 1.31237600  |
| H | 3.34316600  | -2.48968200 | 0.36082900  |
| H | 4.97019600  | -2.59384600 | -0.33829000 |
| C | 3.59571600  | -0.62413700 | -1.63916400 |
| H | 2.62540700  | -1.12247200 | -1.63555200 |
| H | 3.46776400  | 0.37463900  | -2.06290500 |
| H | 4.26027600  | -1.17949100 | -2.30350400 |

## L2

|   |             |             |             |
|---|-------------|-------------|-------------|
| C | -0.88879800 | 0.51252400  | 0.13334900  |
| C | -1.73307100 | 1.40083400  | -0.52175700 |
| C | -3.08214600 | 1.09165500  | -0.60275100 |
| C | -3.51873200 | -0.08619900 | -0.02931700 |
| C | -2.59315500 | -0.91334800 | 0.60428400  |
| N | -1.30807400 | -0.62509600 | 0.68747900  |
| H | -3.77786800 | 1.75340200  | -1.10041500 |
| H | -1.33489000 | 2.30727700  | -0.95258300 |
| H | -2.91555700 | -1.84350600 | 1.06111000  |
| C | 2.38288800  | 1.97276300  | -0.27883200 |
| C | 2.69494400  | 0.83992100  | 0.72830500  |
| H | 2.78670600  | 1.75422400  | -1.26890600 |
| H | 2.70905000  | 2.95837500  | 0.04470000  |
| H | 2.92070200  | 1.25521400  | 1.71575100  |
| O | 0.94997600  | 1.96767300  | -0.35990300 |
| N | 1.42573500  | 0.11734900  | 0.83690200  |
| C | 0.55861700  | 0.81286400  | 0.24248800  |
| C | -4.95890900 | -0.50801200 | -0.07721300 |
| F | -5.11557400 | -1.63502400 | -0.78239300 |
| F | -5.73579100 | 0.42302500  | -0.63650600 |
| F | -5.43981500 | -0.74915000 | 1.14779800  |
| C | 3.85379700  | -0.02527300 | 0.30073400  |
| C | 5.14521600  | 0.49203100  | 0.36687000  |
| C | 3.66054100  | -1.30809300 | -0.19537000 |
| C | 6.22833500  | -0.25760700 | -0.06497300 |
| H | 5.30411100  | 1.48807900  | 0.76663500  |
| C | 4.74661100  | -2.06125900 | -0.62354900 |
| H | 2.65852100  | -1.71509100 | -0.22785500 |
| C | 6.03011800  | -1.53916400 | -0.56285300 |
| H | 7.22746200  | 0.15463800  | -0.00739400 |
| H | 4.58728300  | -3.06250900 | -1.00282200 |
| H | 6.87413200  | -2.12871800 | -0.89626900 |

## L3

|   |             |            |            |
|---|-------------|------------|------------|
| C | -1.16580200 | 0.72755800 | 0.10915000 |
|---|-------------|------------|------------|

|   |             |             |             |
|---|-------------|-------------|-------------|
| C | -2.23750400 | 1.61660500  | 0.05588100  |
| C | -3.51757000 | 1.09734300  | 0.01639400  |
| C | -3.67220300 | -0.27935000 | 0.02934800  |
| C | -2.54078800 | -1.08378000 | 0.08109700  |
| N | -1.31120500 | -0.59353400 | 0.12109900  |
| H | -4.38307400 | 1.74700400  | -0.02278900 |
| H | -2.05724500 | 2.68108000  | 0.04718500  |
| H | -2.63488100 | -2.16296300 | 0.09168000  |
| C | 1.73475700  | 2.87553400  | 0.01946300  |
| C | 2.39657000  | 1.50841200  | 0.29140600  |
| H | 1.96561200  | 3.25173500  | -0.97992200 |
| H | 1.97284800  | 3.63730800  | 0.75866500  |
| H | 2.84614400  | 1.47097700  | 1.28759300  |
| O | 0.32737700  | 2.60227200  | 0.08256600  |
| N | 1.27487500  | 0.56460900  | 0.26790100  |
| C | 0.22203000  | 1.24742300  | 0.15819200  |
| C | -5.05211500 | -0.86729900 | -0.02287600 |
| F | -5.67201100 | -0.55667100 | -1.16906300 |
| F | -5.82090900 | -0.39753100 | 0.96785900  |
| F | -5.03943700 | -2.19738800 | 0.07587800  |
| C | 3.46444000  | 1.14165500  | -0.74100900 |
| H | 4.15861300  | 1.98168100  | -0.82791700 |
| H | 2.96835100  | 1.02759600  | -1.70888100 |
| C | 4.23014400  | -0.10607900 | -0.38866800 |
| C | 3.64598200  | -1.36456300 | -0.52180900 |
| C | 5.52975200  | -0.02070600 | 0.10131200  |
| C | 4.35036600  | -2.50734600 | -0.17489100 |
| H | 2.62781500  | -1.43989500 | -0.88147400 |
| C | 6.23698400  | -1.16368600 | 0.45030800  |
| H | 5.99701500  | 0.95221500  | 0.20576900  |
| C | 5.64786900  | -2.41126600 | 0.31179300  |
| H | 3.88337500  | -3.47787600 | -0.28298700 |
| H | 7.24844100  | -1.07805700 | 0.82634900  |
| H | 6.19601900  | -3.30493900 | 0.58059500  |

## L4

|   |             |             |             |
|---|-------------|-------------|-------------|
| C | -1.73917900 | -0.09845800 | -0.54311100 |
| C | -2.26314500 | -1.24659700 | 0.03859600  |
| C | -3.61043800 | -1.26469200 | 0.36583900  |
| C | -4.36391400 | -0.13932900 | 0.09663600  |
| C | -3.74561700 | 0.96486700  | -0.48751400 |
| N | -2.46388300 | 0.99059400  | -0.80031100 |
| H | -4.06313000 | -2.13557100 | 0.81997300  |
| H | -1.62512400 | -2.09756000 | 0.22531400  |
| H | -4.31953700 | 1.85996400  | -0.70498300 |
| C | 1.70270600  | -0.97480300 | -1.16131000 |
| C | 1.70381800  | 0.54439400  | -1.55125800 |
| H | 1.66384500  | -1.57004700 | -2.07779400 |
| H | 2.08527000  | 0.65685900  | -2.56649500 |
| O | 0.42820900  | -1.12043600 | -0.51292900 |
| N | 0.28167300  | 0.89119000  | -1.51853900 |
| C | -0.30309200 | -0.04359800 | -0.90648100 |
| C | -5.82957700 | -0.06771400 | 0.41483700  |
| F | -6.09911400 | 0.93796300  | 1.25567700  |
| F | -6.27575300 | -1.19205200 | 0.98024000  |
| F | -6.55982300 | 0.14381900  | -0.68644100 |
| C | 2.51534500  | 1.42816300  | -0.62980000 |
| C | 3.89613000  | 1.49339600  | -0.79936500 |
| C | 1.93045900  | 2.12348700  | 0.42064700  |
| C | 4.68232900  | 2.22277800  | 0.07720700  |
| H | 4.35968500  | 0.95575000  | -1.61900500 |

|   |            |             |             |
|---|------------|-------------|-------------|
| C | 2.71719000 | 2.86003700  | 1.29801500  |
| H | 0.85524300 | 2.10125400  | 0.54297600  |
| C | 4.09292300 | 2.90694000  | 1.13327900  |
| H | 5.75481300 | 2.25953500  | -0.06349300 |
| H | 2.24999000 | 3.40168400  | 2.11047600  |
| H | 4.70426200 | 3.47992800  | 1.81825100  |
| C | 2.82016300 | -1.46103400 | -0.29188400 |
| C | 3.91825000 | -2.07776000 | -0.87817100 |
| C | 2.81478100 | -1.23872000 | 1.08158900  |
| C | 5.01008200 | -2.45413300 | -0.10736900 |
| H | 3.92085400 | -2.26323600 | -1.94662700 |
| C | 3.90037000 | -1.62108100 | 1.85292800  |
| H | 1.95935000 | -0.75975500 | 1.54015500  |
| C | 5.00295500 | -2.22455800 | 1.26016400  |
| H | 5.86106400 | -2.93245800 | -0.57457400 |
| H | 3.88946600 | -1.44307800 | 2.92035600  |
| H | 5.85071500 | -2.51935200 | 1.86471200  |

## L5

|   |             |             |             |
|---|-------------|-------------|-------------|
| C | 1.71058900  | 0.04608500  | 0.06198500  |
| C | 2.31509500  | -0.96007800 | -0.68188000 |
| C | 3.70001000  | -0.99865000 | -0.73703500 |
| C | 4.40901800  | -0.03235100 | -0.05137700 |
| C | 3.71054100  | 0.93796100  | 0.66523400  |
| N | 2.39303400  | 0.97996000  | 0.72488800  |
| H | 4.21531800  | -1.76341700 | -1.30198200 |
| H | 1.70910800  | -1.68825600 | -1.20010500 |
| H | 4.24891100  | 1.70709000  | 1.20980400  |
| C | -1.81615400 | -0.48874300 | -0.49800400 |
| C | -1.84736200 | 0.57209500  | 0.64104900  |
| H | -2.06275300 | -0.01199400 | -1.45074900 |
| H | -2.16519700 | 0.09748000  | 1.57585800  |
| O | -0.42565100 | -0.85374100 | -0.54624600 |
| N | -0.44499800 | 0.95863200  | 0.79456800  |
| C | 0.23241000  | 0.11577500  | 0.14613400  |
| C | 5.91001300  | 0.00538400  | -0.05381500 |
| F | 6.36988800  | 1.15961800  | -0.55110000 |
| F | 6.43535700  | -0.98177000 | -0.78365300 |
| F | 6.40447100  | -0.10554500 | 1.18478300  |
| C | -2.77927400 | 1.71397300  | 0.33705500  |
| C | -4.14769800 | 1.54631100  | 0.53295100  |
| C | -2.30715100 | 2.91064600  | -0.18860600 |
| C | -5.03451500 | 2.55874800  | 0.19722000  |
| H | -4.51718900 | 0.61809500  | 0.95523800  |
| C | -3.19494400 | 3.92596700  | -0.51833000 |
| H | -1.24096700 | 3.04654000  | -0.31703100 |
| C | -4.55888300 | 3.75185100  | -0.33058000 |
| H | -6.09616000 | 2.41992100  | 0.35606800  |
| H | -2.81849800 | 4.85862600  | -0.91850300 |
| H | -5.24865000 | 4.54556100  | -0.58641900 |
| C | -2.69381100 | -1.68182900 | -0.27226900 |
| C | -3.91972100 | -1.77022100 | -0.92095800 |
| C | -2.32482900 | -2.67486500 | 0.63061600  |
| C | -4.77400300 | -2.83489400 | -0.66524100 |
| H | -4.20664400 | -0.99944600 | -1.62704900 |
| C | -3.17265200 | -3.74301100 | 0.87795500  |
| H | -1.36536200 | -2.61213900 | 1.12944400  |
| C | -4.40095100 | -3.82363800 | 0.23294100  |
| H | -5.72688800 | -2.89489400 | -1.17474500 |
| H | -2.87576500 | -4.51534400 | 1.57560600  |
| H | -5.06211200 | -4.65785800 | 0.42779500  |

## L6

|   |             |             |             |
|---|-------------|-------------|-------------|
| C | -2.12711700 | 0.94025900  | 0.09711000  |
| C | -3.35968300 | 1.58669600  | 0.07121200  |
| C | -4.50655000 | 0.81347300  | 0.03612300  |
| C | -4.37153300 | -0.56373900 | 0.02397400  |
| C | -3.09510500 | -1.11612600 | 0.04728400  |
| N | -1.99450600 | -0.38362300 | 0.08331500  |
| H | -5.48741800 | 1.27020200  | 0.01145900  |
| H | -3.40447400 | 2.66546900  | 0.07737200  |
| H | -2.96385300 | -2.19196500 | 0.03018900  |
| C | 0.26279800  | 3.64523300  | 0.02540500  |
| C | 1.19644400  | 2.44109100  | 0.26676700  |
| H | 0.39945100  | 4.07773100  | -0.96855000 |
| H | 0.34581800  | 4.42749800  | 0.77680200  |
| O | -1.05632900 | 3.08444800  | 0.09410400  |
| N | 0.29598000  | 1.28499100  | 0.23158000  |
| C | -0.87699300 | 1.73595800  | 0.14363800  |
| C | -5.58588300 | -1.44632300 | 0.02627300  |
| F | -5.33043500 | -2.64858500 | -0.49545600 |
| F | -6.58852300 | -0.90624400 | -0.67530800 |
| F | -6.04514500 | -1.64586600 | 1.26872100  |
| C | 2.30499700  | 2.31637300  | -0.78054500 |
| H | 1.83266300  | 2.11890900  | -1.74619300 |
| H | 2.81556600  | 3.28008900  | -0.85796200 |
| H | 1.65438800  | 2.48011300  | 1.25925000  |
| C | 3.30373200  | 1.24016900  | -0.44886700 |
| C | 3.02926900  | -0.08053000 | -0.68559500 |
| C | 4.53635500  | 1.58673200  | 0.15751900  |
| C | 3.95198800  | -1.09621400 | -0.34225700 |
| H | 2.07966400  | -0.36256700 | -1.12543900 |
| C | 5.44920200  | 0.63067000  | 0.50041200  |
| H | 4.75458800  | 2.63238500  | 0.34387300  |
| C | 3.67896100  | -2.46616900 | -0.58056500 |
| C | 5.18493000  | -0.73824600 | 0.25962200  |
| H | 6.39076200  | 0.90900900  | 0.95890100  |
| C | 4.58692200  | -3.42807700 | -0.24139100 |
| H | 2.73277900  | -2.73488500 | -1.03466100 |
| C | 6.10734200  | -1.75793600 | 0.59940000  |
| C | 5.81721000  | -3.06991500 | 0.35538000  |
| H | 4.36765400  | -4.47157900 | -0.42696300 |
| H | 7.04805000  | -1.47729800 | 1.05835200  |
| H | 6.52790800  | -3.84228000 | 0.61946000  |

## L7

|   |             |             |             |
|---|-------------|-------------|-------------|
| C | 1.17700100  | 0.30047200  | -0.20174100 |
| C | 1.98623900  | 1.30086700  | 0.32355900  |
| C | 3.34864200  | 1.06469800  | 0.42358600  |
| C | 3.83363400  | -0.15603300 | -0.00248000 |
| C | 2.94122900  | -1.09635000 | -0.51404700 |
| N | 1.64371100  | -0.87807400 | -0.61489500 |
| H | 4.01750900  | 1.81379800  | 0.82488900  |
| H | 1.55016900  | 2.23563900  | 0.64268600  |
| H | 3.30180400  | -2.06203300 | -0.85386400 |
| C | -2.17389200 | 1.63435100  | 0.13926600  |
| C | -2.41431100 | 0.40016100  | -0.78369100 |
| H | -2.59217500 | 0.75591300  | -1.80577700 |
| O | -0.72199800 | 1.73009900  | 0.10509600  |
| N | -1.12663200 | -0.29695300 | -0.78712500 |
| C | -0.28416600 | 0.52105100  | -0.32379300 |
| C | 5.29251700  | -0.50241100 | 0.07043800  |

|   |             |             |             |
|---|-------------|-------------|-------------|
| F | 5.50290600  | -1.57624400 | 0.84133100  |
| F | 6.02152200  | 0.49787200  | 0.57209400  |
| F | 5.78887300  | -0.79229800 | -1.13814800 |
| C | -3.57585400 | -0.47035900 | -0.38419800 |
| C | -4.87010500 | -0.08716000 | -0.72494100 |
| C | -3.38690300 | -1.63104800 | 0.35659000  |
| C | -5.96143600 | -0.83778200 | -0.31287800 |
| H | -5.02415600 | 0.80111200  | -1.32812700 |
| C | -4.47772600 | -2.38606500 | 0.76540600  |
| H | -2.37808400 | -1.94475900 | 0.59310000  |
| C | -5.76678500 | -1.98920300 | 0.43809600  |
| H | -6.96245900 | -0.52982200 | -0.58617000 |
| H | -4.31949000 | -3.29111200 | 1.33775200  |
| H | -6.61561500 | -2.58021400 | 0.75643000  |
| C | -2.75522800 | 2.91928300  | -0.40643900 |
| H | -3.84386400 | 2.84682500  | -0.42867500 |
| H | -2.48192400 | 3.76391600  | 0.22663200  |
| H | -2.39368500 | 3.10516400  | -1.41769300 |
| C | -2.56780300 | 1.39705400  | 1.58667400  |
| H | -2.20985500 | 2.22478400  | 2.19910300  |
| H | -3.65107700 | 1.32364800  | 1.68270300  |
| H | -2.13068900 | 0.46840700  | 1.95644400  |
